# Supplementary material for: Single-cell RNA sequencing of Plasmodium vivax sporozoites reveals stage- and species-specific transcriptomic signatures
Source: PLoS Negl Trop Dis. 2022 Aug 4;16(8):e0010633. doi: 10.1371/journal.pntd.0010633 (PMC9380936; doi:10.1371/journal.pntd.0010633)
Supplement: S1 Table — (XLSX) [file pntd.0010633.s001.xlsx]

## Sheet: Sheet1
Supplementary Table S1. Illumina sequencing metrics.
Replicate	Read	Flowcell	Lane	Length	Total Base	Read Count	GC(%)	Q20(%)	Q30(%)
1	Index	H2YYVCCX2	L001	8	3465869016	433233627	46.55	97.53	94.74
	Read1 (10X Barcode)	H2YYVCCX2	L001	28	12130541556	433233627	48.12	99.02	97.06
	Read2 (Insert)	H2YYVCCX2	L001	91	39424260057	433233627	47.75	95.94	90.5
	R1+R2 Total				51554801613	866467254	47.83	96.66	92.04
2	Index	H72VJCCX2	L002	8	3587567560	448445945	49.28	98.4	96.44
	Read1 (10X Barcode)	H72VJCCX2	L002	28	12556486460	448445945	48.14	99.26	97.96
	Read2 (Insert)	H72VJCCX2	L002	91	40808580995	448445945	43.01	97.03	93.42
	R1+R2 Total				53365067455	896891890	44.22	97.55	94.49
3	Index	H72VJCCX2	L003	8	3632268544	454033568	50.32	98.58	96.78
	Read1 (10X Barcode)	H72VJCCX2	L003	28	12712939904	454033568	48.31	99.25	98
	Read2 (Insert)	H72VJCCX2	L003	91	41317054688	454033568	44.2	97.34	94.01
	R1+R2 Total				54029994592	908067136	45.17	97.79	94.95
