# Supplementary material for: Single-cell RNA sequencing of Plasmodium vivax sporozoites reveals stage- and species-specific transcriptomic signatures
Source: PLoS Negl Trop Dis. 2022 Aug 4;16(8):e0010633. doi: 10.1371/journal.pntd.0010633 (PMC9380936; doi:10.1371/journal.pntd.0010633)
Supplement: S2 Table — (XLSX) [file pntd.0010633.s002.xlsx]

## Sheet: Sheet1
Supplementary Table S2. Alignment statistics for P.vivax sporozoite scRNA-seq data.
	Replicate 1				Replicate 2				Replicate 3
Host	An. dirus				An. dirus				An. dirus
P. vivax strain	Cambodian field isolate				Cambodian field isolate				Cambodian field isolate
Collection Day (day post infection; DPI)	16				18				17
Case Ref No.	909				922				923
	- UTRs	+ UTRs	% change	An. dirus	- UTRs	+ UTRs	% change	An. dirus	- UTRs	+ UTRs	% change	An. dirus
Number of Reads	433000000	433000000	1	433000000	459000000	459000000	1	459000000	448000000	448000000	1	448000000
Reads With Valid Barcodes	0.97	0.97	1	0.97	0.98	0.98	1	0.98	0.97	0.97	1	0.97
Sequencing Saturation	0.98	0.98	1	0.99	0.99	0.99	1	1	0.99	0.99	1	0.99
Q30 Bases in CB+UMI	0.97	0.97	1	0.97	0.98	0.98	1	0.98	0.98	0.98	1	0.98
Q30 Bases in RNA read	0.9	0.9	1	0.9	0.93	0.93	1	0.93	0.92	0.92	1	0.92
Reads Mapped to Genome: Unique+Multiple	0.49	0.49	1	0.38	0.45	0.45	1	0.45	0.55	0.55	1	0.16
Reads Mapped to Genome: Unique	0.47	0.47	1	0.37	0.44	0.44	1	0.45	0.52	0.52	1	0.15
Reads Mapped to Transcriptome: Unique+Multipe Genes	0.2	0.25	1.3	0.25	0.15	0.22	1.44	0.24	0.25	0.31	1.24	0.1
Reads Mapped to Transcriptome: Unique Genes	0.19	0.25	1.31	0.24	0.15	0.22	1.44	0.24	0.24	0.3	1.25	0.1
Total number of cells captured (post QC filtering)	3375				4002				2570
Total number of genes detected (post QC filtering)	1140				1025				949
Total number of UMIs detected (post QC filtering)	929064				764792				597776
Median number of genes detected/cell (post QC filtering)	172				99				147
Median UMI detected/cell (post QC filtering)	263				135				234
