# Supplementary material for: Single-cell RNA sequencing of Plasmodium vivax sporozoites reveals stage- and species-specific transcriptomic signatures
Source: PLoS Negl Trop Dis. 2022 Aug 4;16(8):e0010633. doi: 10.1371/journal.pntd.0010633 (PMC9380936; doi:10.1371/journal.pntd.0010633)
Supplement: S3 Table — (XLSX) [file pntd.0010633.s003.xlsx]

## Sheet: Sheet1
Supplementary Table S3. Comparison of P.vivax sporozoite gene metrics with- and without- UTR information across each replicate.
	Rep1								Rep2								Rep3
	withUTR				noUTR				withUTR				noUTR				withUTR				noUTR
gene	Pv1sum_withUTR	Pv1mean_withUTR	Pv1median_withUTR	Pv1rank_withUTR	Pv1sum_noUTR	Pv1mean_noUTR	Pv1median_noUTR	Pv1rank_noUTR	Pv2sum_withUTR	Pv2mean_withUTR	Pv2median_withUTR	Pv2rank_withUTR	Pv2sum_noUTR	Pv2mean_noUTR	Pv2median_noUTR	Pv2rank_noUTR	Pv3sum_withUTR	Pv3mean_withUTR	Pv3median_withUTR	Pv3rank_withUTR	Pv3sum_noUTR	Pv3mean_noUTR	Pv3median_noUTR	Pv3rank_noUTR
PVP01_0835600	49917	14.7902	14	1	49989	14.8116	14	1	23299	5.82184	1	2	23403	5.84783	1	1	35655	13.8735	14	1	35715	13.8969	14	1
PVP01_1258000	27030	8.00889	7	2	13506	4.00178	3	2	24765	6.18816	6	1	6401	1.59945	1	4	18088	7.03813	6	2	5675	2.20817	2	5
PVP01_1212300	12755	3.77926	3	3	8842	2.61985	2	4	12745	3.18466	3	3	6222	1.55472	1	5	9852	3.83346	3	3	6209	2.41595	2	4
PVP01_0710400	12668	3.75348	3	4	4450	1.31852	1	16	6055	1.51299	1	11	2254	0.563218	0	40	7203	2.80272	2	6	2349	0.914008	1	24
PVP01_0938800	10023	2.96978	2	5	10055	2.97926	2	3	5808	1.45127	0	12	5845	1.46052	0	8	7418	2.88638	2	5	7437	2.89377	2	3
PVP01_1460700	9234	2.736	2	6	7887	2.33689	2	5	6930	1.73163	1	6	5239	1.3091	1	10	5417	2.10778	2	8	3990	1.55253	1	10
PVP01_1413500	7300	2.16296	2	7	7344	2.176	2	6	10003	2.4995	2	4	10067	2.51549	2	2	5292	2.05914	2	9	5308	2.06537	2	7
PVP01_1022600	7179	2.12711	2	8	6942	2.05689	2	7	5722	1.42979	1	13	5513	1.37756	1	9	5702	2.21868	2	7	5578	2.17043	2	6
PVP01_0515400	7000	2.07407	1	9	6566	1.94548	1	8	3821	0.954773	0	28	3525	0.88081	0	19	4048	1.5751	1	14	3757	1.46187	1	12
PVP01_0602100	6443	1.90904	1	10	6452	1.9117	1	9	2422	0.605197	0	56	2434	0.608196	0	35	2754	1.0716	0	31	2758	1.07315	0	17
PVP01_1315100	5984	1.77304	1	11	3682	1.09096	1	21	5311	1.32709	1	14	2809	0.701899	0	27	4602	1.79066	1	11	2660	1.03502	1	18
PVP01_0835700	5916	1.75289	1	12	5868	1.73867	1	10	6228	1.55622	1	7	6163	1.53998	1	6	5043	1.96226	2	10	5013	1.95058	2	8
PVP01_1131600	5620	1.66519	1	13	5522	1.63615	1	12	4941	1.23463	0	18	4669	1.16667	0	11	4417	1.71868	1	12	4188	1.62957	1	9
PVP01_0917500	5553	1.64533	1	14	3180	0.942222	1	24	6172	1.54223	1	8	4161	1.03973	1	15	3709	1.44319	1	16	2117	0.823735	1	27
PVP01_1132600	5544	1.64267	1	15	5556	1.64622	1	11	2392	0.597701	0	58	2409	0.601949	0	36	2580	1.00389	0	34	2592	1.00856	0	20
PVP01_1225100	5291	1.5677	1	16	5301	1.57067	1	14	3725	0.930785	0	31	3746	0.936032	0	17	3315	1.28988	1	23	3329	1.29533	1	13
PVP01_0611700	5289	1.56711	1	17	5349	1.58489	1	13	8809	2.20115	2	5	8793	2.19715	2	3	8999	3.50156	3	4	8953	3.48366	3	2
PVP01_1456100	5002	1.48207	1	18	2472	0.732444	0	40	6169	1.54148	1	9	2551	0.637431	0	31	4271	1.66187	1	13	1961	0.763035	0	28
PVP01_0412300	4863	1.44089	1	19	4762	1.41096	1	15	6141	1.53448	1	10	5937	1.48351	1	7	4010	1.56031	1	15	3789	1.47432	1	11
PVP01_0923400	4643	1.3757	1	20	3895	1.15407	1	19	3622	0.905047	0	35	3051	0.762369	0	26	2600	1.01167	1	33	2139	0.832296	0	26
PVP01_0811600	4571	1.35437	1	21	1933	0.572741	0	57	3939	0.984258	1	25	2227	0.556472	0	41	3243	1.26187	1	26	1466	0.570428	0	48
PVP01_0927900	4422	1.31022	1	22	1984	0.587852	0	55	4785	1.19565	1	20	1467	0.366567	0	71	3398	1.32218	1	21	1146	0.445914	0	65
PVP01_1011900	4380	1.29778	1	23	2973	0.880889	1	27	5301	1.32459	1	15	4424	1.10545	1	13	2229	0.867315	1	45	1702	0.662257	0	36
PVP01_1242200	4334	1.28415	1	24	2465	0.73037	0	41	2944	0.735632	0	43	1688	0.421789	0	53	2202	0.856809	0	47	1196	0.46537	0	61
PVP01_1011800	4267	1.2643	1	25	0	0	0	0	4752	1.18741	1	21	0	0	0	0	2392	0.930739	1	39	0	0	0	0
PVP01_0317600	4150	1.22963	1	26	2735	0.81037	1	35	5070	1.26687	1	17	3996	0.998501	1	16	3282	1.27704	1	24	2217	0.862646	1	25
PVP01_0912600	4106	1.21659	1	27	4090	1.21185	1	17	3386	0.846077	1	38	3371	0.842329	1	20	1640	0.638132	0	63	1624	0.631907	0	37
PVP01_1461700	4059	1.20267	1	28	3956	1.17215	1	18	3663	0.915292	1	34	3597	0.898801	1	18	2472	0.961868	1	38	2403	0.935019	1	23
PVP01_0505600	4034	1.19526	1	29	2180	0.645926	0	49	3804	0.950525	1	29	1607	0.401549	0	62	3119	1.21362	1	28	1521	0.591829	0	42
PVP01_1111200	3746	1.10993	1	30	785	0.232593	0	187	3714	0.928036	0	32	1043	0.26062	0	104	3275	1.27432	1	25	677	0.263424	0	132
PVP01_1249700	3737	1.10726	1	31	468	0.138667	0	304	4327	1.08121	1	22	590	0.147426	0	195	3366	1.30973	1	22	543	0.211284	0	166
PVP01_0602700	3733	1.10607	1	32	1012	0.299852	0	135	3791	0.947276	1	30	787	0.196652	0	140	1741	0.677432	0	59	540	0.210117	0	168
PVP01_0934200	3682	1.09096	1	33	3714	1.10044	1	20	2484	0.62069	0	52	2520	0.629685	0	32	2864	1.1144	1	30	2895	1.12646	1	16
PVP01_1014200	3640	1.07852	1	34	1240	0.367407	0	92	3605	0.9008	1	36	1655	0.413543	0	56	2325	0.904669	1	41	932	0.362646	0	88
PVP01_0319000	3571	1.05807	1	35	2940	0.871111	0	29	3270	0.817091	0	42	2362	0.590205	0	38	3529	1.37315	1	17	2621	1.01984	1	19
PVP01_0532200	3516	1.04178	1	36	3378	1.00089	1	23	2458	0.614193	0	53	2300	0.574713	0	39	2016	0.784436	0	50	1920	0.747082	0	29
PVP01_1453200	3469	1.02785	1	37	2977	0.882074	1	26	5157	1.28861	1	16	4420	1.10445	1	14	3404	1.32451	1	20	3030	1.17899	1	15
PVP01_1343900	3431	1.01659	1	38	3119	0.924148	1	25	2733	0.682909	0	47	2553	0.637931	0	30	1571	0.611284	0	73	1428	0.555642	0	50
PVP01_0613700	3423	1.01422	1	39	2960	0.877037	1	28	4875	1.21814	1	19	4434	1.10795	1	12	2215	0.861868	1	46	1866	0.72607	0	33
PVP01_0303900	3418	1.01274	1	40	3425	1.01481	1	22	1840	0.45977	0	81	1848	0.461769	0	47	1615	0.628405	0	66	1621	0.630739	0	38
PVP01_1120200	3401	1.0077	1	41	2258	0.669037	0	47	3695	0.923288	1	33	2496	0.623688	0	33	2963	1.15292	1	29	1852	0.720623	0	34
PVP01_1427300	3384	1.00267	1	42	2813	0.833481	1	32	2429	0.606947	0	55	1772	0.442779	0	49	1841	0.716342	0	52	1473	0.573152	0	47
PVP01_0712500	3350	0.992593	1	43	490	0.145185	0	297	2868	0.716642	0	45	0	0	0	0	1959	0.762257	0	51	257	0.1	0	305
PVP01_0611800	3279	0.971556	1	44	922	0.273185	0	149	2334	0.583208	0	61	584	0.145927	0	197	2027	0.788716	0	49	498	0.193774	0	181
PVP01_1422800	3167	0.93837	1	45	2492	0.73837	0	38	3511	0.877311	0	37	3058	0.764118	0	25	2349	0.914008	1	40	1919	0.746693	0	30
PVP01_1213900	3163	0.937185	1	46	559	0.16563	0	264	2183	0.545477	0	69	455	0.113693	0	243	2248	0.874708	0	44	318	0.123735	0	263
PVP01_1131800	3137	0.929481	1	47	1990	0.58963	0	54	4208	1.05147	1	23	3339	0.834333	1	21	2657	1.03385	1	32	1897	0.738132	1	31
PVP01_0730900	3113	0.92237	1	48	454	0.134519	0	311	3962	0.990005	1	24	473	0.118191	0	239	3213	1.25019	1	27	481	0.18716	0	189
PVP01_1411700	3090	0.915556	1	49	2906	0.861037	1	30	3282	0.82009	1	41	3152	0.787606	1	23	2515	0.978599	1	36	2436	0.94786	1	22
PVP01_1432200	3052	0.904296	1	50	2105	0.623704	0	51	3848	0.961519	1	26	3204	0.8006	1	22	3409	1.32646	1	19	2575	1.00195	1	21
PVP01_1344100	2983	0.883852	1	51	1586	0.469926	0	69	2220	0.554723	0	68	990	0.247376	0	109	2132	0.829572	1	48	1042	0.405447	0	75
PVP01_1210400	2962	0.87763	1	52	2739	0.811556	1	34	1933	0.483009	0	80	1518	0.37931	0	68	1797	0.699222	0	56	1583	0.615953	0	40
PVP01_0807700	2947	0.873185	1	53	2700	0.8	1	36	2231	0.557471	0	66	1986	0.496252	0	45	1577	0.613619	0	71	1437	0.559144	0	49
PVP01_0516700	2923	0.866074	1	54	449	0.133037	0	313	2401	0.59995	0	57	0	0	0	0	1604	0.624125	0	69	221	0.0859922	0	331
PVP01_0934800	2881	0.85363	1	55	2272	0.673185	0	46	2244	0.56072	0	65	1414	0.353323	0	72	1394	0.542412	0	83	1065	0.414397	0	70
PVP01_1405700	2802	0.830222	0	56	1950	0.577778	0	56	2054	0.513243	0	76	1536	0.383808	0	67	1302	0.506615	0	89	925	0.359922	0	89
PVP01_0117400	2777	0.822815	0	57	0	0	0	0	2533	0.632934	0	49	553	0.138181	0	205	2258	0.878599	1	43	379	0.147471	0	231
PVP01_1014700	2773	0.82163	1	58	662	0.196148	0	228	3827	0.956272	1	27	985	0.246127	0	110	2490	0.968872	1	37	663	0.257977	0	135
PVP01_1308600	2742	0.812444	1	59	2488	0.737185	0	39	2098	0.524238	0	74	1784	0.445777	0	48	1573	0.612062	0	72	1397	0.54358	0	52
PVP01_0914900	2710	0.802963	1	60	1131	0.335111	0	114	3331	0.832334	1	39	950	0.237381	0	113	2320	0.902724	1	42	874	0.340078	0	93
PVP01_1242100	2699	0.799704	1	61	2458	0.728296	1	42	2116	0.528736	0	73	1608	0.401799	0	61	1710	0.66537	0	61	1495	0.581712	0	44
PVP01_1405400	2687	0.796148	0	62	2781	0.824	0	33	2442	0.610195	0	54	2554	0.638181	0	29	1830	0.712062	0	53	1888	0.73463	0	32
PVP01_0614100	2660	0.788148	1	63	430	0.127407	0	323	2391	0.597451	0	59	627	0.156672	0	184	1611	0.626848	0	68	325	0.126459	0	259
PVP01_0526500	2655	0.786667	0	64	2041	0.604741	0	53	2600	0.649675	0	48	2046	0.511244	0	44	1807	0.703113	0	54	1389	0.540467	0	53
PVP01_1144400	2606	0.772148	0	65	944	0.279704	0	145	2028	0.506747	0	77	740	0.184908	0	152	1557	0.605837	0	75	503	0.19572	0	178
PVP01_1306500	2551	0.755852	0	66	2560	0.758519	0	37	1327	0.331584	0	131	1340	0.334833	0	80	998	0.388327	0	132	1001	0.389494	0	80
PVP01_1110200	2450	0.725926	0	67	2233	0.66163	0	48	2521	0.629935	0	50	2149	0.536982	0	42	1723	0.670428	0	60	1488	0.578988	0	46
PVP01_1463200	2432	0.720593	0	68	1420	0.420741	0	81	2136	0.533733	0	71	1147	0.286607	0	93	2548	0.99144	0	35	1575	0.61284	0	41
PVP01_1203000	2423	0.717926	0	69	2377	0.704296	0	44	2485	0.62094	0	51	2439	0.609445	0	34	1542	0.6	0	76	1502	0.584436	0	43
PVP01_0927000	2420	0.717037	0	70	2430	0.72	0	43	1329	0.332084	0	129	1332	0.332834	0	81	964	0.375097	0	138	964	0.375097	0	84
PVP01_1461800	2380	0.705185	0	71	1755	0.52	0	61	2383	0.595452	0	60	1485	0.371064	0	70	1283	0.499222	0	90	810	0.315175	0	104
PVP01_0723900	2368	0.70163	0	72	2370	0.702222	0	45	1759	0.43953	0	89	1766	0.441279	0	50	1368	0.532296	0	84	1371	0.533463	0	55
PVP01_0517100	2367	0.701333	0	73	1525	0.451852	0	75	2856	0.713643	0	46	1649	0.412044	0	57	1805	0.702335	0	55	1048	0.407782	0	74
PVP01_1008000	2305	0.682963	0	74	708	0.209778	0	212	1458	0.364318	0	120	661	0.165167	0	175	1028	0.4	0	128	369	0.14358	0	237
PVP01_0106700	2303	0.68237	0	75	2866	0.849185	1	31	1542	0.385307	0	111	1721	0.430035	0	52	1162	0.45214	0	104	1339	0.521012	0	57
PVP01_1413800	2287	0.67763	0	76	1913	0.566815	0	59	1500	0.374813	0	116	1161	0.290105	0	92	961	0.37393	0	139	801	0.311673	0	108
PVP01_0527700	2206	0.65363	0	77	771	0.228444	0	193	1328	0.331834	0	130	446	0.111444	0	248	941	0.366148	0	144	367	0.142802	0	238
PVP01_0303700	2179	0.64563	0	78	2110	0.625185	0	50	1692	0.422789	0	95	1604	0.4008	0	63	1558	0.606226	0	74	1489	0.579377	0	45
PVP01_1310600	2131	0.631407	0	79	1049	0.310815	0	128	1631	0.407546	0	100	640	0.15992	0	181	1218	0.47393	0	97	548	0.21323	0	163
PVP01_0726800	2125	0.62963	0	80	356	0.105481	0	360	1115	0.278611	0	162	0	0	0	0	1052	0.409339	0	123	0	0	0	0
PVP01_0210700	2118	0.627556	0	81	1925	0.57037	0	58	3318	0.829085	1	40	3145	0.785857	0	24	3424	1.3323	1	18	3199	1.24475	1	14
PVP01_0305100	2090	0.619259	0	82	762	0.225778	0	195	1455	0.363568	0	121	601	0.150175	0	193	1522	0.592218	0	77	546	0.212451	0	164
PVP01_0313300	2083	0.617185	0	83	412	0.122074	0	333	1786	0.446277	0	87	0	0	0	0	1585	0.616732	0	70	0	0	0	0
PVP01_1314200	2083	0.617185	0	83	1990	0.58963	0	54	1790	0.447276	0	85	1615	0.403548	0	60	1425	0.554475	0	82	1289	0.501556	0	59
PVP01_0921600	2057	0.609481	0	84	0	0	0	0	2321	0.57996	0	62	249	0.0622189	0	366	1614	0.628016	0	67	0	0	0	0
PVP01_0911200	2044	0.60563	0	85	1751	0.518815	0	63	1397	0.349075	0	127	1077	0.269115	0	99	1108	0.431128	0	114	896	0.348638	0	91
PVP01_1238800	2037	0.603556	0	86	2046	0.606222	0	52	1213	0.303098	0	147	1217	0.304098	0	90	1118	0.435019	0	110	1128	0.438911	0	68
PVP01_0933800	2011	0.595852	0	87	1420	0.420741	0	81	1533	0.383058	0	113	908	0.226887	0	118	1158	0.450584	0	105	786	0.305837	0	111
PVP01_0112200	1965	0.582222	0	88	941	0.278815	0	146	1735	0.433533	0	92	588	0.146927	0	196	1753	0.682101	0	58	758	0.294942	0	119
PVP01_0715100	1948	0.577185	0	89	0	0	0	0	925	0.231134	0	190	0	0	0	0	1275	0.496109	0	91	0	0	0	0
PVP01_0802200	1945	0.576296	0	90	1453	0.430519	0	80	1999	0.4995	0	79	1244	0.310845	0	86	1177	0.457977	0	103	825	0.321012	0	102
PVP01_0305400	1932	0.572444	0	91	1176	0.348444	0	104	2084	0.52074	0	75	895	0.223638	0	120	1348	0.524514	0	85	721	0.280545	0	123
PVP01_1333500	1898	0.56237	0	92	880	0.260741	0	158	1452	0.362819	0	122	737	0.184158	0	154	938	0.364981	0	145	412	0.160311	0	216
PVP01_0806900	1894	0.561185	0	93	785	0.232593	0	187	1684	0.42079	0	96	878	0.21939	0	122	1626	0.632685	0	64	691	0.268872	0	130
PVP01_0723600	1889	0.559704	0	94	596	0.176593	0	251	1577	0.394053	0	107	476	0.118941	0	237	1117	0.43463	0	111	340	0.132296	0	247
PVP01_0113600	1876	0.555852	0	95	1274	0.377481	0	89	1471	0.367566	0	118	805	0.201149	0	135	1109	0.431518	0	113	699	0.271984	0	128
PVP01_1003900	1864	0.552296	0	96	1037	0.307259	0	130	1787	0.446527	0	86	549	0.137181	0	207	1106	0.43035	0	115	443	0.172374	0	202
PVP01_0825600	1861	0.551407	0	97	389	0.115259	0	344	1555	0.388556	0	108	501	0.125187	0	227	1040	0.404669	0	126	0	0	0	0
PVP01_1228600	1852	0.548741	0	98	882	0.261333	0	157	1604	0.4008	0	104	790	0.197401	0	138	1126	0.438132	0	109	542	0.210895	0	167
PVP01_1235600	1845	0.546667	0	99	493	0.146074	0	294	948	0.236882	0	184	226	0.0564718	0	382	723	0.281323	0	194	0	0	0	0
PVP01_1232200	1808	0.535704	0	100	1626	0.481778	0	67	1614	0.403298	0	103	1413	0.353073	0	73	946	0.368093	0	142	829	0.322568	0	100
PVP01_0210600	1803	0.534222	0	101	857	0.253926	0	165	1066	0.266367	0	167	678	0.169415	0	169	893	0.347471	0	156	712	0.277043	0	125
PVP01_1423600	1795	0.531852	0	102	1542	0.456889	0	71	1202	0.30035	0	150	937	0.234133	0	114	1332	0.518288	0	87	1167	0.454086	0	63
PVP01_1319400	1784	0.528593	0	103	1539	0.456	0	72	1622	0.405297	0	101	1395	0.348576	0	75	1428	0.555642	0	81	1234	0.480156	0	60
PVP01_0528300	1767	0.523556	0	104	1526	0.452148	0	74	1402	0.350325	0	126	1139	0.284608	0	94	906	0.352529	0	153	764	0.297276	0	116
PVP01_1435400	1767	0.523556	0	104	1793	0.531259	0	60	2287	0.571464	0	63	2370	0.592204	0	37	1704	0.663035	0	62	1737	0.675875	0	35
PVP01_1218700	1732	0.513185	0	105	1752	0.519111	0	62	1286	0.321339	0	139	1346	0.336332	0	78	1319	0.51323	0	88	1346	0.523735	0	56
PVP01_1436800	1723	0.510519	0	106	1195	0.354074	0	100	1798	0.449275	0	83	1055	0.263618	0	101	1086	0.422568	0	116	753	0.292996	0	121
PVP01_0912800	1713	0.507556	0	107	0	0	0	0	2151	0.537481	0	70	0	0	0	0	1430	0.55642	0	80	0	0	0	0
PVP01_1117400	1713	0.507556	0	107	1078	0.319407	0	121	1714	0.428286	0	94	819	0.204648	0	129	1210	0.470817	0	99	671	0.261089	0	133
PVP01_1311000	1700	0.503704	0	108	1217	0.360593	0	93	1162	0.290355	0	155	778	0.194403	0	142	761	0.296109	0	186	516	0.200778	0	175
PVP01_0618400	1665	0.493333	0	109	1654	0.490074	0	65	1668	0.416792	0	97	1661	0.415042	0	55	1045	0.406615	0	125	1050	0.40856	0	72
PVP01_0807300	1664	0.493037	0	110	0	0	0	0	2228	0.556722	0	67	0	0	0	0	1179	0.458755	0	102	0	0	0	0
PVP01_0108700	1654	0.490074	0	111	1143	0.338667	0	111	764	0.190905	0	236	469	0.117191	0	240	1262	0.491051	0	93	827	0.32179	0	101
PVP01_1026100	1629	0.482667	0	112	1656	0.490667	0	64	1753	0.438031	0	90	1757	0.43903	0	51	1006	0.39144	0	130	1020	0.396887	0	77
PVP01_1439100	1625	0.481481	0	113	1629	0.482667	0	66	1216	0.303848	0	146	1218	0.304348	0	89	1061	0.41284	0	121	1063	0.413619	0	71
PVP01_1010500	1603	0.474963	0	114	1014	0.300444	0	134	2016	0.503748	0	78	1602	0.4003	0	64	1150	0.447471	0	106	850	0.330739	0	96
PVP01_0607800	1599	0.473778	0	115	1087	0.322074	0	120	1194	0.298351	0	152	761	0.190155	0	147	1071	0.416732	0	119	840	0.326848	0	98
PVP01_1124900	1597	0.473185	0	116	1520	0.45037	0	77	1296	0.323838	0	138	1222	0.305347	0	88	820	0.319066	0	169	768	0.298833	0	115
PVP01_1032700	1595	0.472593	0	117	1194	0.353778	0	101	1595	0.398551	0	105	869	0.217141	0	123	1495	0.581712	0	78	1024	0.398444	0	76
PVP01_1403100	1586	0.469926	0	118	1589	0.470815	0	68	783	0.195652	0	227	789	0.197151	0	139	798	0.310506	0	175	800	0.311284	0	109
PVP01_0216000	1569	0.464889	0	119	829	0.24563	0	177	1146	0.286357	0	157	503	0.125687	0	226	785	0.305447	0	179	376	0.146304	0	233
PVP01_0418100	1569	0.464889	0	119	1528	0.452741	0	73	2127	0.531484	0	72	2090	0.522239	0	43	1617	0.629183	0	65	1590	0.618677	0	39
PVP01_0516800	1556	0.461037	0	120	1573	0.466074	0	70	1621	0.405047	0	102	1635	0.408546	0	58	889	0.345914	0	157	893	0.347471	0	92
PVP01_0526600	1555	0.460741	0	121	1419	0.420444	0	82	1750	0.437281	0	91	1577	0.394053	0	65	1252	0.48716	0	95	1150	0.447471	0	64
PVP01_0517200	1537	0.455407	0	122	1482	0.439111	0	79	1224	0.305847	0	144	1171	0.292604	0	91	1024	0.398444	0	129	989	0.384825	0	81
PVP01_1425800	1526	0.452148	0	123	297	0.088	0	399	1313	0.328086	0	134	246	0.0614693	0	368	1028	0.4	0	128	0	0	0	0
PVP01_1440500	1526	0.452148	0	123	1524	0.451556	0	76	1407	0.351574	0	124	1407	0.351574	0	74	854	0.332296	0	164	852	0.331518	0	95
PVP01_1316800	1522	0.450963	0	124	1070	0.317037	0	122	1580	0.394803	0	106	805	0.201149	0	135	945	0.367704	0	143	595	0.231518	0	148
PVP01_1136000	1515	0.448889	0	125	1167	0.345778	0	106	2246	0.561219	0	64	1903	0.475512	0	46	1340	0.521401	0	86	1007	0.391829	0	78
PVP01_1404300	1510	0.447407	0	126	841	0.249185	0	170	1098	0.274363	0	166	579	0.144678	0	198	765	0.297665	0	185	411	0.159922	0	217
PVP01_1245500	1494	0.442667	0	127	1341	0.397333	0	84	1729	0.432034	0	93	1634	0.408296	0	59	1002	0.389883	0	131	915	0.356031	0	90
PVP01_1427800	1470	0.435556	0	128	917	0.271704	0	151	1546	0.386307	0	110	695	0.173663	0	164	856	0.333074	0	163	483	0.187938	0	187
PVP01_0615300	1463	0.433481	0	129	1394	0.413037	0	83	2873	0.717891	0	44	2662	0.665167	0	28	1490	0.579767	0	79	1405	0.546693	0	51
PVP01_0925500	1460	0.432593	0	130	1273	0.377185	0	90	994	0.248376	0	177	844	0.210895	0	125	923	0.359144	0	147	804	0.31284	0	106
PVP01_1315300	1454	0.430815	0	131	597	0.176889	0	250	1836	0.458771	0	82	538	0.134433	0	212	994	0.38677	0	133	0	0	0	0
PVP01_1030500	1451	0.429926	0	132	1114	0.330074	0	116	1212	0.302849	0	148	1115	0.278611	0	96	1084	0.42179	0	117	956	0.371984	0	85
PVP01_0418900	1442	0.427259	0	133	1094	0.324148	0	119	1635	0.408546	0	99	1313	0.328086	0	82	1264	0.491829	0	92	1002	0.389883	0	79
PVP01_1305400	1436	0.425481	0	134	1197	0.354667	0	99	933	0.233133	0	187	742	0.185407	0	150	753	0.292996	0	188	631	0.245525	0	140
PVP01_0729600	1431	0.424	0	135	1299	0.384889	0	88	1518	0.37931	0	114	1368	0.341829	0	77	1261	0.490661	0	94	1186	0.461479	0	62
PVP01_1105900	1429	0.423407	0	136	511	0.151407	0	285	1171	0.292604	0	154	572	0.142929	0	201	1032	0.401556	0	127	432	0.168093	0	207
PVP01_1119800	1420	0.420741	0	137	703	0.208296	0	214	816	0.203898	0	217	465	0.116192	0	241	468	0.182101	0	282	221	0.0859922	0	331
PVP01_1429700	1417	0.419852	0	138	0	0	0	0	672	0.167916	0	274	0	0	0	0	810	0.315175	0	171	0	0	0	0
PVP01_0607900	1413	0.418667	0	139	776	0.229926	0	191	1797	0.449025	0	84	1309	0.327086	0	83	949	0.369261	0	140	607	0.236187	0	145
PVP01_1247100	1402	0.415407	0	140	1109	0.328593	0	117	1045	0.261119	0	170	823	0.205647	0	128	982	0.382101	0	135	761	0.296109	0	117
PVP01_1002700	1393	0.412741	0	141	1306	0.386963	0	87	608	0.151924	0	294	538	0.134433	0	212	650	0.252918	0	214	582	0.226459	0	152
PVP01_1251200	1393	0.412741	0	141	950	0.281481	0	144	1231	0.307596	0	143	763	0.190655	0	146	911	0.354475	0	151	655	0.254864	0	136
PVP01_1252500	1379	0.408593	0	142	1312	0.388741	0	86	1760	0.43978	0	88	1687	0.421539	0	54	1028	0.4	0	128	987	0.384047	0	82
PVP01_1262200	1367	0.405037	0	143	813	0.240889	0	179	1357	0.33908	0	128	588	0.146927	0	196	1059	0.412062	0	122	549	0.213619	0	162
PVP01_0530300	1358	0.40237	0	144	1518	0.449778	0	78	1145	0.286107	0	158	1237	0.309095	0	87	1213	0.471984	0	98	1320	0.513619	0	58
PVP01_0717400	1347	0.399111	0	145	978	0.289778	0	140	1480	0.369815	0	117	1053	0.263118	0	102	768	0.298833	0	183	496	0.192996	0	182
PVP01_0714500	1335	0.395556	0	146	229	0.0678519	0	446	1434	0.358321	0	123	0	0	0	0	875	0.340467	0	160	0	0	0	0
PVP01_0210400	1311	0.388444	0	147	1316	0.389926	0	85	708	0.176912	0	258	711	0.177661	0	160	561	0.218288	0	249	561	0.218288	0	158
PVP01_0813100	1309	0.387852	0	148	1119	0.331556	0	115	1108	0.276862	0	163	912	0.227886	0	117	876	0.340856	0	159	775	0.301556	0	112
PVP01_1436200	1305	0.386667	0	149	356	0.105481	0	360	971	0.242629	0	180	297	0.0742129	0	331	914	0.355642	0	150	258	0.100389	0	304
PVP01_0718000	1304	0.38637	0	150	1251	0.370667	0	91	1514	0.378311	0	115	1498	0.374313	0	69	1066	0.414786	0	120	1063	0.413619	0	71
PVP01_1325400	1301	0.385481	0	151	1152	0.341333	0	107	599	0.149675	0	297	537	0.134183	0	213	568	0.221012	0	246	499	0.194163	0	180
PVP01_1334800	1297	0.384296	0	152	0	0	0	0	1480	0.369815	0	117	0	0	0	0	1076	0.418677	0	118	0	0	0	0
PVP01_1110800	1291	0.382519	0	153	653	0.193481	0	230	1002	0.250375	0	175	483	0.12069	0	233	731	0.284436	0	191	310	0.120623	0	269
PVP01_1260400	1289	0.381926	0	154	307	0.090963	0	393	1662	0.415292	0	98	296	0.073963	0	332	1348	0.524514	0	85	291	0.11323	0	280
PVP01_0825500	1285	0.380741	0	155	978	0.289778	0	140	1188	0.296852	0	153	976	0.243878	0	111	1231	0.478988	0	96	976	0.379767	0	83
PVP01_0302700	1273	0.377185	0	156	646	0.191407	0	233	899	0.224638	0	195	0	0	0	0	525	0.20428	0	265	252	0.0980545	0	308
PVP01_0939800	1252	0.370963	0	157	453	0.134222	0	312	756	0.188906	0	242	360	0.089955	0	293	690	0.268482	0	202	266	0.103502	0	296
PVP01_0916500	1250	0.37037	0	158	411	0.121778	0	334	1129	0.282109	0	159	0	0	0	0	777	0.302335	0	181	0	0	0	0
PVP01_0816500	1249	0.370074	0	159	1209	0.358222	0	96	722	0.18041	0	252	706	0.176412	0	162	567	0.220623	0	247	551	0.214397	0	161
PVP01_0803200	1242	0.368	0	160	1144	0.338963	0	110	735	0.183658	0	247	677	0.169165	0	170	615	0.2393	0	224	582	0.226459	0	152
PVP01_0529800	1241	0.367704	0	161	783	0.232	0	188	864	0.215892	0	203	385	0.0962019	0	281	573	0.222957	0	243	274	0.106615	0	290
PVP01_1257900	1234	0.36563	0	162	0	0	0	0	830	0.207396	0	212	0	0	0	0	787	0.306226	0	178	0	0	0	0
PVP01_0214400	1216	0.360296	0	163	731	0.216593	0	204	939	0.234633	0	186	654	0.163418	0	177	721	0.280545	0	196	426	0.165759	0	209
PVP01_1227000	1214	0.359704	0	164	872	0.25837	0	161	1404	0.350825	0	125	812	0.202899	0	132	910	0.354086	0	152	537	0.208949	0	170
PVP01_0715000	1210	0.358519	0	165	0	0	0	0	796	0.198901	0	222	0	0	0	0	700	0.272374	0	201	0	0	0	0
PVP01_0717300	1210	0.358519	0	165	1134	0.336	0	113	672	0.167916	0	274	607	0.151674	0	189	647	0.251751	0	215	605	0.235409	0	146
PVP01_1453000	1210	0.358519	0	165	0	0	0	0	1614	0.403298	0	103	0	0	0	0	980	0.381323	0	136	0	0	0	0
PVP01_1233600	1207	0.35763	0	166	1216	0.360296	0	94	1011	0.252624	0	174	1011	0.252624	0	108	803	0.312451	0	173	803	0.312451	0	107
PVP01_1217900	1204	0.356741	0	167	1150	0.340741	0	108	1126	0.281359	0	160	1108	0.276862	0	97	864	0.336187	0	162	842	0.327626	0	97
PVP01_0619000	1203	0.356444	0	168	1212	0.359111	0	95	1023	0.255622	0	172	1028	0.256872	0	107	788	0.306615	0	177	789	0.307004	0	110
PVP01_1240500	1203	0.356444	0	168	1140	0.337778	0	112	1046	0.261369	0	169	1033	0.258121	0	105	812	0.315953	0	170	806	0.313619	0	105
PVP01_1212200	1202	0.356148	0	169	1171	0.346963	0	105	857	0.214143	0	204	828	0.206897	0	127	744	0.289494	0	189	713	0.277432	0	124
PVP01_0908100	1200	0.355556	0	170	1207	0.35763	0	97	1240	0.309845	0	141	1248	0.311844	0	85	1140	0.44358	0	107	1144	0.445136	0	66
PVP01_0110600	1196	0.35437	0	171	1183	0.350519	0	103	778	0.194403	0	230	740	0.184908	0	152	731	0.284436	0	191	706	0.274708	0	126
PVP01_1238400	1195	0.354074	0	172	0	0	0	0	738	0.184408	0	246	0	0	0	0	429	0.166926	0	302	0	0	0	0
PVP01_1461400	1192	0.353185	0	173	1192	0.353185	0	102	632	0.157921	0	286	635	0.158671	0	182	520	0.202335	0	267	520	0.202335	0	174
PVP01_0408100	1189	0.352296	0	174	0	0	0	0	757	0.189155	0	241	0	0	0	0	621	0.241634	0	222	0	0	0	0
PVP01_0319900	1171	0.346963	0	175	694	0.20563	0	218	950	0.237381	0	183	651	0.162669	0	178	683	0.265759	0	204	447	0.17393	0	199
PVP01_1230400	1170	0.346667	0	176	1068	0.316444	0	123	907	0.226637	0	194	727	0.181659	0	156	503	0.19572	0	272	435	0.169261	0	206
PVP01_1425500	1166	0.345481	0	177	1206	0.357333	0	98	1314	0.328336	0	133	1341	0.335082	0	79	918	0.357198	0	148	938	0.364981	0	86
PVP01_1025900	1163	0.344593	0	178	0	0	0	0	846	0.211394	0	208	0	0	0	0	725	0.282101	0	193	0	0	0	0
PVP01_1334400	1159	0.343407	0	179	1012	0.299852	0	135	541	0.135182	0	317	453	0.113193	0	245	516	0.200778	0	268	447	0.17393	0	199
PVP01_1115100	1151	0.341037	0	180	663	0.196444	0	227	884	0.22089	0	198	499	0.124688	0	228	562	0.218677	0	248	340	0.132296	0	247
PVP01_1121300	1150	0.340741	0	181	219	0.0648889	0	451	761	0.190155	0	238	148	0.0369815	0	440	548	0.21323	0	256	101	0.0392996	0	407
PVP01_0710900	1148	0.340148	0	182	831	0.246222	0	175	699	0.174663	0	262	385	0.0962019	0	281	613	0.238521	0	226	375	0.145914	0	234
PVP01_1121400	1148	0.340148	0	182	1034	0.30637	0	131	823	0.205647	0	215	728	0.181909	0	155	723	0.281323	0	194	650	0.252918	0	137
PVP01_1425700	1147	0.339852	0	183	330	0.0977778	0	377	1539	0.384558	0	112	323	0.0807096	0	316	1183	0.460311	0	101	311	0.121012	0	268
PVP01_1260100	1143	0.338667	0	184	0	0	0	0	913	0.228136	0	193	0	0	0	0	916	0.35642	0	149	124	0.048249	0	392
PVP01_0317800	1142	0.33837	0	185	1119	0.331556	0	115	755	0.188656	0	243	728	0.181909	0	155	585	0.227626	0	236	580	0.225681	0	154
PVP01_1244500	1142	0.33837	0	185	1146	0.339556	0	109	685	0.171164	0	267	689	0.172164	0	167	609	0.236965	0	228	613	0.238521	0	143
PVP01_1412600	1142	0.33837	0	185	1021	0.302519	0	133	657	0.164168	0	278	530	0.132434	0	217	540	0.210117	0	259	452	0.175875	0	196
PVP01_1268100	1137	0.336889	0	186	916	0.271407	0	152	1217	0.304098	0	145	1071	0.267616	0	100	902	0.350973	0	155	774	0.301167	0	113
PVP01_1464000	1125	0.333333	0	187	409	0.121185	0	335	914	0.228386	0	192	357	0.0892054	0	296	725	0.282101	0	193	300	0.116732	0	274
PVP01_1211700	1123	0.332741	0	188	0	0	0	0	1317	0.329085	0	132	0	0	0	0	948	0.368872	0	141	0	0	0	0
PVP01_1126400	1120	0.331852	0	189	1098	0.325333	0	118	555	0.138681	0	310	542	0.135432	0	210	359	0.139689	0	337	352	0.136965	0	243
PVP01_1236500	1119	0.331556	0	190	1004	0.297481	0	137	715	0.178661	0	255	672	0.167916	0	172	559	0.21751	0	250	502	0.195331	0	179
PVP01_0112100	1110	0.328889	0	191	377	0.111704	0	350	944	0.235882	0	185	419	0.104698	0	259	984	0.382879	0	134	356	0.138521	0	242
PVP01_1347000	1107	0.328	0	192	433	0.128296	0	322	1301	0.325087	0	137	0	0	0	0	788	0.306615	0	177	273	0.106226	0	291
PVP01_0407400	1102	0.326519	0	193	984	0.291556	0	139	791	0.197651	0	223	620	0.154923	0	185	644	0.250584	0	216	548	0.21323	0	163
PVP01_1425900	1100	0.325926	0	194	986	0.292148	0	138	1100	0.274863	0	165	929	0.232134	0	115	727	0.282879	0	192	640	0.249027	0	139
PVP01_1301900	1098	0.325333	0	195	830	0.245926	0	176	675	0.168666	0	271	556	0.138931	0	204	586	0.228016	0	235	474	0.184436	0	192
PVP01_1325300	1097	0.325037	0	196	894	0.264889	0	156	866	0.216392	0	201	644	0.16092	0	179	614	0.238911	0	225	438	0.170428	0	204
PVP01_0527800	1093	0.323852	0	197	1094	0.324148	0	119	758	0.189405	0	240	764	0.190905	0	145	542	0.210895	0	257	542	0.210895	0	167
PVP01_0609300	1092	0.323556	0	198	837	0.248	0	172	889	0.222139	0	196	716	0.178911	0	157	888	0.345525	0	158	683	0.265759	0	131
PVP01_1256300	1092	0.323556	0	198	1052	0.311704	0	126	338	0.0844578	0	442	325	0.0812094	0	315	289	0.112451	0	380	279	0.10856	0	287
PVP01_0906600	1087	0.322074	0	199	813	0.240889	0	179	731	0.182659	0	249	418	0.104448	0	260	355	0.138132	0	339	211	0.0821012	0	335
PVP01_1207300	1085	0.321481	0	200	840	0.248889	0	171	810	0.202399	0	219	518	0.129435	0	222	835	0.324903	0	167	593	0.230739	0	149
PVP01_1342900	1081	0.320296	0	201	1050	0.311111	0	127	1147	0.286607	0	156	1136	0.283858	0	95	791	0.307782	0	176	772	0.300389	0	114
PVP01_0712200	1080	0.32	0	202	911	0.269926	0	153	1304	0.325837	0	136	879	0.21964	0	121	1795	0.698444	0	57	1379	0.536576	0	54
PVP01_0508100	1076	0.318815	0	203	851	0.252148	0	168	824	0.205897	0	214	542	0.135432	0	210	644	0.250584	0	216	488	0.189883	0	184
PVP01_0114800	1070	0.317037	0	204	773	0.229037	0	192	924	0.230885	0	191	570	0.142429	0	203	767	0.298444	0	184	493	0.191829	0	183
PVP01_0947200	1061	0.31437	0	205	868	0.257185	0	162	857	0.214143	0	204	606	0.151424	0	190	689	0.268093	0	203	562	0.218677	0	157
PVP01_1427900	1060	0.314074	0	206	1064	0.315259	0	124	790	0.197401	0	224	806	0.201399	0	134	1112	0.432685	0	112	1118	0.435019	0	69
PVP01_0920300	1055	0.312593	0	207	911	0.269926	0	153	930	0.232384	0	188	813	0.203148	0	131	622	0.242023	0	221	506	0.196887	0	176
PVP01_0927100	1054	0.312296	0	208	934	0.276741	0	147	1461	0.365067	0	119	1370	0.342329	0	76	704	0.27393	0	199	664	0.258366	0	134
PVP01_1112500	1054	0.312296	0	208	449	0.133037	0	313	1308	0.326837	0	135	297	0.0742129	0	331	737	0.28677	0	190	282	0.109728	0	285
PVP01_1132700	1052	0.311704	0	209	1057	0.313185	0	125	801	0.20015	0	221	808	0.201899	0	133	830	0.322957	0	168	832	0.323735	0	99
PVP01_0612400	1051	0.311407	0	210	555	0.164444	0	265	770	0.192404	0	233	275	0.0687156	0	347	523	0.203502	0	266	0	0	0	0
PVP01_1326500	1048	0.310519	0	211	1041	0.308444	0	129	877	0.21914	0	200	863	0.215642	0	124	712	0.277043	0	198	703	0.273541	0	127
PVP01_0308000	1045	0.30963	0	212	1049	0.310815	0	128	659	0.164668	0	277	664	0.165917	0	173	1135	0.441634	0	108	1139	0.443191	0	67
PVP01_1311600	1045	0.30963	0	212	897	0.265778	0	155	1207	0.301599	0	149	1101	0.275112	0	98	675	0.262646	0	207	581	0.22607	0	153
PVP01_1415300	1033	0.306074	0	213	615	0.182222	0	244	1240	0.309845	0	141	817	0.204148	0	130	806	0.313619	0	172	558	0.217121	0	160
PVP01_1212700	1030	0.305185	0	214	904	0.267852	0	154	1198	0.29935	0	151	1031	0.257621	0	106	903	0.351362	0	154	760	0.29572	0	118
PVP01_1438000	1027	0.304296	0	215	1029	0.304889	0	132	816	0.203898	0	217	819	0.204648	0	129	561	0.218288	0	249	561	0.218288	0	158
PVP01_0926700	1025	0.303704	0	216	1010	0.299259	0	136	1047	0.261619	0	168	1050	0.262369	0	103	874	0.340078	0	161	872	0.3393	0	94
PVP01_1338000	1023	0.303111	0	217	482	0.142815	0	300	552	0.137931	0	312	269	0.0672164	0	352	423	0.164591	0	306	0	0	0	0
PVP01_0307800	1019	0.301926	0	218	688	0.203852	0	221	889	0.222139	0	196	607	0.151674	0	189	582	0.226459	0	237	380	0.14786	0	230
PVP01_0614800	1018	0.30163	0	219	1021	0.302519	0	133	700	0.174913	0	261	702	0.175412	0	163	641	0.249416	0	218	641	0.249416	0	138
PVP01_1124800	1015	0.300741	0	220	0	0	0	0	711	0.177661	0	257	0	0	0	0	556	0.216342	0	252	0	0	0	0
PVP01_0920800	1010	0.299259	0	221	238	0.0705185	0	440	813	0.203148	0	218	0	0	0	0	703	0.273541	0	200	0	0	0	0
PVP01_1206600	1010	0.299259	0	221	703	0.208296	0	214	959	0.23963	0	182	777	0.194153	0	143	642	0.249805	0	217	479	0.186381	0	190
PVP01_0943000	1008	0.298667	0	222	750	0.222222	0	199	699	0.174663	0	262	473	0.118191	0	239	577	0.224514	0	240	432	0.168093	0	207
PVP01_1437200	1001	0.296593	0	223	793	0.234963	0	184	768	0.191904	0	235	590	0.147426	0	195	614	0.238911	0	225	485	0.188716	0	186
PVP01_1224800	986	0.292148	0	224	872	0.25837	0	161	834	0.208396	0	210	706	0.176412	0	162	800	0.311284	0	174	712	0.277043	0	125
PVP01_0115600	985	0.291852	0	225	632	0.187259	0	237	714	0.178411	0	256	395	0.0987007	0	274	571	0.222179	0	244	338	0.131518	0	248
PVP01_1456200	981	0.290667	0	226	0	0	0	0	960	0.23988	0	181	655	0.163668	0	176	718	0.279377	0	197	424	0.164981	0	210
PVP01_1426100	978	0.289778	0	227	372	0.110222	0	353	641	0.16017	0	281	311	0.0777111	0	323	604	0.235019	0	230	243	0.0945525	0	316
PVP01_0206700	972	0.288	0	228	975	0.288889	0	141	527	0.131684	0	328	533	0.133183	0	215	530	0.206226	0	263	530	0.206226	0	172
PVP01_0834900	969	0.287111	0	229	795	0.235556	0	183	267	0.0667166	0	494	189	0.0472264	0	408	NA	NA	NA	NA	NA	NA	NA	NA
PVP01_0705100	968	0.286815	0	230	397	0.11763	0	339	689	0.172164	0	263	290	0.0724638	0	337	554	0.215564	0	253	186	0.0723735	0	352
PVP01_1405800	966	0.286222	0	231	875	0.259259	0	159	708	0.176912	0	258	553	0.138181	0	205	487	0.189494	0	277	416	0.161868	0	213
PVP01_0303800	965	0.285926	0	232	969	0.287111	0	142	741	0.185157	0	245	744	0.185907	0	149	744	0.289494	0	189	744	0.289494	0	122
PVP01_0837700	963	0.285333	0	233	703	0.208296	0	214	609	0.152174	0	293	397	0.0992004	0	272	621	0.241634	0	222	412	0.160311	0	216
PVP01_0526700	960	0.284444	0	234	419	0.124148	0	328	577	0.144178	0	304	299	0.0747126	0	329	329	0.128016	0	353	0	0	0	0
PVP01_1227100	960	0.284444	0	234	960	0.284444	0	143	611	0.152674	0	292	620	0.154923	0	185	574	0.223346	0	242	576	0.224125	0	155
PVP01_1331300	960	0.284444	0	234	856	0.25363	0	166	810	0.202399	0	219	547	0.136682	0	208	614	0.238911	0	225	503	0.19572	0	178
PVP01_0806500	958	0.283852	0	235	491	0.145481	0	296	632	0.157921	0	286	257	0.0642179	0	361	533	0.207393	0	262	264	0.102724	0	298
PVP01_0921000	948	0.280889	0	236	0	0	0	0	928	0.231884	0	189	0	0	0	0	520	0.202335	0	267	0	0	0	0
PVP01_1226000	948	0.280889	0	236	713	0.211259	0	209	848	0.211894	0	206	523	0.130685	0	221	600	0.233463	0	231	387	0.150584	0	225
PVP01_1440200	937	0.27763	0	237	0	0	0	0	847	0.211644	0	207	0	0	0	0	596	0.231907	0	234	0	0	0	0
PVP01_0621300	935	0.277037	0	238	694	0.20563	0	218	758	0.189405	0	240	451	0.112694	0	247	571	0.222179	0	244	385	0.149805	0	227
PVP01_1143800	935	0.277037	0	238	0	0	0	0	771	0.192654	0	232	150	0.0374813	0	438	638	0.248249	0	219	0	0	0	0
PVP01_1431800	935	0.277037	0	238	0	0	0	0	1002	0.250375	0	175	0	0	0	0	558	0.217121	0	251	85	0.0330739	0	416
PVP01_1261600	933	0.276444	0	239	832	0.246519	0	174	889	0.222139	0	196	693	0.173163	0	165	577	0.224514	0	240	478	0.185992	0	191
PVP01_0721200	925	0.274074	0	240	628	0.186074	0	238	760	0.189905	0	239	601	0.150175	0	193	498	0.193774	0	273	380	0.14786	0	230
PVP01_1457000	924	0.273778	0	241	250	0.0740741	0	433	1237	0.309095	0	142	210	0.0524738	0	392	938	0.364981	0	145	0	0	0	0
PVP01_1441600	922	0.273185	0	242	926	0.27437	0	148	437	0.109195	0	376	438	0.109445	0	253	336	0.130739	0	349	336	0.130739	0	250
PVP01_1271000	918	0.272	0	243	920	0.272593	0	150	606	0.151424	0	295	611	0.152674	0	187	443	0.172374	0	294	445	0.173152	0	200
PVP01_1218600	916	0.271407	0	244	534	0.158222	0	274	852	0.212894	0	205	710	0.177411	0	161	782	0.30428	0	180	548	0.21323	0	163
PVP01_1332400	914	0.270815	0	245	860	0.254815	0	164	865	0.216142	0	202	798	0.1994	0	137	968	0.376654	0	137	936	0.364202	0	87
PVP01_1445900	914	0.270815	0	245	387	0.114667	0	345	717	0.17916	0	253	331	0.0827086	0	310	598	0.232685	0	233	251	0.0976654	0	309
PVP01_0939500	909	0.269333	0	246	735	0.217778	0	203	537	0.134183	0	319	355	0.0887056	0	298	380	0.14786	0	325	263	0.102335	0	299
PVP01_0907900	903	0.267556	0	247	649	0.192296	0	232	880	0.21989	0	199	588	0.146927	0	196	494	0.192218	0	274	0	0	0	0
PVP01_0720700	895	0.265185	0	248	897	0.265778	0	155	781	0.195152	0	229	785	0.196152	0	141	506	0.196887	0	270	506	0.196887	0	176
PVP01_1456000	894	0.264889	0	249	0	0	0	0	525	0.131184	0	329	0	0	0	0	308	0.119844	0	366	0	0	0	0
PVP01_0414200	891	0.264	0	250	791	0.23437	0	185	553	0.138181	0	311	478	0.11944	0	236	599	0.233074	0	232	503	0.19572	0	178
PVP01_0407500	889	0.263407	0	251	601	0.178074	0	248	999	0.249625	0	176	673	0.168166	0	171	660	0.256809	0	212	408	0.158755	0	219
PVP01_1308000	887	0.262815	0	252	692	0.205037	0	219	509	0.127186	0	335	392	0.097951	0	276	379	0.147471	0	326	307	0.119455	0	272
PVP01_1129300	886	0.262519	0	253	536	0.158815	0	273	987	0.246627	0	178	452	0.112944	0	246	847	0.329572	0	165	420	0.163424	0	212
PVP01_1142400	886	0.262519	0	253	853	0.252741	0	167	546	0.136432	0	315	495	0.123688	0	229	360	0.140078	0	336	349	0.135798	0	245
PVP01_0504400	876	0.259556	0	254	753	0.223111	0	198	731	0.182659	0	249	515	0.128686	0	223	538	0.209339	0	261	456	0.177432	0	195
PVP01_1325800	876	0.259556	0	254	867	0.256889	0	163	984	0.245877	0	179	967	0.241629	0	112	608	0.236576	0	229	601	0.233852	0	147
PVP01_1022500	874	0.258963	0	255	755	0.223704	0	197	679	0.169665	0	268	542	0.135432	0	210	505	0.196498	0	271	397	0.154475	0	221
PVP01_1341400	873	0.258667	0	256	493	0.146074	0	294	570	0.142429	0	306	353	0.0882059	0	299	380	0.14786	0	325	0	0	0	0
PVP01_1437800	869	0.257481	0	257	804	0.238222	0	180	688	0.171914	0	264	608	0.151924	0	188	425	0.16537	0	305	387	0.150584	0	225
PVP01_0521400	868	0.257185	0	258	780	0.231111	0	190	616	0.153923	0	291	536	0.133933	0	214	839	0.326459	0	166	754	0.293385	0	120
PVP01_1221600	868	0.257185	0	258	868	0.257185	0	162	770	0.192404	0	233	774	0.193403	0	144	567	0.220623	0	247	569	0.221401	0	156
PVP01_0418000	867	0.256889	0	259	874	0.258963	0	160	617	0.154173	0	290	633	0.158171	0	183	810	0.315175	0	171	817	0.317899	0	103
PVP01_0923600	857	0.253926	0	260	697	0.206519	0	217	532	0.132934	0	323	445	0.111194	0	249	539	0.209728	0	260	441	0.171595	0	203
PVP01_1437000	857	0.253926	0	260	441	0.130667	0	318	707	0.176662	0	259	433	0.108196	0	256	516	0.200778	0	268	296	0.115175	0	277
PVP01_0303300	855	0.253333	0	261	524	0.155259	0	279	673	0.168166	0	273	523	0.130685	0	221	604	0.235019	0	230	421	0.163813	0	211
PVP01_1455000	852	0.252444	0	262	834	0.247111	0	173	727	0.181659	0	250	712	0.177911	0	159	437	0.170039	0	298	429	0.166926	0	208
PVP01_0609100	851	0.252148	0	263	709	0.210074	0	211	460	0.114943	0	365	383	0.0957021	0	282	332	0.129183	0	351	265	0.103113	0	297
PVP01_0526400	848	0.251259	0	264	0	0	0	0	762	0.190405	0	237	0	0	0	0	652	0.253696	0	213	0	0	0	0
PVP01_0316000	842	0.249481	0	265	199	0.058963	0	468	888	0.221889	0	197	407	0.101699	0	266	662	0.257588	0	211	0	0	0	0
PVP01_0823000	836	0.247704	0	266	844	0.250074	0	169	597	0.149175	0	298	604	0.150925	0	191	620	0.241245	0	223	629	0.244747	0	141
PVP01_1435200	836	0.247704	0	266	818	0.24237	0	178	762	0.190405	0	237	739	0.184658	0	153	421	0.163813	0	307	412	0.160311	0	216
PVP01_0703500	829	0.24563	0	267	638	0.189037	0	236	640	0.15992	0	282	528	0.131934	0	219	441	0.171595	0	295	314	0.122179	0	266
PVP01_1450600	823	0.243852	0	268	663	0.196444	0	227	495	0.123688	0	344	391	0.0977012	0	277	335	0.13035	0	350	281	0.109339	0	286
PVP01_1122200	821	0.243259	0	269	741	0.219556	0	201	474	0.118441	0	357	403	0.1007	0	269	446	0.173541	0	292	393	0.152918	0	224
PVP01_1267500	817	0.242074	0	270	0	0	0	0	605	0.151174	0	296	0	0	0	0	457	0.177821	0	288	0	0	0	0
PVP01_1226900	809	0.239704	0	271	788	0.233481	0	186	592	0.147926	0	299	576	0.143928	0	199	596	0.231907	0	234	591	0.229961	0	150
PVP01_0718200	802	0.23763	0	272	781	0.231407	0	189	631	0.157671	0	287	602	0.150425	0	192	337	0.131128	0	348	321	0.124903	0	261
PVP01_0520500	801	0.237333	0	273	750	0.222222	0	199	960	0.23988	0	181	917	0.229135	0	116	580	0.225681	0	238	560	0.217899	0	159
PVP01_0903900	800	0.237037	0	274	757	0.224296	0	196	462	0.115442	0	363	427	0.106697	0	258	579	0.225292	0	239	544	0.211673	0	165
PVP01_0917900	799	0.236741	0	275	0	0	0	0	785	0.196152	0	226	0	0	0	0	542	0.210895	0	257	0	0	0	0
PVP01_1027500	793	0.234963	0	276	800	0.237037	0	181	353	0.0882059	0	434	352	0.087956	0	300	332	0.129183	0	351	332	0.129183	0	253
PVP01_0215200	789	0.233778	0	277	771	0.228444	0	193	359	0.0897051	0	429	339	0.0847076	0	305	375	0.145914	0	328	366	0.142412	0	239
PVP01_1307900	787	0.233185	0	278	469	0.138963	0	303	687	0.171664	0	265	415	0.103698	0	261	576	0.224125	0	241	330	0.128405	0	254
PVP01_0733200	784	0.232296	0	279	796	0.235852	0	182	733	0.183158	0	248	741	0.185157	0	151	401	0.156031	0	314	412	0.160311	0	216
PVP01_0415700	780	0.231111	0	280	701	0.207704	0	216	399	0.0997002	0	401	288	0.071964	0	339	345	0.134241	0	345	269	0.104669	0	293
PVP01_1208500	779	0.230815	0	281	238	0.0705185	0	440	364	0.0909545	0	425	0	0	0	0	440	0.171206	0	296	0	0	0	0
PVP01_0905700	775	0.22963	0	282	506	0.149926	0	286	533	0.133183	0	322	303	0.0757121	0	326	484	0.188327	0	278	311	0.121012	0	268
PVP01_1261400	773	0.229037	0	283	466	0.138074	0	306	506	0.126437	0	338	233	0.0582209	0	377	371	0.144358	0	330	199	0.0774319	0	344
PVP01_1215200	758	0.224593	0	284	767	0.227259	0	194	507	0.126687	0	337	508	0.126937	0	224	541	0.210506	0	258	544	0.211673	0	165
PVP01_1232800	758	0.224593	0	284	241	0.0714074	0	438	834	0.208396	0	210	337	0.0842079	0	307	360	0.140078	0	336	0	0	0	0
PVP01_0105700	752	0.222815	0	285	299	0.0885926	0	397	367	0.0917041	0	422	131	0.0327336	0	454	245	0.0953307	0	416	89	0.0346303	0	413
PVP01_1103500	752	0.222815	0	285	587	0.173926	0	256	688	0.171914	0	264	571	0.142679	0	202	527	0.205058	0	264	408	0.158755	0	219
PVP01_1255300	744	0.220444	0	286	639	0.189333	0	235	365	0.0912044	0	424	301	0.0752124	0	327	345	0.134241	0	345	285	0.110895	0	284
PVP01_1420300	743	0.220148	0	287	744	0.220444	0	200	437	0.109195	0	376	431	0.107696	0	257	416	0.161868	0	308	413	0.1607	0	215
PVP01_1246800	741	0.219556	0	288	248	0.0734815	0	434	770	0.192404	0	233	393	0.0982009	0	275	431	0.167704	0	301	173	0.0673152	0	361
PVP01_0917300	737	0.21837	0	289	0	0	0	0	1021	0.255122	0	173	0	0	0	0	926	0.360311	0	146	371	0.144358	0	236
PVP01_0804200	735	0.217778	0	290	522	0.154667	0	280	522	0.130435	0	330	419	0.104698	0	259	383	0.149027	0	323	0	0	0	0
PVP01_0716500	732	0.216889	0	291	0	0	0	0	726	0.181409	0	251	0	0	0	0	492	0.19144	0	275	0	0	0	0
PVP01_1427200	731	0.216593	0	292	669	0.198222	0	224	403	0.1007	0	398	349	0.0872064	0	302	303	0.117899	0	369	253	0.0984436	0	307
PVP01_1465600	731	0.216593	0	292	737	0.21837	0	202	706	0.176412	0	260	713	0.178161	0	158	610	0.237354	0	227	614	0.238911	0	142
PVP01_1315200	730	0.216296	0	293	601	0.178074	0	248	539	0.134683	0	318	454	0.113443	0	244	376	0.146304	0	327	320	0.124514	0	262
PVP01_0810100	728	0.215704	0	294	718	0.212741	0	208	588	0.146927	0	301	574	0.143428	0	200	464	0.180545	0	284	449	0.174708	0	197
PVP01_1218400	724	0.214519	0	295	723	0.214222	0	205	417	0.104198	0	388	419	0.104698	0	259	167	0.0649805	0	485	170	0.0661479	0	364
PVP01_1341200	724	0.214519	0	295	440	0.13037	0	319	669	0.167166	0	276	536	0.133933	0	214	431	0.167704	0	301	305	0.118677	0	273
PVP01_0212900	723	0.214222	0	296	619	0.183407	0	241	832	0.207896	0	211	642	0.16042	0	180	549	0.213619	0	255	462	0.179767	0	193
PVP01_1454700	721	0.21363	0	297	652	0.193185	0	231	1106	0.276362	0	164	1033	0.258121	0	105	770	0.299611	0	182	696	0.270817	0	129
PVP01_1447500	719	0.213037	0	298	391	0.115852	0	342	250	0.0624688	0	509	0	0	0	0	476	0.185214	0	281	243	0.0945525	0	316
PVP01_0509500	718	0.212741	0	299	588	0.174222	0	255	394	0.0984508	0	405	323	0.0807096	0	316	286	0.111284	0	383	234	0.0910506	0	322
PVP01_1330100	718	0.212741	0	299	721	0.21363	0	206	1552	0.387806	0	109	1564	0.390805	0	66	1046	0.407004	0	124	1049	0.408171	0	73
PVP01_1342500	718	0.212741	0	299	720	0.213333	0	207	401	0.1002	0	400	404	0.10095	0	268	261	0.101556	0	402	261	0.101556	0	301
PVP01_0521100	717	0.212444	0	300	600	0.177778	0	249	407	0.101699	0	395	314	0.0784608	0	320	414	0.161089	0	309	329	0.128016	0	255
PVP01_1013800	717	0.212444	0	300	706	0.209185	0	213	517	0.129185	0	333	518	0.129435	0	222	580	0.225681	0	238	580	0.225681	0	154
PVP01_0204500	713	0.211259	0	301	313	0.0927407	0	388	527	0.131684	0	328	268	0.0669665	0	353	481	0.18716	0	279	214	0.0832685	0	333
PVP01_1317300	711	0.210667	0	302	285	0.0844444	0	409	361	0.0902049	0	427	94	0.0234883	0	481	276	0.107393	0	391	96	0.0373541	0	410
PVP01_0720500	709	0.210074	0	303	711	0.210667	0	210	473	0.118191	0	358	480	0.11994	0	235	351	0.136576	0	341	351	0.136576	0	244
PVP01_1431700	700	0.207407	0	304	270	0.08	0	420	634	0.158421	0	284	196	0.0489755	0	402	439	0.170817	0	297	0	0	0	0
PVP01_1202900	699	0.207111	0	305	0	0	0	0	572	0.142929	0	305	290	0.0724638	0	337	399	0.155253	0	315	0	0	0	0
PVP01_1105100	698	0.206815	0	306	664	0.196741	0	226	413	0.103198	0	390	386	0.0964518	0	280	392	0.152529	0	318	361	0.140467	0	240
PVP01_1253300	696	0.206222	0	307	621	0.184	0	240	842	0.210395	0	209	806	0.201399	0	134	509	0.198054	0	269	483	0.187938	0	187
PVP01_1449800	694	0.20563	0	308	0	0	0	0	531	0.132684	0	324	217	0.0542229	0	386	325	0.126459	0	356	0	0	0	0
PVP01_0814600	688	0.203852	0	309	590	0.174815	0	254	375	0.0937031	0	416	292	0.0729635	0	335	287	0.111673	0	382	250	0.0972763	0	310
PVP01_1462800	688	0.203852	0	309	346	0.102519	0	367	624	0.155922	0	288	0	0	0	0	426	0.165759	0	304	0	0	0	0
PVP01_1122700	687	0.203556	0	310	690	0.204444	0	220	372	0.0929535	0	419	373	0.0932034	0	286	399	0.155253	0	315	403	0.156809	0	220
PVP01_0421300	683	0.20237	0	311	416	0.123259	0	329	782	0.195402	0	228	0	0	0	0	401	0.156031	0	314	171	0.066537	0	363
PVP01_1331700	683	0.20237	0	311	612	0.181333	0	245	390	0.0974513	0	408	307	0.0767116	0	325	317	0.123346	0	361	253	0.0984436	0	307
PVP01_1014900	682	0.202074	0	312	610	0.180741	0	246	465	0.116192	0	361	431	0.107696	0	257	332	0.129183	0	351	300	0.116732	0	274
PVP01_1105500	681	0.201778	0	313	660	0.195556	0	229	817	0.204148	0	216	801	0.20015	0	136	414	0.161089	0	309	410	0.159533	0	218
PVP01_1416800	680	0.201481	0	314	0	0	0	0	618	0.154423	0	289	0	0	0	0	576	0.224125	0	241	0	0	0	0
PVP01_0529400	678	0.200889	0	315	274	0.0811852	0	419	389	0.0972014	0	409	158	0.0394803	0	432	297	0.115564	0	373	117	0.0455253	0	399
PVP01_1125500	678	0.200889	0	315	465	0.137778	0	307	562	0.14043	0	307	393	0.0982009	0	275	399	0.155253	0	315	274	0.106615	0	290
PVP01_1419200	678	0.200889	0	315	685	0.202963	0	222	386	0.0964518	0	411	387	0.0967017	0	279	425	0.16537	0	305	426	0.165759	0	209
PVP01_0908800	673	0.199407	0	316	588	0.174222	0	255	498	0.124438	0	342	387	0.0967017	0	279	397	0.154475	0	316	337	0.131128	0	249
PVP01_0945600	672	0.199111	0	317	0	0	0	0	581	0.145177	0	303	0	0	0	0	503	0.19572	0	272	0	0	0	0
PVP01_1459000	672	0.199111	0	317	539	0.159704	0	272	530	0.132434	0	325	383	0.0957021	0	282	314	0.122179	0	363	0	0	0	0
PVP01_0307900	668	0.197926	0	318	672	0.199111	0	223	399	0.0997002	0	401	412	0.102949	0	264	451	0.175486	0	290	456	0.177432	0	195
PVP01_0418200	668	0.197926	0	318	328	0.0971852	0	379	549	0.137181	0	314	311	0.0777111	0	323	359	0.139689	0	337	0	0	0	0
PVP01_1110300	666	0.197333	0	319	667	0.19763	0	225	357	0.0892054	0	430	356	0.0889555	0	297	325	0.126459	0	356	326	0.126848	0	258
PVP01_1225700	666	0.197333	0	319	0	0	0	0	356	0.0889555	0	431	0	0	0	0	305	0.118677	0	367	60	0.0233463	0	437
PVP01_0205700	662	0.196148	0	320	0	0	0	0	NA	NA	NA	NA	NA	NA	NA	NA	303	0.117899	0	369	0	0	0	0
PVP01_1260300	661	0.195852	0	321	472	0.139852	0	302	405	0.101199	0	397	211	0.0527236	0	391	304	0.118288	0	368	0	0	0	0
PVP01_1262700	661	0.195852	0	321	595	0.176296	0	252	671	0.167666	0	275	606	0.151424	0	190	445	0.173152	0	293	384	0.149416	0	228
PVP01_0315200	660	0.195556	0	322	606	0.179556	0	247	477	0.11919	0	355	434	0.108446	0	255	286	0.111284	0	383	262	0.101946	0	300
PVP01_0713000	657	0.194667	0	323	0	0	0	0	804	0.2009	0	220	0	0	0	0	467	0.181712	0	283	0	0	0	0
PVP01_1203900	656	0.19437	0	324	489	0.144889	0	298	597	0.149175	0	298	373	0.0932034	0	286	462	0.179767	0	285	309	0.120233	0	270
PVP01_0421000	653	0.193481	0	325	0	0	0	0	487	0.121689	0	348	184	0.045977	0	412	468	0.182101	0	282	200	0.077821	0	343
PVP01_0836900	652	0.193185	0	326	0	0	0	0	450	0.112444	0	369	0	0	0	0	359	0.139689	0	337	0	0	0	0
PVP01_1263200	652	0.193185	0	326	448	0.132741	0	314	443	0.110695	0	373	242	0.0604698	0	371	239	0.0929961	0	422	128	0.0498055	0	388
PVP01_0708700	649	0.192296	0	327	396	0.117333	0	340	486	0.121439	0	349	0	0	0	0	267	0.103891	0	398	0	0	0	0
PVP01_1269300	647	0.191704	0	328	512	0.151704	0	284	461	0.115192	0	364	303	0.0757121	0	326	367	0.142802	0	333	251	0.0976654	0	309
PVP01_0618800	643	0.190519	0	329	0	0	0	0	429	0.107196	0	380	0	0	0	0	320	0.124514	0	360	0	0	0	0
PVP01_0713400	640	0.18963	0	330	632	0.187259	0	237	243	0.0607196	0	515	229	0.0572214	0	380	432	0.168093	0	300	395	0.153697	0	223
PVP01_0819100	637	0.188741	0	331	581	0.172148	0	258	360	0.089955	0	428	319	0.0797101	0	319	339	0.131907	0	347	285	0.110895	0	284
PVP01_1468200	636	0.188444	0	332	0	0	0	0	550	0.137431	0	313	313	0.0782109	0	321	452	0.175875	0	289	275	0.107004	0	289
PVP01_1211900	632	0.187259	0	333	442	0.130963	0	317	464	0.115942	0	362	300	0.0749625	0	328	346	0.13463	0	344	245	0.0953307	0	314
PVP01_1306200	628	0.186074	0	334	582	0.172444	0	257	500	0.124938	0	340	455	0.113693	0	243	294	0.114397	0	376	250	0.0972763	0	310
PVP01_0118300	624	0.184889	0	335	517	0.153185	0	282	334	0.0834583	0	445	264	0.065967	0	357	322	0.125292	0	359	244	0.0949416	0	315
PVP01_0813900	623	0.184593	0	336	497	0.147259	0	291	633	0.158171	0	285	409	0.102199	0	265	680	0.264591	0	205	486	0.189105	0	185
PVP01_1308200	623	0.184593	0	336	311	0.0921481	0	389	438	0.109445	0	375	250	0.0624688	0	365	352	0.136965	0	340	188	0.0731518	0	350
PVP01_0315800	622	0.184296	0	337	618	0.183111	0	242	375	0.0937031	0	416	372	0.0929535	0	287	291	0.11323	0	378	290	0.11284	0	281
PVP01_0947700	622	0.184296	0	337	618	0.183111	0	242	371	0.0927036	0	420	369	0.0922039	0	289	242	0.0941634	0	419	243	0.0945525	0	316
PVP01_1124500	622	0.184296	0	337	530	0.157037	0	276	637	0.15917	0	283	552	0.137931	0	206	579	0.225292	0	239	504	0.196109	0	177
PVP01_1228500	617	0.182815	0	338	0	0	0	0	482	0.12044	0	352	0	0	0	0	549	0.213619	0	255	0	0	0	0
PVP01_1305500	617	0.182815	0	338	610	0.180741	0	246	428	0.106947	0	381	403	0.1007	0	269	395	0.153697	0	317	382	0.148638	0	229
PVP01_0713300	613	0.18163	0	339	391	0.115852	0	342	383	0.0957021	0	413	208	0.051974	0	393	413	0.1607	0	310	0	0	0	0
PVP01_0532300	610	0.180741	0	340	643	0.190519	0	234	500	0.124938	0	340	544	0.135932	0	209	413	0.1607	0	310	441	0.171595	0	203
PVP01_0701700	605	0.179259	0	341	437	0.129481	0	321	517	0.129185	0	333	314	0.0784608	0	320	381	0.148249	0	324	262	0.101946	0	300
PVP01_1265200	604	0.178963	0	342	505	0.14963	0	287	474	0.118441	0	357	319	0.0797101	0	319	370	0.143969	0	331	289	0.112451	0	282
PVP01_0316100	603	0.178667	0	343	543	0.160889	0	270	453	0.113193	0	367	365	0.0912044	0	292	341	0.132685	0	346	324	0.12607	0	260
PVP01_0705500	603	0.178667	0	343	0	0	0	0	NA	NA	NA	NA	NA	NA	NA	NA	NA	NA	NA	NA	NA	NA	NA	NA
PVP01_0409400	596	0.176593	0	344	472	0.139852	0	302	447	0.111694	0	371	359	0.0897051	0	294	347	0.135019	0	343	276	0.107393	0	288
PVP01_1460600	596	0.176593	0	344	468	0.138667	0	304	1039	0.25962	0	171	906	0.226387	0	119	637	0.24786	0	220	532	0.207004	0	171
PVP01_0618200	595	0.176296	0	345	528	0.156444	0	277	415	0.103698	0	389	378	0.0944528	0	284	389	0.151362	0	319	342	0.133074	0	246
PVP01_1023500	595	0.176296	0	345	468	0.138667	0	304	359	0.0897051	0	429	253	0.0632184	0	363	355	0.138132	0	339	264	0.102724	0	298
PVP01_1430400	595	0.176296	0	345	540	0.16	0	271	331	0.0827086	0	448	298	0.0744628	0	330	289	0.112451	0	380	260	0.101167	0	302
PVP01_0937400	594	0.176	0	346	337	0.0998519	0	373	450	0.112444	0	369	264	0.065967	0	357	346	0.13463	0	344	163	0.0634241	0	369
PVP01_1004000	594	0.176	0	346	201	0.0595556	0	466	632	0.157921	0	286	0	0	0	0	427	0.166148	0	303	124	0.048249	0	392
PVP01_1134900	593	0.175704	0	347	553	0.163852	0	266	270	0.0674663	0	491	229	0.0572214	0	380	289	0.112451	0	380	254	0.0988327	0	306
PVP01_1265400	592	0.175407	0	348	594	0.176	0	253	674	0.168416	0	272	682	0.170415	0	168	480	0.18677	0	280	482	0.187549	0	188
PVP01_0920900	591	0.175111	0	349	532	0.15763	0	275	522	0.130435	0	330	487	0.121689	0	230	392	0.152529	0	318	372	0.144747	0	235
PVP01_0922200	591	0.175111	0	349	582	0.172444	0	257	327	0.0817091	0	452	320	0.07996	0	318	450	0.175097	0	291	436	0.16965	0	205
PVP01_1215100	591	0.175111	0	349	501	0.148444	0	288	340	0.0849575	0	441	276	0.0689655	0	346	311	0.121012	0	365	228	0.088716	0	326
PVP01_1238700	588	0.174222	0	350	375	0.111111	0	352	425	0.106197	0	382	205	0.0512244	0	395	297	0.115564	0	373	159	0.0618677	0	371
PVP01_0714700	582	0.172444	0	351	518	0.153481	0	281	374	0.0934533	0	417	325	0.0812094	0	315	314	0.122179	0	363	273	0.106226	0	291
PVP01_1335200	581	0.172148	0	352	492	0.145778	0	295	291	0.0727136	0	476	242	0.0604698	0	371	254	0.0988327	0	408	205	0.0797665	0	340
PVP01_0602200	579	0.171556	0	353	0	0	0	0	520	0.129935	0	331	0	0	0	0	NA	NA	NA	NA	NA	NA	NA	NA
PVP01_1212800	578	0.171259	0	354	566	0.167704	0	260	678	0.169415	0	269	673	0.168166	0	171	622	0.242023	0	221	609	0.236965	0	144
PVP01_1305800	578	0.171259	0	354	549	0.162667	0	268	418	0.104448	0	387	405	0.101199	0	267	282	0.109728	0	386	267	0.103891	0	295
PVP01_0811900	577	0.170963	0	355	0	0	0	0	492	0.122939	0	345	75	0.0187406	0	495	405	0.157588	0	313	103	0.0400778	0	406
PVP01_1139800	575	0.17037	0	356	385	0.114074	0	347	543	0.135682	0	316	327	0.0817091	0	313	369	0.14358	0	332	261	0.101556	0	301
PVP01_0713200	574	0.170074	0	357	0	0	0	0	323	0.0807096	0	455	0	0	0	0	288	0.112062	0	381	0	0	0	0
PVP01_1014800	574	0.170074	0	357	617	0.182815	0	243	406	0.101449	0	396	427	0.106697	0	258	432	0.168093	0	300	448	0.174319	0	198
PVP01_1202400	574	0.170074	0	357	494	0.14637	0	293	686	0.171414	0	266	620	0.154923	0	185	237	0.0922179	0	424	198	0.0770428	0	345
PVP01_0933200	573	0.169778	0	358	480	0.142222	0	301	356	0.0889555	0	431	307	0.0767116	0	325	243	0.0945525	0	418	214	0.0832685	0	333
PVP01_0316300	571	0.169185	0	359	376	0.111407	0	351	330	0.0824588	0	449	0	0	0	0	102	0.0396887	0	540	0	0	0	0
PVP01_1103600	571	0.169185	0	359	0	0	0	0	451	0.112694	0	368	180	0.0449775	0	414	369	0.14358	0	332	171	0.066537	0	363
PVP01_0317700	569	0.168593	0	360	522	0.154667	0	280	470	0.117441	0	360	445	0.111194	0	249	349	0.135798	0	342	314	0.122179	0	266
PVP01_0947600	567	0.168	0	361	569	0.168593	0	259	269	0.0672164	0	492	272	0.067966	0	349	NA	NA	NA	NA	NA	NA	NA	NA
PVP01_0405600	566	0.167704	0	362	517	0.153185	0	282	641	0.16017	0	281	613	0.153173	0	186	570	0.22179	0	245	542	0.210895	0	167
PVP01_0118400	565	0.167407	0	363	532	0.15763	0	275	390	0.0974513	0	408	358	0.0894553	0	295	281	0.109339	0	387	262	0.101946	0	300
PVP01_0921700	563	0.166815	0	364	622	0.184296	0	239	506	0.126437	0	338	531	0.132684	0	216	413	0.1607	0	310	447	0.17393	0	199
PVP01_1005500	563	0.166815	0	364	530	0.157037	0	276	398	0.0994503	0	402	359	0.0897051	0	294	NA	NA	NA	NA	NA	NA	NA	NA
PVP01_1103100	563	0.166815	0	364	536	0.158815	0	273	169	0.0422289	0	574	0	0	0	0	233	0.0906615	0	428	227	0.0883268	0	327
PVP01_1416300	563	0.166815	0	364	565	0.167407	0	261	NA	NA	NA	NA	NA	NA	NA	NA	249	0.0968872	0	413	250	0.0972763	0	310
PVP01_1404900	559	0.16563	0	365	0	0	0	0	525	0.131184	0	329	0	0	0	0	356	0.138521	0	338	0	0	0	0
PVP01_0207300	558	0.165333	0	366	564	0.167111	0	262	325	0.0812094	0	453	339	0.0847076	0	305	233	0.0906615	0	428	237	0.0922179	0	320
PVP01_1208400	558	0.165333	0	366	172	0.050963	0	487	227	0.0567216	0	528	0	0	0	0	314	0.122179	0	363	0	0	0	0
PVP01_0522500	557	0.165037	0	367	0	0	0	0	360	0.089955	0	428	181	0.0452274	0	413	NA	NA	NA	NA	NA	NA	NA	NA
PVP01_1026000	555	0.164444	0	368	267	0.0791111	0	423	481	0.12019	0	353	0	0	0	0	553	0.215175	0	254	258	0.100389	0	304
PVP01_1435700	555	0.164444	0	368	465	0.137778	0	307	473	0.118191	0	358	351	0.0877061	0	301	355	0.138132	0	339	275	0.107004	0	289
PVP01_0615400	552	0.163556	0	369	561	0.166222	0	263	420	0.104948	0	385	435	0.108696	0	254	250	0.0972763	0	412	252	0.0980545	0	308
PVP01_0305200	551	0.163259	0	370	490	0.145185	0	297	826	0.206397	0	213	737	0.184158	0	154	670	0.2607	0	208	613	0.238521	0	143
PVP01_1437400	551	0.163259	0	370	499	0.147852	0	289	411	0.102699	0	392	379	0.0947026	0	283	NA	NA	NA	NA	NA	NA	NA	NA
PVP01_0531800	549	0.162667	0	371	551	0.163259	0	267	536	0.133933	0	320	540	0.134933	0	211	184	0.0715953	0	470	187	0.0727626	0	351
PVP01_1330800	546	0.161778	0	372	548	0.16237	0	269	195	0.0487256	0	550	197	0.0492254	0	401	165	0.0642023	0	487	165	0.0642023	0	367
PVP01_0705900	545	0.161481	0	373	364	0.107852	0	357	448	0.111944	0	370	0	0	0	0	364	0.141634	0	334	0	0	0	0
PVP01_1116800	545	0.161481	0	373	0	0	0	0	333	0.0832084	0	446	0	0	0	0	239	0.0929961	0	422	0	0	0	0
PVP01_1224900	545	0.161481	0	373	345	0.102222	0	368	NA	NA	NA	NA	NA	NA	NA	NA	NA	NA	NA	NA	NA	NA	NA	NA
PVP01_1120300	544	0.161185	0	374	0	0	0	0	436	0.108946	0	377	0	0	0	0	278	0.108171	0	390	0	0	0	0
PVP01_0609400	542	0.160593	0	375	702	0.208	0	215	332	0.0829585	0	447	435	0.108696	0	254	426	0.165759	0	304	538	0.209339	0	169
PVP01_1309300	542	0.160593	0	375	449	0.133037	0	313	560	0.13993	0	308	485	0.121189	0	232	480	0.18677	0	280	414	0.161089	0	214
PVP01_0514700	541	0.160296	0	376	532	0.15763	0	275	351	0.0877061	0	435	329	0.0822089	0	312	249	0.0968872	0	413	228	0.088716	0	326
PVP01_1330900	540	0.16	0	377	465	0.137778	0	307	349	0.0872064	0	436	270	0.0674663	0	351	238	0.092607	0	423	0	0	0	0
PVP01_0203400	534	0.158222	0	378	183	0.0542222	0	479	140	0.0349825	0	597	60	0.0149925	0	506	171	0.066537	0	481	0	0	0	0
PVP01_0728800	533	0.157926	0	379	536	0.158815	0	273	263	0.0657171	0	498	267	0.0667166	0	354	NA	NA	NA	NA	NA	NA	NA	NA
PVP01_1236600	533	0.157926	0	379	495	0.146667	0	292	273	0.0682159	0	489	252	0.0629685	0	364	292	0.113619	0	377	272	0.105837	0	292
PVP01_1423500	533	0.157926	0	379	370	0.10963	0	354	560	0.13993	0	308	441	0.110195	0	251	369	0.14358	0	332	0	0	0	0
PVP01_1206200	532	0.15763	0	380	0	0	0	0	328	0.081959	0	451	254	0.0634683	0	362	312	0.121401	0	364	224	0.0871595	0	329
PVP01_1429400	530	0.157037	0	381	528	0.156444	0	277	332	0.0829585	0	447	331	0.0827086	0	310	379	0.147471	0	326	379	0.147471	0	231
PVP01_1435100	529	0.156741	0	382	0	0	0	0	676	0.168916	0	270	0	0	0	0	406	0.157977	0	312	0	0	0	0
PVP01_0616800	528	0.156444	0	383	0	0	0	0	361	0.0902049	0	427	0	0	0	0	317	0.123346	0	361	0	0	0	0
PVP01_0506100	527	0.156148	0	384	0	0	0	0	367	0.0917041	0	422	215	0.0537231	0	388	253	0.0984436	0	409	164	0.0638132	0	368
PVP01_1456400	524	0.155259	0	385	515	0.152593	0	283	300	0.0749625	0	469	286	0.0714643	0	340	301	0.117121	0	371	297	0.115564	0	276
PVP01_1418300	523	0.154963	0	386	422	0.125037	0	327	528	0.131934	0	327	0	0	0	0	359	0.139689	0	337	0	0	0	0
PVP01_1017600	520	0.154074	0	387	0	0	0	0	497	0.124188	0	343	146	0.0364818	0	442	NA	NA	NA	NA	NA	NA	NA	NA
PVP01_0617600	519	0.153778	0	388	525	0.155556	0	278	483	0.12069	0	351	486	0.121439	0	231	385	0.149805	0	321	386	0.150195	0	226
PVP01_0816100	517	0.153185	0	389	0	0	0	0	557	0.13918	0	309	244	0.0609695	0	370	523	0.203502	0	266	298	0.115953	0	275
PVP01_1022700	515	0.152593	0	390	528	0.156444	0	277	248	0.061969	0	511	253	0.0632184	0	363	221	0.0859922	0	440	225	0.0875486	0	328
PVP01_0942500	511	0.151407	0	391	0	0	0	0	269	0.0672164	0	492	0	0	0	0	1208	0.470039	0	100	538	0.209339	0	169
PVP01_1218000	511	0.151407	0	391	394	0.116741	0	341	584	0.145927	0	302	321	0.0802099	0	317	282	0.109728	0	386	0	0	0	0
PVP01_1454200	511	0.151407	0	391	0	0	0	0	522	0.130435	0	330	0	0	0	0	405	0.157588	0	313	0	0	0	0
PVP01_0309100	508	0.150519	0	392	346	0.102519	0	367	637	0.15917	0	283	462	0.115442	0	242	376	0.146304	0	327	268	0.10428	0	294
PVP01_1304300	504	0.149333	0	393	0	0	0	0	485	0.121189	0	350	0	0	0	0	339	0.131907	0	347	0	0	0	0
PVP01_0509300	503	0.149037	0	394	266	0.0788148	0	424	268	0.0669665	0	493	133	0.0332334	0	452	264	0.102724	0	401	120	0.0466926	0	396
PVP01_0933600	500	0.148148	0	395	279	0.0826667	0	415	1119	0.27961	0	161	831	0.207646	0	126	758	0.294942	0	187	459	0.178599	0	194
PVP01_1123100	498	0.147556	0	396	0	0	0	0	774	0.193403	0	231	529	0.132184	0	218	458	0.17821	0	287	327	0.127237	0	257
PVP01_1321600	498	0.147556	0	396	0	0	0	0	529	0.132184	0	326	0	0	0	0	527	0.205058	0	264	0	0	0	0
PVP01_0928600	495	0.146667	0	397	415	0.122963	0	330	419	0.104698	0	386	341	0.0852074	0	304	286	0.111284	0	383	0	0	0	0
PVP01_1304900	495	0.146667	0	397	389	0.115259	0	344	289	0.0722139	0	477	194	0.0484758	0	404	275	0.107004	0	392	190	0.07393	0	349
PVP01_1021700	494	0.14637	0	398	467	0.13837	0	305	307	0.0767116	0	464	0	0	0	0	265	0.103113	0	400	242	0.0941634	0	317
PVP01_0607700	493	0.146074	0	399	390	0.115556	0	343	529	0.132184	0	326	440	0.109945	0	252	490	0.190661	0	276	377	0.146693	0	232
PVP01_1129800	493	0.146074	0	399	386	0.11437	0	346	169	0.0422289	0	574	0	0	0	0	131	0.0509728	0	517	0	0	0	0
PVP01_0927300	490	0.145185	0	400	492	0.145778	0	295	433	0.108196	0	379	433	0.108196	0	256	NA	NA	NA	NA	NA	NA	NA	NA
PVP01_0920700	488	0.144593	0	401	0	0	0	0	471	0.117691	0	359	0	0	0	0	392	0.152529	0	318	0	0	0	0
PVP01_0806600	486	0.144	0	402	0	0	0	0	378	0.0944528	0	415	0	0	0	0	NA	NA	NA	NA	NA	NA	NA	NA
PVP01_0810500	486	0.144	0	402	498	0.147556	0	290	653	0.163168	0	279	663	0.165667	0	174	573	0.222957	0	243	588	0.228794	0	151
PVP01_1249000	485	0.143704	0	403	192	0.0568889	0	474	225	0.0562219	0	529	74	0.0184908	0	496	123	0.0478599	0	523	0	0	0	0
PVP01_1404200	485	0.143704	0	403	0	0	0	0	749	0.187156	0	244	0	0	0	0	362	0.140856	0	335	0	0	0	0
PVP01_1023900	483	0.143111	0	404	366	0.108444	0	355	332	0.0829585	0	447	279	0.0697151	0	344	264	0.102724	0	401	207	0.0805447	0	338
PVP01_0115300	481	0.142519	0	405	438	0.129778	0	320	348	0.0869565	0	437	326	0.0814593	0	314	362	0.140856	0	335	333	0.129572	0	252
PVP01_1105700	481	0.142519	0	405	484	0.143407	0	299	291	0.0727136	0	476	294	0.0734633	0	334	154	0.0599222	0	496	155	0.0603113	0	374
PVP01_1319300	479	0.141926	0	406	0	0	0	0	334	0.0834583	0	445	0	0	0	0	367	0.142802	0	333	0	0	0	0
PVP01_1247500	477	0.141333	0	407	453	0.134222	0	312	373	0.0932034	0	418	333	0.0832084	0	309	264	0.102724	0	401	234	0.0910506	0	322
PVP01_0928500	476	0.141037	0	408	206	0.061037	0	461	359	0.0897051	0	429	0	0	0	0	251	0.0976654	0	411	129	0.0501945	0	387
PVP01_1303000	476	0.141037	0	408	295	0.0874074	0	401	291	0.0727136	0	476	180	0.0449775	0	414	221	0.0859922	0	440	129	0.0501945	0	387
PVP01_0707800	474	0.140444	0	409	311	0.0921481	0	389	461	0.115192	0	364	0	0	0	0	0	0	0	0	237	0.0922179	0	320
PVP01_0104400	473	0.140148	0	410	462	0.136889	0	308	241	0.0602199	0	517	241	0.0602199	0	372	320	0.124514	0	360	317	0.123346	0	264
PVP01_1129100	472	0.139852	0	411	0	0	0	0	387	0.0967017	0	410	0	0	0	0	232	0.0902724	0	429	0	0	0	0
PVP01_1022000	467	0.13837	0	412	0	0	0	0	NA	NA	NA	NA	NA	NA	NA	NA	298	0.115953	0	372	0	0	0	0
PVP01_1300800	466	0.138074	0	413	424	0.12563	0	326	590	0.147426	0	300	388	0.0969515	0	278	401	0.156031	0	314	330	0.128405	0	254
PVP01_1449600	466	0.138074	0	413	387	0.114667	0	345	399	0.0997002	0	401	321	0.0802099	0	317	379	0.147471	0	326	294	0.114397	0	278
PVP01_1463500	465	0.137778	0	414	0	0	0	0	652	0.162919	0	280	0	0	0	0	NA	NA	NA	NA	NA	NA	NA	NA
PVP01_0513200	462	0.136889	0	415	0	0	0	0	329	0.0822089	0	450	0	0	0	0	NA	NA	NA	NA	NA	NA	NA	NA
PVP01_1442400	461	0.136593	0	416	327	0.0968889	0	380	348	0.0869565	0	437	0	0	0	0	346	0.13463	0	344	233	0.0906615	0	323
PVP01_1435500	458	0.135704	0	417	342	0.101333	0	370	312	0.077961	0	461	0	0	0	0	206	0.0801556	0	454	0	0	0	0
PVP01_0818400	457	0.135407	0	418	197	0.0583704	0	470	321	0.0802099	0	457	143	0.0357321	0	444	210	0.0817121	0	450	0	0	0	0
PVP01_1327800	456	0.135111	0	419	0	0	0	0	391	0.0977012	0	407	0	0	0	0	0	0	0	0	171	0.066537	0	363
PVP01_1440300	456	0.135111	0	419	458	0.135704	0	309	333	0.0832084	0	446	339	0.0847076	0	305	326	0.126848	0	355	328	0.127626	0	256
PVP01_1461200	455	0.134815	0	420	380	0.112593	0	348	191	0.0477261	0	554	0	0	0	0	NA	NA	NA	NA	NA	NA	NA	NA
PVP01_1468900	454	0.134519	0	421	446	0.132148	0	315	374	0.0934533	0	417	376	0.093953	0	285	250	0.0972763	0	412	241	0.0937743	0	318
PVP01_0823100	453	0.134222	0	422	0	0	0	0	372	0.0929535	0	419	0	0	0	0	NA	NA	NA	NA	NA	NA	NA	NA
PVP01_1221500	453	0.134222	0	422	310	0.0918518	0	390	227	0.0567216	0	528	157	0.0392304	0	433	189	0.0735409	0	466	145	0.0564202	0	378
PVP01_1454900	452	0.133926	0	423	0	0	0	0	NA	NA	NA	NA	NA	NA	NA	NA	166	0.0645914	0	486	0	0	0	0
PVP01_0717500	451	0.13363	0	424	378	0.112	0	349	384	0.095952	0	412	299	0.0747126	0	329	283	0.110117	0	385	0	0	0	0
PVP01_1461000	449	0.133037	0	425	306	0.0906667	0	394	195	0.0487256	0	550	135	0.0337331	0	451	42	0.0163424	0	590	0	0	0	0
PVP01_1213700	448	0.132741	0	426	455	0.134815	0	310	738	0.184408	0	246	748	0.186907	0	148	440	0.171206	0	296	444	0.172763	0	201
PVP01_1130500	447	0.132444	0	427	290	0.0859259	0	405	314	0.0784608	0	460	197	0.0492254	0	401	260	0.101167	0	403	0	0	0	0
PVP01_1214000	446	0.132148	0	428	454	0.134519	0	311	364	0.0909545	0	425	359	0.0897051	0	294	220	0.0856031	0	441	235	0.0914397	0	321
PVP01_0313000	445	0.131852	0	429	428	0.126815	0	324	319	0.0797101	0	458	311	0.0777111	0	323	266	0.103502	0	399	259	0.100778	0	303
PVP01_0928700	443	0.131259	0	430	448	0.132741	0	314	231	0.0577211	0	524	232	0.057971	0	378	176	0.0684825	0	476	177	0.0688716	0	358
PVP01_0512900	442	0.130963	0	431	440	0.13037	0	319	445	0.111194	0	372	446	0.111444	0	248	273	0.106226	0	394	273	0.106226	0	291
PVP01_1269400	442	0.130963	0	431	0	0	0	0	223	0.0557221	0	530	0	0	0	0	119	0.0463035	0	527	0	0	0	0
PVP01_0508000	438	0.129778	0	432	0	0	0	0	306	0.0764618	0	465	0	0	0	0	260	0.101167	0	403	0	0	0	0
PVP01_0945500	437	0.129481	0	433	0	0	0	0	652	0.162919	0	280	0	0	0	0	411	0.159922	0	311	0	0	0	0
PVP01_0729800	436	0.129185	0	434	438	0.129778	0	320	289	0.0722139	0	477	290	0.0724638	0	337	255	0.0992218	0	407	257	0.1	0	305
PVP01_1218500	436	0.129185	0	434	0	0	0	0	769	0.192154	0	234	0	0	0	0	462	0.179767	0	285	0	0	0	0
PVP01_0509700	435	0.128889	0	435	0	0	0	0	212	0.0529735	0	537	0	0	0	0	NA	NA	NA	NA	NA	NA	NA	NA
PVP01_1464600	434	0.128593	0	436	0	0	0	0	504	0.125937	0	339	0	0	0	0	283	0.110117	0	385	0	0	0	0
PVP01_0204300	433	0.128296	0	437	446	0.132148	0	315	248	0.061969	0	511	252	0.0629685	0	364	288	0.112062	0	381	290	0.11284	0	281
PVP01_1240700	432	0.128	0	438	355	0.105185	0	361	379	0.0947026	0	414	260	0.0649675	0	360	220	0.0856031	0	441	173	0.0673152	0	361
PVP01_0520900	431	0.127704	0	439	292	0.0865185	0	403	323	0.0807096	0	455	161	0.0402299	0	430	494	0.192218	0	274	300	0.116732	0	274
PVP01_0926100	431	0.127704	0	439	0	0	0	0	588	0.146927	0	301	504	0.125937	0	225	NA	NA	NA	NA	NA	NA	NA	NA
PVP01_0727500	430	0.127407	0	440	287	0.085037	0	407	321	0.0802099	0	457	175	0.0437281	0	419	435	0.169261	0	299	288	0.112062	0	283
PVP01_0107900	426	0.126222	0	441	199	0.058963	0	468	289	0.0722139	0	477	124	0.0309845	0	459	NA	NA	NA	NA	NA	NA	NA	NA
PVP01_0833000	426	0.126222	0	441	377	0.111704	0	350	347	0.0867066	0	438	245	0.0612194	0	369	230	0.0894942	0	431	197	0.0766537	0	346
PVP01_1232600	426	0.126222	0	441	445	0.131852	0	316	478	0.11944	0	354	525	0.131184	0	220	303	0.117899	0	369	329	0.128016	0	255
PVP01_1234500	425	0.125926	0	442	361	0.106963	0	358	NA	NA	NA	NA	NA	NA	NA	NA	NA	NA	NA	NA	NA	NA	NA	NA
PVP01_1331500	421	0.124741	0	443	425	0.125926	0	325	295	0.0737131	0	473	295	0.0737131	0	333	219	0.085214	0	442	219	0.085214	0	332
PVP01_0823500	420	0.124444	0	444	0	0	0	0	412	0.102949	0	391	0	0	0	0	NA	NA	NA	NA	NA	NA	NA	NA
PVP01_0212200	419	0.124148	0	445	296	0.0877037	0	400	230	0.0574713	0	525	178	0.0444778	0	416	194	0.0754864	0	461	146	0.0568093	0	377
PVP01_1029900	418	0.123852	0	446	0	0	0	0	311	0.0777111	0	462	0	0	0	0	NA	NA	NA	NA	NA	NA	NA	NA
PVP01_0701400	417	0.123556	0	447	405	0.12	0	336	393	0.0982009	0	406	385	0.0962019	0	281	331	0.128794	0	352	321	0.124903	0	261
PVP01_0724100	417	0.123556	0	447	0	0	0	0	NA	NA	NA	NA	NA	NA	NA	NA	NA	NA	NA	NA	NA	NA	NA	NA
PVP01_1409300	417	0.123556	0	447	211	0.0625185	0	457	292	0.0729635	0	475	109	0.0272364	0	470	533	0.207393	0	262	230	0.0894942	0	325
PVP01_1468000	416	0.123259	0	448	416	0.123259	0	329	312	0.077961	0	461	312	0.077961	0	322	NA	NA	NA	NA	NA	NA	NA	NA
PVP01_1002900	415	0.122963	0	449	351	0.104	0	364	232	0.057971	0	523	175	0.0437281	0	419	177	0.0688716	0	475	155	0.0603113	0	374
PVP01_0717100	414	0.122667	0	450	315	0.0933333	0	387	NA	NA	NA	NA	NA	NA	NA	NA	214	0.0832685	0	447	125	0.0486381	0	391
PVP01_0717900	414	0.122667	0	450	422	0.125037	0	327	NA	NA	NA	NA	NA	NA	NA	NA	302	0.11751	0	370	308	0.119844	0	271
PVP01_1024000	414	0.122667	0	450	394	0.116741	0	341	149	0.0372314	0	590	139	0.0347326	0	447	231	0.0898833	0	430	219	0.085214	0	332
PVP01_1264900	412	0.122074	0	451	0	0	0	0	329	0.0822089	0	450	0	0	0	0	NA	NA	NA	NA	NA	NA	NA	NA
PVP01_1422700	412	0.122074	0	451	0	0	0	0	271	0.0677161	0	490	27	0.00674663	0	528	248	0.0964981	0	414	0	0	0	0
PVP01_0408300	411	0.121778	0	452	141	0.0417778	0	513	611	0.152674	0	292	96	0.023988	0	479	226	0.0879377	0	435	0	0	0	0
PVP01_0414000	411	0.121778	0	452	318	0.0942222	0	384	151	0.0377311	0	589	98	0.0244878	0	477	213	0.0828794	0	448	163	0.0634241	0	369
PVP01_0418300	411	0.121778	0	452	346	0.102519	0	367	490	0.122439	0	347	446	0.111444	0	248	339	0.131907	0	347	316	0.122957	0	265
PVP01_1326900	411	0.121778	0	452	389	0.115259	0	344	522	0.130435	0	330	481	0.12019	0	234	213	0.0828794	0	448	0	0	0	0
PVP01_0704200	410	0.121481	0	453	398	0.117926	0	338	262	0.0654673	0	499	216	0.053973	0	387	219	0.085214	0	442	202	0.0785992	0	342
PVP01_0410300	409	0.121185	0	454	263	0.0779259	0	426	374	0.0934533	0	417	257	0.0642179	0	361	274	0.106615	0	393	0	0	0	0
PVP01_0718500	409	0.121185	0	454	414	0.122667	0	331	NA	NA	NA	NA	NA	NA	NA	NA	NA	NA	NA	NA	NA	NA	NA	NA
PVP01_0811800	407	0.120593	0	455	319	0.0945185	0	383	343	0.0857071	0	440	248	0.061969	0	367	230	0.0894942	0	431	155	0.0603113	0	374
PVP01_0109900	406	0.120296	0	456	402	0.119111	0	337	281	0.0702149	0	484	271	0.0677161	0	350	180	0.0700389	0	473	171	0.066537	0	363
PVP01_0207800	406	0.120296	0	456	389	0.115259	0	344	NA	NA	NA	NA	NA	NA	NA	NA	NA	NA	NA	NA	NA	NA	NA	NA
PVP01_0733400	405	0.12	0	457	350	0.103704	0	365	208	0.051974	0	541	179	0.0447276	0	415	259	0.100778	0	404	219	0.085214	0	332
PVP01_0809500	405	0.12	0	457	360	0.106667	0	359	193	0.0482259	0	552	177	0.0442279	0	417	332	0.129183	0	351	297	0.115564	0	276
PVP01_0817600	404	0.119704	0	458	0	0	0	0	281	0.0702149	0	484	96	0.023988	0	479	234	0.0910506	0	427	0	0	0	0
PVP01_1232900	403	0.119407	0	459	366	0.108444	0	355	266	0.0664668	0	495	252	0.0629685	0	364	267	0.103891	0	398	248	0.0964981	0	312
PVP01_1464100	403	0.119407	0	459	413	0.12237	0	332	369	0.0922039	0	421	370	0.0924538	0	288	308	0.119844	0	366	312	0.121401	0	267
PVP01_1467700	403	0.119407	0	459	385	0.114074	0	347	NA	NA	NA	NA	NA	NA	NA	NA	244	0.0949416	0	417	232	0.0902724	0	324
PVP01_0701900	401	0.118815	0	460	327	0.0968889	0	380	263	0.0657171	0	498	197	0.0492254	0	401	202	0.0785992	0	457	0	0	0	0
PVP01_1265500	400	0.118519	0	461	0	0	0	0	419	0.104698	0	386	291	0.0727136	0	336	224	0.0871595	0	437	0	0	0	0
PVP01_0814000	399	0.118222	0	462	283	0.0838519	0	411	289	0.0722139	0	477	233	0.0582209	0	377	NA	NA	NA	NA	NA	NA	NA	NA
PVP01_0932800	399	0.118222	0	462	267	0.0791111	0	423	417	0.104198	0	388	217	0.0542229	0	386	316	0.122957	0	362	181	0.070428	0	356
PVP01_1116200	399	0.118222	0	462	360	0.106667	0	359	243	0.0607196	0	515	206	0.0514743	0	394	156	0.0607004	0	494	136	0.0529183	0	384
PVP01_0603900	398	0.117926	0	463	0	0	0	0	433	0.108196	0	379	284	0.0709645	0	342	256	0.0996109	0	406	0	0	0	0
PVP01_1022200	396	0.117333	0	464	213	0.0631111	0	455	NA	NA	NA	NA	NA	NA	NA	NA	246	0.0957198	0	415	0	0	0	0
PVP01_1325700	396	0.117333	0	464	397	0.11763	0	339	0	0	0	0	244	0.0609695	0	370	210	0.0817121	0	450	214	0.0832685	0	333
PVP01_0706300	394	0.116741	0	465	0	0	0	0	NA	NA	NA	NA	NA	NA	NA	NA	668	0.259922	0	209	521	0.202724	0	173
PVP01_1412500	394	0.116741	0	465	0	0	0	0	280	0.069965	0	485	0	0	0	0	329	0.128016	0	353	0	0	0	0
PVP01_0937800	392	0.116148	0	466	303	0.0897778	0	396	278	0.0694653	0	487	180	0.0449775	0	414	265	0.103113	0	400	177	0.0688716	0	358
PVP01_1340900	391	0.115852	0	467	0	0	0	0	408	0.101949	0	394	90	0.0224888	0	485	324	0.12607	0	357	0	0	0	0
PVP01_1012600	390	0.115556	0	468	206	0.061037	0	461	175	0.0437281	0	568	0	0	0	0	677	0.263424	0	206	267	0.103891	0	295
PVP01_1261500	389	0.115259	0	469	155	0.0459259	0	502	379	0.0947026	0	414	0	0	0	0	201	0.0782101	0	458	0	0	0	0
PVP01_1137400	388	0.114963	0	470	335	0.0992593	0	374	333	0.0832084	0	446	270	0.0674663	0	351	283	0.110117	0	385	0	0	0	0
PVP01_0418700	385	0.114074	0	471	353	0.104593	0	363	325	0.0812094	0	453	289	0.0722139	0	338	NA	NA	NA	NA	NA	NA	NA	NA
PVP01_1405200	384	0.113778	0	472	332	0.0983704	0	375	208	0.051974	0	541	168	0.041979	0	424	229	0.0891051	0	432	175	0.0680934	0	360
PVP01_0318400	383	0.113481	0	473	0	0	0	0	NA	NA	NA	NA	NA	NA	NA	NA	NA	NA	NA	NA	NA	NA	NA	NA
PVP01_0620000	383	0.113481	0	473	329	0.0974815	0	378	279	0.0697151	0	486	214	0.0534733	0	389	176	0.0684825	0	476	0	0	0	0
PVP01_0726600	383	0.113481	0	473	0	0	0	0	242	0.0604698	0	516	0	0	0	0	328	0.127626	0	354	0	0	0	0
PVP01_0908600	383	0.113481	0	473	378	0.112	0	349	337	0.0842079	0	443	338	0.0844578	0	306	NA	NA	NA	NA	NA	NA	NA	NA
PVP01_1441300	382	0.113185	0	474	386	0.11437	0	346	1275	0.318591	0	140	1288	0.321839	0	84	392	0.152529	0	318	396	0.154086	0	222
PVP01_0920600	381	0.112889	0	475	372	0.110222	0	353	254	0.0634683	0	506	250	0.0624688	0	365	250	0.0972763	0	412	246	0.0957198	0	313
PVP01_1425600	380	0.112593	0	476	0	0	0	0	478	0.11944	0	354	400	0.09995	0	270	282	0.109728	0	386	0	0	0	0
PVP01_0529100	376	0.111407	0	477	266	0.0788148	0	424	366	0.0914543	0	423	213	0.0532234	0	390	207	0.0805447	0	453	0	0	0	0
PVP01_0109700	375	0.111111	0	478	343	0.10163	0	369	387	0.0967017	0	410	366	0.0914543	0	291	199	0.0774319	0	459	192	0.0747082	0	347
PVP01_0613600	374	0.110815	0	479	330	0.0977778	0	377	300	0.0749625	0	469	266	0.0664668	0	355	224	0.0871595	0	437	200	0.077821	0	343
PVP01_1028200	373	0.110519	0	480	0	0	0	0	268	0.0669665	0	493	0	0	0	0	NA	NA	NA	NA	NA	NA	NA	NA
PVP01_1341500	373	0.110519	0	480	0	0	0	0	367	0.0917041	0	422	0	0	0	0	NA	NA	NA	NA	NA	NA	NA	NA
PVP01_1259900	372	0.110222	0	481	0	0	0	0	260	0.0649675	0	501	0	0	0	0	NA	NA	NA	NA	NA	NA	NA	NA
PVP01_0823200	371	0.109926	0	482	261	0.0773333	0	427	354	0.0884558	0	433	250	0.0624688	0	365	191	0.0743191	0	464	131	0.0509728	0	385
PVP01_0927800	371	0.109926	0	482	0	0	0	0	395	0.0987007	0	404	149	0.0372314	0	439	217	0.0844358	0	444	89	0.0346303	0	413
PVP01_1227700	370	0.10963	0	483	0	0	0	0	435	0.108696	0	378	0	0	0	0	323	0.125681	0	358	0	0	0	0
PVP01_1418500	370	0.10963	0	483	325	0.0962963	0	381	206	0.0514743	0	542	149	0.0372314	0	439	NA	NA	NA	NA	NA	NA	NA	NA
PVP01_0511800	369	0.109333	0	484	199	0.058963	0	468	499	0.124688	0	341	249	0.0622189	0	366	369	0.14358	0	332	208	0.0809339	0	337
PVP01_0109500	368	0.109037	0	485	370	0.10963	0	354	NA	NA	NA	NA	NA	NA	NA	NA	270	0.105058	0	396	273	0.106226	0	291
PVP01_0810200	368	0.109037	0	485	0	0	0	0	535	0.133683	0	321	0	0	0	0	291	0.11323	0	378	0	0	0	0
PVP01_1138300	368	0.109037	0	485	295	0.0874074	0	401	221	0.0552224	0	531	155	0.0387306	0	435	NA	NA	NA	NA	NA	NA	NA	NA
PVP01_1146700	368	0.109037	0	485	347	0.102815	0	366	365	0.0912044	0	424	353	0.0882059	0	299	229	0.0891051	0	432	224	0.0871595	0	329
PVP01_1238900	368	0.109037	0	485	309	0.0915556	0	391	216	0.053973	0	535	0	0	0	0	227	0.0883268	0	434	188	0.0731518	0	350
PVP01_1421400	368	0.109037	0	485	345	0.102222	0	368	NA	NA	NA	NA	NA	NA	NA	NA	290	0.11284	0	379	262	0.101946	0	300
PVP01_0915000	367	0.108741	0	486	0	0	0	0	205	0.0512244	0	543	111	0.0277361	0	469	133	0.051751	0	515	0	0	0	0
PVP01_1011000	367	0.108741	0	486	168	0.0497778	0	491	234	0.0584708	0	521	139	0.0347326	0	447	181	0.070428	0	472	0	0	0	0
PVP01_1422500	365	0.108148	0	487	364	0.107852	0	357	441	0.110195	0	374	444	0.110945	0	250	NA	NA	NA	NA	NA	NA	NA	NA
PVP01_0316800	364	0.107852	0	488	213	0.0631111	0	455	155	0.0387306	0	587	82	0.0204898	0	490	96	0.0373541	0	546	0	0	0	0
PVP01_1269800	364	0.107852	0	488	0	0	0	0	166	0.0414793	0	576	0	0	0	0	144	0.0560311	0	505	0	0	0	0
PVP01_1240400	362	0.107259	0	489	365	0.108148	0	356	204	0.0509745	0	544	204	0.0509745	0	396	NA	NA	NA	NA	NA	NA	NA	NA
PVP01_1245400	362	0.107259	0	489	240	0.0711111	0	439	757	0.189155	0	241	0	0	0	0	664	0.258366	0	210	397	0.154475	0	221
PVP01_1344700	362	0.107259	0	489	0	0	0	0	508	0.126937	0	336	0	0	0	0	384	0.149416	0	322	0	0	0	0
PVP01_1466400	360	0.106667	0	490	317	0.0939259	0	385	183	0.0457271	0	560	148	0.0369815	0	440	NA	NA	NA	NA	NA	NA	NA	NA
PVP01_0105600	358	0.106074	0	491	173	0.0512593	0	486	366	0.0914543	0	423	180	0.0449775	0	414	180	0.0700389	0	473	0	0	0	0
PVP01_1145300	357	0.105778	0	492	237	0.0702222	0	441	284	0.0709645	0	481	131	0.0327336	0	454	NA	NA	NA	NA	NA	NA	NA	NA
PVP01_0616700	356	0.105481	0	493	0	0	0	0	148	0.0369815	0	591	0	0	0	0	123	0.0478599	0	523	0	0	0	0
PVP01_0911100	354	0.104889	0	494	222	0.0657778	0	449	359	0.0897051	0	429	284	0.0709645	0	342	272	0.105837	0	395	0	0	0	0
PVP01_1248300	354	0.104889	0	494	354	0.104889	0	362	366	0.0914543	0	423	366	0.0914543	0	291	332	0.129183	0	351	335	0.13035	0	251
PVP01_1465800	354	0.104889	0	494	297	0.088	0	399	282	0.0704648	0	483	230	0.0574713	0	379	146	0.0568093	0	503	126	0.0490272	0	390
PVP01_0108100	353	0.104593	0	495	327	0.0968889	0	380	348	0.0869565	0	437	262	0.0654673	0	359	207	0.0805447	0	453	182	0.0708171	0	355
PVP01_1021400	352	0.104296	0	496	0	0	0	0	188	0.0469765	0	556	0	0	0	0	235	0.0914397	0	426	0	0	0	0
PVP01_1020600	351	0.104	0	497	327	0.0968889	0	380	268	0.0669665	0	493	0	0	0	0	NA	NA	NA	NA	NA	NA	NA	NA
PVP01_1119100	351	0.104	0	497	183	0.0542222	0	479	238	0.0594703	0	518	0	0	0	0	166	0.0645914	0	486	0	0	0	0
PVP01_0512300	350	0.103704	0	498	306	0.0906667	0	394	236	0.0589705	0	520	211	0.0527236	0	391	296	0.115175	0	374	269	0.104669	0	293
PVP01_0921100	349	0.103407	0	499	290	0.0859259	0	405	435	0.108696	0	378	330	0.0824588	0	311	125	0.0486381	0	521	0	0	0	0
PVP01_1139500	349	0.103407	0	499	281	0.0832593	0	413	NA	NA	NA	NA	NA	NA	NA	NA	211	0.0821012	0	449	147	0.0571984	0	376
PVP01_1334500	348	0.103111	0	500	0	0	0	0	165	0.0412294	0	577	0	0	0	0	135	0.0525292	0	513	0	0	0	0
PVP01_0710500	346	0.102519	0	501	353	0.104593	0	363	210	0.0524738	0	539	219	0.0547226	0	384	242	0.0941634	0	419	249	0.0968872	0	311
PVP01_0726650	346	0.102519	0	501	0	0	0	0	NA	NA	NA	NA	NA	NA	NA	NA	216	0.0840467	0	445	0	0	0	0
PVP01_0728700	346	0.102519	0	501	269	0.0797037	0	421	280	0.069965	0	485	0	0	0	0	165	0.0642023	0	487	110	0.0428016	0	403
PVP01_0733300	346	0.102519	0	501	0	0	0	0	406	0.101449	0	396	0	0	0	0	317	0.123346	0	361	0	0	0	0
PVP01_0814700	346	0.102519	0	501	0	0	0	0	256	0.063968	0	504	114	0.0284858	0	466	207	0.0805447	0	453	0	0	0	0
PVP01_0730200	345	0.102222	0	502	0	0	0	0	158	0.0394803	0	584	0	0	0	0	222	0.0863813	0	439	0	0	0	0
PVP01_0926900	344	0.101926	0	503	202	0.0598518	0	465	332	0.0829585	0	447	0	0	0	0	223	0.0867704	0	438	0	0	0	0
PVP01_0111100	343	0.10163	0	504	210	0.0622222	0	458	193	0.0482259	0	552	142	0.0354823	0	445	218	0.0848249	0	443	0	0	0	0
PVP01_0819700	343	0.10163	0	504	0	0	0	0	174	0.0434783	0	569	0	0	0	0	335	0.13035	0	350	0	0	0	0
PVP01_1456600	343	0.10163	0	504	0	0	0	0	NA	NA	NA	NA	NA	NA	NA	NA	NA	NA	NA	NA	NA	NA	NA	NA
PVP01_1344000	340	0.100741	0	505	220	0.0651852	0	450	294	0.0734633	0	474	0	0	0	0	NA	NA	NA	NA	NA	NA	NA	NA
PVP01_1466700	340	0.100741	0	505	331	0.0980741	0	376	NA	NA	NA	NA	NA	NA	NA	NA	NA	NA	NA	NA	NA	NA	NA	NA
PVP01_1025000	339	0.100444	0	506	0	0	0	0	NA	NA	NA	NA	NA	NA	NA	NA	255	0.0992218	0	407	0	0	0	0
PVP01_0421200	338	0.100148	0	507	0	0	0	0	255	0.0637181	0	505	0	0	0	0	226	0.0879377	0	435	163	0.0634241	0	369
PVP01_0813300	338	0.100148	0	507	0	0	0	0	252	0.0629685	0	508	0	0	0	0	297	0.115564	0	373	165	0.0642023	0	367
PVP01_1030300	338	0.100148	0	507	278	0.0823704	0	416	257	0.0642179	0	503	0	0	0	0	269	0.104669	0	397	209	0.081323	0	336
PVP01_1341300	338	0.100148	0	507	213	0.0631111	0	455	252	0.0629685	0	508	0	0	0	0	NA	NA	NA	NA	NA	NA	NA	NA
PVP01_1454400	338	0.100148	0	507	338	0.100148	0	372	232	0.057971	0	523	235	0.0587206	0	376	NA	NA	NA	NA	NA	NA	NA	NA
PVP01_1464200	338	0.100148	0	507	0	0	0	0	237	0.0592204	0	519	0	0	0	0	NA	NA	NA	NA	NA	NA	NA	NA
PVP01_0516600	337	0.0998519	0	508	341	0.101037	0	371	198	0.0494753	0	548	199	0.0497251	0	399	166	0.0645914	0	486	168	0.0653697	0	365
PVP01_1440800	336	0.0995556	0	509	270	0.08	0	420	156	0.0389805	0	586	120	0.029985	0	462	129	0.0501945	0	518	88	0.0342413	0	414
PVP01_0521200	333	0.0986667	0	510	284	0.0841482	0	410	238	0.0594703	0	518	178	0.0444778	0	416	192	0.0747082	0	463	147	0.0571984	0	376
PVP01_1213400	333	0.0986667	0	510	283	0.0838519	0	411	450	0.112444	0	369	414	0.103448	0	262	NA	NA	NA	NA	NA	NA	NA	NA
PVP01_0825900	332	0.0983704	0	511	0	0	0	0	NA	NA	NA	NA	NA	NA	NA	NA	252	0.0980545	0	410	0	0	0	0
PVP01_0835800	332	0.0983704	0	511	0	0	0	0	402	0.10045	0	399	367	0.0917041	0	290	160	0.0622568	0	490	145	0.0564202	0	378
PVP01_1008600	332	0.0983704	0	511	293	0.0868148	0	402	NA	NA	NA	NA	NA	NA	NA	NA	75	0.0291829	0	565	0	0	0	0
PVP01_1118100	332	0.0983704	0	511	0	0	0	0	249	0.0622189	0	510	0	0	0	0	197	0.0766537	0	460	0	0	0	0
PVP01_1020400	331	0.0980741	0	512	0	0	0	0	206	0.0514743	0	542	0	0	0	0	NA	NA	NA	NA	NA	NA	NA	NA
PVP01_1024700	330	0.0977778	0	513	0	0	0	0	NA	NA	NA	NA	NA	NA	NA	NA	272	0.105837	0	395	0	0	0	0
PVP01_1265000	330	0.0977778	0	513	0	0	0	0	201	0.0502249	0	546	0	0	0	0	NA	NA	NA	NA	NA	NA	NA	NA
PVP01_1002800	328	0.0971852	0	514	329	0.0974815	0	378	NA	NA	NA	NA	NA	NA	NA	NA	140	0.0544747	0	509	141	0.0548638	0	381
PVP01_0701600	327	0.0968889	0	515	0	0	0	0	299	0.0747126	0	470	0	0	0	0	242	0.0941634	0	419	0	0	0	0
PVP01_0619900	326	0.0965926	0	516	0	0	0	0	409	0.102199	0	393	0	0	0	0	235	0.0914397	0	426	0	0	0	0
PVP01_1312500	326	0.0965926	0	516	0	0	0	0	229	0.0572214	0	526	0	0	0	0	235	0.0914397	0	426	0	0	0	0
PVP01_0832700	325	0.0962963	0	517	0	0	0	0	NA	NA	NA	NA	NA	NA	NA	NA	NA	NA	NA	NA	NA	NA	NA	NA
PVP01_0943600	325	0.0962963	0	517	223	0.0660741	0	448	401	0.1002	0	400	263	0.0657171	0	358	387	0.150584	0	320	248	0.0964981	0	312
PVP01_1119900	325	0.0962963	0	517	316	0.0936296	0	386	233	0.0582209	0	522	225	0.0562219	0	383	213	0.0828794	0	448	211	0.0821012	0	335
PVP01_0828900	324	0.096	0	518	222	0.0657778	0	449	214	0.0534733	0	536	0	0	0	0	144	0.0560311	0	505	0	0	0	0
PVP01_1124400	324	0.096	0	518	0	0	0	0	317	0.0792104	0	459	0	0	0	0	232	0.0902724	0	429	0	0	0	0
PVP01_0734300	322	0.0954074	0	519	317	0.0939259	0	385	200	0.049975	0	547	200	0.049975	0	398	228	0.088716	0	433	225	0.0875486	0	328
PVP01_1118400	322	0.0954074	0	519	288	0.0853333	0	406	131	0.0327336	0	604	0	0	0	0	244	0.0949416	0	417	206	0.0801556	0	339
PVP01_1111300	321	0.0951111	0	520	242	0.0717037	0	437	349	0.0872064	0	436	218	0.0544728	0	385	250	0.0972763	0	412	192	0.0747082	0	347
PVP01_1260800	321	0.0951111	0	520	305	0.0903704	0	395	245	0.0612194	0	513	227	0.0567216	0	381	170	0.0661479	0	482	168	0.0653697	0	365
PVP01_1214500	319	0.0945185	0	521	321	0.0951111	0	382	NA	NA	NA	NA	NA	NA	NA	NA	NA	NA	NA	NA	NA	NA	NA	NA
PVP01_1467800	319	0.0945185	0	521	274	0.0811852	0	419	166	0.0414793	0	576	145	0.0362319	0	443	NA	NA	NA	NA	NA	NA	NA	NA
PVP01_0720600	316	0.0936296	0	522	197	0.0583704	0	470	285	0.0712144	0	480	0	0	0	0	190	0.07393	0	465	82	0.0319066	0	419
PVP01_1331100	316	0.0936296	0	522	0	0	0	0	514	0.128436	0	334	0	0	0	0	294	0.114397	0	376	0	0	0	0
PVP01_0505300	315	0.0933333	0	523	218	0.0645926	0	452	NA	NA	NA	NA	NA	NA	NA	NA	NA	NA	NA	NA	NA	NA	NA	NA
PVP01_1305000	314	0.093037	0	524	0	0	0	0	NA	NA	NA	NA	NA	NA	NA	NA	NA	NA	NA	NA	NA	NA	NA	NA
PVP01_1417400	314	0.093037	0	524	280	0.082963	0	414	212	0.0529735	0	537	179	0.0447276	0	415	154	0.0599222	0	496	140	0.0544747	0	382
PVP01_0117200	312	0.0924444	0	525	254	0.0752593	0	431	305	0.0762119	0	466	0	0	0	0	210	0.0817121	0	450	0	0	0	0
PVP01_1011500	312	0.0924444	0	525	299	0.0885926	0	397	124	0.0309845	0	611	123	0.0307346	0	460	69	0.0268483	0	570	63	0.0245136	0	435
PVP01_0103800	311	0.0921481	0	526	0	0	0	0	281	0.0702149	0	484	0	0	0	0	NA	NA	NA	NA	NA	NA	NA	NA
PVP01_0415100	311	0.0921481	0	526	0	0	0	0	NA	NA	NA	NA	NA	NA	NA	NA	226	0.0879377	0	435	172	0.0669261	0	362
PVP01_0513100	311	0.0921481	0	526	0	0	0	0	518	0.129435	0	332	399	0.0997002	0	271	279	0.10856	0	389	0	0	0	0
PVP01_0204700	310	0.0918518	0	527	0	0	0	0	335	0.0837081	0	444	0	0	0	0	314	0.122179	0	363	0	0	0	0
PVP01_0819300	309	0.0915556	0	528	299	0.0885926	0	397	250	0.0624688	0	509	246	0.0614693	0	368	NA	NA	NA	NA	NA	NA	NA	NA
PVP01_0416700	308	0.0912593	0	529	205	0.0607407	0	462	176	0.043978	0	567	136	0.033983	0	450	NA	NA	NA	NA	NA	NA	NA	NA
PVP01_0924900	308	0.0912593	0	529	308	0.0912593	0	392	264	0.065967	0	497	266	0.0664668	0	355	283	0.110117	0	385	285	0.110895	0	284
PVP01_1224200	308	0.0912593	0	529	0	0	0	0	282	0.0704648	0	483	0	0	0	0	221	0.0859922	0	440	0	0	0	0
PVP01_0205400	307	0.090963	0	530	306	0.0906667	0	394	NA	NA	NA	NA	NA	NA	NA	NA	NA	NA	NA	NA	NA	NA	NA	NA
PVP01_1333800	307	0.090963	0	530	0	0	0	0	NA	NA	NA	NA	NA	NA	NA	NA	NA	NA	NA	NA	NA	NA	NA	NA
PVP01_1415900	307	0.090963	0	530	0	0	0	0	454	0.113443	0	366	370	0.0924538	0	288	481	0.18716	0	279	360	0.140078	0	241
PVP01_0905000	304	0.0900741	0	531	280	0.082963	0	414	211	0.0527236	0	538	193	0.0482259	0	405	128	0.0498055	0	519	110	0.0428016	0	403
PVP01_1027200	304	0.0900741	0	531	0	0	0	0	NA	NA	NA	NA	NA	NA	NA	NA	NA	NA	NA	NA	NA	NA	NA	NA
PVP01_1427000	304	0.0900741	0	531	209	0.0619259	0	459	193	0.0482259	0	552	151	0.0377311	0	437	167	0.0649805	0	485	119	0.0463035	0	397
PVP01_1304100	303	0.0897778	0	532	310	0.0918518	0	390	160	0.03998	0	582	162	0.0404798	0	429	158	0.0614786	0	492	163	0.0634241	0	369
PVP01_1303200	302	0.0894815	0	533	0	0	0	0	528	0.131934	0	327	331	0.0827086	0	310	295	0.114786	0	375	0	0	0	0
PVP01_1441500	301	0.0891852	0	534	177	0.0524444	0	484	279	0.0697151	0	486	119	0.0297351	0	463	170	0.0661479	0	482	79	0.0307393	0	422
PVP01_0730800	299	0.0885926	0	535	296	0.0877037	0	400	212	0.0529735	0	537	204	0.0509745	0	396	164	0.0638132	0	488	165	0.0642023	0	367
PVP01_0421700	298	0.0882963	0	536	160	0.0474074	0	497	126	0.0314843	0	609	51	0.0127436	0	514	280	0.108949	0	388	144	0.0560311	0	379
PVP01_0723500	298	0.0882963	0	536	0	0	0	0	476	0.118941	0	356	349	0.0872064	0	302	257	0.1	0	405	0	0	0	0
PVP01_0409600	297	0.088	0	537	281	0.0832593	0	413	259	0.0647176	0	502	240	0.05997	0	373	136	0.0529183	0	512	129	0.0501945	0	387
PVP01_1343500	297	0.088	0	537	299	0.0885926	0	397	409	0.102199	0	393	413	0.103198	0	263	260	0.101167	0	403	261	0.101556	0	301
PVP01_1466900	297	0.088	0	537	286	0.0847407	0	408	138	0.0344828	0	599	130	0.0324838	0	455	NA	NA	NA	NA	NA	NA	NA	NA
PVP01_0505700	295	0.0874074	0	538	180	0.0533333	0	482	231	0.0577211	0	524	124	0.0309845	0	459	160	0.0622568	0	490	104	0.0404669	0	405
PVP01_1106200	295	0.0874074	0	538	0	0	0	0	204	0.0509745	0	544	0	0	0	0	234	0.0910506	0	427	0	0	0	0
PVP01_1315600	295	0.0874074	0	538	298	0.0882963	0	398	261	0.0652174	0	500	250	0.0624688	0	365	135	0.0525292	0	513	128	0.0498055	0	388
PVP01_1437100	294	0.0871111	0	539	0	0	0	0	230	0.0574713	0	525	130	0.0324838	0	455	156	0.0607004	0	494	0	0	0	0
PVP01_0602900	292	0.0865185	0	540	261	0.0773333	0	427	157	0.0392304	0	585	0	0	0	0	NA	NA	NA	NA	NA	NA	NA	NA
PVP01_0603800	292	0.0865185	0	540	0	0	0	0	267	0.0667166	0	494	0	0	0	0	NA	NA	NA	NA	NA	NA	NA	NA
PVP01_0913900	292	0.0865185	0	540	266	0.0788148	0	424	280	0.069965	0	485	265	0.0662169	0	356	191	0.0743191	0	464	183	0.0712062	0	354
PVP01_0617700	291	0.0862222	0	541	238	0.0705185	0	440	324	0.0809595	0	454	273	0.0682159	0	348	NA	NA	NA	NA	NA	NA	NA	NA
PVP01_1120400	291	0.0862222	0	541	220	0.0651852	0	450	NA	NA	NA	NA	NA	NA	NA	NA	NA	NA	NA	NA	NA	NA	NA	NA
PVP01_0116200	290	0.0859259	0	542	291	0.0862222	0	404	159	0.0397301	0	583	160	0.03998	0	431	NA	NA	NA	NA	NA	NA	NA	NA
PVP01_1233700	289	0.0856296	0	543	0	0	0	0	244	0.0609695	0	514	0	0	0	0	NA	NA	NA	NA	NA	NA	NA	NA
PVP01_0214300	288	0.0853333	0	544	282	0.0835556	0	412	200	0.049975	0	547	187	0.0467266	0	410	170	0.0661479	0	482	165	0.0642023	0	367
PVP01_0602400	288	0.0853333	0	544	0	0	0	0	302	0.0754623	0	467	195	0.0487256	0	403	119	0.0463035	0	527	73	0.0284047	0	428
PVP01_0607000	287	0.085037	0	545	235	0.0696296	0	443	254	0.0634683	0	506	230	0.0574713	0	379	236	0.0918288	0	425	213	0.0828794	0	334
PVP01_1217800	287	0.085037	0	545	194	0.0574815	0	472	203	0.0507246	0	545	0	0	0	0	193	0.0750973	0	462	0	0	0	0
PVP01_0807800	286	0.0847407	0	546	260	0.077037	0	428	194	0.0484758	0	551	167	0.0417291	0	425	120	0.0466926	0	526	109	0.0424124	0	404
PVP01_1415400	284	0.0841482	0	547	387	0.114667	0	345	236	0.0589705	0	520	357	0.0892054	0	296	157	0.0610895	0	493	219	0.085214	0	332
PVP01_0932700	283	0.0838519	0	548	0	0	0	0	288	0.071964	0	478	0	0	0	0	218	0.0848249	0	443	0	0	0	0
PVP01_0938100	283	0.0838519	0	548	275	0.0814815	0	418	168	0.041979	0	575	169	0.0422289	0	423	NA	NA	NA	NA	NA	NA	NA	NA
PVP01_0945000	283	0.0838519	0	548	317	0.0939259	0	385	322	0.0804598	0	456	343	0.0857071	0	303	234	0.0910506	0	427	262	0.101946	0	300
PVP01_0948300	283	0.0838519	0	548	255	0.0755556	0	430	NA	NA	NA	NA	NA	NA	NA	NA	144	0.0560311	0	505	129	0.0501945	0	387
PVP01_1211800	282	0.0835556	0	549	184	0.0545185	0	478	NA	NA	NA	NA	NA	NA	NA	NA	181	0.070428	0	472	119	0.0463035	0	397
PVP01_1418400	282	0.0835556	0	549	0	0	0	0	423	0.105697	0	384	383	0.0957021	0	282	231	0.0898833	0	430	203	0.0789883	0	341
PVP01_0802600	281	0.0832593	0	550	198	0.0586667	0	469	163	0.0407296	0	579	112	0.027986	0	468	150	0.0583658	0	499	122	0.0474708	0	394
PVP01_1106300	279	0.0826667	0	551	0	0	0	0	247	0.0617191	0	512	0	0	0	0	NA	NA	NA	NA	NA	NA	NA	NA
PVP01_1010000	277	0.0820741	0	552	0	0	0	0	NA	NA	NA	NA	NA	NA	NA	NA	NA	NA	NA	NA	NA	NA	NA	NA
PVP01_1312000	277	0.0820741	0	552	0	0	0	0	349	0.0872064	0	436	0	0	0	0	439	0.170817	0	297	0	0	0	0
PVP01_1428900	277	0.0820741	0	552	281	0.0832593	0	413	NA	NA	NA	NA	NA	NA	NA	NA	NA	NA	NA	NA	NA	NA	NA	NA
PVP01_0010840	274	0.0811852	0	553	276	0.0817778	0	417	NA	NA	NA	NA	NA	NA	NA	NA	146	0.0568093	0	503	147	0.0571984	0	376
PVP01_1251500	274	0.0811852	0	553	216	0.064	0	454	190	0.0474763	0	555	0	0	0	0	NA	NA	NA	NA	NA	NA	NA	NA
PVP01_0311800	272	0.0805926	0	554	199	0.058963	0	468	223	0.0557221	0	530	0	0	0	0	NA	NA	NA	NA	NA	NA	NA	NA
PVP01_1009700	272	0.0805926	0	554	0	0	0	0	424	0.105947	0	383	0	0	0	0	303	0.117899	0	369	0	0	0	0
PVP01_1211500	271	0.0802963	0	555	246	0.0728889	0	435	221	0.0552224	0	531	161	0.0402299	0	430	148	0.0575876	0	501	0	0	0	0
PVP01_0924100	270	0.08	0	556	0	0	0	0	NA	NA	NA	NA	NA	NA	NA	NA	NA	NA	NA	NA	NA	NA	NA	NA
PVP01_0931900	270	0.08	0	556	209	0.0619259	0	459	148	0.0369815	0	591	114	0.0284858	0	466	NA	NA	NA	NA	NA	NA	NA	NA
PVP01_1430900	270	0.08	0	556	246	0.0728889	0	435	140	0.0349825	0	597	126	0.0314843	0	458	NA	NA	NA	NA	NA	NA	NA	NA
PVP01_0416300	269	0.0797037	0	557	0	0	0	0	191	0.0477261	0	554	0	0	0	0	186	0.0723735	0	469	0	0	0	0
PVP01_1011700	269	0.0797037	0	557	0	0	0	0	329	0.0822089	0	450	299	0.0747126	0	329	267	0.103891	0	398	252	0.0980545	0	308
PVP01_0614500	268	0.0794074	0	558	238	0.0705185	0	440	281	0.0702149	0	484	0	0	0	0	219	0.085214	0	442	207	0.0805447	0	338
PVP01_0708100	268	0.0794074	0	558	193	0.0571852	0	473	116	0.0289855	0	616	0	0	0	0	NA	NA	NA	NA	NA	NA	NA	NA
PVP01_0719400	268	0.0794074	0	558	200	0.0592593	0	467	270	0.0674663	0	491	217	0.0542229	0	386	461	0.179377	0	286	371	0.144358	0	236
PVP01_1270500	268	0.0794074	0	558	232	0.0687407	0	445	261	0.0652174	0	500	203	0.0507246	0	397	184	0.0715953	0	470	155	0.0603113	0	374
PVP01_1211400	267	0.0791111	0	559	185	0.0548148	0	477	312	0.077961	0	461	163	0.0407296	0	428	157	0.0610895	0	493	0	0	0	0
PVP01_1264600	267	0.0791111	0	559	234	0.0693333	0	444	72	0.017991	0	652	63	0.0157421	0	504	46	0.0178988	0	588	40	0.0155642	0	448
PVP01_0804000	266	0.0788148	0	560	257	0.0761481	0	429	NA	NA	NA	NA	NA	NA	NA	NA	173	0.0673152	0	479	160	0.0622568	0	370
PVP01_1028700	266	0.0788148	0	560	0	0	0	0	NA	NA	NA	NA	NA	NA	NA	NA	NA	NA	NA	NA	NA	NA	NA	NA
PVP01_1141800	266	0.0788148	0	560	248	0.0734815	0	434	363	0.0907046	0	426	275	0.0687156	0	347	220	0.0856031	0	441	0	0	0	0
PVP01_0504900	265	0.0785185	0	561	265	0.0785185	0	425	86	0.0214893	0	642	86	0.0214893	0	488	NA	NA	NA	NA	NA	NA	NA	NA
PVP01_0942400	265	0.0785185	0	561	0	0	0	0	NA	NA	NA	NA	NA	NA	NA	NA	722	0.280934	0	195	0	0	0	0
PVP01_1223600	265	0.0785185	0	561	0	0	0	0	190	0.0474763	0	555	0	0	0	0	241	0.0937743	0	420	0	0	0	0
PVP01_1343000	265	0.0785185	0	561	268	0.0794074	0	422	NA	NA	NA	NA	NA	NA	NA	NA	NA	NA	NA	NA	NA	NA	NA	NA
PVP01_1302200	264	0.0782222	0	562	252	0.0746667	0	432	113	0.0282359	0	619	101	0.0252374	0	474	88	0.0342413	0	554	83	0.0322957	0	418
PVP01_1310000	264	0.0782222	0	562	248	0.0734815	0	434	NA	NA	NA	NA	NA	NA	NA	NA	NA	NA	NA	NA	NA	NA	NA	NA
PVP01_1435000	264	0.0782222	0	562	129	0.0382222	0	522	NA	NA	NA	NA	NA	NA	NA	NA	NA	NA	NA	NA	NA	NA	NA	NA
PVP01_0319800	263	0.0779259	0	563	236	0.0699259	0	442	250	0.0624688	0	509	0	0	0	0	138	0.0536965	0	510	113	0.0439689	0	401
PVP01_0812900	263	0.0779259	0	563	263	0.0779259	0	426	NA	NA	NA	NA	NA	NA	NA	NA	NA	NA	NA	NA	NA	NA	NA	NA
PVP01_0940300	262	0.0776296	0	564	263	0.0779259	0	426	163	0.0407296	0	579	165	0.0412294	0	426	223	0.0867704	0	438	224	0.0871595	0	329
PVP01_1417200	262	0.0776296	0	564	0	0	0	0	257	0.0642179	0	503	0	0	0	0	222	0.0863813	0	439	0	0	0	0
PVP01_0813500	261	0.0773333	0	565	0	0	0	0	129	0.0322339	0	606	0	0	0	0	199	0.0774319	0	459	0	0	0	0
PVP01_0410900	260	0.077037	0	566	0	0	0	0	NA	NA	NA	NA	NA	NA	NA	NA	NA	NA	NA	NA	NA	NA	NA	NA
PVP01_1202300	260	0.077037	0	566	141	0.0417778	0	513	271	0.0677161	0	490	0	0	0	0	144	0.0560311	0	505	0	0	0	0
PVP01_1458900	260	0.077037	0	566	0	0	0	0	186	0.0464768	0	558	0	0	0	0	NA	NA	NA	NA	NA	NA	NA	NA
PVP01_1463400	259	0.0767407	0	567	128	0.0379259	0	523	112	0.027986	0	620	30	0.00749625	0	526	109	0.0424124	0	534	0	0	0	0
PVP01_0706500	258	0.0764444	0	568	0	0	0	0	145	0.0362319	0	594	0	0	0	0	114	0.044358	0	530	0	0	0	0
PVP01_0617300	257	0.0761481	0	569	229	0.0678519	0	446	NA	NA	NA	NA	NA	NA	NA	NA	138	0.0536965	0	510	127	0.0494163	0	389
PVP01_1324800	257	0.0761481	0	569	0	0	0	0	279	0.0697151	0	486	0	0	0	0	187	0.0727626	0	468	0	0	0	0
PVP01_1306400	255	0.0755556	0	570	0	0	0	0	NA	NA	NA	NA	NA	NA	NA	NA	245	0.0953307	0	416	0	0	0	0
PVP01_1458600	255	0.0755556	0	570	0	0	0	0	NA	NA	NA	NA	NA	NA	NA	NA	170	0.0661479	0	482	109	0.0424124	0	404
PVP01_0106600	253	0.074963	0	571	0	0	0	0	305	0.0762119	0	466	0	0	0	0	184	0.0715953	0	470	0	0	0	0
PVP01_0216200	253	0.074963	0	571	143	0.0423704	0	511	183	0.0457271	0	560	100	0.0249875	0	475	140	0.0544747	0	509	0	0	0	0
PVP01_1449200	253	0.074963	0	571	261	0.0773333	0	427	NA	NA	NA	NA	NA	NA	NA	NA	NA	NA	NA	NA	NA	NA	NA	NA
PVP01_1135200	252	0.0746667	0	572	217	0.0642963	0	453	178	0.0444778	0	565	140	0.0349825	0	446	140	0.0544747	0	509	125	0.0486381	0	391
PVP01_0410000	251	0.0743704	0	573	248	0.0734815	0	434	NA	NA	NA	NA	NA	NA	NA	NA	225	0.0875486	0	436	222	0.0863813	0	330
PVP01_0707900	250	0.0740741	0	574	0	0	0	0	NA	NA	NA	NA	NA	NA	NA	NA	NA	NA	NA	NA	NA	NA	NA	NA
PVP01_1456300	250	0.0740741	0	574	0	0	0	0	253	0.0632184	0	507	173	0.0432284	0	421	146	0.0568093	0	503	0	0	0	0
PVP01_1265100	248	0.0734815	0	575	226	0.066963	0	447	NA	NA	NA	NA	NA	NA	NA	NA	NA	NA	NA	NA	NA	NA	NA	NA
PVP01_0308400	247	0.0731852	0	576	240	0.0711111	0	439	NA	NA	NA	NA	NA	NA	NA	NA	NA	NA	NA	NA	NA	NA	NA	NA
PVP01_0521000	247	0.0731852	0	576	243	0.072	0	436	NA	NA	NA	NA	NA	NA	NA	NA	188	0.0731518	0	467	187	0.0727626	0	351
PVP01_1028500	247	0.0731852	0	576	0	0	0	0	NA	NA	NA	NA	NA	NA	NA	NA	156	0.0607004	0	494	0	0	0	0
PVP01_1110900	247	0.0731852	0	576	0	0	0	0	NA	NA	NA	NA	NA	NA	NA	NA	NA	NA	NA	NA	NA	NA	NA	NA
PVP01_0915400	246	0.0728889	0	577	243	0.072	0	436	182	0.0454773	0	561	174	0.0434783	0	420	244	0.0949416	0	417	238	0.092607	0	319
PVP01_1319200	246	0.0728889	0	577	156	0.0462222	0	501	NA	NA	NA	NA	NA	NA	NA	NA	NA	NA	NA	NA	NA	NA	NA	NA
PVP01_1017300	244	0.0722963	0	578	0	0	0	0	NA	NA	NA	NA	NA	NA	NA	NA	190	0.07393	0	465	0	0	0	0
PVP01_1269500	244	0.0722963	0	578	0	0	0	0	182	0.0454773	0	561	0	0	0	0	110	0.0428016	0	533	0	0	0	0
PVP01_0420400	243	0.072	0	579	243	0.072	0	436	686	0.171414	0	266	690	0.172414	0	166	126	0.0490272	0	520	127	0.0494163	0	389
PVP01_0821600	243	0.072	0	579	146	0.0432593	0	508	NA	NA	NA	NA	NA	NA	NA	NA	NA	NA	NA	NA	NA	NA	NA	NA
PVP01_1407600	243	0.072	0	579	202	0.0598518	0	465	164	0.0409795	0	578	0	0	0	0	169	0.0657588	0	483	0	0	0	0
PVP01_0528200	241	0.0714074	0	580	0	0	0	0	NA	NA	NA	NA	NA	NA	NA	NA	NA	NA	NA	NA	NA	NA	NA	NA
PVP01_0722800	241	0.0714074	0	580	0	0	0	0	219	0.0547226	0	533	0	0	0	0	174	0.0677043	0	478	0	0	0	0
PVP01_1231100	241	0.0714074	0	580	0	0	0	0	NA	NA	NA	NA	NA	NA	NA	NA	209	0.081323	0	451	0	0	0	0
PVP01_0929800	240	0.0711111	0	581	67	0.0198519	0	567	344	0.085957	0	439	112	0.027986	0	468	260	0.101167	0	403	118	0.0459144	0	398
PVP01_1203300	240	0.0711111	0	581	198	0.0586667	0	469	123	0.0307346	0	612	0	0	0	0	NA	NA	NA	NA	NA	NA	NA	NA
PVP01_1311100	240	0.0711111	0	581	234	0.0693333	0	444	206	0.0514743	0	542	0	0	0	0	NA	NA	NA	NA	NA	NA	NA	NA
PVP01_1457100	240	0.0711111	0	581	0	0	0	0	NA	NA	NA	NA	NA	NA	NA	NA	143	0.055642	0	506	0	0	0	0
PVP01_0826200	237	0.0702222	0	582	122	0.0361481	0	527	NA	NA	NA	NA	NA	NA	NA	NA	NA	NA	NA	NA	NA	NA	NA	NA
PVP01_0923300	236	0.0699259	0	583	0	0	0	0	283	0.0707146	0	482	0	0	0	0	217	0.0844358	0	444	0	0	0	0
PVP01_1015300	235	0.0696296	0	584	189	0.056	0	476	179	0.0447276	0	564	147	0.0367316	0	441	208	0.0809339	0	452	0	0	0	0
PVP01_1232300	235	0.0696296	0	584	183	0.0542222	0	479	301	0.0752124	0	468	0	0	0	0	155	0.0603113	0	495	0	0	0	0
PVP01_1232500	235	0.0696296	0	584	154	0.0456296	0	503	228	0.0569715	0	527	0	0	0	0	124	0.048249	0	522	0	0	0	0
PVP01_0724700	234	0.0693333	0	585	0	0	0	0	147	0.0367316	0	592	0	0	0	0	270	0.105058	0	396	0	0	0	0
PVP01_0932000	234	0.0693333	0	585	210	0.0622222	0	458	181	0.0452274	0	562	152	0.037981	0	436	221	0.0859922	0	440	191	0.0743191	0	348
PVP01_1031400	233	0.069037	0	586	235	0.0696296	0	443	NA	NA	NA	NA	NA	NA	NA	NA	NA	NA	NA	NA	NA	NA	NA	NA
PVP01_0822900	232	0.0687407	0	587	151	0.0447407	0	505	135	0.0337331	0	601	0	0	0	0	NA	NA	NA	NA	NA	NA	NA	NA
PVP01_0948200	232	0.0687407	0	587	0	0	0	0	130	0.0324838	0	605	0	0	0	0	183	0.0712062	0	471	0	0	0	0
PVP01_0830000	231	0.0684444	0	588	232	0.0687407	0	445	NA	NA	NA	NA	NA	NA	NA	NA	NA	NA	NA	NA	NA	NA	NA	NA
PVP01_1221400	231	0.0684444	0	588	204	0.0604444	0	463	219	0.0547226	0	533	0	0	0	0	NA	NA	NA	NA	NA	NA	NA	NA
PVP01_1439300	230	0.0681482	0	589	190	0.0562963	0	475	146	0.0364818	0	593	113	0.0282359	0	467	126	0.0490272	0	520	0	0	0	0
PVP01_0834700	229	0.0678519	0	590	0	0	0	0	NA	NA	NA	NA	NA	NA	NA	NA	NA	NA	NA	NA	NA	NA	NA	NA
PVP01_1103800	229	0.0678519	0	590	0	0	0	0	191	0.0477261	0	554	0	0	0	0	119	0.0463035	0	527	0	0	0	0
PVP01_0109300	227	0.0672593	0	591	0	0	0	0	842	0.210395	0	209	0	0	0	0	225	0.0875486	0	436	0	0	0	0
PVP01_0303200	227	0.0672593	0	591	226	0.066963	0	447	197	0.0492254	0	549	198	0.0494753	0	400	NA	NA	NA	NA	NA	NA	NA	NA
PVP01_0531000	225	0.0666667	0	592	213	0.0631111	0	455	170	0.0424788	0	573	152	0.037981	0	436	125	0.0486381	0	521	121	0.0470817	0	395
PVP01_0618500	224	0.0663704	0	593	0	0	0	0	NA	NA	NA	NA	NA	NA	NA	NA	NA	NA	NA	NA	NA	NA	NA	NA
PVP01_1232100	224	0.0663704	0	593	207	0.0613333	0	460	NA	NA	NA	NA	NA	NA	NA	NA	NA	NA	NA	NA	NA	NA	NA	NA
PVP01_1329100	224	0.0663704	0	593	0	0	0	0	NA	NA	NA	NA	NA	NA	NA	NA	96	0.0373541	0	546	71	0.0276265	0	430
PVP01_1321900	223	0.0660741	0	594	182	0.0539259	0	480	86	0.0214893	0	642	0	0	0	0	126	0.0490272	0	520	0	0	0	0
PVP01_1329700	222	0.0657778	0	595	130	0.0385185	0	521	182	0.0454773	0	561	78	0.0194903	0	494	151	0.0587549	0	498	0	0	0	0
PVP01_1117200	221	0.0654815	0	596	195	0.0577778	0	471	NA	NA	NA	NA	NA	NA	NA	NA	NA	NA	NA	NA	NA	NA	NA	NA
PVP01_1453500	221	0.0654815	0	596	0	0	0	0	NA	NA	NA	NA	NA	NA	NA	NA	NA	NA	NA	NA	NA	NA	NA	NA
PVP01_0103500	220	0.0651852	0	597	0	0	0	0	270	0.0674663	0	491	0	0	0	0	235	0.0914397	0	426	0	0	0	0
PVP01_0532100	220	0.0651852	0	597	190	0.0562963	0	475	99	0.0247376	0	631	79	0.0197401	0	493	NA	NA	NA	NA	NA	NA	NA	NA
PVP01_0724400	219	0.0648889	0	598	185	0.0548148	0	477	330	0.0824588	0	449	278	0.0694653	0	345	158	0.0614786	0	492	130	0.0505837	0	386
PVP01_1137600	219	0.0648889	0	598	203	0.0601481	0	464	169	0.0422289	0	574	0	0	0	0	143	0.055642	0	506	0	0	0	0
PVP01_0729000	218	0.0645926	0	599	0	0	0	0	NA	NA	NA	NA	NA	NA	NA	NA	NA	NA	NA	NA	NA	NA	NA	NA
PVP01_1131000	218	0.0645926	0	599	0	0	0	0	NA	NA	NA	NA	NA	NA	NA	NA	NA	NA	NA	NA	NA	NA	NA	NA
PVP01_1253100	218	0.0645926	0	599	0	0	0	0	188	0.0469765	0	556	0	0	0	0	119	0.0463035	0	527	0	0	0	0
PVP01_1305300	218	0.0645926	0	599	0	0	0	0	102	0.0254873	0	628	52	0.0129935	0	513	NA	NA	NA	NA	NA	NA	NA	NA
PVP01_1338600	218	0.0645926	0	599	116	0.0343704	0	532	181	0.0452274	0	562	67	0.0167416	0	501	NA	NA	NA	NA	NA	NA	NA	NA
PVP01_1415800	218	0.0645926	0	599	159	0.0471111	0	498	195	0.0487256	0	550	0	0	0	0	NA	NA	NA	NA	NA	NA	NA	NA
PVP01_1453400	218	0.0645926	0	599	219	0.0648889	0	451	91	0.0227386	0	639	92	0.0229885	0	483	NA	NA	NA	NA	NA	NA	NA	NA
PVP01_0422000	217	0.0642963	0	600	218	0.0645926	0	452	156	0.0389805	0	586	156	0.0389805	0	434	NA	NA	NA	NA	NA	NA	NA	NA
PVP01_0723700	217	0.0642963	0	600	0	0	0	0	NA	NA	NA	NA	NA	NA	NA	NA	NA	NA	NA	NA	NA	NA	NA	NA
PVP01_1121800	217	0.0642963	0	600	210	0.0622222	0	458	177	0.0442279	0	566	176	0.043978	0	418	82	0.0319066	0	560	82	0.0319066	0	419
PVP01_1132900	216	0.064	0	601	200	0.0592593	0	467	106	0.0264868	0	624	100	0.0249875	0	475	118	0.0459144	0	528	110	0.0428016	0	403
PVP01_0415000	213	0.0631111	0	602	0	0	0	0	172	0.0429785	0	571	0	0	0	0	NA	NA	NA	NA	NA	NA	NA	NA
PVP01_1258100	213	0.0631111	0	602	0	0	0	0	NA	NA	NA	NA	NA	NA	NA	NA	NA	NA	NA	NA	NA	NA	NA	NA
PVP01_1417300	213	0.0631111	0	602	164	0.0485926	0	494	236	0.0589705	0	520	0	0	0	0	165	0.0642023	0	487	119	0.0463035	0	397
PVP01_1126600	211	0.0625185	0	603	156	0.0462222	0	501	157	0.0392304	0	585	104	0.025987	0	473	NA	NA	NA	NA	NA	NA	NA	NA
PVP01_1245200	211	0.0625185	0	603	199	0.058963	0	468	166	0.0414793	0	576	143	0.0357321	0	444	NA	NA	NA	NA	NA	NA	NA	NA
PVP01_1249300	211	0.0625185	0	603	184	0.0545185	0	478	146	0.0364818	0	593	129	0.0322339	0	456	141	0.0548638	0	508	111	0.0431907	0	402
PVP01_1205900	210	0.0622222	0	604	120	0.0355556	0	529	NA	NA	NA	NA	NA	NA	NA	NA	126	0.0490272	0	520	53	0.0206226	0	440
PVP01_1248600	210	0.0622222	0	604	0	0	0	0	NA	NA	NA	NA	NA	NA	NA	NA	NA	NA	NA	NA	NA	NA	NA	NA
PVP01_1405900	210	0.0622222	0	604	158	0.0468148	0	499	130	0.0324838	0	605	96	0.023988	0	479	NA	NA	NA	NA	NA	NA	NA	NA
PVP01_1455500	210	0.0622222	0	604	0	0	0	0	NA	NA	NA	NA	NA	NA	NA	NA	112	0.0435798	0	531	0	0	0	0
PVP01_0416400	209	0.0619259	0	605	211	0.0625185	0	457	99	0.0247376	0	631	100	0.0249875	0	475	NA	NA	NA	NA	NA	NA	NA	NA
PVP01_1016000	209	0.0619259	0	605	0	0	0	0	NA	NA	NA	NA	NA	NA	NA	NA	NA	NA	NA	NA	NA	NA	NA	NA
PVP01_1420000	209	0.0619259	0	605	106	0.0314074	0	539	296	0.073963	0	472	0	0	0	0	189	0.0735409	0	466	0	0	0	0
PVP01_0913700	207	0.0613333	0	606	156	0.0462222	0	501	161	0.0402299	0	581	138	0.0344828	0	448	NA	NA	NA	NA	NA	NA	NA	NA
PVP01_1006300	207	0.0613333	0	606	204	0.0604444	0	463	132	0.0329835	0	603	0	0	0	0	NA	NA	NA	NA	NA	NA	NA	NA
PVP01_1030600	206	0.061037	0	607	0	0	0	0	NA	NA	NA	NA	NA	NA	NA	NA	NA	NA	NA	NA	NA	NA	NA	NA
PVP01_1133000	206	0.061037	0	607	0	0	0	0	NA	NA	NA	NA	NA	NA	NA	NA	153	0.0595331	0	497	0	0	0	0
PVP01_1306600	206	0.061037	0	607	0	0	0	0	127	0.0317341	0	608	0	0	0	0	90	0.0350195	0	552	0	0	0	0
PVP01_0317000	205	0.0607407	0	608	0	0	0	0	716	0.178911	0	254	403	0.1007	0	269	215	0.0836576	0	446	0	0	0	0
PVP01_1225900	205	0.0607407	0	608	0	0	0	0	278	0.0694653	0	487	0	0	0	0	NA	NA	NA	NA	NA	NA	NA	NA
PVP01_1248400	204	0.0604444	0	609	100	0.0296296	0	544	113	0.0282359	0	619	0	0	0	0	78	0.0303502	0	564	0	0	0	0
PVP01_1423300	204	0.0604444	0	609	0	0	0	0	NA	NA	NA	NA	NA	NA	NA	NA	55	0.0214008	0	580	0	0	0	0
PVP01_0930500	203	0.0601481	0	610	0	0	0	0	180	0.0449775	0	563	0	0	0	0	207	0.0805447	0	453	0	0	0	0
PVP01_1440900	203	0.0601481	0	610	0	0	0	0	271	0.0677161	0	490	0	0	0	0	259	0.100778	0	404	0	0	0	0
PVP01_0937900	202	0.0598518	0	611	202	0.0598518	0	465	128	0.031984	0	607	128	0.031984	0	457	175	0.0680934	0	477	175	0.0680934	0	360
PVP01_1130100	202	0.0598518	0	611	138	0.0408889	0	515	127	0.0317341	0	608	0	0	0	0	NA	NA	NA	NA	NA	NA	NA	NA
PVP01_0515500	200	0.0592593	0	612	0	0	0	0	NA	NA	NA	NA	NA	NA	NA	NA	NA	NA	NA	NA	NA	NA	NA	NA
PVP01_1232700	199	0.058963	0	613	0	0	0	0	NA	NA	NA	NA	NA	NA	NA	NA	187	0.0727626	0	468	0	0	0	0
PVP01_1312600	199	0.058963	0	613	114	0.0337778	0	533	135	0.0337331	0	601	0	0	0	0	134	0.0521401	0	514	0	0	0	0
PVP01_1343800	199	0.058963	0	613	120	0.0355556	0	529	220	0.0549725	0	532	157	0.0392304	0	433	174	0.0677043	0	478	0	0	0	0
PVP01_0212300	198	0.0586667	0	614	185	0.0548148	0	477	NA	NA	NA	NA	NA	NA	NA	NA	80	0.0311284	0	562	0	0	0	0
PVP01_1005600	198	0.0586667	0	614	0	0	0	0	119	0.0297351	0	614	0	0	0	0	NA	NA	NA	NA	NA	NA	NA	NA
PVP01_1247400	198	0.0586667	0	614	0	0	0	0	NA	NA	NA	NA	NA	NA	NA	NA	104	0.0404669	0	538	0	0	0	0
PVP01_1412400	198	0.0586667	0	614	0	0	0	0	NA	NA	NA	NA	NA	NA	NA	NA	NA	NA	NA	NA	NA	NA	NA	NA
PVP01_1135400	197	0.0583704	0	615	0	0	0	0	NA	NA	NA	NA	NA	NA	NA	NA	88	0.0342413	0	554	0	0	0	0
PVP01_0714400	195	0.0577778	0	616	0	0	0	0	242	0.0604698	0	516	0	0	0	0	116	0.0451362	0	529	0	0	0	0
PVP01_1346200	195	0.0577778	0	616	171	0.0506667	0	488	NA	NA	NA	NA	NA	NA	NA	NA	111	0.0431907	0	532	0	0	0	0
PVP01_0508800	192	0.0568889	0	617	162	0.048	0	496	NA	NA	NA	NA	NA	NA	NA	NA	NA	NA	NA	NA	NA	NA	NA	NA
PVP01_0531400	192	0.0568889	0	617	0	0	0	0	NA	NA	NA	NA	NA	NA	NA	NA	155	0.0603113	0	495	0	0	0	0
PVP01_1117100	192	0.0568889	0	617	193	0.0571852	0	473	88	0.021989	0	641	91	0.0227386	0	484	176	0.0684825	0	476	176	0.0684825	0	359
PVP01_0702100	191	0.0565926	0	618	0	0	0	0	NA	NA	NA	NA	NA	NA	NA	NA	NA	NA	NA	NA	NA	NA	NA	NA
PVP01_0810400	191	0.0565926	0	618	0	0	0	0	465	0.116192	0	361	0	0	0	0	244	0.0949416	0	417	0	0	0	0
PVP01_1316100	191	0.0565926	0	618	155	0.0459259	0	502	131	0.0327336	0	604	111	0.0277361	0	469	175	0.0680934	0	477	156	0.0607004	0	373
PVP01_0308500	190	0.0562963	0	619	0	0	0	0	NA	NA	NA	NA	NA	NA	NA	NA	NA	NA	NA	NA	NA	NA	NA	NA
PVP01_1226200	188	0.0557037	0	620	181	0.0536296	0	481	NA	NA	NA	NA	NA	NA	NA	NA	NA	NA	NA	NA	NA	NA	NA	NA
PVP01_1256900	188	0.0557037	0	620	91	0.026963	0	552	NA	NA	NA	NA	NA	NA	NA	NA	NA	NA	NA	NA	NA	NA	NA	NA
PVP01_1002400	187	0.0554074	0	621	178	0.0527407	0	483	NA	NA	NA	NA	NA	NA	NA	NA	NA	NA	NA	NA	NA	NA	NA	NA
PVP01_1450900	187	0.0554074	0	621	183	0.0542222	0	479	176	0.043978	0	567	284	0.0709645	0	342	NA	NA	NA	NA	NA	NA	NA	NA
PVP01_0109000	186	0.0551111	0	622	0	0	0	0	271	0.0677161	0	490	0	0	0	0	157	0.0610895	0	493	150	0.0583658	0	375
PVP01_0944900	186	0.0551111	0	622	0	0	0	0	NA	NA	NA	NA	NA	NA	NA	NA	NA	NA	NA	NA	NA	NA	NA	NA
PVP01_1233000	186	0.0551111	0	622	0	0	0	0	NA	NA	NA	NA	NA	NA	NA	NA	NA	NA	NA	NA	NA	NA	NA	NA
PVP01_MIT02700	185	0.0548148	0	623	185	0.0548148	0	477	132	0.0329835	0	603	132	0.0329835	0	453	249	0.0968872	0	413	249	0.0968872	0	311
PVP01_0924200	183	0.0542222	0	624	185	0.0548148	0	477	86	0.0214893	0	642	87	0.0217391	0	487	NA	NA	NA	NA	NA	NA	NA	NA
PVP01_0511000	182	0.0539259	0	625	108	0.032	0	538	NA	NA	NA	NA	NA	NA	NA	NA	NA	NA	NA	NA	NA	NA	NA	NA
PVP01_1339600	182	0.0539259	0	625	154	0.0456296	0	503	168	0.041979	0	575	135	0.0337331	0	451	108	0.0420234	0	535	73	0.0284047	0	428
PVP01_0104300	180	0.0533333	0	626	0	0	0	0	130	0.0324838	0	605	97	0.0242379	0	478	96	0.0373541	0	546	90	0.0350195	0	412
PVP01_0508900	179	0.053037	0	627	183	0.0542222	0	479	140	0.0349825	0	597	140	0.0349825	0	446	NA	NA	NA	NA	NA	NA	NA	NA
PVP01_1455600	179	0.053037	0	627	0	0	0	0	NA	NA	NA	NA	NA	NA	NA	NA	NA	NA	NA	NA	NA	NA	NA	NA
PVP01_0722100	178	0.0527407	0	628	0	0	0	0	NA	NA	NA	NA	NA	NA	NA	NA	74	0.0287938	0	566	61	0.0237354	0	436
PVP01_1141400	176	0.0521481	0	629	118	0.034963	0	530	NA	NA	NA	NA	NA	NA	NA	NA	174	0.0677043	0	478	84	0.0326848	0	417
PVP01_1205300	175	0.0518518	0	630	154	0.0456296	0	503	NA	NA	NA	NA	NA	NA	NA	NA	NA	NA	NA	NA	NA	NA	NA	NA
PVP01_1220700	175	0.0518518	0	630	114	0.0337778	0	533	NA	NA	NA	NA	NA	NA	NA	NA	NA	NA	NA	NA	NA	NA	NA	NA
PVP01_1459600	175	0.0518518	0	630	175	0.0518518	0	485	82	0.0204898	0	645	82	0.0204898	0	490	122	0.0474708	0	524	123	0.0478599	0	393
PVP01_0719100	173	0.0512593	0	631	110	0.0325926	0	536	180	0.0449775	0	563	0	0	0	0	171	0.066537	0	481	113	0.0439689	0	401
PVP01_0933900	173	0.0512593	0	631	167	0.0494815	0	492	83	0.0207396	0	644	82	0.0204898	0	490	NA	NA	NA	NA	NA	NA	NA	NA
PVP01_0304200	172	0.050963	0	632	172	0.050963	0	487	86	0.0214893	0	642	88	0.021989	0	486	233	0.0906615	0	428	235	0.0914397	0	321
PVP01_1305900	172	0.050963	0	632	165	0.0488889	0	493	201	0.0502249	0	546	187	0.0467266	0	410	NA	NA	NA	NA	NA	NA	NA	NA
PVP01_1432400	172	0.050963	0	632	0	0	0	0	308	0.0769615	0	463	0	0	0	0	NA	NA	NA	NA	NA	NA	NA	NA
PVP01_1423100	171	0.0506667	0	633	77	0.0228148	0	561	367	0.0917041	0	422	0	0	0	0	375	0.145914	0	328	251	0.0976654	0	309
PVP01_1333900	170	0.0503704	0	634	170	0.0503704	0	489	NA	NA	NA	NA	NA	NA	NA	NA	NA	NA	NA	NA	NA	NA	NA	NA
PVP01_1216200	168	0.0497778	0	635	173	0.0512593	0	486	NA	NA	NA	NA	NA	NA	NA	NA	183	0.0712062	0	471	185	0.0719844	0	353
PVP01_1422100	167	0.0494815	0	636	168	0.0497778	0	491	95	0.0237381	0	635	95	0.0237381	0	480	85	0.0330739	0	557	85	0.0330739	0	416
PVP01_0946000	166	0.0491852	0	637	144	0.0426667	0	510	NA	NA	NA	NA	NA	NA	NA	NA	NA	NA	NA	NA	NA	NA	NA	NA
PVP01_1435800	166	0.0491852	0	637	0	0	0	0	185	0.0462269	0	559	188	0.0469765	0	409	NA	NA	NA	NA	NA	NA	NA	NA
PVP01_1030700	165	0.0488889	0	638	165	0.0488889	0	493	NA	NA	NA	NA	NA	NA	NA	NA	NA	NA	NA	NA	NA	NA	NA	NA
PVP01_1306100	165	0.0488889	0	638	149	0.0441481	0	506	69	0.0172414	0	655	56	0.013993	0	510	69	0.0268483	0	570	58	0.0225681	0	438
PVP01_0917800	164	0.0485926	0	639	164	0.0485926	0	494	105	0.0262369	0	625	106	0.0264868	0	472	NA	NA	NA	NA	NA	NA	NA	NA
PVP01_0918800	164	0.0485926	0	639	0	0	0	0	97	0.0242379	0	633	0	0	0	0	191	0.0743191	0	464	0	0	0	0
PVP01_1339100	164	0.0485926	0	639	145	0.042963	0	509	NA	NA	NA	NA	NA	NA	NA	NA	160	0.0622568	0	490	147	0.0571984	0	376
PVP01_0941400	163	0.0482963	0	640	163	0.0482963	0	495	NA	NA	NA	NA	NA	NA	NA	NA	79	0.0307393	0	563	79	0.0307393	0	422
PVP01_1146300	163	0.0482963	0	640	0	0	0	0	NA	NA	NA	NA	NA	NA	NA	NA	NA	NA	NA	NA	NA	NA	NA	NA
PVP01_1417000	163	0.0482963	0	640	0	0	0	0	117	0.0292354	0	615	0	0	0	0	129	0.0501945	0	518	118	0.0459144	0	398
PVP01_0928900	162	0.048	0	641	157	0.0465185	0	500	NA	NA	NA	NA	NA	NA	NA	NA	NA	NA	NA	NA	NA	NA	NA	NA
PVP01_0729400	161	0.0477037	0	642	151	0.0447407	0	505	59	0.0147426	0	665	59	0.0147426	0	507	101	0.0392996	0	541	96	0.0373541	0	410
PVP01_1334300	161	0.0477037	0	642	0	0	0	0	NA	NA	NA	NA	NA	NA	NA	NA	NA	NA	NA	NA	NA	NA	NA	NA
PVP01_1410700	161	0.0477037	0	642	0	0	0	0	NA	NA	NA	NA	NA	NA	NA	NA	NA	NA	NA	NA	NA	NA	NA	NA
PVP01_1025600	160	0.0474074	0	643	169	0.0500741	0	490	NA	NA	NA	NA	NA	NA	NA	NA	NA	NA	NA	NA	NA	NA	NA	NA
PVP01_1108200	160	0.0474074	0	643	58	0.0171852	0	574	70	0.0174912	0	654	0	0	0	0	88	0.0342413	0	554	0	0	0	0
PVP01_1146200	160	0.0474074	0	643	0	0	0	0	NA	NA	NA	NA	NA	NA	NA	NA	NA	NA	NA	NA	NA	NA	NA	NA
PVP01_1011100	159	0.0471111	0	644	0	0	0	0	NA	NA	NA	NA	NA	NA	NA	NA	NA	NA	NA	NA	NA	NA	NA	NA
PVP01_1239900	159	0.0471111	0	644	159	0.0471111	0	498	NA	NA	NA	NA	NA	NA	NA	NA	NA	NA	NA	NA	NA	NA	NA	NA
PVP01_1451500	159	0.0471111	0	644	159	0.0471111	0	498	190	0.0474763	0	555	191	0.0477261	0	407	NA	NA	NA	NA	NA	NA	NA	NA
PVP01_0304400	158	0.0468148	0	645	0	0	0	0	NA	NA	NA	NA	NA	NA	NA	NA	NA	NA	NA	NA	NA	NA	NA	NA
PVP01_0320000	158	0.0468148	0	645	0	0	0	0	NA	NA	NA	NA	NA	NA	NA	NA	NA	NA	NA	NA	NA	NA	NA	NA
PVP01_1312300	158	0.0468148	0	645	0	0	0	0	NA	NA	NA	NA	NA	NA	NA	NA	NA	NA	NA	NA	NA	NA	NA	NA
PVP01_0836100	157	0.0465185	0	646	0	0	0	0	NA	NA	NA	NA	NA	NA	NA	NA	70	0.0272374	0	569	0	0	0	0
PVP01_1233500	157	0.0465185	0	646	0	0	0	0	NA	NA	NA	NA	NA	NA	NA	NA	NA	NA	NA	NA	NA	NA	NA	NA
PVP01_1405300	155	0.0459259	0	647	0	0	0	0	NA	NA	NA	NA	NA	NA	NA	NA	167	0.0649805	0	485	0	0	0	0
PVP01_0110400	152	0.045037	0	648	0	0	0	0	85	0.0212394	0	643	80	0.01999	0	492	NA	NA	NA	NA	NA	NA	NA	NA
PVP01_0507400	152	0.045037	0	648	103	0.0305185	0	542	NA	NA	NA	NA	NA	NA	NA	NA	66	0.0256809	0	572	37	0.0143969	0	450
PVP01_0526800	152	0.045037	0	648	152	0.045037	0	504	NA	NA	NA	NA	NA	NA	NA	NA	75	0.0291829	0	565	76	0.029572	0	425
PVP01_1468700	152	0.045037	0	648	125	0.037037	0	526	95	0.0237381	0	635	78	0.0194903	0	494	NA	NA	NA	NA	NA	NA	NA	NA
PVP01_0315900	151	0.0447407	0	649	0	0	0	0	NA	NA	NA	NA	NA	NA	NA	NA	NA	NA	NA	NA	NA	NA	NA	NA
PVP01_0905800	151	0.0447407	0	649	146	0.0432593	0	508	145	0.0362319	0	594	135	0.0337331	0	451	138	0.0536965	0	510	130	0.0505837	0	386
PVP01_1242500	151	0.0447407	0	649	0	0	0	0	NA	NA	NA	NA	NA	NA	NA	NA	NA	NA	NA	NA	NA	NA	NA	NA
PVP01_1317200	151	0.0447407	0	649	0	0	0	0	42	0.0104948	0	679	0	0	0	0	89	0.0346303	0	553	0	0	0	0
PVP01_1321200	151	0.0447407	0	649	125	0.037037	0	526	NA	NA	NA	NA	NA	NA	NA	NA	140	0.0544747	0	509	0	0	0	0
PVP01_0210500	150	0.0444444	0	650	0	0	0	0	NA	NA	NA	NA	NA	NA	NA	NA	NA	NA	NA	NA	NA	NA	NA	NA
PVP01_0521300	150	0.0444444	0	650	0	0	0	0	NA	NA	NA	NA	NA	NA	NA	NA	NA	NA	NA	NA	NA	NA	NA	NA
PVP01_0611200	150	0.0444444	0	650	0	0	0	0	68	0.0169915	0	656	48	0.011994	0	517	NA	NA	NA	NA	NA	NA	NA	NA
PVP01_0945300	150	0.0444444	0	650	0	0	0	0	NA	NA	NA	NA	NA	NA	NA	NA	NA	NA	NA	NA	NA	NA	NA	NA
PVP01_1122400	150	0.0444444	0	650	135	0.04	0	517	NA	NA	NA	NA	NA	NA	NA	NA	NA	NA	NA	NA	NA	NA	NA	NA
PVP01_1121600	149	0.0441481	0	651	0	0	0	0	NA	NA	NA	NA	NA	NA	NA	NA	94	0.0365759	0	548	0	0	0	0
PVP01_1230300	149	0.0441481	0	651	155	0.0459259	0	502	NA	NA	NA	NA	NA	NA	NA	NA	NA	NA	NA	NA	NA	NA	NA	NA
PVP01_1346800	149	0.0441481	0	651	0	0	0	0	NA	NA	NA	NA	NA	NA	NA	NA	93	0.0361868	0	549	66	0.0256809	0	433
PVP01_0820600	146	0.0432593	0	652	0	0	0	0	NA	NA	NA	NA	NA	NA	NA	NA	NA	NA	NA	NA	NA	NA	NA	NA
PVP01_0948400	146	0.0432593	0	652	148	0.0438518	0	507	85	0.0212394	0	643	85	0.0212394	0	489	163	0.0634241	0	489	165	0.0642023	0	367
PVP01_1430000	145	0.042963	0	653	134	0.0397037	0	518	132	0.0329835	0	603	118	0.0294853	0	464	126	0.0490272	0	520	115	0.0447471	0	400
PVP01_0512400	144	0.0426667	0	654	0	0	0	0	NA	NA	NA	NA	NA	NA	NA	NA	NA	NA	NA	NA	NA	NA	NA	NA
PVP01_1437700	144	0.0426667	0	654	0	0	0	0	185	0.0462269	0	559	0	0	0	0	118	0.0459144	0	528	0	0	0	0
PVP01_0818500	143	0.0423704	0	655	101	0.0299259	0	543	NA	NA	NA	NA	NA	NA	NA	NA	78	0.0303502	0	564	0	0	0	0
PVP01_1145900	143	0.0423704	0	655	113	0.0334815	0	534	110	0.0274863	0	621	0	0	0	0	NA	NA	NA	NA	NA	NA	NA	NA
PVP01_1403500	143	0.0423704	0	655	0	0	0	0	NA	NA	NA	NA	NA	NA	NA	NA	NA	NA	NA	NA	NA	NA	NA	NA
PVP01_0527200	142	0.0420741	0	656	0	0	0	0	NA	NA	NA	NA	NA	NA	NA	NA	NA	NA	NA	NA	NA	NA	NA	NA
PVP01_1121700	142	0.0420741	0	656	108	0.032	0	538	193	0.0482259	0	552	149	0.0372314	0	439	124	0.048249	0	522	0	0	0	0
PVP01_0406800	141	0.0417778	0	657	96	0.0284444	0	548	82	0.0204898	0	645	0	0	0	0	NA	NA	NA	NA	NA	NA	NA	NA
PVP01_0508200	141	0.0417778	0	657	142	0.0420741	0	512	129	0.0322339	0	606	130	0.0324838	0	455	NA	NA	NA	NA	NA	NA	NA	NA
PVP01_0618300	141	0.0417778	0	657	103	0.0305185	0	542	NA	NA	NA	NA	NA	NA	NA	NA	58	0.0225681	0	578	44	0.0171206	0	444
PVP01_1339000	141	0.0417778	0	657	0	0	0	0	96	0.023988	0	634	0	0	0	0	NA	NA	NA	NA	NA	NA	NA	NA
PVP01_1339500	141	0.0417778	0	657	64	0.018963	0	569	NA	NA	NA	NA	NA	NA	NA	NA	NA	NA	NA	NA	NA	NA	NA	NA
PVP01_0712900	140	0.0414815	0	658	0	0	0	0	121	0.0302349	0	613	0	0	0	0	83	0.0322957	0	559	0	0	0	0
PVP01_1019400	140	0.0414815	0	658	117	0.0346667	0	531	NA	NA	NA	NA	NA	NA	NA	NA	NA	NA	NA	NA	NA	NA	NA	NA
PVP01_1314000	140	0.0414815	0	658	0	0	0	0	NA	NA	NA	NA	NA	NA	NA	NA	NA	NA	NA	NA	NA	NA	NA	NA
PVP01_1112700	138	0.0408889	0	659	0	0	0	0	162	0.0404798	0	580	0	0	0	0	NA	NA	NA	NA	NA	NA	NA	NA
PVP01_1256600	138	0.0408889	0	659	140	0.0414815	0	514	NA	NA	NA	NA	NA	NA	NA	NA	NA	NA	NA	NA	NA	NA	NA	NA
PVP01_0419200	132	0.0391111	0	660	0	0	0	0	NA	NA	NA	NA	NA	NA	NA	NA	NA	NA	NA	NA	NA	NA	NA	NA
PVP01_1137800	132	0.0391111	0	660	131	0.0388148	0	520	NA	NA	NA	NA	NA	NA	NA	NA	NA	NA	NA	NA	NA	NA	NA	NA
PVP01_1320900	132	0.0391111	0	660	132	0.0391111	0	519	48	0.011994	0	675	50	0.0124937	0	515	NA	NA	NA	NA	NA	NA	NA	NA
PVP01_0837900	131	0.0388148	0	661	0	0	0	0	117	0.0292354	0	615	0	0	0	0	NA	NA	NA	NA	NA	NA	NA	NA
PVP01_1004500	131	0.0388148	0	661	0	0	0	0	89	0.0222389	0	640	0	0	0	0	75	0.0291829	0	565	0	0	0	0
PVP01_1011600	131	0.0388148	0	661	106	0.0314074	0	539	NA	NA	NA	NA	NA	NA	NA	NA	NA	NA	NA	NA	NA	NA	NA	NA
PVP01_0714800	129	0.0382222	0	662	0	0	0	0	NA	NA	NA	NA	NA	NA	NA	NA	NA	NA	NA	NA	NA	NA	NA	NA
PVP01_1003300	129	0.0382222	0	662	86	0.0254815	0	554	61	0.0152424	0	663	0	0	0	0	NA	NA	NA	NA	NA	NA	NA	NA
PVP01_0946800	128	0.0379259	0	663	0	0	0	0	NA	NA	NA	NA	NA	NA	NA	NA	NA	NA	NA	NA	NA	NA	NA	NA
PVP01_1117300	128	0.0379259	0	663	0	0	0	0	NA	NA	NA	NA	NA	NA	NA	NA	98	0.0381323	0	544	0	0	0	0
PVP01_1210700	128	0.0379259	0	663	0	0	0	0	NA	NA	NA	NA	NA	NA	NA	NA	79	0.0307393	0	563	0	0	0	0
PVP01_1429000	128	0.0379259	0	663	126	0.0373333	0	525	72	0.017991	0	652	70	0.0174912	0	498	NA	NA	NA	NA	NA	NA	NA	NA
PVP01_1014400	127	0.0376296	0	664	117	0.0346667	0	531	56	0.013993	0	667	38	0.00949525	0	522	NA	NA	NA	NA	NA	NA	NA	NA
PVP01_1341100	127	0.0376296	0	664	127	0.0376296	0	524	NA	NA	NA	NA	NA	NA	NA	NA	NA	NA	NA	NA	NA	NA	NA	NA
PVP01_0602000	125	0.037037	0	665	0	0	0	0	NA	NA	NA	NA	NA	NA	NA	NA	NA	NA	NA	NA	NA	NA	NA	NA
PVP01_1334900	123	0.0364444	0	666	121	0.0358518	0	528	121	0.0302349	0	613	121	0.0302349	0	461	NA	NA	NA	NA	NA	NA	NA	NA
PVP01_1457900	123	0.0364444	0	666	110	0.0325926	0	536	64	0.015992	0	660	54	0.0134933	0	511	NA	NA	NA	NA	NA	NA	NA	NA
PVP01_0204600	122	0.0361481	0	667	0	0	0	0	NA	NA	NA	NA	NA	NA	NA	NA	NA	NA	NA	NA	NA	NA	NA	NA
PVP01_0708800	122	0.0361481	0	667	61	0.0180741	0	571	NA	NA	NA	NA	NA	NA	NA	NA	NA	NA	NA	NA	NA	NA	NA	NA
PVP01_0105500	121	0.0358518	0	668	120	0.0355556	0	529	NA	NA	NA	NA	NA	NA	NA	NA	NA	NA	NA	NA	NA	NA	NA	NA
PVP01_1111000	121	0.0358518	0	668	121	0.0358518	0	528	NA	NA	NA	NA	NA	NA	NA	NA	NA	NA	NA	NA	NA	NA	NA	NA
PVP01_1246500	121	0.0358518	0	668	0	0	0	0	141	0.0352324	0	596	0	0	0	0	NA	NA	NA	NA	NA	NA	NA	NA
PVP01_1458000	121	0.0358518	0	668	0	0	0	0	NA	NA	NA	NA	NA	NA	NA	NA	NA	NA	NA	NA	NA	NA	NA	NA
PVP01_0906400	120	0.0355556	0	669	0	0	0	0	NA	NA	NA	NA	NA	NA	NA	NA	NA	NA	NA	NA	NA	NA	NA	NA
PVP01_1106100	120	0.0355556	0	669	0	0	0	0	NA	NA	NA	NA	NA	NA	NA	NA	NA	NA	NA	NA	NA	NA	NA	NA
PVP01_1429300	120	0.0355556	0	669	0	0	0	0	105	0.0262369	0	625	0	0	0	0	84	0.0326848	0	558	0	0	0	0
PVP01_1140500	119	0.0352593	0	670	0	0	0	0	NA	NA	NA	NA	NA	NA	NA	NA	NA	NA	NA	NA	NA	NA	NA	NA
PVP01_1234900	118	0.034963	0	671	112	0.0331852	0	535	NA	NA	NA	NA	NA	NA	NA	NA	NA	NA	NA	NA	NA	NA	NA	NA
PVP01_1403000	118	0.034963	0	671	0	0	0	0	NA	NA	NA	NA	NA	NA	NA	NA	NA	NA	NA	NA	NA	NA	NA	NA
PVP01_0717800	116	0.0343704	0	672	0	0	0	0	153	0.0382309	0	588	0	0	0	0	NA	NA	NA	NA	NA	NA	NA	NA
PVP01_1419300	115	0.0340741	0	673	92	0.0272593	0	551	NA	NA	NA	NA	NA	NA	NA	NA	NA	NA	NA	NA	NA	NA	NA	NA
PVP01_1441200	113	0.0334815	0	674	0	0	0	0	123	0.0307346	0	612	0	0	0	0	NA	NA	NA	NA	NA	NA	NA	NA
PVP01_0517400	112	0.0331852	0	675	0	0	0	0	181	0.0452274	0	562	0	0	0	0	189	0.0735409	0	466	0	0	0	0
PVP01_0709100	112	0.0331852	0	675	0	0	0	0	NA	NA	NA	NA	NA	NA	NA	NA	NA	NA	NA	NA	NA	NA	NA	NA
PVP01_1226400	112	0.0331852	0	675	94	0.0278519	0	550	NA	NA	NA	NA	NA	NA	NA	NA	NA	NA	NA	NA	NA	NA	NA	NA
PVP01_1263900	112	0.0331852	0	675	106	0.0314074	0	539	42	0.0104948	0	679	37	0.00924538	0	523	41	0.0159533	0	591	36	0.0140078	0	451
PVP01_1407700	112	0.0331852	0	675	82	0.0242963	0	558	NA	NA	NA	NA	NA	NA	NA	NA	50	0.0194553	0	584	43	0.0167315	0	445
PVP01_1245300	111	0.0328889	0	676	109	0.0322963	0	537	NA	NA	NA	NA	NA	NA	NA	NA	NA	NA	NA	NA	NA	NA	NA	NA
PVP01_0103400	109	0.0322963	0	677	0	0	0	0	NA	NA	NA	NA	NA	NA	NA	NA	118	0.0459144	0	528	0	0	0	0
PVP01_0710000	109	0.0322963	0	677	0	0	0	0	NA	NA	NA	NA	NA	NA	NA	NA	NA	NA	NA	NA	NA	NA	NA	NA
PVP01_1130400	109	0.0322963	0	677	0	0	0	0	NA	NA	NA	NA	NA	NA	NA	NA	NA	NA	NA	NA	NA	NA	NA	NA
PVP01_1257800	109	0.0322963	0	677	83	0.0245926	0	557	131	0.0327336	0	604	0	0	0	0	220	0.0856031	0	441	179	0.0696498	0	357
PVP01_0947900	108	0.032	0	678	98	0.029037	0	546	66	0.0164917	0	658	56	0.013993	0	510	NA	NA	NA	NA	NA	NA	NA	NA
PVP01_0928800	107	0.0317037	0	679	58	0.0171852	0	574	NA	NA	NA	NA	NA	NA	NA	NA	NA	NA	NA	NA	NA	NA	NA	NA
PVP01_1335700	107	0.0317037	0	679	99	0.0293333	0	545	121	0.0302349	0	613	113	0.0282359	0	467	86	0.033463	0	556	0	0	0	0
PVP01_0820200	106	0.0314074	0	680	101	0.0299259	0	543	NA	NA	NA	NA	NA	NA	NA	NA	NA	NA	NA	NA	NA	NA	NA	NA
PVP01_1426000	106	0.0314074	0	680	0	0	0	0	67	0.0167416	0	657	0	0	0	0	NA	NA	NA	NA	NA	NA	NA	NA
PVP01_0412600	105	0.0311111	0	681	0	0	0	0	NA	NA	NA	NA	NA	NA	NA	NA	NA	NA	NA	NA	NA	NA	NA	NA
PVP01_0713100	105	0.0311111	0	681	0	0	0	0	NA	NA	NA	NA	NA	NA	NA	NA	NA	NA	NA	NA	NA	NA	NA	NA
PVP01_0413200	104	0.0308148	0	682	0	0	0	0	NA	NA	NA	NA	NA	NA	NA	NA	NA	NA	NA	NA	NA	NA	NA	NA
PVP01_1202800	104	0.0308148	0	682	105	0.0311111	0	540	NA	NA	NA	NA	NA	NA	NA	NA	NA	NA	NA	NA	NA	NA	NA	NA
PVP01_1338100	104	0.0308148	0	682	0	0	0	0	NA	NA	NA	NA	NA	NA	NA	NA	95	0.036965	0	547	58	0.0225681	0	438
PVP01_0818600	103	0.0305185	0	683	104	0.0308148	0	541	NA	NA	NA	NA	NA	NA	NA	NA	NA	NA	NA	NA	NA	NA	NA	NA
PVP01_1344600	103	0.0305185	0	683	0	0	0	0	170	0.0424788	0	573	0	0	0	0	170	0.0661479	0	482	0	0	0	0
PVP01_1461500	103	0.0305185	0	683	101	0.0299259	0	543	37	0.00924538	0	681	37	0.00924538	0	523	36	0.0140078	0	596	35	0.0136187	0	452
PVP01_1239200	102	0.0302222	0	684	81	0.024	0	559	102	0.0254873	0	628	0	0	0	0	NA	NA	NA	NA	NA	NA	NA	NA
PVP01_1021100	101	0.0299259	0	685	0	0	0	0	NA	NA	NA	NA	NA	NA	NA	NA	NA	NA	NA	NA	NA	NA	NA	NA
PVP01_1220800	101	0.0299259	0	685	0	0	0	0	NA	NA	NA	NA	NA	NA	NA	NA	49	0.0190662	0	585	0	0	0	0
PVP01_0116000	99	0.0293333	0	686	99	0.0293333	0	545	NA	NA	NA	NA	NA	NA	NA	NA	NA	NA	NA	NA	NA	NA	NA	NA
PVP01_1403600	98	0.029037	0	687	92	0.0272593	0	551	31	0.00774613	0	684	0	0	0	0	29	0.0112841	0	599	26	0.0101167	0	456
PVP01_1121200	97	0.0287407	0	688	0	0	0	0	83	0.0207396	0	644	0	0	0	0	NA	NA	NA	NA	NA	NA	NA	NA
PVP01_1267000	97	0.0287407	0	688	67	0.0198519	0	567	NA	NA	NA	NA	NA	NA	NA	NA	NA	NA	NA	NA	NA	NA	NA	NA
PVP01_1301400	97	0.0287407	0	688	82	0.0242963	0	558	76	0.0189905	0	649	68	0.0169915	0	500	62	0.0241245	0	576	57	0.022179	0	439
PVP01_1259200	96	0.0284444	0	689	97	0.0287407	0	547	NA	NA	NA	NA	NA	NA	NA	NA	172	0.0669261	0	480	173	0.0673152	0	361
PVP01_1468100	96	0.0284444	0	689	0	0	0	0	NA	NA	NA	NA	NA	NA	NA	NA	NA	NA	NA	NA	NA	NA	NA	NA
PVP01_0409100	95	0.0281482	0	690	0	0	0	0	NA	NA	NA	NA	NA	NA	NA	NA	NA	NA	NA	NA	NA	NA	NA	NA
PVP01_0519000	95	0.0281482	0	690	0	0	0	0	NA	NA	NA	NA	NA	NA	NA	NA	NA	NA	NA	NA	NA	NA	NA	NA
PVP01_0710300	94	0.0278519	0	691	95	0.0281482	0	549	47	0.0117441	0	676	46	0.0114942	0	518	NA	NA	NA	NA	NA	NA	NA	NA
PVP01_0726300	94	0.0278519	0	691	0	0	0	0	98	0.0244878	0	632	0	0	0	0	NA	NA	NA	NA	NA	NA	NA	NA
PVP01_0407300	93	0.0275556	0	692	0	0	0	0	NA	NA	NA	NA	NA	NA	NA	NA	NA	NA	NA	NA	NA	NA	NA	NA
PVP01_0514800	93	0.0275556	0	692	0	0	0	0	NA	NA	NA	NA	NA	NA	NA	NA	NA	NA	NA	NA	NA	NA	NA	NA
PVP01_0526100	93	0.0275556	0	692	0	0	0	0	78	0.0194903	0	647	0	0	0	0	51	0.0198444	0	583	0	0	0	0
PVP01_1303400	92	0.0272593	0	693	0	0	0	0	NA	NA	NA	NA	NA	NA	NA	NA	NA	NA	NA	NA	NA	NA	NA	NA
PVP01_0935100	91	0.026963	0	694	49	0.0145185	0	582	NA	NA	NA	NA	NA	NA	NA	NA	50	0.0194553	0	584	28	0.0108949	0	455
PVP01_1344300	91	0.026963	0	694	0	0	0	0	NA	NA	NA	NA	NA	NA	NA	NA	NA	NA	NA	NA	NA	NA	NA	NA
PVP01_1109600	90	0.0266667	0	695	0	0	0	0	78	0.0194903	0	647	46	0.0114942	0	518	NA	NA	NA	NA	NA	NA	NA	NA
PVP01_0936900	88	0.0260741	0	696	88	0.0260741	0	553	NA	NA	NA	NA	NA	NA	NA	NA	63	0.0245136	0	575	63	0.0245136	0	435
PVP01_0929600	87	0.0257778	0	697	0	0	0	0	NA	NA	NA	NA	NA	NA	NA	NA	NA	NA	NA	NA	NA	NA	NA	NA
PVP01_1242600	87	0.0257778	0	697	59	0.0174815	0	573	NA	NA	NA	NA	NA	NA	NA	NA	NA	NA	NA	NA	NA	NA	NA	NA
PVP01_0302600	86	0.0254815	0	698	88	0.0260741	0	553	49	0.0122439	0	674	49	0.0122439	0	516	NA	NA	NA	NA	NA	NA	NA	NA
PVP01_MIT03300	86	0.0254815	0	698	86	0.0254815	0	554	NA	NA	NA	NA	NA	NA	NA	NA	123	0.0478599	0	523	123	0.0478599	0	393
PVP01_0923700	85	0.0251852	0	699	76	0.0225185	0	562	114	0.0284858	0	618	81	0.0202399	0	491	68	0.0264591	0	571	50	0.0194553	0	442
PVP01_0214200	84	0.0248889	0	700	85	0.0251852	0	555	NA	NA	NA	NA	NA	NA	NA	NA	83	0.0322957	0	559	83	0.0322957	0	418
PVP01_1455200	84	0.0248889	0	700	84	0.0248889	0	556	NA	NA	NA	NA	NA	NA	NA	NA	NA	NA	NA	NA	NA	NA	NA	NA
PVP01_1123000	83	0.0245926	0	701	83	0.0245926	0	557	NA	NA	NA	NA	NA	NA	NA	NA	40	0.0155642	0	592	40	0.0155642	0	448
PVP01_0618700	82	0.0242963	0	702	0	0	0	0	NA	NA	NA	NA	NA	NA	NA	NA	NA	NA	NA	NA	NA	NA	NA	NA
PVP01_0303100	81	0.024	0	703	76	0.0225185	0	562	NA	NA	NA	NA	NA	NA	NA	NA	NA	NA	NA	NA	NA	NA	NA	NA
PVP01_1107200	80	0.0237037	0	704	0	0	0	0	NA	NA	NA	NA	NA	NA	NA	NA	NA	NA	NA	NA	NA	NA	NA	NA
PVP01_1124700	80	0.0237037	0	704	82	0.0242963	0	558	26	0.00649675	0	687	26	0.00649675	0	529	92	0.0357977	0	550	93	0.0361868	0	411
PVP01_1404700	80	0.0237037	0	704	65	0.0192593	0	568	59	0.0147426	0	665	37	0.00924538	0	523	56	0.0217899	0	579	49	0.0190662	0	443
PVP01_1456500	79	0.0234074	0	705	0	0	0	0	NA	NA	NA	NA	NA	NA	NA	NA	NA	NA	NA	NA	NA	NA	NA	NA
PVP01_0420500	78	0.0231111	0	706	73	0.0216296	0	564	NA	NA	NA	NA	NA	NA	NA	NA	NA	NA	NA	NA	NA	NA	NA	NA
PVP01_1257400	78	0.0231111	0	706	42	0.0124444	0	585	NA	NA	NA	NA	NA	NA	NA	NA	NA	NA	NA	NA	NA	NA	NA	NA
PVP01_1270300	78	0.0231111	0	706	79	0.0234074	0	560	49	0.0122439	0	674	49	0.0122439	0	516	98	0.0381323	0	544	99	0.0385214	0	409
PVP01_1343200	78	0.0231111	0	706	61	0.0180741	0	571	NA	NA	NA	NA	NA	NA	NA	NA	NA	NA	NA	NA	NA	NA	NA	NA
PVP01_1431900	78	0.0231111	0	706	79	0.0234074	0	560	NA	NA	NA	NA	NA	NA	NA	NA	NA	NA	NA	NA	NA	NA	NA	NA
PVP01_0612900	77	0.0228148	0	707	0	0	0	0	NA	NA	NA	NA	NA	NA	NA	NA	NA	NA	NA	NA	NA	NA	NA	NA
PVP01_0915900	77	0.0228148	0	707	0	0	0	0	NA	NA	NA	NA	NA	NA	NA	NA	NA	NA	NA	NA	NA	NA	NA	NA
PVP01_0829200	76	0.0225185	0	708	0	0	0	0	NA	NA	NA	NA	NA	NA	NA	NA	NA	NA	NA	NA	NA	NA	NA	NA
PVP01_1131900	76	0.0225185	0	708	75	0.0222222	0	563	198	0.0494753	0	548	186	0.0464768	0	411	NA	NA	NA	NA	NA	NA	NA	NA
PVP01_1234700	76	0.0225185	0	708	0	0	0	0	NA	NA	NA	NA	NA	NA	NA	NA	NA	NA	NA	NA	NA	NA	NA	NA
PVP01_1409400	76	0.0225185	0	708	76	0.0225185	0	562	NA	NA	NA	NA	NA	NA	NA	NA	NA	NA	NA	NA	NA	NA	NA	NA
PVP01_1410300	76	0.0225185	0	708	56	0.0165926	0	576	NA	NA	NA	NA	NA	NA	NA	NA	NA	NA	NA	NA	NA	NA	NA	NA
PVP01_1207900	75	0.0222222	0	709	0	0	0	0	NA	NA	NA	NA	NA	NA	NA	NA	NA	NA	NA	NA	NA	NA	NA	NA
PVP01_1237000	75	0.0222222	0	709	0	0	0	0	NA	NA	NA	NA	NA	NA	NA	NA	59	0.0229572	0	577	0	0	0	0
PVP01_1418200	75	0.0222222	0	709	0	0	0	0	NA	NA	NA	NA	NA	NA	NA	NA	NA	NA	NA	NA	NA	NA	NA	NA
PVP01_1431600	75	0.0222222	0	709	31	0.00918519	0	593	71	0.0177411	0	653	0	0	0	0	51	0.0198444	0	583	0	0	0	0
PVP01_1326400	73	0.0216296	0	710	69	0.0204444	0	566	95	0.0237381	0	635	93	0.0232384	0	482	NA	NA	NA	NA	NA	NA	NA	NA
PVP01_0918900	72	0.0213333	0	711	0	0	0	0	NA	NA	NA	NA	NA	NA	NA	NA	69	0.0268483	0	570	66	0.0256809	0	433
PVP01_0607600	69	0.0204444	0	712	0	0	0	0	42	0.0104948	0	679	39	0.00974513	0	521	NA	NA	NA	NA	NA	NA	NA	NA
PVP01_0722500	69	0.0204444	0	712	36	0.0106667	0	590	NA	NA	NA	NA	NA	NA	NA	NA	NA	NA	NA	NA	NA	NA	NA	NA
PVP01_0912900	69	0.0204444	0	712	69	0.0204444	0	566	NA	NA	NA	NA	NA	NA	NA	NA	NA	NA	NA	NA	NA	NA	NA	NA
PVP01_0923500	69	0.0204444	0	712	69	0.0204444	0	566	NA	NA	NA	NA	NA	NA	NA	NA	NA	NA	NA	NA	NA	NA	NA	NA
PVP01_1333600	69	0.0204444	0	712	0	0	0	0	NA	NA	NA	NA	NA	NA	NA	NA	53	0.0206226	0	581	0	0	0	0
PVP01_1408900	68	0.0201482	0	713	0	0	0	0	NA	NA	NA	NA	NA	NA	NA	NA	NA	NA	NA	NA	NA	NA	NA	NA
PVP01_0106800	66	0.0195556	0	714	63	0.0186667	0	570	NA	NA	NA	NA	NA	NA	NA	NA	NA	NA	NA	NA	NA	NA	NA	NA
PVP01_0210900	65	0.0192593	0	715	0	0	0	0	NA	NA	NA	NA	NA	NA	NA	NA	NA	NA	NA	NA	NA	NA	NA	NA
PVP01_1012300	65	0.0192593	0	715	65	0.0192593	0	568	71	0.0177411	0	653	72	0.017991	0	497	159	0.0618677	0	491	159	0.0618677	0	371
PVP01_1210500	64	0.018963	0	716	61	0.0180741	0	571	53	0.0132434	0	670	53	0.0132434	0	512	49	0.0190662	0	585	49	0.0190662	0	443
PVP01_1223100	64	0.018963	0	716	0	0	0	0	NA	NA	NA	NA	NA	NA	NA	NA	NA	NA	NA	NA	NA	NA	NA	NA
PVP01_1462100	63	0.0186667	0	717	0	0	0	0	NA	NA	NA	NA	NA	NA	NA	NA	NA	NA	NA	NA	NA	NA	NA	NA
PVP01_1125900	62	0.0183704	0	718	0	0	0	0	NA	NA	NA	NA	NA	NA	NA	NA	NA	NA	NA	NA	NA	NA	NA	NA
PVP01_1236900	61	0.0180741	0	719	55	0.0162963	0	577	NA	NA	NA	NA	NA	NA	NA	NA	0	0	0	0	37	0.0143969	0	450
PVP01_1340400	61	0.0180741	0	719	51	0.0151111	0	580	NA	NA	NA	NA	NA	NA	NA	NA	NA	NA	NA	NA	NA	NA	NA	NA
PVP01_1413700	61	0.0180741	0	719	0	0	0	0	37	0.00924538	0	681	0	0	0	0	NA	NA	NA	NA	NA	NA	NA	NA
PVP01_0113300	60	0.0177778	0	720	60	0.0177778	0	572	NA	NA	NA	NA	NA	NA	NA	NA	NA	NA	NA	NA	NA	NA	NA	NA
PVP01_1112400	59	0.0174815	0	721	0	0	0	0	102	0.0254873	0	628	0	0	0	0	NA	NA	NA	NA	NA	NA	NA	NA
PVP01_1218300	59	0.0174815	0	721	57	0.0168889	0	575	NA	NA	NA	NA	NA	NA	NA	NA	NA	NA	NA	NA	NA	NA	NA	NA
PVP01_0808300	58	0.0171852	0	722	58	0.0171852	0	574	NA	NA	NA	NA	NA	NA	NA	NA	70	0.0272374	0	569	70	0.0272374	0	431
PVP01_0928300	58	0.0171852	0	722	0	0	0	0	NA	NA	NA	NA	NA	NA	NA	NA	NA	NA	NA	NA	NA	NA	NA	NA
PVP01_1142900	58	0.0171852	0	722	0	0	0	0	59	0.0147426	0	665	0	0	0	0	63	0.0245136	0	575	0	0	0	0
PVP01_0209600	56	0.0165926	0	723	0	0	0	0	NA	NA	NA	NA	NA	NA	NA	NA	73	0.0284047	0	567	0	0	0	0
PVP01_0413400	55	0.0162963	0	724	0	0	0	0	NA	NA	NA	NA	NA	NA	NA	NA	NA	NA	NA	NA	NA	NA	NA	NA
PVP01_1018300	55	0.0162963	0	724	0	0	0	0	NA	NA	NA	NA	NA	NA	NA	NA	NA	NA	NA	NA	NA	NA	NA	NA
PVP01_1452100	55	0.0162963	0	724	0	0	0	0	NA	NA	NA	NA	NA	NA	NA	NA	NA	NA	NA	NA	NA	NA	NA	NA
PVP01_0927700	54	0.016	0	725	39	0.0115556	0	588	51	0.0127436	0	672	0	0	0	0	NA	NA	NA	NA	NA	NA	NA	NA
PVP01_1032600	54	0.016	0	725	37	0.010963	0	589	NA	NA	NA	NA	NA	NA	NA	NA	31	0.0120623	0	598	0	0	0	0
PVP01_1436900	54	0.016	0	725	54	0.016	0	578	NA	NA	NA	NA	NA	NA	NA	NA	78	0.0303502	0	564	78	0.0303502	0	423
PVP01_0305500	52	0.0154074	0	726	50	0.0148148	0	581	NA	NA	NA	NA	NA	NA	NA	NA	NA	NA	NA	NA	NA	NA	NA	NA
PVP01_1307300	52	0.0154074	0	726	52	0.0154074	0	579	21	0.00524738	0	689	21	0.00524738	0	530	52	0.0202335	0	582	52	0.0202335	0	441
PVP01_0705700	51	0.0151111	0	727	41	0.0121481	0	586	NA	NA	NA	NA	NA	NA	NA	NA	NA	NA	NA	NA	NA	NA	NA	NA
PVP01_1015600	47	0.0139259	0	728	0	0	0	0	NA	NA	NA	NA	NA	NA	NA	NA	101	0.0392996	0	541	0	0	0	0
PVP01_1112000	46	0.0136296	0	729	0	0	0	0	NA	NA	NA	NA	NA	NA	NA	NA	NA	NA	NA	NA	NA	NA	NA	NA
PVP01_1268600	46	0.0136296	0	729	44	0.013037	0	584	NA	NA	NA	NA	NA	NA	NA	NA	NA	NA	NA	NA	NA	NA	NA	NA
PVP01_0945900	43	0.0127407	0	730	0	0	0	0	NA	NA	NA	NA	NA	NA	NA	NA	NA	NA	NA	NA	NA	NA	NA	NA
PVP01_0905500	41	0.0121481	0	731	41	0.0121481	0	586	NA	NA	NA	NA	NA	NA	NA	NA	NA	NA	NA	NA	NA	NA	NA	NA
PVP01_1030200	41	0.0121481	0	731	0	0	0	0	NA	NA	NA	NA	NA	NA	NA	NA	NA	NA	NA	NA	NA	NA	NA	NA
PVP01_0520400	40	0.0118519	0	732	40	0.0118519	0	587	NA	NA	NA	NA	NA	NA	NA	NA	NA	NA	NA	NA	NA	NA	NA	NA
PVP01_1237300	40	0.0118519	0	732	40	0.0118519	0	587	NA	NA	NA	NA	NA	NA	NA	NA	NA	NA	NA	NA	NA	NA	NA	NA
PVP01_0622400	38	0.0112593	0	733	0	0	0	0	NA	NA	NA	NA	NA	NA	NA	NA	NA	NA	NA	NA	NA	NA	NA	NA
PVP01_1338300	38	0.0112593	0	733	0	0	0	0	NA	NA	NA	NA	NA	NA	NA	NA	NA	NA	NA	NA	NA	NA	NA	NA
PVP01_0531500	36	0.0106667	0	734	31	0.00918519	0	593	NA	NA	NA	NA	NA	NA	NA	NA	99	0.0385214	0	543	86	0.033463	0	415
PVP01_0406500	35	0.0103704	0	735	39	0.0115556	0	588	NA	NA	NA	NA	NA	NA	NA	NA	NA	NA	NA	NA	NA	NA	NA	NA
PVP01_1410400	35	0.0103704	0	735	33	0.00977778	0	591	NA	NA	NA	NA	NA	NA	NA	NA	NA	NA	NA	NA	NA	NA	NA	NA
PVP01_0601600	34	0.0100741	0	736	0	0	0	0	NA	NA	NA	NA	NA	NA	NA	NA	NA	NA	NA	NA	NA	NA	NA	NA
PVP01_1244000	34	0.0100741	0	736	32	0.00948148	0	592	NA	NA	NA	NA	NA	NA	NA	NA	51	0.0198444	0	583	0	0	0	0
PVP01_1339400	34	0.0100741	0	736	0	0	0	0	NA	NA	NA	NA	NA	NA	NA	NA	48	0.018677	0	586	0	0	0	0
PVP01_0104700	33	0.00977778	0	737	30	0.00888889	0	594	NA	NA	NA	NA	NA	NA	NA	NA	NA	NA	NA	NA	NA	NA	NA	NA
PVP01_0817200	33	0.00977778	0	737	0	0	0	0	NA	NA	NA	NA	NA	NA	NA	NA	NA	NA	NA	NA	NA	NA	NA	NA
PVP01_1316700	32	0.00948148	0	738	24	0.00711111	0	596	NA	NA	NA	NA	NA	NA	NA	NA	NA	NA	NA	NA	NA	NA	NA	NA
PVP01_1248900	31	0.00918519	0	739	0	0	0	0	NA	NA	NA	NA	NA	NA	NA	NA	NA	NA	NA	NA	NA	NA	NA	NA
PVP01_1301700	31	0.00918519	0	739	17	0.00503704	0	600	NA	NA	NA	NA	NA	NA	NA	NA	NA	NA	NA	NA	NA	NA	NA	NA
PVP01_0940900	30	0.00888889	0	740	27	0.008	0	595	11	0.00274863	0	694	0	0	0	0	NA	NA	NA	NA	NA	NA	NA	NA
PVP01_1140800	29	0.00859259	0	741	0	0	0	0	NA	NA	NA	NA	NA	NA	NA	NA	NA	NA	NA	NA	NA	NA	NA	NA
PVP01_0108600	27	0.008	0	742	0	0	0	0	NA	NA	NA	NA	NA	NA	NA	NA	NA	NA	NA	NA	NA	NA	NA	NA
PVP01_0616100	27	0.008	0	742	0	0	0	0	52	0.0129935	0	671	0	0	0	0	84	0.0326848	0	558	64	0.0249027	0	434
PVP01_1203700	27	0.008	0	742	0	0	0	0	NA	NA	NA	NA	NA	NA	NA	NA	NA	NA	NA	NA	NA	NA	NA	NA
PVP01_1469500	24	0.00711111	0	743	0	0	0	0	NA	NA	NA	NA	NA	NA	NA	NA	NA	NA	NA	NA	NA	NA	NA	NA
PVP01_1208800	22	0.00651852	0	744	22	0.00651852	0	597	NA	NA	NA	NA	NA	NA	NA	NA	NA	NA	NA	NA	NA	NA	NA	NA
PVP01_0000030	21	0.00622222	0	745	21	0.00622222	0	598	NA	NA	NA	NA	NA	NA	NA	NA	NA	NA	NA	NA	NA	NA	NA	NA
PVP01_1218900	21	0.00622222	0	745	0	0	0	0	NA	NA	NA	NA	NA	NA	NA	NA	14	0.00544747	0	606	0	0	0	0
PVP01_1401300	21	0.00622222	0	745	19	0.00562963	0	599	NA	NA	NA	NA	NA	NA	NA	NA	NA	NA	NA	NA	NA	NA	NA	NA
PVP01_1247900	20	0.00592593	0	746	0	0	0	0	NA	NA	NA	NA	NA	NA	NA	NA	NA	NA	NA	NA	NA	NA	NA	NA
PVP01_1340300	13	0.00385185	0	747	13	0.00385185	0	601	NA	NA	NA	NA	NA	NA	NA	NA	NA	NA	NA	NA	NA	NA	NA	NA
PVP01_1234800	0	0	0	0	212	0.0628148	0	456	NA	NA	NA	NA	NA	NA	NA	NA	NA	NA	NA	NA	NA	NA	NA	NA
PVP01_0528600	0	0	0	0	193	0.0571852	0	473	NA	NA	NA	NA	NA	NA	NA	NA	136	0.0529183	0	512	0	0	0	0
PVP01_1124300	0	0	0	0	137	0.0405926	0	516	NA	NA	NA	NA	NA	NA	NA	NA	85	0.0330739	0	557	0	0	0	0
PVP01_0509600	0	0	0	0	132	0.0391111	0	519	NA	NA	NA	NA	NA	NA	NA	NA	NA	NA	NA	NA	NA	NA	NA	NA
PVP01_0416800	0	0	0	0	101	0.0299259	0	543	NA	NA	NA	NA	NA	NA	NA	NA	NA	NA	NA	NA	NA	NA	NA	NA
PVP01_0608100	0	0	0	0	70	0.0207407	0	565	190	0.0474763	0	555	193	0.0482259	0	405	NA	NA	NA	NA	NA	NA	NA	NA
PVP01_0115000	0	0	0	0	63	0.0186667	0	570	NA	NA	NA	NA	NA	NA	NA	NA	NA	NA	NA	NA	NA	NA	NA	NA
PVP01_0836600	0	0	0	0	48	0.0142222	0	583	NA	NA	NA	NA	NA	NA	NA	NA	NA	NA	NA	NA	NA	NA	NA	NA
PVP01_0831500	0	0	0	0	37	0.010963	0	589	NA	NA	NA	NA	NA	NA	NA	NA	NA	NA	NA	NA	NA	NA	NA	NA
PVP01_0914000	NA	NA	NA	NA	NA	NA	NA	NA	789	0.197151	0	225	600	0.149925	0	194	373	0.145136	0	329	311	0.121012	0	268
PVP01_1450700	NA	NA	NA	NA	NA	NA	NA	NA	497	0.124188	0	343	475	0.118691	0	238	NA	NA	NA	NA	NA	NA	NA	NA
PVP01_1205800	NA	NA	NA	NA	NA	NA	NA	NA	491	0.122689	0	346	0	0	0	0	211	0.0821012	0	449	0	0	0	0
PVP01_0806800	NA	NA	NA	NA	NA	NA	NA	NA	473	0.118191	0	358	0	0	0	0	214	0.0832685	0	447	0	0	0	0
PVP01_0613800	NA	NA	NA	NA	NA	NA	NA	NA	464	0.115942	0	362	0	0	0	0	490	0.190661	0	276	0	0	0	0
PVP01_1463300	NA	NA	NA	NA	NA	NA	NA	NA	399	0.0997002	0	401	407	0.101699	0	266	284	0.110506	0	384	292	0.113619	0	279
PVP01_1205100	NA	NA	NA	NA	NA	NA	NA	NA	396	0.0989505	0	403	396	0.0989505	0	273	274	0.106615	0	393	276	0.107393	0	288
PVP01_1258800	NA	NA	NA	NA	NA	NA	NA	NA	393	0.0982009	0	406	311	0.0777111	0	323	NA	NA	NA	NA	NA	NA	NA	NA
PVP01_1450800	NA	NA	NA	NA	NA	NA	NA	NA	391	0.0977012	0	407	163	0.0407296	0	428	NA	NA	NA	NA	NA	NA	NA	NA
PVP01_1261100	NA	NA	NA	NA	NA	NA	NA	NA	389	0.0972014	0	409	333	0.0832084	0	309	NA	NA	NA	NA	NA	NA	NA	NA
PVP01_1010400	NA	NA	NA	NA	NA	NA	NA	NA	384	0.095952	0	412	0	0	0	0	NA	NA	NA	NA	NA	NA	NA	NA
PVP01_1324200	NA	NA	NA	NA	NA	NA	NA	NA	355	0.0887056	0	432	355	0.0887056	0	298	NA	NA	NA	NA	NA	NA	NA	NA
PVP01_0320200	NA	NA	NA	NA	NA	NA	NA	NA	353	0.0882059	0	434	336	0.083958	0	308	NA	NA	NA	NA	NA	NA	NA	NA
PVP01_1329600	NA	NA	NA	NA	NA	NA	NA	NA	347	0.0867066	0	438	310	0.0774613	0	324	NA	NA	NA	NA	NA	NA	NA	NA
PVP01_1420800	NA	NA	NA	NA	NA	NA	NA	NA	307	0.0767116	0	464	285	0.0712144	0	341	240	0.0933852	0	421	0	0	0	0
PVP01_1303100	NA	NA	NA	NA	NA	NA	NA	NA	305	0.0762119	0	466	133	0.0332334	0	452	191	0.0743191	0	464	0	0	0	0
PVP01_0917400	NA	NA	NA	NA	NA	NA	NA	NA	299	0.0747126	0	470	0	0	0	0	240	0.0933852	0	421	0	0	0	0
PVP01_1242000	NA	NA	NA	NA	NA	NA	NA	NA	298	0.0744628	0	471	0	0	0	0	NA	NA	NA	NA	NA	NA	NA	NA
PVP01_0312900	NA	NA	NA	NA	NA	NA	NA	NA	291	0.0727136	0	476	0	0	0	0	NA	NA	NA	NA	NA	NA	NA	NA
PVP01_1451900	NA	NA	NA	NA	NA	NA	NA	NA	286	0.0714643	0	479	280	0.069965	0	343	NA	NA	NA	NA	NA	NA	NA	NA
PVP01_API02800	NA	NA	NA	NA	NA	NA	NA	NA	283	0.0707146	0	482	284	0.0709645	0	342	219	0.085214	0	442	219	0.085214	0	332
PVP01_1453300	NA	NA	NA	NA	NA	NA	NA	NA	275	0.0687156	0	488	0	0	0	0	NA	NA	NA	NA	NA	NA	NA	NA
PVP01_1238600	NA	NA	NA	NA	NA	NA	NA	NA	271	0.0677161	0	490	0	0	0	0	145	0.0564202	0	504	0	0	0	0
PVP01_1144700	NA	NA	NA	NA	NA	NA	NA	NA	265	0.0662169	0	496	0	0	0	0	NA	NA	NA	NA	NA	NA	NA	NA
PVP01_0706000	NA	NA	NA	NA	NA	NA	NA	NA	260	0.0649675	0	501	0	0	0	0	NA	NA	NA	NA	NA	NA	NA	NA
PVP01_1133700	NA	NA	NA	NA	NA	NA	NA	NA	244	0.0609695	0	514	244	0.0609695	0	370	324	0.12607	0	357	324	0.12607	0	260
PVP01_0317900	NA	NA	NA	NA	NA	NA	NA	NA	241	0.0602199	0	517	192	0.047976	0	406	NA	NA	NA	NA	NA	NA	NA	NA
PVP01_0925200	NA	NA	NA	NA	NA	NA	NA	NA	236	0.0589705	0	520	237	0.0592204	0	375	192	0.0747082	0	463	192	0.0747082	0	347
PVP01_0807400	NA	NA	NA	NA	NA	NA	NA	NA	233	0.0582209	0	522	237	0.0592204	0	375	NA	NA	NA	NA	NA	NA	NA	NA
PVP01_1412800	NA	NA	NA	NA	NA	NA	NA	NA	230	0.0574713	0	525	0	0	0	0	NA	NA	NA	NA	NA	NA	NA	NA
PVP01_1234300	NA	NA	NA	NA	NA	NA	NA	NA	227	0.0567216	0	528	0	0	0	0	NA	NA	NA	NA	NA	NA	NA	NA
PVP01_0726100	NA	NA	NA	NA	NA	NA	NA	NA	223	0.0557221	0	530	0	0	0	0	204	0.0793774	0	456	143	0.055642	0	380
PVP01_1202500	NA	NA	NA	NA	NA	NA	NA	NA	223	0.0557221	0	530	192	0.047976	0	406	143	0.055642	0	506	0	0	0	0
PVP01_0832800	NA	NA	NA	NA	NA	NA	NA	NA	218	0.0544728	0	534	213	0.0532234	0	390	NA	NA	NA	NA	NA	NA	NA	NA
PVP01_1424300	NA	NA	NA	NA	NA	NA	NA	NA	216	0.053973	0	535	0	0	0	0	81	0.0315175	0	561	0	0	0	0
PVP01_1105800	NA	NA	NA	NA	NA	NA	NA	NA	209	0.0522239	0	540	94	0.0234883	0	481	NA	NA	NA	NA	NA	NA	NA	NA
PVP01_0307300	NA	NA	NA	NA	NA	NA	NA	NA	200	0.049975	0	547	173	0.0432284	0	421	NA	NA	NA	NA	NA	NA	NA	NA
PVP01_0405400	NA	NA	NA	NA	NA	NA	NA	NA	200	0.049975	0	547	0	0	0	0	NA	NA	NA	NA	NA	NA	NA	NA
PVP01_0118000	NA	NA	NA	NA	NA	NA	NA	NA	197	0.0492254	0	549	0	0	0	0	NA	NA	NA	NA	NA	NA	NA	NA
PVP01_1131700	NA	NA	NA	NA	NA	NA	NA	NA	197	0.0492254	0	549	0	0	0	0	NA	NA	NA	NA	NA	NA	NA	NA
PVP01_0725800	NA	NA	NA	NA	NA	NA	NA	NA	194	0.0484758	0	551	0	0	0	0	NA	NA	NA	NA	NA	NA	NA	NA
PVP01_1258700	NA	NA	NA	NA	NA	NA	NA	NA	192	0.047976	0	553	0	0	0	0	65	0.0252918	0	573	0	0	0	0
PVP01_0117000	NA	NA	NA	NA	NA	NA	NA	NA	187	0.0467266	0	557	0	0	0	0	NA	NA	NA	NA	NA	NA	NA	NA
PVP01_0916450	NA	NA	NA	NA	NA	NA	NA	NA	187	0.0467266	0	557	0	0	0	0	NA	NA	NA	NA	NA	NA	NA	NA
PVP01_1458800	NA	NA	NA	NA	NA	NA	NA	NA	187	0.0467266	0	557	0	0	0	0	NA	NA	NA	NA	NA	NA	NA	NA
PVP01_1259800	NA	NA	NA	NA	NA	NA	NA	NA	180	0.0449775	0	563	176	0.043978	0	418	153	0.0595331	0	497	150	0.0583658	0	375
PVP01_0803100	NA	NA	NA	NA	NA	NA	NA	NA	175	0.0437281	0	568	170	0.0424788	0	422	137	0.0533074	0	511	137	0.0533074	0	383
PVP01_0922100	NA	NA	NA	NA	NA	NA	NA	NA	173	0.0432284	0	570	0	0	0	0	NA	NA	NA	NA	NA	NA	NA	NA
PVP01_1320800	NA	NA	NA	NA	NA	NA	NA	NA	172	0.0429785	0	571	129	0.0322339	0	456	NA	NA	NA	NA	NA	NA	NA	NA
PVP01_1343100	NA	NA	NA	NA	NA	NA	NA	NA	172	0.0429785	0	571	0	0	0	0	NA	NA	NA	NA	NA	NA	NA	NA
PVP01_1226100	NA	NA	NA	NA	NA	NA	NA	NA	171	0.0427286	0	572	0	0	0	0	NA	NA	NA	NA	NA	NA	NA	NA
PVP01_0314700	NA	NA	NA	NA	NA	NA	NA	NA	170	0.0424788	0	573	0	0	0	0	NA	NA	NA	NA	NA	NA	NA	NA
PVP01_1309400	NA	NA	NA	NA	NA	NA	NA	NA	169	0.0422289	0	574	170	0.0424788	0	422	106	0.0412451	0	536	104	0.0404669	0	405
PVP01_0926200	NA	NA	NA	NA	NA	NA	NA	NA	168	0.041979	0	575	164	0.0409795	0	427	93	0.0361868	0	549	89	0.0346303	0	413
PVP01_1465300	NA	NA	NA	NA	NA	NA	NA	NA	168	0.041979	0	575	101	0.0252374	0	474	NA	NA	NA	NA	NA	NA	NA	NA
PVP01_0607500	NA	NA	NA	NA	NA	NA	NA	NA	161	0.0402299	0	581	161	0.0402299	0	430	267	0.103891	0	398	269	0.104669	0	293
PVP01_0933700	NA	NA	NA	NA	NA	NA	NA	NA	158	0.0394803	0	584	239	0.0597201	0	374	NA	NA	NA	NA	NA	NA	NA	NA
PVP01_0913600	NA	NA	NA	NA	NA	NA	NA	NA	149	0.0372314	0	590	152	0.037981	0	436	141	0.0548638	0	508	143	0.055642	0	380
PVP01_1464500	NA	NA	NA	NA	NA	NA	NA	NA	148	0.0369815	0	591	0	0	0	0	82	0.0319066	0	560	0	0	0	0
PVP01_0529000	NA	NA	NA	NA	NA	NA	NA	NA	146	0.0364818	0	593	107	0.0267366	0	471	NA	NA	NA	NA	NA	NA	NA	NA
PVP01_0302900	NA	NA	NA	NA	NA	NA	NA	NA	142	0.0354823	0	595	0	0	0	0	NA	NA	NA	NA	NA	NA	NA	NA
PVP01_0420800	NA	NA	NA	NA	NA	NA	NA	NA	141	0.0352324	0	596	0	0	0	0	168	0.0653697	0	484	0	0	0	0
PVP01_1458100	NA	NA	NA	NA	NA	NA	NA	NA	139	0.0347326	0	598	0	0	0	0	NA	NA	NA	NA	NA	NA	NA	NA
PVP01_1119700	NA	NA	NA	NA	NA	NA	NA	NA	138	0.0344828	0	599	0	0	0	0	NA	NA	NA	NA	NA	NA	NA	NA
PVP01_1331400	NA	NA	NA	NA	NA	NA	NA	NA	138	0.0344828	0	599	99	0.0247376	0	476	NA	NA	NA	NA	NA	NA	NA	NA
PVP01_0835400	NA	NA	NA	NA	NA	NA	NA	NA	137	0.0342329	0	600	137	0.0342329	0	449	NA	NA	NA	NA	NA	NA	NA	NA
PVP01_0310100	NA	NA	NA	NA	NA	NA	NA	NA	134	0.0334833	0	602	0	0	0	0	NA	NA	NA	NA	NA	NA	NA	NA
PVP01_0615200	NA	NA	NA	NA	NA	NA	NA	NA	132	0.0329835	0	603	129	0.0322339	0	456	79	0.0307393	0	563	77	0.0299611	0	424
PVP01_1132400	NA	NA	NA	NA	NA	NA	NA	NA	126	0.0314843	0	609	91	0.0227386	0	484	NA	NA	NA	NA	NA	NA	NA	NA
PVP01_1316500	NA	NA	NA	NA	NA	NA	NA	NA	125	0.0312344	0	610	0	0	0	0	134	0.0521401	0	514	0	0	0	0
PVP01_0837800	NA	NA	NA	NA	NA	NA	NA	NA	124	0.0309845	0	611	69	0.0172414	0	499	149	0.0579766	0	500	0	0	0	0
PVP01_1418100	NA	NA	NA	NA	NA	NA	NA	NA	124	0.0309845	0	611	0	0	0	0	NA	NA	NA	NA	NA	NA	NA	NA
PVP01_0320300	NA	NA	NA	NA	NA	NA	NA	NA	123	0.0307346	0	612	126	0.0314843	0	458	NA	NA	NA	NA	NA	NA	NA	NA
PVP01_0532000	NA	NA	NA	NA	NA	NA	NA	NA	123	0.0307346	0	612	82	0.0204898	0	490	85	0.0330739	0	557	0	0	0	0
PVP01_1419600	NA	NA	NA	NA	NA	NA	NA	NA	121	0.0302349	0	613	0	0	0	0	131	0.0509728	0	517	0	0	0	0
PVP01_1118900	NA	NA	NA	NA	NA	NA	NA	NA	119	0.0297351	0	614	0	0	0	0	NA	NA	NA	NA	NA	NA	NA	NA
PVP01_1230900	NA	NA	NA	NA	NA	NA	NA	NA	117	0.0292354	0	615	0	0	0	0	NA	NA	NA	NA	NA	NA	NA	NA
PVP01_0118100	NA	NA	NA	NA	NA	NA	NA	NA	116	0.0289855	0	616	0	0	0	0	82	0.0319066	0	560	0	0	0	0
PVP01_0603700	NA	NA	NA	NA	NA	NA	NA	NA	115	0.0287356	0	617	115	0.0287356	0	465	121	0.0470817	0	525	122	0.0474708	0	394
PVP01_0944100	NA	NA	NA	NA	NA	NA	NA	NA	115	0.0287356	0	617	0	0	0	0	105	0.040856	0	537	0	0	0	0
PVP01_1212600	NA	NA	NA	NA	NA	NA	NA	NA	115	0.0287356	0	617	91	0.0227386	0	484	NA	NA	NA	NA	NA	NA	NA	NA
PVP01_0119500	NA	NA	NA	NA	NA	NA	NA	NA	112	0.027986	0	620	0	0	0	0	NA	NA	NA	NA	NA	NA	NA	NA
PVP01_0622100	NA	NA	NA	NA	NA	NA	NA	NA	112	0.027986	0	620	0	0	0	0	NA	NA	NA	NA	NA	NA	NA	NA
PVP01_1421300	NA	NA	NA	NA	NA	NA	NA	NA	109	0.0272364	0	622	0	0	0	0	NA	NA	NA	NA	NA	NA	NA	NA
PVP01_1005400	NA	NA	NA	NA	NA	NA	NA	NA	108	0.0269865	0	623	0	0	0	0	NA	NA	NA	NA	NA	NA	NA	NA
PVP01_1007600	NA	NA	NA	NA	NA	NA	NA	NA	108	0.0269865	0	623	0	0	0	0	NA	NA	NA	NA	NA	NA	NA	NA
PVP01_1136100	NA	NA	NA	NA	NA	NA	NA	NA	108	0.0269865	0	623	0	0	0	0	NA	NA	NA	NA	NA	NA	NA	NA
PVP01_0420600	NA	NA	NA	NA	NA	NA	NA	NA	106	0.0264868	0	624	0	0	0	0	NA	NA	NA	NA	NA	NA	NA	NA
PVP01_0919800	NA	NA	NA	NA	NA	NA	NA	NA	106	0.0264868	0	624	0	0	0	0	NA	NA	NA	NA	NA	NA	NA	NA
PVP01_0511400	NA	NA	NA	NA	NA	NA	NA	NA	104	0.025987	0	626	0	0	0	0	NA	NA	NA	NA	NA	NA	NA	NA
PVP01_0709200	NA	NA	NA	NA	NA	NA	NA	NA	103	0.0257371	0	627	96	0.023988	0	479	55	0.0214008	0	580	50	0.0194553	0	442
PVP01_1246200	NA	NA	NA	NA	NA	NA	NA	NA	103	0.0257371	0	627	66	0.0164917	0	502	147	0.0571984	0	502	0	0	0	0
PVP01_0614600	NA	NA	NA	NA	NA	NA	NA	NA	101	0.0252374	0	629	0	0	0	0	NA	NA	NA	NA	NA	NA	NA	NA
PVP01_1233400	NA	NA	NA	NA	NA	NA	NA	NA	100	0.0249875	0	630	0	0	0	0	NA	NA	NA	NA	NA	NA	NA	NA
PVP01_0817500	NA	NA	NA	NA	NA	NA	NA	NA	99	0.0247376	0	631	99	0.0247376	0	476	NA	NA	NA	NA	NA	NA	NA	NA
PVP01_1208600	NA	NA	NA	NA	NA	NA	NA	NA	99	0.0247376	0	631	98	0.0244878	0	477	78	0.0303502	0	564	77	0.0299611	0	424
PVP01_1442500	NA	NA	NA	NA	NA	NA	NA	NA	99	0.0247376	0	631	80	0.01999	0	492	83	0.0322957	0	559	74	0.0287938	0	427
PVP01_0507600	NA	NA	NA	NA	NA	NA	NA	NA	98	0.0244878	0	632	0	0	0	0	NA	NA	NA	NA	NA	NA	NA	NA
PVP01_1257500	NA	NA	NA	NA	NA	NA	NA	NA	97	0.0242379	0	633	0	0	0	0	153	0.0595331	0	497	0	0	0	0
PVP01_1132800	NA	NA	NA	NA	NA	NA	NA	NA	94	0.0234883	0	636	0	0	0	0	NA	NA	NA	NA	NA	NA	NA	NA
PVP01_0114200	NA	NA	NA	NA	NA	NA	NA	NA	93	0.0232384	0	637	65	0.0162419	0	503	NA	NA	NA	NA	NA	NA	NA	NA
PVP01_0914100	NA	NA	NA	NA	NA	NA	NA	NA	92	0.0229885	0	638	41	0.0102449	0	520	NA	NA	NA	NA	NA	NA	NA	NA
PVP01_1265900	NA	NA	NA	NA	NA	NA	NA	NA	89	0.0222389	0	640	52	0.0129935	0	513	37	0.0143969	0	595	0	0	0	0
PVP01_1345200	NA	NA	NA	NA	NA	NA	NA	NA	89	0.0222389	0	640	86	0.0214893	0	488	NA	NA	NA	NA	NA	NA	NA	NA
PVP01_0615900	NA	NA	NA	NA	NA	NA	NA	NA	86	0.0214893	0	642	0	0	0	0	43	0.0167315	0	589	0	0	0	0
PVP01_1119000	NA	NA	NA	NA	NA	NA	NA	NA	86	0.0214893	0	642	0	0	0	0	NA	NA	NA	NA	NA	NA	NA	NA
PVP01_1325900	NA	NA	NA	NA	NA	NA	NA	NA	80	0.01999	0	646	72	0.017991	0	497	NA	NA	NA	NA	NA	NA	NA	NA
PVP01_1249100	NA	NA	NA	NA	NA	NA	NA	NA	78	0.0194903	0	647	58	0.0144928	0	508	NA	NA	NA	NA	NA	NA	NA	NA
PVP01_0905900	NA	NA	NA	NA	NA	NA	NA	NA	77	0.0192404	0	648	0	0	0	0	92	0.0357977	0	550	82	0.0319066	0	419
PVP01_1264700	NA	NA	NA	NA	NA	NA	NA	NA	76	0.0189905	0	649	0	0	0	0	NA	NA	NA	NA	NA	NA	NA	NA
PVP01_1221300	NA	NA	NA	NA	NA	NA	NA	NA	74	0.0184908	0	650	0	0	0	0	NA	NA	NA	NA	NA	NA	NA	NA
PVP01_1340800	NA	NA	NA	NA	NA	NA	NA	NA	74	0.0184908	0	650	0	0	0	0	NA	NA	NA	NA	NA	NA	NA	NA
PVP01_0603300	NA	NA	NA	NA	NA	NA	NA	NA	73	0.0182409	0	651	0	0	0	0	NA	NA	NA	NA	NA	NA	NA	NA
PVP01_0109100	NA	NA	NA	NA	NA	NA	NA	NA	72	0.017991	0	652	49	0.0122439	0	516	NA	NA	NA	NA	NA	NA	NA	NA
PVP01_1442700	NA	NA	NA	NA	NA	NA	NA	NA	72	0.017991	0	652	0	0	0	0	NA	NA	NA	NA	NA	NA	NA	NA
PVP01_0104800	NA	NA	NA	NA	NA	NA	NA	NA	68	0.0169915	0	656	60	0.0149925	0	506	NA	NA	NA	NA	NA	NA	NA	NA
PVP01_0606100	NA	NA	NA	NA	NA	NA	NA	NA	68	0.0169915	0	656	67	0.0167416	0	501	63	0.0245136	0	575	61	0.0237354	0	436
PVP01_0520700	NA	NA	NA	NA	NA	NA	NA	NA	65	0.0162419	0	659	57	0.0142429	0	509	NA	NA	NA	NA	NA	NA	NA	NA
PVP01_1023800	NA	NA	NA	NA	NA	NA	NA	NA	65	0.0162419	0	659	0	0	0	0	NA	NA	NA	NA	NA	NA	NA	NA
PVP01_0109400	NA	NA	NA	NA	NA	NA	NA	NA	64	0.015992	0	660	0	0	0	0	36	0.0140078	0	596	0	0	0	0
PVP01_0208000	NA	NA	NA	NA	NA	NA	NA	NA	63	0.0157421	0	661	62	0.0154923	0	505	NA	NA	NA	NA	NA	NA	NA	NA
PVP01_0909500	NA	NA	NA	NA	NA	NA	NA	NA	62	0.0154923	0	662	0	0	0	0	NA	NA	NA	NA	NA	NA	NA	NA
PVP01_1462900	NA	NA	NA	NA	NA	NA	NA	NA	60	0.0149925	0	664	60	0.0149925	0	506	NA	NA	NA	NA	NA	NA	NA	NA
PVP01_1259100	NA	NA	NA	NA	NA	NA	NA	NA	59	0.0147426	0	665	0	0	0	0	NA	NA	NA	NA	NA	NA	NA	NA
PVP01_1109300	NA	NA	NA	NA	NA	NA	NA	NA	57	0.0142429	0	666	0	0	0	0	NA	NA	NA	NA	NA	NA	NA	NA
PVP01_0207400	NA	NA	NA	NA	NA	NA	NA	NA	56	0.013993	0	667	0	0	0	0	35	0.0136187	0	597	0	0	0	0
PVP01_1454000	NA	NA	NA	NA	NA	NA	NA	NA	56	0.013993	0	667	59	0.0147426	0	507	NA	NA	NA	NA	NA	NA	NA	NA
PVP01_0314900	NA	NA	NA	NA	NA	NA	NA	NA	55	0.0137431	0	668	39	0.00974513	0	521	NA	NA	NA	NA	NA	NA	NA	NA
PVP01_1203800	NA	NA	NA	NA	NA	NA	NA	NA	55	0.0137431	0	668	0	0	0	0	NA	NA	NA	NA	NA	NA	NA	NA
PVP01_1235700	NA	NA	NA	NA	NA	NA	NA	NA	54	0.0134933	0	669	0	0	0	0	NA	NA	NA	NA	NA	NA	NA	NA
PVP01_1255700	NA	NA	NA	NA	NA	NA	NA	NA	54	0.0134933	0	669	0	0	0	0	NA	NA	NA	NA	NA	NA	NA	NA
PVP01_1016600	NA	NA	NA	NA	NA	NA	NA	NA	53	0.0132434	0	670	51	0.0127436	0	514	NA	NA	NA	NA	NA	NA	NA	NA
PVP01_0919100	NA	NA	NA	NA	NA	NA	NA	NA	52	0.0129935	0	671	54	0.0134933	0	511	NA	NA	NA	NA	NA	NA	NA	NA
PVP01_0610200	NA	NA	NA	NA	NA	NA	NA	NA	51	0.0127436	0	672	0	0	0	0	NA	NA	NA	NA	NA	NA	NA	NA
PVP01_0119200	NA	NA	NA	NA	NA	NA	NA	NA	50	0.0124937	0	673	0	0	0	0	NA	NA	NA	NA	NA	NA	NA	NA
PVP01_0947800	NA	NA	NA	NA	NA	NA	NA	NA	50	0.0124937	0	673	28	0.0069965	0	527	NA	NA	NA	NA	NA	NA	NA	NA
PVP01_0422100	NA	NA	NA	NA	NA	NA	NA	NA	49	0.0122439	0	674	0	0	0	0	NA	NA	NA	NA	NA	NA	NA	NA
PVP01_0603200	NA	NA	NA	NA	NA	NA	NA	NA	49	0.0122439	0	674	50	0.0124937	0	515	NA	NA	NA	NA	NA	NA	NA	NA
PVP01_1426900	NA	NA	NA	NA	NA	NA	NA	NA	49	0.0122439	0	674	0	0	0	0	NA	NA	NA	NA	NA	NA	NA	NA
PVP01_0818300	NA	NA	NA	NA	NA	NA	NA	NA	48	0.011994	0	675	44	0.0109945	0	519	NA	NA	NA	NA	NA	NA	NA	NA
PVP01_1444000	NA	NA	NA	NA	NA	NA	NA	NA	46	0.0114942	0	677	0	0	0	0	NA	NA	NA	NA	NA	NA	NA	NA
PVP01_0809900	NA	NA	NA	NA	NA	NA	NA	NA	44	0.0109945	0	678	44	0.0109945	0	519	28	0.0108949	0	600	29	0.0112841	0	454
PVP01_1403400	NA	NA	NA	NA	NA	NA	NA	NA	44	0.0109945	0	678	35	0.00874563	0	524	NA	NA	NA	NA	NA	NA	NA	NA
PVP01_1107700	NA	NA	NA	NA	NA	NA	NA	NA	42	0.0104948	0	679	0	0	0	0	NA	NA	NA	NA	NA	NA	NA	NA
PVP01_0833700	NA	NA	NA	NA	NA	NA	NA	NA	41	0.0102449	0	680	41	0.0102449	0	520	NA	NA	NA	NA	NA	NA	NA	NA
PVP01_1239100	NA	NA	NA	NA	NA	NA	NA	NA	41	0.0102449	0	680	0	0	0	0	53	0.0206226	0	581	0	0	0	0
PVP01_1335600	NA	NA	NA	NA	NA	NA	NA	NA	37	0.00924538	0	681	0	0	0	0	NA	NA	NA	NA	NA	NA	NA	NA
PVP01_0304700	NA	NA	NA	NA	NA	NA	NA	NA	33	0.00824588	0	682	30	0.00749625	0	526	23	0.00894942	0	602	22	0.00856031	0	459
PVP01_0321100	NA	NA	NA	NA	NA	NA	NA	NA	33	0.00824588	0	682	0	0	0	0	NA	NA	NA	NA	NA	NA	NA	NA
PVP01_1264400	NA	NA	NA	NA	NA	NA	NA	NA	32	0.007996	0	683	0	0	0	0	NA	NA	NA	NA	NA	NA	NA	NA
PVP01_0411300	NA	NA	NA	NA	NA	NA	NA	NA	31	0.00774613	0	684	31	0.00774613	0	525	NA	NA	NA	NA	NA	NA	NA	NA
PVP01_0939700	NA	NA	NA	NA	NA	NA	NA	NA	30	0.00749625	0	685	11	0.00274863	0	533	NA	NA	NA	NA	NA	NA	NA	NA
PVP01_1124600	NA	NA	NA	NA	NA	NA	NA	NA	30	0.00749625	0	685	0	0	0	0	38	0.014786	0	594	0	0	0	0
PVP01_1426300	NA	NA	NA	NA	NA	NA	NA	NA	27	0.00674663	0	686	0	0	0	0	15	0.00583658	0	605	0	0	0	0
PVP01_1460800	NA	NA	NA	NA	NA	NA	NA	NA	27	0.00674663	0	686	0	0	0	0	NA	NA	NA	NA	NA	NA	NA	NA
PVP01_0413500	NA	NA	NA	NA	NA	NA	NA	NA	25	0.00624688	0	688	27	0.00674663	0	528	NA	NA	NA	NA	NA	NA	NA	NA
PVP01_0106200	NA	NA	NA	NA	NA	NA	NA	NA	21	0.00524738	0	689	19	0.00474763	0	531	NA	NA	NA	NA	NA	NA	NA	NA
PVP01_0616600	NA	NA	NA	NA	NA	NA	NA	NA	20	0.0049975	0	690	0	0	0	0	NA	NA	NA	NA	NA	NA	NA	NA
PVP01_0410200	NA	NA	NA	NA	NA	NA	NA	NA	15	0.00374813	0	691	12	0.0029985	0	532	NA	NA	NA	NA	NA	NA	NA	NA
PVP01_0815800	NA	NA	NA	NA	NA	NA	NA	NA	14	0.00349825	0	692	0	0	0	0	NA	NA	NA	NA	NA	NA	NA	NA
PVP01_0525900	NA	NA	NA	NA	NA	NA	NA	NA	12	0.0029985	0	693	0	0	0	0	NA	NA	NA	NA	NA	NA	NA	NA
PVP01_0119400	NA	NA	NA	NA	NA	NA	NA	NA	11	0.00274863	0	694	0	0	0	0	NA	NA	NA	NA	NA	NA	NA	NA
PVP01_1301600	NA	NA	NA	NA	NA	NA	NA	NA	11	0.00274863	0	694	11	0.00274863	0	533	NA	NA	NA	NA	NA	NA	NA	NA
PVP01_1449400	NA	NA	NA	NA	NA	NA	NA	NA	8	0.001999	0	695	8	0.001999	0	534	NA	NA	NA	NA	NA	NA	NA	NA
PVP01_0214800	NA	NA	NA	NA	NA	NA	NA	NA	0	0	0	0	19	0.00474763	0	531	NA	NA	NA	NA	NA	NA	NA	NA
PVP01_1437300	NA	NA	NA	NA	NA	NA	NA	NA	NA	NA	NA	NA	NA	NA	NA	NA	238	0.092607	0	423	274	0.106615	0	290
PVP01_1220300	NA	NA	NA	NA	NA	NA	NA	NA	NA	NA	NA	NA	NA	NA	NA	NA	213	0.0828794	0	448	0	0	0	0
PVP01_1224700	NA	NA	NA	NA	NA	NA	NA	NA	NA	NA	NA	NA	NA	NA	NA	NA	210	0.0817121	0	450	185	0.0719844	0	353
PVP01_1433500	NA	NA	NA	NA	NA	NA	NA	NA	NA	NA	NA	NA	NA	NA	NA	NA	207	0.0805447	0	453	0	0	0	0
PVP01_1309500	NA	NA	NA	NA	NA	NA	NA	NA	NA	NA	NA	NA	NA	NA	NA	NA	205	0.0797665	0	455	0	0	0	0
PVP01_1449300	NA	NA	NA	NA	NA	NA	NA	NA	NA	NA	NA	NA	NA	NA	NA	NA	199	0.0774319	0	459	0	0	0	0
PVP01_0113700	NA	NA	NA	NA	NA	NA	NA	NA	NA	NA	NA	NA	NA	NA	NA	NA	189	0.0735409	0	466	170	0.0661479	0	364
PVP01_0313100	NA	NA	NA	NA	NA	NA	NA	NA	NA	NA	NA	NA	NA	NA	NA	NA	180	0.0700389	0	473	0	0	0	0
PVP01_0528700	NA	NA	NA	NA	NA	NA	NA	NA	NA	NA	NA	NA	NA	NA	NA	NA	179	0.0696498	0	474	173	0.0673152	0	361
PVP01_0807100	NA	NA	NA	NA	NA	NA	NA	NA	NA	NA	NA	NA	NA	NA	NA	NA	177	0.0688716	0	475	0	0	0	0
PVP01_0813400	NA	NA	NA	NA	NA	NA	NA	NA	NA	NA	NA	NA	NA	NA	NA	NA	157	0.0610895	0	493	157	0.0610895	0	372
PVP01_1115600	NA	NA	NA	NA	NA	NA	NA	NA	NA	NA	NA	NA	NA	NA	NA	NA	153	0.0595331	0	497	141	0.0548638	0	381
PVP01_0206100	NA	NA	NA	NA	NA	NA	NA	NA	NA	NA	NA	NA	NA	NA	NA	NA	147	0.0571984	0	502	140	0.0544747	0	382
PVP01_1305200	NA	NA	NA	NA	NA	NA	NA	NA	NA	NA	NA	NA	NA	NA	NA	NA	144	0.0560311	0	505	130	0.0505837	0	386
PVP01_1114800	NA	NA	NA	NA	NA	NA	NA	NA	NA	NA	NA	NA	NA	NA	NA	NA	143	0.055642	0	506	0	0	0	0
PVP01_1223200	NA	NA	NA	NA	NA	NA	NA	NA	NA	NA	NA	NA	NA	NA	NA	NA	142	0.0552529	0	507	144	0.0560311	0	379
PVP01_1256000	NA	NA	NA	NA	NA	NA	NA	NA	NA	NA	NA	NA	NA	NA	NA	NA	137	0.0533074	0	511	0	0	0	0
PVP01_1442300	NA	NA	NA	NA	NA	NA	NA	NA	NA	NA	NA	NA	NA	NA	NA	NA	133	0.051751	0	515	0	0	0	0
PVP01_0411200	NA	NA	NA	NA	NA	NA	NA	NA	NA	NA	NA	NA	NA	NA	NA	NA	132	0.0513619	0	516	0	0	0	0
PVP01_1331200	NA	NA	NA	NA	NA	NA	NA	NA	NA	NA	NA	NA	NA	NA	NA	NA	128	0.0498055	0	519	0	0	0	0
PVP01_1313200	NA	NA	NA	NA	NA	NA	NA	NA	NA	NA	NA	NA	NA	NA	NA	NA	114	0.044358	0	530	0	0	0	0
PVP01_1346400	NA	NA	NA	NA	NA	NA	NA	NA	NA	NA	NA	NA	NA	NA	NA	NA	111	0.0431907	0	532	0	0	0	0
PVP01_1429600	NA	NA	NA	NA	NA	NA	NA	NA	NA	NA	NA	NA	NA	NA	NA	NA	108	0.0420234	0	535	0	0	0	0
PVP01_0938700	NA	NA	NA	NA	NA	NA	NA	NA	NA	NA	NA	NA	NA	NA	NA	NA	105	0.040856	0	537	0	0	0	0
PVP01_1311200	NA	NA	NA	NA	NA	NA	NA	NA	NA	NA	NA	NA	NA	NA	NA	NA	105	0.040856	0	537	0	0	0	0
PVP01_1333200	NA	NA	NA	NA	NA	NA	NA	NA	NA	NA	NA	NA	NA	NA	NA	NA	103	0.0400778	0	539	0	0	0	0
PVP01_1438100	NA	NA	NA	NA	NA	NA	NA	NA	NA	NA	NA	NA	NA	NA	NA	NA	102	0.0396887	0	540	0	0	0	0
PVP01_0406200	NA	NA	NA	NA	NA	NA	NA	NA	NA	NA	NA	NA	NA	NA	NA	NA	100	0.0389105	0	542	100	0.0389105	0	408
PVP01_1443100	NA	NA	NA	NA	NA	NA	NA	NA	NA	NA	NA	NA	NA	NA	NA	NA	98	0.0381323	0	544	0	0	0	0
PVP01_0831100	NA	NA	NA	NA	NA	NA	NA	NA	NA	NA	NA	NA	NA	NA	NA	NA	97	0.0377432	0	545	0	0	0	0
PVP01_1331900	NA	NA	NA	NA	NA	NA	NA	NA	NA	NA	NA	NA	NA	NA	NA	NA	96	0.0373541	0	546	0	0	0	0
PVP01_0815200	NA	NA	NA	NA	NA	NA	NA	NA	NA	NA	NA	NA	NA	NA	NA	NA	92	0.0357977	0	550	0	0	0	0
PVP01_0832000	NA	NA	NA	NA	NA	NA	NA	NA	NA	NA	NA	NA	NA	NA	NA	NA	91	0.0354086	0	551	0	0	0	0
PVP01_0406300	NA	NA	NA	NA	NA	NA	NA	NA	NA	NA	NA	NA	NA	NA	NA	NA	87	0.0338521	0	555	70	0.0272374	0	431
PVP01_0808200	NA	NA	NA	NA	NA	NA	NA	NA	NA	NA	NA	NA	NA	NA	NA	NA	85	0.0330739	0	557	0	0	0	0
PVP01_1251100	NA	NA	NA	NA	NA	NA	NA	NA	NA	NA	NA	NA	NA	NA	NA	NA	85	0.0330739	0	557	0	0	0	0
PVP01_1309100	NA	NA	NA	NA	NA	NA	NA	NA	NA	NA	NA	NA	NA	NA	NA	NA	85	0.0330739	0	557	81	0.0315175	0	420
PVP01_0414900	NA	NA	NA	NA	NA	NA	NA	NA	NA	NA	NA	NA	NA	NA	NA	NA	79	0.0307393	0	563	0	0	0	0
PVP01_1008900	NA	NA	NA	NA	NA	NA	NA	NA	NA	NA	NA	NA	NA	NA	NA	NA	79	0.0307393	0	563	78	0.0303502	0	423
PVP01_1239700	NA	NA	NA	NA	NA	NA	NA	NA	NA	NA	NA	NA	NA	NA	NA	NA	78	0.0303502	0	564	60	0.0233463	0	437
PVP01_1300600	NA	NA	NA	NA	NA	NA	NA	NA	NA	NA	NA	NA	NA	NA	NA	NA	78	0.0303502	0	564	80	0.0311284	0	421
PVP01_1439200	NA	NA	NA	NA	NA	NA	NA	NA	NA	NA	NA	NA	NA	NA	NA	NA	78	0.0303502	0	564	75	0.0291829	0	426
PVP01_1023000	NA	NA	NA	NA	NA	NA	NA	NA	NA	NA	NA	NA	NA	NA	NA	NA	75	0.0291829	0	565	0	0	0	0
PVP01_0318600	NA	NA	NA	NA	NA	NA	NA	NA	NA	NA	NA	NA	NA	NA	NA	NA	73	0.0284047	0	567	67	0.02607	0	432
PVP01_1145800	NA	NA	NA	NA	NA	NA	NA	NA	NA	NA	NA	NA	NA	NA	NA	NA	73	0.0284047	0	567	0	0	0	0
PVP01_0103300	NA	NA	NA	NA	NA	NA	NA	NA	NA	NA	NA	NA	NA	NA	NA	NA	72	0.0280156	0	568	42	0.0163424	0	446
PVP01_0110300	NA	NA	NA	NA	NA	NA	NA	NA	NA	NA	NA	NA	NA	NA	NA	NA	70	0.0272374	0	569	66	0.0256809	0	433
PVP01_1238100	NA	NA	NA	NA	NA	NA	NA	NA	NA	NA	NA	NA	NA	NA	NA	NA	70	0.0272374	0	569	0	0	0	0
PVP01_1260200	NA	NA	NA	NA	NA	NA	NA	NA	NA	NA	NA	NA	NA	NA	NA	NA	68	0.0264591	0	571	72	0.0280156	0	429
PVP01_0935300	NA	NA	NA	NA	NA	NA	NA	NA	NA	NA	NA	NA	NA	NA	NA	NA	65	0.0252918	0	573	58	0.0225681	0	438
PVP01_1009500	NA	NA	NA	NA	NA	NA	NA	NA	NA	NA	NA	NA	NA	NA	NA	NA	65	0.0252918	0	573	0	0	0	0
PVP01_1251700	NA	NA	NA	NA	NA	NA	NA	NA	NA	NA	NA	NA	NA	NA	NA	NA	65	0.0252918	0	573	0	0	0	0
PVP01_0422600	NA	NA	NA	NA	NA	NA	NA	NA	NA	NA	NA	NA	NA	NA	NA	NA	64	0.0249027	0	574	42	0.0163424	0	446
PVP01_0721100	NA	NA	NA	NA	NA	NA	NA	NA	NA	NA	NA	NA	NA	NA	NA	NA	64	0.0249027	0	574	0	0	0	0
PVP01_1139900	NA	NA	NA	NA	NA	NA	NA	NA	NA	NA	NA	NA	NA	NA	NA	NA	52	0.0202335	0	582	53	0.0206226	0	440
PVP01_0206200	NA	NA	NA	NA	NA	NA	NA	NA	NA	NA	NA	NA	NA	NA	NA	NA	50	0.0194553	0	584	0	0	0	0
PVP01_0511300	NA	NA	NA	NA	NA	NA	NA	NA	NA	NA	NA	NA	NA	NA	NA	NA	49	0.0190662	0	585	38	0.014786	0	449
PVP01_0808500	NA	NA	NA	NA	NA	NA	NA	NA	NA	NA	NA	NA	NA	NA	NA	NA	49	0.0190662	0	585	0	0	0	0
PVP01_0510900	NA	NA	NA	NA	NA	NA	NA	NA	NA	NA	NA	NA	NA	NA	NA	NA	48	0.018677	0	586	0	0	0	0
PVP01_0944700	NA	NA	NA	NA	NA	NA	NA	NA	NA	NA	NA	NA	NA	NA	NA	NA	47	0.0182879	0	587	0	0	0	0
PVP01_0307400	NA	NA	NA	NA	NA	NA	NA	NA	NA	NA	NA	NA	NA	NA	NA	NA	43	0.0167315	0	589	0	0	0	0
PVP01_1302800	NA	NA	NA	NA	NA	NA	NA	NA	NA	NA	NA	NA	NA	NA	NA	NA	43	0.0167315	0	589	43	0.0167315	0	445
PVP01_1420400	NA	NA	NA	NA	NA	NA	NA	NA	NA	NA	NA	NA	NA	NA	NA	NA	42	0.0163424	0	590	0	0	0	0
PVP01_0609000	NA	NA	NA	NA	NA	NA	NA	NA	NA	NA	NA	NA	NA	NA	NA	NA	41	0.0159533	0	591	41	0.0159533	0	447
PVP01_0909900	NA	NA	NA	NA	NA	NA	NA	NA	NA	NA	NA	NA	NA	NA	NA	NA	39	0.0151751	0	593	0	0	0	0
PVP01_1224000	NA	NA	NA	NA	NA	NA	NA	NA	NA	NA	NA	NA	NA	NA	NA	NA	39	0.0151751	0	593	0	0	0	0
PVP01_1264300	NA	NA	NA	NA	NA	NA	NA	NA	NA	NA	NA	NA	NA	NA	NA	NA	39	0.0151751	0	593	21	0.00817121	0	460
PVP01_1307500	NA	NA	NA	NA	NA	NA	NA	NA	NA	NA	NA	NA	NA	NA	NA	NA	39	0.0151751	0	593	0	0	0	0
PVP01_1006500	NA	NA	NA	NA	NA	NA	NA	NA	NA	NA	NA	NA	NA	NA	NA	NA	38	0.014786	0	594	0	0	0	0
PVP01_0616200	NA	NA	NA	NA	NA	NA	NA	NA	NA	NA	NA	NA	NA	NA	NA	NA	36	0.0140078	0	596	32	0.0124514	0	453
PVP01_1244400	NA	NA	NA	NA	NA	NA	NA	NA	NA	NA	NA	NA	NA	NA	NA	NA	28	0.0108949	0	600	28	0.0108949	0	455
PVP01_1334600	NA	NA	NA	NA	NA	NA	NA	NA	NA	NA	NA	NA	NA	NA	NA	NA	28	0.0108949	0	600	29	0.0112841	0	454
PVP01_1426400	NA	NA	NA	NA	NA	NA	NA	NA	NA	NA	NA	NA	NA	NA	NA	NA	28	0.0108949	0	600	24	0.00933852	0	457
PVP01_0522400	NA	NA	NA	NA	NA	NA	NA	NA	NA	NA	NA	NA	NA	NA	NA	NA	25	0.00972763	0	601	0	0	0	0
PVP01_0714300	NA	NA	NA	NA	NA	NA	NA	NA	NA	NA	NA	NA	NA	NA	NA	NA	25	0.00972763	0	601	19	0.007393	0	461
PVP01_0805900	NA	NA	NA	NA	NA	NA	NA	NA	NA	NA	NA	NA	NA	NA	NA	NA	23	0.00894942	0	602	23	0.00894942	0	458
PVP01_1223400	NA	NA	NA	NA	NA	NA	NA	NA	NA	NA	NA	NA	NA	NA	NA	NA	23	0.00894942	0	602	18	0.00700389	0	462
PVP01_1005700	NA	NA	NA	NA	NA	NA	NA	NA	NA	NA	NA	NA	NA	NA	NA	NA	22	0.00856031	0	603	0	0	0	0
PVP01_1334200	NA	NA	NA	NA	NA	NA	NA	NA	NA	NA	NA	NA	NA	NA	NA	NA	18	0.00700389	0	604	18	0.00700389	0	462
PVP01_1033200	NA	NA	NA	NA	NA	NA	NA	NA	NA	NA	NA	NA	NA	NA	NA	NA	8	0.00311284	0	607	7	0.00272374	0	464
PVP01_0712600	NA	NA	NA	NA	NA	NA	NA	NA	NA	NA	NA	NA	NA	NA	NA	NA	0	0	0	0	166	0.0645914	0	366
PVP01_0604300	NA	NA	NA	NA	NA	NA	NA	NA	NA	NA	NA	NA	NA	NA	NA	NA	0	0	0	0	57	0.022179	0	439
PVP01_1306900	NA	NA	NA	NA	NA	NA	NA	NA	NA	NA	NA	NA	NA	NA	NA	NA	0	0	0	0	43	0.0167315	0	445
PVP01_1311500	NA	NA	NA	NA	NA	NA	NA	NA	NA	NA	NA	NA	NA	NA	NA	NA	0	0	0	0	10	0.00389105	0	463
