# Supplementary material for: Single-cell RNA sequencing of Plasmodium vivax sporozoites reveals stage- and species-specific transcriptomic signatures
Source: PLoS Negl Trop Dis. 2022 Aug 4;16(8):e0010633. doi: 10.1371/journal.pntd.0010633 (PMC9380936; doi:10.1371/journal.pntd.0010633)
Supplement: S4 Table — (XLSX) [file pntd.0010633.s004.xlsx]

## Sheet: Sheet1
Supplementary Table S4. Overlap across datasets of additional genes detected in P.vivax sporozoites with UTR information and total counts in each replicate.
gene	Counts Rep1	Counts Rep2	Counts Rep3	detected
PVP01_0835600	49917	23299	35655	all
PVP01_1258000	27030	24765	18088	all
PVP01_1212300	12755	12745	9852	all
PVP01_0710400	12668	6055	7203	all
PVP01_0938800	10023	5808	7418	all
PVP01_1460700	9234	6930	5417	all
PVP01_1413500	7300	10003	5292	all
PVP01_1022600	7179	5722	5702	all
PVP01_0515400	7000	3821	4048	all
PVP01_0602100	6443	2422	2754	all
PVP01_1315100	5984	5311	4602	all
PVP01_0835700	5916	6228	5043	all
PVP01_1131600	5620	4941	4417	all
PVP01_0917500	5553	6172	3709	all
PVP01_1132600	5544	2392	2580	all
PVP01_1225100	5291	3725	3315	all
PVP01_0611700	5289	8809	8999	all
PVP01_1456100	5002	6169	4271	all
PVP01_0412300	4863	6141	4010	all
PVP01_0923400	4643	3622	2600	all
PVP01_0811600	4571	3939	3243	all
PVP01_0927900	4422	4785	3398	all
PVP01_1011900	4380	5301	2229	all
PVP01_1242200	4334	2944	2202	all
PVP01_1011800	4267	4752	2392	all
PVP01_0317600	4150	5070	3282	all
PVP01_0912600	4106	3386	1640	all
PVP01_1461700	4059	3663	2472	all
PVP01_0505600	4034	3804	3119	all
PVP01_1111200	3746	3714	3275	all
PVP01_1249700	3737	4327	3366	all
PVP01_0602700	3733	3791	1741	all
PVP01_0934200	3682	2484	2864	all
PVP01_1014200	3640	3605	2325	all
PVP01_0319000	3571	3270	3529	all
PVP01_0532200	3516	2458	2016	all
PVP01_1453200	3469	5157	3404	all
PVP01_1343900	3431	2733	1571	all
PVP01_0613700	3423	4875	2215	all
PVP01_0303900	3418	1840	1615	all
PVP01_1120200	3401	3695	2963	all
PVP01_1427300	3384	2429	1841	all
PVP01_0712500	3350	2868	1959	all
PVP01_0611800	3279	2334	2027	all
PVP01_1422800	3167	3511	2349	all
PVP01_1213900	3163	2183	2248	all
PVP01_1131800	3137	4208	2657	all
PVP01_0730900	3113	3962	3213	all
PVP01_1411700	3090	3282	2515	all
PVP01_1432200	3052	3848	3409	all
PVP01_1344100	2983	2220	2132	all
PVP01_1210400	2962	1933	1797	all
PVP01_0807700	2947	2231	1577	all
PVP01_0516700	2923	2401	1604	all
PVP01_0934800	2881	2244	1394	all
PVP01_1405700	2802	2054	1302	all
PVP01_0117400	2777	2533	2258	all
PVP01_1014700	2773	3827	2490	all
PVP01_1308600	2742	2098	1573	all
PVP01_0914900	2710	3331	2320	all
PVP01_1242100	2699	2116	1710	all
PVP01_1405400	2687	2442	1830	all
PVP01_0614100	2660	2391	1611	all
PVP01_0526500	2655	2600	1807	all
PVP01_1144400	2606	2028	1557	all
PVP01_1306500	2551	1327	998	all
PVP01_1110200	2450	2521	1723	all
PVP01_1463200	2432	2136	2548	all
PVP01_1203000	2423	2485	1542	all
PVP01_0927000	2420	1329	964	all
PVP01_1461800	2380	2383	1283	all
PVP01_0723900	2368	1759	1368	all
PVP01_0517100	2367	2856	1805	all
PVP01_1008000	2305	1458	1028	all
PVP01_0106700	2303	1542	1162	all
PVP01_1413800	2287	1500	961	all
PVP01_0527700	2206	1328	941	all
PVP01_0303700	2179	1692	1558	all
PVP01_1310600	2131	1631	1218	all
PVP01_0726800	2125	1115	1052	all
PVP01_0210700	2118	3318	3424	all
PVP01_0305100	2090	1455	1522	all
PVP01_0313300	2083	1786	1585	all
PVP01_1314200	2083	1790	1425	all
PVP01_0921600	2057	2321	1614	all
PVP01_0911200	2044	1397	1108	all
PVP01_1238800	2037	1213	1118	all
PVP01_0933800	2011	1533	1158	all
PVP01_0112200	1965	1735	1753	all
PVP01_0715100	1948	925	1275	all
PVP01_0802200	1945	1999	1177	all
PVP01_0305400	1932	2084	1348	all
PVP01_1333500	1898	1452	938	all
PVP01_0806900	1894	1684	1626	all
PVP01_0723600	1889	1577	1117	all
PVP01_0113600	1876	1471	1109	all
PVP01_1003900	1864	1787	1106	all
PVP01_0825600	1861	1555	1040	all
PVP01_1228600	1852	1604	1126	all
PVP01_1235600	1845	948	723	all
PVP01_1232200	1808	1614	946	all
PVP01_0210600	1803	1066	893	all
PVP01_1423600	1795	1202	1332	all
PVP01_1319400	1784	1622	1428	all
PVP01_0528300	1767	1402	906	all
PVP01_1435400	1767	2287	1704	all
PVP01_1218700	1732	1286	1319	all
PVP01_1436800	1723	1798	1086	all
PVP01_0912800	1713	2151	1430	all
PVP01_1117400	1713	1714	1210	all
PVP01_1311000	1700	1162	761	all
PVP01_0618400	1665	1668	1045	all
PVP01_0807300	1664	2228	1179	all
PVP01_0108700	1654	764	1262	all
PVP01_1026100	1629	1753	1006	all
PVP01_1439100	1625	1216	1061	all
PVP01_1010500	1603	2016	1150	all
PVP01_0607800	1599	1194	1071	all
PVP01_1124900	1597	1296	820	all
PVP01_1032700	1595	1595	1495	all
PVP01_1403100	1586	783	798	all
PVP01_0216000	1569	1146	785	all
PVP01_0418100	1569	2127	1617	all
PVP01_0516800	1556	1621	889	all
PVP01_0526600	1555	1750	1252	all
PVP01_0517200	1537	1224	1024	all
PVP01_1425800	1526	1313	1028	all
PVP01_1440500	1526	1407	854	all
PVP01_1316800	1522	1580	945	all
PVP01_1136000	1515	2246	1340	all
PVP01_1404300	1510	1098	765	all
PVP01_1245500	1494	1729	1002	all
PVP01_1427800	1470	1546	856	all
PVP01_0615300	1463	2873	1490	all
PVP01_0925500	1460	994	923	all
PVP01_1315300	1454	1836	994	all
PVP01_1030500	1451	1212	1084	all
PVP01_0418900	1442	1635	1264	all
PVP01_1305400	1436	933	753	all
PVP01_0729600	1431	1518	1261	all
PVP01_1105900	1429	1171	1032	all
PVP01_1119800	1420	816	468	all
PVP01_1429700	1417	672	810	all
PVP01_0607900	1413	1797	949	all
PVP01_1247100	1402	1045	982	all
PVP01_1002700	1393	608	650	all
PVP01_1251200	1393	1231	911	all
PVP01_1252500	1379	1760	1028	all
PVP01_1262200	1367	1357	1059	all
PVP01_0530300	1358	1145	1213	all
PVP01_0717400	1347	1480	768	all
PVP01_0714500	1335	1434	875	all
PVP01_0210400	1311	708	561	all
PVP01_0813100	1309	1108	876	all
PVP01_1436200	1305	971	914	all
PVP01_0718000	1304	1514	1066	all
PVP01_1325400	1301	599	568	all
PVP01_1334800	1297	1480	1076	all
PVP01_1110800	1291	1002	731	all
PVP01_1260400	1289	1662	1348	all
PVP01_0825500	1285	1188	1231	all
PVP01_0302700	1273	899	525	all
PVP01_0939800	1252	756	690	all
PVP01_0916500	1250	1129	777	all
PVP01_0816500	1249	722	567	all
PVP01_0803200	1242	735	615	all
PVP01_0529800	1241	864	573	all
PVP01_1257900	1234	830	787	all
PVP01_0214400	1216	939	721	all
PVP01_1227000	1214	1404	910	all
PVP01_0715000	1210	796	700	all
PVP01_0717300	1210	672	647	all
PVP01_1453000	1210	1614	980	all
PVP01_1233600	1207	1011	803	all
PVP01_1217900	1204	1126	864	all
PVP01_0619000	1203	1023	788	all
PVP01_1240500	1203	1046	812	all
PVP01_1212200	1202	857	744	all
PVP01_0908100	1200	1240	1140	all
PVP01_0110600	1196	778	731	all
PVP01_1238400	1195	738	429	all
PVP01_1461400	1192	632	520	all
PVP01_0408100	1189	757	621	all
PVP01_0319900	1171	950	683	all
PVP01_1230400	1170	907	503	all
PVP01_1425500	1166	1314	918	all
PVP01_1025900	1163	846	725	all
PVP01_1334400	1159	541	516	all
PVP01_1115100	1151	884	562	all
PVP01_1121300	1150	761	548	all
PVP01_0710900	1148	699	613	all
PVP01_1121400	1148	823	723	all
PVP01_1425700	1147	1539	1183	all
PVP01_1260100	1143	913	916	all
PVP01_0317800	1142	755	585	all
PVP01_1244500	1142	685	609	all
PVP01_1412600	1142	657	540	all
PVP01_1268100	1137	1217	902	all
PVP01_1464000	1125	914	725	all
PVP01_1211700	1123	1317	948	all
PVP01_1126400	1120	555	359	all
PVP01_1236500	1119	715	559	all
PVP01_0112100	1110	944	984	all
PVP01_1347000	1107	1301	788	all
PVP01_0407400	1102	791	644	all
PVP01_1425900	1100	1100	727	all
PVP01_1301900	1098	675	586	all
PVP01_1325300	1097	866	614	all
PVP01_0527800	1093	758	542	all
PVP01_0609300	1092	889	888	all
PVP01_1256300	1092	338	289	all
PVP01_0906600	1087	731	355	all
PVP01_1207300	1085	810	835	all
PVP01_1342900	1081	1147	791	all
PVP01_0712200	1080	1304	1795	all
PVP01_0508100	1076	824	644	all
PVP01_0114800	1070	924	767	all
PVP01_0947200	1061	857	689	all
PVP01_1427900	1060	790	1112	all
PVP01_0920300	1055	930	622	all
PVP01_0927100	1054	1461	704	all
PVP01_1112500	1054	1308	737	all
PVP01_1132700	1052	801	830	all
PVP01_0612400	1051	770	523	all
PVP01_1326500	1048	877	712	all
PVP01_0308000	1045	659	1135	all
PVP01_1311600	1045	1207	675	all
PVP01_1415300	1033	1240	806	all
PVP01_1212700	1030	1198	903	all
PVP01_1438000	1027	816	561	all
PVP01_0926700	1025	1047	874	all
PVP01_1338000	1023	552	423	all
PVP01_0307800	1019	889	582	all
PVP01_0614800	1018	700	641	all
PVP01_1124800	1015	711	556	all
PVP01_0920800	1010	813	703	all
PVP01_1206600	1010	959	642	all
PVP01_0943000	1008	699	577	all
PVP01_1437200	1001	768	614	all
PVP01_1224800	986	834	800	all
PVP01_0115600	985	714	571	all
PVP01_1456200	981	960	718	all
PVP01_1426100	978	641	604	all
PVP01_0206700	972	527	530	all
PVP01_0705100	968	689	554	all
PVP01_1405800	966	708	487	all
PVP01_0303800	965	741	744	all
PVP01_0837700	963	609	621	all
PVP01_0526700	960	577	329	all
PVP01_1227100	960	611	574	all
PVP01_1331300	960	810	614	all
PVP01_0806500	958	632	533	all
PVP01_0921000	948	928	520	all
PVP01_1226000	948	848	600	all
PVP01_1440200	937	847	596	all
PVP01_0621300	935	758	571	all
PVP01_1143800	935	771	638	all
PVP01_1431800	935	1002	558	all
PVP01_1261600	933	889	577	all
PVP01_0721200	925	760	498	all
PVP01_1457000	924	1237	938	all
PVP01_1441600	922	437	336	all
PVP01_1271000	918	606	443	all
PVP01_1218600	916	852	782	all
PVP01_1332400	914	865	968	all
PVP01_1445900	914	717	598	all
PVP01_0939500	909	537	380	all
PVP01_0907900	903	880	494	all
PVP01_0720700	895	781	506	all
PVP01_1456000	894	525	308	all
PVP01_0414200	891	553	599	all
PVP01_0407500	889	999	660	all
PVP01_1308000	887	509	379	all
PVP01_1129300	886	987	847	all
PVP01_1142400	886	546	360	all
PVP01_0504400	876	731	538	all
PVP01_1325800	876	984	608	all
PVP01_1022500	874	679	505	all
PVP01_1341400	873	570	380	all
PVP01_1437800	869	688	425	all
PVP01_0521400	868	616	839	all
PVP01_1221600	868	770	567	all
PVP01_0418000	867	617	810	all
PVP01_0923600	857	532	539	all
PVP01_1437000	857	707	516	all
PVP01_0303300	855	673	604	all
PVP01_1455000	852	727	437	all
PVP01_0609100	851	460	332	all
PVP01_0526400	848	762	652	all
PVP01_0316000	842	888	662	all
PVP01_0823000	836	597	620	all
PVP01_1435200	836	762	421	all
PVP01_0703500	829	640	441	all
PVP01_1450600	823	495	335	all
PVP01_1122200	821	474	446	all
PVP01_1267500	817	605	457	all
PVP01_1226900	809	592	596	all
PVP01_0718200	802	631	337	all
PVP01_0520500	801	960	580	all
PVP01_0903900	800	462	579	all
PVP01_0917900	799	785	542	all
PVP01_1027500	793	353	332	all
PVP01_0215200	789	359	375	all
PVP01_1307900	787	687	576	all
PVP01_0733200	784	733	401	all
PVP01_0415700	780	399	345	all
PVP01_1208500	779	364	440	all
PVP01_0905700	775	533	484	all
PVP01_1261400	773	506	371	all
PVP01_1215200	758	507	541	all
PVP01_1232800	758	834	360	all
PVP01_0105700	752	367	245	all
PVP01_1103500	752	688	527	all
PVP01_1255300	744	365	345	all
PVP01_1420300	743	437	416	all
PVP01_1246800	741	770	431	all
PVP01_0917300	737	1021	926	all
PVP01_0804200	735	522	383	all
PVP01_0716500	732	726	492	all
PVP01_1427200	731	403	303	all
PVP01_1465600	731	706	610	all
PVP01_1315200	730	539	376	all
PVP01_0810100	728	588	464	all
PVP01_1218400	724	417	167	all
PVP01_1341200	724	669	431	all
PVP01_0212900	723	832	549	all
PVP01_1454700	721	1106	770	all
PVP01_1447500	719	250	476	all
PVP01_0509500	718	394	286	all
PVP01_1330100	718	1552	1046	all
PVP01_1342500	718	401	261	all
PVP01_0521100	717	407	414	all
PVP01_1013800	717	517	580	all
PVP01_0204500	713	527	481	all
PVP01_1317300	711	361	276	all
PVP01_0720500	709	473	351	all
PVP01_1431700	700	634	439	all
PVP01_1202900	699	572	399	all
PVP01_1105100	698	413	392	all
PVP01_1253300	696	842	509	all
PVP01_1449800	694	531	325	all
PVP01_0814600	688	375	287	all
PVP01_1462800	688	624	426	all
PVP01_1122700	687	372	399	all
PVP01_0421300	683	782	401	all
PVP01_1331700	683	390	317	all
PVP01_1014900	682	465	332	all
PVP01_1105500	681	817	414	all
PVP01_1416800	680	618	576	all
PVP01_0529400	678	389	297	all
PVP01_1125500	678	562	399	all
PVP01_1419200	678	386	425	all
PVP01_0908800	673	498	397	all
PVP01_0945600	672	581	503	all
PVP01_1459000	672	530	314	all
PVP01_0307900	668	399	451	all
PVP01_0418200	668	549	359	all
PVP01_1110300	666	357	325	all
PVP01_1225700	666	356	305	all
PVP01_1260300	661	405	304	all
PVP01_1262700	661	671	445	all
PVP01_0315200	660	477	286	all
PVP01_0713000	657	804	467	all
PVP01_1203900	656	597	462	all
PVP01_0421000	653	487	468	all
PVP01_0836900	652	450	359	all
PVP01_1263200	652	443	239	all
PVP01_0708700	649	486	267	all
PVP01_1269300	647	461	367	all
PVP01_0618800	643	429	320	all
PVP01_0713400	640	243	432	all
PVP01_0819100	637	360	339	all
PVP01_1468200	636	550	452	all
PVP01_1211900	632	464	346	all
PVP01_1306200	628	500	294	all
PVP01_0118300	624	334	322	all
PVP01_0813900	623	633	680	all
PVP01_1308200	623	438	352	all
PVP01_0315800	622	375	291	all
PVP01_0947700	622	371	242	all
PVP01_1124500	622	637	579	all
PVP01_1228500	617	482	549	all
PVP01_1305500	617	428	395	all
PVP01_0713300	613	383	413	all
PVP01_0532300	610	500	413	all
PVP01_0701700	605	517	381	all
PVP01_1265200	604	474	370	all
PVP01_0316100	603	453	341	all
PVP01_0409400	596	447	347	all
PVP01_1460600	596	1039	637	all
PVP01_0618200	595	415	389	all
PVP01_1023500	595	359	355	all
PVP01_1430400	595	331	289	all
PVP01_0937400	594	450	346	all
PVP01_1004000	594	632	427	all
PVP01_1134900	593	270	289	all
PVP01_1265400	592	674	480	all
PVP01_0920900	591	522	392	all
PVP01_0922200	591	327	450	all
PVP01_1215100	591	340	311	all
PVP01_1238700	588	425	297	all
PVP01_0714700	582	374	314	all
PVP01_1335200	581	291	254	all
PVP01_1212800	578	678	622	all
PVP01_1305800	578	418	282	all
PVP01_0811900	577	492	405	all
PVP01_1139800	575	543	369	all
PVP01_0713200	574	323	288	all
PVP01_1014800	574	406	432	all
PVP01_1202400	574	686	237	all
PVP01_0933200	573	356	243	all
PVP01_0316300	571	330	102	all
PVP01_1103600	571	451	369	all
PVP01_0317700	569	470	349	all
PVP01_0405600	566	641	570	all
PVP01_0118400	565	390	281	all
PVP01_0921700	563	506	413	all
PVP01_1103100	563	169	233	all
PVP01_1404900	559	525	356	all
PVP01_0207300	558	325	233	all
PVP01_1208400	558	227	314	all
PVP01_1026000	555	481	553	all
PVP01_1435700	555	473	355	all
PVP01_0615400	552	420	250	all
PVP01_0305200	551	826	670	all
PVP01_0531800	549	536	184	all
PVP01_1330800	546	195	165	all
PVP01_0705900	545	448	364	all
PVP01_1116800	545	333	239	all
PVP01_1120300	544	436	278	all
PVP01_0609400	542	332	426	all
PVP01_1309300	542	560	480	all
PVP01_0514700	541	351	249	all
PVP01_1330900	540	349	238	all
PVP01_0203400	534	140	171	all
PVP01_1236600	533	273	292	all
PVP01_1423500	533	560	369	all
PVP01_1206200	532	328	312	all
PVP01_1429400	530	332	379	all
PVP01_1435100	529	676	406	all
PVP01_0616800	528	361	317	all
PVP01_0506100	527	367	253	all
PVP01_1456400	524	300	301	all
PVP01_1418300	523	528	359	all
PVP01_0617600	519	483	385	all
PVP01_0816100	517	557	523	all
PVP01_1022700	515	248	221	all
PVP01_0942500	511	269	1208	all
PVP01_1218000	511	584	282	all
PVP01_1454200	511	522	405	all
PVP01_0309100	508	637	376	all
PVP01_1304300	504	485	339	all
PVP01_0509300	503	268	264	all
PVP01_0933600	500	1119	758	all
PVP01_1123100	498	774	458	all
PVP01_1321600	498	529	527	all
PVP01_0928600	495	419	286	all
PVP01_1304900	495	289	275	all
PVP01_1021700	494	307	265	all
PVP01_0607700	493	529	490	all
PVP01_1129800	493	169	131	all
PVP01_0920700	488	471	392	all
PVP01_0810500	486	653	573	all
PVP01_1249000	485	225	123	all
PVP01_1404200	485	749	362	all
PVP01_1023900	483	332	264	all
PVP01_0115300	481	348	362	all
PVP01_1105700	481	291	154	all
PVP01_1319300	479	334	367	all
PVP01_1247500	477	373	264	all
PVP01_0928500	476	359	251	all
PVP01_1303000	476	291	221	all
PVP01_0104400	473	241	320	all
PVP01_1129100	472	387	232	all
PVP01_1300800	466	590	401	all
PVP01_1449600	466	399	379	all
PVP01_1442400	461	348	346	all
PVP01_1435500	458	312	206	all
PVP01_0818400	457	321	210	all
PVP01_1440300	456	333	326	all
PVP01_1468900	454	374	250	all
PVP01_1221500	453	227	189	all
PVP01_0717500	451	384	283	all
PVP01_1461000	449	195	42	all
PVP01_1213700	448	738	440	all
PVP01_1130500	447	314	260	all
PVP01_1214000	446	364	220	all
PVP01_0313000	445	319	266	all
PVP01_0928700	443	231	176	all
PVP01_0512900	442	445	273	all
PVP01_1269400	442	223	119	all
PVP01_0508000	438	306	260	all
PVP01_0945500	437	652	411	all
PVP01_0729800	436	289	255	all
PVP01_1218500	436	769	462	all
PVP01_1464600	434	504	283	all
PVP01_0204300	433	248	288	all
PVP01_1240700	432	379	220	all
PVP01_0520900	431	323	494	all
PVP01_0727500	430	321	435	all
PVP01_0833000	426	347	230	all
PVP01_1232600	426	478	303	all
PVP01_1331500	421	295	219	all
PVP01_0212200	419	230	194	all
PVP01_0701400	417	393	331	all
PVP01_1409300	417	292	533	all
PVP01_1002900	415	232	177	all
PVP01_1024000	414	149	231	all
PVP01_1422700	412	271	248	all
PVP01_0408300	411	611	226	all
PVP01_0414000	411	151	213	all
PVP01_0418300	411	490	339	all
PVP01_1326900	411	522	213	all
PVP01_0704200	410	262	219	all
PVP01_0410300	409	374	274	all
PVP01_0811800	407	343	230	all
PVP01_0109900	406	281	180	all
PVP01_0733400	405	208	259	all
PVP01_0809500	405	193	332	all
PVP01_0817600	404	281	234	all
PVP01_1232900	403	266	267	all
PVP01_1464100	403	369	308	all
PVP01_0701900	401	263	202	all
PVP01_1265500	400	419	224	all
PVP01_0932800	399	417	316	all
PVP01_1116200	399	243	156	all
PVP01_0603900	398	433	256	all
PVP01_1412500	394	280	329	all
PVP01_0937800	392	278	265	all
PVP01_1340900	391	408	324	all
PVP01_1012600	390	175	677	all
PVP01_1261500	389	379	201	all
PVP01_1137400	388	333	283	all
PVP01_1405200	384	208	229	all
PVP01_0620000	383	279	176	all
PVP01_0726600	383	242	328	all
PVP01_1441300	382	1275	392	all
PVP01_0920600	381	254	250	all
PVP01_1425600	380	478	282	all
PVP01_0529100	376	366	207	all
PVP01_0109700	375	387	199	all
PVP01_0613600	374	300	224	all
PVP01_0823200	371	354	191	all
PVP01_0927800	371	395	217	all
PVP01_1227700	370	435	323	all
PVP01_0511800	369	499	369	all
PVP01_0810200	368	535	291	all
PVP01_1146700	368	365	229	all
PVP01_1238900	368	216	227	all
PVP01_0915000	367	205	133	all
PVP01_1011000	367	234	181	all
PVP01_0316800	364	155	96	all
PVP01_1269800	364	166	144	all
PVP01_1245400	362	757	664	all
PVP01_1344700	362	508	384	all
PVP01_0105600	358	366	180	all
PVP01_0616700	356	148	123	all
PVP01_0911100	354	359	272	all
PVP01_1248300	354	366	332	all
PVP01_1465800	354	282	146	all
PVP01_0108100	353	348	207	all
PVP01_1021400	352	188	235	all
PVP01_1119100	351	238	166	all
PVP01_0512300	350	236	296	all
PVP01_0921100	349	435	125	all
PVP01_1334500	348	165	135	all
PVP01_0710500	346	210	242	all
PVP01_0728700	346	280	165	all
PVP01_0733300	346	406	317	all
PVP01_0814700	346	256	207	all
PVP01_0730200	345	158	222	all
PVP01_0926900	344	332	223	all
PVP01_0111100	343	193	218	all
PVP01_0819700	343	174	335	all
PVP01_0421200	338	255	226	all
PVP01_0813300	338	252	297	all
PVP01_1030300	338	257	269	all
PVP01_0516600	337	198	166	all
PVP01_1440800	336	156	129	all
PVP01_0521200	333	238	192	all
PVP01_0835800	332	402	160	all
PVP01_1118100	332	249	197	all
PVP01_0701600	327	299	242	all
PVP01_0619900	326	409	235	all
PVP01_1312500	326	229	235	all
PVP01_0943600	325	401	387	all
PVP01_1119900	325	233	213	all
PVP01_0828900	324	214	144	all
PVP01_1124400	324	317	232	all
PVP01_0734300	322	200	228	all
PVP01_1118400	322	131	244	all
PVP01_1111300	321	349	250	all
PVP01_1260800	321	245	170	all
PVP01_0720600	316	285	190	all
PVP01_1331100	316	514	294	all
PVP01_1417400	314	212	154	all
PVP01_0117200	312	305	210	all
PVP01_1011500	312	124	69	all
PVP01_0513100	311	518	279	all
PVP01_0204700	310	335	314	all
PVP01_0924900	308	264	283	all
PVP01_1224200	308	282	221	all
PVP01_1415900	307	454	481	all
PVP01_0905000	304	211	128	all
PVP01_1427000	304	193	167	all
PVP01_1304100	303	160	158	all
PVP01_1303200	302	528	295	all
PVP01_1441500	301	279	170	all
PVP01_0730800	299	212	164	all
PVP01_0421700	298	126	280	all
PVP01_0723500	298	476	257	all
PVP01_0409600	297	259	136	all
PVP01_1343500	297	409	260	all
PVP01_0505700	295	231	160	all
PVP01_1106200	295	204	234	all
PVP01_1315600	295	261	135	all
PVP01_1437100	294	230	156	all
PVP01_0913900	292	280	191	all
PVP01_0214300	288	200	170	all
PVP01_0602400	288	302	119	all
PVP01_0607000	287	254	236	all
PVP01_1217800	287	203	193	all
PVP01_0807800	286	194	120	all
PVP01_1415400	284	236	157	all
PVP01_0932700	283	288	218	all
PVP01_0945000	283	322	234	all
PVP01_1418400	282	423	231	all
PVP01_0802600	281	163	150	all
PVP01_1312000	277	349	439	all
PVP01_1009700	272	424	303	all
PVP01_1211500	271	221	148	all
PVP01_0416300	269	191	186	all
PVP01_1011700	269	329	267	all
PVP01_0614500	268	281	219	all
PVP01_0719400	268	270	461	all
PVP01_1270500	268	261	184	all
PVP01_1211400	267	312	157	all
PVP01_1264600	267	72	46	all
PVP01_1141800	266	363	220	all
PVP01_1223600	265	190	241	all
PVP01_1302200	264	113	88	all
PVP01_0319800	263	250	138	all
PVP01_0940300	262	163	223	all
PVP01_1417200	262	257	222	all
PVP01_0813500	261	129	199	all
PVP01_1202300	260	271	144	all
PVP01_1463400	259	112	109	all
PVP01_0706500	258	145	114	all
PVP01_1324800	257	279	187	all
PVP01_0106600	253	305	184	all
PVP01_0216200	253	183	140	all
PVP01_1135200	252	178	140	all
PVP01_1456300	250	253	146	all
PVP01_0915400	246	182	244	all
PVP01_1269500	244	182	110	all
PVP01_0420400	243	686	126	all
PVP01_1407600	243	164	169	all
PVP01_0722800	241	219	174	all
PVP01_0929800	240	344	260	all
PVP01_0923300	236	283	217	all
PVP01_1015300	235	179	208	all
PVP01_1232300	235	301	155	all
PVP01_1232500	235	228	124	all
PVP01_0724700	234	147	270	all
PVP01_0932000	234	181	221	all
PVP01_0948200	232	130	183	all
PVP01_1439300	230	146	126	all
PVP01_1103800	229	191	119	all
PVP01_0109300	227	842	225	all
PVP01_0531000	225	170	125	all
PVP01_1321900	223	86	126	all
PVP01_1329700	222	182	151	all
PVP01_0103500	220	270	235	all
PVP01_0724400	219	330	158	all
PVP01_1137600	219	169	143	all
PVP01_1253100	218	188	119	all
PVP01_1121800	217	177	82	all
PVP01_1132900	216	106	118	all
PVP01_1417300	213	236	165	all
PVP01_1249300	211	146	141	all
PVP01_1420000	209	296	189	all
PVP01_1306600	206	127	90	all
PVP01_0317000	205	716	215	all
PVP01_1248400	204	113	78	all
PVP01_0930500	203	180	207	all
PVP01_1440900	203	271	259	all
PVP01_0937900	202	128	175	all
PVP01_1312600	199	135	134	all
PVP01_1343800	199	220	174	all
PVP01_0714400	195	242	116	all
PVP01_1117100	192	88	176	all
PVP01_0810400	191	465	244	all
PVP01_1316100	191	131	175	all
PVP01_0109000	186	271	157	all
PVP01_MIT02700	185	132	249	all
PVP01_1339600	182	168	108	all
PVP01_0104300	180	130	96	all
PVP01_1459600	175	82	122	all
PVP01_0719100	173	180	171	all
PVP01_0304200	172	86	233	all
PVP01_1423100	171	367	375	all
PVP01_1422100	167	95	85	all
PVP01_1306100	165	69	69	all
PVP01_0918800	164	97	191	all
PVP01_1417000	163	117	129	all
PVP01_0729400	161	59	101	all
PVP01_1108200	160	70	88	all
PVP01_0905800	151	145	138	all
PVP01_1317200	151	42	89	all
PVP01_0948400	146	85	163	all
PVP01_1430000	145	132	126	all
PVP01_1437700	144	185	118	all
PVP01_1121700	142	193	124	all
PVP01_0712900	140	121	83	all
PVP01_1004500	131	89	75	all
PVP01_1429300	120	105	84	all
PVP01_0517400	112	181	189	all
PVP01_1263900	112	42	41	all
PVP01_1257800	109	131	220	all
PVP01_1335700	107	121	86	all
PVP01_1344600	103	170	170	all
PVP01_1461500	103	37	36	all
PVP01_1403600	98	31	29	all
PVP01_1301400	97	76	62	all
PVP01_0526100	93	78	51	all
PVP01_0923700	85	114	68	all
PVP01_1124700	80	26	92	all
PVP01_1404700	80	59	56	all
PVP01_1270300	78	49	98	all
PVP01_1431600	75	71	51	all
PVP01_1012300	65	71	159	all
PVP01_1210500	64	53	49	all
PVP01_1142900	58	59	63	all
PVP01_1307300	52	21	52	all
PVP01_0616100	27	52	84	all
PVP01_0705500	603	NA	NA	Pv1
PVP01_1224900	545	NA	NA	Pv1
PVP01_1234500	425	NA	NA	Pv1
PVP01_0724100	417	NA	NA	Pv1
PVP01_0718500	409	NA	NA	Pv1
PVP01_0207800	406	NA	NA	Pv1
PVP01_0318400	383	NA	NA	Pv1
PVP01_1456600	343	NA	NA	Pv1
PVP01_1466700	340	NA	NA	Pv1
PVP01_0832700	325	NA	NA	Pv1
PVP01_1214500	319	NA	NA	Pv1
PVP01_0505300	315	NA	NA	Pv1
PVP01_1305000	314	NA	NA	Pv1
PVP01_0205400	307	NA	NA	Pv1
PVP01_1333800	307	NA	NA	Pv1
PVP01_1027200	304	NA	NA	Pv1
PVP01_1120400	291	NA	NA	Pv1
PVP01_1010000	277	NA	NA	Pv1
PVP01_1428900	277	NA	NA	Pv1
PVP01_0924100	270	NA	NA	Pv1
PVP01_1028700	266	NA	NA	Pv1
PVP01_1343000	265	NA	NA	Pv1
PVP01_1310000	264	NA	NA	Pv1
PVP01_1435000	264	NA	NA	Pv1
PVP01_0812900	263	NA	NA	Pv1
PVP01_0410900	260	NA	NA	Pv1
PVP01_1449200	253	NA	NA	Pv1
PVP01_0707900	250	NA	NA	Pv1
PVP01_1265100	248	NA	NA	Pv1
PVP01_0308400	247	NA	NA	Pv1
PVP01_1110900	247	NA	NA	Pv1
PVP01_1319200	246	NA	NA	Pv1
PVP01_0821600	243	NA	NA	Pv1
PVP01_0528200	241	NA	NA	Pv1
PVP01_0826200	237	NA	NA	Pv1
PVP01_1031400	233	NA	NA	Pv1
PVP01_0830000	231	NA	NA	Pv1
PVP01_0834700	229	NA	NA	Pv1
PVP01_0618500	224	NA	NA	Pv1
PVP01_1232100	224	NA	NA	Pv1
PVP01_1117200	221	NA	NA	Pv1
PVP01_1453500	221	NA	NA	Pv1
PVP01_0729000	218	NA	NA	Pv1
PVP01_1131000	218	NA	NA	Pv1
PVP01_0723700	217	NA	NA	Pv1
PVP01_1258100	213	NA	NA	Pv1
PVP01_1248600	210	NA	NA	Pv1
PVP01_1016000	209	NA	NA	Pv1
PVP01_1030600	206	NA	NA	Pv1
PVP01_0515500	200	NA	NA	Pv1
PVP01_1412400	198	NA	NA	Pv1
PVP01_0508800	192	NA	NA	Pv1
PVP01_0702100	191	NA	NA	Pv1
PVP01_0308500	190	NA	NA	Pv1
PVP01_1226200	188	NA	NA	Pv1
PVP01_1256900	188	NA	NA	Pv1
PVP01_1002400	187	NA	NA	Pv1
PVP01_0944900	186	NA	NA	Pv1
PVP01_1233000	186	NA	NA	Pv1
PVP01_0511000	182	NA	NA	Pv1
PVP01_1455600	179	NA	NA	Pv1
PVP01_1205300	175	NA	NA	Pv1
PVP01_1220700	175	NA	NA	Pv1
PVP01_1333900	170	NA	NA	Pv1
PVP01_0946000	166	NA	NA	Pv1
PVP01_1030700	165	NA	NA	Pv1
PVP01_1146300	163	NA	NA	Pv1
PVP01_0928900	162	NA	NA	Pv1
PVP01_1334300	161	NA	NA	Pv1
PVP01_1410700	161	NA	NA	Pv1
PVP01_1025600	160	NA	NA	Pv1
PVP01_1146200	160	NA	NA	Pv1
PVP01_1011100	159	NA	NA	Pv1
PVP01_1239900	159	NA	NA	Pv1
PVP01_0304400	158	NA	NA	Pv1
PVP01_0320000	158	NA	NA	Pv1
PVP01_1312300	158	NA	NA	Pv1
PVP01_1233500	157	NA	NA	Pv1
PVP01_0315900	151	NA	NA	Pv1
PVP01_1242500	151	NA	NA	Pv1
PVP01_0210500	150	NA	NA	Pv1
PVP01_0521300	150	NA	NA	Pv1
PVP01_0945300	150	NA	NA	Pv1
PVP01_1122400	150	NA	NA	Pv1
PVP01_1230300	149	NA	NA	Pv1
PVP01_0820600	146	NA	NA	Pv1
PVP01_0512400	144	NA	NA	Pv1
PVP01_1403500	143	NA	NA	Pv1
PVP01_0527200	142	NA	NA	Pv1
PVP01_1339500	141	NA	NA	Pv1
PVP01_1019400	140	NA	NA	Pv1
PVP01_1314000	140	NA	NA	Pv1
PVP01_1256600	138	NA	NA	Pv1
PVP01_0419200	132	NA	NA	Pv1
PVP01_1137800	132	NA	NA	Pv1
PVP01_1011600	131	NA	NA	Pv1
PVP01_0714800	129	NA	NA	Pv1
PVP01_0946800	128	NA	NA	Pv1
PVP01_1341100	127	NA	NA	Pv1
PVP01_0602000	125	NA	NA	Pv1
PVP01_0204600	122	NA	NA	Pv1
PVP01_0708800	122	NA	NA	Pv1
PVP01_0105500	121	NA	NA	Pv1
PVP01_1111000	121	NA	NA	Pv1
PVP01_1458000	121	NA	NA	Pv1
PVP01_0906400	120	NA	NA	Pv1
PVP01_1106100	120	NA	NA	Pv1
PVP01_1140500	119	NA	NA	Pv1
PVP01_1234900	118	NA	NA	Pv1
PVP01_1403000	118	NA	NA	Pv1
PVP01_1419300	115	NA	NA	Pv1
PVP01_0709100	112	NA	NA	Pv1
PVP01_1226400	112	NA	NA	Pv1
PVP01_1245300	111	NA	NA	Pv1
PVP01_0710000	109	NA	NA	Pv1
PVP01_1130400	109	NA	NA	Pv1
PVP01_0928800	107	NA	NA	Pv1
PVP01_0820200	106	NA	NA	Pv1
PVP01_0412600	105	NA	NA	Pv1
PVP01_0713100	105	NA	NA	Pv1
PVP01_0413200	104	NA	NA	Pv1
PVP01_1202800	104	NA	NA	Pv1
PVP01_0818600	103	NA	NA	Pv1
PVP01_1021100	101	NA	NA	Pv1
PVP01_0116000	99	NA	NA	Pv1
PVP01_1267000	97	NA	NA	Pv1
PVP01_1468100	96	NA	NA	Pv1
PVP01_0409100	95	NA	NA	Pv1
PVP01_0519000	95	NA	NA	Pv1
PVP01_0407300	93	NA	NA	Pv1
PVP01_0514800	93	NA	NA	Pv1
PVP01_1303400	92	NA	NA	Pv1
PVP01_1344300	91	NA	NA	Pv1
PVP01_0929600	87	NA	NA	Pv1
PVP01_1242600	87	NA	NA	Pv1
PVP01_1455200	84	NA	NA	Pv1
PVP01_0618700	82	NA	NA	Pv1
PVP01_0303100	81	NA	NA	Pv1
PVP01_1107200	80	NA	NA	Pv1
PVP01_1456500	79	NA	NA	Pv1
PVP01_0420500	78	NA	NA	Pv1
PVP01_1257400	78	NA	NA	Pv1
PVP01_1343200	78	NA	NA	Pv1
PVP01_1431900	78	NA	NA	Pv1
PVP01_0612900	77	NA	NA	Pv1
PVP01_0915900	77	NA	NA	Pv1
PVP01_0829200	76	NA	NA	Pv1
PVP01_1234700	76	NA	NA	Pv1
PVP01_1409400	76	NA	NA	Pv1
PVP01_1410300	76	NA	NA	Pv1
PVP01_1207900	75	NA	NA	Pv1
PVP01_1418200	75	NA	NA	Pv1
PVP01_0722500	69	NA	NA	Pv1
PVP01_0912900	69	NA	NA	Pv1
PVP01_0923500	69	NA	NA	Pv1
PVP01_1408900	68	NA	NA	Pv1
PVP01_0106800	66	NA	NA	Pv1
PVP01_0210900	65	NA	NA	Pv1
PVP01_1223100	64	NA	NA	Pv1
PVP01_1462100	63	NA	NA	Pv1
PVP01_1125900	62	NA	NA	Pv1
PVP01_1236900	61	NA	0	Pv1
PVP01_1340400	61	NA	NA	Pv1
PVP01_0113300	60	NA	NA	Pv1
PVP01_1218300	59	NA	NA	Pv1
PVP01_0928300	58	NA	NA	Pv1
PVP01_0413400	55	NA	NA	Pv1
PVP01_1018300	55	NA	NA	Pv1
PVP01_1452100	55	NA	NA	Pv1
PVP01_0305500	52	NA	NA	Pv1
PVP01_0705700	51	NA	NA	Pv1
PVP01_1112000	46	NA	NA	Pv1
PVP01_1268600	46	NA	NA	Pv1
PVP01_0945900	43	NA	NA	Pv1
PVP01_0905500	41	NA	NA	Pv1
PVP01_1030200	41	NA	NA	Pv1
PVP01_0520400	40	NA	NA	Pv1
PVP01_1237300	40	NA	NA	Pv1
PVP01_0622400	38	NA	NA	Pv1
PVP01_1338300	38	NA	NA	Pv1
PVP01_0406500	35	NA	NA	Pv1
PVP01_1410400	35	NA	NA	Pv1
PVP01_0601600	34	NA	NA	Pv1
PVP01_0104700	33	NA	NA	Pv1
PVP01_0817200	33	NA	NA	Pv1
PVP01_1316700	32	NA	NA	Pv1
PVP01_1248900	31	NA	NA	Pv1
PVP01_1301700	31	NA	NA	Pv1
PVP01_1140800	29	NA	NA	Pv1
PVP01_0108600	27	NA	NA	Pv1
PVP01_1203700	27	NA	NA	Pv1
PVP01_1469500	24	NA	NA	Pv1
PVP01_1208800	22	NA	NA	Pv1
PVP01_0000030	21	NA	NA	Pv1
PVP01_1401300	21	NA	NA	Pv1
PVP01_1247900	20	NA	NA	Pv1
PVP01_1340300	13	NA	NA	Pv1
PVP01_0834900	969	267	NA	Pv1&Pv2
PVP01_0602200	579	520	NA	Pv1&Pv2
PVP01_0947600	567	269	NA	Pv1&Pv2
PVP01_1005500	563	398	NA	Pv1&Pv2
PVP01_0522500	557	360	NA	Pv1&Pv2
PVP01_1437400	551	411	NA	Pv1&Pv2
PVP01_0728800	533	263	NA	Pv1&Pv2
PVP01_1017600	520	497	NA	Pv1&Pv2
PVP01_0927300	490	433	NA	Pv1&Pv2
PVP01_0806600	486	378	NA	Pv1&Pv2
PVP01_0707800	474	461	0	Pv1&Pv2
PVP01_1463500	465	652	NA	Pv1&Pv2
PVP01_0513200	462	329	NA	Pv1&Pv2
PVP01_1327800	456	391	0	Pv1&Pv2
PVP01_1461200	455	191	NA	Pv1&Pv2
PVP01_0823100	453	372	NA	Pv1&Pv2
PVP01_0509700	435	212	NA	Pv1&Pv2
PVP01_0926100	431	588	NA	Pv1&Pv2
PVP01_0107900	426	289	NA	Pv1&Pv2
PVP01_0823500	420	412	NA	Pv1&Pv2
PVP01_1029900	418	311	NA	Pv1&Pv2
PVP01_1468000	416	312	NA	Pv1&Pv2
PVP01_1264900	412	329	NA	Pv1&Pv2
PVP01_0814000	399	289	NA	Pv1&Pv2
PVP01_0418700	385	325	NA	Pv1&Pv2
PVP01_0908600	383	337	NA	Pv1&Pv2
PVP01_1028200	373	268	NA	Pv1&Pv2
PVP01_1341500	373	367	NA	Pv1&Pv2
PVP01_1259900	372	260	NA	Pv1&Pv2
PVP01_1418500	370	206	NA	Pv1&Pv2
PVP01_1138300	368	221	NA	Pv1&Pv2
PVP01_1422500	365	441	NA	Pv1&Pv2
PVP01_1240400	362	204	NA	Pv1&Pv2
PVP01_1466400	360	183	NA	Pv1&Pv2
PVP01_1145300	357	284	NA	Pv1&Pv2
PVP01_1020600	351	268	NA	Pv1&Pv2
PVP01_1344000	340	294	NA	Pv1&Pv2
PVP01_1341300	338	252	NA	Pv1&Pv2
PVP01_1454400	338	232	NA	Pv1&Pv2
PVP01_1464200	338	237	NA	Pv1&Pv2
PVP01_1213400	333	450	NA	Pv1&Pv2
PVP01_1020400	331	206	NA	Pv1&Pv2
PVP01_1265000	330	201	NA	Pv1&Pv2
PVP01_1467800	319	166	NA	Pv1&Pv2
PVP01_0103800	311	281	NA	Pv1&Pv2
PVP01_0819300	309	250	NA	Pv1&Pv2
PVP01_0416700	308	176	NA	Pv1&Pv2
PVP01_1466900	297	138	NA	Pv1&Pv2
PVP01_0602900	292	157	NA	Pv1&Pv2
PVP01_0603800	292	267	NA	Pv1&Pv2
PVP01_0617700	291	324	NA	Pv1&Pv2
PVP01_0116200	290	159	NA	Pv1&Pv2
PVP01_1233700	289	244	NA	Pv1&Pv2
PVP01_0938100	283	168	NA	Pv1&Pv2
PVP01_1106300	279	247	NA	Pv1&Pv2
PVP01_1251500	274	190	NA	Pv1&Pv2
PVP01_0311800	272	223	NA	Pv1&Pv2
PVP01_0931900	270	148	NA	Pv1&Pv2
PVP01_1430900	270	140	NA	Pv1&Pv2
PVP01_0708100	268	116	NA	Pv1&Pv2
PVP01_0504900	265	86	NA	Pv1&Pv2
PVP01_1458900	260	186	NA	Pv1&Pv2
PVP01_1203300	240	123	NA	Pv1&Pv2
PVP01_1311100	240	206	NA	Pv1&Pv2
PVP01_0822900	232	135	NA	Pv1&Pv2
PVP01_1221400	231	219	NA	Pv1&Pv2
PVP01_0303200	227	197	NA	Pv1&Pv2
PVP01_0532100	220	99	NA	Pv1&Pv2
PVP01_1305300	218	102	NA	Pv1&Pv2
PVP01_1338600	218	181	NA	Pv1&Pv2
PVP01_1415800	218	195	NA	Pv1&Pv2
PVP01_1453400	218	91	NA	Pv1&Pv2
PVP01_0422000	217	156	NA	Pv1&Pv2
PVP01_0415000	213	172	NA	Pv1&Pv2
PVP01_1126600	211	157	NA	Pv1&Pv2
PVP01_1245200	211	166	NA	Pv1&Pv2
PVP01_1405900	210	130	NA	Pv1&Pv2
PVP01_0416400	209	99	NA	Pv1&Pv2
PVP01_0913700	207	161	NA	Pv1&Pv2
PVP01_1006300	207	132	NA	Pv1&Pv2
PVP01_1225900	205	278	NA	Pv1&Pv2
PVP01_1130100	202	127	NA	Pv1&Pv2
PVP01_1005600	198	119	NA	Pv1&Pv2
PVP01_1450900	187	176	NA	Pv1&Pv2
PVP01_0924200	183	86	NA	Pv1&Pv2
PVP01_0508900	179	140	NA	Pv1&Pv2
PVP01_0933900	173	83	NA	Pv1&Pv2
PVP01_1305900	172	201	NA	Pv1&Pv2
PVP01_1432400	172	308	NA	Pv1&Pv2
PVP01_1435800	166	185	NA	Pv1&Pv2
PVP01_0917800	164	105	NA	Pv1&Pv2
PVP01_1451500	159	190	NA	Pv1&Pv2
PVP01_0110400	152	85	NA	Pv1&Pv2
PVP01_1468700	152	95	NA	Pv1&Pv2
PVP01_0611200	150	68	NA	Pv1&Pv2
PVP01_1145900	143	110	NA	Pv1&Pv2
PVP01_0406800	141	82	NA	Pv1&Pv2
PVP01_0508200	141	129	NA	Pv1&Pv2
PVP01_1339000	141	96	NA	Pv1&Pv2
PVP01_1112700	138	162	NA	Pv1&Pv2
PVP01_1320900	132	48	NA	Pv1&Pv2
PVP01_0837900	131	117	NA	Pv1&Pv2
PVP01_1003300	129	61	NA	Pv1&Pv2
PVP01_1429000	128	72	NA	Pv1&Pv2
PVP01_1014400	127	56	NA	Pv1&Pv2
PVP01_1334900	123	121	NA	Pv1&Pv2
PVP01_1457900	123	64	NA	Pv1&Pv2
PVP01_1246500	121	141	NA	Pv1&Pv2
PVP01_0717800	116	153	NA	Pv1&Pv2
PVP01_1441200	113	123	NA	Pv1&Pv2
PVP01_0947900	108	66	NA	Pv1&Pv2
PVP01_1426000	106	67	NA	Pv1&Pv2
PVP01_1239200	102	102	NA	Pv1&Pv2
PVP01_1121200	97	83	NA	Pv1&Pv2
PVP01_0710300	94	47	NA	Pv1&Pv2
PVP01_0726300	94	98	NA	Pv1&Pv2
PVP01_1109600	90	78	NA	Pv1&Pv2
PVP01_0302600	86	49	NA	Pv1&Pv2
PVP01_1131900	76	198	NA	Pv1&Pv2
PVP01_1326400	73	95	NA	Pv1&Pv2
PVP01_0607600	69	42	NA	Pv1&Pv2
PVP01_1413700	61	37	NA	Pv1&Pv2
PVP01_1112400	59	102	NA	Pv1&Pv2
PVP01_0927700	54	51	NA	Pv1&Pv2
PVP01_0940900	30	11	NA	Pv1&Pv2
PVP01_0205700	662	NA	303	Pv1&Pv3
PVP01_1416300	563	NA	249	Pv1&Pv3
PVP01_1022000	467	NA	298	Pv1&Pv3
PVP01_1454900	452	NA	166	Pv1&Pv3
PVP01_0717100	414	NA	214	Pv1&Pv3
PVP01_0717900	414	NA	302	Pv1&Pv3
PVP01_1467700	403	NA	244	Pv1&Pv3
PVP01_1022200	396	NA	246	Pv1&Pv3
PVP01_1325700	396	0	210	Pv1&Pv3
PVP01_0706300	394	NA	668	Pv1&Pv3
PVP01_0109500	368	NA	270	Pv1&Pv3
PVP01_1421400	368	NA	290	Pv1&Pv3
PVP01_1139500	349	NA	211	Pv1&Pv3
PVP01_0726650	346	NA	216	Pv1&Pv3
PVP01_1025000	339	NA	255	Pv1&Pv3
PVP01_0825900	332	NA	252	Pv1&Pv3
PVP01_1008600	332	NA	75	Pv1&Pv3
PVP01_1024700	330	NA	272	Pv1&Pv3
PVP01_1002800	328	NA	140	Pv1&Pv3
PVP01_0415100	311	NA	226	Pv1&Pv3
PVP01_0948300	283	NA	144	Pv1&Pv3
PVP01_1211800	282	NA	181	Pv1&Pv3
PVP01_0010840	274	NA	146	Pv1&Pv3
PVP01_0804000	266	NA	173	Pv1&Pv3
PVP01_0942400	265	NA	722	Pv1&Pv3
PVP01_0617300	257	NA	138	Pv1&Pv3
PVP01_1306400	255	NA	245	Pv1&Pv3
PVP01_1458600	255	NA	170	Pv1&Pv3
PVP01_0410000	251	NA	225	Pv1&Pv3
PVP01_0521000	247	NA	188	Pv1&Pv3
PVP01_1028500	247	NA	156	Pv1&Pv3
PVP01_1017300	244	NA	190	Pv1&Pv3
PVP01_1231100	241	NA	209	Pv1&Pv3
PVP01_1457100	240	NA	143	Pv1&Pv3
PVP01_1329100	224	NA	96	Pv1&Pv3
PVP01_1205900	210	NA	126	Pv1&Pv3
PVP01_1455500	210	NA	112	Pv1&Pv3
PVP01_1133000	206	NA	153	Pv1&Pv3
PVP01_1423300	204	NA	55	Pv1&Pv3
PVP01_1232700	199	NA	187	Pv1&Pv3
PVP01_0212300	198	NA	80	Pv1&Pv3
PVP01_1247400	198	NA	104	Pv1&Pv3
PVP01_1135400	197	NA	88	Pv1&Pv3
PVP01_1346200	195	NA	111	Pv1&Pv3
PVP01_0531400	192	NA	155	Pv1&Pv3
PVP01_0722100	178	NA	74	Pv1&Pv3
PVP01_1141400	176	NA	174	Pv1&Pv3
PVP01_1216200	168	NA	183	Pv1&Pv3
PVP01_1339100	164	NA	160	Pv1&Pv3
PVP01_0941400	163	NA	79	Pv1&Pv3
PVP01_0836100	157	NA	70	Pv1&Pv3
PVP01_1405300	155	NA	167	Pv1&Pv3
PVP01_0507400	152	NA	66	Pv1&Pv3
PVP01_0526800	152	NA	75	Pv1&Pv3
PVP01_1321200	151	NA	140	Pv1&Pv3
PVP01_1121600	149	NA	94	Pv1&Pv3
PVP01_1346800	149	NA	93	Pv1&Pv3
PVP01_0818500	143	NA	78	Pv1&Pv3
PVP01_0618300	141	NA	58	Pv1&Pv3
PVP01_1117300	128	NA	98	Pv1&Pv3
PVP01_1210700	128	NA	79	Pv1&Pv3
PVP01_1407700	112	NA	50	Pv1&Pv3
PVP01_0103400	109	NA	118	Pv1&Pv3
PVP01_1338100	104	NA	95	Pv1&Pv3
PVP01_1220800	101	NA	49	Pv1&Pv3
PVP01_1259200	96	NA	172	Pv1&Pv3
PVP01_0935100	91	NA	50	Pv1&Pv3
PVP01_0936900	88	NA	63	Pv1&Pv3
PVP01_MIT03300	86	NA	123	Pv1&Pv3
PVP01_0214200	84	NA	83	Pv1&Pv3
PVP01_1123000	83	NA	40	Pv1&Pv3
PVP01_1237000	75	NA	59	Pv1&Pv3
PVP01_0918900	72	NA	69	Pv1&Pv3
PVP01_1333600	69	NA	53	Pv1&Pv3
PVP01_0808300	58	NA	70	Pv1&Pv3
PVP01_0209600	56	NA	73	Pv1&Pv3
PVP01_1032600	54	NA	31	Pv1&Pv3
PVP01_1436900	54	NA	78	Pv1&Pv3
PVP01_1015600	47	NA	101	Pv1&Pv3
PVP01_0531500	36	NA	99	Pv1&Pv3
PVP01_1244000	34	NA	51	Pv1&Pv3
PVP01_1339400	34	NA	48	Pv1&Pv3
PVP01_1218900	21	NA	14	Pv1&Pv3
PVP01_0608100	0	190	NA	Pv2
PVP01_1450700	NA	497	NA	Pv2
PVP01_1258800	NA	393	NA	Pv2
PVP01_1450800	NA	391	NA	Pv2
PVP01_1261100	NA	389	NA	Pv2
PVP01_1010400	NA	384	NA	Pv2
PVP01_1324200	NA	355	NA	Pv2
PVP01_0320200	NA	353	NA	Pv2
PVP01_1329600	NA	347	NA	Pv2
PVP01_1242000	NA	298	NA	Pv2
PVP01_0312900	NA	291	NA	Pv2
PVP01_1451900	NA	286	NA	Pv2
PVP01_1453300	NA	275	NA	Pv2
PVP01_1144700	NA	265	NA	Pv2
PVP01_0706000	NA	260	NA	Pv2
PVP01_0317900	NA	241	NA	Pv2
PVP01_0807400	NA	233	NA	Pv2
PVP01_1412800	NA	230	NA	Pv2
PVP01_1234300	NA	227	NA	Pv2
PVP01_0832800	NA	218	NA	Pv2
PVP01_1105800	NA	209	NA	Pv2
PVP01_0307300	NA	200	NA	Pv2
PVP01_0405400	NA	200	NA	Pv2
PVP01_0118000	NA	197	NA	Pv2
PVP01_1131700	NA	197	NA	Pv2
PVP01_0725800	NA	194	NA	Pv2
PVP01_0117000	NA	187	NA	Pv2
PVP01_0916450	NA	187	NA	Pv2
PVP01_1458800	NA	187	NA	Pv2
PVP01_0922100	NA	173	NA	Pv2
PVP01_1320800	NA	172	NA	Pv2
PVP01_1343100	NA	172	NA	Pv2
PVP01_1226100	NA	171	NA	Pv2
PVP01_0314700	NA	170	NA	Pv2
PVP01_1465300	NA	168	NA	Pv2
PVP01_0933700	NA	158	NA	Pv2
PVP01_0529000	NA	146	NA	Pv2
PVP01_0302900	NA	142	NA	Pv2
PVP01_1458100	NA	139	NA	Pv2
PVP01_1119700	NA	138	NA	Pv2
PVP01_1331400	NA	138	NA	Pv2
PVP01_0835400	NA	137	NA	Pv2
PVP01_0310100	NA	134	NA	Pv2
PVP01_1132400	NA	126	NA	Pv2
PVP01_1418100	NA	124	NA	Pv2
PVP01_0320300	NA	123	NA	Pv2
PVP01_1118900	NA	119	NA	Pv2
PVP01_1230900	NA	117	NA	Pv2
PVP01_1212600	NA	115	NA	Pv2
PVP01_0119500	NA	112	NA	Pv2
PVP01_0622100	NA	112	NA	Pv2
PVP01_1421300	NA	109	NA	Pv2
PVP01_1005400	NA	108	NA	Pv2
PVP01_1007600	NA	108	NA	Pv2
PVP01_1136100	NA	108	NA	Pv2
PVP01_0420600	NA	106	NA	Pv2
PVP01_0919800	NA	106	NA	Pv2
PVP01_0511400	NA	104	NA	Pv2
PVP01_0614600	NA	101	NA	Pv2
PVP01_1233400	NA	100	NA	Pv2
PVP01_0817500	NA	99	NA	Pv2
PVP01_0507600	NA	98	NA	Pv2
PVP01_1132800	NA	94	NA	Pv2
PVP01_0114200	NA	93	NA	Pv2
PVP01_0914100	NA	92	NA	Pv2
PVP01_1345200	NA	89	NA	Pv2
PVP01_1119000	NA	86	NA	Pv2
PVP01_1325900	NA	80	NA	Pv2
PVP01_1249100	NA	78	NA	Pv2
PVP01_1264700	NA	76	NA	Pv2
PVP01_1221300	NA	74	NA	Pv2
PVP01_1340800	NA	74	NA	Pv2
PVP01_0603300	NA	73	NA	Pv2
PVP01_0109100	NA	72	NA	Pv2
PVP01_1442700	NA	72	NA	Pv2
PVP01_0104800	NA	68	NA	Pv2
PVP01_0520700	NA	65	NA	Pv2
PVP01_1023800	NA	65	NA	Pv2
PVP01_0208000	NA	63	NA	Pv2
PVP01_0909500	NA	62	NA	Pv2
PVP01_1462900	NA	60	NA	Pv2
PVP01_1259100	NA	59	NA	Pv2
PVP01_1109300	NA	57	NA	Pv2
PVP01_1454000	NA	56	NA	Pv2
PVP01_0314900	NA	55	NA	Pv2
PVP01_1203800	NA	55	NA	Pv2
PVP01_1235700	NA	54	NA	Pv2
PVP01_1255700	NA	54	NA	Pv2
PVP01_1016600	NA	53	NA	Pv2
PVP01_0919100	NA	52	NA	Pv2
PVP01_0610200	NA	51	NA	Pv2
PVP01_0119200	NA	50	NA	Pv2
PVP01_0947800	NA	50	NA	Pv2
PVP01_0422100	NA	49	NA	Pv2
PVP01_0603200	NA	49	NA	Pv2
PVP01_1426900	NA	49	NA	Pv2
PVP01_0818300	NA	48	NA	Pv2
PVP01_1444000	NA	46	NA	Pv2
PVP01_1403400	NA	44	NA	Pv2
PVP01_1107700	NA	42	NA	Pv2
PVP01_0833700	NA	41	NA	Pv2
PVP01_1335600	NA	37	NA	Pv2
PVP01_0321100	NA	33	NA	Pv2
PVP01_1264400	NA	32	NA	Pv2
PVP01_0411300	NA	31	NA	Pv2
PVP01_0939700	NA	30	NA	Pv2
PVP01_1460800	NA	27	NA	Pv2
PVP01_0413500	NA	25	NA	Pv2
PVP01_0106200	NA	21	NA	Pv2
PVP01_0616600	NA	20	NA	Pv2
PVP01_0410200	NA	15	NA	Pv2
PVP01_0815800	NA	14	NA	Pv2
PVP01_0525900	NA	12	NA	Pv2
PVP01_0119400	NA	11	NA	Pv2
PVP01_1301600	NA	11	NA	Pv2
PVP01_1449400	NA	8	NA	Pv2
PVP01_0914000	NA	789	373	Pv2&Pv3
PVP01_1205800	NA	491	211	Pv2&Pv3
PVP01_0806800	NA	473	214	Pv2&Pv3
PVP01_0613800	NA	464	490	Pv2&Pv3
PVP01_1463300	NA	399	284	Pv2&Pv3
PVP01_1205100	NA	396	274	Pv2&Pv3
PVP01_1420800	NA	307	240	Pv2&Pv3
PVP01_1303100	NA	305	191	Pv2&Pv3
PVP01_0917400	NA	299	240	Pv2&Pv3
PVP01_API02800	NA	283	219	Pv2&Pv3
PVP01_1238600	NA	271	145	Pv2&Pv3
PVP01_1133700	NA	244	324	Pv2&Pv3
PVP01_0925200	NA	236	192	Pv2&Pv3
PVP01_0726100	NA	223	204	Pv2&Pv3
PVP01_1202500	NA	223	143	Pv2&Pv3
PVP01_1424300	NA	216	81	Pv2&Pv3
PVP01_1258700	NA	192	65	Pv2&Pv3
PVP01_1259800	NA	180	153	Pv2&Pv3
PVP01_0803100	NA	175	137	Pv2&Pv3
PVP01_1309400	NA	169	106	Pv2&Pv3
PVP01_0926200	NA	168	93	Pv2&Pv3
PVP01_0607500	NA	161	267	Pv2&Pv3
PVP01_0913600	NA	149	141	Pv2&Pv3
PVP01_1464500	NA	148	82	Pv2&Pv3
PVP01_0420800	NA	141	168	Pv2&Pv3
PVP01_0615200	NA	132	79	Pv2&Pv3
PVP01_1316500	NA	125	134	Pv2&Pv3
PVP01_0837800	NA	124	149	Pv2&Pv3
PVP01_0532000	NA	123	85	Pv2&Pv3
PVP01_1419600	NA	121	131	Pv2&Pv3
PVP01_0118100	NA	116	82	Pv2&Pv3
PVP01_0603700	NA	115	121	Pv2&Pv3
PVP01_0944100	NA	115	105	Pv2&Pv3
PVP01_0709200	NA	103	55	Pv2&Pv3
PVP01_1246200	NA	103	147	Pv2&Pv3
PVP01_1208600	NA	99	78	Pv2&Pv3
PVP01_1442500	NA	99	83	Pv2&Pv3
PVP01_1257500	NA	97	153	Pv2&Pv3
PVP01_1265900	NA	89	37	Pv2&Pv3
PVP01_0615900	NA	86	43	Pv2&Pv3
PVP01_0905900	NA	77	92	Pv2&Pv3
PVP01_0606100	NA	68	63	Pv2&Pv3
PVP01_0109400	NA	64	36	Pv2&Pv3
PVP01_0207400	NA	56	35	Pv2&Pv3
PVP01_0809900	NA	44	28	Pv2&Pv3
PVP01_1239100	NA	41	53	Pv2&Pv3
PVP01_0304700	NA	33	23	Pv2&Pv3
PVP01_1124600	NA	30	38	Pv2&Pv3
PVP01_1426300	NA	27	15	Pv2&Pv3
PVP01_0528600	0	NA	136	Pv3
PVP01_1124300	0	NA	85	Pv3
PVP01_1437300	NA	NA	238	Pv3
PVP01_1220300	NA	NA	213	Pv3
PVP01_1224700	NA	NA	210	Pv3
PVP01_1433500	NA	NA	207	Pv3
PVP01_1309500	NA	NA	205	Pv3
PVP01_1449300	NA	NA	199	Pv3
PVP01_0113700	NA	NA	189	Pv3
PVP01_0313100	NA	NA	180	Pv3
PVP01_0528700	NA	NA	179	Pv3
PVP01_0807100	NA	NA	177	Pv3
PVP01_0813400	NA	NA	157	Pv3
PVP01_1115600	NA	NA	153	Pv3
PVP01_0206100	NA	NA	147	Pv3
PVP01_1305200	NA	NA	144	Pv3
PVP01_1114800	NA	NA	143	Pv3
PVP01_1223200	NA	NA	142	Pv3
PVP01_1256000	NA	NA	137	Pv3
PVP01_1442300	NA	NA	133	Pv3
PVP01_0411200	NA	NA	132	Pv3
PVP01_1331200	NA	NA	128	Pv3
PVP01_1313200	NA	NA	114	Pv3
PVP01_1346400	NA	NA	111	Pv3
PVP01_1429600	NA	NA	108	Pv3
PVP01_0938700	NA	NA	105	Pv3
PVP01_1311200	NA	NA	105	Pv3
PVP01_1333200	NA	NA	103	Pv3
PVP01_1438100	NA	NA	102	Pv3
PVP01_0406200	NA	NA	100	Pv3
PVP01_1443100	NA	NA	98	Pv3
PVP01_0831100	NA	NA	97	Pv3
PVP01_1331900	NA	NA	96	Pv3
PVP01_0815200	NA	NA	92	Pv3
PVP01_0832000	NA	NA	91	Pv3
PVP01_0406300	NA	NA	87	Pv3
PVP01_0808200	NA	NA	85	Pv3
PVP01_1251100	NA	NA	85	Pv3
PVP01_1309100	NA	NA	85	Pv3
PVP01_0414900	NA	NA	79	Pv3
PVP01_1008900	NA	NA	79	Pv3
PVP01_1239700	NA	NA	78	Pv3
PVP01_1300600	NA	NA	78	Pv3
PVP01_1439200	NA	NA	78	Pv3
PVP01_1023000	NA	NA	75	Pv3
PVP01_0318600	NA	NA	73	Pv3
PVP01_1145800	NA	NA	73	Pv3
PVP01_0103300	NA	NA	72	Pv3
PVP01_0110300	NA	NA	70	Pv3
PVP01_1238100	NA	NA	70	Pv3
PVP01_1260200	NA	NA	68	Pv3
PVP01_0935300	NA	NA	65	Pv3
PVP01_1009500	NA	NA	65	Pv3
PVP01_1251700	NA	NA	65	Pv3
PVP01_0422600	NA	NA	64	Pv3
PVP01_0721100	NA	NA	64	Pv3
PVP01_1139900	NA	NA	52	Pv3
PVP01_0206200	NA	NA	50	Pv3
PVP01_0511300	NA	NA	49	Pv3
PVP01_0808500	NA	NA	49	Pv3
PVP01_0510900	NA	NA	48	Pv3
PVP01_0944700	NA	NA	47	Pv3
PVP01_0307400	NA	NA	43	Pv3
PVP01_1302800	NA	NA	43	Pv3
PVP01_1420400	NA	NA	42	Pv3
PVP01_0609000	NA	NA	41	Pv3
PVP01_0909900	NA	NA	39	Pv3
PVP01_1224000	NA	NA	39	Pv3
PVP01_1264300	NA	NA	39	Pv3
PVP01_1307500	NA	NA	39	Pv3
PVP01_1006500	NA	NA	38	Pv3
PVP01_0616200	NA	NA	36	Pv3
PVP01_1244400	NA	NA	28	Pv3
PVP01_1334600	NA	NA	28	Pv3
PVP01_1426400	NA	NA	28	Pv3
PVP01_0522400	NA	NA	25	Pv3
PVP01_0714300	NA	NA	25	Pv3
PVP01_0805900	NA	NA	23	Pv3
PVP01_1223400	NA	NA	23	Pv3
PVP01_1005700	NA	NA	22	Pv3
PVP01_1334200	NA	NA	18	Pv3
PVP01_1033200	NA	NA	8	Pv3
