# Supplementary material for: Single-cell RNA sequencing of Plasmodium vivax sporozoites reveals stage- and species-specific transcriptomic signatures
Source: PLoS Negl Trop Dis. 2022 Aug 4;16(8):e0010633. doi: 10.1371/journal.pntd.0010633 (PMC9380936; doi:10.1371/journal.pntd.0010633)
Supplement: S5 Table — (XLSX) [file pntd.0010633.s005.xlsx]

## Sheet: Sheet1
Supplementary Table S5. Comparison of PvSpz 10x rank to Vivax Sporozoite Consortium 2019 IJP bulk RNA seq rank
	PvSpz 10x Replicates				Vivax Sporozoite Consortium 2019 IJP bulk RNA analysis (note dense rank is relative to all genes detected in the original analysis - only 10x detected genes listed)
gene	ranking_pv1	ranking_pv2	ranking_pv3	total_sum_rank	VSC_decile	VSC_denseRank
PVP01_0835600	1	2	1	1	1	2
PVP01_1258000	2	1	2	2	1	6
PVP01_1212300	3	3	3	3	1	17
PVP01_0710400	4	11	6	4	1	8
PVP01_0938800	5	12	5	5	1	14
PVP01_1460700	6	6	8	8	1	19
PVP01_1413500	7	4	9	7	1	54
PVP01_1022600	8	13	7	9	1	23
PVP01_0515400	9	28	14	16	1	3
PVP01_0602100	10	56	31	23	1	1
PVP01_1315100	11	14	11	11	1	44
PVP01_0835700	12	7	10	10	3	1384
PVP01_1131600	13	18	12	15	1	241
PVP01_0917500	14	8	16	13	1	55
PVP01_1132600	15	58	34	29	1	276
PVP01_1225100	16	31	23	19	1	83
PVP01_0611700	17	5	4	6	1	278
PVP01_1456100	18	9	13	12	1	34
PVP01_0412300	19	10	15	14	1	42
PVP01_0923400	20	35	33	27	1	213
PVP01_0811600	21	25	26	22	1	31
PVP01_0927900	22	20	21	17	1	163
PVP01_1011900	23	15	45	21	1	115
PVP01_1242200	24	43	47	38	1	33
PVP01_1011800	25	21	39	25	7	3396
PVP01_0317600	26	17	24	18	1	187
PVP01_0912600	27	38	63	40	1	63
PVP01_1461700	28	34	38	34	1	179
PVP01_0505600	29	29	28	26	1	134
PVP01_1111200	30	32	25	28	1	129
PVP01_1249700	31	22	22	24	1	57
PVP01_0602700	32	30	59	39	1	37
PVP01_0934200	33	52	30	42	1	49
PVP01_1014200	34	36	41	37	1	29
PVP01_0319000	35	42	17	31	1	165
PVP01_0532200	36	53	50	48	1	96
PVP01_1453200	37	16	20	20	1	24
PVP01_1343900	38	47	73	49	1	85
PVP01_0613700	39	19	46	30	2	661
PVP01_0303900	40	81	66	60	NA	NA
PVP01_1120200	41	33	29	35	1	5
PVP01_1427300	42	55	52	50	1	168
PVP01_0712500	43	45	51	47	1	377
PVP01_0611800	44	61	49	51	1	372
PVP01_1422800	45	37	40	43	1	36
PVP01_1213900	46	69	44	52	1	195
PVP01_1131800	47	23	32	36	1	88
PVP01_0730900	48	24	27	33	1	61
PVP01_1411700	49	41	36	44	1	59
PVP01_1432200	50	26	19	32	1	60
PVP01_1344100	51	68	48	54	1	28
PVP01_1210400	52	80	56	63	1	152
PVP01_0807700	53	66	71	61	1	210
PVP01_0516700	54	57	69	59	1	56
PVP01_0934800	55	65	83	66	1	26
PVP01_1405700	56	76	89	70	1	87
PVP01_0117400	57	49	43	53	1	104
PVP01_1014700	58	27	37	41	1	41
PVP01_1308600	59	74	72	68	1	92
PVP01_0914900	60	39	42	46	1	76
PVP01_1242100	61	73	61	65	1	68
PVP01_1405400	62	54	53	58	1	16
PVP01_0614100	63	59	68	64	1	114
PVP01_0526500	64	48	54	56	1	27
PVP01_1144400	65	77	75	69	1	264
PVP01_1306500	66	131	132	90	1	20
PVP01_1110200	67	50	60	62	1	30
PVP01_1463200	68	71	35	55	1	71
PVP01_1203000	69	51	76	67	1	98
PVP01_0927000	70	129	138	96	2	668
PVP01_1461800	71	60	90	71	1	421
PVP01_0723900	72	89	84	75	1	84
PVP01_0517100	73	46	55	57	1	35
PVP01_1008000	74	120	128	92	1	334
PVP01_0106700	75	111	104	88	7	3495
PVP01_1413800	76	116	139	95	1	43
PVP01_0527700	77	130	144	105	2	929
PVP01_0303700	78	95	74	78	1	77
PVP01_1310600	79	100	97	89	1	183
PVP01_0726800	80	162	123	114	1	40
PVP01_0210700	81	40	18	45	1	145
PVP01_0305100	82	121	77	87	1	108
PVP01_0313300	83	87	70	76	1	32
PVP01_1314200	83	85	82	81	2	600
PVP01_0921600	84	62	67	72	1	188
PVP01_0911200	85	127	114	104	1	106
PVP01_1238800	86	147	110	109	1	411
PVP01_0933800	87	113	105	97	8	3509
PVP01_0112200	88	92	58	77	1	565
PVP01_0715100	89	190	91	122	1	531
PVP01_0802200	90	79	103	84	1	86
PVP01_0305400	91	75	85	79	1	64
PVP01_1333500	92	122	145	115	1	232
PVP01_0806900	93	96	64	83	1	94
PVP01_0723600	94	107	111	101	1	81
PVP01_0113600	95	118	113	106	1	45
PVP01_1003900	96	86	115	94	1	72
PVP01_0825600	97	108	126	106	1	247
PVP01_1228600	98	104	109	102	1	22
PVP01_1235600	99	184	194	150	1	243
PVP01_1232200	100	103	142	109	1	116
PVP01_0210600	101	167	156	137	1	62
PVP01_1423600	102	150	87	112	1	185
PVP01_1319400	103	101	81	91	1	221
PVP01_0528300	104	126	153	123	1	398
PVP01_1435400	104	63	62	74	1	4
PVP01_1218700	105	139	88	111	1	9
PVP01_1436800	106	83	116	100	1	270
PVP01_0912800	107	70	80	82	1	158
PVP01_1117400	107	94	99	99	1	97
PVP01_1311000	108	155	186	145	1	18
PVP01_0618400	109	97	125	108	1	190
PVP01_0807300	110	67	102	86	2	778
PVP01_0108700	111	236	93	142	1	12
PVP01_1026100	112	90	130	107	1	254
PVP01_1439100	113	146	121	126	1	314
PVP01_1010500	114	78	106	93	1	46
PVP01_0607800	115	152	119	131	2	765
PVP01_1124900	116	138	169	140	2	932
PVP01_1032700	117	105	78	98	1	354
PVP01_1403100	118	227	175	164	1	11
PVP01_0216000	119	157	179	151	1	170
PVP01_0418100	119	72	65	80	3	1265
PVP01_0516800	120	102	157	124	1	322
PVP01_0526600	121	91	95	103	1	167
PVP01_0517200	122	144	129	135	1	281
PVP01_1425800	123	134	128	130	2	1037
PVP01_1440500	123	124	164	134	3	1515
PVP01_1316800	124	106	143	125	1	282
PVP01_1136000	125	64	86	85	1	160
PVP01_1404300	126	166	185	156	1	310
PVP01_1245500	127	93	131	117	1	107
PVP01_1427800	128	110	163	128	1	126
PVP01_0615300	129	44	79	73	1	132
PVP01_0925500	130	177	147	155	1	90
PVP01_1315300	131	82	133	116	1	137
PVP01_1030500	132	148	117	138	2	587
PVP01_0418900	133	99	92	110	1	346
PVP01_1305400	134	187	188	167	1	549
PVP01_0729600	135	114	94	118	1	244
PVP01_1105900	136	154	127	144	1	380
PVP01_1119800	137	217	282	195	3	1414
PVP01_1429700	138	274	171	180	1	66
PVP01_0607900	139	84	140	121	1	159
PVP01_1247100	140	170	135	152	1	52
PVP01_1002700	141	294	214	203	1	522
PVP01_1251200	141	143	151	148	1	222
PVP01_1252500	142	88	128	120	1	75
PVP01_1262200	143	128	122	136	1	50
PVP01_0530300	144	158	98	139	1	173
PVP01_0717400	145	117	183	146	1	157
PVP01_0714500	146	123	160	143	1	51
PVP01_0210400	147	258	249	210	2	641
PVP01_0813100	148	163	159	158	1	136
PVP01_1436200	149	180	150	163	1	283
PVP01_0718000	150	115	120	127	7	3295
PVP01_1325400	151	297	246	223	1	422
PVP01_1334800	152	117	118	132	4	1692
PVP01_1110800	153	175	191	172	1	355
PVP01_1260400	154	98	85	113	1	135
PVP01_0825500	155	153	96	141	1	177
PVP01_0302700	156	195	265	197	1	131
PVP01_0939800	157	242	202	196	1	265
PVP01_0916500	158	159	181	165	1	58
PVP01_0816500	159	252	247	216	1	258
PVP01_0803200	160	247	224	209	1	407
PVP01_0529800	161	203	243	201	2	674
PVP01_1257900	162	212	178	183	3	1489
PVP01_0214400	163	186	196	181	1	186
PVP01_1227000	164	125	152	149	1	224
PVP01_0715000	165	222	201	193	6	2912
PVP01_0717300	165	274	215	218	1	268
PVP01_1453000	165	103	136	133	1	176
PVP01_1233600	166	174	173	173	1	125
PVP01_1217900	167	160	162	162	1	178
PVP01_0619000	168	172	177	175	1	333
PVP01_1240500	168	169	170	170	5	2175
PVP01_1212200	169	204	189	186	1	89
PVP01_0908100	170	141	107	147	1	139
PVP01_0110600	171	230	191	194	1	475
PVP01_1238400	172	246	302	237	5	2173
PVP01_1461400	173	286	267	239	NA	NA
PVP01_0408100	174	241	222	212	1	524
PVP01_0319900	175	183	204	185	2	605
PVP01_1230400	176	194	272	210	1	111
PVP01_1425500	177	133	148	153	1	53
PVP01_1025900	178	208	193	190	3	1132
PVP01_1334400	179	317	268	253	1	481
PVP01_1115100	180	198	248	208	1	466
PVP01_1121300	181	238	256	225	2	954
PVP01_0710900	182	262	226	224	1	182
PVP01_1121400	182	215	194	198	3	1129
PVP01_1425700	183	112	101	129	1	189
PVP01_1260100	184	193	149	176	1	233
PVP01_0317800	185	243	236	222	1	208
PVP01_1244500	185	267	228	227	1	234
PVP01_1412600	185	278	259	241	1	102
PVP01_1268100	186	145	155	159	1	120
PVP01_1464000	187	192	193	187	1	516
PVP01_1211700	188	132	141	154	5	2478
PVP01_1126400	189	310	337	273	1	142
PVP01_1236500	190	255	250	231	1	443
PVP01_0112100	191	185	134	171	1	259
PVP01_1347000	192	137	177	161	1	295
PVP01_0407400	193	223	216	217	1	255
PVP01_1425900	194	165	192	179	1	156
PVP01_1301900	195	271	235	238	1	273
PVP01_1325300	196	201	225	211	1	128
PVP01_0527800	197	240	257	231	5	2306
PVP01_0609300	198	196	158	182	1	214
PVP01_1256300	198	442	380	315	1	193
PVP01_0906600	199	249	339	259	1	197
PVP01_1207300	200	219	167	191	1	39
PVP01_1342900	201	156	176	174	1	448
PVP01_0712200	202	136	57	119	2	677
PVP01_0508100	203	214	216	215	1	353
PVP01_0114800	204	191	184	188	2	737
PVP01_0947200	205	204	203	207	3	1225
PVP01_1427900	206	224	112	177	1	119
PVP01_0920300	207	188	221	207	3	1328
PVP01_0927100	208	119	199	160	3	1641
PVP01_1112500	208	135	190	168	1	133
PVP01_1132700	209	221	168	200	5	2429
PVP01_0612400	210	233	266	239	1	109
PVP01_1326500	211	200	198	204	1	113
PVP01_0308000	212	277	108	184	1	13
PVP01_1311600	212	149	207	179	1	82
PVP01_1415300	213	141	172	169	2	652
PVP01_1212700	214	151	154	166	1	554
PVP01_1438000	215	217	249	228	1	124
PVP01_0926700	216	168	161	178	1	74
PVP01_1338000	217	312	306	277	1	101
PVP01_0307800	218	196	237	221	1	327
PVP01_0614800	219	261	218	238	1	118
PVP01_1124800	220	257	252	245	7	3274
PVP01_0920800	221	218	200	219	2	619
PVP01_1206600	221	182	217	206	1	78
PVP01_0943000	222	262	240	244	1	338
PVP01_1437200	223	235	225	234	2	607
PVP01_1224800	224	210	174	205	2	1060
PVP01_0115600	225	256	244	248	1	112
PVP01_1456200	226	181	197	202	1	174
PVP01_1426100	227	281	230	252	1	47
PVP01_0206700	228	328	263	274	1	440
PVP01_0834900	229	494	NA	419	2	887
PVP01_0705100	230	263	253	254	1	358
PVP01_1405800	231	258	277	260	3	1387
PVP01_0303800	232	245	189	226	1	70
PVP01_0837700	233	293	222	256	1	303
PVP01_0526700	234	304	353	293	1	349
PVP01_1227100	234	292	242	261	1	218
PVP01_1331300	234	219	225	233	3	1284
PVP01_0806500	235	286	262	264	1	80
PVP01_0921000	236	189	267	230	1	302
PVP01_1226000	236	206	231	230	1	230
PVP01_1440200	237	207	234	235	2	612
PVP01_0621300	238	240	244	249	2	566
PVP01_1143800	238	232	219	239	1	323
PVP01_1431800	238	175	251	220	1	328
PVP01_1261600	239	196	240	229	1	326
PVP01_0721200	240	239	273	257	1	121
PVP01_1457000	241	142	145	168	2	749
PVP01_1441600	242	376	349	318	1	321
PVP01_1271000	243	295	294	281	1	7
PVP01_1218600	244	205	180	213	1	266
PVP01_1332400	245	202	137	189	1	288
PVP01_1445900	245	253	233	251	1	100
PVP01_0939500	246	319	325	296	1	257
PVP01_0907900	247	199	274	246	1	144
PVP01_0720700	248	229	270	258	1	73
PVP01_1456000	249	329	366	313	8	3661
PVP01_0414200	250	311	232	272	1	216
PVP01_0407500	251	176	212	214	1	153
PVP01_1308000	252	335	326	305	5	2372
PVP01_1129300	253	178	165	192	1	143
PVP01_1142400	253	315	336	301	1	441
PVP01_0504400	254	249	261	261	1	196
PVP01_1325800	254	179	229	223	4	1716
PVP01_1022500	255	268	271	267	3	1240
PVP01_1341400	256	306	325	298	1	181
PVP01_1437800	257	264	305	280	3	1196
PVP01_0521400	258	291	166	242	1	261
PVP01_1221600	258	233	247	255	1	212
PVP01_0418000	259	290	171	243	1	48
PVP01_0923600	260	323	260	286	1	250
PVP01_1437000	260	259	268	266	1	390
PVP01_0303300	261	273	230	262	1	496
PVP01_1455000	262	250	298	276	1	209
PVP01_0609100	263	365	351	325	1	447
PVP01_0526400	264	237	213	250	7	3335
PVP01_0316000	265	197	211	232	3	1288
PVP01_0823000	266	298	223	268	1	117
PVP01_1435200	266	237	307	275	2	1106
PVP01_0703500	267	282	295	289	1	453
PVP01_1450600	268	344	350	321	2	618
PVP01_1122200	269	357	292	310	1	219
PVP01_1267500	270	296	288	290	2	1038
PVP01_1226900	271	299	234	278	2	781
PVP01_0718200	272	287	348	307	2	685
PVP01_0520500	273	181	238	240	2	695
PVP01_0903900	274	363	239	294	1	95
PVP01_0917900	275	226	257	263	1	357
PVP01_1027500	276	434	351	357	1	503
PVP01_0215200	277	429	328	344	1	454
PVP01_1307900	278	265	241	269	1	194
PVP01_0733200	279	248	314	287	1	220
PVP01_0415700	280	401	345	343	1	424
PVP01_1208500	281	425	296	335	1	204
PVP01_0905700	282	322	278	301	2	848
PVP01_1261400	283	338	330	322	1	417
PVP01_1215200	284	337	258	300	1	492
PVP01_1232800	284	210	336	282	1	103
PVP01_0105700	285	422	416	391	5	2321
PVP01_1103500	285	264	264	281	1	499
PVP01_1255300	286	424	345	364	2	681
PVP01_1420300	287	376	308	333	2	849
PVP01_1246800	288	233	301	284	1	150
PVP01_0917300	289	173	146	199	1	423
PVP01_0804200	290	330	323	326	1	317
PVP01_0716500	291	251	275	283	1	67
PVP01_1427200	292	398	369	370	1	468
PVP01_1465600	292	260	227	271	1	38
PVP01_1315200	293	318	327	324	1	262
PVP01_0810100	294	301	284	303	1	482
PVP01_1218400	295	388	485	403	1	184
PVP01_1341200	295	276	301	297	1	480
PVP01_0212900	296	211	255	265	1	166
PVP01_1454700	297	164	182	208	1	201
PVP01_1447500	298	509	281	366	1	385
PVP01_0509500	299	405	383	379	1	512
PVP01_1330100	299	109	124	157	NA	NA
PVP01_1342500	299	400	402	387	1	405
PVP01_0521100	300	395	309	341	1	198
PVP01_1013800	300	333	238	299	1	311
PVP01_0204500	301	328	279	314	2	589
PVP01_1317300	302	427	391	395	2	1034
PVP01_0720500	303	358	341	342	2	700
PVP01_1431700	304	284	297	306	2	572
PVP01_1202900	305	305	315	319	1	260
PVP01_1105100	306	390	318	350	1	555
PVP01_1253300	307	209	269	271	1	79
PVP01_1449800	308	324	356	340	3	1135
PVP01_0814600	309	416	382	394	1	368
PVP01_1462800	309	288	304	311	2	574
PVP01_1122700	310	419	315	362	1	231
PVP01_0421300	311	228	314	293	1	146
PVP01_1331700	311	408	361	383	2	588
PVP01_1014900	312	361	351	356	1	451
PVP01_1105500	313	216	309	288	2	1002
PVP01_1416800	314	289	241	292	4	2152
PVP01_0529400	315	409	373	391	2	724
PVP01_1125500	315	307	315	327	1	172
PVP01_1419200	315	411	305	353	2	650
PVP01_0908800	316	342	316	338	1	341
PVP01_0945600	317	303	272	308	1	180
PVP01_1459000	317	325	363	347	1	248
PVP01_0307900	318	401	290	346	1	15
PVP01_0418200	318	314	337	337	2	586
PVP01_1110300	319	430	356	395	7	3105
PVP01_1225700	319	431	367	399	2	844
PVP01_0205700	320	NA	369	493	1	497
PVP01_1260300	321	397	368	389	1	263
PVP01_1262700	321	275	293	304	1	203
PVP01_0315200	322	355	383	371	2	713
PVP01_0713000	323	220	283	286	2	627
PVP01_1203900	324	298	285	316	1	386
PVP01_0421000	325	348	282	331	2	732
PVP01_0836900	326	369	337	361	1	141
PVP01_1263200	326	373	422	397	1	296
PVP01_0708700	327	349	398	377	2	1024
PVP01_1269300	328	364	333	358	2	1062
PVP01_0618800	329	380	360	381	1	122
PVP01_0713400	330	515	300	400	1	369
PVP01_0819100	331	428	347	396	2	883
PVP01_1468200	332	313	289	328	1	459
PVP01_1211900	333	362	344	367	1	508
PVP01_1306200	334	340	376	372	2	723
PVP01_0118300	335	445	359	407	2	1095
PVP01_0813900	336	285	205	285	1	299
PVP01_1308200	336	375	340	373	1	410
PVP01_0315800	337	416	378	406	1	498
PVP01_0947700	337	420	419	420	NA	NA
PVP01_1124500	337	283	239	295	1	279
PVP01_1228500	338	352	255	323	2	656
PVP01_1305500	338	381	317	368	1	429
PVP01_0713300	339	413	310	376	1	275
PVP01_0532300	340	340	310	344	3	1524
PVP01_0701700	341	333	324	350	2	1065
PVP01_1265200	342	357	331	365	1	245
PVP01_0316100	343	367	346	380	1	256
PVP01_0705500	343	NA	NA	633	1	486
PVP01_0409400	344	371	343	383	1	365
PVP01_1460600	344	171	220	247	1	367
PVP01_0618200	345	389	319	378	1	123
PVP01_1023500	345	429	339	402	1	348
PVP01_1430400	345	448	380	423	1	465
PVP01_0937400	346	369	344	383	1	378
PVP01_1004000	346	286	303	321	1	171
PVP01_1134900	347	491	380	436	2	827
PVP01_1265400	348	272	280	309	2	747
PVP01_0920900	349	330	318	349	2	631
PVP01_0922200	349	452	291	390	1	434
PVP01_1215100	349	441	365	415	2	920
PVP01_1238700	350	382	373	401	1	487
PVP01_0714700	351	417	363	409	1	294
PVP01_1335200	352	476	408	445	2	675
PVP01_0602200	353	331	NA	456	1	154
PVP01_1212800	354	269	221	291	5	2409
PVP01_1305800	354	387	386	408	1	91
PVP01_0811900	355	345	313	359	2	801
PVP01_1139800	356	316	332	354	1	457
PVP01_0713200	357	455	381	430	3	1239
PVP01_1014800	357	396	300	374	3	1236
PVP01_1202400	357	266	424	352	1	290
PVP01_0933200	358	431	418	432	1	426
PVP01_0316300	359	449	540	481	2	1019
PVP01_1103600	359	368	332	382	1	291
PVP01_0317700	360	360	342	384	1	396
PVP01_0947600	361	492	NA	541	1	280
PVP01_0405600	362	281	245	304	1	391
PVP01_0118400	363	408	387	419	1	331
PVP01_0921700	364	338	310	355	3	1399
PVP01_1005500	364	402	NA	495	2	867
PVP01_1103100	364	574	428	493	1	205
PVP01_1416300	364	NA	413	549	1	99
PVP01_1404900	365	329	338	368	1	507
PVP01_0207300	366	453	428	451	2	869
PVP01_1208400	366	528	363	456	3	1574
PVP01_0522500	367	428	NA	508	2	1067
PVP01_1026000	368	353	254	334	1	105
PVP01_1435700	368	358	339	386	2	905
PVP01_0615400	369	385	412	421	1	445
PVP01_0305200	370	213	208	271	3	1290
PVP01_1437400	370	392	NA	494	1	149
PVP01_0531800	371	320	470	410	2	1003
PVP01_1330800	372	550	487	513	1	351
PVP01_0705900	373	370	334	392	1	413
PVP01_1116800	373	446	422	450	1	312
PVP01_1224900	373	NA	NA	654	1	347
PVP01_1120300	374	377	390	411	3	1275
PVP01_0609400	375	447	304	404	6	2705
PVP01_1309300	375	308	280	336	1	438
PVP01_0514700	376	435	413	439	1	315
PVP01_1330900	377	436	423	444	1	389
PVP01_0203400	378	597	481	536	1	444
PVP01_0728800	379	498	NA	554	1	207
PVP01_1236600	379	489	377	457	1	345
PVP01_1423500	379	308	332	360	2	951
PVP01_1206200	380	451	364	432	1	238
PVP01_1429400	381	447	326	416	2	819
PVP01_1435100	382	270	312	330	2	1049
PVP01_0616800	383	427	361	425	1	335
PVP01_0506100	384	422	409	437	1	464
PVP01_1456400	385	469	371	446	1	539
PVP01_1418300	386	327	337	375	1	289
PVP01_1017600	387	343	NA	479	1	342
PVP01_0617600	388	351	321	385	1	518
PVP01_0816100	389	309	266	332	2	717
PVP01_1022700	390	511	440	486	1	461
PVP01_0942500	391	492	100	279	1	130
PVP01_1218000	391	302	386	388	1	138
PVP01_1454200	391	330	313	369	3	1245
PVP01_0309100	392	283	327	345	1	253
PVP01_1304300	393	350	347	398	3	1347
PVP01_0509300	394	493	401	473	1	493
PVP01_0933600	395	161	187	236	1	425
PVP01_1123100	396	231	287	312	3	1148
PVP01_1321600	396	326	264	339	NA	NA
PVP01_0928600	397	386	383	426	2	603
PVP01_1304900	397	477	392	468	3	1494
PVP01_1021700	398	464	400	465	2	625
PVP01_0607700	399	326	276	348	2	591
PVP01_1129800	399	574	517	556	2	723
PVP01_0927300	400	379	NA	505	3	1346
PVP01_0920700	401	359	318	393	2	601
PVP01_0806600	402	415	NA	530	2	664
PVP01_0810500	402	279	243	317	7	3266
PVP01_1249000	403	529	523	542	4	1914
PVP01_1404200	403	244	335	333	7	3346
PVP01_1023900	404	447	401	462	4	2084
PVP01_0115300	405	437	335	428	1	93
PVP01_1105700	405	476	496	504	4	1916
PVP01_1319300	406	445	333	431	3	1314
PVP01_1247500	407	418	401	453	2	628
PVP01_0928500	408	429	411	460	1	563
PVP01_1303000	408	476	440	483	1	286
PVP01_0707800	409	364	608	501	2	1005
PVP01_0104400	410	517	360	474	1	472
PVP01_1129100	411	410	429	458	1	127
PVP01_1022000	412	NA	372	568	1	550
PVP01_1300800	413	300	314	363	1	373
PVP01_1449600	413	401	326	414	2	739
PVP01_1463500	414	280	NA	450	1	343
PVP01_0513200	415	450	NA	557	2	783
PVP01_1442400	416	437	344	435	1	199
PVP01_1435500	417	461	454	489	1	300
PVP01_0818400	418	457	450	483	2	617
PVP01_1327800	419	407	608	535	1	211
PVP01_1440300	419	446	355	452	7	3400
PVP01_1461200	420	554	NA	615	2	762
PVP01_1468900	421	417	412	463	1	381
PVP01_0823100	422	419	NA	545	2	782
PVP01_1221500	422	528	466	525	2	902
PVP01_1454900	423	NA	486	629	6	2806
PVP01_0717500	424	412	385	449	2	993
PVP01_1461000	425	550	590	600	2	1079
PVP01_1213700	426	246	296	329	NA	NA
PVP01_1130500	427	460	403	477	1	359
PVP01_1214000	428	425	441	476	7	3413
PVP01_0313000	429	458	399	476	2	814
PVP01_0928700	430	524	476	533	2	594
PVP01_0512900	431	372	394	434	2	833
PVP01_1269400	431	530	527	560	1	462
PVP01_0508000	432	465	403	480	2	578
PVP01_0945500	433	280	311	351	5	2613
PVP01_0729800	434	477	407	488	1	272
PVP01_1218500	434	234	285	320	2	907
PVP01_0509700	435	537	NA	614	1	364
PVP01_1464600	436	339	385	422	1	491
PVP01_0204300	437	511	381	491	2	659
PVP01_1240700	438	414	441	475	1	366
PVP01_0520900	439	455	274	413	1	384
PVP01_0926100	439	301	NA	478	1	352
PVP01_0727500	440	457	299	429	2	901
PVP01_0107900	441	477	NA	584	3	1456
PVP01_0833000	441	438	431	481	1	191
PVP01_1232600	441	354	369	424	6	2691
PVP01_1234500	442	NA	NA	701	1	306
PVP01_1331500	443	473	442	501	2	918
PVP01_0823500	444	391	NA	543	1	225
PVP01_0212200	445	525	461	538	3	1280
PVP01_1029900	446	462	NA	578	2	830
PVP01_0701400	447	406	352	439	3	1522
PVP01_0724100	447	NA	NA	706	2	674
PVP01_1409300	447	475	262	415	2	577
PVP01_1468000	448	461	NA	579	1	360
PVP01_1002900	449	523	475	546	2	651
PVP01_0717100	450	NA	447	624	1	350
PVP01_0717900	450	NA	370	583	1	285
PVP01_1024000	450	590	430	555	2	580
PVP01_1264900	451	450	NA	574	1	490
PVP01_1422700	451	490	414	502	2	1073
PVP01_0408300	452	292	435	413	4	1684
PVP01_0414000	452	589	448	565	1	228
PVP01_0418300	452	347	347	417	6	2844
PVP01_1326900	452	330	448	438	3	1312
PVP01_0704200	453	499	442	519	2	733
PVP01_0410300	454	417	393	469	3	1422
PVP01_0718500	454	NA	NA	710	1	252
PVP01_0811800	455	440	431	488	2	583
PVP01_0109900	456	484	473	527	1	514
PVP01_0207800	456	NA	NA	712	1	402
PVP01_0733400	457	541	404	524	1	239
PVP01_0809500	457	552	351	503	1	292
PVP01_0817600	458	484	427	507	3	1390
PVP01_1232900	459	495	398	500	3	1394
PVP01_1464100	459	421	366	461	3	1209
PVP01_1467700	459	NA	417	614	1	400
PVP01_0701900	460	498	457	528	1	240
PVP01_1265500	461	386	437	472	1	471
PVP01_0814000	462	477	NA	598	1	540
PVP01_0932800	462	388	362	442	1	435
PVP01_1116200	462	515	494	553	3	1420
PVP01_0603900	463	379	406	459	2	1015
PVP01_1022200	464	NA	415	617	1	147
PVP01_1325700	464	696	450	632	1	325
PVP01_0706300	465	NA	209	467	2	755
PVP01_1412500	465	485	353	481	1	439
PVP01_0937800	466	487	400	501	3	1308
PVP01_1340900	467	394	357	448	3	1513
PVP01_1012600	468	568	206	415	3	1433
PVP01_1261500	469	414	458	491	3	1120
PVP01_1137400	470	446	385	480	1	564
PVP01_0418700	471	453	NA	586	2	1040
PVP01_1405200	472	541	432	547	2	693
PVP01_0318400	473	NA	NA	723	3	1149
PVP01_0620000	473	486	476	540	2	874
PVP01_0726600	473	516	354	498	2	899
PVP01_0908600	473	443	NA	582	3	1487
PVP01_1441300	474	140	318	270	1	200
PVP01_0920600	475	506	412	521	1	509
PVP01_1425600	476	354	386	440	3	1262
PVP01_0529100	477	423	453	499	2	1075
PVP01_0109700	478	410	459	495	3	1153
PVP01_0613600	479	469	437	517	1	442
PVP01_1028200	480	493	NA	618	3	1178
PVP01_1341500	480	422	NA	575	1	298
PVP01_1259900	481	501	NA	623	1	395
PVP01_0823200	482	433	464	509	2	604
PVP01_0927800	482	404	444	487	2	879
PVP01_1227700	483	378	358	443	2	731
PVP01_1418500	483	542	NA	643	1	227
PVP01_0511800	484	341	332	418	3	1164
PVP01_0109500	485	NA	396	620	1	526
PVP01_0810200	485	321	378	427	1	305
PVP01_1138300	485	531	NA	640	1	362
PVP01_1146700	485	424	432	494	1	217
PVP01_1238900	485	535	434	550	3	1391
PVP01_1421400	485	NA	379	610	2	670
PVP01_0915000	486	543	515	589	1	530
PVP01_1011000	486	521	472	562	2	1115
PVP01_1422500	487	374	NA	552	1	320
PVP01_0316800	488	587	546	630	1	557
PVP01_1269800	488	576	505	606	7	3139
PVP01_1240400	489	544	NA	647	2	763
PVP01_1245400	489	241	210	302	1	431
PVP01_1344700	489	336	322	412	1	485
PVP01_1466400	490	560	NA	655	1	521
PVP01_0105600	491	423	473	514	2	602
PVP01_1145300	492	481	NA	618	2	953
PVP01_0616700	493	591	523	625	3	1133
PVP01_0911100	494	429	395	485	2	669
PVP01_1248300	494	423	351	471	2	1044
PVP01_1465800	494	483	503	562	5	2603
PVP01_0108100	495	437	453	512	2	660
PVP01_1021400	496	556	426	565	2	708
PVP01_1020600	497	493	NA	628	4	1664
PVP01_1119100	497	518	486	570	2	666
PVP01_0512300	498	520	374	522	1	388
PVP01_0921100	499	378	521	511	2	694
PVP01_1139500	499	NA	449	649	3	1174
PVP01_1334500	500	577	513	613	2	845
PVP01_0710500	501	539	419	553	2	1102
PVP01_0726650	501	NA	445	648	NA	NA
PVP01_0728700	501	485	487	557	2	972
PVP01_0733300	501	396	361	464	1	235
PVP01_0814700	501	504	453	551	2	910
PVP01_0730200	502	584	439	580	1	449
PVP01_0926900	503	447	438	516	1	339
PVP01_0111100	504	552	443	571	2	911
PVP01_0819700	504	569	350	532	2	931
PVP01_1456600	504	NA	NA	739	3	1519
PVP01_1344000	505	474	NA	622	2	752
PVP01_1466700	505	NA	NA	740	3	1224
PVP01_1025000	506	NA	407	636	1	319
PVP01_0421200	507	505	435	548	2	798
PVP01_0813300	507	508	373	520	4	2006
PVP01_1030300	507	503	397	530	2	930
PVP01_1341300	507	508	NA	639	3	1247
PVP01_1454400	507	523	NA	645	3	1293
PVP01_1464200	507	519	NA	644	1	383
PVP01_0516600	508	548	486	592	1	401
PVP01_1440800	509	586	518	627	6	3026
PVP01_0521200	510	518	463	569	2	620
PVP01_1213400	510	369	NA	561	1	293
PVP01_0825900	511	NA	410	642	5	2221
PVP01_0835800	511	399	490	518	2	776
PVP01_1008600	511	NA	565	711	4	1771
PVP01_1118100	511	510	460	563	1	562
PVP01_1020400	512	542	NA	657	1	427
PVP01_1024700	513	NA	395	634	1	361
PVP01_1265000	513	546	NA	660	3	1400
PVP01_1002800	514	NA	509	680	1	206
PVP01_0701600	515	470	419	526	1	284
PVP01_0619900	516	393	426	490	2	785
PVP01_1312500	516	526	426	558	1	488
PVP01_0832700	517	NA	NA	745	1	460
PVP01_0943600	517	400	320	454	2	746
PVP01_1119900	517	522	448	566	2	817
PVP01_0828900	518	536	505	602	2	663
PVP01_1124400	518	459	429	523	4	2143
PVP01_0734300	519	547	433	572	5	2418
PVP01_1118400	519	604	417	593	2	1063
PVP01_1111300	520	436	412	506	3	1590
PVP01_1260800	520	513	482	576	2	839
PVP01_1214500	521	NA	NA	750	3	1526
PVP01_1467800	521	576	NA	674	2	1083
PVP01_0720600	522	480	465	557	2	679
PVP01_1331100	522	334	376	447	4	1784
PVP01_0505300	523	NA	NA	753	1	202
PVP01_1305000	524	NA	NA	754	2	884
PVP01_1417400	524	537	496	603	2	684
PVP01_0117200	525	466	450	544	1	529
PVP01_1011500	525	611	570	666	7	3116
PVP01_0103800	526	484	NA	638	3	1502
PVP01_0415100	526	NA	435	657	1	318
PVP01_0513100	526	332	389	455	2	638
PVP01_0204700	527	444	363	496	1	344
PVP01_0819300	528	509	NA	650	1	162
PVP01_0416700	529	567	NA	675	2	864
PVP01_0924900	529	497	385	531	1	393
PVP01_1224200	529	483	440	550	1	473
PVP01_0205400	530	NA	NA	758	1	229
PVP01_1333800	530	NA	NA	758	2	956
PVP01_1415900	530	366	279	415	2	1053
PVP01_0905000	531	538	519	616	1	324
PVP01_1027200	531	NA	NA	760	1	556
PVP01_1427000	531	552	485	609	1	148
PVP01_1304100	532	582	492	627	2	585
PVP01_1303200	533	327	375	446	4	1965
PVP01_1441500	534	486	482	572	2	1039
PVP01_0730800	535	537	488	605	3	1633
PVP01_0421700	536	609	388	590	2	1082
PVP01_0723500	536	356	405	475	4	1794
PVP01_0409600	537	502	512	596	2	598
PVP01_1343500	537	393	403	492	5	2270
PVP01_1466900	537	599	NA	697	2	719
PVP01_0505700	538	524	490	600	3	1442
PVP01_1106200	538	544	427	577	3	1268
PVP01_1315600	538	500	513	597	3	1446
PVP01_1437100	539	525	494	603	3	1234
PVP01_0602900	540	585	NA	691	2	982
PVP01_0603800	540	494	NA	650	4	2046
PVP01_0913900	540	485	464	569	2	571
PVP01_0617700	541	454	NA	630	2	881
PVP01_1120400	541	NA	NA	767	1	502
PVP01_0116200	542	583	NA	691	1	436
PVP01_1233700	543	514	NA	659	2	699
PVP01_0214300	544	547	482	610	1	523
PVP01_0602400	544	467	527	587	2	1087
PVP01_0607000	545	506	425	564	1	558
PVP01_1217800	545	545	462	601	1	412
PVP01_0807800	546	551	526	635	3	1334
PVP01_1415400	547	520	493	604	7	3115
PVP01_0932700	548	478	443	559	3	1155
PVP01_0938100	548	575	NA	689	2	946
PVP01_0945000	548	456	427	539	6	2717
PVP01_0948300	548	NA	505	700	2	665
PVP01_1211800	549	NA	472	683	2	1032
PVP01_1418400	549	384	430	500	3	1216
PVP01_0802600	550	579	499	636	2	904
PVP01_1106300	551	512	NA	661	5	2636
PVP01_1010000	552	NA	NA	773	7	3192
PVP01_1312000	552	436	297	466	1	307
PVP01_1428900	552	NA	NA	773	1	456
PVP01_0010840	553	NA	503	704	1	21
PVP01_1251500	553	555	NA	682	1	495
PVP01_0311800	554	530	NA	672	2	711
PVP01_1009700	554	383	369	482	1	517
PVP01_1211500	555	531	501	619	2	624
PVP01_0924100	556	NA	NA	777	2	1020
PVP01_0931900	556	591	NA	705	2	728
PVP01_1430900	556	597	NA	709	2	688
PVP01_0416300	557	554	469	615	1	316
PVP01_1011700	557	450	398	529	2	852
PVP01_0614500	558	484	442	567	3	1145
PVP01_0708100	558	616	NA	722	2	860
PVP01_0719400	558	491	286	482	2	644
PVP01_1270500	558	500	470	585	1	505
PVP01_1211400	559	461	493	576	2	741
PVP01_1264600	559	652	588	721	4	1679
PVP01_0804000	560	NA	479	696	2	894
PVP01_1028700	560	NA	NA	781	2	682
PVP01_1141800	560	426	441	534	3	1128
PVP01_0504900	561	642	NA	734	3	1438
PVP01_0942400	561	NA	195	484	4	1864
PVP01_1223600	561	555	420	594	2	1088
PVP01_1343000	561	NA	NA	782	1	484
PVP01_1302200	562	619	554	681	2	634
PVP01_1310000	562	NA	NA	783	1	394
PVP01_1435000	562	NA	NA	783	1	309
PVP01_0319800	563	509	510	611	3	1412
PVP01_0812900	563	NA	NA	784	1	474
PVP01_0940300	564	579	438	613	1	452
PVP01_1417200	564	503	439	574	4	1731
PVP01_0813500	565	606	459	640	1	406
PVP01_0410900	566	NA	NA	787	1	408
PVP01_1202300	566	490	505	605	1	297
PVP01_1458900	566	558	NA	693	2	781
PVP01_1463400	567	620	534	678	3	1302
PVP01_0706500	568	594	530	665	2	616
PVP01_0617300	569	NA	510	715	3	1160
PVP01_1324800	569	486	468	581	1	330
PVP01_1306400	570	NA	416	668	7	3450
PVP01_1458600	570	NA	482	701	1	419
PVP01_0106600	571	466	470	573	1	543
PVP01_0216200	571	560	509	643	4	2021
PVP01_1449200	571	NA	NA	791	4	1887
PVP01_1135200	572	565	509	645	2	989
PVP01_0410000	573	NA	436	679	5	2245
PVP01_0707900	574	NA	NA	793	2	1081
PVP01_1456300	574	507	503	612	2	703
PVP01_1265100	575	NA	NA	794	2	790
PVP01_0308400	576	NA	NA	795	1	428
PVP01_0521000	576	NA	467	697	1	535
PVP01_1028500	576	NA	494	713	2	870
PVP01_1110900	576	NA	NA	795	1	308
PVP01_0915400	577	561	417	607	2	726
PVP01_1319200	577	NA	NA	796	4	1803
PVP01_1017300	578	NA	465	698	1	500
PVP01_1269500	578	561	533	658	1	397
PVP01_0420400	579	266	520	470	5	2345
PVP01_0821600	579	NA	NA	798	4	1800
PVP01_1407600	579	578	483	643	3	1562
PVP01_0528200	580	NA	NA	800	4	1924
PVP01_0722800	580	533	478	622	4	1720
PVP01_1231100	580	NA	451	690	3	1437
PVP01_0929800	581	439	403	537	1	251
PVP01_1203300	581	612	NA	730	1	223
PVP01_1311100	581	542	NA	693	3	1434
PVP01_1457100	581	NA	506	723	2	734
PVP01_0826200	582	NA	NA	802	1	504
PVP01_0923300	583	482	444	576	2	921
PVP01_1015300	584	564	452	626	2	897
PVP01_1232300	584	468	495	597	4	1874
PVP01_1232500	584	527	522	641	4	1676
PVP01_0724700	585	592	396	611	2	985
PVP01_0932000	585	562	440	621	3	1579
PVP01_1031400	586	NA	NA	805	7	3391
PVP01_0822900	587	601	NA	728	3	1535
PVP01_0948200	587	605	471	654	1	559
PVP01_0830000	588	NA	NA	806	3	1531
PVP01_1221400	588	533	NA	690	2	614
PVP01_1439300	589	593	520	667	3	1491
PVP01_0834700	590	NA	NA	808	4	1745
PVP01_1103800	590	554	527	656	1	416
PVP01_0109300	591	209	436	405	5	2472
PVP01_0303200	591	549	NA	702	2	891
PVP01_0531000	592	573	521	664	3	1481
PVP01_0618500	593	NA	NA	812	1	301
PVP01_1232100	593	NA	NA	812	1	329
PVP01_1329100	593	NA	546	749	1	340
PVP01_1321900	594	642	520	697	2	933
PVP01_1329700	595	561	498	651	2	786
PVP01_1117200	596	NA	NA	815	2	650
PVP01_1453500	596	NA	NA	815	4	1892
PVP01_0103500	597	491	426	580	2	720
PVP01_0532100	597	631	NA	750	2	1085
PVP01_0724400	598	449	492	588	2	730
PVP01_1137600	598	574	506	660	3	1560
PVP01_0729000	599	NA	NA	817	1	532
PVP01_1131000	599	NA	NA	817	3	1136
PVP01_1253100	599	556	527	662	1	519
PVP01_1305300	599	628	NA	749	2	698
PVP01_1338600	599	562	NA	714	5	2329
PVP01_1415800	599	550	NA	708	2	922
PVP01_1453400	599	639	NA	756	2	1103
PVP01_0422000	600	586	NA	726	3	1324
PVP01_0723700	600	NA	NA	818	2	873
PVP01_1121800	600	566	560	679	3	1404
PVP01_1132900	601	624	528	695	3	1186
PVP01_0415000	602	571	NA	721	1	175
PVP01_1258100	602	NA	NA	819	6	2908
PVP01_1417300	602	520	487	631	3	1155
PVP01_1126600	603	585	NA	727	8	3577
PVP01_1245200	603	576	NA	725	1	494
PVP01_1249300	603	593	508	669	1	415
PVP01_1205900	604	NA	520	742	3	1219
PVP01_1248600	604	NA	NA	821	2	637
PVP01_1405900	604	605	NA	740	2	928
PVP01_1455500	604	NA	531	747	2	636
PVP01_0416400	605	631	NA	757	3	1266
PVP01_1016000	605	NA	NA	822	2	1084
PVP01_1420000	605	472	466	595	2	1017
PVP01_0913700	606	581	NA	727	3	1282
PVP01_1006300	606	603	NA	741	1	336
PVP01_1030600	607	NA	NA	825	1	374
PVP01_1133000	607	NA	497	731	2	987
PVP01_1306600	607	608	552	703	3	1360
PVP01_0317000	608	254	446	441	2	673
PVP01_1225900	608	487	NA	676	3	1443
PVP01_1248400	609	619	564	715	2	714
PVP01_1423300	609	NA	580	788	2	787
PVP01_0930500	610	563	453	639	2	581
PVP01_1440900	610	490	404	577	3	1286
PVP01_0937900	611	607	477	666	NA	NA
PVP01_1130100	611	608	NA	744	1	140
PVP01_0515500	612	NA	NA	828	1	545
PVP01_1232700	613	NA	468	720	2	942
PVP01_1312600	613	601	514	680	5	2474
PVP01_1343800	613	532	478	637	2	1104
PVP01_0212300	614	NA	562	772	2	824
PVP01_1005600	614	614	NA	752	2	622
PVP01_1247400	614	NA	538	762	4	1781
PVP01_1412400	614	NA	NA	830	2	751
PVP01_1135400	615	NA	554	770	1	399
PVP01_0714400	616	516	529	652	2	1094
PVP01_1346200	616	NA	532	759	2	632
PVP01_0508800	617	NA	NA	834	1	375
PVP01_0531400	617	NA	495	737	2	935
PVP01_1117100	617	641	476	687	1	433
PVP01_0702100	618	NA	NA	835	1	420
PVP01_0810400	618	361	417	515	4	1945
PVP01_1316100	618	604	477	670	3	1620
PVP01_0308500	619	NA	NA	836	1	387
PVP01_1226200	620	NA	NA	838	3	1488
PVP01_1256900	620	NA	NA	838	3	1472
PVP01_1002400	621	NA	NA	839	2	691
PVP01_1450900	621	567	NA	730	3	1144
PVP01_0109000	622	490	493	631	3	1249
PVP01_0944900	622	NA	NA	840	3	1257
PVP01_1233000	622	NA	NA	840	1	515
PVP01_MIT02700	623	603	413	647	8	3630
PVP01_0924200	624	642	NA	778	3	1374
PVP01_0511000	625	NA	NA	842	2	658
PVP01_1339600	625	575	535	686	3	1211
PVP01_0104300	626	605	546	712	4	2055
PVP01_0508900	627	597	NA	750	3	1523
PVP01_1455600	627	NA	NA	844	3	1358
PVP01_0722100	628	NA	566	792	4	2011
PVP01_1141400	629	NA	478	735	2	1107
PVP01_1205300	630	NA	NA	847	3	1269
PVP01_1220700	630	NA	NA	847	3	1599
PVP01_1459600	630	645	524	724	4	1677
PVP01_0719100	631	563	481	663	3	1591
PVP01_0933900	631	644	NA	790	3	1117
PVP01_0304200	632	642	428	673	1	269
PVP01_1305900	632	546	NA	726	5	2485
PVP01_1432400	632	463	NA	678	3	1544
PVP01_1423100	633	422	328	510	2	816
PVP01_1333900	634	NA	NA	852	8	3510
PVP01_1216200	635	NA	471	734	6	2955
PVP01_1422100	636	635	557	737	3	1635
PVP01_0946000	637	NA	NA	856	2	847
PVP01_1435800	637	559	NA	734	4	1780
PVP01_1030700	638	NA	NA	857	8	3697
PVP01_1306100	638	655	570	761	5	2166
PVP01_0917800	639	625	NA	778	2	1112
PVP01_0918800	639	633	464	688	2	807
PVP01_1339100	639	NA	490	746	2	974
PVP01_0941400	640	NA	563	799	3	1645
PVP01_1146300	640	NA	NA	858	2	1036
PVP01_1417000	640	615	518	710	2	633
PVP01_0928900	641	NA	NA	859	2	915
PVP01_0729400	642	665	541	748	4	1929
PVP01_1334300	642	NA	NA	860	4	1821
PVP01_1410700	642	NA	NA	860	5	2360
PVP01_1025600	643	NA	NA	861	2	584
PVP01_1108200	643	654	554	751	4	1826
PVP01_1146200	643	NA	NA	861	3	1281
PVP01_1011100	644	NA	NA	862	4	1990
PVP01_1239900	644	NA	NA	862	3	1341
PVP01_1451500	644	555	NA	736	7	3353
PVP01_0304400	645	NA	NA	863	2	651
PVP01_0320000	645	NA	NA	863	2	903
PVP01_1312300	645	NA	NA	863	2	857
PVP01_0836100	646	NA	569	809	3	1198
PVP01_1233500	646	NA	NA	864	2	777
PVP01_1405300	647	NA	485	747	2	890
PVP01_0110400	648	643	NA	802	4	1991
PVP01_0507400	648	NA	572	817	2	1080
PVP01_0526800	648	NA	565	809	5	2196
PVP01_1468700	648	635	NA	795	2	696
PVP01_0315900	649	NA	NA	866	3	1507
PVP01_0905800	649	594	510	698	1	506
PVP01_1242500	649	NA	NA	866	3	1220
PVP01_1317200	649	679	553	771	5	2246
PVP01_1321200	649	NA	509	767	3	1339
PVP01_0210500	650	NA	NA	867	2	683
PVP01_0521300	650	NA	NA	867	6	2721
PVP01_0611200	650	656	NA	817	3	1318
PVP01_0945300	650	NA	NA	867	3	1407
PVP01_1122400	650	NA	NA	867	3	1505
PVP01_1121600	651	NA	548	798	2	851
PVP01_1230300	651	NA	NA	868	3	1202
PVP01_1346800	651	NA	549	799	1	547
PVP01_0820600	652	NA	NA	871	1	538
PVP01_0948400	652	643	489	716	3	1246
PVP01_1430000	653	603	520	713	4	1850
PVP01_0512400	654	NA	NA	872	3	1542
PVP01_1437700	654	559	528	692	6	2968
PVP01_0818500	655	NA	564	815	4	2030
PVP01_1145900	655	621	NA	791	3	1336
PVP01_1403500	655	NA	NA	873	1	467
PVP01_0527200	656	NA	NA	874	2	882
PVP01_1121700	656	552	522	685	4	1865
PVP01_0406800	657	645	NA	813	3	1483
PVP01_0508200	657	606	NA	777	6	2698
PVP01_0618300	657	NA	578	829	6	2682
PVP01_1339000	657	634	NA	802	2	761
PVP01_1339500	657	NA	NA	875	2	963
PVP01_0712900	658	613	559	738	3	1317
PVP01_1019400	658	NA	NA	876	7	3111
PVP01_1314000	658	NA	NA	876	7	3112
PVP01_1112700	659	580	NA	763	2	646
PVP01_1256600	659	NA	NA	878	4	1773
PVP01_0419200	660	NA	NA	884	3	1328
PVP01_1137800	660	NA	NA	884	3	1255
PVP01_1320900	660	675	NA	843	4	2064
PVP01_0837900	661	615	NA	794	2	976
PVP01_1004500	661	640	565	766	2	831
PVP01_1011600	661	NA	NA	885	2	1033
PVP01_0714800	662	NA	NA	886	4	1895
PVP01_1003300	662	663	NA	836	2	999
PVP01_0946800	663	NA	NA	887	4	1718
PVP01_1117300	663	NA	544	810	5	2388
PVP01_1210700	663	NA	563	824	4	1667
PVP01_1429000	663	652	NA	828	3	1498
PVP01_1014400	664	667	NA	841	3	1648
PVP01_1341100	664	NA	NA	888	4	2053
PVP01_0602000	665	NA	NA	890	1	510
PVP01_1334900	666	613	NA	797	6	2988
PVP01_1457900	666	660	NA	839	4	2111
PVP01_0204600	667	NA	NA	893	3	1499
PVP01_0708800	667	NA	NA	893	3	1184
PVP01_0105500	668	NA	NA	894	5	2591
PVP01_1111000	668	NA	NA	894	8	3541
PVP01_1246500	668	596	NA	785	1	489
PVP01_1458000	668	NA	NA	894	2	657
PVP01_0906400	669	NA	NA	895	3	1191
PVP01_1106100	669	NA	NA	895	2	766
PVP01_1429300	669	625	558	756	4	1710
PVP01_1140500	670	NA	NA	896	4	1738
PVP01_1234900	671	NA	NA	897	3	1410
PVP01_1403000	671	NA	NA	897	4	1841
PVP01_0717800	672	588	NA	778	5	2163
PVP01_1419300	673	NA	NA	899	4	1903
PVP01_1441200	674	612	NA	803	4	1906
PVP01_0517400	675	562	466	677	2	1061
PVP01_0709100	675	NA	NA	901	3	1393
PVP01_1226400	675	NA	NA	901	3	1287
PVP01_1263900	675	679	591	832	2	1027
PVP01_1407700	675	NA	584	859	3	1170
PVP01_1245300	676	NA	NA	902	4	1746
PVP01_0103400	677	NA	528	809	3	1521
PVP01_0710000	677	NA	NA	903	5	2559
PVP01_1130400	677	NA	NA	903	3	1392
PVP01_1257800	677	604	441	684	8	3672
PVP01_0947900	678	658	NA	848	4	1799
PVP01_0928800	679	NA	NA	905	5	2597
PVP01_1335700	679	613	556	754	4	1785
PVP01_0820200	680	NA	NA	906	2	779
PVP01_1426000	680	657	NA	849	2	1041
PVP01_0412600	681	NA	NA	907	3	1309
PVP01_0713100	681	NA	NA	907	2	569
PVP01_0413200	682	NA	NA	908	3	1616
PVP01_1202800	682	NA	NA	908	3	1466
PVP01_1338100	682	NA	547	829	5	2243
PVP01_0818600	683	NA	NA	909	4	1754
PVP01_1344600	683	573	482	694	4	1919
PVP01_1461500	683	681	596	846	2	774
PVP01_1239200	684	628	NA	827	2	729
PVP01_1021100	685	NA	NA	911	5	2470
PVP01_1220800	685	NA	585	867	4	1658
PVP01_0116000	686	NA	NA	913	4	2129
PVP01_1403600	687	684	599	863	2	960
PVP01_1121200	688	644	NA	843	8	3855
PVP01_1267000	688	NA	NA	915	3	1141
PVP01_1301400	688	649	576	804	2	966
PVP01_1259200	689	NA	480	779	8	3720
PVP01_1468100	689	NA	NA	916	4	2072
PVP01_0409100	690	NA	NA	917	4	1656
PVP01_0519000	690	NA	NA	917	4	1720
PVP01_0710300	691	676	NA	875	4	1811
PVP01_0726300	691	632	NA	834	6	2949
PVP01_0407300	692	NA	NA	919	3	1204
PVP01_0514800	692	NA	NA	919	2	710
PVP01_0526100	692	647	583	814	6	2785
PVP01_1303400	693	NA	NA	920	3	1530
PVP01_0935100	694	NA	584	875	4	1775
PVP01_1344300	694	NA	NA	921	3	1320
PVP01_1109600	695	647	NA	854	2	961
PVP01_0936900	696	NA	575	866	6	2668
PVP01_0929600	697	NA	NA	923	6	2929
PVP01_1242600	697	NA	NA	923	2	804
PVP01_0302600	698	674	NA	881	4	1825
PVP01_MIT03300	698	NA	523	822	6	3019
PVP01_0923700	699	618	571	780	3	1573
PVP01_0214200	700	NA	559	855	6	2977
PVP01_1455200	700	NA	NA	926	3	1469
PVP01_1123000	701	NA	592	892	6	2859
PVP01_0618700	702	NA	NA	927	3	1423
PVP01_0303100	703	NA	NA	928	4	1740
PVP01_1107200	704	NA	NA	929	2	686
PVP01_1124700	704	687	550	830	4	1894
PVP01_1404700	704	665	579	832	7	3366
PVP01_1456500	705	NA	NA	930	5	2522
PVP01_0420500	706	NA	NA	931	8	3696
PVP01_1257400	706	NA	NA	931	3	1652
PVP01_1270300	706	674	544	811	7	3178
PVP01_1343200	706	NA	NA	931	3	1457
PVP01_1431900	706	NA	NA	931	NA	NA
PVP01_0612900	707	NA	NA	932	3	1250
PVP01_0915900	707	NA	NA	932	2	707
PVP01_0829200	708	NA	NA	933	3	1294
PVP01_1131900	708	548	NA	775	4	1833
PVP01_1234700	708	NA	NA	933	2	945
PVP01_1409400	708	NA	NA	933	5	2540
PVP01_1410300	708	NA	NA	933	3	1509
PVP01_1207900	709	NA	NA	934	4	1834
PVP01_1237000	709	NA	577	882	2	1013
PVP01_1418200	709	NA	NA	934	3	1156
PVP01_1431600	709	653	583	831	2	796
PVP01_1326400	710	635	NA	854	5	2247
PVP01_0918900	711	NA	570	875	6	2918
PVP01_0607600	712	679	NA	902	2	1054
PVP01_0722500	712	NA	NA	939	6	2717
PVP01_0912900	712	NA	NA	939	5	2207
PVP01_0923500	712	NA	NA	939	5	2494
PVP01_1333600	712	NA	581	893	3	1553
PVP01_1408900	713	NA	NA	940	4	1818
PVP01_0106800	714	NA	NA	941	8	3748
PVP01_0210900	715	NA	NA	942	2	941
PVP01_1012300	715	653	491	766	3	1614
PVP01_1210500	716	670	585	856	7	3418
PVP01_1223100	716	NA	NA	943	3	1397
PVP01_1462100	717	NA	NA	944	4	1816
PVP01_1125900	718	NA	NA	945	3	1323
PVP01_1236900	719	NA	608	946	3	1512
PVP01_1340400	719	NA	NA	946	2	575
PVP01_1413700	719	681	NA	914	6	2764
PVP01_0113300	720	NA	NA	947	5	2519
PVP01_1112400	721	628	NA	860	8	3680
PVP01_1218300	721	NA	NA	948	2	1070
PVP01_0808300	722	NA	569	887	1	267
PVP01_0928300	722	NA	NA	949	3	1215
PVP01_1142900	722	665	575	843	2	803
PVP01_0209600	723	NA	567	886	3	1611
PVP01_0413400	724	NA	NA	952	NA	NA
PVP01_1018300	724	NA	NA	952	4	1792
PVP01_1452100	724	NA	NA	952	4	1831
PVP01_0927700	725	672	NA	907	4	2095
PVP01_1032600	725	NA	598	925	2	1105
PVP01_1436900	725	NA	564	884	4	2022
PVP01_0305500	726	NA	NA	955	2	880
PVP01_1307300	726	689	582	890	8	3802
PVP01_0705700	727	NA	NA	956	5	2571
PVP01_1015600	728	NA	541	869	2	1098
PVP01_1112000	729	NA	NA	961	4	2067
PVP01_1268600	729	NA	NA	961	4	2048
PVP01_0945900	730	NA	NA	963	5	2439
PVP01_0905500	731	NA	NA	965	8	3824
PVP01_1030200	731	NA	NA	965	2	913
PVP01_0520400	732	NA	NA	966	5	2391
PVP01_1237300	732	NA	NA	966	4	1662
PVP01_0622400	733	NA	NA	968	6	2853
PVP01_1338300	733	NA	NA	968	3	1122
PVP01_0531500	734	NA	543	881	5	2383
PVP01_0406500	735	NA	NA	971	2	1046
PVP01_1410400	735	NA	NA	971	4	1935
PVP01_0601600	736	NA	NA	972	5	2427
PVP01_1244000	736	NA	583	925	3	1171
PVP01_1339400	736	NA	586	927	4	2071
PVP01_0104700	737	NA	NA	973	8	3691
PVP01_0817200	737	NA	NA	973	7	3125
PVP01_1316700	738	NA	NA	974	4	1921
PVP01_1248900	739	NA	NA	975	3	1451
PVP01_1301700	739	NA	NA	975	5	2586
PVP01_0940900	740	694	NA	965	4	1750
PVP01_1140800	741	NA	NA	977	9	4052
PVP01_0108600	742	NA	NA	979	6	2657
PVP01_0616100	742	671	558	858	2	936
PVP01_1203700	742	NA	NA	979	9	3928
PVP01_1469500	743	NA	NA	981	8	3764
PVP01_1208800	744	NA	NA	983	5	2421
PVP01_0000030	745	NA	NA	984	10	4184
PVP01_1218900	745	NA	606	971	6	3048
PVP01_1401300	745	NA	NA	984	7	3145
PVP01_1247900	746	NA	NA	985	2	1016
PVP01_1340300	747	NA	NA	989	8	3607
PVP01_1234800	748	NA	NA	993	1	414
PVP01_0528600	748	NA	512	880	1	527
PVP01_1124300	748	NA	557	925	3	1614
PVP01_0509600	748	NA	NA	993	3	1597
PVP01_0416800	748	NA	NA	993	3	1311
PVP01_0608100	748	555	NA	836	3	1159
PVP01_0115000	748	NA	NA	993	5	2510
PVP01_0836600	748	NA	NA	993	4	2051
PVP01_0831500	748	NA	NA	993	2	1057
PVP01_0914000	NA	225	329	433	2	968
PVP01_1450700	NA	343	NA	670	2	715
PVP01_1205800	NA	346	449	591	2	813
PVP01_0806800	NA	358	447	599	9	4034
PVP01_0613800	NA	362	276	497	3	1607
PVP01_1463300	NA	401	384	601	7	3201
PVP01_1205100	NA	403	393	608	2	769
PVP01_1258800	NA	406	NA	717	1	246
PVP01_1450800	NA	407	NA	718	2	1035
PVP01_1261100	NA	409	NA	719	1	161
PVP01_1010400	NA	412	NA	722	8	3861
PVP01_1324200	NA	432	NA	732	NA	NA
PVP01_0320200	NA	434	NA	733	5	2529
PVP01_1329600	NA	438	NA	737	2	643
PVP01_1420800	NA	464	421	653	3	1230
PVP01_1303100	NA	466	464	671	1	511
PVP01_0917400	NA	470	421	656	1	376
PVP01_1242000	NA	471	NA	764	9	4010
PVP01_0312900	NA	476	NA	767	1	479
PVP01_1451900	NA	479	NA	769	2	593
PVP01_API02800	NA	482	442	667	10	4187
PVP01_1453300	NA	488	NA	774	3	1430
PVP01_1238600	NA	490	504	707	1	403
PVP01_1144700	NA	496	NA	782	7	3196
PVP01_0706000	NA	501	NA	787	2	823
PVP01_1133700	NA	514	357	646	2	1110
PVP01_0317900	NA	517	NA	800	2	1018
PVP01_0925200	NA	520	463	699	3	1331
PVP01_0807400	NA	522	NA	805	1	215
PVP01_1412800	NA	525	NA	807	1	430
PVP01_1234300	NA	528	NA	809	2	599
PVP01_0726100	NA	530	456	700	1	332
PVP01_1202500	NA	530	506	729	3	1450
PVP01_0832800	NA	534	NA	817	3	1272
PVP01_1424300	NA	535	561	765	2	701
PVP01_1105800	NA	540	NA	822	2	858
PVP01_0307300	NA	547	NA	828	4	1906
PVP01_0405400	NA	547	NA	828	1	192
PVP01_0118000	NA	549	NA	831	4	1815
PVP01_1131700	NA	549	NA	831	2	1022
PVP01_0725800	NA	551	NA	833	3	1264
PVP01_1258700	NA	553	573	789	6	2768
PVP01_0117000	NA	557	NA	839	2	1069
PVP01_0916450	NA	557	NA	839	NA	NA
PVP01_1458800	NA	557	NA	839	2	639
PVP01_1259800	NA	563	497	743	1	313
PVP01_0803100	NA	568	511	755	2	980
PVP01_0922100	NA	570	NA	849	6	2726
PVP01_1320800	NA	571	NA	850	3	1248
PVP01_1343100	NA	571	NA	850	4	1859
PVP01_1226100	NA	572	NA	851	3	1276
PVP01_0314700	NA	573	NA	852	2	821
PVP01_1309400	NA	574	536	774	7	3127
PVP01_0926200	NA	575	549	786	6	2826
PVP01_1465300	NA	575	NA	854	2	615
PVP01_0607500	NA	581	398	699	1	151
PVP01_0933700	NA	584	NA	863	5	2381
PVP01_0913600	NA	590	508	768	2	823
PVP01_1464500	NA	591	560	807	4	2096
PVP01_0529000	NA	593	NA	871	2	850
PVP01_0302900	NA	595	NA	874	6	2940
PVP01_0420800	NA	596	484	756	6	2843
PVP01_1458100	NA	598	NA	877	2	743
PVP01_1119700	NA	599	NA	878	2	742
PVP01_1331400	NA	599	NA	878	3	1604
PVP01_0835400	NA	600	NA	879	3	1292
PVP01_0310100	NA	602	NA	882	3	1242
PVP01_0615200	NA	603	563	820	2	971
PVP01_1132400	NA	609	NA	889	4	1992
PVP01_1316500	NA	610	514	788	7	3485
PVP01_0837800	NA	611	500	776	4	1698
PVP01_1418100	NA	611	NA	891	7	3191
PVP01_0320300	NA	612	NA	892	2	895
PVP01_0532000	NA	612	557	823	3	1333
PVP01_1419600	NA	613	517	792	2	1109
PVP01_1118900	NA	614	NA	896	2	597
PVP01_1230900	NA	615	NA	898	2	866
PVP01_0118100	NA	616	560	830	4	1937
PVP01_0603700	NA	617	525	803	3	1581
PVP01_0944100	NA	617	537	816	3	1212
PVP01_1212600	NA	617	NA	899	4	1832
PVP01_0119500	NA	620	NA	901	6	3040
PVP01_0622100	NA	620	NA	901	3	1177
PVP01_1421300	NA	622	NA	903	3	1568
PVP01_1005400	NA	623	NA	904	3	1124
PVP01_1007600	NA	623	NA	904	4	1957
PVP01_1136100	NA	623	NA	904	4	2028
PVP01_0420600	NA	624	NA	906	2	621
PVP01_0919800	NA	624	NA	906	2	812
PVP01_0511400	NA	626	NA	908	5	2578
PVP01_0709200	NA	627	580	863	7	3104
PVP01_1246200	NA	627	502	793	5	2195
PVP01_0614600	NA	629	NA	911	6	2969
PVP01_1233400	NA	630	NA	912	2	721
PVP01_0817500	NA	631	NA	913	3	1517
PVP01_1208600	NA	631	564	845	7	3285
PVP01_1442500	NA	631	559	842	1	432
PVP01_0507600	NA	632	NA	914	2	613
PVP01_1257500	NA	633	497	793	7	3173
PVP01_1132800	NA	636	NA	918	2	998
PVP01_0114200	NA	637	NA	919	4	1767
PVP01_0914100	NA	638	NA	920	4	1967
PVP01_1265900	NA	640	595	889	2	608
PVP01_1345200	NA	640	NA	922	7	3228
PVP01_0615900	NA	642	589	886	2	629
PVP01_1119000	NA	642	NA	924	5	2525
PVP01_1325900	NA	646	NA	929	5	2479
PVP01_1249100	NA	647	NA	931	4	1954
PVP01_0905900	NA	648	550	853	2	808
PVP01_1264700	NA	649	NA	933	2	738
PVP01_1221300	NA	650	NA	935	3	1259
PVP01_1340800	NA	650	NA	935	8	3814
PVP01_0603300	NA	651	NA	936	2	1116
PVP01_0109100	NA	652	NA	937	2	570
PVP01_1442700	NA	652	NA	937	4	2090
PVP01_0104800	NA	656	NA	940	4	1668
PVP01_0606100	NA	656	575	885	2	626
PVP01_0520700	NA	659	NA	942	4	1969
PVP01_1023800	NA	659	NA	942	5	2489
PVP01_0109400	NA	660	596	912	3	1138
PVP01_0208000	NA	661	NA	944	7	3428
PVP01_0909500	NA	662	NA	945	2	973
PVP01_1462900	NA	664	NA	947	4	2034
PVP01_1259100	NA	665	NA	948	6	2738
PVP01_1109300	NA	666	NA	950	2	949
PVP01_0207400	NA	667	597	921	4	1798
PVP01_1454000	NA	667	NA	951	6	2887
PVP01_0314900	NA	668	NA	952	4	1981
PVP01_1203800	NA	668	NA	952	4	2153
PVP01_1235700	NA	669	NA	953	5	2288
PVP01_1255700	NA	669	NA	953	3	1123
PVP01_1016600	NA	670	NA	954	3	1227
PVP01_0919100	NA	671	NA	955	2	838
PVP01_0610200	NA	672	NA	956	3	1477
PVP01_0119200	NA	673	NA	957	6	2767
PVP01_0947800	NA	673	NA	957	6	2766
PVP01_0422100	NA	674	NA	958	6	3088
PVP01_0603200	NA	674	NA	958	3	1431
PVP01_1426900	NA	674	NA	958	6	2750
PVP01_0818300	NA	675	NA	959	3	1515
PVP01_1444000	NA	677	NA	961	6	2747
PVP01_0809900	NA	678	600	937	6	2841
PVP01_1403400	NA	678	NA	962	4	1928
PVP01_1107700	NA	679	NA	964	3	1575
PVP01_0833700	NA	680	NA	965	3	1280
PVP01_1239100	NA	680	581	918	5	2576
PVP01_1335600	NA	681	NA	969	4	1845
PVP01_0304700	NA	682	602	951	8	3625
PVP01_0321100	NA	682	NA	973	7	3290
PVP01_1264400	NA	683	NA	974	4	1882
PVP01_0411300	NA	684	NA	975	4	2102
PVP01_0939700	NA	685	NA	976	6	3063
PVP01_1124600	NA	685	594	940	8	3830
PVP01_1426300	NA	686	605	964	3	1490
PVP01_1460800	NA	686	NA	979	4	2142
PVP01_0413500	NA	688	NA	980	5	2632
PVP01_0106200	NA	689	NA	984	3	1467
PVP01_0616600	NA	690	NA	985	3	1595
PVP01_0410200	NA	691	NA	987	9	3872
PVP01_0815800	NA	692	NA	988	8	3676
PVP01_0525900	NA	693	NA	990	7	3239
PVP01_0119400	NA	694	NA	991	7	3231
PVP01_1301600	NA	694	NA	991	7	3412
PVP01_1449400	NA	695	NA	992	8	3553
PVP01_0214800	NA	696	NA	993	7	3446
PVP01_1437300	NA	NA	423	801	7	3228
PVP01_1220300	NA	NA	448	819	3	1651
PVP01_1224700	NA	NA	450	821	4	2056
PVP01_1433500	NA	NA	453	824	1	304
PVP01_1309500	NA	NA	455	826	3	1242
PVP01_1449300	NA	NA	459	829	3	1497
PVP01_0113700	NA	NA	466	837	3	1409
PVP01_0313100	NA	NA	473	843	1	455
PVP01_0528700	NA	NA	474	844	5	2422
PVP01_0807100	NA	NA	475	845	1	483
PVP01_0813400	NA	NA	493	864	7	3094
PVP01_1115600	NA	NA	497	865	4	1655
PVP01_0206100	NA	NA	502	870	3	1385
PVP01_1305200	NA	NA	505	872	2	590
PVP01_1114800	NA	NA	506	873	4	2075
PVP01_1114800	NA	NA	506	873	4	2075
PVP01_1114800	NA	NA	506	873	4	2075
PVP01_1114800	NA	NA	506	873	4	2075
PVP01_1114800	NA	NA	506	873	4	2075
PVP01_1114800	NA	NA	506	873	4	2075
PVP01_1114800	NA	NA	506	873	4	2075
PVP01_1114800	NA	NA	506	873	4	2075
PVP01_1223200	NA	NA	507	874	3	1479
PVP01_1256000	NA	NA	511	879	2	1066
PVP01_1442300	NA	NA	515	883	7	3229
PVP01_0411200	NA	NA	516	884	2	648
PVP01_1331200	NA	NA	519	887	2	667
PVP01_1313200	NA	NA	530	900	3	1445
PVP01_1346400	NA	NA	532	902	2	580
PVP01_1429600	NA	NA	535	904	9	3880
PVP01_0938700	NA	NA	537	907	8	3542
PVP01_1311200	NA	NA	537	907	2	938
PVP01_1333200	NA	NA	539	909	3	1578
PVP01_1438100	NA	NA	540	910	4	2127
PVP01_0406200	NA	NA	542	912	3	1296
PVP01_1443100	NA	NA	544	914	1	513
PVP01_0831100	NA	NA	545	915	4	1676
PVP01_1331900	NA	NA	546	916	3	1478
PVP01_0815200	NA	NA	550	920	2	609
PVP01_0832000	NA	NA	551	921	2	772
PVP01_0406300	NA	NA	555	923	2	829
PVP01_0808200	NA	NA	557	925	1	409
PVP01_1251100	NA	NA	557	925	7	3224
PVP01_1309100	NA	NA	557	925	6	2919
PVP01_0414900	NA	NA	563	930	2	802
PVP01_1008900	NA	NA	563	930	6	2732
PVP01_1239700	NA	NA	564	931	3	1546
PVP01_1300600	NA	NA	564	931	1	25
PVP01_1439200	NA	NA	564	931	7	3336
PVP01_1023000	NA	NA	565	934	2	611
PVP01_0318600	NA	NA	567	936	2	840
PVP01_1145800	NA	NA	567	936	2	1024
PVP01_0103300	NA	NA	568	937	3	1300
PVP01_0110300	NA	NA	569	938	4	1728
PVP01_1238100	NA	NA	569	938	2	592
PVP01_1260200	NA	NA	571	940	4	1869
PVP01_0935300	NA	NA	573	942	3	1413
PVP01_1009500	NA	NA	573	942	2	1026
PVP01_1251700	NA	NA	573	942	3	1241
PVP01_0422600	NA	NA	574	943	3	1395
PVP01_0721100	NA	NA	574	943	2	793
PVP01_1139900	NA	NA	582	955	3	1419
PVP01_0206200	NA	NA	584	957	2	788
PVP01_0511300	NA	NA	585	958	6	2891
PVP01_0808500	NA	NA	585	958	1	356
PVP01_0510900	NA	NA	586	959	4	1915
PVP01_0944700	NA	NA	587	960	3	1362
PVP01_0307400	NA	NA	589	963	6	2765
PVP01_1302800	NA	NA	589	963	6	2972
PVP01_1420400	NA	NA	590	964	9	3923
PVP01_0609000	NA	NA	591	965	6	2896
PVP01_0909900	NA	NA	593	967	5	2315
PVP01_1224000	NA	NA	593	967	3	1600
PVP01_1264300	NA	NA	593	967	6	3086
PVP01_1307500	NA	NA	593	967	8	3812
PVP01_1006500	NA	NA	594	968	2	1101
PVP01_0616200	NA	NA	596	970	6	3038
PVP01_1244400	NA	NA	600	978	7	3473
PVP01_1334600	NA	NA	600	978	2	962
PVP01_1426400	NA	NA	600	978	3	1169
PVP01_0522400	NA	NA	601	980	2	1058
PVP01_0714300	NA	NA	601	980	5	2580
PVP01_0805900	NA	NA	602	982	8	3710
PVP01_1223400	NA	NA	602	982	3	1201
PVP01_1005700	NA	NA	603	983	2	979
PVP01_1334200	NA	NA	604	986	5	2228
PVP01_1033200	NA	NA	607	992	8	3528
PVP01_0712600	NA	NA	608	993	6	3051
PVP01_0604300	NA	NA	608	993	3	1453
PVP01_1306900	NA	NA	608	993	3	1482
PVP01_1311500	NA	NA	608	993	4	2117
