# Supplementary material for: Single-cell RNA sequencing of Plasmodium vivax sporozoites reveals stage- and species-specific transcriptomic signatures
Source: PLoS Negl Trop Dis. 2022 Aug 4;16(8):e0010633. doi: 10.1371/journal.pntd.0010633 (PMC9380936; doi:10.1371/journal.pntd.0010633)
Supplement: S6 Table — (XLSX) [file pntd.0010633.s006.xlsx]

## Sheet: Sheet1
Supplementary Table S6. Marker genes in P. vivax sporozoites across clusters.
marker of cluster	gene_id	gene_description	average log2 fold-change	Proportion of spz in cluster with gene detected	Proportion of spz in other clusters with gene detected	p value	adjusted p value
C1	PVP01_0304200	sporozoite-specific protein S10, putative	5.73836	0.802	0.019	0	0
C1	PVP01_1012300	conserved Plasmodium protein, unknown function	5.62615	0.744	0.011	0	0
C1	PVP01_1124700	conserved Plasmodium protein, unknown function	4.69931	0.5	0.009	0	0
C1	PVP01_1270300	cysteine repeat modular protein 4, putative	4.28029	0.535	0.012	0	0
C1	PVP01_1307300	cysteine repeat modular protein 3, putative	3.98865	0.36	0.006	2.94e-253	4.08e-250
C1	PVP01_1436900	conserved Plasmodium protein, unknown function	4.01354	0.36	0.007	3.36e-226	4.66e-223
C1	PVP01_1117100	conserved Plasmodium protein, unknown function	4.58035	0.64	0.031	1.12e-205	1.55e-202
C1	PVP01_0948400	membrane associated erythrocyte binding-like protein, putative	4.20272	0.558	0.025	5.54e-186	7.69e-183
C1	PVP01_0421700	conserved Plasmodium protein, unknown function	3.6664	0.581	0.051	6.99e-104	9.7e-101
C1	PVP01_0918800	heat shock protein 90, putative	2.82185	0.337	0.036	1.77e-46	2.45e-43
C1	PVP01_0108700	heat shock protein 90, putative	2.22472	0.767	0.201	1.58e-42	2.19e-39
C1	PVP01_1206200	conserved Plasmodium protein, unknown function	2.53537	0.523	0.095	3.13e-41	4.34e-38
C1	PVP01_0809500	metalloprotease, putative	2.29977	0.442	0.078	6.7e-35	9.29e-32
C1	PVP01_1463200	actin, putative	1.66524	0.895	0.414	1.73e-29	2.4e-26
C1	PVP01_1129300	conserved Plasmodium protein, unknown function	1.88313	0.674	0.215	6.83e-27	9.48e-24
C1	PVP01_0908800	IWS1-like protein, putative	2.17342	0.465	0.118	2.47e-24	3.42e-21
C1	PVP01_1340900	plasmepsin IV, putative	1.92758	0.419	0.094	1.3e-23	1.8e-20
C1	PVP01_0723600	conserved Plasmodium protein, unknown function	1.72929	0.779	0.334	3.45e-23	4.79e-20
C1	PVP01_1213900	sodium-dependent phosphate transporter, putative	1.62004	0.837	0.436	3.75e-23	5.2e-20
C1	PVP01_1429400	conserved Plasmodium protein, unknown function	2.00199	0.407	0.095	1.03e-22	1.43e-19
C1	PVP01_0933800	conserved Plasmodium protein, unknown function	1.97245	0.733	0.31	5.34e-22	7.4e-19
C1	PVP01_0517200	zinc finger protein, putative	1.58792	0.721	0.283	3.23e-20	4.48e-17
C1	PVP01_0922200	exported protein 1, putative	1.87831	0.43	0.112	3.71e-20	5.14e-17
C1	PVP01_0303800	6-cysteine protein P52, putative	1.79223	0.581	0.197	2.6e-19	3.6e-16
C1	PVP01_1464000	rac-beta serine/threonine protein kinase, putative	1.78411	0.581	0.206	3.88e-19	5.38e-16
C1	PVP01_1307900	zinc finger protein, putative	1.64991	0.523	0.161	5.47e-19	7.59e-16
C1	PVP01_1265400	acid cluster protein 33 homologue, putative	1.3602	0.488	0.141	1.07e-18	1.48e-15
C1	PVP01_0819700	nicotinamidase, putative	1.79575	0.302	0.064	2.27e-18	3.15e-15
C1	PVP01_0908100	polyadenylate-binding protein-interacting protein 1, putative	1.66052	0.651	0.262	7.08e-18	9.82e-15
C1	PVP01_0412300	secreted protein with altered thrombospondin repeat domain, putative	1.18069	0.907	0.721	3.86e-17	5.35e-14
C1	PVP01_0712200	conserved Plasmodium protein, unknown function	1.58831	0.616	0.256	2.51e-16	3.48e-13
C1	PVP01_0713400	type II NADH:ubiquinone oxidoreductase, putative	1.88545	0.384	0.111	1.28e-15	1.77e-12
C1	PVP01_1314200	glutamate synthase [NADH], putative	1.32285	0.709	0.346	1.99e-15	2.76e-12
C1	PVP01_0718000	dolichyl-diphosphooligosaccharide--protein glycosyltransferase subunit WBP1, putative	1.16168	0.674	0.283	7.15e-15	9.92e-12
C1	PVP01_0837700	serine/threonine protein kinase, putative	1.39649	0.477	0.163	4.55e-14	6.32e-11
C1	PVP01_1332400	NADP-specific glutamate dehydrogenase, putative	1.33677	0.535	0.211	9.67e-14	1.34e-10
C1	PVP01_1032700	conserved Plasmodium protein, unknown function	1.15607	0.686	0.328	1.53e-13	2.12e-10
C1	PVP01_0405600	ribosome associated membrane protein RAMP4, putative	1.15728	0.43	0.147	1.56e-12	2.16e-09
C1	PVP01_0733300	conserved Plasmodium protein, unknown function	1.02398	0.326	0.094	7.31e-12	1.01e-08
C1	PVP01_0112100	ubiquitin regulatory protein, putative	1.3809	0.512	0.232	1.58e-10	2.19e-07
C1	PVP01_0305100	lysine decarboxylase, putative	1.12418	0.64	0.339	2.96e-10	4.1e-07
C1	PVP01_0210700	thrombospondin-related sporozoite protein, putative	0.874609	0.767	0.498	5.04e-10	6.99e-07
C1	PVP01_0917300	dipeptidyl aminopeptidase 1, putative	1.22889	0.5	0.216	5.69e-10	7.89e-07
C1	PVP01_0114800	serine/threonine protein kinase, FIKK family	0.957679	0.488	0.215	2.46e-09	3.41e-06
C1	PVP01_0723900	protein phosphatase-beta, putative	0.952785	0.686	0.381	3.73e-09	5.17e-06
C1	PVP01_0611700	conserved Plasmodium protein, unknown function	0.631217	0.942	0.768	3.76e-09	5.22e-06
C1	PVP01_1419200	conserved Plasmodium protein, unknown function	1.23829	0.326	0.121	1.17e-08	1.62e-05
C1	PVP01_0418000	serine-repeat antigen (SERA)	1.32714	0.419	0.184	1.27e-08	1.76e-05
C1	PVP01_0113600	V-type proton ATPase subunit a, putative	1.0005	0.581	0.319	1.96e-08	2.73e-05
C1	PVP01_1315100	conserved protein, unknown function	0.704782	0.872	0.705	1.97e-08	2.73e-05
C1	PVP01_1325400	calcium-dependent protein kinase, putative	1.08338	0.43	0.198	2.24e-08	3.1e-05
C1	PVP01_1306500	conserved Plasmodium protein, unknown function	1.09554	0.57	0.324	2.25e-08	3.13e-05
C1	PVP01_1460700	translation initiation factor SUI1, putative	0.611797	0.977	0.787	2.45e-08	3.4e-05
C1	PVP01_1117400	V-type proton ATPase 21 kDa proteolipid subunit, putative	0.904255	0.628	0.339	5.49e-08	7.62e-05
C1	PVP01_1425500	superoxide dismutase [Fe], putative	1.07578	0.523	0.27	6.37e-08	8.84e-05
C1	PVP01_0926700	threonine--tRNA ligase, putative	0.777536	0.5	0.233	6.41e-08	8.89e-05
C1	PVP01_1122200	E3 ubiquitin-protein ligase RNF5, putative	1.23071	0.337	0.135	7.02e-08	9.73e-05
C1	PVP01_0204500	phosphatidylinositol-4-phosphate 5-kinase, putative	1.03449	0.349	0.138	7.46e-08	0.000103
C1	PVP01_1427900	sporozoite surface protein 3, putative	1.41788	0.419	0.205	9.51e-08	0.000132
C1	PVP01_0528300	conserved protein, unknown function	0.9883	0.57	0.296	1.54e-07	0.000213
C1	PVP01_0607700	citrate synthase, mitochondrial, putative	1.02862	0.314	0.121	1.72e-07	0.000238
C1	PVP01_1014200	FoP domain-containing protein, putative	0.653428	0.802	0.536	2e-07	0.000277
C1	PVP01_1224800	apicoplast calcium binding protein 1, putative	1.21036	0.407	0.196	3.93e-07	0.000545
C1	PVP01_1242100	vacuolar ATP synthase subunit d, putative	0.808716	0.674	0.444	5.9e-07	0.000818
C1	PVP01_1014800	50S ribosomal protein L14, mitochondrial, putative	1.0399	0.302	0.122	8.05e-07	0.00111711
C1	PVP01_1233600	DnaJ protein, putative	0.937204	0.477	0.241	8.49e-07	0.00117703
C1	PVP01_1143800	RNA-binding protein, putative	1.03206	0.384	0.179	1.01e-06	0.00139463
C1	PVP01_0112200	plasmepsin X, putative	0.682205	0.674	0.383	1.03e-06	0.00142672
C1	PVP01_1260100	glutaminyl-peptide cyclotransferase, putative	0.842106	0.453	0.242	1.39e-06	0.00192352
C1	PVP01_0920800	conserved Plasmodium protein, unknown function	0.888754	0.407	0.206	8.34e-06	0.0115671
C1	PVP01_0710400	inhibitor of cysteine proteases, putative	0.569104	0.907	0.727	1.29e-05	0.0178682
C1	PVP01_1334800	zinc finger protein, putative	0.637559	0.523	0.289	1.54e-05	0.0213211
C1	PVP01_1411700	RNA-binding protein, putative	0.600779	0.791	0.556	1.62e-05	0.0224458
C1	PVP01_1465600	bax inhibitor 1, putative	0.754203	0.36	0.173	1.84e-05	0.0254596
C1	PVP01_1026000	6-cysteine protein	0.880878	0.302	0.137	1.86e-05	0.0257984
C1	PVP01_0715100	RNA-binding protein musashi, putative	0.753975	0.512	0.287	1.92e-05	0.0266649
C1	PVP01_0823000	6-cysteine protein	0.699281	0.36	0.173	3.37e-05	0.0467604
C2	PVP01_0835600	circumsporozoite (CS) protein	2.56264	0.986	0.444	0	0
C2	PVP01_0602100	early transcribed membrane protein	2.47478	0.666	0.09	0	0
C2	PVP01_1132600	TRAP-like protein, putative	2.08819	0.644	0.114	0	0
C2	PVP01_0938800	sporozoite surface protein essential for liver stage development, putative	1.94217	0.837	0.239	0	0
C2	PVP01_0710400	inhibitor of cysteine proteases, putative	1.74088	0.919	0.28	0	0
C2	PVP01_1131600	histone H3 variant, putative	1.52904	0.8	0.216	0	0
C2	PVP01_0611800	conserved Plasmodium protein, unknown function	1.49494	0.601	0.129	1.32e-297	1.83e-294
C2	PVP01_0923400	calcium-dependent protein kinase 6, putative	1.38565	0.673	0.184	9.33e-295	1.29e-291
C2	PVP01_1242200	serine/threonine protein phosphatase UIS2, putative	1.39636	0.632	0.155	1.34e-290	1.86e-287
C2	PVP01_0927000	DnaJ protein, putative	2.16293	0.436	0.053	3.23e-274	4.48e-271
C2	PVP01_1427300	protein KIC7, putative	1.36029	0.575	0.137	2.14e-260	2.96e-257
C2	PVP01_1022600	conserved Plasmodium protein, unknown function	1.0011	0.853	0.356	1.11e-259	1.54e-256
C2	PVP01_0614100	conserved Plasmodium protein, unknown function	1.29614	0.54	0.122	2.1e-242	2.92e-239
C2	PVP01_0934200	apical membrane antigen 1	1.12753	0.641	0.185	5.22e-240	7.23e-237
C2	PVP01_0303900	6-cysteine protein, putative, pseudogene	1.22448	0.552	0.134	1.33e-234	1.84e-231
C2	PVP01_0530300	conserved Plasmodium protein, unknown function	2.00035	0.363	0.045	7.83e-214	1.09e-210
C2	PVP01_0305100	lysine decarboxylase, putative	1.44731	0.448	0.091	2.09e-212	2.9e-209
C2	PVP01_1306500	conserved Plasmodium protein, unknown function	1.44485	0.43	0.08	4.97e-212	6.89e-209
C2	PVP01_1235600	sulfate transporter, putative	1.78886	0.366	0.049	2.09e-207	2.9e-204
C2	PVP01_1403100	protein UIS3, putative	2.01512	0.338	0.037	2.03e-204	2.81e-201
C2	PVP01_0319000	conserved protein, unknown function	1.03459	0.62	0.21	2.23e-196	3.09e-193
C2	PVP01_1413800	eukaryotic translation initation factor 4 gamma, putative	1.47258	0.408	0.079	7.27e-195	1.01e-191
C2	PVP01_0723900	protein phosphatase-beta, putative	1.01206	0.49	0.133	1.09e-177	1.52e-174
C2	PVP01_1405700	NLI interacting factor-like phosphatase, putative	1.08127	0.486	0.134	4.46e-176	6.19e-173
C2	PVP01_1144400	GYF domain-containing protein, putative	0.962041	0.498	0.14	4.75e-176	6.58e-173
C2	PVP01_1404300	LisH domain-containing protein, putative	1.72016	0.327	0.048	1.65e-175	2.29e-172
C2	PVP01_0715100	RNA-binding protein musashi, putative	1.33796	0.379	0.077	1.19e-174	1.65e-171
C2	PVP01_1308600	cGMP-specific 3',5'-cyclic phosphodiesterase alpha, putative	0.84081	0.524	0.159	2.65e-167	3.68e-164
C2	PVP01_1213900	sodium-dependent phosphate transporter, putative	0.829251	0.551	0.176	4.73e-166	6.56e-163
C2	PVP01_0925500	conserved Plasmodium protein, unknown function	1.85658	0.308	0.046	4.32e-165	5.99e-162
C2	PVP01_1111200	falcilysin, putative	0.761891	0.676	0.259	1.19e-164	1.65e-161
C2	PVP01_0527700	conserved Plasmodium protein, unknown function	1.34312	0.366	0.08	5.74e-159	7.96e-156
C2	PVP01_0113600	V-type proton ATPase subunit a, putative	0.93685	0.411	0.108	2.03e-147	2.81e-144
C2	PVP01_0911200	RNA-binding protein, putative	0.981958	0.394	0.102	1.36e-144	1.89e-141
C2	PVP01_1251200	conserved Plasmodium protein, unknown function	1.19656	0.34	0.073	2.03e-143	2.81e-140
C2	PVP01_1225100	AMP deaminase, putative	0.610661	0.717	0.309	6.42e-141	8.9e-138
C2	PVP01_0806900	rho GTPase-activating protein, putative	0.712357	0.45	0.143	1.31e-129	1.81e-126
C2	PVP01_0106700	conserved Plasmodium protein, unknown function	0.65337	0.457	0.147	2.07e-128	2.87e-125
C2	PVP01_1436200	conserved protein, unknown function	1.13602	0.306	0.068	2.94e-125	4.08e-122
C2	PVP01_1238800	conserved Plasmodium protein, unknown function	1.03321	0.359	0.1	3.88e-123	5.38e-120
C2	PVP01_0117400	serine/threonine protein phosphatase 2B catalytic subunit A, putative	0.599589	0.559	0.216	3.95e-119	5.48e-116
C2	PVP01_1210400	conserved Plasmodium protein, unknown function	0.522547	0.522	0.201	1.55e-108	2.15e-105
C2	PVP01_1232200	conserved Plasmodium protein, unknown function	0.636188	0.387	0.125	6.03e-106	8.37e-103
C2	PVP01_1423600	transcription elongation factor s-II, putative	0.679668	0.369	0.117	1.73e-105	2.4e-102
C2	PVP01_0517100	14-3-3 protein, putative	0.441021	0.548	0.224	1.37e-98	1.89e-95
C2	PVP01_1247100	bax inhibitor 1, putative	0.625935	0.332	0.104	4.15e-95	5.76e-92
C2	PVP01_0532200	conserved Plasmodium protein, unknown function	0.363009	0.574	0.246	1.12e-92	1.55e-89
C2	PVP01_1008000	inner membrane complex protein 1g, putative	0.413782	0.421	0.155	2.73e-91	3.79e-88
C2	PVP01_1310600	DnaJ domain containing protein	0.414082	0.422	0.162	7.72e-87	1.07e-83
C2	PVP01_0216000	AP2 domain transcription factor AP2-L, putative	0.548709	0.319	0.106	3.89e-83	5.39e-80
C2	PVP01_1439100	conserved Plasmodium protein, unknown function	0.4625	0.357	0.128	2.66e-81	3.68e-78
C2	PVP01_1319400	conserved protein, unknown function	0.380684	0.407	0.161	4.88e-79	6.77e-76
C2	PVP01_1463200	actin, putative	0.370453	0.502	0.219	8.65e-78	1.2e-74
C2	PVP01_0516700	BEM46-like protein, putative	0.312371	0.534	0.236	1.91e-77	2.65e-74
C2	PVP01_1425800	conserved protein, unknown function	0.441366	0.345	0.128	1.04e-75	1.44e-72
C2	PVP01_0528300	conserved protein, unknown function	0.403735	0.365	0.141	2e-75	2.77e-72
C2	PVP01_1333500	Btz domain-containing protein, putative	0.347693	0.362	0.139	3.42e-74	4.75e-71
C2	PVP01_1105900	DIP13 homolog, putative	0.340614	0.33	0.12	3.91e-74	5.42e-71
C2	PVP01_0933800	conserved Plasmodium protein, unknown function	0.305132	0.381	0.157	4.45e-68	6.17e-65
C2	PVP01_0210600	protein E140, putative	0.285031	0.337	0.131	7.81e-68	1.08e-64
C2	PVP01_0726800	conserved Plasmodium protein, unknown function	0.283433	0.363	0.151	1.75e-62	2.43e-59
C2	PVP01_0515400	heat shock protein 70, putative	0.260923	0.687	0.406	2.74e-45	3.8e-42
C3	PVP01_0835700	1-cys-glutaredoxin-like protein-1, putative	0.749632	0.669	0.792	2.67e-59	3.71e-56
C3	PVP01_0317600	V-type ATPase V0 subunit e, putative	0.839734	0.59	0.707	8.5e-48	1.18e-44
C3	PVP01_0313300	calcium-dependent protein kinase 4, putative	0.277342	0.245	0.435	2.3e-21	3.19e-18
C3	PVP01_0418900	pantothenate transporter, putative	0.369416	0.215	0.375	8.71e-18	1.21e-14
C3	PVP01_1117400	V-type proton ATPase 21 kDa proteolipid subunit, putative	0.317904	0.229	0.387	1.25e-15	1.73e-12
C3	PVP01_1432200	kelch domain-containing protein, putative	0.751248	0.488	0.6	3.08e-15	4.27e-12
C3	PVP01_1436800	thrombospondin-related apical membrane protein	0.387479	0.228	0.381	2.21e-14	3.07e-11
C3	PVP01_1411700	RNA-binding protein, putative	0.743144	0.467	0.595	3.23e-12	4.48e-09
C3	PVP01_1461800	conserved protein, unknown function	0.397094	0.265	0.423	3.86e-12	5.36e-09
C3	PVP01_0602700	myosin essential light chain ELC, putative	0.760466	0.47	0.599	6.42e-11	8.9e-08
C3	PVP01_1440500	endoplasmin, putative	0.579448	0.2	0.322	9.24e-11	1.28e-07
C3	PVP01_0802200	transformer-2 protein homolog beta, putative	0.336504	0.248	0.392	9.5e-11	1.32e-07
C3	PVP01_0729600	NifU-like protein, putative	0.45967	0.216	0.327	6.01e-08	8.33e-05
C3	PVP01_1010500	DnaJ protein, putative	0.458786	0.251	0.39	7.13e-08	9.88e-05
C3	PVP01_0712500	conserved Plasmodium protein, unknown function	0.391695	0.354	0.566	1.58e-07	0.000219
C3	PVP01_1262200	fructose 1,6-bisphosphate aldolase, putative	0.527306	0.208	0.315	3e-07	0.000416
C3	PVP01_1461700	ADP-ribosylation factor GTPase-activating protein 1, putative	0.279195	0.407	0.636	3.78e-06	0.00524421
C3	PVP01_0927900	conserved Plasmodium protein, unknown function	0.505058	0.524	0.699	4.27e-06	0.0059226
C3	PVP01_1249700	thioredoxin 1, putative	0.532994	0.499	0.681	2.54e-05	0.0352414
C3	PVP01_0305400	conserved protein, unknown function	0.547642	0.286	0.435	2.65e-05	0.0367401
