# Supplementary material for: Single-cell RNA sequencing of Plasmodium vivax sporozoites reveals stage- and species-specific transcriptomic signatures
Source: PLoS Negl Trop Dis. 2022 Aug 4;16(8):e0010633. doi: 10.1371/journal.pntd.0010633 (PMC9380936; doi:10.1371/journal.pntd.0010633)
Supplement: S7 Table — (XLSX) [file pntd.0010633.s007.xlsx]

## Sheet: Sheet1
Supplementary Table S7. Genes identified as differentially expressed across pseudotime with corresponding summary statistics.
gene info		associationTest() output					Pseudobulk count metrics
gene	description	waldStat_association	df_association	pvalue_association	meanLogFC_association	fdr_association	Rep 1 Counts	Rep 1 Gene Rank	Rep 2 Counts	Rep 2 Gene Rank	Rep 3 Counts	Rep 3 Gene Rank	Replicate mean count (when detected)	Ranking of Replicate mean	Sum of all counts across replicates	Combined Ranking
PVP01_0010840	conserved Plasmodium protein, unknown function	125.614	5	0	0.940084	0	274	553	NA	NA	146	503	210	702	420	704
PVP01_0105700	inositol-phosphate phosphatase, putative	255.659	5	0	0.735259	0	752	285	367	422	245	416	454.667	408	1364	391
PVP01_0106700	conserved Plasmodium protein, unknown function	583.56	5	0	0.426897	0	2303	75	1542	111	1162	104	1669	88	5007	88
PVP01_0107900	E3 ubiquitin-protein ligase, putative	86.6211	5	0	0.511313	0	426	441	289	477	NA	NA	357.5	499	715	584
PVP01_0108700	heat shock protein 90, putative	346.321	5	0	0.931203	0	1654	111	764	236	1262	93	1226.67	142	3680	142
PVP01_0109500	glutaredoxin-like protein	121.128	5	0	0.914115	0	368	485	NA	NA	270	396	319	542	638	620
PVP01_0109700	cloroquine resistance asscociatd protein Cg7, putative	118.137	5	0	0.72634	0	375	478	387	410	199	459	320.333	540	961	495
PVP01_0109900	ribonucleases P/MRP protein subunit POP1, putative	117.841	5	0	0.576562	0	406	456	281	484	180	473	289	583	867	527
PVP01_0110600	conserved Plasmodium protein, unknown function	661.153	5	0	0.742193	0	1196	171	778	230	731	191	901.667	194	2705	194
PVP01_0112100	ubiquitin regulatory protein, putative	190.798	5	0	0.701914	0	1110	191	944	185	984	134	1012.67	171	3038	171
PVP01_0112200	plasmepsin X, putative	236.95	5	0	0.64656	0	1965	88	1735	92	1753	58	1817.67	77	5453	77
PVP01_0113600	V-type proton ATPase subunit a, putative	823.823	5	0	0.810783	0	1876	95	1471	118	1109	113	1485.33	106	4456	106
PVP01_0114800	serine/threonine protein kinase, FIKK family	236.803	5	0	0.859913	0	1070	204	924	191	767	184	920.333	188	2761	188
PVP01_0115300	gamete release protein, putative	124.554	5	0	0.510388	0	481	405	348	437	362	335	397	452	1191	428
PVP01_0115600	GTPase-activating protein, putative	165.567	5	0	0.526544	0	985	225	714	256	571	244	756.667	248	2270	248
PVP01_0116200	zinc finger protein, putative	173.716	5	0	0.893534	0	290	542	159	583	NA	NA	224.5	681	449	691
PVP01_0117400	serine/threonine protein phosphatase 2B catalytic subunit A, putative	692.413	5	0	0.573251	0	2777	57	2533	49	2258	43	2522.67	53	7568	53
PVP01_0118300	lysine-specific histone demethylase, putative	230.117	5	0	0.712715	0	624	335	334	445	322	359	426.667	425	1280	407
PVP01_0118400	mannose-6-phosphate isomerase, putative	346.885	5	0	0.940205	0	565	363	390	408	281	387	412	440	1236	419
PVP01_0203400	eukaryotic translation initiation factor 4E, putative	224.662	5	0	1.13096	0	534	378	140	597	171	481	281.667	594	845	536
PVP01_0204300	transcription initiation factor TFIIB, putative	249.661	5	0	0.89622	0	433	437	248	511	288	381	323	534	969	491
PVP01_0204500	phosphatidylinositol-4-phosphate 5-kinase, putative	240.454	5	0	0.832423	0	713	301	527	328	481	279	573.667	317	1721	314
PVP01_0205400	rRNA biogenesis protein RRP36, putative	160.447	5	0	1.56373	0	307	530	NA	NA	NA	NA	307	557	307	758
PVP01_0205700	tubulin-specific chaperone a, putative	115.291	5	0	0.752413	0	662	320	NA	NA	303	369	482.5	377	965	493
PVP01_0206700	conserved Plasmodium protein, unknown function	533.032	5	0	0.834409	0	972	228	527	328	530	263	676.333	274	2029	274
PVP01_0207300	eukaryotic translation initiation factor 2-alpha kinase 2, putative	235.796	5	0	1.0145	0	558	366	325	453	233	428	372	481	1116	451
PVP01_0207800	centrin-1, putative	220.836	5	0	1.44737	0	406	456	NA	NA	NA	NA	406	445	406	712
PVP01_0210400	ubiquitin carboxyl-terminal hydrolase 1, putative	755.17	5	0	0.920519	0	1311	147	708	258	561	249	860	210	2580	210
PVP01_0210600	protein E140, putative	355.328	5	0	0.570928	0	1803	101	1066	167	893	156	1254	137	3762	137
PVP01_0210700	thrombospondin-related sporozoite protein, putative	477.287	5	0	0.871166	0	2118	81	3318	40	3424	18	2953.33	45	8860	45
PVP01_0212200	ubiquitin carboxyl-terminal hydrolase, putative	220.405	5	0	1.04646	0	419	445	230	525	194	461	281	596	843	538
PVP01_0214300	RING zinc finger protein, putative	197.965	5	0	1.72853	0	288	544	200	547	170	482	219.333	687	658	610
PVP01_0214400	alpha/beta hydrolase, putative	172.278	5	0	0.396761	0	1216	163	939	186	721	196	958.667	181	2876	181
PVP01_0215200	N6-adenosine-methyltransferase MT-A70, putative	424.96	5	0	0.887226	0	789	277	359	429	375	328	507.667	353	1523	344
PVP01_0216000	AP2 domain transcription factor AP2-L, putative	370.627	5	0	0.425626	0	1569	119	1146	157	785	179	1166.67	151	3500	151
PVP01_0302700	ubiquitin specific protease, putative	163.223	5	0	0.306963	0	1273	156	899	195	525	265	899	197	2697	197
PVP01_0303700	6-cysteine protein P36, putative	227.048	5	0	0.519737	0	2179	78	1692	95	1558	74	1809.67	78	5429	78
PVP01_0303800	6-cysteine protein P52, putative	475.233	5	0	1.21543	0	965	232	741	245	744	189	816.667	226	2450	226
PVP01_0303900	6-cysteine protein, putative, pseudogene	1394.26	5	0	0.683731	0	3418	40	1840	81	1615	66	2291	60	6873	60
PVP01_0304200	sporozoite-specific protein S10, putative	121.798	5	0	3.16636	0	172	632	86	642	233	428	163.667	772	491	673
PVP01_0305100	lysine decarboxylase, putative	1189.1	5	0	1.03511	0	2090	82	1455	121	1522	77	1689	87	5067	87
PVP01_0305400	conserved protein, unknown function	102.097	5	0	0.306423	0	1932	91	2084	75	1348	85	1788	79	5364	79
PVP01_0307800	flap endonuclease 1, putative	220.32	5	0	0.393702	0	1019	218	889	196	582	237	830	221	2490	221
PVP01_0308000	perforin-like protein 1	199.622	5	0	0.677944	0	1045	212	659	277	1135	108	946.333	184	2839	184
PVP01_0309100	zinc finger protein, putative	99.3104	5	0	0.740968	0	508	392	637	283	376	327	507	354	1521	345
PVP01_0313000	conserved Plasmodium protein, unknown function	98.7558	5	0	0.472767	0	445	429	319	458	266	399	343.333	515	1030	476
PVP01_0313300	calcium-dependent protein kinase 4, putative	156.588	5	0	0.222182	0	2083	83	1786	87	1585	70	1818	76	5454	76
PVP01_0315200	LEM3/CDC50 family protein, putative	94.2668	5	0	0.375561	0	660	322	477	355	286	383	474.333	386	1423	371
PVP01_0316100	apoptosis-inducing factor, putative	160.231	5	0	0.515967	0	603	343	453	367	341	346	465.667	395	1397	380
PVP01_0316800	conserved protein, unknown function	127.352	5	0	0.969173	0	364	488	155	587	96	546	205	709	615	630
PVP01_0317600	V-type ATPase V0 subunit e, putative	212.963	5	0	0.282828	0	4150	26	5070	17	3282	24	4167.33	18	12502	18
PVP01_0317700	conserved Plasmodium protein, unknown function	261.182	5	0	0.889065	0	569	360	470	360	349	342	462.667	399	1388	384
PVP01_0317800	protein pelota homolog, putative	720.681	5	0	0.788969	0	1142	185	755	243	585	236	827.333	222	2482	222
PVP01_0318400	conserved protein, unknown function	207.691	5	0	1.42666	0	383	473	NA	NA	NA	NA	383	465	383	723
PVP01_0319000	conserved protein, unknown function	1333.92	5	0	0.695772	0	3571	35	3270	42	3529	17	3456.67	31	10370	31
PVP01_0319900	type 2A phosphatase-associated protein 42, putative	276.409	5	0	0.433158	0	1171	175	950	183	683	204	934.667	185	2804	185
PVP01_0407400	conserved Plasmodium protein, unknown function	151.298	5	0	0.327345	0	1102	193	791	223	644	216	845.667	217	2537	217
PVP01_0407500	calcium-dependent protein kinase 1, putative	87.5255	5	0	0.489869	0	889	251	999	176	660	212	849.333	214	2548	214
PVP01_0408100	conserved Plasmodium protein, unknown function	586.006	5	0	0.809661	0	1189	174	757	241	621	222	855.667	212	2567	212
PVP01_0410900	T-complex protein 1 subunit theta, putative	119.832	5	0	1.54776	0	260	566	NA	NA	NA	NA	260	627	260	787
PVP01_0412300	secreted protein with altered thrombospondin repeat domain, putative	244.299	5	0	0.26519	0	4863	19	6141	10	4010	15	5004.67	14	15014	14
PVP01_0414000	conserved Plasmodium protein, unknown function	132.812	5	0	0.842844	0	411	452	151	589	213	448	258.333	630	775	565
PVP01_0414200	syntaxin, Qa-SNARE family, putative	220.461	5	0	0.603683	0	891	250	553	311	599	232	681	272	2043	272
PVP01_0415700	patatin-like phospholipase 1, putative	219.357	5	0	0.626862	0	780	280	399	401	345	345	508	352	1524	343
PVP01_0416400	conserved Plasmodium protein, unknown function	151.931	5	0	1.23904	0	209	605	99	631	NA	NA	154	787	308	757
PVP01_0416700	conserved Plasmodium protein, unknown function	94.9682	5	0	0.635067	0	308	529	176	567	NA	NA	242	648	484	675
PVP01_0418000	serine-repeat antigen (SERA)	814.358	5	0	1.38422	0	867	259	617	290	810	171	764.667	243	2294	243
PVP01_0418100	iron-sulfur assembly protein, putative	166.001	5	0	0.573517	0	1569	119	2127	72	1617	65	1771	80	5313	80
PVP01_0418200	conserved Plasmodium protein, unknown function	135.513	5	0	0.630511	0	668	318	549	314	359	337	525.333	344	1576	337
PVP01_0418700	conserved Plasmodium protein, unknown function	141.397	5	0	0.684927	0	385	471	325	453	NA	NA	355	502	710	586
PVP01_0418900	pantothenate transporter, putative	120.908	5	0	0.459953	0	1442	133	1635	99	1264	92	1447	110	4341	110
PVP01_0420400	hexose transporter	95.8944	5	0	0.461562	0	243	579	686	266	126	520	351.667	505	1055	470
PVP01_0421700	conserved Plasmodium protein, unknown function	92.8923	5	0	1.53979	0	298	536	126	609	280	388	234.667	659	704	590
PVP01_0422000	protein kinase, putative	175.686	5	0	1.15292	0	217	600	156	586	NA	NA	186.5	736	373	726
PVP01_0504400	sporozoite invasion-associated protein 2, putative	93.8156	5	0	0.307605	0	876	254	731	249	538	261	715	261	2145	261
PVP01_0504900	conserved Plasmodium protein, unknown function	129.657	5	0	1.09568	0	265	561	86	642	NA	NA	175.5	752	351	734
PVP01_0505300	coiled-coil domain-containing protein 124, putative	138.966	5	0	1.72362	0	315	523	NA	NA	NA	NA	315	547	315	753
PVP01_0505600	GPI-anchored micronemal antigen	400.024	5	0	0.375428	0	4034	29	3804	29	3119	28	3652.33	26	10957	26
PVP01_0505700	conserved protein, unknown function	126.526	5	0	0.711298	0	295	538	231	524	160	490	228.667	672	686	600
PVP01_0506100	conserved protein, unknown function	110.864	5	0	0.433787	0	527	384	367	422	253	409	382.333	467	1147	437
PVP01_0508000	SPRY domain, putative	138.462	5	0	0.927371	0	438	432	306	465	260	403	334.667	521	1004	480
PVP01_0508100	alpha/beta hydrolase, putative	327.716	5	0	0.778508	0	1076	203	824	214	644	216	848	215	2544	215
PVP01_0509300	conserved Plasmodium protein, unknown function	168.894	5	0	0.927648	0	503	394	268	493	264	401	345	510	1035	473
PVP01_0509500	conserved Plasmodium protein, unknown function	258.263	5	0	0.714208	0	718	299	394	405	286	383	466	394	1398	379
PVP01_0509700	Fe-S cluster assembly protein DRE2, putative	268.984	5	0	0.967974	0	435	435	212	537	NA	NA	323.5	532	647	614
PVP01_0513200	protein kinase 1, putative	102.88	5	0	0.477067	0	462	415	329	450	NA	NA	395.5	453	791	557
PVP01_0514700	ubiquitin-like protein, putative	234.358	5	0	0.647657	0	541	376	351	435	249	413	380.333	469	1141	439
PVP01_0515400	heat shock protein 70, putative	527.352	5	0	0.333705	0	7000	9	3821	28	4048	14	4956.33	16	14869	16
PVP01_0515500	U3 small nucleolar ribonucleoprotein protein IMP4, putative	91.5069	5	0	1.31975	0	200	612	NA	NA	NA	NA	200	714	200	828
PVP01_0516600	DNA helicase, putative	208.551	5	0	0.830027	0	337	508	198	548	166	486	233.667	661	701	592
PVP01_0516700	BEM46-like protein, putative	552.08	5	0	0.378923	0	2923	54	2401	57	1604	69	2309.33	59	6928	59
PVP01_0516800	zinc finger protein, putative	148.201	5	0	0.293142	0	1556	120	1621	102	889	157	1355.33	124	4066	124
PVP01_0517100	14-3-3 protein, putative	593.716	5	0	0.447197	0	2367	73	2856	46	1805	55	2342.67	57	7028	57
PVP01_0517200	zinc finger protein, putative	164.75	5	0	0.565634	0	1537	122	1224	144	1024	129	1261.67	135	3785	135
PVP01_0521100	acylated pleckstrin-homology domain-containing protein, putative	331.606	5	0	0.960069	0	717	300	407	395	414	309	512.667	348	1538	341
PVP01_0521400	armadillo-domain containing rhoptry protein, putative	157.147	5	0	0.388912	0	868	258	616	291	839	166	774.333	242	2323	242
PVP01_0522500	RNA-binding protein, putative	125.035	5	0	0.551722	0	557	367	360	428	NA	NA	458.5	405	917	508
PVP01_0526400	conserved Plasmodium protein, unknown function	408.787	5	0	0.631877	0	848	264	762	237	652	213	754	250	2262	250
PVP01_0526500	mRNA-binding protein PUF2, putative	285.315	5	0	0.287881	0	2655	64	2600	48	1807	54	2354	56	7062	56
PVP01_0526600	bifunctional dihydrofolate reductase-thymidylate synthase, putative	239.145	5	0	0.454116	0	1555	121	1750	91	1252	95	1519	103	4557	103
PVP01_0526700	LETM1-like protein, putative	311.403	5	0	0.706301	0	960	234	577	304	329	353	622	293	1866	293
PVP01_0527700	conserved Plasmodium protein, unknown function	702.262	5	0	0.574997	0	2206	77	1328	130	941	144	1491.67	105	4475	105
PVP01_0527800	conserved Plasmodium protein, unknown function	220.345	5	0	0.415038	0	1093	197	758	240	542	257	797.667	231	2393	231
PVP01_0528200	MOLO1 domain-containing protein, putative	122.235	5	0	1.65073	0	241	580	NA	NA	NA	NA	241	651	241	800
PVP01_0528300	conserved protein, unknown function	339.783	5	0	0.407197	0	1767	104	1402	126	906	153	1358.33	123	4075	123
PVP01_0529400	zinc finger protein, putative	384.42	5	0	0.801922	0	678	315	389	409	297	373	454.667	408	1364	391
PVP01_0529800	AP2 domain transcription factor, putative	229.564	5	0	0.369166	0	1241	161	864	203	573	243	892.667	201	2678	201
PVP01_0530300	conserved Plasmodium protein, unknown function	1114.97	5	0	1.12099	0	1358	144	1145	158	1213	98	1238.67	139	3716	139
PVP01_0532100	conserved Plasmodium protein, unknown function	86.597	5	0	0.928035	0	220	597	99	631	NA	NA	159.5	778	319	750
PVP01_0532200	conserved Plasmodium protein, unknown function	692.657	5	0	0.355499	0	3516	36	2458	53	2016	50	2663.33	48	7990	48
PVP01_0532300	early transcribed membrane protein	88.4752	5	0	0.367062	0	610	340	500	340	413	310	507.667	353	1523	344
PVP01_0602100	early transcribed membrane protein	3562.54	5	0	0.947555	0	6443	10	2422	56	2754	31	3873	23	11619	23
PVP01_0602700	myosin essential light chain ELC, putative	121.02	5	0	0.19811	0	3733	32	3791	30	1741	59	3088.33	39	9265	39
PVP01_0603800	tRNA wybutosine-synthesizing protein, putative	185.951	5	0	0.842142	0	292	540	267	494	NA	NA	279.5	599	559	650
PVP01_0607000	schizont egress antigen-1, putative	117.981	5	0	0.623263	0	287	545	254	506	236	425	259	629	777	564
PVP01_0607700	citrate synthase, mitochondrial, putative	111.915	5	0	1.34994	0	493	399	529	326	490	276	504	357	1512	348
PVP01_0607800	kelch protein K10, putative	266.885	5	0	0.948027	0	1599	115	1194	152	1071	119	1288	131	3864	131
PVP01_0609100	chromodomain-helicase-DNA-binding protein 1 homolog, putative	354.764	5	0	0.704735	0	851	263	460	365	332	351	547.667	330	1643	325
PVP01_0609300	conserved Plasmodium protein, unknown function	288.621	5	0	1.06511	0	1092	198	889	196	888	158	956.333	182	2869	182
PVP01_0609400	RNA-binding protein, putative	309.693	5	0	1.23375	0	542	375	332	447	426	304	433.333	421	1300	404
PVP01_0611200	conserved Plasmodium protein, unknown function	88.4411	5	0	1.04762	0	150	650	68	656	NA	NA	109	859	218	817
PVP01_0611700	conserved Plasmodium protein, unknown function	874.362	5	0	0.448249	0	5289	17	8809	5	8999	4	7699	6	23097	6
PVP01_0611800	conserved Plasmodium protein, unknown function	1752.09	5	0	0.691538	0	3279	44	2334	61	2027	49	2546.67	51	7640	51
PVP01_0612400	merozoite capping protein 1, putative	216.247	5	0	0.563754	0	1051	210	770	233	523	266	781.333	239	2344	239
PVP01_0613600	partial CSTF domain-containing protein, putative	96.5077	5	0	0.586602	0	374	479	300	469	224	437	299.333	570	898	517
PVP01_0613700	conserved Plasmodium protein, unknown function	174.287	5	0	0.218624	0	3423	39	4875	19	2215	46	3504.33	30	10513	30
PVP01_0614100	conserved Plasmodium protein, unknown function	1406.71	5	0	0.673939	0	2660	63	2391	59	1611	68	2220.67	64	6662	64
PVP01_0614800	conserved Plasmodium protein, unknown function	372.957	5	0	0.83452	0	1018	219	700	261	641	218	786.333	238	2359	238
PVP01_0615300	claudin-like apicomplexan microneme protein, putative	104.375	5	0	0.331913	0	1463	129	2873	44	1490	79	1942	73	5826	73
PVP01_0615400	conserved Plasmodium protein, unknown function	132.438	5	0	0.493957	0	552	369	420	385	250	412	407.333	443	1222	421
PVP01_0616700	protein GEXP15, putative	128.077	5	0	0.981543	0	356	493	148	591	123	523	209	703	627	625
PVP01_0616800	protein phosphatase inhibitor 3, putative	141.122	5	0	0.469696	0	528	383	361	427	317	361	402	449	1206	425
PVP01_0618200	S-adenosylmethionine decarboxylase/ornithine decarboxylase, putative	105.308	5	0	0.725529	0	595	345	415	389	389	319	466.333	393	1399	378
PVP01_0618500	haloacid dehalogenase-like hydrolase, putative	113.608	5	0	1.53536	0	224	593	NA	NA	NA	NA	224	682	224	812
PVP01_0618800	bromodomain protein 1, putative	230.401	5	0	0.840765	0	643	329	429	380	320	360	464	396	1392	381
PVP01_0619000	ubiquitin-conjugating enzyme E2, putative	154.69	5	0	0.635547	0	1203	168	1023	172	788	177	1004.67	175	3014	175
PVP01_0620000	methionine--tRNA ligase, putative	91.9013	5	0	0.648418	0	383	473	279	486	176	476	279.333	600	838	540
PVP01_0621300	conserved Plasmodium protein, unknown function	293.566	5	0	0.509363	0	935	238	758	240	571	244	754.667	249	2264	249
PVP01_0702100	alpha tubulin 1, putative	105.037	5	0	1.47283	0	191	618	NA	NA	NA	NA	191	729	191	835
PVP01_0703500	nucleoporin NUP221, putative	140.109	5	0	0.42612	0	829	267	640	282	441	295	636.667	289	1910	289
PVP01_0704200	conserved Plasmodium protein, unknown function	118.265	5	0	0.573899	0	410	453	262	499	219	442	297	572	891	519
PVP01_0705100	zinc finger protein, putative	325.327	5	0	0.668833	0	968	230	689	263	554	253	737	254	2211	254
PVP01_0705500	conserved Plasmodium protein, unknown function	325.434	5	0	1.38149	0	603	343	NA	NA	NA	NA	603	301	603	633
PVP01_0705900	ATP-dependent protease ATPase subunit ClpY, putative	105.763	5	0	0.56364	0	545	373	448	370	364	334	452.333	409	1357	392
PVP01_0707900	exoribonuclease, putative	108.192	5	0	2.00022	0	250	574	NA	NA	NA	NA	250	638	250	793
PVP01_0708700	conserved Plasmodium protein, unknown function	138.027	5	0	0.999478	0	649	327	486	349	267	398	467.333	392	1402	377
PVP01_0710400	inhibitor of cysteine proteases, putative	6212.27	5	0	0.511449	0	12668	4	6055	11	7203	6	8642	4	25926	4
PVP01_0710900	SAP domain-containing protein, putative	171.03	5	0	0.35748	0	1148	182	699	262	613	226	820	224	2460	224
PVP01_0712200	conserved Plasmodium protein, unknown function	359.587	5	0	1.5272	0	1080	202	1304	136	1795	57	1393	119	4179	119
PVP01_0712500	conserved Plasmodium protein, unknown function	244.354	5	0	0.240778	0	3350	43	2868	45	1959	51	2725.67	47	8177	47
PVP01_0713200	GINS complex subunit Psf3, putative	148.016	5	0	0.502037	0	574	357	323	455	288	381	395	455	1185	430
PVP01_0713300	BSD-domain protein, putative	191.2	5	0	0.634739	0	613	339	383	413	413	310	469.667	391	1409	376
PVP01_0713400	type II NADH:ubiquinone oxidoreductase, putative	203.103	5	0	0.596661	0	640	330	243	515	432	300	438.333	417	1315	400
PVP01_0714700	conserved Plasmodium protein, unknown function	107.75	5	0	0.395996	0	582	351	374	417	314	363	423.333	428	1270	409
PVP01_0715100	RNA-binding protein musashi, putative	879.339	5	0	0.64355	0	1948	89	925	190	1275	91	1382.67	122	4148	122
PVP01_0716500	cytochrome b5-like heme/steroid binding protein, putative	122.743	5	0	1.06568	0	732	291	726	251	492	275	650	283	1950	283
PVP01_0717100	conserved Plasmodium protein, unknown function	107.95	5	0	0.631757	0	414	450	NA	NA	214	447	314	548	628	624
PVP01_0717300	gamma-glutamylcysteine synthetase, putative	591.432	5	0	0.684077	0	1210	165	672	274	647	215	843	218	2529	218
PVP01_0717900	major facilitator superfamily domain-containing protein, putative	181.925	5	0	1.41095	0	414	450	NA	NA	302	370	358	498	716	583
PVP01_0718000	dolichyl-diphosphooligosaccharide--protein glycosyltransferase subunit WBP1, putative	376.925	5	0	1.04179	0	1304	150	1514	115	1066	120	1294.67	127	3884	127
PVP01_0718200	TLD domain-containing protein	257.368	5	0	0.976173	0	802	272	631	287	337	348	590	309	1770	307
PVP01_0718500	chaperone, putative	203.54	5	0	1.68108	0	409	454	NA	NA	NA	NA	409	442	409	710
PVP01_0720500	dynein intermediate chain, putative	142.82	5	0	0.470233	0	709	303	473	358	351	341	511	349	1533	342
PVP01_0720700	S-adenosylmethionine synthetase, putative	216.169	5	0	0.432753	0	895	248	781	229	506	270	727.333	258	2182	258
PVP01_0722100	lipoate-protein ligase 2, putative	104.538	5	0	1.52097	0	178	628	NA	NA	74	566	126	835	252	792
PVP01_0723600	conserved Plasmodium protein, unknown function	369.624	5	0	0.48831	0	1889	94	1577	107	1117	111	1527.67	101	4583	101
PVP01_0723700	ribosomal RNA-processing protein 8, putative	99.6782	5	0	1.39657	0	217	600	NA	NA	NA	NA	217	690	217	818
PVP01_0723900	protein phosphatase-beta, putative	1000.72	5	0	0.702821	0	2368	72	1759	89	1368	84	1831.67	75	5495	75
PVP01_0724100	zinc binding protein (Yippee), putative	206.119	5	0	1.31462	0	417	447	NA	NA	NA	NA	417	432	417	706
PVP01_0726600	conserved Plasmodium protein, unknown function	96.0709	5	0	0.652878	0	383	473	242	516	328	354	317.667	543	953	498
PVP01_0726800	conserved Plasmodium protein, unknown function	294.995	5	0	0.38499	0	2125	80	1115	162	1052	123	1430.67	114	4292	114
PVP01_0728800	merozoite surface protein 1 paralog	362.305	5	0	1.02495	0	533	379	263	498	NA	NA	398	451	796	554
PVP01_0729800	nucleolar protein Nop52, putative	175.072	5	0	0.642458	0	436	434	289	477	255	407	326.667	529	980	488
PVP01_0730200	conserved Plasmodium protein, unknown function	180.267	5	0	0.751108	0	345	502	158	584	222	439	241.667	649	725	580
PVP01_0730900	profilin, putative	463.365	5	0	0.618768	0	3113	48	3962	24	3213	27	3429.33	33	10288	33
PVP01_0733400	UBX domain-containing protein, putative	109.152	5	0	0.59043	0	405	457	208	541	259	404	290.667	580	872	524
PVP01_0802200	transformer-2 protein homolog beta, putative	148.204	5	0	0.419225	0	1945	90	1999	79	1177	103	1707	84	5121	84
PVP01_0802600	DnaJ protein, putative	86.0274	5	0	0.549926	0	281	550	163	579	150	499	198	717	594	636
PVP01_0803200	conserved Plasmodium protein, unknown function	506.013	5	0	0.726751	0	1242	160	735	247	615	224	864	209	2592	209
PVP01_0804000	E3 ubiquitin-protein ligase, putative	130.981	5	0	0.936963	0	266	560	NA	NA	173	479	219.5	686	439	696
PVP01_0804200	conserved Plasmodium protein, unknown function	117.869	5	0	1.56692	0	735	290	522	330	383	323	546.667	331	1640	326
PVP01_0806500	G-strand-binding protein 2, putative	126.355	5	0	0.499165	0	958	235	632	286	533	262	707.667	264	2123	264
PVP01_0806900	rho GTPase-activating protein, putative	674.987	5	0	0.759431	0	1894	93	1684	96	1626	64	1734.67	83	5204	83
PVP01_0807700	histone deacetylase 2, putative	225.099	5	0	0.214121	0	2947	53	2231	66	1577	71	2251.67	61	6755	61
PVP01_0807800	PHD finger protein PHD1, putative	105.35	5	0	0.609417	0	286	546	194	551	120	526	200	714	600	635
PVP01_0811600	conserved protein, unknown function	522.133	5	0	0.519902	0	4571	21	3939	25	3243	26	3917.67	22	11753	22
PVP01_0811800	DNA repair protein RAD23, putative	100.665	5	0	1.54258	0	407	455	343	440	230	431	326.667	529	980	488
PVP01_0812900	conserved Plasmodium protein, unknown function	108.532	5	0	1.89118	0	263	563	NA	NA	NA	NA	263	624	263	784
PVP01_0814600	conserved Plasmodium protein, unknown function	255.191	5	0	0.636781	0	688	309	375	416	287	382	450	411	1350	394
PVP01_0814700	transcriptional coactivator ADA2, putative	92.1759	5	0	0.50182	0	346	501	256	504	207	453	269.667	612	809	551
PVP01_0816100	conserved Plasmodium protein, unknown function	171.996	5	0	1.31792	0	517	389	557	309	523	266	532.333	338	1597	332
PVP01_0816500	U4/U6.U5 tri-snRNP-associated protein 1, putative	795.56	5	0	0.812157	0	1249	159	722	252	567	247	846	216	2538	216
PVP01_0817600	conserved Plasmodium protein, unknown function	110.917	5	0	0.510062	0	404	458	281	484	234	427	306.333	559	919	507
PVP01_0818400	WD repeat-containing protein, putative	92.9139	5	0	0.457806	0	457	418	321	457	210	450	329.333	524	988	483
PVP01_0819100	conserved Plasmodium protein, unknown function	211.883	5	0	0.590284	0	637	331	360	428	339	347	445.333	413	1336	396
PVP01_0819700	nicotinamidase, putative	107.418	5	0	1.04609	0	343	504	174	569	335	350	284	590	852	532
PVP01_0823000	6-cysteine protein	186.41	5	0	0.833665	0	836	266	597	298	620	223	684.333	268	2053	268
PVP01_0825500	conserved protein, unknown function	158.432	5	0	0.647013	0	1285	155	1188	153	1231	96	1234.67	141	3704	141
PVP01_0825600	conserved Plasmodium protein, unknown function	227.978	5	0	0.294625	0	1861	97	1555	108	1040	126	1485.33	106	4456	106
PVP01_0826200	HSP20-like chaperone, putative	122.634	5	0	1.42476	0	237	582	NA	NA	NA	NA	237	655	237	802
PVP01_0832700	spindle and kinetochore-associated protein 2, putative	95.0047	5	0	2.36161	0	325	517	NA	NA	NA	NA	325	531	325	745
PVP01_0833000	60S ribosomal protein L7, putative	141.32	5	0	1.86805	0	426	441	347	438	230	431	334.333	522	1003	481
PVP01_0834700	protein dopey homolog, putative	117.928	5	0	1.61646	0	229	590	NA	NA	NA	NA	229	671	229	808
PVP01_0834900	transporter, putative	520.664	5	0	1.04783	0	969	229	267	494	NA	NA	618	294	1236	419
PVP01_0835600	circumsporozoite (CS) protein	7316.6	5	0	0.457434	0	49917	1	23299	2	35655	1	36290.3	1	108871	1
PVP01_0835700	1-cys-glutaredoxin-like protein-1, putative	270.667	5	0	0.19386	0	5916	12	6228	7	5043	10	5729	10	17187	10
PVP01_0837700	serine/threonine protein kinase, putative	322.697	5	0	1.06974	0	963	233	609	293	621	222	731	256	2193	256
PVP01_0903900	60S acidic ribosomal protein P1, putative	284.414	5	0	0.565815	0	800	274	462	363	579	239	613.667	295	1841	294
PVP01_0905700	calcium/calmodulin-dependent protein kinase, putative	189.942	5	0	0.457877	0	775	282	533	322	484	278	597.333	303	1792	301
PVP01_0906600	conserved Apicomplexan protein, unknown function	265.746	5	0	1.69628	0	1087	199	731	249	355	339	724.333	259	2173	259
PVP01_0907900	nucleic acid binding protein, putative	98.2086	5	0	0.28596	0	903	247	880	199	494	274	759	246	2277	246
PVP01_0908100	polyadenylate-binding protein-interacting protein 1, putative	229.965	5	0	0.691126	0	1200	170	1240	141	1140	107	1193.33	147	3580	147
PVP01_0908800	IWS1-like protein, putative	188.329	5	0	0.634987	0	673	316	498	342	397	316	522.667	345	1568	338
PVP01_0911200	RNA-binding protein, putative	638.719	5	0	0.509618	0	2044	85	1397	127	1108	114	1516.33	104	4549	104
PVP01_0912600	peptidyl-prolyl cis-trans isomerase, putative	396.079	5	0	0.681035	0	4106	27	3386	38	1640	63	3044	40	9132	40
PVP01_0914900	rhomboid protease ROM1, putative	142.934	5	0	0.358023	0	2710	60	3331	39	2320	42	2787	46	8361	46
PVP01_0915400	cyclin-dependent-like kinase CLK3, putative	145.115	5	0	1.02596	0	246	577	182	561	244	417	224	682	672	607
PVP01_0917300	dipeptidyl aminopeptidase 1, putative	150.927	5	0	0.828731	0	737	289	1021	173	926	146	894.667	199	2684	199
PVP01_0917500	conserved protein, unknown function	662.914	5	0	0.324583	0	5553	14	6172	8	3709	16	5144.67	13	15434	13
PVP01_0920300	conserved Plasmodium protein, unknown function	450.2	5	0	0.632957	0	1055	207	930	188	622	221	869	207	2607	207
PVP01_0920600	conserved protein, unknown function	175.193	5	0	0.878645	0	381	475	254	506	250	412	295	575	885	521
PVP01_0920800	conserved Plasmodium protein, unknown function	373.143	5	0	0.712129	0	1010	221	813	218	703	200	842	219	2526	219
PVP01_0920900	CorA-like Mg2 transporter protein, putative	94.728	5	0	0.451731	0	591	349	522	330	392	318	501.667	358	1505	349
PVP01_0921000	alpha/beta hydrolase fold domain containing protein, putative	200.945	5	0	0.538736	0	948	236	928	189	520	267	798.667	230	2396	230
PVP01_0921600	palmitoyltransferase DHHC3, putative	107.459	5	0	0.317045	0	2057	84	2321	62	1614	67	1997.33	72	5992	72
PVP01_0922200	exported protein 1, putative	197.905	5	0	1.18137	0	591	349	327	452	450	291	456	407	1368	390
PVP01_0923400	calcium-dependent protein kinase 6, putative	1942.69	5	0	0.53896	0	4643	20	3622	35	2600	33	3621.67	27	10865	27
PVP01_0923600	conserved Plasmodium protein, unknown function	262.139	5	0	0.519494	0	857	260	532	323	539	260	642.667	286	1928	286
PVP01_0924100	golgi protein 2, putative	139.343	5	0	1.7244	0	270	556	NA	NA	NA	NA	270	611	270	777
PVP01_0925500	conserved Plasmodium protein, unknown function	811.603	5	0	0.79039	0	1460	130	994	177	923	147	1125.67	155	3377	155
PVP01_0926700	threonine--tRNA ligase, putative	134.155	5	0	0.65062	0	1025	216	1047	168	874	161	982	178	2946	178
PVP01_0927000	DnaJ protein, putative	1620.4	5	0	0.85235	0	2420	70	1329	129	964	138	1571	96	4713	96
PVP01_0927300	steryl ester hydrolase, putative	437.323	5	0	1.11767	0	490	400	433	379	NA	NA	461.5	401	923	505
PVP01_0927900	conserved Plasmodium protein, unknown function	177.05	5	0	0.138706	0	4422	22	4785	20	3398	21	4201.67	17	12605	17
PVP01_0928500	TFIIS central domain-containing protein, putative	155.887	5	0	0.909867	0	476	408	359	429	251	411	362	494	1086	460
PVP01_0928700	conserved Plasmodium protein, unknown function	254.615	5	0	1.09694	0	443	430	231	524	176	476	283.333	591	850	533
PVP01_0929800	parasitophorous vacuolar protein 1, putative	133.846	5	0	0.922657	0	240	581	344	439	260	403	281.333	595	844	537
PVP01_0931900	serpentine receptor 1, putative	100.315	5	0	0.870638	0	270	556	148	591	NA	NA	209	703	418	705
PVP01_0933200	conserved Plasmodium protein, unknown function	167.403	5	0	0.582376	0	573	358	356	431	243	418	390.667	460	1172	432
PVP01_0933800	conserved Plasmodium protein, unknown function	351.891	5	0	0.458617	0	2011	87	1533	113	1158	105	1567.33	97	4702	97
PVP01_0933900	conserved Plasmodium protein, unknown function	107.86	5	0	1.42817	0	173	631	83	644	NA	NA	128	831	256	790
PVP01_0934200	apical membrane antigen 1	1478.06	5	0	0.708361	0	3682	33	2484	52	2864	30	3010	42	9030	42
PVP01_0934800	heat shock protein 70, putative	416.528	5	0	0.318039	0	2881	55	2244	65	1394	83	2173	66	6519	66
PVP01_0937400	casein kinase 1, putative	87.2045	5	0	0.350927	0	594	346	450	369	346	344	463.333	398	1390	383
PVP01_0937800	subtilisin-like protease 2, putative	188.3	5	0	1.32299	0	392	466	278	487	265	400	311.667	550	935	501
PVP01_0938800	sporozoite surface protein essential for liver stage development, putative	4972.27	5	0	0.72124	0	10023	5	5808	12	7418	5	7749.67	5	23249	5
PVP01_0939500	protein phosphatase PPM2, putative	224.225	5	0	1.09633	0	909	246	537	319	380	325	608.667	297	1826	296
PVP01_0939800	WD repeat-containing protein, putative	668.724	5	0	0.772676	0	1252	157	756	242	690	202	899.333	196	2698	196
PVP01_0940300	conserved Plasmodium protein, unknown function	124.834	5	0	1.28756	0	262	564	163	579	223	438	216	692	648	613
PVP01_0942400	OTU domain-containing protein, putative	123.151	5	0	0.614462	0	265	561	NA	NA	722	195	493.5	366	987	484
PVP01_0942500	EELM2 domain-containing protein, putative	152.925	5	0	0.482824	0	511	391	269	492	1208	100	662.667	279	1988	279
PVP01_0943000	conserved Plasmodium protein, unknown function	271.304	5	0	0.573293	0	1008	222	699	262	577	240	761.333	244	2284	244
PVP01_0945600	ras-related protein Rab-6, putative	157.866	5	0	0.844804	0	672	317	581	303	503	272	585.333	310	1756	308
PVP01_0947200	oocyst rupture protein 1, putative	481.911	5	0	0.919363	0	1061	205	857	204	689	203	869	207	2607	207
PVP01_0947600	sporozoite asparagine-rich protein	330.596	5	0	0.954991	0	567	361	269	492	NA	NA	418	431	836	541
PVP01_0947700	dynein light chain, putative	324.541	5	0	0.846076	0	622	337	371	420	242	419	411.667	441	1235	420
PVP01_0948200	conserved Plasmodium protein, unknown function	155.171	5	0	2.0148	0	232	587	130	605	183	471	181.667	744	545	654
PVP01_0948300	ATP synthase subunit delta, mitochondrial, putative	99.437	5	0	0.997726	0	283	548	NA	NA	144	505	213.5	696	427	700
PVP01_0948400	membrane associated erythrocyte binding-like protein, putative	131.727	5	0	2.74726	0	146	652	85	643	163	489	131.333	824	394	716
PVP01_1002700	conserved Plasmodium protein, unknown function	506.116	5	0	0.734157	0	1393	141	608	294	650	214	883.667	203	2651	203
PVP01_1002800	SURF1 domain-containing protein, putative	86.0864	5	0	0.70501	0	328	514	NA	NA	140	509	234	660	468	680
PVP01_1002900	formin 1, putative	179.136	5	0	0.774415	0	415	449	232	523	177	475	274.667	605	824	546
PVP01_1003900	conserved Plasmodium protein, unknown function	241.517	5	0	1.23386	0	1864	96	1787	86	1106	115	1585.67	94	4757	94
PVP01_1005500	conserved protein, unknown function	172.051	5	0	0.645448	0	563	364	398	402	NA	NA	480.5	381	961	495
PVP01_1008000	inner membrane complex protein 1g, putative	420.937	5	0	0.378821	0	2305	74	1458	120	1028	128	1597	92	4791	92
PVP01_1008600	structural maintenance of chromosomes protein 6, putative	178.209	5	0	1.36173	0	332	511	NA	NA	75	565	203.5	711	407	711
PVP01_1010000	MerC domain-containing protein, putative	124.303	5	0	1.48929	0	277	552	NA	NA	NA	NA	277	602	277	773
PVP01_1010500	DnaJ protein, putative	102.979	5	0	0.239001	0	1603	114	2016	78	1150	106	1589.67	93	4769	93
PVP01_1011000	zinc finger protein, putative	106.428	5	0	0.54902	0	367	486	234	521	181	472	260.667	626	782	562
PVP01_1011500	conserved Plasmodium protein, unknown function	132.525	5	0	1.01286	0	312	525	124	611	69	570	168.333	764	505	666
PVP01_1011800	conserved Plasmodium protein, unknown function	156.898	5	0	0.344265	0	4267	25	4752	21	2392	39	3803.67	25	11411	25
PVP01_1011900	conserved Plasmodium protein, unknown function	171.968	5	0	0.370714	0	4380	23	5301	15	2229	45	3970	21	11910	21
PVP01_1013800	protein phosphatase 2C, putative	95.2759	5	0	0.435267	0	717	300	517	333	580	238	604.667	300	1814	299
PVP01_1014200	FoP domain-containing protein, putative	593.609	5	0	0.454197	0	3640	34	3605	36	2325	41	3190	37	9570	37
PVP01_1014700	V-type proton ATPase 16 kDa proteolipid subunit, putative	136.331	5	0	0.40923	0	2773	58	3827	27	2490	37	3030	41	9090	41
PVP01_1014800	50S ribosomal protein L14, mitochondrial, putative	418.079	5	0	1.14149	0	574	357	406	396	432	300	470.667	389	1412	374
PVP01_1014900	histone RNA hairpin-binding protein, putative	87.4924	5	0	0.616884	0	682	312	465	361	332	351	493	367	1479	356
PVP01_1021400	conserved Plasmodium protein, unknown function	86.4876	5	0	0.512089	0	352	496	188	556	235	426	258.333	630	775	565
PVP01_1022000	prefoldin subunit 6, putative	103.672	5	0	0.522018	0	467	412	NA	NA	298	372	382.5	466	765	568
PVP01_1022500	RNA pseudouridylate synthase, putative	552.29	5	0	0.904984	0	874	255	679	268	505	271	686	267	2058	267
PVP01_1022600	conserved Plasmodium protein, unknown function	3216.25	5	0	0.546966	0	7179	8	5722	13	5702	7	6201	9	18603	9
PVP01_1022700	MORN repeat protein, putative	263.853	5	0	0.758202	0	515	390	248	511	221	440	328	527	984	486
PVP01_1023500	topoisomerase I, putative	154.316	5	0	0.510715	0	595	345	359	429	355	339	436.333	419	1309	402
PVP01_1023900	KH domain-containing protein, putative	126.626	5	0	0.585318	0	483	404	332	447	264	401	359.667	496	1079	462
PVP01_1024000	conserved Plasmodium protein, unknown function	102.456	5	0	0.694586	0	414	450	149	590	231	430	264.667	619	794	555
PVP01_1025900	SET domain protein, putative	438.433	5	0	0.59085	0	1163	178	846	208	725	193	911.333	190	2734	190
PVP01_1026000	6-cysteine protein	89.522	5	0	0.66646	0	555	368	481	353	553	254	529.667	341	1589	334
PVP01_1027200	transcription factor 25, putative	106.901	5	0	1.99252	0	304	531	NA	NA	NA	NA	304	562	304	760
PVP01_1027500	conserved Plasmodium protein, unknown function	486.288	5	0	0.929528	0	793	276	353	434	332	351	492.667	368	1478	357
PVP01_1028700	UDP-N-acetylglucosamine transporter, putative	124.512	5	0	1.57127	0	266	560	NA	NA	NA	NA	266	616	266	781
PVP01_1030600	serine/arginine-rich splicing factor 12, putative	86.541	5	0	1.84813	0	206	607	NA	NA	NA	NA	206	708	206	825
PVP01_1032700	conserved Plasmodium protein, unknown function	325.395	5	0	1.00802	0	1595	117	1595	105	1495	78	1561.67	98	4685	98
PVP01_1105100	conserved protein, unknown function	394.408	5	0	1.10691	0	698	306	413	390	392	318	501	359	1503	350
PVP01_1105700	conserved Plasmodium protein, unknown function	98.0846	5	0	0.4542	0	481	405	291	476	154	496	308.667	555	926	504
PVP01_1105900	DIP13 homolog, putative	414.793	5	0	0.900434	0	1429	136	1171	154	1032	127	1210.67	144	3632	144
PVP01_1106200	conserved Plasmodium protein, unknown function	94.7052	5	0	1.22653	0	295	538	204	544	234	427	244.333	645	733	577
PVP01_1106300	SNARE associated Golgi protein, putative	86.9377	5	0	0.924305	0	279	551	247	512	NA	NA	263	624	526	661
PVP01_1110200	glideosome-associated connector, putative	247.596	5	0	0.342641	0	2450	67	2521	50	1723	60	2231.33	62	6694	62
PVP01_1110300	cytochrome c oxidase subunit 2A, putative	192.21	5	0	0.522952	0	666	319	357	430	325	356	449.333	412	1348	395
PVP01_1110800	conserved Plasmodium protein, unknown function	505.039	5	0	0.783633	0	1291	153	1002	175	731	191	1008	172	3024	172
PVP01_1110900	protein transport protein Sec24A, putative	98.692	5	0	1.97995	0	247	576	NA	NA	NA	NA	247	642	247	795
PVP01_1111200	falcilysin, putative	1410.55	5	0	0.652854	0	3746	30	3714	32	3275	25	3578.33	28	10735	28
PVP01_1115100	serine/threonine protein kinase ARK3, putative	355.833	5	0	0.62065	0	1151	180	884	198	562	248	865.667	208	2597	208
PVP01_1116200	NLI interacting factor-like phosphatase, putative	88.226	5	0	0.487364	0	399	462	243	515	156	494	266	616	798	553
PVP01_1116800	DNA replication licensing factor MCM6, putative	161.887	5	0	0.539089	0	545	373	333	446	239	422	372.333	480	1117	450
PVP01_1117100	conserved Plasmodium protein, unknown function	87.5171	5	0	2.17545	0	192	617	88	641	176	476	152	791	456	687
PVP01_1117400	V-type proton ATPase 21 kDa proteolipid subunit, putative	137.537	5	0	0.521629	0	1713	107	1714	94	1210	99	1545.67	99	4637	99
PVP01_1118400	conserved Plasmodium protein, unknown function	96.9022	5	0	0.582339	0	322	519	131	604	244	417	232.333	663	697	593
PVP01_1119800	SET domain protein, putative	718.788	5	0	0.865964	0	1420	137	816	217	468	282	901.333	195	2704	195
PVP01_1120200	phosphatidylcholine-sterol acyltransferase, putative	304.283	5	0	0.24605	0	3401	41	3695	33	2963	29	3353	35	10059	35
PVP01_1120400	nicotinate phosphoribosyltransferase, putative	155.031	5	0	1.37002	0	291	541	NA	NA	NA	NA	291	579	291	767
PVP01_1121300	eukaryotic translation initiation factor 2-alpha kinase, putative	191.697	5	0	1.22261	0	1150	181	761	238	548	256	819.667	225	2459	225
PVP01_1121400	HECT domain-containing protein 1, putative	332.907	5	0	0.488918	0	1148	182	823	215	723	194	898	198	2694	198
PVP01_1122200	E3 ubiquitin-protein ligase RNF5, putative	363.369	5	0	0.920693	0	821	269	474	357	446	292	580.333	313	1741	310
PVP01_1122700	pyruvate kinase, putative	104.997	5	0	0.458866	0	687	310	372	419	399	315	486	373	1458	362
PVP01_1124400	sphingomyelin synthase 2, putative	151.596	5	0	0.899231	0	324	518	317	459	232	429	291	579	873	523
PVP01_1124500	sphingomyelin synthase 1, putative	88.6037	5	0	0.701103	0	622	337	637	283	579	239	612.667	296	1838	295
PVP01_1124800	N-acetylglucosaminyl-phosphatidylinositol de-N-acetylase, putative	146.223	5	0	0.401701	0	1015	220	711	257	556	252	760.667	245	2282	245
PVP01_1124900	ISWI chromatin-remodeling complex ATPase, putative	244.354	5	0	0.350905	0	1597	116	1296	138	820	169	1237.67	140	3713	140
PVP01_1126400	nuclear polyadenylated RNA-binding protein NAB2, putative	691.862	5	0	1.02654	0	1120	189	555	310	359	337	678	273	2034	273
PVP01_1129800	F-box protein FBXO1, putative	193.727	5	0	0.878238	0	493	399	169	574	131	517	264.333	620	793	556
PVP01_1131600	histone H3 variant, putative	3564.62	5	0	0.605482	0	5620	13	4941	18	4417	12	4992.67	15	14978	15
PVP01_1131800	conserved Plasmodium protein, unknown function	144.799	5	0	0.222894	0	3137	47	4208	23	2657	32	3334	36	10002	36
PVP01_1132600	TRAP-like protein, putative	2683.13	5	0	0.719855	0	5544	15	2392	58	2580	34	3505.33	29	10516	29
PVP01_1132700	conserved Plasmodium protein, unknown function	320.038	5	0	0.44866	0	1052	209	801	221	830	168	894.333	200	2683	200
PVP01_1134900	cytosolic Fe-S cluster assembly factor NAR1, putative	345.057	5	0	0.807757	0	593	347	270	491	289	380	384	464	1152	436
PVP01_1135200	myosin E, putative	116.367	5	0	0.710761	0	252	572	178	565	140	509	190	730	570	645
PVP01_1137400	conserved Plasmodium protein, unknown function	102.146	5	0	0.563591	0	388	470	333	446	283	385	334.667	521	1004	480
PVP01_1138300	transcription elongation factor SPT5, putative	107.308	5	0	0.613694	0	368	485	221	531	NA	NA	294.5	576	589	640
PVP01_1139500	cardiolipin synthetase, putative	192.128	5	0	1.15652	0	349	499	NA	NA	211	449	280	597	560	649
PVP01_1142400	polypyrimidine tract-binding protein, putative	348.004	5	0	0.648577	0	886	253	546	315	360	336	597.333	303	1792	301
PVP01_1143800	RNA-binding protein, putative	269.726	5	0	0.631615	0	935	238	771	232	638	219	781.333	239	2344	239
PVP01_1144400	GYF domain-containing protein, putative	892.832	5	0	0.5431	0	2606	65	2028	77	1557	75	2063.67	69	6191	69
PVP01_1203900	AP2 domain transcription factor AP2-O4, putative	211.462	5	0	0.593605	0	656	324	597	298	462	285	571.667	319	1715	316
PVP01_1206200	conserved Plasmodium protein, unknown function	100.951	5	0	0.528959	0	532	380	328	451	312	364	390.667	460	1172	432
PVP01_1207300	DNA/RNA-binding protein Alba 4, putative	229.881	5	0	0.498077	0	1085	200	810	219	835	167	910	191	2730	191
PVP01_1208400	VPS13 domain-containing protein, putative	336.1	5	0	1.02361	0	558	366	227	528	314	363	366.333	488	1099	456
PVP01_1208500	DNA/RNA-binding protein Alba 2, putative	190.462	5	0	0.525965	0	779	281	364	425	440	296	527.667	342	1583	335
PVP01_1210400	conserved Plasmodium protein, unknown function	572.533	5	0	0.374737	0	2962	52	1933	80	1797	56	2230.67	63	6692	63
PVP01_1211500	CDT1-like protein, putative	102.03	5	0	0.632544	0	271	555	221	531	148	501	213.333	697	640	619
PVP01_1211800	phosphoethanolamine N-methyltransferase	88.3399	5	0	1.01296	0	282	549	NA	NA	181	472	231.5	665	463	683
PVP01_1211900	AP2 domain transcription factor, putative	107.428	5	0	0.562753	0	632	333	464	362	346	344	480.667	380	1442	367
PVP01_1212300	sporozoite protein essential for cell traversal, putative	647.848	5	0	0.204462	0	12755	3	12745	3	9852	3	11784	3	35352	3
PVP01_1213900	sodium-dependent phosphate transporter, putative	1015.66	5	0	0.813062	0	3163	46	2183	69	2248	44	2531.33	52	7594	52
PVP01_1214000	mitochondrial pyruvate carrier protein 1, putative	96.1017	5	0	0.425429	0	446	428	364	425	220	441	343.333	515	1030	476
PVP01_1214500	nucleolar complex protein 2, putative	154.02	5	0	1.25156	0	319	521	NA	NA	NA	NA	319	542	319	750
PVP01_1215100	conserved Plasmodium protein, unknown function	229.828	5	0	0.787745	0	591	349	340	441	311	365	414	435	1242	415
PVP01_1218400	conserved Plasmodium protein, unknown function	144.677	5	0	1.34145	0	724	295	417	388	167	485	436	420	1308	403
PVP01_1218600	conserved Plasmodium protein, unknown function	154.319	5	0	0.337853	0	916	244	852	205	782	180	850	213	2550	213
PVP01_1218700	thrombospondin-related anonymous protein, putative	380.676	5	0	0.803188	0	1732	105	1286	139	1319	88	1445.67	111	4337	111
PVP01_1221500	ubiquitin-activating enzyme, putative	183.863	5	0	0.690246	0	453	422	227	528	189	466	289.667	581	869	525
PVP01_1221600	conserved Plasmodium protein, unknown function	259.195	5	0	0.718733	0	868	258	770	233	567	247	735	255	2205	255
PVP01_1224800	apicoplast calcium binding protein 1, putative	191.726	5	0	1.0528	0	986	224	834	210	800	174	873.333	205	2620	205
PVP01_1224900	conserved Plasmodium protein, unknown function	230.861	5	0	1.71637	0	545	373	NA	NA	NA	NA	545	334	545	654
PVP01_1225100	AMP deaminase, putative	1183.53	5	0	0.492795	0	5291	16	3725	31	3315	23	4110.33	19	12331	19
PVP01_1226000	conserved protein, unknown function	119.243	5	0	0.333504	0	948	236	848	206	600	231	798.667	230	2396	230
PVP01_1226900	conserved protein, unknown function	626.245	5	0	1.252	0	809	271	592	299	596	234	665.667	278	1997	278
PVP01_1227100	conserved Plasmodium protein, unknown function	553.344	5	0	0.793706	0	960	234	611	292	574	242	715	261	2145	261
PVP01_1228600	conserved Plasmodium protein, unknown function	189.546	5	0	0.264027	0	1852	98	1604	104	1126	109	1527.33	102	4582	102
PVP01_1230400	micro-fibrillar-associated protein, putative	115.638	5	0	0.26854	0	1170	176	907	194	503	272	860	210	2580	210
PVP01_1231100	plasmepsin V	86.3337	5	0	0.71177	0	241	580	NA	NA	209	451	225	679	450	690
PVP01_1232100	palmitoyltransferase DHHC5, putative	106.754	5	0	1.40591	0	224	593	NA	NA	NA	NA	224	682	224	812
PVP01_1232200	conserved Plasmodium protein, unknown function	507.136	5	0	0.441017	0	1808	100	1614	103	946	142	1456	109	4368	109
PVP01_1232800	protein transport protein SFT2, putative	113.41	5	0	0.8396	0	758	284	834	210	360	336	650.667	282	1952	282
PVP01_1233600	DnaJ protein, putative	218.353	5	0	0.747479	0	1207	166	1011	174	803	173	1007	173	3021	173
PVP01_1234500	conserved protein, unknown function	197.316	5	0	1.79446	0	425	442	NA	NA	NA	NA	425	427	425	701
PVP01_1235600	sulfate transporter, putative	1126.03	5	0	0.797822	0	1845	99	948	184	723	194	1172	150	3516	150
PVP01_1236500	conserved Plasmodium protein, unknown function	188.114	5	0	0.365817	0	1119	190	715	255	559	250	797.667	231	2393	231
PVP01_1236600	conserved Plasmodium protein, unknown function	196.353	5	0	0.680356	0	533	379	273	489	292	377	366	489	1098	457
PVP01_1238400	zinc finger protein, putative	223.256	5	0	0.416707	0	1195	172	738	246	429	302	787.333	237	2362	237
PVP01_1238700	MORC family protein, putative	178.072	5	0	0.522504	0	588	350	425	382	297	373	436.667	418	1310	401
PVP01_1238800	conserved Plasmodium protein, unknown function	569.825	5	0	0.561947	0	2037	86	1213	147	1118	110	1456	109	4368	109
PVP01_1238900	rab GTPase activator, putative	131.499	5	0	0.892694	0	368	485	216	535	227	434	270.333	610	811	550
PVP01_1240400	AP2 domain transcription factor AP2-EXP, putative	176.494	5	0	0.837884	0	362	489	204	544	NA	NA	283	592	566	647
PVP01_1240500	26S proteasome regulatory subunit RPN2, putative	148.541	5	0	0.424679	0	1203	168	1046	169	812	170	1020.33	170	3061	170
PVP01_1242100	vacuolar ATP synthase subunit d, putative	352.689	5	0	0.488183	0	2699	61	2116	73	1710	61	2175	65	6525	65
PVP01_1242200	serine/threonine protein phosphatase UIS2, putative	1680.48	5	0	0.537412	0	4334	24	2944	43	2202	47	3160	38	9480	38
PVP01_1244500	GTP-binding protein, putative	651.991	5	0	0.748268	0	1142	185	685	267	609	228	812	227	2436	227
PVP01_1247100	bax inhibitor 1, putative	359.905	5	0	0.543148	0	1402	140	1045	170	982	135	1143	152	3429	152
PVP01_1248400	spindle assembly abnormal protein 4, putative	86.5764	5	0	1.1088	0	204	609	113	619	78	564	131.667	823	395	715
PVP01_1249000	conserved Plasmodium protein, unknown function	238.702	5	0	1.45908	0	485	403	225	529	123	523	277.667	601	833	542
PVP01_1249700	thioredoxin 1, putative	336.688	5	0	0.26369	0	3737	31	4327	22	3366	22	3810	24	11430	24
PVP01_1251200	conserved Plasmodium protein, unknown function	672.275	5	0	0.663014	0	1393	141	1231	143	911	151	1178.33	148	3535	148
PVP01_1255300	calcineurin subunit B, putative	199.535	5	0	0.556015	0	744	286	365	424	345	345	484.667	375	1454	364
PVP01_1256300	conserved Plasmodium protein, unknown function	336.792	5	0	0.669917	0	1092	198	338	442	289	380	573	318	1719	315
PVP01_1257900	CLASP domain-containing protein, putative	213.073	5	0	0.723803	0	1234	162	830	212	787	178	950.333	183	2851	183
PVP01_1258000	gamete egress and sporozoite traversal protein, putative	604.892	5	0	0.165476	0	27030	2	24765	1	18088	2	23294.3	2	69883	2
PVP01_1258100	conserved protein, unknown function	104.502	5	0	1.46377	0	213	602	NA	NA	NA	NA	213	698	213	819
PVP01_1260100	glutaminyl-peptide cyclotransferase, putative	202.472	5	0	0.822782	0	1143	184	913	193	916	149	990.667	176	2972	176
PVP01_1260300	conserved Plasmodium protein, unknown function	91.7999	5	0	0.363215	0	661	321	405	397	304	368	456.667	406	1370	389
PVP01_1260800	M17 leucyl aminopeptidase	118.916	5	0	0.724515	0	321	520	245	513	170	482	245.333	644	736	576
PVP01_1261400	RNA-binding protein, putative	245.499	5	0	0.543959	0	773	283	506	338	371	330	550	326	1650	322
PVP01_1261600	protein serine/threonine kinase-1, putative	133.485	5	0	0.807726	0	933	239	889	196	577	240	799.667	229	2399	229
PVP01_1264600	protein KIC9, putative	149.155	5	0	0.998407	0	267	559	72	652	46	588	128.333	830	385	721
PVP01_1265000	ADP-ribosylation factor, putative	119.404	5	0	0.669951	0	330	513	201	546	NA	NA	265.5	617	531	660
PVP01_1265100	RNA polymerase II transcription factor B subunit 5, putative	128.95	5	0	1.46609	0	248	575	NA	NA	NA	NA	248	639	248	794
PVP01_1265400	acid cluster protein 33 homologue, putative	139.859	5	0	1.12211	0	592	348	674	272	480	280	582	311	1746	309
PVP01_1267500	oocyst rupture protein 2, putative	151.64	5	0	0.569161	0	817	270	605	296	457	288	626.333	290	1879	290
PVP01_1269300	conserved Plasmodium protein, unknown function	110.34	5	0	0.677965	0	647	328	461	364	367	333	491.667	369	1475	358
PVP01_1269400	splicing factor 3A subunit 1, putative	222.079	5	0	0.979383	0	442	431	223	530	119	527	261.333	625	784	560
PVP01_1269800	trailer hitch homolog, putative	98.8662	5	0	0.542396	0	364	488	166	576	144	505	224.667	680	674	606
PVP01_1270300	cysteine repeat modular protein 4, putative	113.038	5	0	3.13714	0	78	706	49	674	98	544	75	906	225	811
PVP01_1271000	early transcribed membrane protein	615.716	5	0	0.800787	0	918	243	606	295	443	294	655.667	281	1967	281
PVP01_1301900	nuclear export mediator factor NEMF, putative	438.79	5	0	0.731769	0	1098	195	675	271	586	235	786.333	238	2359	238
PVP01_1302200	high mobility group protein B1, putative	102.7	5	0	1.9033	0	264	562	113	619	88	554	155	785	465	681
PVP01_1303000	nucleosome assembly protein, putative	209.627	5	0	1.41465	0	476	408	291	476	221	440	329.333	524	988	483
PVP01_1304300	HAD domain ookinete protein, putative	105.146	5	0	0.395505	0	504	393	485	350	339	347	442.667	415	1328	398
PVP01_1304900	high mobility group protein B3, putative	121.586	5	0	0.597234	0	495	397	289	477	275	392	353	503	1059	468
PVP01_1305000	conserved protein, unknown function	112.653	5	0	2.09214	0	314	524	NA	NA	NA	NA	314	548	314	754
PVP01_1305300	eukaryotic translation initiation factor 3 subunit C, putative	118.764	5	0	1.00227	0	218	599	102	628	NA	NA	160	777	320	749
PVP01_1305400	conserved Plasmodium protein, unknown function	736.832	5	0	0.831157	0	1436	134	933	187	753	188	1040.67	167	3122	167
PVP01_1305500	thiosulfate sulfurtransferase, putative	204.76	5	0	0.987943	0	617	338	428	381	395	317	480	382	1440	368
PVP01_1305800	eukaryotic translation initiation factor 5, putative	113.931	5	0	0.458505	0	578	354	418	387	282	386	426	426	1278	408
PVP01_1306200	pre-rRNA-processing protein ESF1, putative	185.405	5	0	0.713911	0	628	334	500	340	294	376	474	387	1422	372
PVP01_1306500	conserved Plasmodium protein, unknown function	1361.07	5	0	1.14512	0	2551	66	1327	131	998	132	1625.33	90	4876	90
PVP01_1307900	zinc finger protein, putative	124.286	5	0	0.820881	0	787	278	687	265	576	241	683.333	269	2050	269
PVP01_1308000	protein phosphatase PPM11, putative	148.224	5	0	0.451313	0	887	252	509	335	379	326	591.667	307	1775	305
PVP01_1308200	conserved Plasmodium protein, unknown function	224.023	5	0	0.605522	0	623	336	438	375	352	340	471	388	1413	373
PVP01_1308600	cGMP-specific 3',5'-cyclic phosphodiesterase alpha, putative	898.373	5	0	0.514464	0	2742	59	2098	74	1573	72	2137.67	68	6413	68
PVP01_1309300	syntaxin, Qa-SNARE family, putative	102.179	5	0	1.09121	0	542	375	560	308	480	280	527.333	343	1582	336
PVP01_1310000	conserved Plasmodium protein, unknown function	91.9558	5	0	2.13782	0	264	562	NA	NA	NA	NA	264	621	264	783
PVP01_1310600	DnaJ domain containing protein	379.854	5	0	0.34614	0	2131	79	1631	100	1218	97	1660	89	4980	89
PVP01_1311000	polyubiquitin, putative	176.389	5	0	0.332152	0	1700	108	1162	155	761	186	1207.67	145	3623	145
PVP01_1312500	N-acetyltransferase, GNAT family, putative	90.7748	5	0	0.469317	0	326	516	229	526	235	426	263.333	623	790	558
PVP01_1314200	glutamate synthase [NADH], putative	450.149	5	0	0.980595	0	2083	83	1790	85	1425	82	1766	81	5298	81
PVP01_1315100	conserved protein, unknown function	1177.74	5	0	0.36275	0	5984	11	5311	14	4602	11	5299	11	15897	11
PVP01_1316100	PHD finger protein PHD2, putative	93.5561	5	0	0.793123	0	191	618	131	604	175	477	165.667	769	497	670
PVP01_1316800	protein-L-isoaspartate(D-aspartate) O-methyltransferase, putative	182.699	5	0	0.282107	0	1522	124	1580	106	945	143	1349	125	4047	125
PVP01_1317300	conserved Plasmodium protein, unknown function	298.208	5	0	1.47713	0	711	302	361	427	276	391	449.333	412	1348	395
PVP01_1319300	serine/threonine protein phosphatase 2A activator, putative	115.036	5	0	0.429409	0	479	406	334	445	367	333	393.333	456	1180	431
PVP01_1319400	conserved protein, unknown function	296.534	5	0	0.325065	0	1784	103	1622	101	1428	81	1611.33	91	4834	91
PVP01_1325300	conserved Plasmodium protein, unknown function	287.167	5	0	0.63536	0	1097	196	866	201	614	225	859	211	2577	211
PVP01_1325400	calcium-dependent protein kinase, putative	771.225	5	0	1.18608	0	1301	151	599	297	568	246	822.667	223	2468	223
PVP01_1325700	serine/threonine protein phosphatase 7, putative	146.915	5	0	0.807598	0	396	464	0	696	210	450	202	712	606	632
PVP01_1327800	conserved Plasmodium protein, unknown function	107.295	5	0	0.539196	0	456	419	391	407	0	608	282.333	593	847	535
PVP01_1330800	liver specific protein 1, putative	379.421	5	0	1.76015	0	546	372	195	550	165	487	302	565	906	513
PVP01_1331300	conserved Plasmodium protein, unknown function	280.611	5	0	0.57648	0	960	234	810	219	614	225	794.667	233	2384	233
PVP01_1331500	rap guanine nucleotide exchange factor, putative	145.309	5	0	0.695872	0	421	443	295	473	219	442	311.667	550	935	501
PVP01_1331700	NOT family protein, putative	187.77	5	0	0.608493	0	683	311	390	408	317	361	463.333	398	1390	383
PVP01_1332400	NADP-specific glutamate dehydrogenase, putative	139.931	5	0	1.06427	0	914	245	865	202	968	137	915.667	189	2747	189
PVP01_1333500	Btz domain-containing protein, putative	336.393	5	0	0.454628	0	1898	92	1452	122	938	145	1429.33	115	4288	115
PVP01_1334400	atypical protein kinase, ABC-1 family, putative	531.398	5	0	0.710562	0	1159	179	541	317	516	268	738.667	253	2216	253
PVP01_1334500	serine/threonine protein phosphatase PP1, putative	93.2837	5	0	0.5607	0	348	500	165	577	135	513	216	692	648	613
PVP01_1335200	conserved Plasmodium protein, unknown function	180.71	5	0	0.752717	0	581	352	291	476	254	408	375.333	475	1126	445
PVP01_1338000	ribosome maturation protein SBDS, putative	404.206	5	0	0.872559	0	1023	217	552	312	423	306	666	277	1998	277
PVP01_1341400	pre-mRNA-splicing factor 38B, putative	143.175	5	0	0.395223	0	873	256	570	306	380	325	607.667	299	1823	298
PVP01_1342500	transcription elongation factor SPT6, putative	314.095	5	0	0.751606	0	718	299	401	400	261	402	460	403	1380	387
PVP01_1343000	ribosome biogenesis protein BOP1, putative	87.2747	5	0	2.48626	0	265	561	NA	NA	NA	NA	265	618	265	782
PVP01_1343900	conserved Plasmodium protein, unknown function	393.473	5	0	0.253846	0	3431	38	2733	47	1571	73	2578.33	49	7735	49
PVP01_1344100	cysteine-rich small secreted protein CSS, putative	468.03	5	0	0.475307	0	2983	51	2220	68	2132	48	2445	54	7335	54
PVP01_1403100	protein UIS3, putative	951.983	5	0	0.817117	0	1586	118	783	227	798	175	1055.67	164	3167	164
PVP01_1404300	LisH domain-containing protein, putative	844.739	5	0	0.71273	0	1510	126	1098	166	765	185	1124.33	156	3373	156
PVP01_1405700	NLI interacting factor-like phosphatase, putative	947.997	5	0	0.57039	0	2802	56	2054	76	1302	89	2052.67	70	6158	70
PVP01_1405800	DNA-directed RNA polymerase II subunit RPB11, putative	153.64	5	0	0.46707	0	966	231	708	258	487	277	720.333	260	2161	260
PVP01_1411700	RNA-binding protein, putative	126.808	5	0	0.210601	0	3090	49	3282	41	2515	36	2962.33	44	8887	44
PVP01_1412400	AP-1 complex subunit mu-1, putative	94.1725	5	0	1.70887	0	198	614	NA	NA	NA	NA	198	717	198	830
PVP01_1412600	conserved Plasmodium protein, unknown function	398.754	5	0	0.61313	0	1142	185	657	278	540	259	779.667	241	2339	241
PVP01_1413500	conserved Plasmodium protein, unknown function	363.212	5	0	0.138928	0	7300	7	10003	4	5292	9	7531.67	7	22595	7
PVP01_1413800	eukaryotic translation initation factor 4 gamma, putative	963.148	5	0	0.620198	0	2287	76	1500	116	961	139	1582.67	95	4748	95
PVP01_1415400	transmembrane emp24 domain-containing protein, putative	116.862	5	0	0.828293	0	284	547	236	520	157	493	225.667	677	677	604
PVP01_1416300	zinc finger (CCCH type) protein, putative	217.156	5	0	0.806562	0	563	364	NA	NA	249	413	406	445	812	549
PVP01_1416800	exportin-T, putative	126.696	5	0	1.10871	0	680	314	618	289	576	241	624.667	292	1874	292
PVP01_1417000	inositol polyphosphate kinase, putative	90.4386	5	0	1.60155	0	163	640	117	615	129	518	136.333	815	409	710
PVP01_1417400	pre-mRNA-processing factor 40, putative	126.883	5	0	0.697651	0	314	524	212	537	154	496	226.667	676	680	603
PVP01_1418500	conserved Plasmodium protein, unknown function	87.391	5	0	0.616637	0	370	483	206	542	NA	NA	288	586	576	643
PVP01_1419200	conserved Plasmodium protein, unknown function	390.932	5	0	1.54989	0	678	315	386	411	425	305	496.333	363	1489	353
PVP01_1420300	conserved protein, unknown function	326.112	5	0	1.34501	0	743	287	437	376	416	308	532	339	1596	333
PVP01_1421400	ras-related protein Rab-11A, putative	150.302	5	0	0.889755	0	368	485	NA	NA	290	379	329	525	658	610
PVP01_1422700	ribosomal protein S5, mitochondrial, putative	192.294	5	0	0.759856	0	412	451	271	490	248	414	310.333	551	931	502
PVP01_1422800	conserved Plasmodium protein, unknown function	289.988	5	0	0.297223	0	3167	45	3511	37	2349	40	3009	43	9027	43
PVP01_1423300	conserved Plasmodium protein, unknown function	92.4335	5	0	1.06453	0	204	609	NA	NA	55	580	129.5	827	259	788
PVP01_1423600	transcription elongation factor s-II, putative	503.087	5	0	0.927633	0	1795	102	1202	150	1332	87	1443	112	4329	112
PVP01_1425700	conserved protein, unknown function	227.937	5	0	0.988857	0	1147	183	1539	112	1183	101	1289.67	129	3869	129
PVP01_1425800	conserved protein, unknown function	367.953	5	0	0.451069	0	1526	123	1313	134	1028	128	1289	130	3867	130
PVP01_1425900	phospholipase DDHD1, putative	134.276	5	0	0.526836	0	1100	194	1100	165	727	192	975.667	179	2927	179
PVP01_1426100	DNA/RNA-binding protein Alba 1, putative	220.212	5	0	0.899971	0	978	227	641	281	604	230	741	252	2223	252
PVP01_1427000	NPL domain-containing protein, putative	100.359	5	0	1.26467	0	304	531	193	552	167	485	221.333	684	664	609
PVP01_1427200	conserved Plasmodium protein, unknown function	243.708	5	0	0.754596	0	731	292	403	398	303	369	479	384	1437	370
PVP01_1427300	protein KIC7, putative	1610.81	5	0	0.65276	0	3384	42	2429	55	1841	52	2551.33	50	7654	50
PVP01_1427800	karyopherin alpha, putative	155.566	5	0	0.328462	0	1470	128	1546	110	856	163	1290.67	128	3872	128
PVP01_1427900	sporozoite surface protein 3, putative	658.384	5	0	1.66824	0	1060	206	790	224	1112	112	987.333	177	2962	177
PVP01_1428900	conserved protein, unknown function	126.281	5	0	1.83035	0	277	552	NA	NA	NA	NA	277	602	277	773
PVP01_1429400	conserved Plasmodium protein, unknown function	191.273	5	0	1.07187	0	530	381	332	447	379	326	413.667	436	1241	416
PVP01_1429700	ATP-dependent RNA helicase DBP1, putative	573.455	5	0	0.746637	0	1417	138	672	274	810	171	966.333	180	2899	180
PVP01_1430400	JmjC domain-containing protein 1, putative	173.059	5	0	1.03072	0	595	345	331	448	289	380	405	446	1215	423
PVP01_1430900	conserved protein, unknown function	126.007	5	0	0.790399	0	270	556	140	597	NA	NA	205	709	410	709
PVP01_1431800	bromodomain protein 2, putative	89.7154	5	0	0.320807	0	935	238	1002	175	558	251	831.667	220	2495	220
PVP01_1432200	kelch domain-containing protein, putative	612.801	5	0	0.64819	0	3052	50	3848	26	3409	19	3436.33	32	10309	32
PVP01_1435000	glycerol-3-phosphate dehydrogenase [NAD( )], putative	123.465	5	0	1.56903	0	264	562	NA	NA	NA	NA	264	621	264	783
PVP01_1435200	conserved Plasmodium protein, unknown function	128.174	5	0	0.404019	0	836	266	762	237	421	307	673	275	2019	275
PVP01_1435400	cell traversal protein for ookinetes and sporozoites	211.41	5	0	0.716556	0	1767	104	2287	63	1704	62	1919.33	74	5758	74
PVP01_1435700	DNA-binding chaperone, putative	165.991	5	0	0.711328	0	555	368	473	358	355	339	461	402	1383	386
PVP01_1436200	conserved protein, unknown function	474.486	5	0	0.533347	0	1305	149	971	180	914	150	1063.33	163	3190	163
PVP01_1436800	thrombospondin-related apical membrane protein	153.165	5	0	0.323024	0	1723	106	1798	83	1086	116	1535.67	100	4607	100
PVP01_1437000	symplekin domain-containing protein, putative	302.106	5	0	0.573747	0	857	260	707	259	516	268	693.333	266	2080	266
PVP01_1437200	triose or hexose phosphate/phosphate translocator, putative	230.824	5	0	0.515218	0	1001	223	768	235	614	225	794.333	234	2383	234
PVP01_1437800	formin 2, putative	360.868	5	0	0.64962	0	869	257	688	264	425	305	660.667	280	1982	280
PVP01_1438000	phospholipid-transporting ATPase 2, putative	257.779	5	0	0.525982	0	1027	215	816	217	561	249	801.333	228	2404	228
PVP01_1439100	conserved Plasmodium protein, unknown function	401.608	5	0	0.625573	0	1625	113	1216	146	1061	121	1300.67	126	3902	126
PVP01_1440200	conserved Plasmodium protein, unknown function	90.0617	5	0	0.25106	0	937	237	847	207	596	234	793.333	235	2380	235
PVP01_1440300	tRNA-splicing ligase RtcB, putative	191.031	5	0	0.597714	0	456	419	333	446	326	355	371.667	482	1115	452
PVP01_1440500	endoplasmin, putative	86.1098	5	0	0.20636	0	1526	123	1407	124	854	164	1262.33	134	3787	134
PVP01_1440800	AP2 domain transcription factor AP2-G, putative	105.535	5	0	0.614066	0	336	509	156	586	129	518	207	706	621	627
PVP01_1441500	DNA gyrase subunit A, putative	127.954	5	0	0.641844	0	301	534	279	486	170	482	250	638	750	572
PVP01_1441600	phospholipid-transporting ATPase, putative	543.213	5	0	0.891499	0	922	242	437	376	336	349	565	321	1695	318
PVP01_1445900	protein KIC2, putative	281.217	5	0	0.531846	0	914	245	717	253	598	233	743	251	2229	251
PVP01_1449200	conserved Plasmodium protein, unknown function	89.3449	5	0	1.98746	0	253	571	NA	NA	NA	NA	253	634	253	791
PVP01_1449600	amino acid transporter, putative	132.715	5	0	0.961009	0	466	413	399	401	379	326	414.667	434	1244	414
PVP01_1449800	pre-mRNA-splicing factor ATP-dependent RNA helicase PRP2, putative	120.367	5	0	0.401146	0	694	308	531	324	325	356	516.667	347	1550	340
PVP01_1450600	CWC16 domain-containing protein, putative	575.557	5	0	0.905671	0	823	268	495	344	335	350	551	325	1653	321
PVP01_1453200	conserved protein, unknown function	258.704	5	0	0.466951	0	3469	37	5157	16	3404	20	4010	20	12030	20
PVP01_1453400	CCR4-NOT transcription complex subunit 4, putative	151.372	5	0	1.14761	0	218	599	91	639	NA	NA	154.5	786	309	756
PVP01_1453500	tetQ family GTPase, putative	100.614	5	0	1.42258	0	221	596	NA	NA	NA	NA	221	685	221	815
PVP01_1454400	conserved protein, unknown function	201.166	5	0	0.870505	0	338	507	232	523	NA	NA	285	589	570	645
PVP01_1454900	protein-S-isoprenylcysteine O-methyltransferase, putative	207.087	5	0	1.0389	0	452	423	NA	NA	166	486	309	554	618	629
PVP01_1456000	conserved Plasmodium protein, unknown function	273.603	5	0	0.597643	0	894	249	525	329	308	366	575.667	316	1727	313
PVP01_1456100	COPI associated protein, putative	218.918	5	0	0.150867	0	5002	18	6169	9	4271	13	5147.33	12	15442	12
PVP01_1456400	pre-mRNA-splicing factor CWC22, putative	241.478	5	0	0.734746	0	524	385	300	469	301	371	375	476	1125	446
PVP01_1456600	conserved Plasmodium protein, unknown function	146.048	5	0	1.71414	0	343	504	NA	NA	NA	NA	343	516	343	739
PVP01_1457100	HD superfamily phosphohydrolase protein, putative	98.9585	5	0	0.825438	0	240	581	NA	NA	143	506	191.5	728	383	723
PVP01_1458900	ATP-dependent RNA helicase DBP9, putative	161.887	5	0	0.936687	0	260	566	186	558	NA	NA	223	683	446	693
PVP01_1459000	tetratricopeptide repeat protein, putative	156.075	5	0	0.544593	0	672	317	530	325	314	363	505.333	356	1516	347
PVP01_1460700	translation initiation factor SUI1, putative	1834.29	5	0	0.222351	0	9234	6	6930	6	5417	8	7193.67	8	21581	8
PVP01_1461000	double C2-like domain-containing protein, putative	168.969	5	0	0.816815	0	449	425	195	550	42	590	228.667	672	686	600
PVP01_1461200	N-alpha-acetyltransferase 15, NatA auxiliary subunit, putative	178.476	5	0	0.833827	0	455	420	191	554	NA	NA	323	534	646	615
PVP01_1461400	ACEA small nucleolar RNA U3	268.098	5	0	0.915729	0	1192	173	632	286	520	267	781.333	239	2344	239
PVP01_1461700	ADP-ribosylation factor GTPase-activating protein 1, putative	394.808	5	0	0.275739	0	4059	28	3663	34	2472	38	3398	34	10194	34
PVP01_1461800	conserved protein, unknown function	157.839	5	0	0.234301	0	2380	71	2383	60	1283	90	2015.33	71	6046	71
PVP01_1462800	epsin-like protein, putative	110.882	5	0	0.446445	0	688	309	624	288	426	304	579.333	314	1738	311
PVP01_1463200	actin, putative	571.537	5	0	0.909788	0	2432	68	2136	71	2548	35	2372	55	7116	55
PVP01_1463400	clathrin adaptor domain-containing protein, putative	91.1041	5	0	0.631883	0	259	567	112	620	109	534	160	777	480	678
PVP01_1464000	rac-beta serine/threonine protein kinase, putative	502.746	5	0	1.15357	0	1125	187	914	192	725	193	921.333	187	2764	187
PVP01_1464100	F-box only protein 9 homolog, putative	158.54	5	0	0.926334	0	403	459	369	421	308	366	360	495	1080	461
PVP01_1465600	bax inhibitor 1, putative	107.745	5	0	0.501169	0	731	292	706	260	610	227	682.333	271	2047	271
PVP01_1466400	protein phosphatase PPM4, putative	191.568	5	0	1.25527	0	360	490	183	560	NA	NA	271.5	609	543	655
PVP01_1466700	leucine-rich repeat protein	153.519	5	0	1.6212	0	340	505	NA	NA	NA	NA	340	519	340	740
PVP01_1466900	THO complex subunit 2, putative	132.256	5	0	0.796376	0	297	537	138	599	NA	NA	217.5	689	435	697
PVP01_1468200	conserved Plasmodium protein, unknown function	90.7645	5	0	0.477623	0	636	332	550	313	452	289	546	333	1638	328
PVP01_1468900	conserved Plasmodium protein, unknown function	89.5514	5	0	0.40381	0	454	421	374	417	250	412	359.333	497	1078	463
PVP01_0917400	heat shock protein 101, putative	89.9683	5	0	1.10197	0	NA	NA	299	470	240	421	269.5	613	539	656
PVP01_1238600	telomere length and silencing protein 1, putative	96.0818	5	0	1.98935	0	NA	NA	271	490	145	504	208	704	416	707
PVP01_API02800	elongation factor Tu, putative	112.821	5	0	1.03981	0	NA	NA	283	482	219	442	251	637	502	667
PVP01_0511300	serine/threonine protein kinase VPS15, putative	89.4274	5	0	5.03783	0	NA	NA	NA	NA	49	585	49	943	49	958
PVP01_0307900	sporozoite invasion-associated protein 1, putative	83.7722	5	1.11e-16	0.658928	2.79e-16	668	318	399	401	451	290	506	355	1518	346
PVP01_0946000	cysteine-rich PDZ-binding protein, putative	83.4018	5	1.11e-16	1.228	2.79e-16	166	637	NA	NA	NA	NA	166	768	166	856
PVP01_1002400	G-patch domain-containing protein, putative	83.5939	5	1.11e-16	1.49354	2.79e-16	187	621	NA	NA	NA	NA	187	735	187	839
PVP01_1022200	inositol-3-phosphate synthase, putative	84.092	5	1.11e-16	0.693205	2.79e-16	396	464	NA	NA	246	415	321	537	642	617
PVP01_1028500	DNA mismatch repair protein MSH6, putative	83.4653	5	1.11e-16	0.686062	2.79e-16	247	576	NA	NA	156	494	201.5	713	403	713
PVP01_1226200	conserved Plasmodium protein, unknown function	84.9877	5	1.11e-16	1.3348	2.79e-16	188	620	NA	NA	NA	NA	188	734	188	838
PVP01_1304100	conserved protein, unknown function	84.6166	5	1.11e-16	1.19257	2.79e-16	303	532	160	582	158	492	207	706	621	627
PVP01_1464200	conserved protein, unknown function	85.1826	5	1.11e-16	0.550101	2.79e-16	338	507	237	519	NA	NA	287.5	587	575	644
PVP01_0108100	ribosomal protein S8e, putative	82.9264	5	2.22e-16	1.77984	5.5e-16	353	495	348	437	207	453	302.667	564	908	512
PVP01_0308500	protein SOF1, putative	82.4932	5	2.22e-16	1.80975	5.5e-16	190	619	NA	NA	NA	NA	190	730	190	836
PVP01_0602900	conserved Plasmodium protein, unknown function	83.1217	5	2.22e-16	0.627594	5.5e-16	292	540	157	585	NA	NA	224.5	681	449	691
PVP01_0928900	prefoldin subunit 5, putative	82.6697	5	2.22e-16	1.42587	5.5e-16	162	641	NA	NA	NA	NA	162	774	162	859
PVP01_1130100	cell division cycle protein 48 homologue, putative	83.2454	5	2.22e-16	1.49074	5.5e-16	202	611	127	608	NA	NA	164.5	771	329	744
PVP01_1146200	conserved Plasmodium protein, unknown function	83.1588	5	2.22e-16	1.57111	5.5e-16	160	643	NA	NA	NA	NA	160	777	160	861
PVP01_1245400	MORN repeat protein, putative	83.1355	5	2.22e-16	1.00056	5.5e-16	362	489	757	241	664	210	594.333	304	1783	302
PVP01_1306100	conserved Plasmodium protein, unknown function	82.6131	5	2.22e-16	3.2601	5.5e-16	165	638	69	655	69	570	101	871	303	761
PVP01_1467700	translation initiation factor eIF-2B subunit beta, putative	83.3498	5	2.22e-16	0.530716	5.5e-16	403	459	NA	NA	244	417	323.5	532	647	614
PVP01_1014400	CCR4 domain-containing protein 1, putative	82.2715	5	3.33e-16	1.37865	8.22e-16	127	664	56	667	NA	NA	91.5	884	183	841
PVP01_1404900	condensin complex subunit 2, putative	81.8737	5	3.33e-16	0.420844	8.22e-16	559	365	525	329	356	338	480	382	1440	368
PVP01_0714400	major facilitator superfamily domain-containing protein, putative	81.1982	5	4.44e-16	0.603629	1.09e-15	195	616	242	516	116	529	184.333	739	553	652
PVP01_1425600	conserved Plasmodium protein, unknown function	81.2835	5	4.44e-16	0.943401	1.09e-15	380	476	478	354	282	386	380	470	1140	440
PVP01_0724400	parasitophorous vacuolar protein 5, putative	80.8012	5	5.55e-16	1.19777	1.36e-15	219	598	330	449	158	492	235.667	657	707	588
PVP01_1139800	zinc transporter ZIP1, putative	80.819	5	5.55e-16	0.556819	1.36e-15	575	356	543	316	369	332	495.667	364	1487	354
PVP01_1263200	pre-mRNA-splicing factor CWC24, putative	80.7903	5	5.55e-16	0.595396	1.36e-15	652	326	443	373	239	422	444.667	414	1334	397
PVP01_0822900	cdc2-related protein kinase 4, putative	80.6066	5	6.66e-16	0.715895	1.63e-15	232	587	135	601	NA	NA	183.5	741	367	728
PVP01_0729600	NifU-like protein, putative	80.2596	5	7.77e-16	0.251471	1.89e-15	1431	135	1518	114	1261	94	1403.33	118	4210	118
PVP01_0521200	GTP-binding protein, putative	79.8333	5	8.88e-16	0.954083	2.15e-15	333	510	238	518	192	463	254.333	633	763	569
PVP01_1118100	ER lumen protein retaining receptor, putative	79.8389	5	8.88e-16	0.863183	2.15e-15	332	511	249	510	197	460	259.333	628	778	563
PVP01_1253100	conserved Plasmodium protein, unknown function	79.9561	5	8.88e-16	0.878611	2.15e-15	218	599	188	556	119	527	175	753	525	662
PVP01_0320000	ubiquinone biosynthesis O-methyltransferase, putative	79.5643	5	9.99e-16	1.61376	2.41e-15	158	645	NA	NA	NA	NA	158	782	158	863
PVP01_1256900	signal recognition particle subunit SRP54, putative	79.7335	5	9.99e-16	1.43352	2.41e-15	188	620	NA	NA	NA	NA	188	734	188	838
PVP01_1312300	ribonucleoside-diphosphate reductase large subunit, putative	79.6934	5	9.99e-16	1.24571	2.41e-15	158	645	NA	NA	NA	NA	158	782	158	863
PVP01_1031400	merozoite surface protein 3	79.0932	5	1.33e-15	2.07241	3.21e-15	233	586	NA	NA	NA	NA	233	662	233	805
PVP01_0701700	conserved protein, unknown function	78.5365	5	1.67e-15	0.605171	4e-15	605	341	517	333	381	324	501	359	1503	350
PVP01_0933600	aquaglyceroporin, putative	78.3881	5	1.78e-15	0.925935	4.25e-15	500	395	1119	161	758	187	792.333	236	2377	236
PVP01_1212700	iron regulatory protein, putative	78.3872	5	1.78e-15	0.435922	4.25e-15	1030	214	1198	151	903	154	1043.67	166	3131	166
PVP01_1239900	conserved Plasmodium protein, unknown function	78.3972	5	1.78e-15	1.58347	4.25e-15	159	644	NA	NA	NA	NA	159	779	159	862
PVP01_0806600	PPPDE peptidase, putative	78.2909	5	1.89e-15	0.680431	4.51e-15	486	402	378	415	NA	NA	432	422	864	530
PVP01_0905000	chromatin remodeling protein, putative	78.0839	5	2.11e-15	0.604229	5.03e-15	304	531	211	538	128	519	214.333	694	643	616
PVP01_1125500	hexokinase, putative	77.8088	5	2.44e-15	0.626784	5.81e-15	678	315	562	307	399	315	546.333	332	1639	327
PVP01_1025600	conserved protein, unknown function	77.3269	5	3e-15	1.68807	7.1e-15	160	643	NA	NA	NA	NA	160	777	160	861
PVP01_1203000	conserved Plasmodium protein, unknown function	77.358	5	3e-15	0.382486	7.1e-15	2423	69	2485	51	1542	76	2150	67	6450	67
PVP01_1220700	RING zinc finger protein, putative	77.3686	5	3e-15	1.66227	7.1e-15	175	630	NA	NA	NA	NA	175	753	175	847
PVP01_0915000	GTPase-activating protein, putative	77.0396	5	3.44e-15	0.630602	8.13e-15	367	486	205	543	133	515	235	658	705	589
PVP01_0701400	conserved protein, unknown function	76.9498	5	3.66e-15	0.74366	8.63e-15	417	447	393	406	331	352	380.333	469	1141	439
PVP01_1306400	LIMP protein, putative	76.9641	5	3.66e-15	0.917696	8.63e-15	255	570	NA	NA	245	416	250	638	500	668
PVP01_1126600	AP2 domain transcription factor AP2Tel, putative	76.8111	5	3.89e-15	0.697492	9.13e-15	211	603	157	585	NA	NA	184	740	368	727
PVP01_1017300	ubiquitin carboxyl-terminal hydrolase 2, putative	76.4701	5	4.55e-15	0.637424	1.07e-14	244	578	NA	NA	190	465	217	690	434	698
PVP01_1265200	vacuolar protein sorting-associated protein 60, putative	76.2731	5	5e-15	0.31986	1.17e-14	604	342	474	357	370	331	482.667	376	1448	365
PVP01_0918800	heat shock protein 90, putative	76.235	5	5.11e-15	1.61207	1.19e-14	164	639	97	633	191	464	150.667	793	452	688
PVP01_0508900	ATP synthase-associated protein, putative	76.1788	5	5.33e-15	1.06021	1.24e-14	179	627	140	597	NA	NA	159.5	778	319	750
PVP01_0315800	pre-rRNA-processing protein ESF2, putative	76.1054	5	5.44e-15	0.335848	1.27e-14	622	337	375	416	291	378	429.333	424	1288	406
PVP01_1307300	cysteine repeat modular protein 3, putative	76.1219	5	5.44e-15	3.96449	1.27e-14	52	726	21	689	52	582	41.6667	952	125	890
PVP01_1012600	zinc finger protein, putative	76.0626	5	5.55e-15	0.685904	1.29e-14	390	468	175	568	677	206	414	435	1242	415
PVP01_0945300	transcription initiation factor IIF subunit beta, putative	75.9601	5	5.88e-15	1.35305	1.36e-14	150	650	NA	NA	NA	NA	150	794	150	867
PVP01_1430000	protein phosphatase PPM5, putative	75.9106	5	6e-15	1.79181	1.39e-14	145	653	132	603	126	520	134.333	819	403	713
PVP01_1340900	plasmepsin IV, putative	75.7566	5	6.44e-15	0.958044	1.49e-14	391	467	408	394	324	357	374.333	478	1123	448
PVP01_0210500	StAR-related lipid transfer protein, putative	75.5111	5	7.33e-15	1.16186	1.69e-14	150	650	NA	NA	NA	NA	150	794	150	867
PVP01_0421000	Sel1 repeat-containing protein, putative	75.486	5	7.33e-15	0.413449	1.69e-14	653	325	487	348	468	282	536	337	1608	331
PVP01_1315200	Hsp70/Hsp90 organizing protein, putative	75.4916	5	7.33e-15	0.852433	1.69e-14	730	293	539	318	376	327	548.333	329	1645	324
PVP01_1325800	cyclophilin, putative	75.2267	5	8.33e-15	1.00726	1.91e-14	876	254	984	179	608	229	822.667	223	2468	223
PVP01_0212300	conserved Plasmodium protein, unknown function	74.9853	5	9.33e-15	0.835225	2.14e-14	198	614	NA	NA	80	562	139	810	278	772
PVP01_0807400	AP2 domain transcription factor AP2-I, putative	74.858	5	9.99e-15	1.46925	2.29e-14	NA	NA	233	522	NA	NA	233	662	233	805
PVP01_1011100	pre-mRNA-splicing factor BUD31, putative	74.4444	5	1.21e-14	1.27242	2.77e-14	159	644	NA	NA	NA	NA	159	779	159	862
PVP01_1212200	myosin A, putative	74.1558	5	1.4e-14	0.216936	3.19e-14	1202	169	857	204	744	189	934.333	186	2803	186
PVP01_1468000	conserved protein, unknown function	73.9078	5	1.58e-14	0.603124	3.59e-14	416	448	312	461	NA	NA	364	491	728	579
PVP01_0814000	translation initiation factor eIF-2B subunit delta, putative	73.5004	5	1.91e-14	0.492636	4.34e-14	399	462	289	477	NA	NA	344	512	688	598
PVP01_1030700	hypothetical protein	73.2517	5	2.15e-14	1.51111	4.89e-14	165	638	NA	NA	NA	NA	165	770	165	857
PVP01_1203300	60S ribosomal protein L17, putative	73.2249	5	2.19e-14	2.09924	4.96e-14	240	581	123	612	NA	NA	181.5	745	363	730
PVP01_1442400	BRO1 domain-containing protein, putative	73.1004	5	2.32e-14	0.698042	5.25e-14	461	416	348	437	346	344	385	463	1155	435
PVP01_1330900	ubiquitin fusion degradation protein 1, putative	73.0203	5	2.41e-14	0.359863	5.44e-14	540	377	349	436	238	423	375.667	474	1127	444
PVP01_1455600	conserved Plasmodium protein, unknown function	73.0043	5	2.43e-14	1.08002	5.48e-14	179	627	NA	NA	NA	NA	179	749	179	844
PVP01_1103100	conserved protein, unknown function	72.976	5	2.45e-14	0.42961	5.52e-14	563	364	169	574	233	428	321.667	536	965	493
PVP01_1117200	60S ribosomal protein L7-2, putative	72.1788	5	3.61e-14	2.24682	8.11e-14	221	596	NA	NA	NA	NA	221	685	221	815
PVP01_1447500	macrophage migration inhibitory factor, putative	72.1085	5	3.73e-14	0.627621	8.37e-14	719	298	250	509	476	281	481.667	378	1445	366
PVP01_0106600	60S ribosomal protein L37, putative	72.0775	5	3.79e-14	1.79274	8.48e-14	253	571	305	466	184	470	247.333	641	742	573
PVP01_1326500	ERAD-associated E3 ubiquitin-protein ligase HRD1, putative	71.5775	5	4.81e-14	0.441117	1.08e-13	1048	211	877	200	712	198	879	204	2637	204
PVP01_0304400	ATP-dependent RNA helicase DDX51, putative	71.5182	5	4.95e-14	1.46216	1.11e-13	158	645	NA	NA	NA	NA	158	782	158	863
PVP01_1225700	transcriptional regulatory protein sir2a, putative	70.6931	5	7.35e-14	0.768478	1.64e-13	666	319	356	431	305	367	442.333	416	1327	399
PVP01_1009700	conserved Plasmodium protein, unknown function	70.6856	5	7.38e-14	1.9509	1.64e-13	272	554	424	383	303	369	333	523	999	482
PVP01_1103600	ribosomal protein L1, putative	70.5963	5	7.7e-14	0.445122	1.71e-13	571	359	451	368	369	332	463.667	397	1391	382
PVP01_0616100	ookinete surface protein P25	70.4711	5	8.17e-14	1.58068	1.81e-13	27	742	52	671	84	558	54.3333	935	163	858
PVP01_0416300	acyl carrier protein, putative	69.592	5	1.25e-13	1.26078	2.76e-13	269	557	191	554	186	469	215.333	693	646	615
PVP01_0508800	protein KRI1, putative	69.578	5	1.25e-13	2.14018	2.78e-13	192	617	NA	NA	NA	NA	192	727	192	834
PVP01_0943600	conserved Plasmodium protein, unknown function	69.0644	5	1.6e-13	0.869212	3.54e-13	325	517	401	400	387	320	371	484	1113	454
PVP01_1129300	conserved Plasmodium protein, unknown function	68.9311	5	1.71e-13	0.682923	3.77e-13	886	253	987	178	847	165	906.667	192	2720	192
PVP01_0303300	conserved Plasmodium protein, unknown function	68.8674	5	1.76e-13	0.509515	3.88e-13	855	261	673	273	604	230	710.667	262	2132	262
PVP01_1120300	DnaJ protein, putative	68.7282	5	1.88e-13	0.754991	4.14e-13	544	374	436	377	278	390	419.333	430	1258	411
PVP01_1215200	conserved Plasmodium protein, unknown function	68.5125	5	2.09e-13	0.316283	4.59e-13	758	284	507	337	541	258	602	302	1806	300
PVP01_0905800	histone H4, putative	68.1531	5	2.48e-13	1.11913	5.44e-13	151	649	145	594	138	510	144.667	803	434	698
PVP01_1202900	conserved protein, unknown function	67.79	5	2.95e-13	0.302274	6.46e-13	699	305	572	305	399	315	556.667	323	1670	319
PVP01_0941400	chromo domain-containing protein, putative	67.7735	5	2.98e-13	0.915433	6.5e-13	163	640	NA	NA	79	563	121	842	242	799
PVP01_1019400	conserved Plasmodium protein, unknown function	67.674	5	3.12e-13	1.17174	6.81e-13	140	658	NA	NA	NA	NA	140	809	140	876
PVP01_0520900	conserved Plasmodium protein, unknown function	67.6156	5	3.21e-13	1.09642	6.99e-13	431	439	323	455	494	274	416	433	1248	413
PVP01_1012300	conserved Plasmodium protein, unknown function	67.5271	5	3.35e-13	3.26121	7.28e-13	65	715	71	653	159	491	98.3333	875	295	766
PVP01_1129100	merozoite surface protein 10, putative	67.2441	5	3.83e-13	0.887192	8.32e-13	472	411	387	410	232	429	363.667	492	1091	458
PVP01_0706300	ribosomal protein L35, apicoplast, putative	66.8122	5	4.71e-13	0.488397	1.02e-12	394	465	NA	NA	668	209	531	340	1062	467
PVP01_0701900	nucleoporin NUP138, putative	66.8075	5	4.72e-13	0.431223	1.02e-12	401	460	263	498	202	457	288.667	584	866	528
PVP01_1403500	deoxyhypusine hydroxylase	66.568	5	5.3e-13	1.59524	1.14e-12	143	655	NA	NA	NA	NA	143	805	143	873
PVP01_1412500	26S protease regulatory subunit 7, putative	66.3895	5	5.77e-13	0.369275	1.24e-12	394	465	280	485	329	353	334.333	522	1003	481
PVP01_1320900	protein kinase, putative	66.3331	5	5.93e-13	1.28451	1.28e-12	132	660	48	675	NA	NA	90	886	180	843
PVP01_1026100	conserved Plasmodium protein, unknown function	66.1917	5	6.34e-13	0.134438	1.36e-12	1629	112	1753	90	1006	130	1462.67	107	4388	107
PVP01_1456200	calcyclin binding protein, putative	66.1441	5	6.49e-13	0.51847	1.39e-12	981	226	960	181	718	197	886.333	202	2659	202
PVP01_1145300	AT-rich interactive domain-containing protein, putative	66.038	5	6.82e-13	0.612746	1.46e-12	357	492	284	481	NA	NA	320.5	539	641	618
PVP01_0421200	5'-3' exonuclease, putative	66.0006	5	6.95e-13	0.422423	1.49e-12	338	507	255	505	226	435	273	608	819	548
PVP01_0717400	nucleosome assembly protein 1, putative	65.8924	5	7.32e-13	0.611887	1.56e-12	1347	145	1480	117	768	183	1198.33	146	3595	146
PVP01_0946800	PH-like domain-containing protein, putative	65.8913	5	7.32e-13	1.63948	1.56e-12	128	663	NA	NA	NA	NA	128	831	128	887
PVP01_1341300	conserved Plasmodium protein, unknown function	65.8152	5	7.59e-13	0.480236	1.62e-12	338	507	252	508	NA	NA	295	575	590	639
PVP01_1135400	syntaxin-binding protein, putative	65.812	5	7.6e-13	0.756035	1.62e-12	197	615	NA	NA	88	554	142.5	806	285	770
PVP01_1301400	SRAP domain-containing protein, putative	65.4307	5	9.12e-13	1.21884	1.94e-12	97	688	76	649	62	576	78.3333	901	235	804
PVP01_0526800	conserved Plasmodium protein, unknown function	65.3998	5	9.26e-13	0.849822	1.96e-12	152	648	NA	NA	75	565	113.5	852	227	809
PVP01_0807300	conserved protein, unknown function	65.205	5	1.02e-12	0.240422	2.15e-12	1664	110	2228	67	1179	102	1690.33	86	5071	86
PVP01_0409400	conserved Plasmodium protein, unknown function	65.1563	5	1.04e-12	0.332766	2.2e-12	596	344	447	371	347	343	463.333	398	1390	383
PVP01_0820600	elongation factor 1-delta, putative	64.6728	5	1.31e-12	1.6014	2.77e-12	146	652	NA	NA	NA	NA	146	800	146	871
PVP01_1016000	zinc finger protein, putative	64.5155	5	1.41e-12	3.22639	2.98e-12	209	605	NA	NA	NA	NA	209	703	209	822
PVP01_1248600	alpha/beta hydrolase, putative	64.3058	5	1.56e-12	2.21849	3.29e-12	210	604	NA	NA	NA	NA	210	702	210	821
PVP01_1467800	transcription initiation factor IIA subunit 2, putative	64.1734	5	1.66e-12	0.53111	3.49e-12	319	521	166	576	NA	NA	242.5	647	485	674
PVP01_0938100	apical exonemal protein, putative	64.1102	5	1.71e-12	0.522308	3.6e-12	283	548	168	575	NA	NA	225.5	678	451	689
PVP01_1461500	RNA-binding protein, putative	64.0474	5	1.77e-12	1.95759	3.7e-12	103	683	37	681	36	596	58.6667	928	176	846
PVP01_1437400	arginine--tRNA ligase, putative	63.9878	5	1.82e-12	0.806788	3.8e-12	551	370	411	392	NA	NA	481	379	962	494
PVP01_1124700	conserved Plasmodium protein, unknown function	63.9821	5	1.82e-12	4.02925	3.81e-12	80	704	26	687	92	550	66	916	198	830
PVP01_1232900	splicing factor 1, putative	63.8803	5	1.91e-12	0.878876	3.99e-12	403	459	266	495	267	398	312	549	936	500
PVP01_1227700	conserved Apicomplexan protein, unknown function	63.8148	5	1.97e-12	0.338811	4.11e-12	370	483	435	378	323	358	376	473	1128	443
PVP01_1146300	SAC3 domain-containing protein, putative	63.7134	5	2.07e-12	1.85176	4.31e-12	163	640	NA	NA	NA	NA	163	773	163	858
PVP01_0607900	phospholipid scramblase, putative	63.4425	5	2.36e-12	0.279863	4.89e-12	1413	139	1797	84	949	140	1386.33	121	4159	121
PVP01_0828900	phosphatidylinositol 3- and 4-kinase, putative	63.4061	5	2.4e-12	1.11046	4.97e-12	324	518	214	536	144	505	227.333	674	682	602
PVP01_1217800	tryptophan--tRNA ligase, putative	63.3774	5	2.43e-12	0.639621	5.03e-12	287	545	203	545	193	462	227.667	673	683	601
PVP01_0521000	RNA-binding protein, putative	63.2967	5	2.53e-12	0.6831	5.22e-12	247	576	NA	NA	188	467	217.5	689	435	697
PVP01_0521300	conserved Plasmodium protein, unknown function	63.2229	5	2.62e-12	1.63378	5.4e-12	150	650	NA	NA	NA	NA	150	794	150	867
PVP01_0708800	conserved protein, unknown function	63.1202	5	2.75e-12	1.09529	5.67e-12	122	667	NA	NA	NA	NA	122	840	122	893
PVP01_1123100	CRAL/TRIO domain-containing protein, putative	63.0003	5	2.91e-12	0.794386	5.99e-12	498	396	774	231	458	287	576.667	315	1730	312
PVP01_0914000	conserved Plasmodium protein, unknown function	62.8661	5	3.1e-12	0.3618	6.38e-12	NA	NA	789	225	373	329	581	312	1162	433
PVP01_1230300	conserved Plasmodium protein, unknown function	62.7211	5	3.33e-12	1.68996	6.82e-12	149	651	NA	NA	NA	NA	149	795	149	868
PVP01_0813100	zinc finger protein, putative	62.4077	5	3.86e-12	0.215297	7.91e-12	1309	148	1108	163	876	159	1097.67	158	3293	158
PVP01_0719400	ubiquitin-conjugating enzyme E2, putative	62.3849	5	3.9e-12	0.599753	7.99e-12	268	558	270	491	461	286	333	523	999	482
PVP01_0602400	enoyl-CoA hydratase-related protein, putative	62.3512	5	3.97e-12	0.422819	8.1e-12	288	544	302	467	119	527	236.333	656	709	587
PVP01_1415800	TFIIH basal transcription factor subunit, putative	62.2676	5	4.13e-12	0.69294	8.42e-12	218	599	195	550	NA	NA	206.5	707	413	708
PVP01_1006300	Hsc70-interacting protein, putative	62.2399	5	4.18e-12	1.36743	8.52e-12	207	606	132	603	NA	NA	169.5	763	339	741
PVP01_1242500	conserved Plasmodium protein, unknown function	62.0707	5	4.53e-12	1.74767	9.22e-12	151	649	NA	NA	NA	NA	151	792	151	866
PVP01_1245200	splicing factor 3B subunit 2, putative	62.0563	5	4.57e-12	1.10489	9.27e-12	211	603	166	576	NA	NA	188.5	733	377	725
PVP01_1262200	fructose 1,6-bisphosphate aldolase, putative	61.815	5	5.12e-12	0.397379	1.04e-11	1367	143	1357	128	1059	122	1261	136	3783	136
PVP01_0717500	DnaJ protein, putative	61.5284	5	5.87e-12	0.570503	1.19e-11	451	424	384	412	283	385	372.667	479	1118	449
PVP01_1130500	conserved protein, unknown function	61.5259	5	5.88e-12	0.718609	1.19e-11	447	427	314	460	260	403	340.333	518	1021	477
PVP01_1218000	parasitophorous vacuolar protein 3, putative	61.3704	5	6.33e-12	0.326714	1.28e-11	511	391	584	302	282	386	459	404	1377	388
PVP01_0947900	conserved Plasmodium protein, unknown function	61.2679	5	6.65e-12	1.30814	1.34e-11	108	678	66	658	NA	NA	87	889	174	848
PVP01_1011600	18S rRNA (guanine-N(7))-methyltransferase, putative	61.267	5	6.65e-12	1.48612	1.34e-11	131	661	NA	NA	NA	NA	131	825	131	885
PVP01_0607500	ZIP domain-containing protein, putative	61.2325	5	6.76e-12	1.43168	1.36e-11	NA	NA	161	581	267	398	214	695	428	699
PVP01_1455000	conserved Plasmodium protein, unknown function	60.9819	5	7.62e-12	0.942513	1.53e-11	852	262	727	250	437	298	672	276	2016	276
PVP01_0212900	cysteine desulfurase IscS, putative	60.8979	5	7.93e-12	0.37067	1.59e-11	723	296	832	211	549	255	701.333	265	2104	265
PVP01_1422100	conserved Plasmodium protein, unknown function	60.7831	5	8.37e-12	0.764277	1.68e-11	167	636	95	635	85	557	115.667	848	347	737
PVP01_1407600	conserved Plasmodium protein, unknown function	60.701	5	8.71e-12	0.528748	1.74e-11	243	579	164	578	169	483	192	727	576	643
PVP01_1314000	clathrin light chain, putative	60.6812	5	8.79e-12	1.84669	1.75e-11	140	658	NA	NA	NA	NA	140	809	140	876
PVP01_0104300	basal complex transmembrane protein 2, putative	60.5477	5	9.37e-12	0.936575	1.87e-11	180	626	130	605	96	546	135.333	816	406	712
PVP01_1005600	eukaryotic translation initiation factor 3 subunit E, putative	60.4947	5	9.6e-12	0.643419	1.91e-11	198	614	119	614	NA	NA	158.5	781	317	752
PVP01_1260400	centrin-2, putative	60.4784	5	9.68e-12	0.406366	1.92e-11	1289	154	1662	98	1348	85	1433	113	4299	113
PVP01_1210700	TLD domain-containing protein, putative	60.4537	5	9.79e-12	1.37017	1.94e-11	128	663	NA	NA	79	563	103.5	868	207	824
PVP01_0602200	DNA polymerase delta catalytic subunit, putative	60.1564	5	1.13e-11	0.364025	2.24e-11	579	353	520	331	NA	NA	549.5	327	1099	456
PVP01_1117300	adenylosuccinate synthetase, putative	59.9807	5	1.23e-11	1.06428	2.43e-11	128	663	NA	NA	98	544	113	853	226	810
PVP01_1133700	ribonuclease, putative	59.85	5	1.31e-11	0.952439	2.58e-11	NA	NA	244	514	324	357	284	590	568	646
PVP01_0830000	phd finger protein, putative	59.5648	5	1.5e-11	2.30622	2.95e-11	231	588	NA	NA	NA	NA	231	667	231	806
PVP01_0618300	early transcribed membrane protein	59.424	5	1.6e-11	1.38781	3.15e-11	141	657	NA	NA	58	578	99.5	873	199	829
PVP01_0813500	conserved Plasmodium protein, unknown function	58.8757	5	2.07e-11	0.872516	4.08e-11	261	565	129	606	199	459	196.333	722	589	640
PVP01_1321900	conserved Plasmodium protein, unknown function	58.8122	5	2.14e-11	0.557109	4.2e-11	223	594	86	642	126	520	145	802	435	697
PVP01_0105500	origin recognition complex subunit 2, putative	58.4809	5	2.5e-11	1.55102	4.91e-11	121	668	NA	NA	NA	NA	121	842	121	894
PVP01_1410700	vacuolar protein sorting-associated protein 18, putative	58.3008	5	2.73e-11	0.979984	5.34e-11	161	642	NA	NA	NA	NA	161	775	161	860
PVP01_1404700	conserved Plasmodium protein, unknown function	58.2502	5	2.79e-11	1.74505	5.46e-11	80	704	59	665	56	579	65	919	195	832
PVP01_1315600	protein kinase, putative	58.0915	5	3.01e-11	1.02533	5.88e-11	295	538	261	500	135	513	230.333	669	691	597
PVP01_0724700	conserved Plasmodium protein, unknown function	58.0323	5	3.1e-11	0.826394	6.04e-11	234	585	147	592	270	396	217	690	651	611
PVP01_1017600	phosducin-like protein 1, putative	57.6783	5	3.66e-11	0.410735	7.14e-11	520	387	497	343	NA	NA	508.5	351	1017	479
PVP01_MIT02700	cytochrome oxidase subunit 3	57.6624	5	3.69e-11	1.04925	7.18e-11	185	623	132	603	249	413	188.667	732	566	647
PVP01_0733200	V-type proton ATPase subunit E, putative	57.6462	5	3.72e-11	0.269768	7.23e-11	784	279	733	248	401	314	639.333	287	1918	287
PVP01_0618400	conserved protein, unknown function	57.4988	5	3.99e-11	0.534113	7.74e-11	1665	109	1668	97	1045	125	1459.33	108	4378	108
PVP01_1025000	alpha-soluble NSF attachment protein, putative	57.4197	5	4.14e-11	0.473083	8.03e-11	339	506	NA	NA	255	407	297	572	594	636
PVP01_1140500	conserved Plasmodium protein, unknown function	57.1534	5	4.7e-11	1.33518	9.1e-11	119	670	NA	NA	NA	NA	119	844	119	896
PVP01_0710500	conserved Plasmodium protein, unknown function	57.068	5	4.9e-11	0.456693	9.46e-11	346	501	210	539	242	419	266	616	798	553
PVP01_1457900	conserved Plasmodium protein, unknown function	56.8652	5	5.39e-11	1.94752	1.04e-10	123	666	64	660	NA	NA	93.5	881	187	839
PVP01_0906400	translocon component PTEX88, putative	56.8082	5	5.54e-11	1.43261	1.07e-10	120	669	NA	NA	NA	NA	120	843	120	895
PVP01_0617300	conserved Plasmodium protein, unknown function	56.724	5	5.76e-11	0.701375	1.11e-10	257	569	NA	NA	138	510	197.5	719	395	715
PVP01_0216200	conserved Plasmodium protein, unknown function	56.4541	5	6.55e-11	0.792539	1.26e-10	253	571	183	560	140	509	192	727	576	643
PVP01_1346800	conserved Plasmodium protein, unknown function	56.2233	5	7.31e-11	1.23335	1.4e-10	149	651	NA	NA	93	549	121	842	242	799
PVP01_1459600	conserved protein, unknown function	56.1992	5	7.39e-11	0.693643	1.42e-10	175	630	82	645	122	524	126.333	834	379	724
PVP01_0908600	AP2 domain transcription factor, putative	56.0148	5	8.07e-11	0.405319	1.54e-10	383	473	337	443	NA	NA	360	495	720	582
PVP01_0823200	E3 ubiquitin-protein ligase, putative	55.8727	5	8.63e-11	0.358653	1.65e-10	371	482	354	433	191	464	305.333	560	916	509
PVP01_1458000	vacuolar protein sorting-associated protein 16, putative	55.8089	5	8.9e-11	1.67407	1.7e-10	121	668	NA	NA	NA	NA	121	842	121	894
PVP01_1246800	FYVE and coiled-coil domain-containing protein, putative	55.7297	5	9.24e-11	0.258348	1.76e-10	741	288	770	233	431	301	647.333	284	1942	284
PVP01_1341100	conserved Plasmodium protein, unknown function	55.6283	5	9.69e-11	1.61054	1.84e-10	127	664	NA	NA	NA	NA	127	832	127	888
PVP01_1240700	protein phosphatase containing kelch-like domains, putative	55.5058	5	1.03e-10	0.512274	1.95e-10	432	438	379	414	220	441	343.667	513	1031	475
PVP01_0924200	RAP protein, putative	55.4872	5	1.04e-10	1.19507	1.97e-10	183	624	86	642	NA	NA	134.5	818	269	778
PVP01_1317200	conserved Plasmodium protein, unknown function	55.4334	5	1.06e-10	0.671453	2.01e-10	151	649	42	679	89	553	94	880	282	771
PVP01_1021700	CDK-activating kinase assembly factor MAT1, putative	55.4193	5	1.07e-10	0.358074	2.02e-10	494	398	307	464	265	400	355.333	501	1066	465
PVP01_0726650	conserved Plasmodium protein, unknown function	55.1371	5	1.22e-10	0.594992	2.31e-10	346	501	NA	NA	216	445	281	596	562	648
PVP01_0418300	merozoite surface protein 4	55.1283	5	1.23e-10	0.738126	2.32e-10	411	452	490	347	339	347	413.333	437	1240	417
PVP01_0913900	protein tyrosine phosphatase, putative	54.9112	5	1.36e-10	0.77357	2.57e-10	292	540	280	485	191	464	254.333	633	763	569
PVP01_0409600	conserved Plasmodium protein, unknown function	54.8957	5	1.37e-10	0.980099	2.58e-10	297	537	259	502	136	512	230.667	668	692	596
PVP01_1122400	ankyrin-repeat protein, putative	54.8245	5	1.42e-10	2.07669	2.67e-10	150	650	NA	NA	NA	NA	150	794	150	867
PVP01_1431600	eukaryotic translation initiation factor 3 subunit A, putative	54.4981	5	1.66e-10	1.41833	3.11e-10	75	709	71	653	51	583	65.6667	917	197	831
PVP01_1420000	ubiquitin carboxyl-terminal hydrolase MINDY, putative	54.3624	5	1.77e-10	1.31463	3.31e-10	209	605	296	472	189	466	231.333	666	694	595
PVP01_1437100	AP-2 complex subunit mu, putative	54.3292	5	1.79e-10	0.760633	3.36e-10	294	539	230	525	156	494	226.667	676	680	603
PVP01_1454700	p25-alpha family protein, putative	54.2453	5	1.87e-10	0.638999	3.49e-10	721	297	1106	164	770	182	865.667	208	2597	208
PVP01_1206600	step II splicing factor, putative	54.09	5	2.01e-10	0.19076	3.75e-10	1010	221	959	182	642	217	870.333	206	2611	206
PVP01_1205300	conserved Plasmodium protein, unknown function	54.0666	5	2.03e-10	2.22422	3.79e-10	175	630	NA	NA	NA	NA	175	753	175	847
PVP01_0823100	proteasome subunit alpha type-3, putative	53.953	5	2.14e-10	0.393321	3.99e-10	453	422	372	419	NA	NA	412.5	438	825	545
PVP01_1334300	mRNA-capping enzyme subunit alpha, putative	53.9362	5	2.16e-10	2.11694	4.02e-10	161	642	NA	NA	NA	NA	161	775	161	860
PVP01_1315300	calmodulin, putative	53.8791	5	2.22e-10	0.489395	4.12e-10	1454	131	1836	82	994	133	1428	116	4284	116
PVP01_0302600	conserved Plasmodium protein, unknown function	53.8166	5	2.29e-10	1.08617	4.24e-10	86	698	49	674	NA	NA	67.5	914	135	881
PVP01_1343800	conserved Plasmodium protein, unknown function	53.7731	5	2.33e-10	0.620692	4.32e-10	199	613	220	532	174	478	197.667	718	593	637
PVP01_1417200	conserved Plasmodium protein, unknown function	53.575	5	2.56e-10	0.940501	4.74e-10	262	564	257	503	222	439	247	642	741	574
PVP01_1111000	protein arginine N-methyltransferase 5, putative	53.5154	5	2.64e-10	1.64037	4.87e-10	121	668	NA	NA	NA	NA	121	842	121	894
PVP01_1130400	conserved Plasmodium protein, unknown function	53.2775	5	2.95e-10	1.57821	5.44e-10	109	677	NA	NA	NA	NA	109	859	109	903
PVP01_0708100	conserved protein, unknown function	53.2224	5	3.03e-10	0.986935	5.58e-10	268	558	116	616	NA	NA	192	727	384	722
PVP01_0308400	U4/U6 small nuclear ribonucleoprotein PRP31, putative	53.2131	5	3.04e-10	3.22122	5.59e-10	247	576	NA	NA	NA	NA	247	642	247	795
PVP01_0921700	conserved protein, unknown function	53.1833	5	3.08e-10	0.53195	5.67e-10	563	364	506	338	413	310	494	365	1482	355
PVP01_1419300	structural maintenance of chromosomes protein 2, putative	53.0882	5	3.23e-10	1.6786	5.92e-10	115	673	NA	NA	NA	NA	115	849	115	899
PVP01_0809500	metalloprotease, putative	52.8041	5	3.69e-10	1.32817	6.76e-10	405	457	193	552	332	351	310	552	930	503
PVP01_0105600	DNA replication licensing factor MCM7, putative	52.609	5	4.05e-10	0.933891	7.4e-10	358	491	366	423	180	473	301.333	566	904	514
PVP01_0419200	26S proteasome regulatory subunit RPN1, putative	52.2938	5	4.7e-10	2.13364	8.58e-10	132	660	NA	NA	NA	NA	132	822	132	884
PVP01_0316000	conserved Plasmodium protein, unknown function	52.2273	5	4.85e-10	0.703261	8.84e-10	842	265	888	197	662	211	797.333	232	2392	232
PVP01_0603900	conserved Plasmodium protein, unknown function	52.0381	5	5.3e-10	0.505258	9.66e-10	398	463	433	379	256	406	362.333	493	1087	459
PVP01_1202400	conserved Plasmodium protein, unknown function	52.0284	5	5.32e-10	0.287242	9.69e-10	574	357	686	266	237	424	499	361	1497	352
PVP01_1024700	conserved Plasmodium protein, unknown function	52.0086	5	5.37e-10	0.748727	9.77e-10	330	513	NA	NA	272	395	301	567	602	634
PVP01_0511000	histone acetyltransferase GCN5, putative	51.9851	5	5.43e-10	3.74415	9.86e-10	182	625	NA	NA	NA	NA	182	743	182	842
PVP01_0602000	Plasmodium exported protein (PHIST), unknown function	51.9212	5	5.6e-10	1.766	1.02e-09	125	665	NA	NA	NA	NA	125	836	125	890
PVP01_0729400	conserved Plasmodium protein, unknown function	51.8512	5	5.79e-10	0.910357	1.05e-09	161	642	59	665	101	541	107	861	321	748
PVP01_1403000	conserved Plasmodium protein, unknown function	51.8389	5	5.82e-10	1.73056	1.05e-09	118	671	NA	NA	NA	NA	118	846	118	897
PVP01_0808300	zinc finger (CCCH type) protein, putative	51.8161	5	5.88e-10	3.35185	1.06e-09	58	722	NA	NA	70	569	64	921	128	887
PVP01_0810100	ribosomal protein L43, mitochondrial, putative	51.7646	5	6.03e-10	0.245741	1.09e-09	728	294	588	301	464	284	593.333	305	1780	303
PVP01_1106100	ubiquitin-60S ribosomal protein L40, putative	51.6944	5	6.23e-10	1.08832	1.12e-09	120	669	NA	NA	NA	NA	120	843	120	895
PVP01_1020400	mitochondrial import inner membrane translocase subunit TIM16, putative	51.6791	5	6.28e-10	0.525603	1.13e-09	331	512	206	542	NA	NA	268.5	614	537	657
PVP01_1029900	AN1-type zinc finger protein, putative	51.6307	5	6.42e-10	0.848165	1.15e-09	418	446	311	462	NA	NA	364.5	490	729	578
PVP01_0311800	RNA-binding protein, putative	51.6277	5	6.43e-10	0.720859	1.15e-09	272	554	223	530	NA	NA	247.5	640	495	672
PVP01_1403600	ATP-dependent RNA helicase DHR1, putative	51.512	5	6.79e-10	1.70216	1.22e-09	98	687	31	684	29	599	52.6667	938	158	863
PVP01_0825900	conserved Plasmodium protein, unknown function	51.2776	5	7.59e-10	0.743768	1.36e-09	332	511	NA	NA	252	410	292	578	584	642
PVP01_0531000	pre-mRNA-splicing helicase BRR2, putative	51.0781	5	8.34e-10	0.503561	1.49e-09	225	592	170	573	125	521	173.333	757	520	664
PVP01_0728700	leucine-rich repeat protein	50.7957	5	9.52e-10	0.352938	1.7e-09	346	501	280	485	165	487	263.667	622	791	557
PVP01_0813900	conserved Plasmodium protein, unknown function	50.7589	5	9.69e-10	1.01011	1.73e-09	623	336	633	285	680	205	645.333	285	1936	285
PVP01_0721200	pre-mRNA-splicing factor 18, putative	50.6538	5	1.02e-09	0.199171	1.81e-09	925	240	760	239	498	273	727.667	257	2183	257
PVP01_1436900	conserved Plasmodium protein, unknown function	50.5203	5	1.08e-09	2.97821	1.93e-09	54	725	NA	NA	78	564	66	916	132	884
PVP01_1405900	MCL1 domain-containing protein, putative	50.2321	5	1.24e-09	0.903979	2.21e-09	210	604	130	605	NA	NA	170	762	340	740
PVP01_1028200	small ubiquitin-related modifier, putative	50.1813	5	1.27e-09	1.09149	2.26e-09	373	480	268	493	NA	NA	320.5	539	641	618
PVP01_0930500	major facilitator superfamily-related transporter, putative	50.0651	5	1.34e-09	0.789302	2.38e-09	203	610	180	563	207	453	196.667	721	590	639
PVP01_0507400	ATP-dependent RNA helicase DBP10, putative	50.0481	5	1.35e-09	0.810448	2.4e-09	152	648	NA	NA	66	572	109	859	218	817
PVP01_0110400	conserved Plasmodium protein, unknown function	49.9643	5	1.41e-09	0.692785	2.49e-09	152	648	85	643	NA	NA	118.5	845	237	802
PVP01_1131000	malate dehydrogenase, putative	49.9488	5	1.42e-09	2.83328	2.51e-09	218	599	NA	NA	NA	NA	218	688	218	817
PVP01_0415100	RING zinc finger protein, putative	49.7366	5	1.57e-09	0.424994	2.77e-09	311	526	NA	NA	226	435	268.5	614	537	657
PVP01_0116000	conserved Plasmodium protein, unknown function	49.5671	5	1.7e-09	1.49181	2.99e-09	99	686	NA	NA	NA	NA	99	874	99	913
PVP01_1300800	GPN-loop GTPase, putative	49.2605	5	1.96e-09	1.03904	3.45e-09	466	413	590	300	401	314	485.667	374	1457	363
PVP01_1267000	conserved Plasmodium protein, unknown function	48.6647	5	2.6e-09	2.66207	4.56e-09	97	688	NA	NA	NA	NA	97	877	97	915
PVP01_MIT03300	cytochrome c oxidase subunit 1	48.6256	5	2.65e-09	1.16203	4.64e-09	86	698	NA	NA	123	523	104.5	866	209	822
PVP01_1423100	histone H2B variant, putative	48.5753	5	2.71e-09	0.482964	4.75e-09	171	633	367	422	375	328	304.333	561	913	510
PVP01_0836900	DNA-directed RNA polymerases I, II, and III subunit RPABC2, putative	48.2624	5	3.14e-09	0.26931	5.49e-09	652	326	450	369	359	337	487	372	1461	361
PVP01_1346200	ribosomal protein S27a, putative	48.2271	5	3.19e-09	1.05027	5.58e-09	195	616	NA	NA	111	532	153	789	306	759
PVP01_1217900	nuclear movement protein, putative	48.1242	5	3.35e-09	0.713395	5.85e-09	1204	167	1126	160	864	162	1064.67	162	3194	162
PVP01_0713100	major facilitator superfamily-related transporter, putative	47.936	5	3.66e-09	1.24234	6.38e-09	105	681	NA	NA	NA	NA	105	864	105	907
PVP01_0820200	protein phosphatase inhibitor 2, putative	47.9223	5	3.68e-09	1.28436	6.41e-09	106	680	NA	NA	NA	NA	106	862	106	906
PVP01_1227000	conserved Plasmodium protein, unknown function	47.8079	5	3.89e-09	0.24849	6.76e-09	1214	164	1404	125	910	152	1176	149	3528	149
PVP01_1324200	small nucleolar RNA snoR31	47.478	5	4.54e-09	0.525949	7.88e-09	NA	NA	355	432	NA	NA	355	502	355	732
PVP01_0512300	ribosomal protein L4, mitochondrial, putative	47.3543	5	4.81e-09	0.448004	8.34e-09	350	498	236	520	296	374	294	577	882	522
PVP01_1405300	PUB domain-containing protein, putative	47.2867	5	4.97e-09	1.02328	8.6e-09	155	647	NA	NA	167	485	161	775	322	747
PVP01_1111300	E3 SUMO-protein ligase PIAS, putative	47.259	5	5.03e-09	0.335284	8.7e-09	321	520	349	436	250	412	306.667	558	920	506
PVP01_0529100	apical merozoite protein	47.248	5	5.06e-09	0.882998	8.73e-09	376	477	366	423	207	453	316.333	545	949	499
PVP01_1213400	60S ribosomal protein L18-2, putative	46.9778	5	5.74e-09	1.86501	9.9e-09	333	510	450	369	NA	NA	391.5	458	783	561
PVP01_0316300	conserved protein, unknown function	46.8748	5	6.03e-09	0.30697	1.04e-08	571	359	330	449	102	540	334.333	522	1003	481
PVP01_1247500	conserved protein, unknown function	46.3705	5	7.63e-09	0.493193	1.31e-08	477	407	373	418	264	401	371.333	483	1114	453
PVP01_0917800	conserved Plasmodium protein, unknown function	45.8623	5	9.69e-09	0.96417	1.67e-08	164	639	105	625	NA	NA	134.5	818	269	778
PVP01_1409300	40S ribosomal protein S27, putative	45.6904	5	1.05e-08	0.711802	1.8e-08	417	447	292	475	533	262	414	435	1242	415
PVP01_0531800	conserved Plasmodium protein, unknown function	45.5988	5	1.1e-08	0.27444	1.88e-08	549	371	536	320	184	470	423	429	1269	410
PVP01_0715000	methyltransferase, putative	45.5974	5	1.1e-08	0.173164	1.88e-08	1210	165	796	222	700	201	902	193	2706	193
PVP01_0514800	conserved protein, unknown function	45.4995	5	1.15e-08	1.09565	1.96e-08	93	692	NA	NA	NA	NA	93	882	93	919
PVP01_1232700	conserved protein, unknown function	45.3874	5	1.21e-08	0.895476	2.07e-08	199	613	NA	NA	187	468	193	725	386	720
PVP01_1247400	conserved Plasmodium protein, unknown function	45.1643	5	1.34e-08	0.585937	2.29e-08	198	614	NA	NA	104	538	151	792	302	762
PVP01_1123000	conserved Plasmodium protein, unknown function	45.0906	5	1.39e-08	1.17246	2.37e-08	83	701	NA	NA	40	592	61.5	924	123	892
PVP01_1455500	hydrolase, putative	44.9884	5	1.46e-08	0.560286	2.48e-08	210	604	NA	NA	112	531	161	775	322	747
PVP01_1259900	conserved Plasmodium protein, unknown function	44.9539	5	1.48e-08	0.879611	2.52e-08	372	481	260	501	NA	NA	316	546	632	623
PVP01_0413200	tyrosine kinase-like protein, putative	44.9357	5	1.5e-08	1.19426	2.54e-08	104	682	NA	NA	NA	NA	104	867	104	908
PVP01_1319200	plasmepsin IX, putative	44.8513	5	1.56e-08	3.47962	2.64e-08	246	577	NA	NA	NA	NA	246	643	246	796
PVP01_0923700	calcium-dependent protein kinase 7, putative	44.8379	5	1.57e-08	1.17888	2.65e-08	85	699	114	618	68	571	89	887	267	780
PVP01_0409100	palmitoyltransferase DHHC11, putative	44.8115	5	1.58e-08	1.30364	2.68e-08	95	690	NA	NA	NA	NA	95	879	95	917
PVP01_0813300	conserved Plasmodium protein, unknown function	44.766	5	1.62e-08	0.486082	2.73e-08	338	507	252	508	297	373	295.667	574	887	520
PVP01_1329100	glutathione reductase, putative	44.7578	5	1.63e-08	0.53786	2.74e-08	224	593	NA	NA	96	546	160	777	320	749
PVP01_1145900	SDE2 domain-containing protein, putative	44.6463	5	1.71e-08	0.77844	2.89e-08	143	655	110	621	NA	NA	126.5	833	253	791
PVP01_1465800	conserved protein, unknown function	44.5957	5	1.75e-08	0.426146	2.95e-08	354	494	282	483	146	503	260.667	626	782	562
PVP01_0714800	conserved Plasmodium protein, unknown function	44.3314	5	1.98e-08	2.0387	3.34e-08	129	662	NA	NA	NA	NA	129	828	129	886
PVP01_1121800	transportin, putative	44.213	5	2.1e-08	1.08615	3.52e-08	217	600	177	566	82	560	158.667	780	476	679
PVP01_0821600	conserved Plasmodium protein, unknown function	44.1299	5	2.18e-08	3.36722	3.66e-08	243	579	NA	NA	NA	NA	243	646	243	798
PVP01_1015300	WD repeat-containing protein 26, putative	43.7618	5	2.59e-08	0.380265	4.34e-08	235	584	179	564	208	452	207.333	705	622	626
PVP01_1119900	ribosomal RNA-processing protein 7, putative	43.5717	5	2.83e-08	1.88753	4.73e-08	325	517	233	522	213	448	257	631	771	566
PVP01_0932800	ubiquitin-like protein, putative	43.5562	5	2.85e-08	0.568738	4.76e-08	399	462	417	388	316	362	377.333	472	1132	442
PVP01_1458600	conserved Plasmodium protein, unknown function	43.523	5	2.89e-08	0.507633	4.83e-08	255	570	NA	NA	170	482	212.5	699	425	701
PVP01_1124600	GAS8-like protein, putative	43.4332	5	3.02e-08	3.51174	5.03e-08	NA	NA	30	685	38	594	34	960	68	940
PVP01_1454200	clustered-asparagine-rich protein, putative	43.4045	5	3.06e-08	0.243246	5.09e-08	511	391	522	330	405	313	479.333	383	1438	369
PVP01_1103500	heptatricopeptide repeat-containing protein, putative	43.2468	5	3.29e-08	0.192137	5.48e-08	752	285	688	264	527	264	655.667	281	1967	281
PVP01_0519000	HAP2-GCS1 domain-containing protein, putative	43.0099	5	3.68e-08	1.50893	6.11e-08	95	690	NA	NA	NA	NA	95	879	95	917
PVP01_1242600	zinc finger CCCH domain-containing protein, putative	42.857	5	3.95e-08	1.57135	6.55e-08	87	697	NA	NA	NA	NA	87	889	87	923
PVP01_1321200	WW domain-binding protein 11, putative	42.7718	5	4.11e-08	0.641238	6.81e-08	151	649	NA	NA	140	509	145.5	801	291	767
PVP01_0729000	zinc finger protein, putative	42.7361	5	4.18e-08	3.12914	6.92e-08	218	599	NA	NA	NA	NA	218	688	218	817
PVP01_0920700	phosphoglycerate mutase, putative	42.7106	5	4.23e-08	0.347659	6.99e-08	488	401	471	359	392	318	450.333	410	1351	393
PVP01_1450700	CG2-related protein, putative	42.6665	5	4.32e-08	0.523555	7.13e-08	NA	NA	497	343	NA	NA	497	362	497	670
PVP01_1107200	DNA-directed RNA polymerases I, II, and III subunit RPABC1, putative	42.5931	5	4.47e-08	2.32549	7.37e-08	80	704	NA	NA	NA	NA	80	899	80	929
PVP01_1429000	CCR4-associated factor 1, putative	42.0037	5	5.88e-08	1.08411	9.69e-08	128	663	72	652	NA	NA	100	872	200	828
PVP01_1112500	CUGBP Elav-like family member 1, putative	41.986	5	5.93e-08	0.160493	9.75e-08	1054	208	1308	135	737	190	1033	168	3099	168
PVP01_1415300	conserved protein, unknown function	41.9145	5	6.13e-08	0.514649	1.01e-07	1033	213	1240	141	806	172	1026.33	169	3079	169
PVP01_0406800	conserved Plasmodium protein, unknown function	41.776	5	6.54e-08	0.664094	1.07e-07	141	657	82	645	NA	NA	111.5	855	223	813
PVP01_0730800	protein MAM3, putative	41.4712	5	7.54e-08	0.540481	1.24e-07	299	535	212	537	164	488	225	679	675	605
PVP01_1468700	conserved Plasmodium protein, unknown function	41.387	5	7.84e-08	0.766351	1.28e-07	152	648	95	635	NA	NA	123.5	838	247	795
PVP01_0926100	mitochondrial import inner membrane translocase subunit TIM44, putative	41.3728	5	7.89e-08	0.506657	1.29e-07	431	439	588	301	NA	NA	509.5	350	1019	478
PVP01_0103400	conserved Plasmodium protein, unknown function	41.0977	5	8.97e-08	1.02702	1.46e-07	109	677	NA	NA	118	528	113.5	852	227	809
PVP01_0407300	E2F-associated phosphoprotein, putative	40.7564	5	1.05e-07	1.69532	1.71e-07	93	692	NA	NA	NA	NA	93	882	93	919
PVP01_1263900	conserved Plasmodium protein, unknown function	40.7576	5	1.05e-07	0.82609	1.71e-07	112	675	42	679	41	591	65	919	195	832
PVP01_1269500	vacuole membrane protein 1, putative	40.7234	5	1.07e-07	0.667791	1.74e-07	244	578	182	561	110	533	178.667	750	536	658
PVP01_1020600	purine nucleoside phosphorylase, putative	40.642	5	1.11e-07	0.958945	1.8e-07	351	497	268	493	NA	NA	309.5	553	619	628
PVP01_1232500	histone-lysine N-methyltransferase SET2, putative	40.6372	5	1.11e-07	0.452392	1.8e-07	235	584	228	527	124	522	195.667	723	587	641
PVP01_1133000	conserved Plasmodium protein, unknown function	40.5203	5	1.17e-07	0.567519	1.9e-07	206	607	NA	NA	153	497	179.5	748	359	731
PVP01_1457000	protein kinase 2, putative	40.5164	5	1.17e-07	0.521183	1.9e-07	924	241	1237	142	938	145	1033	168	3099	168
PVP01_1004500	conserved Plasmodium protein, unknown function	40.4114	5	1.23e-07	0.72363	2e-07	131	661	89	640	75	565	98.3333	875	295	766
PVP01_1455200	conserved Plasmodium protein, unknown function	40.3896	5	1.25e-07	1.6317	2.01e-07	84	700	NA	NA	NA	NA	84	894	84	926
PVP01_1439300	histone-lysine N-methyltransferase, H3 lysine-4 specific, putative	40.2752	5	1.31e-07	0.406804	2.12e-07	230	589	146	593	126	520	167.333	766	502	667
PVP01_0928800	conserved Plasmodium protein, unknown function	40.1767	5	1.38e-07	3.51954	2.22e-07	107	679	NA	NA	NA	NA	107	861	107	905
PVP01_0315900	conserved protein, unknown function	40.1587	5	1.39e-07	4.36076	2.23e-07	151	649	NA	NA	NA	NA	151	792	151	866
PVP01_1441300	cAMP-dependent protein kinase regulatory subunit, putative	40.1537	5	1.39e-07	0.939218	2.24e-07	382	474	1275	140	392	318	683	270	2049	270
PVP01_1137800	SWI/SNF-related matrix-associated actin-dependent regulator of chromatin, putative	40.0983	5	1.43e-07	2.28976	2.29e-07	132	660	NA	NA	NA	NA	132	822	132	884
PVP01_0913700	conserved protein, unknown function	39.9796	5	1.51e-07	1.05048	2.42e-07	207	606	161	581	NA	NA	184	740	368	727
PVP01_1121600	ribonuclease P protein subunit p29, putative	39.9001	5	1.56e-07	0.998269	2.51e-07	149	651	NA	NA	94	548	121.5	841	243	798
PVP01_1251500	hemolysin III, putative	39.5937	5	1.8e-07	0.952638	2.89e-07	274	553	190	555	NA	NA	232	664	464	682
PVP01_0836100	inner membrane complex protein 1e, putative	39.4131	5	1.96e-07	0.616203	3.14e-07	157	646	NA	NA	70	569	113.5	852	227	809
PVP01_0104400	tRNA m5C-methyltransferase, putative	39.271	5	2.09e-07	0.274894	3.35e-07	473	410	241	517	320	360	344.667	511	1034	474
PVP01_0818600	ATP-dependent RNA helicase DDX42, putative	39.1754	5	2.19e-07	1.00756	3.49e-07	103	683	NA	NA	NA	NA	103	869	103	909
PVP01_1030300	myosin B, putative	39.1721	5	2.19e-07	0.495711	3.5e-07	338	507	257	503	269	397	288	586	864	530
PVP01_1303400	conserved Plasmodium protein, unknown function	38.845	5	2.55e-07	1.06324	4.06e-07	92	693	NA	NA	NA	NA	92	883	92	920
PVP01_1142900	protein KIC1, putative	38.4896	5	3.01e-07	1.00235	4.78e-07	58	722	59	665	63	575	60	926	180	843
PVP01_0927100	mediator of RNA polymerase II transcription subunit 21, putative	38.3807	5	3.16e-07	0.195816	5.03e-07	1054	208	1461	119	704	199	1073	160	3219	160
PVP01_1437300	dynamin-like protein, putative	38.076	5	3.64e-07	2.48359	5.78e-07	NA	NA	NA	NA	238	423	238	653	238	801
PVP01_0410300	serine/threonine protein kinase STK2, putative	37.7497	5	4.24e-07	0.502682	6.71e-07	409	454	374	417	274	393	352.333	504	1057	469
PVP01_0928600	conserved Plasmodium protein, unknown function	37.6729	5	4.39e-07	0.240149	6.95e-07	495	397	419	386	286	383	400	450	1200	426
PVP01_0722800	thiamine pyrophosphokinase, putative	37.3176	5	5.17e-07	0.507703	8.18e-07	241	580	219	533	174	478	211.333	701	634	622
PVP01_0932000	conserved Plasmodium protein, unknown function	37.0859	5	5.76e-07	0.424313	9.09e-07	234	585	181	562	221	440	212	700	636	621
PVP01_0709100	SNARE protein, putative	37.0065	5	5.97e-07	2.13728	9.42e-07	112	675	NA	NA	NA	NA	112	854	112	901
PVP01_1233000	conserved Plasmodium protein, unknown function	36.9586	5	6.1e-07	3.20747	9.62e-07	186	622	NA	NA	NA	NA	186	737	186	840
PVP01_0405600	ribosome associated membrane protein RAMP4, putative	36.9267	5	6.2e-07	0.342416	9.75e-07	566	362	641	281	570	245	592.333	306	1777	304
PVP01_1234700	protein transport protein YIP1, putative	36.6374	5	7.08e-07	2.86119	1.11e-06	76	708	NA	NA	NA	NA	76	904	76	933
PVP01_0837900	conserved protein, unknown function	36.6324	5	7.1e-07	1.67701	1.11e-06	131	661	117	615	NA	NA	124	837	248	794
PVP01_0531500	conserved Plasmodium protein, unknown function	36.3845	5	7.96e-07	2.96676	1.25e-06	36	734	NA	NA	99	543	67.5	914	135	881
PVP01_0707800	apoptosis-related protein, putative	36.3425	5	8.11e-07	0.87282	1.27e-06	474	409	461	364	0	608	311.667	550	935	501
PVP01_1108200	nuclear fusion protein, putative	36.2869	5	8.32e-07	0.614403	1.3e-06	160	643	70	654	88	554	106	862	318	751
PVP01_1030500	actin-depolymerizing factor 1, putative	36.2101	5	8.62e-07	0.185904	1.35e-06	1451	132	1212	148	1084	117	1249	138	3747	138
PVP01_1228500	conserved Plasmodium protein, unknown function	36.1345	5	8.93e-07	0.459445	1.39e-06	617	338	482	352	549	255	549.333	328	1648	323
PVP01_0714500	thioredoxin 3, putative	36.0487	5	9.29e-07	0.260266	1.45e-06	1335	146	1434	123	875	160	1214.67	143	3644	143
PVP01_0706500	plasma membrane protein 1, putative	36.0074	5	9.47e-07	0.455095	1.48e-06	258	568	145	594	114	530	172.333	759	517	665
PVP01_1343200	ribonucleoside-diphosphate reductase small chain, putative	35.7974	5	1.04e-06	1.32477	1.62e-06	78	706	NA	NA	NA	NA	78	902	78	931
PVP01_0106800	conserved Plasmodium protein, unknown function	35.7378	5	1.07e-06	1.35525	1.67e-06	66	714	NA	NA	NA	NA	66	916	66	941
PVP01_1462100	5-formyltetrahydrofolate cyclo-ligase, putative	35.3377	5	1.29e-06	1.23645	2e-06	63	717	NA	NA	NA	NA	63	922	63	944
PVP01_1136000	conserved Plasmodium protein, unknown function	35.0216	5	1.49e-06	0.175979	2.31e-06	1515	125	2246	64	1340	86	1700.33	85	5101	85
PVP01_0915900	histone-lysine N-methyltransferase SET7, putative	35.0121	5	1.5e-06	2.01825	2.32e-06	77	707	NA	NA	NA	NA	77	903	77	932
PVP01_1339500	conserved Plasmodium protein, unknown function	34.9283	5	1.56e-06	3.08919	2.41e-06	141	657	NA	NA	NA	NA	141	808	141	875
PVP01_0912800	conserved protein, unknown function	34.7239	5	1.71e-06	0.264235	2.64e-06	1713	107	2151	70	1430	80	1764.67	82	5294	82
PVP01_1339400	histidine phosphatase, putative	34.5034	5	1.89e-06	2.43416	2.92e-06	34	736	NA	NA	48	586	41	953	82	927
PVP01_0818500	conserved Plasmodium protein, unknown function	34.4362	5	1.95e-06	0.613666	3.01e-06	143	655	NA	NA	78	564	110.5	857	221	815
PVP01_1233500	CKK domain-containing protein, putative	34.3681	5	2.01e-06	3.12895	3.1e-06	157	646	NA	NA	NA	NA	157	783	157	864
PVP01_1341200	multifunctional methyltransferase subunit TRM112, putative	34.1208	5	2.25e-06	0.279976	3.47e-06	724	295	669	276	431	301	608	298	1824	297
PVP01_0829200	conserved Plasmodium protein, unknown function	34.029	5	2.35e-06	1.42639	3.61e-06	76	708	NA	NA	NA	NA	76	904	76	933
PVP01_1257400	conserved protein, unknown function	33.9751	5	2.41e-06	1.59335	3.7e-06	78	706	NA	NA	NA	NA	78	902	78	931
PVP01_0204700	DNA-directed RNA polymerase II subunit RPB9, putative	33.787	5	2.63e-06	0.280959	4.03e-06	310	527	335	444	314	363	319.667	541	959	496
PVP01_0612900	60S ribosomal protein L3, putative	33.6659	5	2.77e-06	1.35949	4.25e-06	77	707	NA	NA	NA	NA	77	903	77	932
PVP01_1329600	glutathione S-transferase, putative	33.2686	5	3.33e-06	1.03171	5.1e-06	NA	NA	347	438	NA	NA	347	509	347	737
PVP01_1119100	conserved Plasmodium protein, unknown function	33.2606	5	3.34e-06	0.480533	5.11e-06	351	497	238	518	166	486	251.667	635	755	570
PVP01_0111100	conserved Plasmodium protein, unknown function	33.2067	5	3.42e-06	0.554762	5.23e-06	343	504	193	552	218	443	251.333	636	754	571
PVP01_1225900	alpha/beta-hydrolase, putative	33.1744	5	3.47e-06	0.40604	5.3e-06	205	608	278	487	NA	NA	241.5	650	483	676
PVP01_0420500	5'-3' exonuclease, putative	32.8288	5	4.07e-06	1.77995	6.2e-06	78	706	NA	NA	NA	NA	78	902	78	931
PVP01_1223600	protein kinase, putative	32.5943	5	4.53e-06	0.35836	6.9e-06	265	561	190	555	241	420	232	664	696	594
PVP01_0701600	ras-related protein RAB7, putative	32.4402	5	4.86e-06	0.919865	7.39e-06	327	515	299	470	242	419	289.333	582	868	526
PVP01_1333600	RNA-binding protein Nova-1, putative	32.2924	5	5.2e-06	1.00293	7.9e-06	69	712	NA	NA	53	581	61	925	122	893
PVP01_0117200	peptidyl-prolyl cis-trans isomerase, putative	32.2134	5	5.39e-06	0.338396	8.18e-06	312	525	305	466	210	450	275.667	603	827	544
PVP01_1234900	conserved Plasmodium protein, unknown function	32.0904	5	5.7e-06	2.78361	8.63e-06	118	671	NA	NA	NA	NA	118	846	118	897
PVP01_1311600	HSP40, subfamily A, putative	32.0907	5	5.7e-06	0.386891	8.63e-06	1045	212	1207	149	675	207	975.667	179	2927	179
PVP01_1205900	conserved Plasmodium protein, unknown function	32.003	5	5.93e-06	0.456792	8.97e-06	210	604	NA	NA	126	520	168	765	336	742
PVP01_1409400	conserved Plasmodium protein, unknown function	31.8696	5	6.31e-06	1.41056	9.53e-06	76	708	NA	NA	NA	NA	76	904	76	933
PVP01_1233700	GTPase-activating protein, putative	31.8417	5	6.39e-06	0.337505	9.64e-06	289	543	244	514	NA	NA	266.5	615	533	659
PVP01_0710000	conserved Plasmodium protein, unknown function	31.6892	5	6.85e-06	4.00179	1.03e-05	109	677	NA	NA	NA	NA	109	859	109	903
PVP01_1339100	CUGBP Elav-like family member 2, putative	31.5288	5	7.36e-06	0.479222	1.11e-05	164	639	NA	NA	160	490	162	774	324	746
PVP01_0927800	deoxyuridine 5'-triphosphate nucleotidohydrolase, putative	31.4109	5	7.77e-06	0.297484	1.17e-05	371	482	395	404	217	444	327.667	528	983	487
PVP01_1252500	iron-sulfur cluster assembly protein ISU, putative	31.2875	5	8.22e-06	0.17961	1.24e-05	1379	142	1760	88	1028	128	1389	120	4167	120
PVP01_1340400	40S ribosomal protein S8e, putative	31.2783	5	8.25e-06	1.73566	1.24e-05	61	719	NA	NA	NA	NA	61	925	61	946
PVP01_0720600	ubiquitin-like protein, putative	31.2266	5	8.45e-06	0.424235	1.27e-05	316	522	285	480	190	465	263.667	622	791	557
PVP01_1207900	conserved Plasmodium protein, unknown function	31.1017	5	8.94e-06	1.77152	1.34e-05	75	709	NA	NA	NA	NA	75	906	75	934
PVP01_1306600	RNA-binding protein	30.7054	5	1.07e-05	1.02543	1.6e-05	206	607	127	608	90	552	141	808	423	703
PVP01_0319800	conserved Plasmodium protein, unknown function	30.6073	5	1.12e-05	0.307439	1.67e-05	263	563	250	509	138	510	217	690	651	611
PVP01_0103800	conserved protein, unknown function	30.5506	5	1.15e-05	0.499098	1.72e-05	311	526	281	484	NA	NA	296	573	592	638
PVP01_0410000	rhoptry neck protein 6, putative	30.532	5	1.16e-05	0.372937	1.73e-05	251	573	NA	NA	225	436	238	653	476	679
PVP01_1344000	conserved Plasmodium protein, unknown function	30.3907	5	1.24e-05	0.59873	1.84e-05	340	505	294	474	NA	NA	317	544	634	622
PVP01_1239200	conserved Plasmodium protein, unknown function	30.0596	5	1.44e-05	0.639607	2.14e-05	102	684	102	628	NA	NA	102	870	204	827
PVP01_0210900	actin-related protein ARP1, putative	29.8873	5	1.55e-05	1.26496	2.31e-05	65	715	NA	NA	NA	NA	65	919	65	942
PVP01_0923500	dynein heavy chain, putative	29.8187	5	1.6e-05	1.49335	2.38e-05	69	712	NA	NA	NA	NA	69	912	69	939
PVP01_1132900	kinetochore protein NDC80, putative	29.3621	5	1.97e-05	0.568495	2.92e-05	216	601	106	624	118	528	146.667	799	440	695
PVP01_0615900	calmodulin, putative	29.2824	5	2.04e-05	1.10395	3.02e-05	NA	NA	86	642	43	589	64.5	920	129	886
PVP01_1109600	calpain, putative	29.2731	5	2.05e-05	0.628085	3.03e-05	90	695	78	647	NA	NA	84	894	168	854
PVP01_0705700	GTPase-activating protein, putative	29.2477	5	2.07e-05	2.44577	3.07e-05	51	727	NA	NA	NA	NA	51	941	51	956
PVP01_1431900	U1 spliceosomal RNA	28.9147	5	2.41e-05	1.81316	3.56e-05	78	706	NA	NA	NA	NA	78	902	78	931
PVP01_1212800	40S ribosomal protein S6, putative	28.8316	5	2.5e-05	0.512666	3.69e-05	578	354	678	269	622	221	626	291	1878	291
PVP01_0927700	protein phosphatase, putative	28.6388	5	2.73e-05	1.38122	4.02e-05	54	725	51	672	NA	NA	52.5	939	105	907
PVP01_1413700	conserved Plasmodium protein, unknown function	28.6318	5	2.74e-05	1.54707	4.03e-05	61	719	37	681	NA	NA	49	943	98	914
PVP01_0421300	conserved Plasmodium protein, unknown function	28.5947	5	2.78e-05	0.170387	4.1e-05	683	311	782	228	401	314	622	293	1866	293
PVP01_1305200	IMP-specific 5'-nucleotidase 1, putative	28.3441	5	3.12e-05	1.17013	4.58e-05	NA	NA	NA	NA	144	505	144	804	144	872
PVP01_0113300	DNA helicase PSH3, putative	28.2358	5	3.27e-05	1.3437	4.8e-05	60	720	NA	NA	NA	NA	60	926	60	947
PVP01_1407700	RED-like protein, putative	28.1149	5	3.46e-05	1.22476	5.07e-05	112	675	NA	NA	50	584	81	897	162	859
PVP01_1220800	conserved Plasmodium protein, unknown function	27.9662	5	3.7e-05	0.903283	5.41e-05	101	685	NA	NA	49	585	75	906	150	867
PVP01_0512400	conserved protein, unknown function	27.8663	5	3.87e-05	3.06979	5.66e-05	144	654	NA	NA	NA	NA	144	804	144	872
PVP01_1339000	cytidine diphosphate-diacylglycerol synthase, putative	27.7508	5	4.07e-05	0.650824	5.95e-05	141	657	96	634	NA	NA	118.5	845	237	802
PVP01_0734300	conserved Plasmodium protein, unknown function	27.4314	5	4.7e-05	0.29221	6.86e-05	322	519	200	547	228	433	250	638	750	572
PVP01_1311100	non-SERCA-type Ca2 -transporting P-ATPase, putative	27.1353	5	5.37e-05	0.409797	7.83e-05	240	581	206	542	NA	NA	223	683	446	693
PVP01_1305900	conserved Plasmodium protein, unknown function	27.1175	5	5.41e-05	0.528691	7.88e-05	172	632	201	546	NA	NA	186.5	736	373	726
PVP01_1463300	conserved Plasmodium protein, unknown function	27.0259	5	5.64e-05	1.19469	8.21e-05	NA	NA	399	401	284	384	341.5	517	683	601
PVP01_0733300	conserved Plasmodium protein, unknown function	26.9634	5	5.8e-05	0.455084	8.43e-05	346	501	406	396	317	361	356.333	500	1069	464
PVP01_0528700	conserved Plasmodium protein, unknown function	26.6971	5	6.53e-05	1.55664	9.49e-05	NA	NA	NA	NA	179	474	179	749	179	844
PVP01_0527200	cdc2-related protein kinase 1, putative	26.6086	5	6.8e-05	3.2917	9.86e-05	142	656	NA	NA	NA	NA	142	807	142	874
PVP01_0936900	conserved Plasmodium protein, unknown function	26.5979	5	6.83e-05	0.635921	9.9e-05	88	696	NA	NA	63	575	75.5	905	151	866
PVP01_1333900	uracil-DNA glycosylase, putative	26.2253	5	8.07e-05	3.12762	0.000117	170	634	NA	NA	NA	NA	170	762	170	852
PVP01_0613800	merozoite TRAP-like protein, putative	26.0283	5	8.81e-05	0.477414	0.000127	NA	NA	464	362	490	276	477	385	954	497
PVP01_0944900	conserved Plasmodium protein, unknown function	25.7567	5	9.95e-05	3.50356	0.000144	186	622	NA	NA	NA	NA	186	737	186	840
PVP01_1410300	U4/U6 small nuclear ribonucleoprotein PRP3, putative	25.5841	5	0.000107	2.37116	0.000155	76	708	NA	NA	NA	NA	76	904	76	933
PVP01_1431700	succinate dehydrogenase [ubiquinone] iron-sulfur subunit, mitochondrial, putative	25.571	5	0.000108	0.161751	0.000156	700	304	634	284	439	297	591	308	1773	306
PVP01_0617700	conserved protein, unknown function	25.53	5	0.00011	0.971823	0.000159	291	541	324	454	NA	NA	307.5	556	615	630
PVP01_0823500	formate-nitrite transporter, putative	25.3854	5	0.000117	0.357743	0.000169	420	444	412	391	NA	NA	416	433	832	543
PVP01_0928300	CRAL/TRIO domain-containing protein, putative	25.2442	5	0.000125	1.44843	0.00018	58	722	NA	NA	NA	NA	58	929	58	949
PVP01_0614500	LEM3/CDC50 family protein, putative	25.1815	5	0.000129	0.254277	0.000185	268	558	281	484	219	442	256	632	768	567
PVP01_0616200	conserved Plasmodium protein, unknown function	25.0297	5	0.000138	2.04293	0.000197	NA	NA	NA	NA	36	596	36	958	36	970
PVP01_1333800	conserved protein, unknown function	24.6895	5	0.00016	3.95015	0.000229	307	530	NA	NA	NA	NA	307	557	307	758
PVP01_0206100	photosensitized INA-labeled protein PHIL1, putative	24.6619	5	0.000162	2.00195	0.000232	NA	NA	NA	NA	147	502	147	798	147	870
PVP01_1141400	spindle assembly abnormal protein 6, putative	24.5528	5	0.00017	0.533718	0.000243	176	629	NA	NA	174	478	175	753	350	735
PVP01_1246500	60S ribosomal protein L29, putative	24.5116	5	0.000173	0.943571	0.000247	121	668	141	596	NA	NA	131	825	262	785
PVP01_1224200	DnaJ protein, putative	24.5044	5	0.000174	0.410014	0.000248	308	529	282	483	221	440	270.333	610	811	550
PVP01_1426000	AAA family ATPase, putative	24.4174	5	0.00018	0.564151	0.000257	106	680	67	657	NA	NA	86.5	890	173	849
PVP01_1342900	RNA-binding protein, putative	24.4093	5	0.000181	0.220578	0.000258	1081	201	1147	156	791	176	1006.33	174	3019	174
PVP01_1326900	ribosomal protein L21, mitochondrial, putative	24.3407	5	0.000187	1.0861	0.000266	411	452	522	330	213	448	382	468	1146	438
PVP01_1223100	conserved Plasmodium protein, unknown function	24.1838	5	0.0002	2.39093	0.000284	64	716	NA	NA	NA	NA	64	921	64	943
PVP01_1112000	conserved Plasmodium protein, unknown function	24.1214	5	0.000206	3.65739	0.000292	46	729	NA	NA	NA	NA	46	946	46	961
PVP01_0932700	conserved Plasmodium protein, unknown function	24.101	5	0.000208	0.511702	0.000294	283	548	288	478	218	443	263	624	789	559
PVP01_1405200	conserved Plasmodium protein, unknown function	23.9256	5	0.000224	0.530047	0.000318	384	472	208	541	229	432	273.667	606	821	547
PVP01_1265500	conserved Plasmodium protein, unknown function	23.8999	5	0.000227	0.267124	0.000321	400	461	419	386	224	437	347.667	508	1043	472
PVP01_1125900	splicing factor-like protein 1, putative	23.8015	5	0.000237	1.28212	0.000335	62	718	NA	NA	NA	NA	62	923	62	945
PVP01_1268100	thioredoxin peroxidase 1, putative	23.6984	5	0.000248	0.232369	0.00035	1137	186	1217	145	902	155	1085.33	159	3256	159
PVP01_1249300	conserved Plasmodium protein, unknown function	23.6554	5	0.000253	0.457683	0.000357	211	603	146	593	141	508	166	768	498	669
PVP01_1210500	zinc finger protein, putative	23.3117	5	0.000294	0.735423	0.000415	64	716	53	670	49	585	55.3333	933	166	856
PVP01_0929600	conserved protein, unknown function	23.1319	5	0.000319	3.01332	0.000449	87	697	NA	NA	NA	NA	87	889	87	923
PVP01_1435500	perforin-like protein 2	23.1191	5	0.00032	0.450766	0.000451	458	417	312	461	206	454	325.333	530	976	489
PVP01_1146700	MYND-type zinc finger protein, putative	23.0919	5	0.000324	0.806392	0.000456	368	485	365	424	229	432	320.667	538	962	494
PVP01_1420800	golgi protein 1, putative	23.0816	5	0.000326	0.600126	0.000457	NA	NA	307	464	240	421	273.5	607	547	653
PVP01_0413400	WD repeat-containing protein, putative	22.8922	5	0.000354	1.14262	0.000496	55	724	NA	NA	NA	NA	55	934	55	952
PVP01_0921100	tRNA nucleotidyltransferase, putative	22.8795	5	0.000356	0.246811	0.000499	349	499	435	378	125	521	303	563	909	511
PVP01_1103800	ABC transporter E family member 1, putative	22.7882	5	0.000371	0.522999	0.000519	229	590	191	554	119	527	179.667	747	539	656
PVP01_1226400	conserved Plasmodium protein, unknown function	22.7418	5	0.000378	3.03251	0.000529	112	675	NA	NA	NA	NA	112	854	112	901
PVP01_0832800	ATP-dependent Clp protease proteolytic subunit, putative	22.6197	5	0.000399	0.92388	0.000557	NA	NA	218	534	NA	NA	218	688	218	817
PVP01_0926900	40S ribosomal protein S18, putative	22.5915	5	0.000404	0.448233	0.000564	344	503	332	447	223	438	299.667	569	899	516
PVP01_0726300	cytochrome c oxidase subunit 5B, putative	22.5213	5	0.000417	1.20866	0.000581	94	691	98	632	NA	NA	96	878	192	834
PVP01_1453000	CHCH domain-containing protein, putative	22.4778	5	0.000425	0.147682	0.000591	1210	165	1614	103	980	136	1268	133	3804	133
PVP01_0622400	antigen UB05, putative	22.1905	5	0.000482	4.22689	0.00067	38	733	NA	NA	NA	NA	38	956	38	968
PVP01_1418300	zinc finger protein, putative	22.1189	5	0.000497	0.218238	0.000691	523	386	528	327	359	337	470	390	1410	375
PVP01_1442500	polyadenylate-binding protein 1, putative	22.0329	5	0.000516	0.826412	0.000717	NA	NA	99	631	83	559	91	885	182	842
PVP01_1264900	replication factor A protein 3, putative	21.9081	5	0.000545	0.708694	0.000755	412	451	329	450	NA	NA	370.5	485	741	574
PVP01_1344700	cytochrome c, putative	21.9101	5	0.000545	0.384293	0.000755	362	489	508	336	384	322	418	431	1254	412
PVP01_1018300	gamete egress protein GEP, putative	21.8608	5	0.000556	1.41962	0.00077	55	724	NA	NA	NA	NA	55	934	55	952
PVP01_0109300	chloroquine resistance transporter	21.706	5	0.000595	0.51781	0.000823	227	591	842	209	225	436	431.333	423	1294	405
PVP01_1258800	condensin-2 complex subunit G2, putative	21.6239	5	0.000617	1.5478	0.000853	NA	NA	393	406	NA	NA	393	457	393	717
PVP01_1220300	MSP7-like protein	21.5902	5	0.000626	0.704489	0.000864	NA	NA	NA	NA	213	448	213	698	213	819
PVP01_1422500	GPCR-like receptor SR25, putative	21.5814	5	0.000629	0.735934	0.000867	365	487	441	374	NA	NA	403	447	806	552
PVP01_0528600	protein transport protein GOT1, putative	21.507	5	0.000649	0.809752	0.000895	0	748	NA	NA	136	512	68	913	136	880
PVP01_1438100	raf kinase inhibitor, putative	21.2059	5	0.000741	1.45139	0.00101908	NA	NA	NA	NA	102	540	102	870	102	910
PVP01_1312000	conserved Plasmodium protein, unknown function	21.0417	5	0.000795	0.4565	0.0010935	277	552	349	436	439	297	355	502	1065	466
PVP01_1205800	conserved Plasmodium protein, unknown function	20.9963	5	0.000811	0.334377	0.00111422	NA	NA	491	346	211	449	351	506	702	591
PVP01_0918900	insulinase, putative	20.8582	5	0.000862	1.19379	0.00118202	72	711	NA	NA	69	570	70.5	910	141	875
PVP01_1242000	conserved Plasmodium protein, unknown function	20.8285	5	0.000873	0.652713	0.00119616	NA	NA	298	471	NA	NA	298	571	298	764
PVP01_1121700	acetyl-CoA synthetase, putative	20.8214	5	0.000875	1.05482	0.00119867	142	656	193	552	124	522	153	789	459	685
PVP01_1262700	1-acyl-sn-glycerol-3-phosphate acyltransferase, putative	20.7666	5	0.000897	0.367065	0.00122637	661	321	671	275	445	293	592.333	306	1777	304
PVP01_0618700	pre-mRNA-splicing factor CEF1, putative	20.5373	5	0.00099	3.05204	0.00135333	82	702	NA	NA	NA	NA	82	896	82	927
PVP01_1341500	conserved Plasmodium protein, unknown function	20.3949	5	0.00105345	0.249906	0.00143813	373	480	367	422	NA	NA	370	486	740	575
PVP01_0415000	ATP-dependent RNA helicase UAP56, putative	20.25	5	0.00112165	1.16907	0.00152972	213	602	172	571	NA	NA	192.5	726	385	721
PVP01_0811900	PRE-binding protein, putative	20.13	5	0.00118144	0.168045	0.00160969	577	355	492	345	405	313	491.333	370	1474	359
PVP01_1417300	SAS6-like protein, putative	20.1106	5	0.0011914	0.83254	0.00162166	213	602	236	520	165	487	204.667	710	614	631
PVP01_1344300	rRNA biogenesis protein RRP5, putative	20.0181	5	0.00124002	2.92508	0.00168618	91	694	NA	NA	NA	NA	91	885	91	921
PVP01_0710300	conserved Plasmodium protein, unknown function	19.9959	5	0.00125192	0.617852	0.00169904	94	691	47	676	NA	NA	70.5	910	141	875
PVP01_1324800	60S ribosomal protein L5, putative	19.9965	5	0.00125162	0.840514	0.00169904	257	569	279	486	187	468	241	651	723	581
PVP01_0531400	methyltransferase, putative	19.9449	5	0.00127984	0.331113	0.00173523	192	617	NA	NA	155	495	173.5	756	347	737
PVP01_1338600	WD repeat-containing protein, putative	19.4738	5	0.00156806	0.711285	0.00212393	218	599	181	562	NA	NA	199.5	715	399	714
PVP01_1450800	conserved Plasmodium protein, unknown function	19.334	5	0.00166531	0.407135	0.00225345	NA	NA	391	407	NA	NA	391	459	391	718
PVP01_0412600	eukaryotic peptide chain release factor subunit 1, putative	19.186	5	0.00177463	3.52489	0.00239903	105	681	NA	NA	NA	NA	105	864	105	907
PVP01_1335700	conserved Plasmodium protein, unknown function	19.15	5	0.00180232	1.32517	0.0024341	107	679	121	613	86	556	104.667	865	314	754
PVP01_1211400	DNA repair protein RAD5, putative	19.0923	5	0.00184749	0.221742	0.00249268	267	559	312	461	157	493	245.333	644	736	576
PVP01_1244000	glyceraldehyde-3-phosphate dehydrogenase, putative	19.0405	5	0.00188905	1.29789	0.00254627	34	736	NA	NA	51	583	42.5	950	85	925
PVP01_1346400	zinc finger protein, putative	19.0214	5	0.00190459	0.917332	0.00256473	NA	NA	NA	NA	111	532	111	856	111	902
PVP01_1329700	thioredoxin-like protein, putative	18.8252	5	0.00207163	0.323225	0.00278696	222	595	182	561	151	498	185	738	555	651
PVP01_0619900	conserved protein, unknown function	18.6821	5	0.00220257	0.730177	0.00296023	326	516	409	393	235	426	323.333	533	970	490
PVP01_0712900	conserved Plasmodium protein, unknown function	18.6026	5	0.00227871	0.358796	0.00305961	140	658	121	613	83	559	114.667	850	344	738
PVP01_1205100	peptidase, putative	18.5943	5	0.00228677	0.215033	0.00306746	NA	NA	396	403	274	393	335	520	670	608
PVP01_0304700	liver specific protein 2	18.572	5	0.00230873	3.87763	0.00309392	NA	NA	33	682	23	602	28	967	56	951
PVP01_1405400	small heat shock protein, putative	18.4885	5	0.00239256	0.0866259	0.00320316	2687	62	2442	54	1830	53	2319.67	58	6959	58
PVP01_0819300	histone H2A.Z, putative	18.4709	5	0.00241057	0.771523	0.00322416	309	528	250	509	NA	NA	279.5	599	559	650
PVP01_0935100	conserved Plasmodium protein, unknown function	18.4632	5	0.00241854	0.695747	0.00323171	91	694	NA	NA	50	584	70.5	910	141	875
PVP01_1137600	basal complex transmembrane protein 1, putative	18.4291	5	0.00245398	0.293806	0.00327361	219	598	169	574	143	506	177	751	531	660
PVP01_0909500	heat shock protein J2, putative	18.4285	5	0.00245462	1.03835	0.00327361	NA	NA	62	662	NA	NA	62	923	62	945
PVP01_1268600	metacaspase-2, putative	18.3443	5	0.00254446	1.25979	0.00339017	46	729	NA	NA	NA	NA	46	946	46	961
PVP01_1218300	conserved Plasmodium protein, unknown function	18.3113	5	0.00258051	0.89361	0.00343491	59	721	NA	NA	NA	NA	59	927	59	948
PVP01_1015600	proteasome subunit beta type-1, putative	18.2177	5	0.00268557	2.03433	0.00357132	47	728	NA	NA	101	541	74	907	148	869
PVP01_0508200	HECT-like E3 ubiquitin ligase, putative	18.1673	5	0.00274386	0.493455	0.00364534	141	657	129	606	NA	NA	135	817	270	777
PVP01_1256600	E3 ubiquitin-protein ligase ZNF598, putative	18.0177	5	0.00292431	3.74018	0.00388136	138	659	NA	NA	NA	NA	138	811	138	878
PVP01_1451900	conserved protein, unknown function	17.9766	5	0.00297585	0.325311	0.00394599	NA	NA	286	479	NA	NA	286	588	286	769
PVP01_0513100	conserved protein, unknown function	17.9383	5	0.00302469	0.294888	0.00400691	311	526	518	332	279	389	369.333	487	1108	455
PVP01_1245500	40S ribosomal protein S28e, putative	17.7488	5	0.00327822	0.31115	0.00433863	1494	127	1729	93	1002	131	1408.33	117	4225	117
PVP01_1005400	palmitoyltransferase DHHC7, putative	17.649	5	0.00342009	1.13499	0.00452208	NA	NA	108	623	NA	NA	108	860	108	904
PVP01_0303100	alpha/beta hydrolase, putative	17.602	5	0.00348883	3.21962	0.00460858	81	703	NA	NA	NA	NA	81	897	81	928
PVP01_1404200	conserved Plasmodium protein, unknown function	17.4718	5	0.00368665	0.146491	0.00486526	485	403	749	244	362	335	532	339	1596	333
PVP01_0303200	SET domain protein, putative	17.4471	5	0.00372539	0.323494	0.00491171	227	591	197	549	NA	NA	212	700	424	702
PVP01_1313200	translocon component PTEX150, putative	17.4057	5	0.00379124	0.674358	0.00499378	NA	NA	NA	NA	114	530	114	851	114	900
PVP01_0806800	roadblock/LC7 domain-containing protein, putative	17.2962	5	0.00397104	0.214611	0.00522564	NA	NA	473	358	214	447	343.5	514	687	599
PVP01_0727500	transcription initiation factor TFIID subunit 7, putative	17.2666	5	0.00402099	0.20385	0.00528636	430	440	321	457	435	299	395.333	454	1186	429
PVP01_1468100	HSP20-like chaperone, putative	17.1564	5	0.00421248	3.0179	0.00553287	96	689	NA	NA	NA	NA	96	878	96	916
PVP01_1456500	conserved protein, unknown function	17.1489	5	0.00422597	2.61307	0.00554534	79	705	NA	NA	NA	NA	79	900	79	930
PVP01_1105500	nucleoside diphosphate kinase, putative	17.0861	5	0.0043393	0.172124	0.00568867	681	313	817	216	414	309	637.333	288	1912	288
PVP01_1032600	merozoite surface protein 8	16.8237	5	0.0048466	0.97097	0.00634772	54	725	NA	NA	31	598	42.5	950	85	925
PVP01_1423500	calmodulin, putative	16.7331	5	0.00503472	0.143509	0.00658788	533	379	560	308	369	332	487.333	371	1462	360
PVP01_1261500	conserved Plasmodium protein, unknown function	16.6521	5	0.00520922	0.480293	0.00680979	389	469	379	414	201	458	323	534	969	491
PVP01_0721100	glutamine synthetase, putative	16.5074	5	0.00553519	1.35932	0.00722911	NA	NA	NA	NA	64	574	64	921	64	943
PVP01_1202800	GTP-binding protein, putative	16.486	5	0.00558527	3.16177	0.00728764	104	682	NA	NA	NA	NA	104	867	104	908
PVP01_1331200	conserved protein, unknown function	16.4009	5	0.00578791	0.75017	0.00754496	NA	NA	NA	NA	128	519	128	831	128	887
PVP01_0114200	ferlin-like protein, putative	16.0819	5	0.00661412	2.04804	0.00861388	NA	NA	93	637	NA	NA	93	882	93	919
PVP01_0214200	conserved Plasmodium protein, unknown function	15.9952	5	0.00685785	0.900742	0.00892293	84	700	NA	NA	83	559	83.5	895	167	855
PVP01_0204600	bromodomain protein 3, putative	15.9568	5	0.00696863	3.33386	0.00905857	122	667	NA	NA	NA	NA	122	840	122	893
PVP01_0512900	conserved Plasmodium protein, unknown function	15.9184	5	0.00708108	0.455652	0.00919613	442	431	445	372	273	394	386.667	462	1160	434
PVP01_1334800	zinc finger protein, putative	15.8583	5	0.00726039	0.20774	0.00942017	1297	152	1480	117	1076	118	1284.33	132	3853	132
PVP01_0937900	U2 spliceosomal RNA	15.7569	5	0.00757342	0.410903	0.00981714	202	611	128	607	175	477	168.333	764	505	666
PVP01_1433500	conserved protein, unknown function	15.7483	5	0.00760053	0.481588	0.00984308	NA	NA	NA	NA	207	453	207	706	207	824
PVP01_0905900	histone 2B, putative	15.7339	5	0.00764633	0.839716	0.00989315	NA	NA	77	648	92	550	84.5	893	169	853
