# Supplementary material for: Single-cell RNA sequencing of Plasmodium vivax sporozoites reveals stage- and species-specific transcriptomic signatures
Source: PLoS Negl Trop Dis. 2022 Aug 4;16(8):e0010633. doi: 10.1371/journal.pntd.0010633 (PMC9380936; doi:10.1371/journal.pntd.0010633)
Supplement: S8 Table — (XLSX) [file pntd.0010633.s008.xlsx]

## Sheet: Sheet1
Supplementary Table S8. Summary of orthologous genes used in cross-species integrated analysis.
gene info		OrthoFinder orthologues							Detection in single-cell Pv Spz
ID	description	Orthogroup	n_entries_ortho	berghei	falciparum	cynomolgiM	cynomolgiB	Pf_description	PvSPZ_10x
PVP01_1114900	elongation factor 1-alpha, putative	NA	NA	NA	NA	NA	NA	NA	FALSE
PVP01_0706500	plasma membrane protein 1, putative	OG0001426	5	PBANKA_0809400	PF3D7_0908000	PcyM_0705900	PCYB_071580	plasma membrane protein 1, putative	TRUE
PVP01_0927400	autophagy-related protein 23, putative	OG0003823	5	PBANKA_0921700	PF3D7_1126700	PcyM_0931100	PCYB_093280	autophagy-related protein 23, putative	FALSE
PVP01_1332200	conserved protein, unknown function	OG0001930	5	PBANKA_1026000	PF3D7_1416700	PcyM_1337600	PCYB_134000	conserved protein, unknown function	FALSE
PVP01_1016800	conserved Plasmodium protein, unknown function	OG0004252	5	PBANKA_1232000	PF3D7_0517200	PcyM_1015200	PCYB_102460	conserved Plasmodium protein, unknown function	FALSE
PVP01_1400600	Plasmodium exported protein, unknown function, pseudogene	NA	NA	NA	NA	NA	NA	NA	FALSE
PVP01_1016500	UTP--glucose-1-phosphate uridylyltransferase, putative	OG0002436	5	PBANKA_1232300	PF3D7_0517500	PcyM_1014800	PCYB_102430	UTP--glucose-1-phosphate uridylyltransferase, putative	FALSE
PVP01_0516500	Plasmodium exported protein (PHIST), unknown function	OG0004903	3	NA	NA	PcyM_0516100	PCYB_052290	NA	FALSE
PVP01_API00500	tRNA Methionine	NA	NA	NA	NA	NA	NA	NA	FALSE
PVP01_1462500	50S ribosomal protein L3, mitochondrial, putative	OG0003195	5	PBANKA_1458600	PF3D7_1245400	PcyM_1468800	PCYB_146990	50S ribosomal protein L3, mitochondrial, putative	FALSE
PVP01_1230500	conserved Plasmodium protein, unknown function	OG0004419	5	PBANKA_1339300	PF3D7_1324100	PcyM_1235100	PCYB_123870	conserved Plasmodium membrane protein, unknown function	FALSE
PVP01_1260000	40S ribosomal protein S5, putative	OG0002565	5	PBANKA_1310800	PF3D7_1447000	PcyM_1268800	PCYB_126810	40S ribosomal protein S5	FALSE
PVP01_1256000	conserved Plasmodium protein, unknown function	OG0004337	5	PBANKA_1314700	PF3D7_1451000	PcyM_1264300	PCYB_126410	conserved Plasmodium protein, unknown function	TRUE
PVP01_1236000	conserved Plasmodium protein, unknown function	OG0004404	5	PBANKA_1334000	PF3D7_1470800	PcyM_1241200	PCYB_124420	conserved Plasmodium protein, unknown function	FALSE
PVP01_0414400	conserved Plasmodium protein, unknown function	OG0003331	5	PBANKA_0307400	PF3D7_0210500	PcyM_0412700	PCYB_041950	conserved Plasmodium protein, unknown function	FALSE
PVP01_0010660	PIR protein	NA	NA	NA	NA	NA	NA	NA	FALSE
PVP01_0424400	PIR protein	NA	NA	NA	NA	NA	NA	NA	FALSE
PVP01_1471500	Plasmodium exported protein, unknown function	OG0005354	3	NA	NA	PcyM_1478100	PCYB_147800	NA	FALSE
PVP01_1215100	conserved Plasmodium protein, unknown function	OG0004471	5	PBANKA_1353100	PF3D7_1339700	PcyM_1217200	PCYB_122350	conserved Plasmodium protein, unknown function	TRUE
PVP01_0840600	PIR protein	NA	NA	NA	NA	NA	NA	NA	FALSE
PVP01_0008840	PIR protein	NA	NA	NA	NA	NA	NA	NA	FALSE
PVP01_0211000	L-seryl-tRNA(Sec) kinase, putative	OG0000794	5	PBANKA_0209400	PF3D7_0103700	PcyM_0214200	PCYB_022020	L-seryl-tRNA(Sec) kinase, putative	FALSE
PVP01_0004500	PIR protein	NA	NA	NA	NA	NA	NA	NA	FALSE
PVP01_0603100	26S proteasome regulatory subunit p55, putative	OG0001014	5	PBANKA_0502200	PF3D7_1017900	PcyM_0603300	PCYB_061220	26S proteasome regulatory subunit p55, putative	FALSE
PVP01_1314000	clathrin light chain, putative	OG0003916	5	PBANKA_1009300	PF3D7_1435500	PcyM_1316000	PCYB_132340	clathrin light chain, putative	TRUE
PVP01_0935300	alpha/beta hydrolase, putative	OG0001624	5	PBANKA_0913900	PF3D7_1134500	PcyM_0939300	PCYB_094040	alpha/beta hydrolase, putative	TRUE
PVP01_0702000	conserved protein, unknown function	OG0001005	5	PBANKA_0417800	PF3D7_0903600	PcyM_0701300	PCYB_071140	conserved protein, unknown function	FALSE
PVP01_0001160	PIR protein	NA	NA	NA	NA	NA	NA	NA	FALSE
PVP01_0001310	PIR protein	NA	NA	NA	NA	NA	NA	NA	FALSE
PVP01_1249300	conserved Plasmodium protein, unknown function	OG0004361	5	PBANKA_1321300	PF3D7_1457600	PcyM_1255800	PCYB_125750	conserved Plasmodium protein, unknown function	TRUE
PVP01_1131900	BFR1 domain-containing protein, putative	OG0002091	5	PBANKA_1116800	PF3D7_0617200	PcyM_1133400	PCYB_113990	BFR1 domain-containing protein, putative	TRUE
PVP01_0317800	protein pelota homolog, putative	OG0001237	5	PBANKA_0619600	PF3D7_0722100	PcyM_0322400	PCYB_032590	protein pelota homolog, putative	TRUE
PVP01_0002780	Plasmodium exported protein, unknown function, pseudogene	NA	NA	NA	NA	NA	NA	NA	FALSE
PVP01_1214200	RNA lariat debranching enzyme, putative	OG0002797	5	PBANKA_1354000	PF3D7_1340600	PcyM_1216200	PCYB_122270	RNA lariat debranching enzyme, putative	FALSE
PVP01_1449900	conserved protein, unknown function	OG0003127	5	PBANKA_1446400	PF3D7_1231700	PcyM_1454300	PCYB_145730	conserved protein, unknown function	FALSE
PVP01_1146200	conserved Plasmodium protein, unknown function	OG0003247	5	PBANKA_0101500	PF3D7_0602700	PcyM_1149300	PCYB_115370	conserved Plasmodium protein, unknown function	TRUE
PVP01_0002300	PIR protein	NA	NA	NA	NA	NA	NA	NA	FALSE
PVP01_1103600	ribosomal protein L1, putative	OG0004150	5	PBANKA_1144300	PF3D7_1368400	PcyM_1102800	PCYB_111210	ribosomal protein L1, putative	TRUE
PVP01_1239200	conserved Plasmodium protein, unknown function	OG0004394	5	PBANKA_1330900	PF3D7_1467600	PcyM_1245100	PCYB_124740	conserved Plasmodium protein, unknown function	TRUE
PVP01_0724800	protein kinase, putative	OG0000442	5	PBANKA_0827100	PF3D7_0926300	PcyM_0725700	PCYB_073390	protein kinase, putative	FALSE
PVP01_1470800	PIR protein	OG0005537	3	NA	NA	PcyM_1477700	PCYB_147780	NA	FALSE
PVP01_1001200	PIR protein	NA	NA	NA	NA	NA	NA	NA	FALSE
PVP01_0930400	conserved Plasmodium protein, unknown function	OG0003813	5	PBANKA_0918400	PF3D7_1129800	PcyM_0934300	PCYB_093590	conserved Plasmodium protein, unknown function	FALSE
PVP01_0726650	conserved Plasmodium protein, unknown function	OG0004889	3	PBANKA_0828950	PF3D7_0928150	NA	NA	conserved Plasmodium protein, unknown function	TRUE
PVP01_0006630	Plasmodium exported protein, unknown function	NA	NA	NA	NA	NA	NA	NA	FALSE
PVP01_1012400	ribosomal large subunit pseudouridylate synthase, putative	OG0002463	5	PBANKA_1236100	PF3D7_0521500	PcyM_1010300	PCYB_102020	ribosomal large subunit pseudouridylate synthase, putative	FALSE
PVP01_0008640	PIR protein	NA	NA	NA	NA	NA	NA	NA	FALSE
PVP01_1133100	pyridoxal kinase, putative	OG0002424	5	PBANKA_1230800	PF3D7_0616000	PcyM_1134600	PCYB_114110	pyridoxal kinase	FALSE
PVP01_1414300	DEAD box helicase, putative	OG0002919	5	PBANKA_1411800	PF3D7_1313400	PcyM_1415100	PCYB_142280	DEAD box helicase, putative	FALSE
PVP01_0804600	conserved protein, unknown function	OG0002269	5	PBANKA_1203200	PF3D7_1004900	PcyM_0804300	PCYB_081420	conserved protein, unknown function	FALSE
PVP01_0817600	conserved Plasmodium protein, unknown function	OG0004204	5	PBANKA_1215900	PF3D7_0322600	PcyM_0818700	PCYB_082720	conserved Plasmodium protein, unknown function	TRUE
PVP01_1207700	DNA topoisomerase 3, putative	OG0000597	5	PBANKA_1360000	PF3D7_1347100	PcyM_1209300	PCYB_121660	DNA topoisomerase 3	FALSE
PVP01_1438200	conserved Plasmodium protein, unknown function	OG0004833	4	PBANKA_1435000	PF3D7_1219800	PcyM_1439900	NA	conserved Plasmodium protein, unknown function	FALSE
PVP01_0200400	PIR protein	NA	NA	NA	NA	NA	NA	NA	FALSE
PVP01_0001340	PIR protein, fragment	NA	NA	NA	NA	NA	NA	NA	FALSE
PVP01_0009920	PIR protein	NA	NA	NA	NA	NA	NA	NA	FALSE
PVP01_1031900	4-diphosphocytidyl-2-C-methyl-D-erythritol kinase, putative	OG0004021	5	PBANKA_1102800	PF3D7_0503100	PcyM_1032600	PCYB_103980	4-diphosphocytidyl-2-C-methyl-D-erythritol kinase, putative	FALSE
PVP01_0902700	hypothetical protein	NA	NA	NA	NA	NA	NA	NA	FALSE
PVP01_0700150	conserved Plasmodium protein, unknown function, pseudogene	NA	NA	NA	NA	NA	NA	NA	FALSE
PVP01_0210600	protein E140, putative	OG0003293	5	PBANKA_0209000	PF3D7_0104100	PcyM_0213800	PCYB_021980	protein E140, putative	TRUE
PVP01_1101700	conserved Plasmodium protein, unknown function	OG0005104	3	NA	NA	PcyM_1100700	PCYB_111070	NA	FALSE
PVP01_1459800	40S ribosomal protein S17, putative	OG0003178	5	PBANKA_1456100	PF3D7_1242700	PcyM_1466000	PCYB_146730	40S ribosomal protein S17, putative	FALSE
PVP01_0004950	PIR protein	NA	NA	NA	NA	NA	NA	NA	FALSE
PVP01_0913100	conserved Plasmodium protein, unknown function	OG0003855	5	PBANKA_0935300	PF3D7_1112300	PcyM_0914500	PCYB_091860	conserved Plasmodium protein, unknown function	FALSE
PVP01_0003260	PIR protein	NA	NA	NA	NA	NA	NA	NA	FALSE
PVP01_0006420	PIR protein	NA	NA	NA	NA	NA	NA	NA	FALSE
PVP01_1468300	coronin, putative	OG0003225	5	PBANKA_1464100	PF3D7_1251200	PcyM_1475300	PCYB_147560	coronin	FALSE
PVP01_0601100	Plasmodium exported protein, unknown function, pseudogene	NA	NA	NA	NA	NA	NA	NA	FALSE
PVP01_1218000	parasitophorous vacuolar protein 3, putative	OG0005569	2	NA	NA	PcyM_1220700	NA	NA	TRUE
PVP01_1455800	conserved protein, unknown function	OG0004678	5	PBANKA_1452300	PF3D7_1237700	PcyM_1461800	PCYB_146340	conserved protein, unknown function	FALSE
PVP01_1329100	glutathione reductase, putative	OG0000303	5	PBANKA_1023400	PF3D7_1419800	PcyM_1334400	PCYB_133740	glutathione reductase	TRUE
PVP01_1402600	conserved Plasmodium protein, unknown function	OG0005230	3	NA	NA	PcyM_1403100	PCYB_141110	NA	FALSE
PVP01_0622000	TFIIH basal transcription factor complex helicase XPB subunit, putative	OG0001114	5	PBANKA_0520500	PF3D7_1037600	PcyM_0627000	PCYB_063130	TFIIH basal transcription factor complex helicase XPB subunit, putative	FALSE
PVP01_1232800	protein transport protein SFT2, putative	OG0002714	5	PBANKA_1337200	PF3D7_1321800	PcyM_1237700	PCYB_124100	protein transport protein SFT2, putative	TRUE
PVP01_1120600	RAP protein, putative	OG0004104	5	PBANKA_1127900	PF3D7_0628900	PcyM_1121200	PCYB_112910	RAP protein, putative	FALSE
PVP01_1438800	debranching enzyme-associated ribonuclease, putative	OG0003066	5	PBANKA_1435600	PF3D7_1220400	PcyM_1440500	PCYB_144620	debranching enzyme-associated ribonuclease, putative	FALSE
PVP01_1325100	small nucleolar RNA snoR23	NA	NA	NA	NA	NA	NA	NA	FALSE
PVP01_1202000	vacuolar fusion protein MON1, putative	OG0002858	5	PBANKA_1365400	PF3D7_1352800	PcyM_1203200	PCYB_121090	vacuolar fusion protein MON1, putative	FALSE
PVP01_0829000	valine--tRNA ligase, putative	OG0003384	5	PBANKA_0409200	PF3D7_0311200	PcyM_0832000	PCYB_083830	valine--tRNA ligase, putative	FALSE
PVP01_0009910	PIR protein	NA	NA	NA	NA	NA	NA	NA	FALSE
PVP01_0004720	PIR protein	NA	NA	NA	NA	NA	NA	NA	FALSE
PVP01_1210200	lipoyl synthase, putative	OG0002822	5	PBANKA_1357500	PF3D7_1344600	PcyM_1211900	PCYB_121910	lipoyl synthase	FALSE
PVP01_0302300	regulator of chromosome condensation, putative	OG0001804	5	PBANKA_1000700	PF3D7_0403100	PcyM_0304800	PCYB_031070	regulator of chromosome condensation, putative	FALSE
PVP01_0007160	PIR protein	NA	NA	NA	NA	NA	NA	NA	FALSE
PVP01_0532400	cysteine-rich protective antigen, putative	OG0005074	4	NA	PF3D7_0423800	PcyM_0533700	PCYB_053730	cysteine-rich protective antigen	FALSE
PVP01_1428100	GTP-binding protein YihA3, putative	OG0003009	5	PBANKA_1425350	PF3D7_0812220	PcyM_1429400	PCYB_143600	GTP-binding protein YihA3	FALSE
PVP01_0903600	hypothetical protein	NA	NA	NA	NA	NA	NA	NA	FALSE
PVP01_0621000	conserved protein, unknown function	OG0001108	5	PBANKA_0519600	PF3D7_1036600	PcyM_0625900	PCYB_063020	conserved protein, unknown function	FALSE
PVP01_0836000	EH domain-containing protein, putative	OG0000923	5	PBANKA_0402800	PF3D7_0304200	PcyM_0840100	PCYB_084500	EH domain-containing protein	FALSE
PVP01_1138500	conserved Plasmodium protein, unknown function	OG0004760	4	PBANKA_0109000	PF3D7_0610700	PcyM_1140700	NA	conserved Plasmodium protein, unknown function	FALSE
PVP01_1016200	doublecortin domain-containing protein, putative	OG0002439	5	PBANKA_1232600	PF3D7_0517800	PcyM_1014400	PCYB_102400	doublecortin domain-containing protein, putative	FALSE
PVP01_0217400	PIR protein	NA	NA	NA	NA	NA	NA	NA	FALSE
PVP01_0530000	conserved Plasmodium protein, unknown function	OG0003476	5	PBANKA_0521900	PF3D7_0420500	PcyM_0530800	PCYB_053490	conserved Plasmodium protein, unknown function	FALSE
PVP01_0529100	apical merozoite protein	OG0001381	5	PBANKA_0721800	PF3D7_0419700	PcyM_0529800	PCYB_053400	apical merozoite protein	TRUE
PVP01_1404700	conserved Plasmodium protein, unknown function	OG0002867	5	PBANKA_1402300	PF3D7_1303800	PcyM_1405300	PCYB_141330	conserved Plasmodium protein, unknown function	TRUE
PVP01_0009790	PIR protein	NA	NA	NA	NA	NA	NA	NA	FALSE
PVP01_0504600	5.8S ribosomal RNA	NA	NA	NA	NA	NA	NA	NA	FALSE
PVP01_1259900	conserved Plasmodium protein, unknown function	OG0004329	5	PBANKA_1310900	PF3D7_1447100	PcyM_1268700	PCYB_126800	conserved Plasmodium protein, unknown function	TRUE
PVP01_0933300	amino acid transporter, putative	OG0003803	5	PBANKA_0915900	PF3D7_1132500	PcyM_0937400	PCYB_093850	amino acid transporter, putative	FALSE
PVP01_0111400	AAA family ATPase, CDC48 subfamily, putative	NA	NA	NA	NA	NA	NA	NA	FALSE
PVP01_0901550	hypothetical protein, pseudogene	NA	NA	NA	NA	NA	NA	NA	FALSE
PVP01_1471400	reticulocyte binding protein 2, pseudogene	NA	NA	NA	NA	NA	NA	NA	FALSE
PVP01_1216000	conserved protein, unknown function	OG0002791	5	PBANKA_1352400	PF3D7_1338700	PcyM_1218300	PCYB_122420	conserved protein, unknown function	FALSE
PVP01_1447500	macrophage migration inhibitory factor, putative	OG0003115	5	PBANKA_1444000	PF3D7_1229400	PcyM_1451400	PCYB_145500	macrophage migration inhibitory factor	TRUE
PVP01_0421400	protein MAK16, putative	OG0000829	5	PBANKA_0301500	PF3D7_0203700	PcyM_0421300	PCYB_042650	protein MAK16, putative	FALSE
PVP01_0736600	Plasmodium exported protein, unknown function	NA	NA	NA	NA	NA	NA	NA	FALSE
PVP01_0010900	PIR protein	NA	NA	NA	NA	NA	NA	NA	FALSE
PVP01_0936700	conserved Plasmodium protein, unknown function	OG0003793	5	PBANKA_0912800	PF3D7_1135800	PcyM_0940700	PCYB_094170	conserved Plasmodium protein, unknown function	FALSE
PVP01_0319800	conserved Plasmodium protein, unknown function	OG0003551	5	PBANKA_0621600	PF3D7_0724100	PcyM_0324700	PCYB_032790	conserved Plasmodium protein, unknown function	TRUE
PVP01_1466200	conserved protein, unknown function	OG0003213	5	PBANKA_1462000	PF3D7_1249100	PcyM_1473000	PCYB_147350	conserved protein, unknown function	FALSE
PVP01_0202600	Plasmodium exported protein (PHIST), unknown function	OG0005300	3	NA	NA	PcyM_0203900	PCYB_021230	NA	FALSE
PVP01_1240200	enkurin domain-containing protein, putative	OG0002674	5	PBANKA_1330000	PF3D7_1466600	PcyM_1246200	PCYB_124840	enkurin domain-containing protein, putative	FALSE
PVP01_0527600	eukaryotic translation initiation factor 3 subunit M, putative	OG0001373	5	PBANKA_0720300	PF3D7_0418200	PcyM_0528200	PCYB_053250	eukaryotic translation initiation factor 3 subunit M, putative	FALSE
PVP01_1245800	conserved Plasmodium protein, unknown function	OG0004371	5	PBANKA_1324700	PF3D7_1461000	PcyM_1252200	PCYB_125400	conserved Plasmodium protein, unknown function	FALSE
PVP01_1115500	phosphatase 2A regulatory subunit-related protein, putative	OG0002179	5	PBANKA_1132700	PF3D7_1356400	PcyM_1115300	PCYB_112410	phosphatase 2A regulatory subunit-related protein, putative	FALSE
PVP01_1003800	SNARE protein, putative	OG0002506	5	PBANKA_1244500	PF3D7_0530100	PcyM_1001500	PCYB_101180	SNARE protein, putative	FALSE
PVP01_0711400	conserved protein, unknown function	OG0001453	5	PBANKA_0814000	PF3D7_0913000	PcyM_0711200	PCYB_072070	conserved protein, unknown function	FALSE
PVP01_0503300	PIR protein, pseudogene	NA	NA	NA	NA	NA	NA	NA	FALSE
PVP01_0421500	conserved Plasmodium protein, unknown function	OG0003314	5	PBANKA_0301400	PF3D7_0203600	PcyM_0421400	PCYB_042660	conserved Plasmodium protein, unknown function	FALSE
PVP01_1460700	translation initiation factor SUI1, putative	OG0000645	5	PBANKA_1456900	PF3D7_1243600	PcyM_1466900	PCYB_146820	translation initiation factor SUI1, putative	TRUE
PVP01_1264900	replication factor A protein 3, putative	OG0004314	5	PBANKA_1306000	PF3D7_1442100	PcyM_1273800	PCYB_127300	replication factor A protein 3, putative	TRUE
PVP01_0514400	U6 snRNA-associated Sm-like protein LSm3, putative	OG0001322	5	PBANKA_0710900	PF3D7_0819900	PcyM_0514200	PCYB_052130	U6 snRNA-associated Sm-like protein LSm3, putative	FALSE
PVP01_0410600	conserved Plasmodium protein, unknown function	OG0005070	3	NA	NA	PcyM_0408200	PCYB_041590	NA	FALSE
PVP01_1029700	conserved Plasmodium protein, unknown function	OG0004023	5	PBANKA_1103900	PF3D7_0504300	PcyM_1029800	PCYB_103730	conserved Plasmodium protein, unknown function	FALSE
PVP01_0835100	conserved Plasmodium protein, unknown function	OG0003371	5	PBANKA_0403600	PF3D7_0305100	PcyM_0839200	PCYB_084410	conserved Plasmodium protein, unknown function	FALSE
PVP01_1029000	MMS19-like protein, putative	OG0002026	5	PBANKA_1104600	PF3D7_0505000	PcyM_1029100	PCYB_103660	MMS19-like protein, putative	FALSE
PVP01_0513900	conserved Plasmodium protein, unknown function	OG0001319	5	PBANKA_0710400	PF3D7_0820400	PcyM_0513700	PCYB_052080	conserved Plasmodium protein, unknown function	FALSE
PVP01_1218600	conserved Plasmodium protein, unknown function	OG0004462	5	PBANKA_1349900	PF3D7_1336000	PcyM_1221300	PCYB_122670	conserved Plasmodium protein, unknown function	TRUE
PVP01_0004190	PIR protein	NA	NA	NA	NA	NA	NA	NA	FALSE
PVP01_1335900	conserved Plasmodium protein, unknown function	OG0003980	5	PBANKA_1029600	PF3D7_1413000	PcyM_1342100	PCYB_134370	conserved Plasmodium protein, unknown function	FALSE
PVP01_1450900	conserved protein, unknown function	NA	NA	NA	NA	NA	NA	NA	TRUE
PVP01_1252600	aminopeptidase P, putative	OG0002610	5	PBANKA_1318100	PF3D7_1454400	PcyM_1260600	PCYB_126090	aminopeptidase P	FALSE
PVP01_0400800	PIR protein	NA	NA	NA	NA	NA	NA	NA	FALSE
PVP01_0010300	Plasmodium exported protein, unknown function	NA	NA	NA	NA	NA	NA	NA	FALSE
PVP01_0010830	Plasmodium exported protein, unknown function	NA	NA	NA	NA	NA	NA	NA	FALSE
PVP01_1337600	DnaJ protein, putative	OG0001959	5	PBANKA_1031200	PF3D7_1411300	PcyM_1344100	PCYB_134540	DnaJ protein, putative	FALSE
PVP01_0116400	proteasome subunit beta type-4, putative	OG0002395	5	PBANKA_1226500	PF3D7_0803800	PcyM_0118600	PCYB_012310	proteasome subunit beta type-4	FALSE
PVP01_1028600	conserved protein, unknown function	OG0002029	5	PBANKA_1105000	PF3D7_0505400	PcyM_1028700	PCYB_103620	conserved protein, unknown function	FALSE
PVP01_0000790	PIR protein	NA	NA	NA	NA	NA	NA	NA	FALSE
PVP01_1133300	conserved oligomeric Golgi complex subunit 4, putative	OG0002423	5	PBANKA_1230600	PF3D7_0615800	PcyM_1134800	PCYB_114130	conserved oligomeric Golgi complex subunit 4, putative	FALSE
PVP01_0911700	ES2 protein, putative	OG0001762	5	PBANKA_0936700	PF3D7_1110900	PcyM_0912900	PCYB_091720	ES2 protein, putative	FALSE
PVP01_1440800	AP2 domain transcription factor AP2-G, putative	OG0003078	5	PBANKA_1437500	PF3D7_1222600	PcyM_1442600	PCYB_144830	AP2 domain transcription factor AP2-G	TRUE
PVP01_0829700	ATP-dependent RNA helicase DHX57, putative	OG0004913	4	NA	PF3D7_0310500	PcyM_0832900	PCYB_083900	ATP-dependent RNA helicase DHX57, putative	FALSE
PVP01_0004410	PIR protein	NA	NA	NA	NA	NA	NA	NA	FALSE
PVP01_1309500	conserved Plasmodium protein, unknown function	OG0003514	5	PBANKA_0608700	PF3D7_1210300	PcyM_1311100	PCYB_131900	conserved Plasmodium protein, unknown function	TRUE
PVP01_0806700	transmembrane protein 147, putative	OG0002281	5	PBANKA_1205200	PF3D7_1007000	PcyM_0806500	PCYB_081630	transmembrane protein 147, putative	FALSE
PVP01_0704900	dynein intermediate light chain, putative	OG0000989	5	PBANKA_0414900	PF3D7_0906400	PcyM_0704300	PCYB_071430	dynein intermediate light chain, putative	FALSE
PVP01_1235100	conserved Plasmodium protein, unknown function	NA	NA	NA	NA	NA	NA	NA	FALSE
PVP01_0505600	GPI-anchored micronemal antigen	OG0001263	5	PBANKA_0701900	PF3D7_0828800	PcyM_0504400	PCYB_051250	GPI-anchored micronemal antigen	TRUE
PVP01_0106000	cysteine-rich secretory protein, putative	OG0004946	4	NA	PF3D7_0705800	PcyM_0106400	PCYB_011320	cysteine-rich secretory protein, putative	FALSE
PVP01_1262700	1-acyl-sn-glycerol-3-phosphate acyltransferase, putative	OG0000321	5	PBANKA_1308200	PF3D7_1444300	PcyM_1271500	PCYB_127080	1-acyl-sn-glycerol-3-phosphate acyltransferase, putative	TRUE
PVP01_0919000	haloacid dehalogenase-like hydrolase, putative	OG0003839	5	PBANKA_0929700	PF3D7_1118400	PcyM_0920900	PCYB_092450	haloacid dehalogenase-like hydrolase, putative	FALSE
PVP01_1406800	conserved Plasmodium protein, unknown function	OG0004527	5	PBANKA_1404400	PF3D7_1305900	PcyM_1407400	PCYB_141540	conserved Plasmodium protein, unknown function	FALSE
PVP01_1017000	60S ribosomal protein L12, putative	OG0002432	5	PBANKA_1231800	PF3D7_0517000	PcyM_1015400	PCYB_102480	60S ribosomal protein L12, putative	FALSE
PVP01_0003100	PIR protein	NA	NA	NA	NA	NA	NA	NA	FALSE
PVP01_1001000	PIR protein	NA	NA	NA	NA	NA	NA	NA	FALSE
PVP01_1241500	ribonuclease Z, putative	OG0002666	5	PBANKA_1328700	PF3D7_1465300	PcyM_1247500	PCYB_124970	ribonuclease Z, putative	FALSE
PVP01_0419400	RNA-binding protein, putative	OG0000371	5	PBANKA_0303400	PF3D7_0205700	PcyM_0419200	PCYB_042450	RNA-binding protein, putative	FALSE
PVP01_1260100	glutaminyl-peptide cyclotransferase, putative	OG0002564	5	PBANKA_1310700	PF3D7_1446900	PcyM_1268900	PCYB_126820	glutaminyl-peptide cyclotransferase, putative	TRUE
PVP01_0402200	PIR protein	NA	NA	NA	NA	NA	NA	NA	FALSE
PVP01_1129100	merozoite surface protein 10, putative	OG0004077	5	PBANKA_1119600	PF3D7_0620400	PcyM_1130200	PCYB_113710	merozoite surface protein 10	TRUE
PVP01_0001460	PIR protein	OG0000341	3	NA	NA	PcyM_0056800	PCYB_002630	NA	FALSE
PVP01_0835900	conserved Plasmodium protein, unknown function	OG0003367	5	PBANKA_0402900	PF3D7_0304300	PcyM_0840000	PCYB_084490	conserved Plasmodium protein, unknown function	FALSE
PVP01_0410300	serine/threonine protein kinase STK2, putative	OG0003348	5	PBANKA_0311400	PF3D7_0214600	PcyM_0407900	PCYB_041560	serine/threonine protein kinase STK2, putative	TRUE
PVP01_1406600	conserved Plasmodium protein, unknown function	OG0004525	5	PBANKA_1404200	PF3D7_1305700	PcyM_1407200	PCYB_141520	conserved Plasmodium protein, unknown function	FALSE
PVP01_0831400	conserved protein, unknown function	OG0000950	5	PBANKA_0407000	PF3D7_0308800	PcyM_0835200	PCYB_084060	conserved protein, unknown function	FALSE
PVP01_1232400	TOG domain-containing protein, putative	OG0002717	5	PBANKA_1337500	PF3D7_1322200	PcyM_1237200	PCYB_124060	TOG domain-containing protein, putative	FALSE
PVP01_0914100	UDP-galactose transporter, putative	OG0000475	5	PBANKA_0934300	PF3D7_1113300	PcyM_0915700	PCYB_091960	UDP-galactose transporter, putative	TRUE
PVP01_0008680	Plasmodium exported protein, unknown function	NA	NA	NA	NA	NA	NA	NA	FALSE
PVP01_0512900	conserved Plasmodium protein, unknown function	OG0003570	5	PBANKA_0709400	PF3D7_0821400	PcyM_0512400	PCYB_051980	conserved Plasmodium protein, unknown function	TRUE
PVP01_0309100	zinc finger protein, putative	OG0001834	5	PBANKA_1007400	PF3D7_0409800	PcyM_0312400	PCYB_031750	zinc finger protein, putative	TRUE
PVP01_1436000	multiple RNA-binding domain-containing protein 1, putative	OG0003050	5	PBANKA_1432800	PF3D7_1217200	PcyM_1437500	PCYB_144350	multiple RNA-binding domain-containing protein 1, putative	FALSE
PVP01_0209300	conserved protein, unknown function	OG0000786	5	PBANKA_0207800	PF3D7_0105500	PcyM_0212200	PCYB_021850	conserved protein, unknown function	FALSE
PVP01_0826500	conserved Plasmodium protein, unknown function	OG0000976	5	PBANKA_0411400	PF3D7_0313700	PcyM_0828600	PCYB_083610	conserved Plasmodium protein, unknown function	FALSE
PVP01_0004620	PIR protein	NA	NA	NA	NA	NA	NA	NA	FALSE
PVP01_1318400	ribosomal protein L17, mitochondrial, putative	OG0001870	5	PBANKA_1013700	PF3D7_1431000	PcyM_1321400	PCYB_132770	ribosomal protein L17, mitochondrial, putative	FALSE
PVP01_1470300	Plasmodium exported protein (PHIST), unknown function	OG0005353	3	NA	NA	PcyM_1477300	PCYB_147730	NA	FALSE
PVP01_1302000	AATF domain-containing protein, putative	OG0003489	5	PBANKA_0601700	PF3D7_1202700	PcyM_1302500	PCYB_131150	AATF domain-containing protein, putative	FALSE
PVP01_1004900	conserved protein, unknown function	OG0004284	5	PBANKA_1243500	PF3D7_0528900	PcyM_1002600	PCYB_101280	conserved protein, unknown function	FALSE
PVP01_0941400	chromo domain-containing protein, putative	OG0003775	5	PBANKA_0908300	PF3D7_1140700	PcyM_0945400	PCYB_094620	chromo domain-containing protein, putative	TRUE
PVP01_1250900	AP2 domain transcription factor, putative	OG0004354	5	PBANKA_1319700	PF3D7_1456000	PcyM_1257500	PCYB_125910	AP2 domain transcription factor, putative	FALSE
PVP01_0603550	conserved Plasmodium protein, unknown function	NA	NA	NA	NA	NA	NA	NA	FALSE
PVP01_1005700	AP-1/2 complex subunit beta, putative	OG0002495	5	PBANKA_1242700	PF3D7_0528100	PcyM_1003400	PCYB_101360	AP-1/2 complex subunit beta, putative	TRUE
PVP01_0833600	ATP synthase-associated protein, putative	OG0000937	5	PBANKA_0405000	PF3D7_0306600	PcyM_0837600	PCYB_084260	ATP synthase-associated protein, putative	FALSE
PVP01_1026600	subtilisin propeptide-like protein, putative	OG0004032	5	PBANKA_1107000	PF3D7_0507400	PcyM_1026600	PCYB_103420	subtilisin propeptide-like protein	FALSE
PVP01_1403600	ATP-dependent RNA helicase DHR1, putative	OG0002861	5	PBANKA_1401200	PF3D7_1302700	PcyM_1404100	PCYB_141220	ATP-dependent RNA helicase DHR1, putative	TRUE
PVP01_1131700	histone H2A, putative	OG0002093	5	PBANKA_1117000	PF3D7_0617800	PcyM_1133000	PCYB_113970	histone H2A	TRUE
PVP01_0005690	PIR protein	NA	NA	NA	NA	NA	NA	NA	FALSE
PVP01_0303000	pre-mRNA-splicing factor CLF1, putative	OG0001806	5	PBANKA_1001400	PF3D7_0403700	PcyM_0305500	PCYB_031140	pre-mRNA-splicing factor CLF1, putative	FALSE
PVP01_1021900	conserved protein, unknown function	OG0002062	5	PBANKA_1111700	PF3D7_0512100	PcyM_1021000	PCYB_102960	conserved protein, unknown function	FALSE
PVP01_0009930	Plasmodium exported protein, unknown function	NA	NA	NA	NA	NA	NA	NA	FALSE
PVP01_0941700	conserved Plasmodium protein, unknown function	OG0003773	5	PBANKA_0908000	PF3D7_1141000	PcyM_0945700	PCYB_094650	conserved Plasmodium protein, unknown function	FALSE
PVP01_1028700	UDP-N-acetylglucosamine transporter, putative	OG0002028	5	PBANKA_1104900	PF3D7_0505300	PcyM_1028800	PCYB_103630	UDP-N-acetylglucosamine transporter, putative	TRUE
PVP01_0816000	enolase, putative	OG0000538	5	PBANKA_1214300	PF3D7_1015900	PcyM_0816700	PCYB_082570	enolase	FALSE
PVP01_0008850	Plasmodium exported protein, unknown function	NA	NA	NA	NA	NA	NA	NA	FALSE
PVP01_1000800	PIR protein	NA	NA	NA	NA	NA	NA	NA	FALSE
PVP01_0009230	PIR protein	NA	NA	NA	NA	NA	NA	NA	FALSE
PVP01_1454500	conserved Plasmodium protein, unknown function	OG0004673	5	PBANKA_1451000	PF3D7_1236400	PcyM_1460400	PCYB_146210	conserved Plasmodium protein, unknown function	FALSE
PVP01_1439800	heptatricopeptide repeat-containing protein, putative	OG0003072	5	PBANKA_1436700	PF3D7_1221500	PcyM_1441600	PCYB_144730	heptatricopeptide repeat-containing protein, putative	FALSE
PVP01_0712500	conserved Plasmodium protein, unknown function	OG0003675	5	PBANKA_0815100	PF3D7_0914100	PcyM_0712300	PCYB_072170	conserved Plasmodium protein, unknown function	TRUE
PVP01_0007900	PIR protein	NA	NA	NA	NA	NA	NA	NA	FALSE
PVP01_0420700	dynein light chain, putative	OG0000834	5	PBANKA_0302200	PF3D7_0204400	PcyM_0420400	PCYB_042580	dynein light chain, putative	FALSE
PVP01_0900800	PIR protein	OG0004867	3	NA	NA	PcyM_0902800	PCYB_004100	NA	FALSE
PVP01_0714700	conserved Plasmodium protein, unknown function	OG0003683	5	PBANKA_0817300	PF3D7_0916300	PcyM_0714500	PCYB_072390	conserved Plasmodium protein, unknown function	TRUE
PVP01_1134900	cytosolic Fe-S cluster assembly factor NAR1, putative	OG0000745	5	PBANKA_0112400	PF3D7_0614200	PcyM_1136600	PCYB_114290	cytosolic Fe-S cluster assembly factor NAR1, putative	TRUE
PVP01_0819100	conserved Plasmodium protein, unknown function	OG0004212	5	PBANKA_1217400	PF3D7_0321100	PcyM_0820600	PCYB_082870	conserved Plasmodium protein, unknown function	TRUE
PVP01_0609400	RNA-binding protein, putative	OG0001046	5	PBANKA_0508400	PF3D7_1024200	PcyM_0611600	PCYB_061850	RNA-binding protein, putative	TRUE
PVP01_1427500	U1 small nuclear ribonucleoprotein C, putative	OG0003005	5	PBANKA_1424800	PF3D7_0812700	PcyM_1428700	PCYB_143550	U1 small nuclear ribonucleoprotein C, putative	FALSE
PVP01_1226800	nicotinamide/nicotinic acid mononucleotide adenylyltransferase, putative	OG0002743	5	PBANKA_1342800	PF3D7_1327600	PcyM_1230700	PCYB_123500	nicotinamide/nicotinic acid mononucleotide adenylyltransferase	FALSE
PVP01_0109100	heat shock protein 110, putative	OG0002358	5	PBANKA_1219300	PF3D7_0708800	PcyM_0109900	PCYB_011590	heat shock protein 110	TRUE
PVP01_0303700	6-cysteine protein P36, putative	OG0003887	5	PBANKA_1002100	PF3D7_0404400	PcyM_0306400	PCYB_031210	6-cysteine protein P36	TRUE
PVP01_0614100	conserved Plasmodium protein, unknown function	OG0005078	3	NA	NA	PcyM_0617700	PCYB_062320	NA	TRUE
PVP01_1256200	conserved protein, unknown function	OG0002592	5	PBANKA_1314500	PF3D7_1450800	PcyM_1264500	PCYB_126430	conserved protein, unknown function	FALSE
PVP01_0618000	RNA polymerase II-associated protein 1, putative	OG0003466	5	PBANKA_0516700	PF3D7_1032900	PcyM_0622300	PCYB_062720	RNA polymerase II-associated protein 1, putative	FALSE
PVP01_1327800	conserved Plasmodium protein, unknown function	OG0003956	5	PBANKA_1022100	PF3D7_1421100	PcyM_1332700	PCYB_133610	conserved Plasmodium protein, unknown function	TRUE
PVP01_1106200	conserved Plasmodium protein, unknown function	OG0000526	5	PBANKA_1141600	PF3D7_1365800	PcyM_1105500	PCYB_111480	conserved Plasmodium protein, unknown function	TRUE
PVP01_0836400	IBR domain protein, putative	OG0000920	5	PBANKA_0402400	PF3D7_0303800	PcyM_0840500	PCYB_084540	IBR domain protein, putative	FALSE
PVP01_0949600	PIR protein	NA	NA	NA	NA	NA	NA	NA	FALSE
PVP01_0419300	PH domain-containing protein, putative	OG0000841	5	PBANKA_0303500	PF3D7_0205800	PcyM_0419100	PCYB_042440	PH domain-containing protein, putative	FALSE
PVP01_0208400	pre-rRNA-processing protein TSR2, putative	OG0000779	5	PBANKA_0206900	PF3D7_0106400	PcyM_0211200	PCYB_021760	pre-rRNA-processing protein TSR2, putative	FALSE
PVP01_1207900	conserved Plasmodium protein, unknown function	OG0004496	5	PBANKA_1359800	PF3D7_1346900	PcyM_1209500	PCYB_121680	conserved Plasmodium protein, unknown function	TRUE
PVP01_0005580	Plasmodium exported protein, unknown function	NA	NA	NA	NA	NA	NA	NA	FALSE
PVP01_1408800	conserved Plasmodium protein, unknown function	OG0005571	2	NA	NA	PcyM_1409400	NA	NA	FALSE
PVP01_0729700	elongation factor Tu, putative	OG0003733	5	PBANKA_0831800	PF3D7_0931000	PcyM_0732100	PCYB_073850	elongation factor Tu, putative	FALSE
PVP01_1427300	protein KIC7, putative	OG0003003	5	PBANKA_1424600	PF3D7_0813000	PcyM_1428500	PCYB_143530	protein KIC7	TRUE
PVP01_1310400	conserved Plasmodium protein, unknown function	OG0003518	5	PBANKA_0609700	PF3D7_1211200	PcyM_1312000	PCYB_131990	conserved Plasmodium protein, unknown function	FALSE
PVP01_1140800	conserved Plasmodium protein, unknown function	OG0003262	5	PBANKA_0106800	PF3D7_0608200	PcyM_1143800	PCYB_114830	conserved Plasmodium protein, unknown function	TRUE
PVP01_1231900	conserved Plasmodium protein, unknown function	OG0004417	5	PBANKA_1337900	PF3D7_1322700	PcyM_1236700	PCYB_124010	conserved Plasmodium protein, unknown function	FALSE
PVP01_1221300	AMMECR1 domain-containing protein, putative	OG0000591	5	PBANKA_1348100	PF3D7_1333400	PcyM_1224100	PCYB_122940	AMMECR1 domain-containing protein, putative	TRUE
PVP01_1468000	conserved protein, unknown function	OG0003223	5	PBANKA_1463800	PF3D7_1250900	PcyM_1475000	PCYB_147530	conserved protein, unknown function	TRUE
PVP01_1445100	parasitophorous vacuolar protein 2, putative	OG0003102	5	PBANKA_1441700	PF3D7_1226900	PcyM_1447900	PCYB_145260	parasitophorous vacuolar protein 2	FALSE
PVP01_0831800	U4 spliceosomal RNA	NA	NA	NA	NA	NA	NA	NA	FALSE
PVP01_1009700	conserved Plasmodium protein, unknown function	OG0004268	5	PBANKA_1239000	PF3D7_0524200	PcyM_1007600	PCYB_101750	conserved Plasmodium membrane protein, unknown function	TRUE
PVP01_1439300	histone-lysine N-methyltransferase, H3 lysine-4 specific, putative	OG0000627	5	PBANKA_1436200	PF3D7_1221000	PcyM_1441000	PCYB_144680	histone-lysine N-methyltransferase, H3 lysine-4 specific	TRUE
PVP01_1329900	conserved Plasmodium protein, unknown function	OG0003964	5	PBANKA_1024200	PF3D7_1419000	PcyM_1335300	PCYB_133820	conserved Plasmodium protein, unknown function	FALSE
PVP01_0909000	D-tyrosyl-tRNA(Tyr) deacylase, putative	OG0001776	5	PBANKA_0938700	PF3D7_1108200	PcyM_0910200	PCYB_091520	D-tyrosyl-tRNA(Tyr) deacylase	FALSE
PVP01_0003970	PIR protein	NA	NA	NA	NA	NA	NA	NA	FALSE
PVP01_0011150	PIR protein	NA	NA	NA	NA	NA	NA	NA	FALSE
PVP01_1125500	hexokinase, putative	OG0002125	5	PBANKA_1122900	PF3D7_0624000	PcyM_1126200	PCYB_113380	hexokinase	TRUE
PVP01_0705100	zinc finger protein, putative	OG0003402	5	PBANKA_0414700	PF3D7_0906600	PcyM_0704500	PCYB_071450	zinc finger protein, putative	TRUE
PVP01_0608000	4-hydroxy-3-methylbut-2-en-1-yl diphosphate synthase (ferredoxin)	OG0001040	5	PBANKA_0507000	PF3D7_1022800	PcyM_0610000	PCYB_061710	4-hydroxy-3-methylbut-2-en-1-yl diphosphate synthase (ferredoxin), putative	FALSE
PVP01_1134500	conserved Plasmodium protein, unknown function	OG0004248	5	PBANKA_1229300	PF3D7_0614600	PcyM_1136100	PCYB_114250	conserved Plasmodium protein, unknown function	FALSE
PVP01_0209600	heptatricopeptide repeat and RAP domain-containing protein, putative	OG0000789	5	PBANKA_0208100	PF3D7_0105200	PcyM_0212500	PCYB_021880	heptatricopeptide repeat and RAP domain-containing protein, putative	TRUE
PVP01_1337000	p1/s1 nuclease, putative	NA	NA	NA	NA	NA	NA	NA	FALSE
PVP01_0008730	PIR protein	NA	NA	NA	NA	NA	NA	NA	FALSE
PVP01_0512200	mediator of RNA polymerase II transcription subunit 7, putative	OG0001307	5	PBANKA_0708700	PF3D7_0822100	PcyM_0511700	PCYB_051910	mediator of RNA polymerase II transcription subunit 7, putative	FALSE
PVP01_0901800	hypothetical protein	NA	NA	NA	NA	NA	NA	NA	FALSE
PVP01_0220300	Plasmodium exported protein, unknown function	NA	NA	NA	NA	NA	NA	NA	FALSE
PVP01_1312600	histidine triad protein, putative	OG0000291	5	PBANKA_0611900	PF3D7_1436900	PcyM_1314600	PCYB_132210	histidine triad protein, putative	TRUE
PVP01_1320500	conserved Plasmodium protein, unknown function	OG0003933	5	PBANKA_1015800	PF3D7_1428900	PcyM_1323600	PCYB_132980	conserved Plasmodium protein, unknown function	FALSE
PVP01_1145300	AT-rich interactive domain-containing protein, putative	OG0000684	5	PBANKA_0102400	PF3D7_0603600	PcyM_1148400	PCYB_115280	AT-rich interactive domain-containing protein, putative	TRUE
PVP01_1106400	DNA topoisomerase 6 subunit B, putative	OG0002230	5	PBANKA_1141400	PF3D7_1365600	PcyM_1105700	PCYB_111500	DNA topoisomerase 6 subunit B, putative	FALSE
PVP01_0913200	nucleic acid binding protein, putative	OG0003854	5	PBANKA_0935200	PF3D7_1112400	PcyM_0914600	PCYB_091870	nucleic acid binding protein, putative	FALSE
PVP01_1442400	BRO1 domain-containing protein, putative	OG0004632	5	PBANKA_1439100	PF3D7_1224200	PcyM_1444600	PCYB_144990	BRO1 domain-containing protein, putative	TRUE
PVP01_0004640	PIR protein, pseudogene	NA	NA	NA	NA	NA	NA	NA	FALSE
PVP01_1214800	secreted ookinete protein, putative	OG0004473	5	PBANKA_1353400	PF3D7_1340000	PcyM_1216900	PCYB_122320	secreted ookinete protein, putative	FALSE
PVP01_0413700	ubiquinol-cytochrome-c reductase complex assembly factor 1, putative	OG0000863	5	PBANKA_0308100	PF3D7_0211300	PcyM_0411800	PCYB_041880	ubiquinol-cytochrome-c reductase complex assembly factor 1, putative	FALSE
PVP01_1266600	zinc finger protein, putative	OG0002535	5	PBANKA_1304300	PF3D7_1440400	PcyM_1275500	PCYB_127470	zinc finger protein, putative	FALSE
PVP01_0812000	heme oxygenase, putative	OG0004183	5	PBANKA_1210300	PF3D7_1011900	PcyM_0812200	PCYB_082170	heme oxygenase	FALSE
PVP01_0408800	Alba domain-containing protein, putative	OG0003353	5	PBANKA_0312900	PF3D7_0216200	PcyM_0406100	PCYB_041410	Alba domain-containing protein, putative	FALSE
PVP01_1201600	Plasmodium exported protein, unknown function	OG0005111	3	NA	NA	PcyM_1202800	PCYB_121050	NA	FALSE
PVP01_1460900	WD repeat-containing protein 82, putative	OG0003184	5	PBANKA_1457100	PF3D7_1243800	PcyM_1467100	PCYB_146840	WD repeat-containing protein 82, putative	FALSE
PVP01_1266400	protein SOC3, putative	OG0004306	5	PBANKA_1304500	PF3D7_1440600	PcyM_1275300	PCYB_127450	protein SOC3, putative	FALSE
PVP01_1258800	condensin-2 complex subunit G2, putative	NA	NA	NA	NA	NA	NA	NA	TRUE
PVP01_MIT02700	cytochrome oxidase subunit 3	OG0000650	4	PBANKA_MIT01100	PF3D7_MIT01400	PcyM_MT00600	NA	cytochrome c oxidase subunit 3	TRUE
PVP01_0734400	Plasmodium exported protein, unknown function	OG0005091	4	NA	PF3D7_0935700	PcyM_0737800	PCYB_074290	Plasmodium exported protein, unknown function	FALSE
PVP01_0008370	PIR protein	NA	NA	NA	NA	NA	NA	NA	FALSE
PVP01_0722600	conserved Plasmodium protein, unknown function	OG0003708	5	PBANKA_0825000	PF3D7_0924100	PcyM_0723200	PCYB_073170	conserved Plasmodium protein, unknown function	FALSE
PVP01_0201100	tryptophan-rich protein	OG0005297	3	NA	NA	PcyM_0202300	PCYB_021080	NA	FALSE
PVP01_0008230	PIR protein	NA	NA	NA	NA	NA	NA	NA	FALSE
PVP01_1014800	50S ribosomal protein L14, mitochondrial, putative	OG0002448	5	PBANKA_1233900	PF3D7_0519100	PcyM_1012900	PCYB_102270	50S ribosomal protein L14, mitochondrial, putative	TRUE
PVP01_0008700	PIR protein	NA	NA	NA	NA	NA	NA	NA	FALSE
PVP01_0726000	dynein light chain, putative	OG0001531	5	PBANKA_0828300	PF3D7_0927500	PcyM_0727500	PCYB_073510	dynein light chain, putative	FALSE
PVP01_0505800	folate transporter 1, putative	OG0001265	5	PBANKA_0702100	PF3D7_0828600	PcyM_0504600	PCYB_051270	folate transporter 1	FALSE
PVP01_0003040	PIR protein	NA	NA	NA	NA	NA	NA	NA	FALSE
PVP01_0006510	PIR protein	NA	NA	NA	NA	NA	NA	NA	FALSE
PVP01_0001060	PIR protein	NA	NA	NA	NA	NA	NA	NA	FALSE
PVP01_0612100	conserved Plasmodium protein, unknown function	OG0003449	5	PBANKA_0511100	PF3D7_1027000	PcyM_0615300	PCYB_062110	conserved Plasmodium protein, unknown function	FALSE
PVP01_0405600	ribosome associated membrane protein RAMP4, putative	OG0000903	5	PBANKA_0315800	PF3D7_0219400	PcyM_0402650	PCYB_041120	ribosome associated membrane protein RAMP4, putative	TRUE
PVP01_0737500	Plasmodium exported protein, unknown function	NA	NA	NA	NA	NA	NA	NA	FALSE
PVP01_0119000	5.8S ribosomal RNA	NA	NA	NA	NA	NA	NA	NA	FALSE
PVP01_0711200	tRNA (adenine(58)-N(1))-methyltransferase non- catalytic subunit TRM6, putative	OG0001451	5	PBANKA_0813800	PF3D7_0912800	PcyM_0711000	PCYB_072050	tRNA (adenine(58)-N(1))-methyltransferase non-catalytic subunit TRM6, putative	FALSE
PVP01_1320400	protein archease, putative	OG0001885	5	PBANKA_1015700	PF3D7_1429000	PcyM_1323500	PCYB_132970	protein archease, putative	FALSE
PVP01_0916700	serine esterase, putative	OG0000472	5	PBANKA_0931900	PF3D7_1116100	PcyM_0918600	PCYB_092220	serine esterase, putative	FALSE
PVP01_0615500	conserved protein, unknown function	OG0001078	5	PBANKA_0514400	PF3D7_1030400	PcyM_0619100	PCYB_062460	conserved protein, unknown function	FALSE
PVP01_0108800	heat shock protein 86 family protein, putative	OG0002356	5	PBANKA_1219000	PF3D7_0708500	PcyM_0109600	PCYB_011560	heat shock protein 86 family protein	FALSE
PVP01_1317300	conserved Plasmodium protein, unknown function	NA	NA	NA	NA	NA	NA	NA	TRUE
PVP01_0707800	apoptosis-related protein, putative	OG0003660	5	PBANKA_0810500	PF3D7_0909300	PcyM_0707500	PCYB_071710	apoptosis-related protein	TRUE
PVP01_0000460	PIR protein	NA	NA	NA	NA	NA	NA	NA	FALSE
PVP01_1302500	signal recognition particle subunit SRP14, putative	OG0001139	5	PBANKA_0602200	PF3D7_1203200	PcyM_1303000	PCYB_131200	signal recognition particle subunit SRP14	FALSE
PVP01_0006100	PIR protein	NA	NA	NA	NA	NA	NA	NA	FALSE
PVP01_1223400	conserved Plasmodium protein, unknown function	OG0004451	5	PBANKA_1346100	PF3D7_1331200	PcyM_1226300	PCYB_123140	conserved Plasmodium protein, unknown function	TRUE
PVP01_0421900	conserved Plasmodium protein, unknown function	OG0000827	5	PBANKA_0301100	PF3D7_0203200	PcyM_0421800	PCYB_042690	conserved Plasmodium protein, unknown function	FALSE
PVP01_1427700	RNA-binding protein, putative	OG0003007	5	PBANKA_1425000	PF3D7_0812500	PcyM_1428900	PCYB_143570	RNA-binding protein, putative	FALSE
PVP01_1220300	MSP7-like protein	NA	NA	NA	NA	NA	NA	NA	TRUE
PVP01_1112200	conserved Plasmodium protein, unknown function	OG0004124	5	PBANKA_1135900	PF3D7_1359700	PcyM_1111900	PCYB_112090	conserved Plasmodium protein, unknown function	FALSE
PVP01_0106400	conserved protein, unknown function	OG0001395	5	PBANKA_0803800	PF3D7_0706200	PcyM_0107100	PCYB_011360	conserved protein, unknown function	FALSE
PVP01_0000340	PIR protein, pseudogene	NA	NA	NA	NA	NA	NA	NA	FALSE
PVP01_0011060	PIR protein	NA	NA	NA	NA	NA	NA	NA	FALSE
PVP01_1422100	conserved Plasmodium protein, unknown function	OG0004572	5	PBANKA_1419600	PF3D7_1321300	PcyM_1423100	PCYB_143040	conserved Plasmodium membrane protein, unknown function	TRUE
PVP01_1245200	splicing factor 3B subunit 2, putative	OG0002652	5	PBANKA_1325300	PF3D7_1461600	PcyM_1251300	PCYB_125340	splicing factor 3B subunit 2, putative	TRUE
PVP01_0210500	StAR-related lipid transfer protein, putative	OG0003292	5	PBANKA_0208900	PF3D7_0104200	PcyM_0213700	PCYB_021970	StAR-related lipid transfer protein	TRUE
PVP01_1001850	PIR protein, pseudogene	NA	NA	NA	NA	NA	NA	NA	FALSE
PVP01_1403500	deoxyhypusine hydroxylase	OG0002860	5	PBANKA_1401100	PF3D7_1302600	PcyM_1404000	PCYB_141210	deoxyhypusine hydroxylase	TRUE
PVP01_1336900	p1/s1 nuclease, putative	NA	NA	NA	NA	NA	NA	NA	FALSE
PVP01_1001100	PIR protein	NA	NA	NA	NA	NA	NA	NA	FALSE
PVP01_MIT02300	ribosomal RNA fragment	NA	NA	NA	NA	NA	NA	NA	FALSE
PVP01_1420400	conserved protein, unknown function	OG0002961	5	PBANKA_1418000	PF3D7_1319500	PcyM_1421400	PCYB_142870	conserved protein, unknown function	TRUE
PVP01_0311800	RNA-binding protein, putative	OG0001200	5	PBANKA_0613700	PF3D7_0716000	PcyM_0315200	PCYB_031980	RNA-binding protein, putative	TRUE
PVP01_0415300	conserved Plasmodium protein, unknown function	OG0003330	5	PBANKA_0306600	PF3D7_0209500	PcyM_0413600	PCYB_042040	conserved Plasmodium protein, unknown function	FALSE
PVP01_0010120	PIR protein	NA	NA	NA	NA	NA	NA	NA	FALSE
PVP01_API04300	DNA-directed RNA polymerase subunit beta, putative	OG0004718	4	PBANKA_API00150	PF3D7_API04400	PcyM_API00400	NA	DNA-directed RNA polymerase subunit beta, putative	FALSE
PVP01_1028100	mediator of RNA polymerase II transcription subunit 11, putative	OG0004027	5	PBANKA_1105500	PF3D7_0505900	PcyM_1028100	PCYB_103570	mediator of RNA polymerase II transcription subunit 11, putative	FALSE
PVP01_0420300	3'-5' exonuclease, putative	OG0003317	5	PBANKA_0302600	PF3D7_0204800	PcyM_0420000	PCYB_042540	3'-5' exonuclease, putative	FALSE
PVP01_1265900	KS1 protein precursor, putative	OG0004310	5	PBANKA_1305000	PF3D7_1441100	PcyM_1274800	PCYB_127400	conserved Plasmodium protein, unknown function	TRUE
PVP01_API01500	apicoplast ribosomal protein S19, putative	OG0004847	4	PBANKA_API00400	PF3D7_API01600	PcyM_API03200	NA	apicoplast ribosomal protein S19	FALSE
PVP01_0919600	acyl-CoA-binding protein, putative	OG0001720	5	PBANKA_0929100	PF3D7_1119000	PcyM_0921600	PCYB_092510	acyl-CoA-binding protein, putative	FALSE
PVP01_0947000	conserved Plasmodium protein, unknown function	OG0005332	3	NA	NA	PcyM_0951400	PCYB_095180	NA	FALSE
PVP01_1012200	ATP-dependent RNA helicase DDX1, putative	OG0000549	5	PBANKA_1236300	PF3D7_0521700	PcyM_1010100	PCYB_102000	ATP-dependent RNA helicase DDX1, putative	FALSE
PVP01_0204600	bromodomain protein 3, putative	OG0000757	5	PBANKA_0203200	PF3D7_0110500	PcyM_0206300	PCYB_021390	bromodomain protein 3, putative	TRUE
PVP01_1118100	ER lumen protein retaining receptor, putative	OG0002165	5	PBANKA_1130200	PF3D7_1353600	PcyM_1118400	PCYB_112660	ER lumen protein retaining receptor	TRUE
PVP01_1100900	PIR protein	NA	NA	NA	NA	NA	NA	NA	FALSE
PVP01_0803200	conserved Plasmodium protein, unknown function	OG0002259	5	PBANKA_1201800	PF3D7_1003400	PcyM_0802800	PCYB_081280	conserved Plasmodium protein, unknown function	TRUE
PVP01_0121800	PIR protein	NA	NA	NA	NA	NA	NA	NA	FALSE
PVP01_0600700	PIR protein	NA	NA	NA	NA	NA	NA	NA	FALSE
PVP01_1410900	conserved Plasmodium protein, unknown function	OG0004543	5	PBANKA_1408400	PF3D7_1309900	PcyM_1411500	PCYB_141940	conserved Plasmodium protein, unknown function	FALSE
PVP01_1135500	conserved Plasmodium protein, unknown function	OG0003277	5	PBANKA_0111900	PF3D7_0613600	PcyM_1137400	PCYB_114350	conserved Plasmodium protein, unknown function	FALSE
PVP01_1347000	choline kinase, putative	OG0000502	5	PBANKA_1040100	PF3D7_1401800	PcyM_1354300	PCYB_135450	choline kinase	TRUE
PVP01_1463100	delta-aminolevulinic acid synthetase, putative	OG0003198	5	PBANKA_1459200	PF3D7_1246100	PcyM_1469400	PCYB_147050	delta-aminolevulinic acid synthetase	FALSE
PVP01_0101100	PIR protein	NA	NA	NA	NA	NA	NA	NA	FALSE
PVP01_0942100	phosphatidylinositol N-acetylglucosaminyltransferase subunit H, putative	OG0003772	5	PBANKA_0907600	PF3D7_1141400	PcyM_0946100	PCYB_094690	phosphatidylinositol N-acetylglucosaminyltransferase subunit H, putative	FALSE
PVP01_1036100	PIR protein	NA	NA	NA	NA	NA	NA	NA	FALSE
PVP01_0943600	conserved Plasmodium protein, unknown function	OG0003766	5	PBANKA_0906100	PF3D7_1142900	PcyM_0947700	PCYB_094850	conserved Plasmodium protein, unknown function	TRUE
PVP01_1103300	mitochondrial carrier protein, putative	OG0002248	5	PBANKA_1144600	PF3D7_1368700	PcyM_1102500	PCYB_111180	mitochondrial carrier protein, putative	FALSE
PVP01_0119900	PIR protein	NA	NA	NA	NA	NA	NA	NA	FALSE
PVP01_1148900	PIR protein	NA	NA	NA	NA	NA	NA	NA	FALSE
PVP01_0511800	dynein light chain 1, putative	OG0001304	5	PBANKA_0708100	PF3D7_0822500	PcyM_0511200	PCYB_051870	dynein light chain 1	TRUE
PVP01_1269200	DNA repair metallo-beta-lactamase protein, putative	OG0000556	5	PBANKA_1301900	PF3D7_1474300	PcyM_1278300	PCYB_127710	DNA repair metallo-beta-lactamase protein, putative	FALSE
PVP01_0100100	PIR protein	NA	NA	NA	NA	NA	NA	NA	FALSE
PVP01_0001440	Plasmodium exported protein (PHIST), unknown function	OG0005134	3	NA	NA	PcyM_1259000	PCYB_002860	NA	FALSE
PVP01_0005670	PIR protein	NA	NA	NA	NA	NA	NA	NA	FALSE
PVP01_0214000	conserved protein, unknown function	OG0000810	5	PBANKA_0212400	PF3D7_0728300	PcyM_0217500	PCYB_022320	conserved protein, unknown function	FALSE
PVP01_0003900	PIR protein	NA	NA	NA	NA	NA	NA	NA	FALSE
PVP01_0005570	PIR protein	NA	NA	NA	NA	NA	NA	NA	FALSE
PVP01_1465000	U3 small nucleolar RNA-associated protein 11, putative	OG0004700	5	PBANKA_1460800	PF3D7_1247900	PcyM_1471500	PCYB_147230	U3 small nucleolar RNA-associated protein 11, putative	FALSE
PVP01_1257100	conserved protein, unknown function	OG0002585	5	PBANKA_1313600	PF3D7_1449900	PcyM_1265400	PCYB_126520	conserved protein, unknown function	FALSE
PVP01_1400900	Plasmodium exported protein, unknown function	NA	NA	NA	NA	NA	NA	NA	FALSE
PVP01_0606600	endomembrane protein 70, putative	OG0000391	5	PBANKA_0505600	PF3D7_1021400	PcyM_0608400	PCYB_061570	endomembrane protein 70, putative	FALSE
PVP01_0007130	PIR protein	NA	NA	NA	NA	NA	NA	NA	FALSE
PVP01_0002330	PIR protein	NA	NA	NA	NA	NA	NA	NA	FALSE
PVP01_0007080	PIR protein	NA	NA	NA	NA	NA	NA	NA	FALSE
PVP01_1002400	G-patch domain-containing protein, putative	OG0004291	5	PBANKA_1245800	PF3D7_0531400	PcyM_1000100	PCYB_101050	G-patch domain-containing protein, putative	TRUE
PVP01_1142300	conserved Plasmodium protein, unknown function	OG0000703	5	PBANKA_0105300	PF3D7_0606600	PcyM_1145500	PCYB_114980	conserved Plasmodium protein, unknown function	FALSE
PVP01_0739100	Plasmodium exported protein, unknown function	NA	NA	NA	NA	NA	NA	NA	FALSE
PVP01_1262300	shikimate dehydrogenase, putative	OG0004324	5	PBANKA_1308500	PF3D7_1444700	PcyM_1271100	PCYB_127040	shikimate dehydrogenase, putative	FALSE
PVP01_1130900	rhomboid protease ROM10, putative	OG0004068	5	PBANKA_1117800	PF3D7_0618600	PcyM_1132100	PCYB_113890	rhomboid protease ROM10	FALSE
PVP01_0834900	transporter, putative	OG0000927	5	PBANKA_0403800	PF3D7_0305300	PcyM_0838900	PCYB_084390	transporter, putative	TRUE
PVP01_1424500	secreted ookinete protein, putative	OG0002983	5	PBANKA_1421700	PF3D7_0715400	PcyM_1425600	PCYB_143240	secreted ookinete protein, putative	FALSE
PVP01_1118500	tetratricopeptide repeat protein, putative	NA	NA	NA	NA	NA	NA	NA	FALSE
PVP01_0003930	PIR protein	NA	NA	NA	NA	NA	NA	NA	FALSE
PVP01_0010100	PIR protein	NA	NA	NA	NA	NA	NA	NA	FALSE
PVP01_0721700	nitric oxide synthase, putative	OG0001508	5	PBANKA_0824100	PF3D7_0923200	PcyM_0722000	PCYB_073080	nitric oxide synthase, putative	FALSE
PVP01_0614800	conserved Plasmodium protein, unknown function	OG0003457	5	PBANKA_0513700	PF3D7_1029700	PcyM_0618400	PCYB_062390	conserved Plasmodium protein, unknown function	TRUE
PVP01_0006870	PIR protein	NA	NA	NA	NA	NA	NA	NA	FALSE
PVP01_1254100	conserved protein, unknown function	OG0002605	5	PBANKA_1316600	PF3D7_1452900	PcyM_1262300	PCYB_126225	conserved protein, unknown function	FALSE
PVP01_0823200	E3 ubiquitin-protein ligase, putative	OG0001419	5	PBANKA_0808300	PF3D7_0316900	PcyM_0825000	PCYB_083280	E3 ubiquitin-protein ligase, putative	TRUE
PVP01_0828400	ATP synthase F0 subunit d-like protein, putative	OG0000967	5	PBANKA_0409800	PF3D7_0311800	PcyM_0831000	PCYB_083770	ATP synthase F0 subunit d-like protein, putative	FALSE
PVP01_1322900	MORN repeat protein, putative	OG0003945	4	PBANKA_1018200	PF3D7_1426400	PcyM_1326700	NA	MORN repeat protein, putative	FALSE
PVP01_0007240	PIR protein	NA	NA	NA	NA	NA	NA	NA	FALSE
PVP01_1406000	protein AMR3, putative	OG0004524	5	PBANKA_1403600	PF3D7_1305100	PcyM_1406600	PCYB_141460	protein AMR3	FALSE
PVP01_0003540	PIR protein	NA	NA	NA	NA	NA	NA	NA	FALSE
PVP01_1238500	leucine-rich repeat protein	OG0000576	5	PBANKA_1331600	PF3D7_1468300	PcyM_1243900	PCYB_124670	leucine-rich repeat protein	FALSE
PVP01_0703600	mitochondrial carrier protein, putative	OG0000387	5	PBANKA_0416200	PF3D7_0905200	PcyM_0702900	PCYB_071300	mitochondrial carrier protein, putative	FALSE
PVP01_1209100	isocitrate dehydrogenase [NADP], mitochondrial, putative	OG0000596	5	PBANKA_1358600	PF3D7_1345700	PcyM_1210700	PCYB_121800	isocitrate dehydrogenase [NADP], mitochondrial	FALSE
PVP01_0930700	60S ribosomal protein L38, putative	OG0001646	5	PBANKA_0918100	PF3D7_1130100	PcyM_0934600	PCYB_093620	60S ribosomal protein L38	FALSE
PVP01_0009110	PIR protein	NA	NA	NA	NA	NA	NA	NA	FALSE
PVP01_1408400	conserved Plasmodium protein, unknown function	OG0004533	5	PBANKA_1406000	PF3D7_1307500	PcyM_1409000	PCYB_141700	conserved Plasmodium protein, unknown function	FALSE
PVP01_1307200	conserved Plasmodium protein, unknown function	OG0001163	5	PBANKA_0606600	PF3D7_1208100	PcyM_1308700	PCYB_131670	conserved Plasmodium protein, unknown function	FALSE
PVP01_1220200	MSP7-like protein	NA	NA	NA	NA	NA	NA	NA	FALSE
PVP01_1438700	cell cycle associated protein, putative	OG0003065	5	PBANKA_1435500	PF3D7_1220300	PcyM_1440400	PCYB_144610	cell cycle associated protein, putative	FALSE
PVP01_0604200	eukaryotic translation initiation factor subunit eIF2A, putative	OG0001019	5	PBANKA_0503200	PF3D7_1019000	PcyM_0604400	PCYB_061330	eukaryotic translation initiation factor subunit eIF2A, putative	FALSE
PVP01_1201100	PIR protein, pseudogene	NA	NA	NA	NA	NA	NA	NA	FALSE
PVP01_0700800	tryptophan-rich protein	NA	NA	NA	NA	NA	NA	NA	FALSE
PVP01_0006580	PIR protein	NA	NA	NA	NA	NA	NA	NA	FALSE
PVP01_0007210	Plasmodium exported protein, unknown function	NA	NA	NA	NA	NA	NA	NA	FALSE
PVP01_0219800	PIR protein	NA	NA	NA	NA	NA	NA	NA	FALSE
PVP01_0915200	conserved Plasmodium protein, unknown function	OG0003849	5	PBANKA_0933200	PF3D7_1114500	PcyM_0916800	PCYB_092070	conserved Plasmodium protein, unknown function	FALSE
PVP01_0208900	3'-5' exonuclease, putative	OG0000784	5	PBANKA_0207400	PF3D7_0105900	PcyM_0211700	PCYB_021810	3'-5' exonuclease, putative	FALSE
PVP01_0003240	PIR protein	NA	NA	NA	NA	NA	NA	NA	FALSE
PVP01_0007450	PIR protein	NA	NA	NA	NA	NA	NA	NA	FALSE
PVP01_1340600	FANCJ-like helicase, putative	OG0000500	5	PBANKA_1034100	PF3D7_1408400	PcyM_1347900	PCYB_134830	FANCJ-like helicase, putative	FALSE
PVP01_1003000	CPW-WPC family protein	OG0002509	5	PBANKA_1245200	PF3D7_0530800	PcyM_1000700	PCYB_101110	CPW-WPC family protein	FALSE
PVP01_1227600	syntaxin, Qa-SNARE family, putative	OG0004432	5	PBANKA_1342000	PF3D7_1326800	PcyM_1231500	PCYB_123580	syntaxin, Qa-SNARE family	FALSE
PVP01_1004600	apicoplast TIC22 protein, putative	OG0002501	5	PBANKA_1243800	PF3D7_0529300	PcyM_1002300	PCYB_101250	apicoplast TIC22 protein	FALSE
PVP01_0727500	transcription initiation factor TFIID subunit 7, putative	OG0000444	5	PBANKA_0829800	PF3D7_0929000	PcyM_0729100	PCYB_073640	transcription initiation factor TFIID subunit 7, putative	TRUE
PVP01_0910400	small nucleolar RNA SNORD127	NA	NA	NA	NA	NA	NA	NA	FALSE
PVP01_1125100	conserved protein, unknown function	OG0002129	5	PBANKA_1123300	PF3D7_0624400	PcyM_1125800	PCYB_113340	conserved protein, unknown function	FALSE
PVP01_0909800	small nucleolar RNA snoR07	NA	NA	NA	NA	NA	NA	NA	FALSE
PVP01_1339000	cytidine diphosphate-diacylglycerol synthase, putative	OG0001965	5	PBANKA_1032600	PF3D7_1409900	PcyM_1346100	PCYB_134680	cytidine diphosphate-diacylglycerol synthase	TRUE
PVP01_1433500	conserved protein, unknown function	OG0003038	5	PBANKA_1430500	PF3D7_1214700	PcyM_1435000	PCYB_144120	conserved protein, unknown function	TRUE
PVP01_1268200	OST-HTH associated domain protein, putative	OG0004300	5	PBANKA_1302700	PF3D7_1438800	PcyM_1277300	PCYB_127630	OST-HTH associated domain protein, putative	FALSE
PVP01_0507200	conserved Plasmodium protein, unknown function	OG0005312	3	NA	NA	PcyM_0506200	PCYB_051410	NA	FALSE
PVP01_1023000	translationally-controlled tumor protein homolog, putative	OG0002057	5	PBANKA_1110500	PF3D7_0511000	PcyM_1022100	PCYB_103070	translationally-controlled tumor protein homolog	TRUE
PVP01_0315300	60S ribosomal protein L11a, putative	OG0001221	5	PBANKA_0617100	PF3D7_0719600	PcyM_0320050	PCYB_032370	60S ribosomal protein L11a, putative	FALSE
PVP01_0010410	PIR protein	NA	NA	NA	NA	NA	NA	NA	FALSE
PVP01_1422600	conserved Plasmodium protein, unknown function	OG0004574	5	PBANKA_1420100	PF3D7_0713500	PcyM_1423600	PCYB_143090	conserved Plasmodium protein, unknown function	FALSE
PVP01_0518400	adenylate kinase 2, putative	OG0003588	5	PBANKA_0713900	PF3D7_0816900	PcyM_0519100	PCYB_052490	adenylate kinase 2	FALSE
PVP01_1245600	U3 small nucleolar ribonucleoprotein protein IMP3, putative	OG0002649	5	PBANKA_1324900	PF3D7_1461200	PcyM_1251900	PCYB_125380	U3 small nucleolar ribonucleoprotein protein IMP3, putative	FALSE
PVP01_1437300	dynamin-like protein, putative	OG0003058	5	PBANKA_1434100	PF3D7_1218500	PcyM_1438900	PCYB_144480	dynamin-like protein, putative	TRUE
PVP01_0004690	PIR protein	NA	NA	NA	NA	NA	NA	NA	FALSE
PVP01_0616800	protein phosphatase inhibitor 3, putative	OG0001085	5	PBANKA_0515500	PF3D7_1031700	PcyM_0620800	PCYB_062600	protein phosphatase inhibitor 3	TRUE
PVP01_0601000	Plasmodium exported protein, unknown function	OG0005518	3	NA	NA	PcyM_0601100	PCYB_061030	NA	FALSE
PVP01_0700300	Plasmodium exported protein, unknown function	NA	NA	NA	NA	NA	NA	NA	FALSE
PVP01_0934200	apical membrane antigen 1	OG0001631	5	PBANKA_0915000	PF3D7_1133400	PcyM_0938200	PCYB_093930	apical membrane antigen 1	TRUE
PVP01_0706700	conserved Plasmodium protein, unknown function	OG0003657	5	PBANKA_0809600	PF3D7_0908200	PcyM_0706200	PCYB_071600	conserved Plasmodium protein, unknown function	FALSE
PVP01_0003570	PIR protein	NA	NA	NA	NA	NA	NA	NA	FALSE
PVP01_0006850	PIR protein	NA	NA	NA	NA	NA	NA	NA	FALSE
PVP01_0404500	hypothetical protein	NA	NA	NA	NA	NA	NA	NA	FALSE
PVP01_1201400	Plasmodium exported protein (PHIST), unknown function	NA	NA	NA	NA	NA	NA	NA	FALSE
PVP01_0009180	PIR protein	NA	NA	NA	NA	NA	NA	NA	FALSE
PVP01_1234200	protein disulfide-isomerase, putative	OG0004410	5	PBANKA_1335800	PF3D7_1472600	PcyM_1239300	PCYB_124240	protein disulfide-isomerase	FALSE
PVP01_1401100	Plasmodium exported protein, unknown function	NA	NA	NA	NA	NA	NA	NA	FALSE
PVP01_1010800	mitochondrial-processing peptidase subunit alpha, putative	OG0002470	5	PBANKA_1237900	PF3D7_0523100	PcyM_1008700	PCYB_101860	mitochondrial-processing peptidase subunit alpha, putative	FALSE
PVP01_0901600	hypothetical protein	NA	NA	NA	NA	NA	NA	NA	FALSE
PVP01_1430300	acyl-CoA binding protein, putative	NA	NA	NA	NA	NA	NA	NA	FALSE
PVP01_0001600	PIR protein	NA	NA	NA	NA	NA	NA	NA	FALSE
PVP01_0400300	PIR protein	NA	NA	NA	NA	NA	NA	NA	FALSE
PVP01_0000680	PIR protein	NA	NA	NA	NA	NA	NA	NA	FALSE
PVP01_0708000	subpellicular microtubule protein 1, putative	OG0001431	5	PBANKA_0810700	PF3D7_0909500	PcyM_0707700	PCYB_071730	subpellicular microtubule protein 1, putative	FALSE
PVP01_1018300	gamete egress protein GEP, putative	OG0002082	5	PBANKA_1115200	PF3D7_0515600	PcyM_1016900	PCYB_102610	gamete egress protein GEP, putative	TRUE
PVP01_1025500	guanidine nucleotide exchange factor, putative	OG0000306	5	PBANKA_1108100	PF3D7_0508500	PcyM_1025200	PCYB_103310	guanidine nucleotide exchange factor	FALSE
PVP01_0723400	alpha-tubulin N-acetyltransferase, putative	OG0004911	4	NA	PF3D7_0924900	PcyM_0724100	PCYB_073250	alpha-tubulin N-acetyltransferase, putative	FALSE
PVP01_1421400	ras-related protein Rab-11A, putative	OG0002968	5	PBANKA_1418900	PF3D7_1320600	PcyM_1422400	PCYB_142970	ras-related protein Rab-11A	TRUE
PVP01_0010740	PIR protein	NA	NA	NA	NA	NA	NA	NA	FALSE
PVP01_API00400	tRNA Cysteine	NA	NA	NA	NA	NA	NA	NA	FALSE
PVP01_0007560	PIR protein	NA	NA	NA	NA	NA	NA	NA	FALSE
PVP01_1400400	PIR protein	NA	NA	NA	NA	NA	NA	NA	FALSE
PVP01_0508000	SPRY domain, putative	OG0001279	5	PBANKA_0704300	PF3D7_0826300	PcyM_0507100	PCYB_051490	SPRY domain, putative	TRUE
PVP01_0529700	holo-[acyl-carrier-protein] synthase, putative	OG0001118	5	PBANKA_0521600	PF3D7_0420200	PcyM_0530400	PCYB_053460	holo-[acyl-carrier-protein] synthase, putative	FALSE
PVP01_0001980	PIR protein	NA	NA	NA	NA	NA	NA	NA	FALSE
PVP01_0009540	PIR protein	NA	NA	NA	NA	NA	NA	NA	FALSE
PVP01_1114400	DNA helicase, putative	OG0000521	5	PBANKA_1133800	PF3D7_1357500	PcyM_1114100	PCYB_112310	DNA helicase, putative	FALSE
PVP01_0010980	PIR protein	NA	NA	NA	NA	NA	NA	NA	FALSE
PVP01_0705500	conserved Plasmodium protein, unknown function	OG0003653	5	PBANKA_0808500	PF3D7_0907000	PcyM_0704900	PCYB_071480	conserved Plasmodium protein, unknown function	TRUE
PVP01_0534700	PIR protein	NA	NA	NA	NA	NA	NA	NA	FALSE
PVP01_0211200	conserved Plasmodium protein, unknown function	OG0003296	5	PBANKA_0209600	PF3D7_0103500	PcyM_0214400	PCYB_022040	conserved Plasmodium protein, unknown function	FALSE
PVP01_1203900	AP2 domain transcription factor AP2-O4, putative	OG0000601	5	PBANKA_1363700	PF3D7_1350900	PcyM_1205300	PCYB_121280	AP2 domain transcription factor AP2-O4, putative	TRUE
PVP01_1246600	conserved protein, unknown function	OG0002641	5	PBANKA_1323900	PF3D7_1460200	PcyM_1253100	PCYB_125480	conserved protein, unknown function	FALSE
PVP01_0503600	tryptophan-rich protein	NA	NA	NA	NA	NA	NA	NA	FALSE
PVP01_1413100	GYF domain-containing protein, putative	OG0002912	5	PBANKA_1410600	PF3D7_1312100	PcyM_1413800	PCYB_142160	GYF domain-containing protein, putative	FALSE
PVP01_0110400	conserved Plasmodium protein, unknown function	OG0004813	5	PBANKA_1220600	PF3D7_0710000	PcyM_0111400	PCYB_011720	conserved Plasmodium protein, unknown function	TRUE
PVP01_1217100	tRNA Serine	NA	NA	NA	NA	NA	NA	NA	FALSE
PVP01_0010470	PIR protein	NA	NA	NA	NA	NA	NA	NA	FALSE
PVP01_1205600	glutamate--tRNA ligase, putative	OG0002838	5	PBANKA_1362000	PF3D7_1349200	PcyM_1207000	PCYB_121450	glutamate--tRNA ligase, putative	FALSE
PVP01_1329000	YTH domain-containing protein 1, putative	OG0001919	5	PBANKA_1023300	PF3D7_1419900	PcyM_1334300	PCYB_133730	YTH domain-containing protein 1, putative	FALSE
PVP01_0806900	rho GTPase-activating protein, putative	OG0002283	5	PBANKA_1205400	PF3D7_1007200	PcyM_0806700	PCYB_081650	rho GTPase-activating protein, putative	TRUE
PVP01_0524700	Plasmodium exported protein (PHIST), unknown function	NA	NA	NA	NA	NA	NA	NA	FALSE
PVP01_0009550	Plasmodium exported protein, unknown function	NA	NA	NA	NA	NA	NA	NA	FALSE
PVP01_1225000	conserved protein, unknown function	OG0004443	5	PBANKA_1344500	PF3D7_1329500	PcyM_1228100	PCYB_123300	conserved protein, unknown function	FALSE
PVP01_0523100	Plasmodium exported protein (PHIST), unknown function	NA	NA	NA	NA	NA	NA	NA	FALSE
PVP01_0805800	CCR4-NOT transcription complex subunit 5, putative	OG0002274	5	PBANKA_1204300	PF3D7_1006100	PcyM_0805550	PCYB_081540	CCR4-NOT transcription complex subunit 5, putative	FALSE
PVP01_1312000	conserved Plasmodium protein, unknown function	OG0003521	5	PBANKA_0611300	PF3D7_1437500	PcyM_1313900	PCYB_132150	conserved Plasmodium membrane protein, unknown function	TRUE
PVP01_1412100	meiosis-specific nuclear structural protein 1, putative	OG0004549	5	PBANKA_1409600	PF3D7_1311100	PcyM_1412800	PCYB_142060	meiosis-specific nuclear structural protein 1, putative	FALSE
PVP01_0005560	PIR protein	NA	NA	NA	NA	NA	NA	NA	FALSE
PVP01_0004740	PIR protein	NA	NA	NA	NA	NA	NA	NA	FALSE
PVP01_0004360	PIR protein	NA	NA	NA	NA	NA	NA	NA	FALSE
PVP01_1255600	transcriptional regulatory protein sir2b, putative	OG0002595	5	PBANKA_1315100	PF3D7_1451400	PcyM_1263900	PCYB_126370	transcriptional regulatory protein sir2b	FALSE
PVP01_1120900	DNA methyltransferase 1-associated protein 1, putative	OG0002149	5	PBANKA_1127300	PF3D7_0628600	PcyM_1121500	PCYB_112940	DNA methyltransferase 1-associated protein 1, putative	FALSE
PVP01_0839000	PIR protein	NA	NA	NA	NA	NA	NA	NA	FALSE
PVP01_0319400	metallo-hydrolase/oxidoreductase, putative	OG0001248	5	PBANKA_0621200	PF3D7_0723700	PcyM_0324100	PCYB_032750	metallo-hydrolase/oxidoreductase, putative	FALSE
PVP01_0009460	PIR protein	NA	NA	NA	NA	NA	NA	NA	FALSE
PVP01_0007690	Plasmodium exported protein, unknown function, pseudogene	NA	NA	NA	NA	NA	NA	NA	FALSE
PVP01_1453300	vacuolar-type H pumping pyrophosphatase, putative	OG0004669	5	PBANKA_1449800	PF3D7_1235200	PcyM_1458500	PCYB_146090	V-type K -independent H -translocating inorganic pyrophosphatase	TRUE
PVP01_0603200	tRNA pseudouridine synthase, putative	OG0001015	5	PBANKA_0502300	PF3D7_1018000	PcyM_0603400	PCYB_061230	tRNA pseudouridine synthase, putative	TRUE
PVP01_0917900	conserved protein, unknown function	OG0003842	5	PBANKA_0930700	PF3D7_1117300	PcyM_0919900	PCYB_092340	conserved protein, unknown function	TRUE
PVP01_1123700	conserved Plasmodium protein, unknown function	OG0005222	4	NA	PF3D7_0625800	PcyM_1124400	PCYB_113220	conserved Plasmodium protein, unknown function	FALSE
PVP01_1340100	tRNA-dihydrouridine synthase, putative	OG0001971	5	PBANKA_1033600	PF3D7_1408900	PcyM_1347400	PCYB_134790	tRNA-dihydrouridine synthase, putative	FALSE
PVP01_1247900	ATP-dependent RNA helicase DBP5, putative	OG0002632	5	PBANKA_1322700	PF3D7_1459000	PcyM_1254400	PCYB_125610	ATP-dependent RNA helicase DBP5	TRUE
PVP01_0007230	PIR protein	NA	NA	NA	NA	NA	NA	NA	FALSE
PVP01_0006570	PIR protein	NA	NA	NA	NA	NA	NA	NA	FALSE
PVP01_0006090	PIR protein	NA	NA	NA	NA	NA	NA	NA	FALSE
PVP01_0928800	conserved Plasmodium protein, unknown function	NA	NA	NA	NA	NA	NA	NA	TRUE
PVP01_0823600	kinetochore protein NUF2, putative	OG0000986	5	PBANKA_0414300	PF3D7_0316500	PcyM_0825500	PCYB_083320	kinetochore protein NUF2, putative	FALSE
PVP01_1327100	copper transporter, putative	OG0003953	5	PBANKA_1021500	PF3D7_1421900	PcyM_1331900	PCYB_133540	copper transporter, putative	FALSE
PVP01_0506100	conserved protein, unknown function	OG0001268	5	PBANKA_0702400	PF3D7_0828300	PcyM_0504900	PCYB_051300	conserved protein, unknown function	TRUE
PVP01_1334500	serine/threonine protein phosphatase PP1, putative	OG0000497	5	PBANKA_1028300	PF3D7_1414400	PcyM_1340500	PCYB_134230	serine/threonine protein phosphatase PP1	TRUE
PVP01_0921500	heat shock factor-binding protein 1, putative	OG0003833	5	PBANKA_0927400	PF3D7_1120900	PcyM_0923900	PCYB_092690	heat shock factor-binding protein 1	FALSE
PVP01_0612800	centrin-3, putative	NA	NA	NA	NA	NA	NA	NA	FALSE
PVP01_1267500	oocyst rupture protein 2, putative	OG0004302	5	PBANKA_1303400	PF3D7_1439500	PcyM_1276600	PCYB_127560	oocyst rupture protein 2, putative	TRUE
PVP01_0523700	Plasmodium exported protein (PHIST), unknown function	OG0005514	3	NA	NA	PcyM_0525000	PCYB_052980	NA	FALSE
PVP01_1472100	PIR protein	NA	NA	NA	NA	NA	NA	NA	FALSE
PVP01_1327700	40S ribosomal protein S25, putative	OG0001912	5	PBANKA_1022000	PF3D7_1421200	PcyM_1332600	PCYB_133600	40S ribosomal protein S25	FALSE
PVP01_0706300	ribosomal protein L35, apicoplast, putative	OG0001424	5	PBANKA_0809200	PF3D7_0907800	PcyM_0705700	PCYB_071560	ribosomal protein L35, apicoplast, putative	TRUE
PVP01_1339600	conserved protein, unknown function	OG0001967	5	PBANKA_1033100	PF3D7_1409400	PcyM_1346900	PCYB_134740	conserved protein, unknown function	TRUE
PVP01_0002420	PIR protein	NA	NA	NA	NA	NA	NA	NA	FALSE
PVP01_1112700	high mobility group protein B4, putative	OG0002195	5	PBANKA_1135500	PF3D7_1359200	PcyM_1112400	PCYB_112140	high mobility group protein B4, putative	TRUE
PVP01_0829900	phosphoglycerate mutase, putative	OG0000958	5	PBANKA_0408400	PF3D7_0310300	PcyM_0833200	PCYB_083920	phosphoglycerate mutase, putative	FALSE
PVP01_0104500	conserved Plasmodium protein, unknown function	OG0003627	5	PBANKA_0802000	PF3D7_0704300	PcyM_0104600	PCYB_011170	conserved Plasmodium membrane protein, unknown function	FALSE
PVP01_1207800	WD repeat-containing protein 92, putative	OG0002831	5	PBANKA_1359900	PF3D7_1347000	PcyM_1209400	PCYB_121670	WD repeat-containing protein 92, putative	FALSE
PVP01_1206800	conserved Plasmodium protein, unknown function	OG0004500	5	PBANKA_1360800	PF3D7_1348000	PcyM_1208400	PCYB_121570	conserved Plasmodium protein, unknown function	FALSE
PVP01_0519400	dihydrolipoyl dehydrogenase, apicoplast, putative	OG0001342	5	PBANKA_0714900	PF3D7_0815900	PcyM_0520500	PCYB_052600	dihydrolipoyl dehydrogenase, apicoplast	FALSE
PVP01_0305800	NYN domain-containing protein, putative	OG0003895	5	PBANKA_1004100	PF3D7_0406500	PcyM_0308800	PCYB_031420	NYN domain-containing protein, putative	FALSE
PVP01_1418200	conserved Plasmodium protein, unknown function	OG0004560	5	PBANKA_1415800	PF3D7_1317300	PcyM_1419000	PCYB_142660	conserved Plasmodium protein, unknown function	TRUE
PVP01_1027200	transcription factor 25, putative	OG0002038	5	PBANKA_1106400	PF3D7_0506800	PcyM_1027200	PCYB_103480	transcription factor 25, putative	TRUE
PVP01_1007400	conserved Plasmodium protein, unknown function	OG0002486	5	PBANKA_1241200	PF3D7_0526400	PcyM_1005200	PCYB_101520	conserved Plasmodium protein, unknown function	FALSE
PVP01_0730600	adenylate kinase-like protein 2, putative	OG0000447	5	PBANKA_0832700	PF3D7_0931900	PcyM_0733100	PCYB_073940	adenylate kinase-like protein 2	FALSE
PVP01_0832500	conserved Plasmodium protein, unknown function	OG0003376	5	PBANKA_0406000	PF3D7_0307700	PcyM_0836500	PCYB_084160	conserved Plasmodium protein, unknown function	FALSE
PVP01_0723500	conserved Plasmodium protein, unknown function	OG0003711	5	PBANKA_0825800	PF3D7_0925000	PcyM_0724200	PCYB_073260	conserved Plasmodium protein, unknown function	TRUE
PVP01_0002110	PIR protein	NA	NA	NA	NA	NA	NA	NA	FALSE
PVP01_0731900	calcyclin-binding protein, putative	OG0001556	5	PBANKA_0834000	PF3D7_0933200	PcyM_0734800	PCYB_074070	calcyclin-binding protein, putative	FALSE
PVP01_1135700	50S ribosomal protein L18, apicoplast, putative	OG0000741	5	PBANKA_0111700	PF3D7_0613400	PcyM_1137600	PCYB_114370	50S ribosomal protein L18, apicoplast, putative	FALSE
PVP01_1019800	ATP-dependent DNA helicase UvrD, putative	OG0002076	5	PBANKA_1113800	PF3D7_0514100	PcyM_1018700	PCYB_102750	ATP-dependent DNA helicase UvrD	FALSE
PVP01_0726800	conserved Plasmodium protein, unknown function	NA	NA	NA	NA	NA	NA	NA	TRUE
PVP01_0004990	PIR protein	NA	NA	NA	NA	NA	NA	NA	FALSE
PVP01_0408500	conserved Plasmodium protein, unknown function	OG0003355	5	PBANKA_0313200	PF3D7_0216500	PcyM_0405700	PCYB_041380	conserved Plasmodium protein, unknown function	FALSE
PVP01_0947300	kinesin-X4, putative	OG0003754	5	PBANKA_0902400	PF3D7_1146700	PcyM_0951800	PCYB_095210	kinesin-X4, putative	FALSE
PVP01_0312700	drug/metabolite transporter DMT2, putative	OG0000292	5	PBANKA_0614600	PF3D7_0716900	PcyM_0316200	PCYB_032060	drug/metabolite transporter DMT2	FALSE
PVP01_0301000	Plasmodium exported protein, unknown function	NA	NA	NA	NA	NA	NA	NA	FALSE
PVP01_0716000	pre-mRNA-splicing factor ATP-dependent RNA helicase PRP43, putative	OG0000255	5	PBANKA_0818600	PF3D7_0917600	PcyM_0715900	PCYB_072520	pre-mRNA-splicing factor ATP-dependent RNA helicase PRP43, putative	FALSE
PVP01_0007710	Plasmodium exported protein, unknown function	NA	NA	NA	NA	NA	NA	NA	FALSE
PVP01_1254200	conserved Plasmodium protein, unknown function	OG0004342	5	PBANKA_1316500	PF3D7_1452800	PcyM_1262400	PCYB_126230	conserved Plasmodium protein, unknown function	FALSE
PVP01_1255300	calcineurin subunit B, putative	OG0002598	5	PBANKA_1315400	PF3D7_1451700	PcyM_1263600	PCYB_126340	calcineurin subunit B	TRUE
PVP01_1466600	protein CutA, putative	OG0003215	5	PBANKA_1462400	PF3D7_1249500	PcyM_1473500	PCYB_147390	protein CutA, putative	FALSE
PVP01_1230200	PRELI domain-containing protein, putative	OG0002732	5	PBANKA_1339600	PF3D7_1324400	PcyM_1234600	PCYB_123840	PRELI domain-containing protein, putative	FALSE
PVP01_0530400	conserved Plasmodium protein, unknown function	OG0003480	5	PBANKA_0522300	PF3D7_0421900	PcyM_0531400	PCYB_053530	conserved Plasmodium protein, unknown function	FALSE
PVP01_0407900	ATP synthase subunit alpha, mitochondrial, putative	OG0000890	5	PBANKA_0313800	PF3D7_0217100	PcyM_0405000	PCYB_041320	ATP synthase subunit alpha, mitochondrial	FALSE
PVP01_0000810	PIR protein	NA	NA	NA	NA	NA	NA	NA	FALSE
PVP01_1452800	upregulated in late gametocytes ULG8, putative	OG0004667	5	PBANKA_1449300	PF3D7_1234700	PcyM_1458000	PCYB_146040	upregulated in late gametocytes ULG8	FALSE
PVP01_1443100	splicing factor 3B subunit 6, putative	OG0003092	5	PBANKA_1439800	PF3D7_1224900	PcyM_1445400	PCYB_145060	splicing factor 3B subunit 6, putative	TRUE
PVP01_1441600	phospholipid-transporting ATPase, putative	OG0003081	5	PBANKA_1438300	PF3D7_1223400	PcyM_1443700	PCYB_144910	phospholipid-transporting ATPase, putative	TRUE
PVP01_1146300	SAC3 domain-containing protein, putative	OG0000677	5	PBANKA_0101400	PF3D7_0602600	PcyM_1149500	PCYB_115380	SAC3 domain-containing protein, putative	TRUE
PVP01_0101000	Plasmodium exported protein, unknown function	NA	NA	NA	NA	NA	NA	NA	FALSE
PVP01_0219600	PIR protein	NA	NA	NA	NA	NA	NA	NA	FALSE
PVP01_1443800	conserved Plasmodium protein, unknown function	OG0004637	5	PBANKA_1440500	PF3D7_1225600	PcyM_1446500	PCYB_145130	conserved Plasmodium protein, unknown function	FALSE
PVP01_0009960	PIR protein	NA	NA	NA	NA	NA	NA	NA	FALSE
PVP01_1253000	RNA-binding protein, putative	OG0002609	5	PBANKA_1317700	PF3D7_1454000	PcyM_1261100	PCYB_126130	RNA-binding protein, putative	FALSE
PVP01_1210800	aminomethyltransferase, putative	OG0002818	5	PBANKA_1357000	PF3D7_1344000	PcyM_1212500	PCYB_121970	aminomethyltransferase, putative	FALSE
PVP01_0512100	phosphorylated CTD interacting factor 1 WW domain-containing protein, putative	OG0001306	5	PBANKA_0708500	PF3D7_0822200	PcyM_0511600	PCYB_051900	phosphorylated CTD interacting factor 1 WW domain-containing protein, putative	FALSE
PVP01_0422000	protein kinase, putative	OG0004900	4	NA	PF3D7_0203100	PcyM_0421900	PCYB_042700	protein kinase, putative	TRUE
PVP01_1107700	pre-mRNA-splicing factor ATP-dependent RNA helicase PRP16, putative	OG0002220	5	PBANKA_1140200	PF3D7_1364300	PcyM_1107000	PCYB_111630	pre-mRNA-splicing factor ATP-dependent RNA helicase PRP16	TRUE
PVP01_0410000	rhoptry neck protein 6, putative	OG0000881	5	PBANKA_0311700	PF3D7_0214900	PcyM_0407400	PCYB_041530	rhoptry neck protein 6	TRUE
PVP01_0302500	conserved Plasmodium protein, unknown function	OG0003880	5	PBANKA_1000900	PF3D7_0403300	PcyM_0305000	PCYB_031090	conserved Plasmodium protein, unknown function	FALSE
PVP01_1336200	AAA family ATPase, putative	OG0003981	5	PBANKA_1029900	PF3D7_1412700	PcyM_1342400	PCYB_134400	AAA family ATPase, putative	FALSE
PVP01_0010050	PIR protein	NA	NA	NA	NA	NA	NA	NA	FALSE
PVP01_1145900	SDE2 domain-containing protein, putative	OG0000679	5	PBANKA_0101800	PF3D7_0603000	PcyM_1149000	PCYB_115340	SDE2 domain-containing protein, putative	TRUE
PVP01_1343700	GTPase-activating protein, putative	OG0001992	5	PBANKA_1037100	PF3D7_1405100	PcyM_1350900	PCYB_135140	GTPase-activating protein, putative	FALSE
PVP01_1408500	DNA-directed RNA polymerase subunit alpha, putative	OG0002885	5	PBANKA_1406100	PF3D7_1307600	PcyM_1409100	PCYB_141710	DNA-directed RNA polymerase subunit alpha, putative	FALSE
PVP01_0837600	ABC transporter B family member 4, putative	OG0003365	5	PBANKA_0401200	PF3D7_0302600	PcyM_0841900	PCYB_084660	ABC transporter B family member 4, putative	FALSE
PVP01_0832100	zinc finger protein, putative	OG0000946	5	PBANKA_0406400	PF3D7_0308100	PcyM_0836000	PCYB_084120	zinc finger protein, putative	FALSE
PVP01_0003130	PIR protein	NA	NA	NA	NA	NA	NA	NA	FALSE
PVP01_1304600	zinc finger protein, putative	OG0001150	5	PBANKA_0604200	PF3D7_1205500	PcyM_1305700	PCYB_131400	zinc finger protein, putative	FALSE
PVP01_1125700	tyrosine kinase-like protein, putative	OG0004087	5	PBANKA_1122700	PF3D7_0623800	PcyM_1126400	PCYB_113400	tyrosine kinase-like protein, putative	FALSE
PVP01_1328300	pantothenate kinase 1, putative	OG0001915	5	PBANKA_1022600	PF3D7_1420600	PcyM_1333300	PCYB_133660	pantothenate kinase 1, putative	FALSE
PVP01_1205500	tyrosine kinase-like protein, putative	OG0002839	5	PBANKA_1362100	PF3D7_1349300	PcyM_1206900	PCYB_121440	tyrosine kinase-like protein	FALSE
PVP01_1334900	26S proteasome regulatory subunit RPN13, putative	OG0001947	5	PBANKA_1028700	PF3D7_1414000	PcyM_1341000	PCYB_134270	26S proteasome regulatory subunit RPN13, putative	TRUE
PVP01_0002240	PIR protein	NA	NA	NA	NA	NA	NA	NA	FALSE
PVP01_1471600	Plasmodium exported protein, unknown function	NA	NA	NA	NA	NA	NA	NA	FALSE
PVP01_1101400	tryptophan-rich protein	OG0005339	3	NA	NA	PcyM_1100400	PCYB_111040	NA	FALSE
PVP01_0317900	rhoptry-associated leucine zipper-like protein 1	OG0003547	5	PBANKA_0619700	PF3D7_0722200	PcyM_0322500	PCYB_032600	rhoptry-associated leucine zipper-like protein 1	TRUE
PVP01_1018900	pre-mRNA-splicing factor CWC2, putative	OG0002079	5	PBANKA_1114600	PF3D7_0515000	PcyM_1017800	PCYB_102670	pre-mRNA-splicing factor CWC2, putative	FALSE
PVP01_0812800	NLI interacting factor-like phosphatase, putative	OG0002317	5	PBANKA_1211100	PF3D7_1012700	PcyM_0813300	PCYB_082250	NLI interacting factor-like phosphatase, putative	FALSE
PVP01_1342500	transcription elongation factor SPT6, putative	OG0001984	5	PBANKA_1036000	PF3D7_1406200	PcyM_1349800	PCYB_135020	transcription elongation factor SPT6, putative	TRUE
PVP01_0817000	conserved Plasmodium protein, unknown function	OG0004201	5	PBANKA_1215300	PF3D7_0323200	PcyM_0818000	PCYB_082660	conserved Plasmodium protein, unknown function	FALSE
PVP01_1027700	conserved protein, unknown function	OG0002035	5	PBANKA_1105900	PF3D7_0506300	PcyM_1027700	PCYB_103530	conserved protein, unknown function	FALSE
PVP01_0317400	secreted ookinete protein, putative	OG0003545	5	PBANKA_0619200	PF3D7_0721700	PcyM_0322000	PCYB_032560	secreted ookinete protein, putative	FALSE
PVP01_1315300	calmodulin, putative	OG0001851	5	PBANKA_1010600	PF3D7_1434200	PcyM_1317400	PCYB_132470	calmodulin	TRUE
PVP01_0509400	conserved Plasmodium protein, unknown function	OG0003563	5	PBANKA_0705700	PF3D7_0824900	PcyM_0508500	PCYB_051630	conserved Plasmodium protein, unknown function	FALSE
PVP01_1126500	chorismate synthase	OG0002119	5	PBANKA_1121900	PF3D7_0623000	PcyM_1127400	PCYB_113480	chorismate synthase	FALSE
PVP01_0005070	Plasmodium exported protein, unknown function	NA	NA	NA	NA	NA	NA	NA	FALSE
PVP01_1327200	conserved Plasmodium protein, unknown function	OG0003954	5	PBANKA_1021600	PF3D7_1421800	PcyM_1332000	PCYB_133550	conserved Plasmodium protein, unknown function	FALSE
PVP01_0000180	Plasmodium exported protein, unknown function	NA	NA	NA	NA	NA	NA	NA	FALSE
PVP01_1326200	actin-related protein ARP4, putative	OG0000492	5	PBANKA_1020600	PF3D7_1422800	PcyM_1331000	PCYB_133450	actin-related protein ARP4	FALSE
PVP01_1457000	protein kinase 2, putative	OG0003163	5	PBANKA_1453400	PF3D7_1238900	PcyM_1463100	PCYB_146460	protein kinase 2	TRUE
PVP01_1313100	conserved Plasmodium protein, unknown function	OG0003911	5	PBANKA_1008400	PF3D7_1436400	PcyM_1315100	PCYB_132250	conserved Plasmodium protein, unknown function	FALSE
PVP01_0003800	PIR protein	NA	NA	NA	NA	NA	NA	NA	FALSE
PVP01_0007220	PIR protein	NA	NA	NA	NA	NA	NA	NA	FALSE
PVP01_1454200	clustered-asparagine-rich protein, putative	OG0004672	5	PBANKA_1450700	PF3D7_1236100	PcyM_1460000	PCYB_146180	clustered-asparagine-rich protein	TRUE
PVP01_1226200	conserved Plasmodium protein, unknown function	OG0004438	5	PBANKA_1343400	PF3D7_1328200	PcyM_1229900	PCYB_123450	conserved Plasmodium protein, unknown function	TRUE
PVP01_0731500	importin alpha re-exporter, putative	OG0001555	5	PBANKA_0833600	PF3D7_0932800	PcyM_0734300	PCYB_074030	importin alpha re-exporter, putative	FALSE
PVP01_1232200	conserved Plasmodium protein, unknown function	OG0004416	5	PBANKA_1337700	PF3D7_1322400	PcyM_1237000	PCYB_124040	conserved Plasmodium protein, unknown function	TRUE
PVP01_0010540	gamma-glutamylcysteine synthetase, putative	NA	NA	NA	NA	NA	NA	NA	FALSE
PVP01_1262200	fructose 1,6-bisphosphate aldolase, putative	OG0000322	5	PBANKA_1308600	PF3D7_1444800	PcyM_1271000	PCYB_127030	fructose-bisphosphate aldolase	TRUE
PVP01_0416900	serine-repeat antigen 4 (SERA)	NA	NA	NA	NA	NA	NA	NA	FALSE
PVP01_1430800	histone acetyltransferase subunit NuA4, putative	OG0004597	5	PBANKA_1427900	PF3D7_0809500	PcyM_1432200	PCYB_143870	histone acetyltransferase subunit NuA4, putative	FALSE
PVP01_0936600	conserved Plasmodium protein, unknown function	OG0003794	5	PBANKA_0912900	PF3D7_1135700	PcyM_0940600	PCYB_094160	conserved Plasmodium protein, unknown function	FALSE
PVP01_0010630	PIR protein	NA	NA	NA	NA	NA	NA	NA	FALSE
PVP01_1239100	conserved Plasmodium protein, unknown function	OG0002681	5	PBANKA_1331000	PF3D7_1467700	PcyM_1245000	PCYB_124730	conserved Plasmodium protein, unknown function	TRUE
PVP01_0904300	CPW-WPC family protein	NA	NA	NA	NA	NA	NA	NA	FALSE
PVP01_0624500	PIR protein	NA	NA	NA	NA	NA	NA	NA	FALSE
PVP01_0409300	DNA-directed RNA polymerase II subunit RPB2, putative	OG0000885	5	PBANKA_0312400	PF3D7_0215700	PcyM_0406600	PCYB_041460	DNA-directed RNA polymerase II subunit RPB2, putative	FALSE
PVP01_0006240	Plasmodium exported protein, unknown function	NA	NA	NA	NA	NA	NA	NA	FALSE
PVP01_0006950	PIR protein	NA	NA	NA	NA	NA	NA	NA	FALSE
PVP01_MIT00400	ribosomal RNA fragment	NA	NA	NA	NA	NA	NA	NA	FALSE
PVP01_0705300	conserved Plasmodium protein, unknown function	OG0004782	4	PBANKA_0808380	PF3D7_0906890	PcyM_0704700	NA	conserved Plasmodium protein, unknown function	FALSE
PVP01_0903700	hypothetical protein	OG0005567	2	NA	NA	PcyM_0904700	NA	NA	FALSE
PVP01_1318600	PhIL1 interacting protein PIP3, putative	OG0001872	5	PBANKA_1013900	PF3D7_1430800	PcyM_1321600	PCYB_132790	PhIL1 interacting protein PIP3	FALSE
PVP01_0839900	PIR protein, pseudogene	NA	NA	NA	NA	NA	NA	NA	FALSE
PVP01_0602400	enoyl-CoA hydratase-related protein, putative	OG0001012	5	PBANKA_0501500	PF3D7_1017200	PcyM_0602500	PCYB_061150	enoyl-CoA hydratase-related protein, putative	TRUE
PVP01_0117500	conserved Plasmodium protein, unknown function	OG0004245	5	PBANKA_1227500	PF3D7_0802700	PcyM_0119800	PCYB_012430	conserved Plasmodium protein, unknown function	FALSE
PVP01_0715200	conserved Plasmodium protein, unknown function	OG0003685	5	PBANKA_0817800	PF3D7_0916800	PcyM_0715000	PCYB_072440	conserved Plasmodium protein, unknown function	FALSE
PVP01_0002740	PIR protein	NA	NA	NA	NA	NA	NA	NA	FALSE
PVP01_1303600	sexual stage-specific protein G37, putative	OG0001144	5	PBANKA_0603300	PF3D7_1204400	PcyM_1304500	PCYB_131310	sexual stage-specific protein G37, putative	FALSE
PVP01_0917000	guanine nucleotide-exchange factor SEC12, putative	OG0001735	5	PBANKA_0931600	PF3D7_1116400	PcyM_0918900	PCYB_092250	guanine nucleotide-exchange factor SEC12	FALSE
PVP01_1339300	conserved Plasmodium protein, unknown function	NA	NA	NA	NA	NA	NA	NA	FALSE
PVP01_1318200	OST-HTH associated domain protein, putative	OG0005121	4	NA	PF3D7_1431200	PcyM_1321200	PCYB_132750	OST-HTH associated domain protein, putative	FALSE
PVP01_0515500	U3 small nucleolar ribonucleoprotein protein IMP4, putative	OG0003583	5	PBANKA_0712000	PF3D7_0818800	PcyM_0515500	PCYB_052230	U3 small nucleolar ribonucleoprotein protein IMP4, putative	TRUE
PVP01_0735300	PIR protein	NA	NA	NA	NA	NA	NA	NA	FALSE
PVP01_1023200	WD repeat-containing protein, putative	NA	NA	NA	NA	NA	NA	NA	FALSE
PVP01_1432400	dynein light chain 1, putative	OG0003031	5	PBANKA_1429400	PF3D7_1213600	PcyM_1433900	PCYB_144020	dynein light chain 1, putative	TRUE
PVP01_0816100	conserved Plasmodium protein, unknown function	OG0004196	5	PBANKA_1214400	PF3D7_1016000	PcyM_0816800	PCYB_082580	conserved Plasmodium protein, unknown function	TRUE
PVP01_0528500	conserved Plasmodium protein, unknown function	OG0003612	5	PBANKA_0721200	PF3D7_0419100	PcyM_0529200	PCYB_053340	conserved Plasmodium protein, unknown function	FALSE
PVP01_0000720	PIR protein	NA	NA	NA	NA	NA	NA	NA	FALSE
PVP01_1320300	ribosomal protein L15, apicoplast, putative	OG0001884	5	PBANKA_1015600	PF3D7_1429100	PcyM_1323400	PCYB_132960	ribosomal protein L15, apicoplast, putative	FALSE
PVP01_1208800	dynactin subunit 2, putative	OG0002826	5	PBANKA_1358900	PF3D7_1346000	PcyM_1210400	PCYB_121770	dynactin subunit 2, putative	TRUE
PVP01_0713700	heptatricopeptide repeat-containing protein, putative	OG0001466	5	PBANKA_0816300	PF3D7_0915300	PcyM_0713500	PCYB_072290	heptatricopeptide repeat-containing protein, putative	FALSE
PVP01_0949650	PIR protein, pseudogene	NA	NA	NA	NA	NA	NA	NA	FALSE
PVP01_0709200	actin-like protein, putative	OG0001440	5	PBANKA_0811800	PF3D7_0910700	PcyM_0709000	PCYB_071850	actin-like protein, putative	TRUE
PVP01_0008460	PIR protein	NA	NA	NA	NA	NA	NA	NA	FALSE
PVP01_0949000	tryptophan-rich protein	NA	NA	NA	NA	NA	NA	NA	FALSE
PVP01_1306000	conserved Plasmodium protein, unknown function	OG0003503	5	PBANKA_0605500	PF3D7_1206900	PcyM_1307300	PCYB_131550	conserved Plasmodium protein, unknown function	FALSE
PVP01_1011900	conserved Plasmodium protein, unknown function	OG0004259	5	PBANKA_1236700	PF3D7_0522000	PcyM_1009800	PCYB_101970	conserved Plasmodium protein, unknown function	TRUE
PVP01_1321100	major facilitator superfamily domain-containing protein, putative	OG0003935	5	PBANKA_1016400	PF3D7_1428200	PcyM_1324400	PCYB_133050	major facilitator superfamily domain-containing protein, putative	FALSE
PVP01_1028300	conserved Plasmodium protein, unknown function	OG0004026	5	PBANKA_1105300	PF3D7_0505700	PcyM_1028300	PCYB_103590	conserved Plasmodium membrane protein, unknown function	FALSE
PVP01_0210300	4-hydroxy-3-methylbut-2-enyl diphosphate reductase, putative	OG0000792	5	PBANKA_0208700	PF3D7_0104400	PcyM_0213400	PCYB_021940	4-hydroxy-3-methylbut-2-enyl diphosphate reductase	FALSE
PVP01_1241800	cytochrome c oxidase subunit ApiCOX25, putative	OG0002664	5	PBANKA_1328400	PF3D7_1465000	PcyM_1247800	PCYB_125000	cytochrome c oxidase subunit ApiCOX25, putative	FALSE
PVP01_0514300	Snf2-related CBP activator, putative, pseudogene	NA	NA	NA	NA	NA	NA	NA	FALSE
PVP01_1427100	CS domain protein, putative	OG0003001	5	PBANKA_1424400	PF3D7_0813200	PcyM_1428300	PCYB_143510	CS domain protein, putative	FALSE
PVP01_API02900	hypothetical protein	OG0004841	4	PBANKA_API00270	PF3D7_API03000	PcyM_API01800	NA	probable protein, unknown function	FALSE
PVP01_0109400	cloroquine resistance associated protein cg1, putative	OG0002361	5	PBANKA_1219600	PF3D7_0709100	PcyM_0110400	PCYB_011620	Cg1 protein	TRUE
PVP01_0904500	casein kinase II beta chain, putative	OG0001800	5	PBANKA_0943200	PF3D7_1103700	PcyM_0905500	PCYB_091080	casein kinase II beta chain	FALSE
PVP01_0302400	pre-mRNA splicing factor, putative	OG0003879	5	PBANKA_1000800	PF3D7_0403200	PcyM_0304900	PCYB_031080	pre-mRNA splicing factor, putative	FALSE
PVP01_1433300	conserved Plasmodium protein, unknown function	OG0004604	5	PBANKA_1430300	PF3D7_1214500	PcyM_1434800	PCYB_144100	conserved Plasmodium protein, unknown function	FALSE
PVP01_0003760	PIR protein	NA	NA	NA	NA	NA	NA	NA	FALSE
PVP01_1467100	rRNA-processing protein FCF2, putative	OG0004708	5	PBANKA_1462900	PF3D7_1250000	PcyM_1474000	PCYB_147440	rRNA-processing protein FCF2, putative	FALSE
PVP01_0001720	Plasmodium exported protein, unknown function	NA	NA	NA	NA	NA	NA	NA	FALSE
PVP01_1004200	heptatricopeptide repeat-containing protein, putative	OG0002504	5	PBANKA_1244100	PF3D7_0529700	PcyM_1001900	PCYB_101220	heptatricopeptide repeat-containing protein, putative	FALSE
PVP01_0000130	tryptophan-rich protein	OG0005131	3	NA	NA	PcyM_0013100	PCYB_001790	NA	FALSE
PVP01_0815900	ribonucleoside-diphosphate reductase small chain, putative	OG0004195	5	PBANKA_1214200	PF3D7_1015800	PcyM_0816500	PCYB_082560	ribonucleoside-diphosphate reductase small chain, putative	FALSE
PVP01_0530300	conserved Plasmodium protein, unknown function	OG0003479	5	PBANKA_0522200	PF3D7_0421800	PcyM_0531300	PCYB_053520	conserved Plasmodium protein, unknown function	TRUE
PVP01_0401700	PIR protein	NA	NA	NA	NA	NA	NA	NA	FALSE
PVP01_1465200	methyltransferase, putative	OG0003209	5	PBANKA_1461000	PF3D7_1248100	PcyM_1471700	PCYB_147250	methyltransferase, putative	FALSE
PVP01_1030800	hypothetical protein	OG0005524	3	NA	NA	PcyM_1031000	PCYB_103840	NA	FALSE
PVP01_0909700	tetratricopeptide repeat protein, putative	OG0001772	5	PBANKA_0938100	PF3D7_1108900	PcyM_0910900	PCYB_091580	tetratricopeptide repeat protein, putative	FALSE
PVP01_0820600	elongation factor 1-delta, putative	OG0000539	5	PBANKA_1218900	PF3D7_0319600	PcyM_0822300	PCYB_083020	elongation factor 1-delta, putative	TRUE
PVP01_0524800	Plasmodium exported protein (PHIST), unknown function, pseudogene	NA	NA	NA	NA	NA	NA	NA	FALSE
PVP01_0008270	PIR protein	NA	NA	NA	NA	NA	NA	NA	FALSE
PVP01_1130100	cell division cycle protein 48 homologue, putative	NA	NA	NA	NA	NA	NA	NA	TRUE
PVP01_0503200	PIR protein	NA	NA	NA	NA	NA	NA	NA	FALSE
PVP01_0100800	PIR protein	NA	NA	NA	NA	NA	NA	NA	FALSE
PVP01_0203900	P-loop containing nucleoside triphosphate hydrolase, putative	OG0000752	5	PBANKA_0202500	PF3D7_0111300	PcyM_0205300	PCYB_021320	P-loop containing nucleoside triphosphate hydrolase, putative	FALSE
PVP01_1119600	sec14-like cytosolic factor or phosphatidylinositol/phosphatidylcholine transfer protein, putative	OG0004106	5	PBANKA_1128700	PF3D7_0629900	PcyM_1120000	PCYB_112810	sec14-like cytosolic factor or phosphatidylinositol/phosphatidylcholine transfer protein, putative	FALSE
PVP01_1021200	orotate phosphoribosyltransferase, putative	OG0002066	5	PBANKA_1112400	PF3D7_0512700	PcyM_1020200	PCYB_102890	orotate phosphoribosyltransferase	FALSE
PVP01_0903800	conserved Plasmodium protein, unknown function	OG0004857	3	NA	NA	PcyM_0904800	PCYB_091020	NA	FALSE
PVP01_0006690	PIR protein	NA	NA	NA	NA	NA	NA	NA	FALSE
PVP01_1201900	Plasmodium exported protein, unknown function	OG0004983	4	NA	PF3D7_1352900	PcyM_1203100	PCYB_121080	Plasmodium exported protein, unknown function	FALSE
PVP01_1200100	PIR protein	NA	NA	NA	NA	NA	NA	NA	FALSE
PVP01_1118300	Ran-binding protein, putative	OG0004110	5	PBANKA_1130000	PF3D7_1353400	PcyM_1118600	PCYB_112680	Ran-binding protein, putative	FALSE
PVP01_0508700	cytochrome c oxidase assembly factor 5, putative	OG0001285	5	PBANKA_0705000	PF3D7_0825600	PcyM_0507800	PCYB_051560	cytochrome c oxidase assembly factor 5, putative	FALSE
PVP01_0301500	Plasmodium exported protein, unknown function	OG0005500	3	NA	NA	PcyM_0304100	PCYB_031030	NA	FALSE
PVP01_1260800	M17 leucyl aminopeptidase	OG0000323	5	PBANKA_1309900	PF3D7_1446200	PcyM_1269600	PCYB_126890	M17 leucyl aminopeptidase	TRUE
PVP01_1104700	conserved Plasmodium protein, unknown function	OG0004145	5	PBANKA_1143200	PF3D7_1367300	PcyM_1103900	PCYB_111320	conserved Plasmodium protein, unknown function	FALSE
PVP01_1432000	mediator of RNA polymerase II transcription subunit 18, putative	OG0000619	5	PBANKA_1429000	PF3D7_1213200	PcyM_1433500	PCYB_143980	mediator of RNA polymerase II transcription subunit 18, putative	FALSE
PVP01_0801400	Plasmodium exported protein, unknown function	NA	NA	NA	NA	NA	NA	NA	FALSE
PVP01_1025700	triose phosphate transporter, putative	OG0002047	5	PBANKA_1107900	PF3D7_0508300	PcyM_1025400	PCYB_103330	triose phosphate transporter	FALSE
PVP01_0944000	DNA-directed RNA polymerases I and III subunit RPAC1, putative	OG0001588	5	PBANKA_0905700	PF3D7_1143300	PcyM_0948100	PCYB_094890	DNA-directed RNA polymerases I and III subunit RPAC1, putative	FALSE
PVP01_0006890	PIR protein	NA	NA	NA	NA	NA	NA	NA	FALSE
PVP01_1417100	ADP-ribosylation factor, putative	OG0004559	5	PBANKA_1414700	PF3D7_1316200	PcyM_1417900	PCYB_142560	ADP-ribosylation factor, putative	FALSE
PVP01_0408000	conserved Plasmodium protein, unknown function	OG0003357	5	PBANKA_0313700	PF3D7_0217000	PcyM_0405100	PCYB_041330	conserved Plasmodium membrane protein, unknown function	FALSE
PVP01_0009980	PIR protein	NA	NA	NA	NA	NA	NA	NA	FALSE
PVP01_0805700	IMP1-like protein, putative	OG0002273	5	PBANKA_1204200	PF3D7_1006000	PcyM_0805500	PCYB_081530	IMP1-like protein, putative	FALSE
PVP01_0114900	phosphatidic acid phosphatase 2, putative	OG0004948	4	NA	PF3D7_0805600	PcyM_0116600	PCYB_012160	phosphatidic acid phosphatase 2	FALSE
PVP01_0946000	cysteine-rich PDZ-binding protein, putative	OG0001576	5	PBANKA_0903700	PF3D7_1145300	PcyM_0950400	PCYB_095090	cysteine-rich PDZ-binding protein, putative	TRUE
PVP01_1142700	ubiquitin-conjugating enzyme E2 PEX4, putative	OG0000701	5	PBANKA_0105000	PF3D7_0606200	PcyM_1145900	PCYB_115020	ubiquitin-conjugating enzyme E2 PEX4, putative	FALSE
PVP01_1231400	V-type proton ATPase subunit G, putative	OG0002724	5	PBANKA_1338400	PF3D7_1323200	PcyM_1236200	PCYB_123960	V-type proton ATPase subunit G, putative	FALSE
PVP01_1401200	Plasmodium exported protein, unknown function	OG0005123	3	NA	NA	PcyM_1401800	PCYB_141010	NA	FALSE
PVP01_0009690	Plasmodium exported protein, unknown function	NA	NA	NA	NA	NA	NA	NA	FALSE
PVP01_0711000	conserved Plasmodium protein, unknown function	OG0003670	5	PBANKA_0813600	PF3D7_0912600	PcyM_0710800	PCYB_072030	conserved Plasmodium protein, unknown function	FALSE
PVP01_0500600	PIR protein, pseudogene	NA	NA	NA	NA	NA	NA	NA	FALSE
PVP01_0825800	DER1-like protein, putative	OG0003393	5	PBANKA_0412000	PF3D7_0314300	PcyM_0827900	PCYB_083550	DER1-like protein	FALSE
PVP01_0002320	PIR protein	NA	NA	NA	NA	NA	NA	NA	FALSE
PVP01_0917300	dipeptidyl aminopeptidase 1, putative	OG0001732	5	PBANKA_0931300	PF3D7_1116700	PcyM_0919200	PCYB_092280	dipeptidyl aminopeptidase 1	TRUE
PVP01_0840100	Plasmodium exported protein, unknown function	NA	NA	NA	NA	NA	NA	NA	FALSE
PVP01_1468200	conserved Plasmodium protein, unknown function	OG0004712	5	PBANKA_1464000	PF3D7_1251100	PcyM_1475200	PCYB_147550	conserved Plasmodium protein, unknown function	TRUE
PVP01_1467400	vacuolar protein sorting-associated protein 26, putative	OG0003219	5	PBANKA_1463200	PF3D7_1250300	PcyM_1474300	PCYB_147470	vacuolar protein sorting-associated protein 26, putative	FALSE
PVP01_0932100	conserved Plasmodium protein, unknown function	OG0003809	5	PBANKA_0916900	PF3D7_1131300	PcyM_0936000	PCYB_093730	conserved Plasmodium protein, unknown function	FALSE
PVP01_0730400	PIH1 domain-containing protein, putative	OG0003737	5	PBANKA_0832500	PF3D7_0931700	PcyM_0732900	PCYB_073920	PIH1 domain-containing protein, putative	FALSE
PVP01_0912300	acylphosphatase, putative	OG0001757	5	PBANKA_0936100	PF3D7_1111500	PcyM_0913600	PCYB_091780	acylphosphatase, putative	FALSE
PVP01_0513300	conserved Plasmodium protein, unknown function	OG0004781	5	PBANKA_0709800	PF3D7_0821000	PcyM_0513000	PCYB_052020	conserved Plasmodium protein, unknown function	FALSE
PVP01_1338500	rhoptry-associated protein 1	OG0003991	5	PBANKA_1032100	PF3D7_1410400	PcyM_1345100	PCYB_134630	rhoptry-associated protein 1	FALSE
PVP01_0115100	N-acetyltransferase, GNAT family, putative	OG0002386	5	PBANKA_1225200	PF3D7_0805400	PcyM_0116800	PCYB_012180	N-acetyltransferase, GNAT family, putative	FALSE
PVP01_0010420	PIR protein	NA	NA	NA	NA	NA	NA	NA	FALSE
PVP01_0921400	conserved Plasmodium protein, unknown function	OG0003834	5	PBANKA_0927500	PF3D7_1120800	PcyM_0923800	PCYB_092685	conserved Plasmodium protein, unknown function	FALSE
PVP01_0113100	ras-related protein Rab-18, putative	OG0002378	5	PBANKA_1223300	PF3D7_0807300	PcyM_0114400	PCYB_011990	ras-related protein Rab-18	FALSE
PVP01_1222300	nucleotidyltransferase, putative	OG0000590	5	PBANKA_1347200	PF3D7_1332400	PcyM_1225200	PCYB_123030	nucleotidyltransferase, putative	FALSE
PVP01_1249500	conserved Plasmodium protein, unknown function	OG0004360	5	PBANKA_1321100	PF3D7_1457400	PcyM_1256000	PCYB_125770	conserved Plasmodium protein, unknown function	FALSE
PVP01_0007970	PIR protein	NA	NA	NA	NA	NA	NA	NA	FALSE
PVP01_0007860	PIR protein	NA	NA	NA	NA	NA	NA	NA	FALSE
PVP01_1257700	transcription factor IIIb subunit, putative	OG0002580	5	PBANKA_1313000	PF3D7_1449300	PcyM_1266000	PCYB_126580	transcription factor IIIb subunit, putative	FALSE
PVP01_1253200	glucose-6-phosphate dehydrogenase-6-phosphogluconolactonase	OG0000567	5	PBANKA_1317500	PF3D7_1453800	PcyM_1261300	PCYB_126150	glucose-6-phosphate dehydrogenase-6-phosphogluconolactonase	FALSE
PVP01_0104400	tRNA m5C-methyltransferase, putative	OG0000425	5	PBANKA_0801900	PF3D7_0704200	PcyM_0104500	PCYB_011160	tRNA m5C-methyltransferase, putative	TRUE
PVP01_0001970	PIR protein, pseudogene	NA	NA	NA	NA	NA	NA	NA	FALSE
PVP01_0205400	rRNA biogenesis protein RRP36, putative	OG0000762	5	PBANKA_0203900	PF3D7_0109700	PcyM_0207500	PCYB_021460	rRNA biogenesis protein RRP36, putative	TRUE
PVP01_0008520	PIR protein	NA	NA	NA	NA	NA	NA	NA	FALSE
PVP01_0907200	conserved Plasmodium protein, unknown function	OG0003870	5	PBANKA_0940500	PF3D7_1106400	PcyM_0908200	PCYB_091340	conserved Plasmodium protein, unknown function	FALSE
PVP01_0213500	cation transporting ATPase, putative	OG0000807	5	PBANKA_0211900	PF3D7_0727800	PcyM_0217000	PCYB_022270	cation transporting ATPase, putative	FALSE
PVP01_0217000	heat shock protein, putative	NA	NA	NA	NA	NA	NA	NA	FALSE
PVP01_1434900	conserved protein, unknown function	OG0004608	5	PBANKA_1431800	PF3D7_1216100	PcyM_1436400	PCYB_144250	conserved protein, unknown function	FALSE
PVP01_1419900	conserved Plasmodium protein, unknown function	OG0004565	5	PBANKA_1417500	PF3D7_1319000	PcyM_1420800	PCYB_142820	conserved Plasmodium protein, unknown function	FALSE
PVP01_0517100	14-3-3 protein, putative	OG0001327	5	PBANKA_0712600	PF3D7_0818200	PcyM_0516800	PCYB_052350	14-3-3 protein	TRUE
PVP01_0205500	cold-shock protein, putative	OG0000763	5	PBANKA_0204000	PF3D7_0109600	PcyM_0207600	PCYB_021470	cold-shock protein, putative	FALSE
PVP01_0905900	histone 2B, putative	NA	NA	NA	NA	NA	NA	NA	TRUE
PVP01_0000970	PIR protein, pseudogene	NA	NA	NA	NA	NA	NA	NA	FALSE
PVP01_1464300	conserved protein, unknown function	OG0003204	5	PBANKA_1460200	PF3D7_1247200	PcyM_1470800	PCYB_147170	conserved protein, unknown function	FALSE
PVP01_0007150	PIR protein	NA	NA	NA	NA	NA	NA	NA	FALSE
PVP01_0822900	cdc2-related protein kinase 4, putative	OG0003651	5	PBANKA_0808000	PF3D7_0317200	PcyM_0824700	PCYB_083250	cdc2-related protein kinase 4	TRUE
PVP01_0001850	PIR protein	NA	NA	NA	NA	NA	NA	NA	FALSE
PVP01_0219500	PIR protein	NA	NA	NA	NA	NA	NA	NA	FALSE
PVP01_1329700	thioredoxin-like protein, putative	OG0004799	4	PBANKA_1024000	PF3D7_1419200	PcyM_1335000	NA	thioredoxin-like protein, putative	TRUE
PVP01_1120300	DnaJ protein, putative	OG0002152	5	PBANKA_1127800	PF3D7_0629200	PcyM_1120900	PCYB_112880	DnaJ protein, putative	TRUE
PVP01_0400500	PIR protein	NA	NA	NA	NA	NA	NA	NA	FALSE
PVP01_0931400	methyltransferase, putative	OG0001643	5	PBANKA_0917700	PF3D7_1130600	PcyM_0935300	PCYB_093660	methyltransferase, putative	FALSE
PVP01_1431800	bromodomain protein 2, putative	OG0003030	5	PBANKA_1428900	PF3D7_1212900	PcyM_1433300	PCYB_143970	bromodomain protein 2, putative	TRUE
PVP01_1216400	elongation factor 1-gamma, putative	OG0002788	5	PBANKA_1352000	PF3D7_1338300	PcyM_1218800	PCYB_122460	elongation factor 1-gamma, putative	FALSE
PVP01_0728600	heptatricopeptide repeat-containing protein, putative	OG0003728	5	PBANKA_0830800	PF3D7_0930100	PcyM_0730900	PCYB_073740	heptatricopeptide repeat-containing protein, putative	FALSE
PVP01_1205800	conserved Plasmodium protein, unknown function	OG0004505	5	PBANKA_1361800	PF3D7_1349000	PcyM_1207300	PCYB_121470	conserved Plasmodium protein, unknown function	TRUE
PVP01_1201700	membrane associated histidine-rich protein 2	OG0005112	3	NA	NA	PcyM_1202900	PCYB_121060	NA	FALSE
PVP01_1017700	tRNA pseudouridine synthase, putative	OG0002427	5	PBANKA_1231100	PF3D7_0516300	PcyM_1016400	PCYB_102550	tRNA pseudouridine synthase, putative	FALSE
PVP01_0728400	conserved Plasmodium protein, unknown function	OG0003727	5	PBANKA_0830600	PF3D7_0929900	PcyM_0730700	PCYB_073720	conserved Plasmodium protein, unknown function	FALSE
PVP01_0727800	conserved Plasmodium protein, unknown function	OG0003725	5	PBANKA_0830100	PF3D7_0929300	PcyM_0729500	PCYB_073670	conserved Plasmodium protein, unknown function	FALSE
PVP01_0001150	PIR protein	NA	NA	NA	NA	NA	NA	NA	FALSE
PVP01_1246500	60S ribosomal protein L29, putative	OG0002642	5	PBANKA_1324000	PF3D7_1460300	PcyM_1253000	PCYB_125470	60S ribosomal protein L29, putative	TRUE
PVP01_0610600	conserved Plasmodium protein, unknown function	OG0003444	5	PBANKA_0509600	PF3D7_1025400	PcyM_0613000	PCYB_061970	conserved Plasmodium membrane protein, unknown function	FALSE
PVP01_0010230	PIR protein	NA	NA	NA	NA	NA	NA	NA	FALSE
PVP01_0010820	PIR protein	NA	NA	NA	NA	NA	NA	NA	FALSE
PVP01_0925800	ATP synthase F0 subunit b-like protein, putative	OG0001672	5	PBANKA_0923200	PF3D7_1125100	PcyM_0929100	PCYB_093120	ATP synthase F0 subunit b-like protein, putative	FALSE
PVP01_1307800	conserved protein, unknown function	OG0001166	5	PBANKA_0607200	PF3D7_1208700	PcyM_1309300	PCYB_131730	conserved protein, unknown function	FALSE
PVP01_0532000	glideosome associated protein with multiple membrane spans 2, putative	OG0001129	5	PBANKA_0523900	PF3D7_0423500	PcyM_0533200	PCYB_053690	glideosome associated protein with multiple membrane spans 2	TRUE
PVP01_1027400	histone deacetylase, putative	OG0004803	4	PBANKA_1106200	NA	PcyM_1027400	PCYB_103500	NA	FALSE
PVP01_0707200	tRNA pseudouridine synthase, putative	OG0001428	5	PBANKA_0809900	PF3D7_0908700	PcyM_0706900	PCYB_071650	tRNA pseudouridine synthase, putative	FALSE
PVP01_0621400	DNA polymerase zeta catalytic subunit, putative	OG0004908	4	NA	PF3D7_1037000	PcyM_0626400	PCYB_063060	DNA polymerase zeta catalytic subunit, putative	FALSE
PVP01_0932300	conserved Plasmodium protein, unknown function	OG0003807	5	PBANKA_0916700	PF3D7_1131500	PcyM_0936200	PCYB_093750	conserved Plasmodium protein, unknown function	FALSE
PVP01_1403300	conserved protein, unknown function	OG0002859	5	PBANKA_1400900	PF3D7_1302400	PcyM_1403800	PCYB_141190	conserved protein, unknown function	FALSE
PVP01_1330800	liver specific protein 1, putative	OG0003968	5	PBANKA_1024600	PF3D7_1418100	PcyM_1336200	PCYB_133860	liver specific protein 1, putative	TRUE
PVP01_0006130	PIR protein	NA	NA	NA	NA	NA	NA	NA	FALSE
PVP01_1204200	conserved Plasmodium protein, unknown function	OG0004511	5	PBANKA_1363400	PF3D7_1350600	PcyM_1205600	PCYB_121310	conserved Plasmodium protein, unknown function	FALSE
PVP01_1256500	conserved Plasmodium protein, unknown function	OG0002589	5	PBANKA_1314200	PF3D7_1450500	PcyM_1264800	PCYB_126460	conserved Plasmodium protein, unknown function	FALSE
PVP01_1421700	RNA-binding protein, putative	OG0002971	5	PBANKA_1419200	PF3D7_1320900	PcyM_1422700	PCYB_143000	RNA-binding protein, putative	FALSE
PVP01_0715500	N-glycosylase/DNA lyase, putative	OG0001476	5	PBANKA_0818100	PF3D7_0917100	PcyM_0715400	PCYB_072470	N-glycosylase/DNA lyase, putative	FALSE
PVP01_0722400	polyadenylate-binding protein 2, putative	OG0001511	5	PBANKA_0824800	PF3D7_0923900	PcyM_0722900	PCYB_073150	polyadenylate-binding protein 2, putative	FALSE
PVP01_1448200	TBC domain-containing protein, putative	OG0003118	5	PBANKA_1444700	PF3D7_1230000	PcyM_1452400	PCYB_145560	TBC domain-containing protein, putative	FALSE
PVP01_0008900	Plasmodium exported protein, unknown function	NA	NA	NA	NA	NA	NA	NA	FALSE
PVP01_1344100	cysteine-rich small secreted protein CSS, putative	OG0004005	5	PBANKA_1037400	PF3D7_1404700	PcyM_1351400	PCYB_135180	cysteine-rich small secreted protein CSS, putative	TRUE
PVP01_0619200	conserved protein, unknown function	OG0001100	5	PBANKA_0517900	PF3D7_1034100	PcyM_0623800	PCYB_062840	conserved protein, unknown function	FALSE
PVP01_1409100	CCAAT-binding transcription factor, putative	OG0004536	5	PBANKA_1406600	PF3D7_1308100	PcyM_1409700	PCYB_141760	CCAAT-binding transcription factor, putative	FALSE
PVP01_0006160	Plasmodium exported protein, unknown function	NA	NA	NA	NA	NA	NA	NA	FALSE
PVP01_0929000	multiprotein-bridging factor 1, putative	OG0001655	5	PBANKA_0920000	PF3D7_1128200	PcyM_0932800	PCYB_093450	multiprotein-bridging factor 1, putative	FALSE
PVP01_1215700	tRNA Methionine	NA	NA	NA	NA	NA	NA	NA	FALSE
PVP01_0624300	PIR protein	NA	NA	NA	NA	NA	NA	NA	FALSE
PVP01_0008090	PIR protein	NA	NA	NA	NA	NA	NA	NA	FALSE
PVP01_MIT03200	ribosomal RNA fragment	NA	NA	NA	NA	NA	NA	NA	FALSE
PVP01_1122600	ribosomal protein L46, mitochondrial, putative	OG0002140	5	PBANKA_1125700	PF3D7_0626900	PcyM_1123300	PCYB_113110	ribosomal protein L46, mitochondrial, putative	FALSE
PVP01_1270900	hypothetical protein	OG0005225	3	NA	NA	PcyM_1280400	PCYB_127880	NA	FALSE
PVP01_0520700	calmodulin-like protein	OG0000423	5	PBANKA_0716200	PF3D7_0414200	PcyM_0522300	PCYB_052730	calmodulin-like protein	TRUE
PVP01_1340900	plasmepsin IV, putative	NA	NA	NA	NA	NA	NA	NA	TRUE
PVP01_0003320	PIR protein	NA	NA	NA	NA	NA	NA	NA	FALSE
PVP01_1020500	GTP-binding protein YihA1, putative	OG0002071	5	PBANKA_1113100	PF3D7_0513400	PcyM_1019400	PCYB_102820	GTP-binding protein YihA1	FALSE
PVP01_0307200	AAA family ATPase, putative	OG0001823	5	PBANKA_1005500	PF3D7_0407900	PcyM_0310300	PCYB_031560	AAA family ATPase, putative	FALSE
PVP01_1219300	MSP7-like protein	OG0005343	3	NA	NA	PcyM_1222000	PCYB_122740	NA	FALSE
PVP01_0516300	Plasmodium exported protein (PHIST), unknown function	NA	NA	NA	NA	NA	NA	NA	FALSE
PVP01_0319200	dynactin subunit 5, putative	OG0001246	5	PBANKA_0621000	PF3D7_0723500	PcyM_0323800	PCYB_032730	dynactin subunit 5, putative	FALSE
PVP01_1009500	ribosome-interacting GTPase 1, putative	OG0002475	5	PBANKA_1239200	PF3D7_0524400	PcyM_1007300	PCYB_101730	ribosome-interacting GTPase 1, putative	TRUE
PVP01_0813100	zinc finger protein, putative	OG0000315	5	PBANKA_1211400	PF3D7_1013000	PcyM_0813600	PCYB_082280	zinc finger protein, putative	TRUE
PVP01_0003000	PIR protein	NA	NA	NA	NA	NA	NA	NA	FALSE
PVP01_1243400	DNA-directed RNA polymerase III subunit RPC4, putative	OG0002659	5	PBANKA_1327000	PF3D7_1463400	PcyM_1249400	PCYB_125160	DNA-directed RNA polymerase III subunit RPC4, putative	FALSE
PVP01_0002500	PIR protein	NA	NA	NA	NA	NA	NA	NA	FALSE
PVP01_0512000	small nuclear ribonucleoprotein G, putative	OG0001305	5	PBANKA_0708400	PF3D7_0822300	PcyM_0511500	PCYB_051890	small nuclear ribonucleoprotein G, putative	FALSE
PVP01_0010770	reticulocyte binding protein 1a, putative	NA	NA	NA	NA	NA	NA	NA	FALSE
PVP01_1429800	protein phosphatase PPM7, putative	OG0003019	5	PBANKA_1427000	PF3D7_0810500	PcyM_1431200	PCYB_143770	protein phosphatase PPM7, putative	FALSE
PVP01_1456600	conserved Plasmodium protein, unknown function	OG0004681	5	PBANKA_1453000	PF3D7_1238500	PcyM_1462700	PCYB_146420	conserved Plasmodium protein, unknown function	TRUE
PVP01_1245000	conserved Plasmodium protein, unknown function	OG0004373	4	PBANKA_1325500	NA	PcyM_1251100	PCYB_125320	NA	FALSE
PVP01_1451200	elongation factor G, putative	OG0003132	5	PBANKA_1447700	PF3D7_1233000	PcyM_1455900	PCYB_145870	elongation factor G	FALSE
PVP01_0418600	DNA-directed RNA polymerase III subunit RPC10, putative	OG0000845	5	PBANKA_0304200	PF3D7_0206600	PcyM_0418200	PCYB_042370	DNA-directed RNA polymerase III subunit RPC10, putative	FALSE
PVP01_1408000	U3 small nucleolar RNA-associated protein 6, putative	OG0004531	5	PBANKA_1405600	PF3D7_1307100	PcyM_1408600	PCYB_141660	U3 small nucleolar RNA-associated protein 6, putative	FALSE
PVP01_1252100	conserved protein, unknown function	OG0004351	5	PBANKA_1318600	PF3D7_1454900	PcyM_1260100	PCYB_126040	conserved protein, unknown function	FALSE
PVP01_1216900	calcium-dependent protein kinase 5, putative	OG0002784	5	PBANKA_1351500	PF3D7_1337800	PcyM_1219600	PCYB_122510	calcium-dependent protein kinase 5	FALSE
PVP01_0507100	conserved Plasmodium protein, unknown function	OG0003559	5	PBANKA_0703400	PF3D7_0827300	PcyM_0506100	PCYB_051400	conserved Plasmodium protein, unknown function	FALSE
PVP01_1235200	conserved Plasmodium protein, unknown function	NA	NA	NA	NA	NA	NA	NA	FALSE
PVP01_1021500	conserved Plasmodium protein, unknown function	OG0004804	4	PBANKA_1112100	NA	PcyM_1020600	PCYB_102920	NA	FALSE
PVP01_1421500	conserved Plasmodium protein, unknown function	OG0002969	5	PBANKA_1419000	PF3D7_1320700	PcyM_1422500	PCYB_142980	conserved Plasmodium protein, unknown function	FALSE
PVP01_1122400	ankyrin-repeat protein, putative	OG0002141	5	PBANKA_1125900	PF3D7_0627100	PcyM_1123100	PCYB_113090	ankyrin-repeat protein, putative	TRUE
PVP01_0808500	nucleolar protein 5, putative	OG0002293	5	PBANKA_1207000	PF3D7_1008800	PcyM_0808400	PCYB_081810	nucleolar protein 5, putative	TRUE
PVP01_0000290	PIR protein	NA	NA	NA	NA	NA	NA	NA	FALSE
PVP01_1435200	conserved Plasmodium protein, unknown function	OG0004610	5	PBANKA_1432100	PF3D7_1216400	PcyM_1436700	PCYB_144280	conserved Plasmodium membrane protein, unknown function	TRUE
PVP01_0928300	CRAL/TRIO domain-containing protein, putative	OG0001659	5	PBANKA_0920800	PF3D7_1127600	PcyM_0932000	PCYB_093370	CRAL/TRIO domain-containing protein, putative	TRUE
PVP01_0003560	PIR protein	NA	NA	NA	NA	NA	NA	NA	FALSE
PVP01_0210900	actin-related protein ARP1, putative	OG0000365	5	PBANKA_0209300	PF3D7_0103800	PcyM_0214100	PCYB_022010	actin-related protein ARP1, putative	TRUE
PVP01_1209800	conserved Plasmodium protein, unknown function	OG0004486	5	PBANKA_1357900	PF3D7_1345000	PcyM_1211400	PCYB_121870	conserved Plasmodium protein, unknown function	FALSE
PVP01_1107900	6-cysteine protein P92	OG0005106	4	NA	PF3D7_1364100	PcyM_1107300	PCYB_111650	6-cysteine protein P92	FALSE
PVP01_1315600	protein kinase, putative	OG0001854	5	PBANKA_1010900	PF3D7_1433900	PcyM_1317700	PCYB_132500	protein kinase, putative	TRUE
PVP01_0004460	PIR protein	NA	NA	NA	NA	NA	NA	NA	FALSE
PVP01_1142200	coatomer alpha subunit, putative	OG0000704	5	PBANKA_0105400	PF3D7_0606700	PcyM_1145400	PCYB_114970	coatomer alpha subunit, putative	FALSE
PVP01_1344300	rRNA biogenesis protein RRP5, putative	OG0001993	5	PBANKA_1037600	PF3D7_1404500	PcyM_1351600	PCYB_135200	rRNA biogenesis protein RRP5, putative	TRUE
PVP01_0710100	conserved Plasmodium protein, unknown function	OG0003666	5	PBANKA_0812700	PF3D7_0911600	PcyM_0709900	PCYB_071940	conserved Plasmodium protein, unknown function	FALSE
PVP01_0613100	methyltransferase, putative	OG0001066	5	PBANKA_0512100	PF3D7_1028000	PcyM_0616400	PCYB_062210	methyltransferase, putative	FALSE
PVP01_0605600	rRNA (cytosine-C(5))-methyltransferase, putative	OG0001027	5	PBANKA_0504600	PF3D7_1020400	PcyM_0606600	PCYB_061470	rRNA (cytosine-C(5))-methyltransferase, putative	FALSE
PVP01_0215700	conserved protein, unknown function	OG0000822	5	PBANKA_0214100	PF3D7_0730000	PcyM_0219200	PCYB_022490	conserved protein, unknown function	FALSE
PVP01_0948900	tryptophan-rich protein	NA	NA	NA	NA	NA	NA	NA	FALSE
PVP01_1227700	conserved Apicomplexan protein, unknown function	OG0002741	5	PBANKA_1341900	PF3D7_1326700	PcyM_1231600	PCYB_123590	conserved Apicomplexan protein, unknown function	TRUE
PVP01_0818400	WD repeat-containing protein, putative	OG0002343	5	PBANKA_1216700	PF3D7_0321800	PcyM_0819600	PCYB_082800	WD repeat-containing protein, putative	TRUE
PVP01_0000800	PIR protein	NA	NA	NA	NA	NA	NA	NA	FALSE
PVP01_0513600	2-oxoglutarate dehydrogenase E1 component, mitochondrial precursor, putative	OG0001316	5	PBANKA_0710100	PF3D7_0820700	PcyM_0513300	PCYB_052050	2-oxoglutarate dehydrogenase E1 component	FALSE
PVP01_0211800	aspartate--tRNA ligase, putative	OG0000797	5	PBANKA_0210200	PF3D7_0102900	PcyM_0215200	PCYB_022100	aspartate--tRNA ligase	FALSE
PVP01_0505100	U6 snRNA-associated Sm-like protein LSm8, putative	OG0001259	5	PBANKA_0701400	PF3D7_0829300	PcyM_0503900	PCYB_051200	U6 snRNA-associated Sm-like protein LSm8, putative	FALSE
PVP01_0003310	Plasmodium exported protein, unknown function, pseudogene	NA	NA	NA	NA	NA	NA	NA	FALSE
PVP01_1272700	Plasmodium exported protein, unknown function	NA	NA	NA	NA	NA	NA	NA	FALSE
PVP01_1342400	glycerophosphodiester phosphodiesterase, putative	OG0001983	5	PBANKA_1035900	PF3D7_1406300	PcyM_1349700	PCYB_135010	glycerophosphodiester phosphodiesterase	FALSE
PVP01_0733400	UBX domain-containing protein, putative	OG0001563	5	PBANKA_0835500	PF3D7_0934700	PcyM_0736600	PCYB_074200	UBX domain-containing protein, putative	TRUE
PVP01_0534200	Plasmodium exported protein, unknown function	NA	NA	NA	NA	NA	NA	NA	FALSE
PVP01_1312100	pantothenate kinase 2, putative	OG0001190	5	PBANKA_0611400	PF3D7_1437400	PcyM_1314000	PCYB_132160	pantothenate kinase 2, putative	FALSE
PVP01_1437500	conserved Plasmodium protein, unknown function	OG0004619	5	PBANKA_1434300	PF3D7_1218700	PcyM_1439100	PCYB_144500	conserved Plasmodium protein, unknown function	FALSE
PVP01_1108200	nuclear fusion protein, putative	OG0002217	5	PBANKA_1139800	PF3D7_1363800	PcyM_1107600	PCYB_111680	nuclear fusion protein, putative	TRUE
PVP01_0913900	protein tyrosine phosphatase, putative	OG0001750	5	PBANKA_0934500	PF3D7_1113100	PcyM_0915400	PCYB_091940	protein tyrosine phosphatase	TRUE
PVP01_1207500	conserved Plasmodium protein, unknown function	OG0004984	4	NA	PF3D7_1347300	PcyM_1209100	PCYB_121640	conserved Plasmodium membrane protein, unknown function	FALSE
PVP01_1254600	conserved Plasmodium protein, unknown function	OG0004341	5	PBANKA_1316100	PF3D7_1452400	PcyM_1262800	PCYB_126270	conserved Plasmodium protein, unknown function	FALSE
PVP01_1133900	conserved protein, unknown function	OG0002418	5	PBANKA_1229900	PF3D7_0615200	PcyM_1135500	PCYB_114190	conserved protein, unknown function	FALSE
PVP01_0831200	dual specificity protein phosphatase, putative	OG0000952	5	PBANKA_0407200	PF3D7_0309000	PcyM_0834900	PCYB_084040	dual specificity protein phosphatase	FALSE
PVP01_1149000	PIR protein	NA	NA	NA	NA	NA	NA	NA	FALSE
PVP01_0009250	Plasmodium exported protein, unknown function	NA	NA	NA	NA	NA	NA	NA	FALSE
PVP01_0914800	dynein light chain Tctex-type, putative	OG0001744	5	PBANKA_0933600	PF3D7_1114000	PcyM_0916400	PCYB_092030	dynein light chain Tctex-type, putative	FALSE
PVP01_0928500	TFIIS central domain-containing protein, putative	OG0001658	5	PBANKA_0920600	PF3D7_1127800	PcyM_0932200	PCYB_093390	TFIIS central domain-containing protein, putative	TRUE
PVP01_1404600	tetratricopeptide repeat protein, putative	OG0004522	5	PBANKA_1402200	PF3D7_1303700	PcyM_1405200	PCYB_141320	tetratricopeptide repeat protein, putative	FALSE
PVP01_1132800	conserved Plasmodium protein, unknown function	OG0004062	5	PBANKA_1115800	PF3D7_0616300	PcyM_1134300	PCYB_114080	conserved Plasmodium protein, unknown function	TRUE
PVP01_0624600	PIR protein	NA	NA	NA	NA	NA	NA	NA	FALSE
PVP01_0002060	Plasmodium exported protein, unknown function, pseudogene	NA	NA	NA	NA	NA	NA	NA	FALSE
PVP01_0000020	STP1 protein	NA	NA	NA	NA	NA	NA	NA	FALSE
PVP01_1258500	conserved Plasmodium protein, unknown function	OG0004992	4	NA	PF3D7_1448500	PcyM_1266900	PCYB_126650	conserved Plasmodium protein, unknown function	FALSE
PVP01_0001470	PIR protein	NA	NA	NA	NA	NA	NA	NA	FALSE
PVP01_0924500	13 kDa ribonucleoprotein-associated protein, putative	OG0001684	5	PBANKA_0924400	PF3D7_1123900	PcyM_0927700	PCYB_092990	13 kDa ribonucleoprotein-associated protein, putative	FALSE
PVP01_1450700	CG2-related protein, putative	OG0004660	5	PBANKA_1447200	PF3D7_1232500	PcyM_1455200	PCYB_145810	CG2-related protein, putative	TRUE
PVP01_0722100	lipoate-protein ligase 2, putative	OG0001509	5	PBANKA_0824500	PF3D7_0923600	PcyM_0722500	PCYB_073120	lipoate-protein ligase 2	TRUE
PVP01_0624100	PIR protein	OG0005519	3	NA	NA	PcyM_0629100	PCYB_063300	NA	FALSE
PVP01_1466900	THO complex subunit 2, putative	OG0003216	5	PBANKA_1462700	PF3D7_1249800	PcyM_1473800	PCYB_147420	THO complex subunit 2, putative	TRUE
PVP01_1413700	conserved Plasmodium protein, unknown function	OG0002915	5	PBANKA_1411200	PF3D7_1312800	PcyM_1414500	PCYB_142220	conserved Plasmodium protein, unknown function	TRUE
PVP01_0736400	PIR protein	NA	NA	NA	NA	NA	NA	NA	FALSE
PVP01_1416100	heptatricopeptide repeat-containing protein, putative	OG0002934	5	PBANKA_1413700	PF3D7_1315200	PcyM_1416900	PCYB_142460	heptatricopeptide repeat-containing protein, putative	FALSE
PVP01_0917500	conserved protein, unknown function	OG0001731	5	PBANKA_0931100	PF3D7_1116900	PcyM_0919500	PCYB_092300	conserved protein, unknown function	TRUE
PVP01_0207200	dolichyl-diphosphooligosaccharide--protein glycosyltransferase subunit OST3/OST6, putative	OG0003286	5	PBANKA_0205700	PF3D7_0107700	PcyM_0209400	PCYB_021640	dolichyl-diphosphooligosaccharide--protein glycosyltransferase subunit OST3/OST6, putative	FALSE
PVP01_1341300	conserved Plasmodium protein, unknown function	OG0003998	5	PBANKA_1034800	PF3D7_1407400	PcyM_1348600	PCYB_134900	conserved Plasmodium protein, unknown function	TRUE
PVP01_0008120	PIR protein	NA	NA	NA	NA	NA	NA	NA	FALSE
PVP01_1274100	PIR protein	NA	NA	NA	NA	NA	NA	NA	FALSE
PVP01_1021700	CDK-activating kinase assembly factor MAT1, putative	OG0002064	5	PBANKA_1111900	PF3D7_0512300	PcyM_1020800	PCYB_102940	CDK-activating kinase assembly factor MAT1	TRUE
PVP01_1317000	RNA methyltransferase, putative	OG0001864	5	PBANKA_1012400	PF3D7_1432500	PcyM_1319200	PCYB_132630	RNA methyltransferase, putative	FALSE
PVP01_1129800	F-box protein FBXO1, putative	OG0002100	5	PBANKA_1118900	PF3D7_0619700	PcyM_1130900	PCYB_113780	F-box protein FBXO1, putative	TRUE
PVP01_0527500	protein SOC1, putative	OG0001372	5	PBANKA_0720200	PF3D7_0418100	PcyM_0528100	PCYB_053240	protein SOC1, putative	FALSE
PVP01_0005430	PIR protein	NA	NA	NA	NA	NA	NA	NA	FALSE
PVP01_1228000	translation initiation factor eIF-2B subunit gamma, putative	OG0002740	5	PBANKA_1341600	PF3D7_1326400	PcyM_1232300	PCYB_123620	translation initiation factor eIF-2B subunit gamma, putative	FALSE
PVP01_0002150	PIR protein	NA	NA	NA	NA	NA	NA	NA	FALSE
PVP01_1444400	conserved Plasmodium protein, unknown function	OG0005012	4	NA	PF3D7_1226200	PcyM_1447100	PCYB_145190	conserved Plasmodium protein, unknown function	FALSE
PVP01_1243500	DNA polymerase alpha subunit B, putative	OG0002658	5	PBANKA_1326900	PF3D7_1463300	PcyM_1249500	PCYB_125170	DNA polymerase alpha subunit B, putative	FALSE
PVP01_1118700	TPH domain-containing protein, putative	OG0002163	5	PBANKA_1129600	PF3D7_0630800	PcyM_1119000	PCYB_112720	TPH domain-containing protein, putative	FALSE
PVP01_0719000	conserved Plasmodium protein, unknown function	OG0003696	5	PBANKA_0821500	PF3D7_0920600	PcyM_0719300	PCYB_072810	conserved Plasmodium protein, unknown function	FALSE
PVP01_0412900	GDP-fructose:GMP antiporter, putative	OG0000868	5	PBANKA_0308800	PF3D7_0212000	PcyM_0411000	PCYB_041810	GDP-fructose:GMP antiporter, putative	FALSE
PVP01_0004490	PIR protein	NA	NA	NA	NA	NA	NA	NA	FALSE
PVP01_1417500	choline-phosphate cytidylyltransferase, putative	OG0002942	5	PBANKA_1415100	PF3D7_1316600	PcyM_1418300	PCYB_142590	choline-phosphate cytidylyltransferase	FALSE
PVP01_1035700	Plasmodium exported protein, unknown function, pseudogene	NA	NA	NA	NA	NA	NA	NA	FALSE
PVP01_0315600	conserved Plasmodium protein, unknown function	OG0001224	5	PBANKA_0617400	PF3D7_0719900	PcyM_0320300	PCYB_032400	conserved Plasmodium membrane protein, unknown function	FALSE
PVP01_0501900	Plasmodium exported protein, unknown function	NA	NA	NA	NA	NA	NA	NA	FALSE
PVP01_0009940	Plasmodium exported protein (PHIST), unknown function	NA	NA	NA	NA	NA	NA	NA	FALSE
PVP01_0949800	Plasmodium exported protein, unknown function	NA	NA	NA	NA	NA	NA	NA	FALSE
PVP01_1456800	BTB/POZ domain-containing protein, putative	OG0000642	5	PBANKA_1453200	PF3D7_1238700	PcyM_1462900	PCYB_146440	BTB/POZ domain-containing protein, putative	FALSE
PVP01_0505000	prolyl 4-hydroxylase subunit alpha, putative	OG0000293	5	PBANKA_0701300	PF3D7_0829400	PcyM_0503800	PCYB_051190	prolyl 4-hydroxylase subunit alpha, putative	FALSE
PVP01_0007790	PIR protein	NA	NA	NA	NA	NA	NA	NA	FALSE
PVP01_0000150	tryptophan-rich protein	NA	NA	NA	NA	NA	NA	NA	FALSE
PVP01_0213400	conserved Plasmodium protein, unknown function	OG0003303	5	PBANKA_0211800	PF3D7_0727700	PcyM_0216900	PCYB_022260	conserved Plasmodium protein, unknown function	FALSE
PVP01_1124300	conserved Plasmodium protein, unknown function	OG0004091	5	PBANKA_1124100	PF3D7_0625200	PcyM_1125000	PCYB_113280	conserved Plasmodium protein, unknown function	TRUE
PVP01_1232300	BRCT domain-containing protein, putative	OG0002718	5	PBANKA_1337600	PF3D7_1322300	PcyM_1237100	PCYB_124050	BRCT domain-containing protein, putative	TRUE
PVP01_0809600	protein phosphatase PPM10, putative	OG0000532	5	PBANKA_1207900	PF3D7_1009600	PcyM_0809600	PCYB_081920	protein phosphatase PPM10, putative	FALSE
PVP01_0000210	tryptophan-rich protein	OG0004779	4	PBANKA_0623300	NA	PcyM_0012600	PCYB_001530	NA	FALSE
PVP01_1148400	PIR protein	NA	NA	NA	NA	NA	NA	NA	FALSE
PVP01_1137200	lsm12, putative	OG0000736	5	PBANKA_0110200	PF3D7_0611900	PcyM_1139300	PCYB_114500	lsm12, putative	FALSE
PVP01_0734300	conserved Plasmodium protein, unknown function	OG0005211	3	NA	NA	PcyM_0737700	PCYB_074280	NA	TRUE
PVP01_0009990	PIR protein	NA	NA	NA	NA	NA	NA	NA	FALSE
PVP01_0005860	PIR protein	NA	NA	NA	NA	NA	NA	NA	FALSE
PVP01_0711700	conserved protein, unknown function	OG0001455	5	PBANKA_0814300	PF3D7_0913300	PcyM_0711500	PCYB_072100	conserved protein, unknown function	FALSE
PVP01_1316600	SF-assemblin, putative	OG0001860	5	PBANKA_1012000	PF3D7_1432900	PcyM_1318800	PCYB_132590	SF-assemblin, putative	FALSE
PVP01_1209600	rhomboid protease ROM6, putative	OG0002824	5	PBANKA_1358100	PF3D7_1345200	PcyM_1211200	PCYB_121850	rhomboid protease ROM6, putative	FALSE
PVP01_0704400	endonuclease/exonuclease/phosphatase domain containing protein	OG0004853	3	NA	NA	PcyM_0703800	PCYB_071380	NA	FALSE
PVP01_0909600	conserved Plasmodium protein, unknown function	OG0003864	5	PBANKA_0938200	PF3D7_1108800	PcyM_0910800	PCYB_091570	conserved Plasmodium protein, unknown function	FALSE
PVP01_0000200	tryptophan-rich protein	OG0005135	3	NA	NA	PcyM_0012700	PCYB_002960	NA	FALSE
PVP01_1115800	conserved Plasmodium protein, unknown function	OG0004116	5	PBANKA_1132400	PF3D7_1356100	PcyM_1115600	PCYB_112440	conserved Plasmodium protein, unknown function	FALSE
PVP01_0906600	conserved Apicomplexan protein, unknown function	OG0001791	5	PBANKA_0941100	PF3D7_1105800	PcyM_0907600	PCYB_091280	conserved Apicomplexan protein, unknown function	TRUE
PVP01_1213300	inner membrane complex suture component, putative	OG0002803	5	PBANKA_1354600	PF3D7_1341500	PcyM_1215300	PCYB_122210	inner membrane complex suture component, putative	FALSE
PVP01_0000770	PIR protein	NA	NA	NA	NA	NA	NA	NA	FALSE
PVP01_0940500	conserved Plasmodium protein, unknown function	OG0003779	5	PBANKA_0909200	PF3D7_1139800	PcyM_0944600	PCYB_094540	conserved Plasmodium protein, unknown function	FALSE
PVP01_0320200	conserved Plasmodium protein, unknown function	OG0003552	5	PBANKA_0622000	PF3D7_0724500	PcyM_0325100	PCYB_032830	conserved Plasmodium protein, unknown function	TRUE
PVP01_0836800	palmitoyltransferase DHHC1, putative	OG0000916	5	PBANKA_0402000	PF3D7_0303400	PcyM_0840900	PCYB_084580	palmitoyltransferase DHHC1	FALSE
PVP01_0815400	methionine aminopeptidase 1b, putative	OG0002330	5	PBANKA_1213700	PF3D7_1015300	PcyM_0816000	PCYB_082510	methionine aminopeptidase 1b, putative	FALSE
PVP01_0810000	heptatricopeptide repeat-containing protein, putative	OG0004177	5	PBANKA_1208300	PF3D7_1009900	PcyM_0810100	PCYB_081970	heptatricopeptide repeat-containing protein, putative	FALSE
PVP01_0706400	peptide deformylase, putative	OG0001425	5	PBANKA_0809300	PF3D7_0907900	PcyM_0705800	PCYB_071570	peptide deformylase	FALSE
PVP01_0531200	eukaryotic initiation factor 4A-III, putative	OG0001125	5	PBANKA_0523100	PF3D7_0422700	PcyM_0532450	PCYB_053610	eukaryotic initiation factor 4A-III, putative	FALSE
PVP01_0000370	PIR protein	NA	NA	NA	NA	NA	NA	NA	FALSE
PVP01_1219500	MSP7-like protein	NA	NA	NA	NA	NA	NA	NA	FALSE
PVP01_0008830	PIR protein	NA	NA	NA	NA	NA	NA	NA	FALSE
PVP01_0513700	conserved protein, unknown function	OG0001317	5	PBANKA_0710200	PF3D7_0820600	PcyM_0513500	PCYB_052060	conserved protein, unknown function	FALSE
PVP01_0005360	Plasmodium exported protein, unknown function	NA	NA	NA	NA	NA	NA	NA	FALSE
PVP01_0937000	conserved Plasmodium protein, unknown function	OG0003791	5	PBANKA_0912500	PF3D7_1136100	PcyM_0941000	PCYB_094200	conserved Plasmodium protein, unknown function	FALSE
PVP01_0831900	conserved Plasmodium protein, unknown function	OG0003377	5	PBANKA_0406600	PF3D7_0308300	PcyM_0835700	PCYB_084100	conserved Plasmodium protein, unknown function	FALSE
PVP01_0009170	PIR protein, pseudogene	NA	NA	NA	NA	NA	NA	NA	FALSE
PVP01_0808100	26S protease regulatory subunit 4, putative	OG0002291	5	PBANKA_1206600	PF3D7_1008400	PcyM_0808000	PCYB_081770	26S protease regulatory subunit 4, putative	FALSE
PVP01_0707500	conserved Plasmodium protein, unknown function	OG0000431	5	PBANKA_0810200	PF3D7_0909000	PcyM_0707200	PCYB_071680	conserved Plasmodium protein, unknown function	FALSE
PVP01_0204500	phosphatidylinositol-4-phosphate 5-kinase, putative	OG0000359	5	PBANKA_0203100	PF3D7_0110600	PcyM_0206100	PCYB_021380	phosphatidylinositol-4-phosphate 5-kinase	TRUE
PVP01_1414600	Maf-like protein, putative	OG0002922	5	PBANKA_1412100	PF3D7_1313700	PcyM_1415400	PCYB_142310	Maf-like protein, putative	FALSE
PVP01_0613300	RING zinc finger protein, putative	OG0000395	5	PBANKA_0512300	PF3D7_1028200	PcyM_0616600	PCYB_062230	RING zinc finger protein, putative	FALSE
PVP01_1423000	conserved Plasmodium protein, unknown function	OG0004575	5	PBANKA_1420500	PF3D7_0713900	PcyM_1424000	PCYB_143130	conserved Plasmodium protein, unknown function	FALSE
PVP01_1035600	Plasmodium exported protein, unknown function	NA	NA	NA	NA	NA	NA	NA	FALSE
PVP01_0906900	ribosomal protein S15, apicoplast, putative	OG0001789	5	PBANKA_0940800	PF3D7_1106100	PcyM_0907900	PCYB_091310	ribosomal protein S15, apicoplast, putative	FALSE
PVP01_0006460	PIR protein	NA	NA	NA	NA	NA	NA	NA	FALSE
PVP01_1146900	zinc finger protein, putative	OG0000675	5	PBANKA_0100800	PF3D7_0602000	PcyM_1150200	PCYB_115440	zinc finger protein, putative	FALSE
PVP01_1417800	conserved protein, unknown function	OG0002945	5	PBANKA_1415400	PF3D7_1316900	PcyM_1418600	PCYB_142620	conserved protein, unknown function	FALSE
PVP01_0318000	ubiquitin C-terminal hydrolase, putative	OG0001238	5	PBANKA_0619800	PF3D7_0722300	PcyM_0322600	PCYB_032610	ubiquitin carboxyl-terminal hydrolase, putative	FALSE
PVP01_0006920	Plasmodium exported protein, unknown function	NA	NA	NA	NA	NA	NA	NA	FALSE
PVP01_1109100	conserved Plasmodium protein, unknown function	OG0004134	5	PBANKA_1138900	PF3D7_1362900	PcyM_1108500	PCYB_111770	conserved Plasmodium protein, unknown function	FALSE
PVP01_0606500	apicoplast integral membrane protein, putative	OG0003427	5	PBANKA_0505500	PF3D7_1021300	PcyM_0608100	PCYB_061560	apicoplast integral membrane protein, putative	FALSE
PVP01_0007610	PIR protein	NA	NA	NA	NA	NA	NA	NA	FALSE
PVP01_0512800	ribosomal RNA small subunit methyltransferase NEP1, putative	OG0001313	5	PBANKA_0709300	PF3D7_0821500	PcyM_0512300	PCYB_051970	ribosomal RNA small subunit methyltransferase NEP1, putative	FALSE
PVP01_0944500	oocyst capsule protein Cap93, putative	OG0001586	5	PBANKA_0905200	PF3D7_1143800	PcyM_0948600	PCYB_094940	oocyst capsule protein Cap93, putative	FALSE
PVP01_0610100	conserved Plasmodium protein, unknown function	OG0001050	5	PBANKA_0509100	PF3D7_1024900	PcyM_0612400	PCYB_061920	conserved Plasmodium protein, unknown function	FALSE
PVP01_0804000	E3 ubiquitin-protein ligase, putative	OG0002265	5	PBANKA_1202600	PF3D7_1004300	PcyM_0803600	PCYB_081360	E3 ubiquitin-protein ligase, putative	TRUE
PVP01_0714300	conserved Plasmodium protein, unknown function	OG0003681	5	PBANKA_0816900	PF3D7_0915900	PcyM_0714100	PCYB_072350	conserved Plasmodium protein, unknown function	TRUE
PVP01_0316100	apoptosis-inducing factor, putative	OG0000411	5	PBANKA_0617900	PF3D7_0720400	PcyM_0320700	PCYB_032450	apoptosis-inducing factor, putative	TRUE
PVP01_0000990	PIR protein	NA	NA	NA	NA	NA	NA	NA	FALSE
PVP01_0313700	thioredoxin-like protein	OG0001210	5	PBANKA_0615600	PF3D7_0717900	PcyM_0317200	PCYB_032160	thioredoxin-like protein	FALSE
PVP01_1252800	conserved Plasmodium protein, unknown function	OG0004349	5	PBANKA_1317900	PF3D7_1454200	PcyM_1260900	PCYB_126110	conserved Plasmodium protein, unknown function	FALSE
PVP01_1142000	translation initiation factor IF-2, putative	OG0000706	5	PBANKA_0105600	PF3D7_0607000	PcyM_1145200	PCYB_114950	translation initiation factor IF-2, putative	FALSE
PVP01_1002500	conserved Plasmodium protein, unknown function	OG0004290	5	PBANKA_1245700	PF3D7_0531300	PcyM_1000200	PCYB_101060	conserved Plasmodium protein, unknown function	FALSE
PVP01_0604900	conserved Plasmodium protein, unknown function	OG0003423	5	PBANKA_0503900	PF3D7_1019700	PcyM_0605700	PCYB_061400	conserved Plasmodium protein, unknown function	FALSE
PVP01_0000280	PIR protein	NA	NA	NA	NA	NA	NA	NA	FALSE
PVP01_1202700	ABC transporter B family member 6, putative	OG0000603	5	PBANKA_1364800	PF3D7_1352100	PcyM_1203900	PCYB_121170	ABC transporter B family member 6, putative	FALSE
PVP01_1035200	PIR protein	NA	NA	NA	NA	NA	NA	NA	FALSE
PVP01_0008080	Plasmodium exported protein, unknown function	NA	NA	NA	NA	NA	NA	NA	FALSE
PVP01_0620200	conserved Plasmodium protein, unknown function	OG0005079	3	NA	NA	PcyM_0625100	PCYB_062940	NA	FALSE
PVP01_1406700	conserved Plasmodium protein, unknown function	OG0004526	5	PBANKA_1404300	PF3D7_1305800	PcyM_1407300	PCYB_141530	conserved Plasmodium protein, unknown function	FALSE
PVP01_0819000	UDP-N-acetylglucosamine--dolichyl-phosphate N-acetylglucosaminephosphotransferase, putative	OG0002345	5	PBANKA_1217300	PF3D7_0321200	PcyM_0820500	PCYB_082860	UDP-N-acetylglucosamine--dolichyl-phosphate N-acetylglucosaminephosphotransferase, putative	FALSE
PVP01_0414300	protein CERLI1, putative	OG0000374	5	PBANKA_0307500	PF3D7_0210600	PcyM_0412600	PCYB_041940	protein CERLI1	FALSE
PVP01_1402400	reticulocyte binding protein 2a	NA	NA	NA	NA	NA	NA	NA	FALSE
PVP01_1018400	gametogenesis essential protein 1, putative	OG0004060	5	PBANKA_1115100	PF3D7_0515500	PcyM_1017100	PCYB_102620	gametogenesis essential protein 1, putative	FALSE
PVP01_1144400	GYF domain-containing protein, putative	OG0000690	5	PBANKA_0103300	PF3D7_0604500	PcyM_1147500	PCYB_115190	GYF domain-containing protein, putative	TRUE
PVP01_0916600	rhoptry neck protein 4	OG0003846	5	PBANKA_0932000	PF3D7_1116000	PcyM_0918500	PCYB_092210	rhoptry neck protein 4	FALSE
PVP01_1445400	potassium channel K1, putative	OG0003104	5	PBANKA_1442000	PF3D7_1227200	PcyM_1448500	PCYB_145290	potassium channel K1	FALSE
PVP01_0714000	conserved Plasmodium protein, unknown function	OG0003680	5	PBANKA_0816600	PF3D7_0915600	PcyM_0713800	PCYB_072320	conserved Plasmodium protein, unknown function	FALSE
PVP01_0608600	HORMA domain protein, putative	OG0003434	5	PBANKA_0507600	PF3D7_1023400	PcyM_0610700	PCYB_061770	HORMA domain protein, putative	FALSE
PVP01_1144100	RAP protein, putative	OG0000692	5	PBANKA_0103500	PF3D7_0604800	PcyM_1147200	PCYB_115160	RAP protein, putative	FALSE
PVP01_0730100	PUB domain-containing protein, putative	OG0001548	5	PBANKA_0832200	PF3D7_0931400	PcyM_0732500	PCYB_073890	PUB domain-containing protein, putative	FALSE
PVP01_0504300	conserved Plasmodium protein, unknown function	OG0003556	5	PBANKA_0701100	PF3D7_0830400	PcyM_0502800	PCYB_051150	CRA domain-containing protein, putative	FALSE
PVP01_1148700	PIR protein	NA	NA	NA	NA	NA	NA	NA	FALSE
PVP01_0941200	myosin K, putative	OG0001600	5	PBANKA_0908500	PF3D7_1140500	PcyM_0945200	PCYB_094600	myosin K, putative	FALSE
PVP01_0942200	conserved Plasmodium protein, unknown function	OG0003771	5	PBANKA_0907500	PF3D7_1141500	PcyM_0946200	PCYB_094700	conserved Plasmodium protein, unknown function	FALSE
PVP01_0905700	calcium/calmodulin-dependent protein kinase, putative	OG0001794	5	PBANKA_0942000	PF3D7_1104900	PcyM_0906700	PCYB_091190	calcium/calmodulin-dependent protein kinase, putative	TRUE
PVP01_1248000	golgi apparatus membrane protein TVP23, putative	OG0002631	5	PBANKA_1322600	PF3D7_1458900	PcyM_1254500	PCYB_125620	golgi apparatus membrane protein TVP23, putative	FALSE
PVP01_1409600	conserved Plasmodium protein, unknown function	OG0004539	5	PBANKA_1407100	PF3D7_1308600	PcyM_1410200	PCYB_141810	conserved Plasmodium protein, unknown function	FALSE
PVP01_1263700	U6 snRNA-associated Sm-like protein LSm5, putative	OG0002548	5	PBANKA_1307200	PF3D7_1443300	PcyM_1272500	PCYB_127180	U6 snRNA-associated Sm-like protein LSm5, putative	FALSE
PVP01_1005300	F-actin-capping protein subunit alpha, putative	OG0004281	5	PBANKA_1243100	PF3D7_0528500	PcyM_1003000	PCYB_101320	F-actin-capping protein subunit alpha, putative	FALSE
PVP01_1445500	conserved Plasmodium protein, unknown function	OG0004642	5	PBANKA_1442100	PF3D7_1227300	PcyM_1448600	PCYB_145300	conserved Plasmodium protein, unknown function	FALSE
PVP01_0108900	inner membrane complex protein 1d, putative	OG0004217	5	PBANKA_1219100	PF3D7_0708600	PcyM_0109700	PCYB_011570	inner membrane complex protein 1d, putative	FALSE
PVP01_1426700	translation initiation factor SUI1, putative	OG0002998	5	PBANKA_1423900	PF3D7_0813600	PcyM_1427900	PCYB_143460	translation initiation factor SUI1, putative	FALSE
PVP01_1447600	T-complex protein 1 subunit gamma, putative	OG0003116	5	PBANKA_1444100	PF3D7_1229500	PcyM_1451500	PCYB_145510	T-complex protein 1 subunit gamma	FALSE
PVP01_1220600	conserved protein, unknown function	OG0002773	5	PBANKA_1348800	PF3D7_1334100	PcyM_1223400	PCYB_122870	conserved protein, unknown function	FALSE
PVP01_0311200	conserved Plasmodium protein, unknown function	OG0004776	4	PBANKA_0613100	NA	PcyM_0314400	PCYB_031920	NA	FALSE
PVP01_0932400	kelch domain-containing protein, putative	OG0004974	4	NA	PF3D7_1131600	PcyM_0936300	PCYB_093760	kelch domain-containing protein, putative	FALSE
PVP01_1442500	polyadenylate-binding protein 1, putative	OG0003087	5	PBANKA_1439200	PF3D7_1224300	PcyM_1444700	PCYB_145000	polyadenylate-binding protein 1, putative	TRUE
PVP01_1026000	6-cysteine protein	OG0004034	5	PBANKA_1107600	PF3D7_0508000	PcyM_1025900	PCYB_103360	6-cysteine protein	TRUE
PVP01_0307400	conserved Plasmodium protein, unknown function	OG0003905	5	PBANKA_1005700	PF3D7_0408100	PcyM_0310500	PCYB_031580	conserved Plasmodium protein, unknown function	TRUE
PVP01_1010100	divalent metal transporter, putative	OG0002473	5	PBANKA_1238600	PF3D7_0523800	PcyM_1008000	PCYB_101790	divalent metal transporter, putative	FALSE
PVP01_0534600	PIR protein	NA	NA	NA	NA	NA	NA	NA	FALSE
PVP01_0011080	PIR protein	NA	NA	NA	NA	NA	NA	NA	FALSE
PVP01_0006360	PIR protein, pseudogene	NA	NA	NA	NA	NA	NA	NA	FALSE
PVP01_1223800	GPI transamidase subunit PIG-U, putative	OG0002755	5	PBANKA_1345700	PF3D7_1330700	PcyM_1226700	PCYB_123180	GPI transamidase subunit PIG-U, putative	FALSE
PVP01_0824700	conserved Plasmodium protein, unknown function	OG0003397	5	PBANKA_0413200	PF3D7_0315400	PcyM_0826700	PCYB_083430	conserved Plasmodium protein, unknown function	FALSE
PVP01_0418000	serine-repeat antigen (SERA)	OG0003324	5	PBANKA_0304700	PF3D7_0207300	PcyM_0417500	PCYB_042310	serine repeat antigen 8	TRUE
PVP01_0522500	RNA-binding protein, putative	OG0003599	5	PBANKA_0717900	PF3D7_0416000	PcyM_0524200	PCYB_052910	RNA-binding protein, putative	TRUE
PVP01_0212400	conserved Plasmodium protein, unknown function	OG0003301	5	PBANKA_0210800	PF3D7_0726700	PcyM_0215800	PCYB_022160	conserved Plasmodium protein, unknown function	FALSE
PVP01_1255400	LCCL domain-containing protein, putative	OG0002597	5	PBANKA_1315300	PF3D7_1451600	PcyM_1263700	PCYB_126350	LCCL domain-containing protein	FALSE
PVP01_0723000	conserved Plasmodium protein, unknown function	OG0001515	5	PBANKA_0825400	PF3D7_0924500	PcyM_0723700	PCYB_073210	conserved Plasmodium membrane protein, unknown function	FALSE
PVP01_0010640	PIR protein	NA	NA	NA	NA	NA	NA	NA	FALSE
PVP01_1111600	conserved Plasmodium protein, unknown function	OG0004126	5	PBANKA_1136500	PF3D7_1360300	PcyM_1111300	PCYB_112030	conserved Plasmodium protein, unknown function	FALSE
PVP01_1025000	alpha-soluble NSF attachment protein, putative	OG0002049	5	PBANKA_1108600	PF3D7_0509000	PcyM_1024700	PCYB_103260	alpha-soluble NSF attachment protein, putative	TRUE
PVP01_1448800	sun-family protein, putative	OG0003122	5	PBANKA_1445300	PF3D7_1230600	PcyM_1453000	PCYB_145620	sun-family protein, putative	FALSE
PVP01_1034500	PIR protein	NA	NA	NA	NA	NA	NA	NA	FALSE
PVP01_0931800	RNA-binding protein s1, putative	OG0001640	5	PBANKA_0917200	PF3D7_1131000	PcyM_0935700	PCYB_093700	RNA-binding protein s1, putative	FALSE
PVP01_1450800	conserved Plasmodium protein, unknown function	OG0004661	5	PBANKA_1447300	PF3D7_1232600	PcyM_1455300	PCYB_145820	conserved Plasmodium protein, unknown function	TRUE
PVP01_1233900	dihydroorotase, putative	OG0002707	5	PBANKA_1336100	PF3D7_1472900	PcyM_1238900	PCYB_124210	dihydroorotase, putative	FALSE
PVP01_0508100	alpha/beta hydrolase, putative	NA	NA	NA	NA	NA	NA	NA	TRUE
PVP01_0001110	PIR protein	NA	NA	NA	NA	NA	NA	NA	FALSE
PVP01_0003440	PIR protein	NA	NA	NA	NA	NA	NA	NA	FALSE
PVP01_0520500	structural maintenance of chromosomes protein 3, putative	OG0001349	5	PBANKA_0716000	PF3D7_0414000	PcyM_0522000	PCYB_052710	structural maintenance of chromosomes protein 3	TRUE
PVP01_1242400	zinc finger protein, putative	OG0002662	5	PBANKA_1327800	PF3D7_1464400	PcyM_1248400	PCYB_125060	zinc finger protein, putative	FALSE
PVP01_1332000	prefoldin subunit 2, putative	OG0001929	5	PBANKA_1025800	PF3D7_1416900	PcyM_1337400	PCYB_133980	prefoldin subunit 2, putative	FALSE
PVP01_0000870	PIR protein	NA	NA	NA	NA	NA	NA	NA	FALSE
PVP01_0527400	conserved Plasmodium protein, unknown function	OG0003608	5	PBANKA_0720100	PF3D7_0418000	PcyM_0527800	PCYB_053230	conserved Plasmodium protein, unknown function	FALSE
PVP01_0417000	serine-repeat antigen 3 (SERA)	NA	NA	NA	NA	NA	NA	NA	FALSE
PVP01_0515700	Plasmodium exported protein (PHIST), unknown function	OG0005314	3	NA	NA	PcyM_0515700	PCYB_052250	NA	FALSE
PVP01_0828500	plasmepsin VI, putative	OG0000966	5	PBANKA_0409700	PF3D7_0311700	PcyM_0831100	PCYB_083780	plasmepsin VI	FALSE
PVP01_0007190	Plasmodium exported protein, unknown function	NA	NA	NA	NA	NA	NA	NA	FALSE
PVP01_0004930	PIR protein, pseudogene	NA	NA	NA	NA	NA	NA	NA	FALSE
PVP01_0900850	PIR protein, pseudogene	NA	NA	NA	NA	NA	NA	NA	FALSE
PVP01_1106000	conserved Plasmodium protein, unknown function	OG0004142	5	PBANKA_1141800	PF3D7_1366000	PcyM_1105300	PCYB_111460	conserved Plasmodium protein, unknown function	FALSE
PVP01_0948000	conserved Plasmodium protein, unknown function	OG0003751	4	PBANKA_0901700	PF3D7_1147400	PcyM_0952600	NA	conserved Plasmodium protein, unknown function	FALSE
PVP01_1301200	conserved protein, unknown function	OG0001133	5	PBANKA_0600900	PF3D7_1201900	PcyM_1301700	PCYB_131070	conserved protein, unknown function	FALSE
PVP01_0004840	PIR protein	NA	NA	NA	NA	NA	NA	NA	FALSE
PVP01_1127200	vacuolar transporter chaperone, putative	OG0002113	5	PBANKA_1121200	PF3D7_0622300	PcyM_1128200	PCYB_113550	vacuolar transporter chaperone, putative	FALSE
PVP01_1454400	conserved protein, unknown function	OG0003149	5	PBANKA_1450900	PF3D7_1236300	PcyM_1460300	PCYB_146200	conserved protein, unknown function	TRUE
PVP01_1011000	zinc finger protein, putative	OG0004262	5	PBANKA_1237600	PF3D7_0522900	PcyM_1008900	PCYB_101880	zinc finger protein, putative	TRUE
PVP01_1222800	60S ribosomal protein L23, putative	OG0002761	5	PBANKA_1346700	PF3D7_1331800	PcyM_1225700	PCYB_123080	60S ribosomal protein L23, putative	FALSE
PVP01_0817100	conserved Plasmodium protein, unknown function	OG0002337	5	PBANKA_1215400	PF3D7_0323100	PcyM_0818100	PCYB_082670	conserved Plasmodium protein, unknown function	FALSE
PVP01_0604000	conserved protein, unknown function	OG0003420	5	PBANKA_0503000	PF3D7_1018800	PcyM_0604200	PCYB_061310	conserved protein, unknown function	FALSE
PVP01_0122100	PIR protein	NA	NA	NA	NA	NA	NA	NA	FALSE
PVP01_0002730	PIR protein, pseudogene	NA	NA	NA	NA	NA	NA	NA	FALSE
PVP01_0210800	parasite-infected erythrocyte surface protein, putative	OG0000793	5	PBANKA_0209200	PF3D7_0103900	PcyM_0214000	PCYB_022000	parasite-infected erythrocyte surface protein	FALSE
PVP01_1320800	peptide chain release factor 1, putative	OG0001887	5	PBANKA_1016100	PF3D7_1428600	PcyM_1324000	PCYB_133010	peptide chain release factor 1	TRUE
PVP01_0120500	VIR protein	NA	NA	NA	NA	NA	NA	NA	FALSE
PVP01_1251700	methyltransferase, putative	OG0002613	5	PBANKA_1318900	PF3D7_1455200	PcyM_1259700	PCYB_126000	methyltransferase, putative	TRUE
PVP01_0011140	PIR protein	NA	NA	NA	NA	NA	NA	NA	FALSE
PVP01_1437600	secreted ookinete protein, putative	OG0003059	5	PBANKA_1434400	PF3D7_1218800	PcyM_1439200	PCYB_144510	secreted ookinete protein, putative	FALSE
PVP01_1254400	conserved Plasmodium protein, unknown function	OG0002603	5	PBANKA_1316300	PF3D7_1452600	PcyM_1262600	PCYB_126250	conserved Plasmodium protein, unknown function	FALSE
PVP01_0216100	IMP1-like protein, putative	OG0000825	5	PBANKA_0214500	PF3D7_0730400	PcyM_0219600	PCYB_022530	IMP1-like protein, putative	FALSE
PVP01_1142500	conserved Plasmodium protein, unknown function	OG0003258	5	PBANKA_0105100	PF3D7_0606400	PcyM_1145700	PCYB_115000	conserved Plasmodium protein, unknown function	FALSE
PVP01_0818500	conserved Plasmodium protein, unknown function	OG0004208	5	PBANKA_1216800	PF3D7_0321700	PcyM_0819700	PCYB_082810	conserved Plasmodium protein, unknown function	TRUE
PVP01_1026500	subtilisin-like protease 1	OG0002041	5	PBANKA_1107100	PF3D7_0507500	PcyM_1026500	PCYB_103410	subtilisin-like protease 1	FALSE
PVP01_1000200	PIR protein	NA	NA	NA	NA	NA	NA	NA	FALSE
PVP01_1300400	PIR protein	NA	NA	NA	NA	NA	NA	NA	FALSE
PVP01_0003430	PIR protein	NA	NA	NA	NA	NA	NA	NA	FALSE
PVP01_0001140	PIR protein	NA	NA	NA	NA	NA	NA	NA	FALSE
PVP01_1230100	DEAD box helicase, putative	OG0002733	5	PBANKA_1339700	PF3D7_1324500	PcyM_1234500	PCYB_123830	DEAD box helicase, putative	FALSE
PVP01_0006040	PIR protein	NA	NA	NA	NA	NA	NA	NA	FALSE
PVP01_0103700	erythrocyte membrane-associated antigen, putative	OG0001386	5	PBANKA_0801200	PF3D7_0703500	PcyM_0103800	PCYB_011090	erythrocyte membrane-associated antigen	FALSE
PVP01_0007340	PIR protein, pseudogene	NA	NA	NA	NA	NA	NA	NA	FALSE
PVP01_1309000	ABC transporter B family member 7, putative	OG0001174	5	PBANKA_0608300	PF3D7_1209900	PcyM_1310500	PCYB_131850	ABC transporter B family member 7, putative	FALSE
PVP01_1415800	TFIIH basal transcription factor subunit, putative	OG0002932	5	PBANKA_1413400	PF3D7_1314900	PcyM_1416600	PCYB_142430	general transcription factor IIH subunit 2	TRUE
PVP01_0925100	pyruvate dehydrogenase E1 component subunit alpha, putative	OG0001678	5	PBANKA_0923800	PF3D7_1124500	PcyM_0928400	PCYB_093050	pyruvate dehydrogenase E1 component subunit alpha	FALSE
PVP01_0008340	PIR protein, pseudogene	NA	NA	NA	NA	NA	NA	NA	FALSE
PVP01_0725800	fumarate hydratase, putative	OG0001530	5	PBANKA_0828100	PF3D7_0927300	PcyM_0727300	PCYB_073490	fumarate hydratase	TRUE
PVP01_0009280	STP1 protein	NA	NA	NA	NA	NA	NA	NA	FALSE
PVP01_0007480	Plasmodium exported protein, unknown function	NA	NA	NA	NA	NA	NA	NA	FALSE
PVP01_1271100	erythrocyte membrane protein 3, putative	OG0005119	3	NA	NA	PcyM_1280600	PCYB_127900	NA	FALSE
PVP01_0949900	PIR protein, pseudogene	NA	NA	NA	NA	NA	NA	NA	FALSE
PVP01_1100800	PIR protein	NA	NA	NA	NA	NA	NA	NA	FALSE
PVP01_0400400	PIR protein	NA	NA	NA	NA	NA	NA	NA	FALSE
PVP01_1308600	cGMP-specific 3',5'-cyclic phosphodiesterase alpha, putative	OG0001171	5	PBANKA_0607900	PF3D7_1209500	PcyM_1310100	PCYB_131810	cGMP-specific 3',5'-cyclic phosphodiesterase alpha	TRUE
PVP01_0503500	lysophospholipase, putative	NA	NA	NA	NA	NA	NA	NA	FALSE
PVP01_1402100	Plasmodium exported protein, unknown function	NA	NA	NA	NA	NA	NA	NA	FALSE
PVP01_1202900	conserved protein, unknown function	OG0002854	5	PBANKA_1364600	PF3D7_1351900	PcyM_1204200	PCYB_121190	conserved protein, unknown function	TRUE
PVP01_0010340	PIR protein	NA	NA	NA	NA	NA	NA	NA	FALSE
PVP01_0103900	conserved protein, unknown function	OG0003622	5	PBANKA_0801400	PF3D7_0703700	PcyM_0104000	PCYB_011110	conserved protein, unknown function	FALSE
PVP01_0003910	PIR protein	NA	NA	NA	NA	NA	NA	NA	FALSE
PVP01_0700600	PIR protein	OG0005544	3	NA	NA	PcyM_1286900	PCYB_002020	NA	FALSE
PVP01_0005770	PIR protein	NA	NA	NA	NA	NA	NA	NA	FALSE
PVP01_0006670	PIR protein	NA	NA	NA	NA	NA	NA	NA	FALSE
PVP01_1426400	40S ribosomal protein S16, putative	OG0002996	5	PBANKA_1423600	PF3D7_0813900	PcyM_1427600	PCYB_143430	40S ribosomal protein S16, putative	TRUE
PVP01_0100300	VIR protein	NA	NA	NA	NA	NA	NA	NA	FALSE
PVP01_0317300	40S ribosomal protein S5, putative	OG0001235	5	PBANKA_0619100	PF3D7_0721600	PcyM_0321900	PCYB_032550	40S ribosomal protein S5, putative	FALSE
PVP01_1256100	acetyl-CoA acetyltransferase, putative	OG0000565	5	PBANKA_1314600	PF3D7_1450900	PcyM_1264400	PCYB_126420	acetyl-CoA acetyltransferase, putative	FALSE
PVP01_0823000	6-cysteine protein	OG0003652	5	PBANKA_0808100	PF3D7_0317100	PcyM_0824800	PCYB_083260	6-cysteine protein	TRUE
PVP01_1405100	CorA-like Mg2 transporter protein, putative	OG0000605	5	PBANKA_1402700	PF3D7_1304200	PcyM_1405700	PCYB_141370	CorA-like Mg2 transporter protein, putative	FALSE
PVP01_1263900	conserved Plasmodium protein, unknown function	OG0004317	5	PBANKA_1307000	PF3D7_1443100	PcyM_1272700	PCYB_127200	conserved Plasmodium protein, unknown function	TRUE
PVP01_0110100	prodrug activation and resistance esterase, putative	NA	NA	NA	NA	NA	NA	NA	FALSE
PVP01_0007700	Plasmodium exported protein, unknown function	NA	NA	NA	NA	NA	NA	NA	FALSE
PVP01_1465100	tRNA-splicing endonuclease, putative	OG0004701	5	PBANKA_1460900	PF3D7_1248000	PcyM_1471600	PCYB_147240	tRNA-splicing endonuclease, putative	FALSE
PVP01_0932900	RNA-binding protein, putative	OG0001637	5	PBANKA_0916300	PF3D7_1132100	PcyM_0937000	PCYB_093810	RNA-binding protein, putative	FALSE
PVP01_0118000	1-cys peroxiredoxin	OG0002405	5	PBANKA_1228000	PF3D7_0802200	PcyM_0120400	PCYB_012480	1-cys peroxiredoxin	TRUE
PVP01_1462900	ankyrin-repeat protein, putative	OG0004698	5	PBANKA_1459000	PF3D7_1245900	PcyM_1469200	PCYB_147030	ankyrin-repeat protein, putative	TRUE
PVP01_0707600	conserved Plasmodium protein, unknown function	OG0003659	5	PBANKA_0810300	PF3D7_0909100	PcyM_0707300	PCYB_071690	conserved Plasmodium membrane protein, unknown function	FALSE
PVP01_0620900	conserved Plasmodium protein, unknown function	OG0005082	3	NA	NA	PcyM_0625800	PCYB_063010	NA	FALSE
PVP01_1326800	conserved Plasmodium protein, unknown function	OG0001908	5	PBANKA_1021200	PF3D7_1422200	PcyM_1331600	PCYB_133510	conserved Plasmodium protein, unknown function	FALSE
PVP01_1203100	inner membrane complex protein 1f, putative	OG0002852	5	PBANKA_1364400	PF3D7_1351700	PcyM_1204400	PCYB_121210	inner membrane complex protein 1f, putative	FALSE
PVP01_1113600	rhomboid protease ROM7, putative	OG0004121	5	PBANKA_1134600	PF3D7_1358300	PcyM_1113300	PCYB_112230	rhomboid protease ROM7, putative	FALSE
PVP01_0003280	PIR protein	NA	NA	NA	NA	NA	NA	NA	FALSE
PVP01_0003270	PIR protein	NA	NA	NA	NA	NA	NA	NA	FALSE
PVP01_0535000	PIR protein	NA	NA	NA	NA	NA	NA	NA	FALSE
PVP01_0523500	Plasmodium exported protein (PHIST), unknown function	NA	NA	NA	NA	NA	NA	NA	FALSE
PVP01_0932700	conserved Plasmodium protein, unknown function	OG0003805	5	PBANKA_0916500	PF3D7_1131900	PcyM_0936700	PCYB_093790	conserved Plasmodium protein, unknown function	TRUE
PVP01_0921800	conserved protein, unknown function	OG0001705	5	PBANKA_0927100	PF3D7_1121200	PcyM_0924200	PCYB_092720	conserved protein, unknown function	FALSE
PVP01_0121700	PIR protein	NA	NA	NA	NA	NA	NA	NA	FALSE
PVP01_0413800	ras-related protein Rab-5A, putative	OG0003335	5	PBANKA_0308000	PF3D7_0211200	PcyM_0411900	PCYB_041890	ras-related protein Rab-5A	FALSE
PVP01_1316900	conserved Plasmodium protein, unknown function	OG0001863	5	PBANKA_1012300	PF3D7_1432600	PcyM_1319100	PCYB_132620	conserved Plasmodium protein, unknown function	FALSE
PVP01_1310500	DNA helicase MCM8, putative	OG0001180	5	PBANKA_0609800	PF3D7_1211300	PcyM_1312200	PCYB_132000	DNA helicase MCM8, putative	FALSE
PVP01_1009600	conserved Plasmodium protein, unknown function	OG0004269	5	PBANKA_1239100	PF3D7_0524300	PcyM_1007500	PCYB_101740	conserved Plasmodium protein, unknown function	FALSE
PVP01_1270000	conserved Plasmodium protein, unknown function	OG0004295	5	PBANKA_1301100	PF3D7_1475100	PcyM_1279500	PCYB_127790	conserved Plasmodium protein, unknown function	FALSE
PVP01_0815800	tubulin binding cofactor c, putative	OG0002332	5	PBANKA_1214100	PF3D7_1015700	PcyM_0816400	PCYB_082550	tubulin binding cofactor c, putative	TRUE
PVP01_0420200	2-methoxy-6-polyprenyl-1,4-benzoquinol methylase, mitochondrial, putative	OG0000837	5	PBANKA_0302700	PF3D7_0204900	PcyM_0419900	PCYB_042530	2-methoxy-6-polyprenyl-1,4-benzoquinol methylase, mitochondrial, putative	FALSE
PVP01_0003480	PIR protein	NA	NA	NA	NA	NA	NA	NA	FALSE
PVP01_0603600	conserved Plasmodium protein, unknown function	OG0005318	3	NA	NA	PcyM_0603800	PCYB_061270	NA	FALSE
PVP01_0526500	mRNA-binding protein PUF2, putative	OG0003605	5	PBANKA_0719200	PF3D7_0417100	PcyM_0526800	PCYB_053140	mRNA-binding protein PUF2	TRUE
PVP01_1224800	apicoplast calcium binding protein 1, putative	OG0004444	5	PBANKA_1344700	PF3D7_1329700	PcyM_1227900	PCYB_123280	apicoplast calcium binding protein 1	TRUE
PVP01_0312800	conserved Plasmodium protein, unknown function	OG0003535	5	PBANKA_0614700	PF3D7_0717000	PcyM_0316300	PCYB_032070	conserved Plasmodium membrane protein, unknown function	FALSE
PVP01_1423900	tRNA Leucine	NA	NA	NA	NA	NA	NA	NA	FALSE
PVP01_0944700	40S ribosomal protein S21, putative	OG0001584	5	PBANKA_0905000	PF3D7_1144000	PcyM_0948800	PCYB_094960	40S ribosomal protein S21	TRUE
PVP01_0114300	Dpy-19-like C-mannosyltransferase, putative	OG0002384	5	PBANKA_1224500	PF3D7_0806200	PcyM_0115800	PCYB_012110	Dpy-19-like C-mannosyltransferase	FALSE
PVP01_0103000	tRNA Tyrosine	NA	NA	NA	NA	NA	NA	NA	FALSE
PVP01_0109500	glutaredoxin-like protein	OG0004218	5	PBANKA_1219700	PF3D7_0709200	PcyM_0110500	PCYB_011630	glutaredoxin-like protein	TRUE
PVP01_0929200	geranylgeranyl pyrophosphate synthase	OG0001654	5	PBANKA_0919800	PF3D7_1128400	PcyM_0933000	PCYB_093470	bifunctional farnesyl/geranylgeranyl diphosphate synthase	FALSE
PVP01_0002900	PIR protein	NA	NA	NA	NA	NA	NA	NA	FALSE
PVP01_0005850	PIR protein	NA	NA	NA	NA	NA	NA	NA	FALSE
PVP01_1240700	protein phosphatase containing kelch-like domains, putative	OG0002670	5	PBANKA_1329500	PF3D7_1466100	PcyM_1246700	PCYB_124890	protein phosphatase containing kelch-like domains	TRUE
PVP01_0733700	U2 small nuclear ribonucleoprotein B'', putative	OG0001564	5	PBANKA_0835800	PF3D7_0935000	PcyM_0737000	PCYB_074230	U2 small nuclear ribonucleoprotein B'', putative	FALSE
PVP01_0008540	PIR protein	NA	NA	NA	NA	NA	NA	NA	FALSE
PVP01_0918800	heat shock protein 90, putative	OG0001724	5	PBANKA_0929900	PF3D7_1118200	PcyM_0920700	PCYB_092430	heat shock protein 90, putative	TRUE
PVP01_0919300	myosin light chain B, putative	OG0003838	5	PBANKA_0929400	PF3D7_1118700	PcyM_0921300	PCYB_092480	myosin light chain B	FALSE
PVP01_0003010	PIR protein	NA	NA	NA	NA	NA	NA	NA	FALSE
PVP01_1200400	PIR protein	NA	NA	NA	NA	NA	NA	NA	FALSE
PVP01_1001500	PIR protein	NA	NA	NA	NA	NA	NA	NA	FALSE
PVP01_0534000	PIR protein	NA	NA	NA	NA	NA	NA	NA	FALSE
PVP01_0005530	PIR protein	NA	NA	NA	NA	NA	NA	NA	FALSE
PVP01_0916000	vivapain-2	NA	NA	NA	NA	NA	NA	NA	FALSE
PVP01_0738600	Plasmodium exported protein, unknown function	NA	NA	NA	NA	NA	NA	NA	FALSE
PVP01_0615300	claudin-like apicomplexan microneme protein, putative	OG0001076	5	PBANKA_0514200	PF3D7_1030200	PcyM_0618900	PCYB_062440	claudin-like apicomplexan microneme protein, putative	TRUE
PVP01_0202200	tryptophan-rich protein	NA	NA	NA	NA	NA	NA	NA	FALSE
PVP01_1226600	ribose-phosphate pyrophosphokinase, putative	OG0002745	5	PBANKA_1343000	PF3D7_1327800	PcyM_1230500	PCYB_123480	ribose-phosphate pyrophosphokinase, putative	FALSE
PVP01_0010370	PIR protein	NA	NA	NA	NA	NA	NA	NA	FALSE
PVP01_0733500	cAMP-dependent protein kinase catalytic subunit, putative	OG0000211	5	PBANKA_0835600	PF3D7_0934800	PcyM_0736700	PCYB_074210	cAMP-dependent protein kinase catalytic subunit	FALSE
PVP01_0726500	cytochrome c oxidase subunit 6B, putative	OG0001535	5	PBANKA_0828800	PF3D7_0928000	PcyM_0728000	PCYB_073560	cytochrome c oxidase subunit 6B, putative	FALSE
PVP01_0120700	Plasmodium exported protein, unknown function	NA	NA	NA	NA	NA	NA	NA	FALSE
PVP01_1341600	rRNA 2'-O-methyltransferase fibrillarin, putative	OG0001978	5	PBANKA_1035100	PF3D7_1407100	PcyM_1348900	PCYB_134930	rRNA 2'-O-methyltransferase fibrillarin, putative	FALSE
PVP01_0734000	phosphatidylinositol N-acetylglucosaminyltransferase subunit P, putative	OG0003749	5	PBANKA_0836100	PF3D7_0935300	PcyM_0737300	PCYB_074250	phosphatidylinositol N-acetylglucosaminyltransferase subunit P, putative	FALSE
PVP01_0826600	conserved Plasmodium protein, unknown function	OG0003390	5	PBANKA_0411300	PF3D7_0313600	PcyM_0828900	PCYB_083620	conserved Plasmodium protein, unknown function	FALSE
PVP01_0006770	PIR protein	NA	NA	NA	NA	NA	NA	NA	FALSE
PVP01_0000480	PIR protein	NA	NA	NA	NA	NA	NA	NA	FALSE
PVP01_0412400	conserved Plasmodium protein, unknown function	OG0003339	5	PBANKA_0309400	PF3D7_0212500	PcyM_0410500	PCYB_041760	conserved Plasmodium protein, unknown function	FALSE
PVP01_1346900	conserved protein, unknown function	OG0002006	5	PBANKA_1040000	PF3D7_1401900	PcyM_1354200	PCYB_135440	conserved protein, unknown function	FALSE
PVP01_0515200	BRIX domain, putative	OG0003581	5	PBANKA_0711700	PF3D7_0819100	PcyM_0515100	PCYB_052200	BRIX domain, putative	FALSE
PVP01_1416700	transcription factor MYB1, putative	OG0004557	5	PBANKA_1414300	PF3D7_1315800	PcyM_1417500	PCYB_142520	transcription factor MYB1	FALSE
PVP01_0004100	PIR protein	NA	NA	NA	NA	NA	NA	NA	FALSE
PVP01_1403800	conserved protein, unknown function	OG0004520	5	PBANKA_1401400	PF3D7_1302900	PcyM_1404400	PCYB_141240	conserved protein, unknown function	FALSE
PVP01_0817300	40S ribosomal protein S3A, putative	OG0002338	5	PBANKA_1215600	PF3D7_0322900	PcyM_0818300	PCYB_082690	40S ribosomal protein S3A, putative	FALSE
PVP01_0200800	PIR protein, pseudogene	NA	NA	NA	NA	NA	NA	NA	FALSE
PVP01_0605900	N-acetyltransferase, GNAT family, putative	OG0001029	5	PBANKA_0504900	PF3D7_1020700	PcyM_0607000	PCYB_061500	N-acetyltransferase, GNAT family, putative	FALSE
PVP01_1422400	cGMP-specific 3',5'-cyclic phosphodiesterase gamma, putative	OG0004573	5	PBANKA_1419900	PF3D7_1321600	PcyM_1423400	PCYB_143070	cGMP-specific 3',5'-cyclic phosphodiesterase gamma, putative	FALSE
PVP01_0709700	conserved Plasmodium protein, unknown function	OG0003663	5	PBANKA_0812300	PF3D7_0911200	PcyM_0709500	PCYB_071900	conserved Plasmodium protein, unknown function	FALSE
PVP01_1269500	vacuole membrane protein 1, putative	OG0002520	5	PBANKA_1301600	PF3D7_1474600	PcyM_1279000	PCYB_127740	vacuole membrane protein 1, putative	TRUE
PVP01_1262500	eukaryotic translation initiation factor 2-alpha kinase 1, putative	OG0004323	5	PBANKA_1308400	PF3D7_1444500	PcyM_1271300	PCYB_127060	eukaryotic translation initiation factor 2-alpha kinase 1	FALSE
PVP01_0915700	conserved protein, unknown function	OG0001740	5	PBANKA_0932700	PF3D7_1115000	PcyM_0917300	PCYB_092120	conserved protein, unknown function	FALSE
PVP01_0950100	Plasmodium exported protein, unknown function	NA	NA	NA	NA	NA	NA	NA	FALSE
PVP01_0939350	conserved protein, unknown function	OG0004890	3	PBANKA_0910350	PF3D7_1138350	NA	NA	conserved protein, unknown function	FALSE
PVP01_0720300	ribosome production factor 1, putative	OG0001497	5	PBANKA_0822700	PF3D7_0921800	PcyM_0720600	PCYB_072940	ribosome production factor 1, putative	FALSE
PVP01_1239800	magnesium transporter, putative	OG0005117	4	NA	PF3D7_1467000	PcyM_1245800	PCYB_124800	magnesium transporter, putative	FALSE
PVP01_0614200	conserved Plasmodium protein, unknown function	OG0000396	5	PBANKA_0513100	PF3D7_1029100	PcyM_0617800	PCYB_062330	conserved Plasmodium protein, unknown function	FALSE
PVP01_1422300	3',5'-cyclic nucleotide phosphodiesterase beta, putative	OG0002972	5	PBANKA_1419800	PF3D7_1321500	PcyM_1423300	PCYB_143060	3',5'-cyclic nucleotide phosphodiesterase beta	FALSE
PVP01_0838700	PIR protein	NA	NA	NA	NA	NA	NA	NA	FALSE
PVP01_0004170	PIR protein	NA	NA	NA	NA	NA	NA	NA	FALSE
PVP01_0304300	6-cysteine protein P41	OG0003891	5	PBANKA_1002600	PF3D7_0404900	PcyM_0307000	PCYB_031270	6-cysteine protein P41	FALSE
PVP01_1419700	translocation protein SEC63, putative	OG0002957	5	PBANKA_1417300	PF3D7_1318800	PcyM_1420600	PCYB_142800	translocation protein SEC63, putative	FALSE
PVP01_0619700	translation initiation factor IF-3, putative	OG0003468	5	PBANKA_0518400	PF3D7_1034600	PcyM_0624500	PCYB_062890	translation initiation factor IF-3, putative	FALSE
PVP01_0306700	conserved Plasmodium protein, unknown function	OG0003901	5	PBANKA_1005000	PF3D7_0407400	PcyM_0309800	PCYB_031510	conserved Plasmodium protein, unknown function	FALSE
PVP01_0304600	ag-1 blood stage membrane protein homologue	OG0003893	5	PBANKA_1002900	PF3D7_0405200	PcyM_0307400	PCYB_031300	ag-1 blood stage membrane protein homologue	FALSE
PVP01_0007140	PIR protein	NA	NA	NA	NA	NA	NA	NA	FALSE
PVP01_1343100	RING zinc finger protein, putative	OG0004002	5	PBANKA_1036500	PF3D7_1405700	PcyM_1350300	PCYB_135080	RING zinc finger protein, putative	TRUE
PVP01_1138200	SNARE associated Golgi protein, putative	OG0000730	5	PBANKA_0109300	PF3D7_0611000	PcyM_1140400	PCYB_114590	SNARE associated Golgi protein, putative	FALSE
PVP01_0608800	conserved protein, unknown function	OG0001044	5	PBANKA_0507800	PF3D7_1023600	PcyM_0610900	PCYB_061790	conserved protein, unknown function	FALSE
PVP01_0925700	conserved protein, unknown function	OG0001673	5	PBANKA_0923300	PF3D7_1125000	PcyM_0929000	PCYB_093110	conserved protein, unknown function	FALSE
PVP01_0724200	histone deacetylase 1, putative	OG0001520	5	PBANKA_0826500	PF3D7_0925700	PcyM_0724900	PCYB_073330	histone deacetylase 1	FALSE
PVP01_0008130	Plasmodium exported protein, unknown function	NA	NA	NA	NA	NA	NA	NA	FALSE
PVP01_0735100	Plasmodium exported protein, unknown function	OG0005325	3	NA	NA	PcyM_0738500	PCYB_074360	NA	FALSE
PVP01_0002400	PIR protein	NA	NA	NA	NA	NA	NA	NA	FALSE
PVP01_1026100	conserved Plasmodium protein, unknown function	OG0004033	5	PBANKA_1107500	PF3D7_0507900	PcyM_1026000	PCYB_103370	conserved Plasmodium protein, unknown function	TRUE
PVP01_0403000	Plasmodium exported protein, unknown function	NA	NA	NA	NA	NA	NA	NA	FALSE
PVP01_1223700	RNA-binding protein, putative	OG0004449	5	PBANKA_1345800	PF3D7_1330800	PcyM_1226600	PCYB_123170	RNA-binding protein, putative	FALSE
PVP01_0926100	mitochondrial import inner membrane translocase subunit TIM44, putative	OG0001670	5	PBANKA_0922900	PF3D7_1125400	PcyM_0929500	PCYB_093150	mitochondrial import inner membrane translocase subunit TIM44, putative	TRUE
PVP01_1126600	AP2 domain transcription factor AP2Tel, putative	OG0002118	5	PBANKA_1121800	PF3D7_0622900	PcyM_1127600	PCYB_113490	AP2 domain transcription factor AP2Tel	TRUE
PVP01_1111200	falcilysin, putative	OG0002201	5	PBANKA_1137000	PF3D7_1360800	PcyM_1110700	PCYB_111980	falcilysin	TRUE
PVP01_0615100	transcription elongation factor SPT4, putative	OG0001074	5	PBANKA_0514000	PF3D7_1030000	PcyM_0618700	PCYB_062420	transcription elongation factor SPT4, putative	FALSE
PVP01_1265700	serine/threonine protein kinase, putative	OG0004311	5	PBANKA_1305200	PF3D7_1441300	PcyM_1274600	PCYB_127380	serine/threonine protein kinase, putative	FALSE
PVP01_1103500	heptatricopeptide repeat-containing protein, putative	OG0002247	5	PBANKA_1144400	PF3D7_1368500	PcyM_1102700	PCYB_111200	heptatricopeptide repeat-containing protein, putative	TRUE
PVP01_0915800	conserved protein, unknown function	OG0001739	5	PBANKA_0932600	PF3D7_1115100	PcyM_0917400	PCYB_092130	conserved protein, unknown function	FALSE
PVP01_0413100	asparagine--tRNA ligase, putative	OG0000866	5	PBANKA_0308600	PF3D7_0211800	PcyM_0411200	PCYB_041830	asparagine--tRNA ligase	FALSE
PVP01_0928600	conserved Plasmodium protein, unknown function	OG0003818	5	PBANKA_0920500	PF3D7_1127900	PcyM_0932300	PCYB_093400	conserved Plasmodium protein, unknown function	TRUE
PVP01_0001750	Plasmodium exported protein, unknown function	NA	NA	NA	NA	NA	NA	NA	FALSE
PVP01_1451000	conserved Plasmodium protein, unknown function	OG0004662	5	PBANKA_1447500	PF3D7_1232800	PcyM_1455700	PCYB_145850	conserved Plasmodium protein, unknown function	FALSE
PVP01_0309600	protein phosphatase PPM1, putative	OG0001835	5	PBANKA_1007700	PF3D7_0410300	PcyM_0312700	PCYB_031780	protein phosphatase PPM1, putative	FALSE
PVP01_1029400	2-oxoisovalerate dehydrogenase subunit beta, mitochondrial, putative	OG0002024	5	PBANKA_1104200	PF3D7_0504600	PcyM_1029500	PCYB_103700	2-oxoisovalerate dehydrogenase subunit beta, mitochondrial, putative	FALSE
PVP01_0219200	Plasmodium exported protein, unknown function	NA	NA	NA	NA	NA	NA	NA	FALSE
PVP01_1030600	serine/arginine-rich splicing factor 12, putative	NA	NA	NA	NA	NA	NA	NA	TRUE
PVP01_0411300	conserved Plasmodium protein, unknown function	OG0003344	5	PBANKA_0310500	PF3D7_0213600	PcyM_0409000	PCYB_041660	conserved Plasmodium protein, unknown function	TRUE
PVP01_0949100	Plasmodium exported protein, unknown function	NA	NA	NA	NA	NA	NA	NA	FALSE
PVP01_1204800	conserved Plasmodium protein, unknown function	OG0004509	5	PBANKA_1362800	PF3D7_1350000	PcyM_1206200	PCYB_121370	conserved Plasmodium protein, unknown function	FALSE
PVP01_0207900	2-C-methyl-D-erythritol 4-phosphate cytidylyltransferase	OG0003287	5	PBANKA_0206400	PF3D7_0106900	PcyM_0210300	PCYB_021710	2-C-methyl-D-erythritol 4-phosphate cytidylyltransferase, putative	FALSE
PVP01_1468400	thymidylate kinase, putative	OG0003226	5	PBANKA_1464200	PF3D7_1251300	PcyM_1475400	PCYB_147570	thymidylate kinase	FALSE
PVP01_0816900	conserved protein, unknown function	OG0004200	5	PBANKA_1215200	PF3D7_0323300	PcyM_0817900	PCYB_082650	conserved protein, unknown function	FALSE
PVP01_0414900	secretory complex protein 61 gamma subunit, putative	OG0000859	5	PBANKA_0306900	PF3D7_0210000	PcyM_0413200	PCYB_042000	secretory complex protein 61 gamma subunit	TRUE
PVP01_MIT00500	ribosomal RNA fragment	NA	NA	NA	NA	NA	NA	NA	FALSE
PVP01_0509700	Fe-S cluster assembly protein DRE2, putative	OG0001291	5	PBANKA_0706000	PF3D7_0824600	PcyM_0508800	PCYB_051660	Fe-S cluster assembly protein DRE2, putative	TRUE
PVP01_0611600	cell division cycle protein 20 homolog, putative	NA	NA	NA	NA	NA	NA	NA	FALSE
PVP01_0828800	kinase-related protein PKRP, putative	OG0000964	5	PBANKA_0409400	PF3D7_0311400	PcyM_0831300	PCYB_083810	kinase-related protein PKRP, putative	FALSE
PVP01_0527300	conserved Plasmodium protein, unknown function	OG0003607	5	PBANKA_0720000	PF3D7_0417900	PcyM_0527600	PCYB_053220	conserved Plasmodium protein, unknown function	FALSE
PVP01_0310900	tRNA Glutamic acid	NA	NA	NA	NA	NA	NA	NA	FALSE
PVP01_1329500	conserved Plasmodium protein, unknown function	OG0003962	5	PBANKA_1023800	PF3D7_1419400	PcyM_1334800	PCYB_133780	conserved Plasmodium membrane protein, unknown function	FALSE
PVP01_1327300	conserved Plasmodium protein, unknown function	OG0003955	5	PBANKA_1021700	PF3D7_1421600	PcyM_1332100	PCYB_133560	conserved Plasmodium protein, unknown function	FALSE
PVP01_1248900	vivapain-1	OG0004365	5	PBANKA_1321700	PF3D7_1458000	PcyM_1255400	PCYB_125710	cysteine proteinase falcipain 1	TRUE
PVP01_0737700	PIR protein	NA	NA	NA	NA	NA	NA	NA	FALSE
PVP01_1419100	glycerol-3-phosphate 1-O-acyltransferase, putative	OG0002953	5	PBANKA_1416700	PF3D7_1318200	PcyM_1419900	PCYB_142750	glycerol-3-phosphate 1-O-acyltransferase	FALSE
PVP01_1314300	conserved protein, unknown function	OG0001844	5	PBANKA_1009600	PF3D7_1435200	PcyM_1316300	PCYB_132370	conserved protein, unknown function	FALSE
PVP01_1257800	conserved Plasmodium protein, unknown function	OG0005570	2	NA	NA	PcyM_1266100	NA	NA	TRUE
PVP01_1119300	secreted ookinete protein, putative	OG0002159	5	PBANKA_1129000	PF3D7_0630200	PcyM_1119700	PCYB_112780	secreted ookinete protein, putative	FALSE
PVP01_1267200	vesicle-associated membrane protein, putative	OG0002533	5	PBANKA_1303700	PF3D7_1439800	PcyM_1276100	PCYB_127530	vesicle-associated membrane protein, putative	FALSE
PVP01_1224600	conserved Plasmodium protein, unknown function	OG0004446	5	PBANKA_1344900	PF3D7_1329900	PcyM_1227700	PCYB_123260	conserved Plasmodium protein, unknown function	FALSE
PVP01_1137600	basal complex transmembrane protein 1, putative	OG0003269	5	PBANKA_0109900	PF3D7_0611600	PcyM_1139700	PCYB_114530	basal complex transmembrane protein 1	TRUE
PVP01_0010210	merozoite surface protein 3, putative	NA	NA	NA	NA	NA	NA	NA	FALSE
PVP01_0002840	PIR protein	NA	NA	NA	NA	NA	NA	NA	FALSE
PVP01_0803900	WD repeat-containing protein, putative	OG0002264	5	PBANKA_1202500	PF3D7_1004200	PcyM_0803500	PCYB_081350	WD repeat-containing protein, putative	FALSE
PVP01_1469200	rhoptry neck protein 3, putative	OG0004716	5	PBANKA_1464900	PF3D7_1252100	PcyM_1476200	PCYB_147630	rhoptry neck protein 3	FALSE
PVP01_1148000	PIR protein	NA	NA	NA	NA	NA	NA	NA	FALSE
PVP01_1332900	conserved Plasmodium protein, unknown function	OG0003974	5	PBANKA_1026700	PF3D7_1416000	PcyM_1338600	PCYB_134070	conserved Plasmodium protein, unknown function	FALSE
PVP01_0422900	Plasmodium exported protein, unknown function	OG0005506	2	NA	NA	NA	PCYB_042790	NA	FALSE
PVP01_0940600	ER membrane protein complex subunit 8, putative	OG0001603	5	PBANKA_0909100	PF3D7_1139900	PcyM_0944700	PCYB_094550	ER membrane protein complex subunit 8, putative	FALSE
PVP01_0904400	actin-like protein, putative	OG0001801	5	PBANKA_0943300	PF3D7_1103600	PcyM_0905400	PCYB_091070	actin-like protein, putative	FALSE
PVP01_0944600	ATP-dependent (S)-NAD(P)H-hydrate dehydratase, putative	OG0001585	5	PBANKA_0905100	PF3D7_1143900	PcyM_0948700	PCYB_094950	ATP-dependent (S)-NAD(P)H-hydrate dehydratase, putative	FALSE
PVP01_1417700	protein transport protein SEC20, putative	OG0002944	5	PBANKA_1415300	PF3D7_1316800	PcyM_1418500	PCYB_142610	protein transport protein SEC20, putative	FALSE
PVP01_1313300	basal complex protein BCP1, putative	OG0005000	4	NA	PF3D7_1436200	PcyM_1315300	PCYB_132270	basal complex protein BCP1	FALSE
PVP01_0924100	golgi protein 2, putative	OG0003828	5	PBANKA_0924800	PF3D7_1123500	PcyM_0927300	PCYB_092950	golgi protein 2	TRUE
PVP01_1305600	Tat binding protein 1(TBP-1)-interacting protein, putative	OG0001155	5	PBANKA_0605100	PF3D7_1206500	PcyM_1306900	PCYB_131510	Tat binding protein 1(TBP-1)-interacting protein, putative	FALSE
PVP01_0200600	PIR protein	NA	NA	NA	NA	NA	NA	NA	FALSE
PVP01_0902800	hypothetical protein	NA	NA	NA	NA	NA	NA	NA	FALSE
PVP01_1329300	conserved Plasmodium protein, unknown function	OG0003960	5	PBANKA_1023600	PF3D7_1419600	PcyM_1334600	PCYB_133760	conserved Plasmodium protein, unknown function	FALSE
PVP01_1115700	mitochondrial import inner membrane translocase subunit TIM23, putative	OG0002177	5	PBANKA_1132500	PF3D7_1356200	PcyM_1115500	PCYB_112430	mitochondrial import inner membrane translocase subunit TIM23, putative	FALSE
PVP01_0007360	Plasmodium exported protein, unknown function	NA	NA	NA	NA	NA	NA	NA	FALSE
PVP01_0007260	Plasmodium exported protein, unknown function	NA	NA	NA	NA	NA	NA	NA	FALSE
PVP01_0214700	signal recognition particle subunit SRP9, putative	OG0000814	5	PBANKA_0213100	PF3D7_0729000	PcyM_0218200	PCYB_022390	signal recognition particle subunit SRP9	FALSE
PVP01_0617300	conserved Plasmodium protein, unknown function	OG0003464	5	PBANKA_0516000	PF3D7_1032200	PcyM_0621300	PCYB_062650	conserved Plasmodium protein, unknown function	TRUE
PVP01_1241600	mediator of RNA polymerase II transcription subunit 4, putative	OG0002665	5	PBANKA_1328600	PF3D7_1465200	PcyM_1247600	PCYB_124980	mediator of RNA polymerase II transcription subunit 4, putative	FALSE
PVP01_0104700	serine/threonine protein kinase, putative	OG0003628	5	PBANKA_0802200	PF3D7_0704500	PcyM_0104800	PCYB_011190	serine/threonine protein kinase, putative	TRUE
PVP01_0601900	Plasmodium exported protein (PHIST), unknown function	OG0005076	4	NA	PF3D7_1016800	PcyM_0601900	PCYB_061100	Plasmodium exported protein (PHISTc), unknown function	FALSE
PVP01_0003650	PIR protein	NA	NA	NA	NA	NA	NA	NA	FALSE
PVP01_1314600	conserved Plasmodium protein, unknown function	OG0003919	5	PBANKA_1009900	PF3D7_1434900	PcyM_1316700	PCYB_132400	conserved Plasmodium protein, unknown function	FALSE
PVP01_1012600	zinc finger protein, putative	OG0002462	5	PBANKA_1235900	PF3D7_0521300	PcyM_1010500	PCYB_102050	zinc finger protein, putative	TRUE
PVP01_1227100	conserved Plasmodium protein, unknown function	OG0004436	5	PBANKA_1342500	PF3D7_1327300	PcyM_1231000	PCYB_123530	conserved Plasmodium protein, unknown function	TRUE
PVP01_0005550	PIR protein	OG0005674	2	NA	NA	NA	PCYB_001580	NA	FALSE
PVP01_1467300	CSC1-like protein, putative	OG0003218	5	PBANKA_1463100	PF3D7_1250200	PcyM_1474200	PCYB_147460	CSC1-like protein, putative	FALSE
PVP01_0405000	liver stage antigen 3, putative	NA	NA	NA	NA	NA	NA	NA	FALSE
PVP01_1226700	regulator of nonsense transcripts 3B, putative	OG0002744	5	PBANKA_1342900	PF3D7_1327700	PcyM_1230600	PCYB_123490	regulator of nonsense transcripts 3B, putative	FALSE
PVP01_1032300	conserved protein, unknown function	OG0002014	5	PBANKA_1102400	PF3D7_0502700	PcyM_1033000	PCYB_104020	conserved protein, unknown function	FALSE
PVP01_0010500	PIR protein	NA	NA	NA	NA	NA	NA	NA	FALSE
PVP01_1442300	conserved protein, unknown function	OG0003086	5	PBANKA_1439000	PF3D7_1224100	PcyM_1444500	PCYB_144980	conserved protein, unknown function	TRUE
PVP01_0944200	conserved Plasmodium protein, unknown function	OG0003764	5	PBANKA_0905500	PF3D7_1143500	PcyM_0948300	PCYB_094910	conserved Plasmodium protein, unknown function	FALSE
PVP01_0719300	U4/U6 snRNA-associated-splicing factor, putative	OG0003697	5	PBANKA_0821800	PF3D7_0920900	PcyM_0719600	PCYB_072840	U4/U6 snRNA-associated-splicing factor, putative	FALSE
PVP01_0104100	conserved Plasmodium protein, unknown function	OG0003624	5	PBANKA_0801600	PF3D7_0703900	PcyM_0104200	PCYB_011130	conserved Plasmodium membrane protein, unknown function	FALSE
PVP01_1135400	syntaxin-binding protein, putative	OG0000743	5	PBANKA_0112000	PF3D7_0613700	PcyM_1137300	PCYB_114340	syntaxin-binding protein, putative	TRUE
PVP01_0946300	TMEM65 domain-containing protein, putative	OG0000454	5	PBANKA_0903400	PF3D7_1145600	PcyM_0950700	PCYB_095120	TMEM65 domain-containing protein, putative	FALSE
PVP01_0814400	SPRY domain-containing protein, putative	OG0002324	5	PBANKA_1212700	PF3D7_1014300	PcyM_0815000	PCYB_082410	SPRY domain-containing protein, putative	FALSE
PVP01_1449400	conserved Plasmodium protein, unknown function	OG0004654	5	PBANKA_1445900	PF3D7_1231200	PcyM_1453700	PCYB_145680	conserved Plasmodium protein, unknown function	TRUE
PVP01_1441100	conserved Plasmodium protein, unknown function	OG0004628	5	PBANKA_1437800	PF3D7_1222900	PcyM_1443000	PCYB_144860	conserved Plasmodium protein, unknown function	FALSE
PVP01_1260500	nucleoporin NUP313, putative	OG0004327	5	PBANKA_1310200	PF3D7_1446500	PcyM_1269300	PCYB_126860	nucleoporin NUP313, putative	FALSE
PVP01_1240800	conserved protein, unknown function	OG0002669	5	PBANKA_1329400	PF3D7_1466000	PcyM_1246800	PCYB_124900	conserved protein, unknown function	FALSE
PVP01_1245500	40S ribosomal protein S28e, putative	OG0002650	5	PBANKA_1325000	PF3D7_1461300	PcyM_1251800	PCYB_125370	40S ribosomal protein S28e, putative	TRUE
PVP01_1419500	conserved Plasmodium protein, unknown function	OG0002955	5	PBANKA_1417100	PF3D7_1318600	PcyM_1420300	PCYB_142780	conserved Plasmodium protein, unknown function	FALSE
PVP01_1329800	ATP-dependent RNA helicase DDX55, putative	OG0001921	5	PBANKA_1024100	PF3D7_1419100	PcyM_1335100	PCYB_133810	ATP-dependent RNA helicase DDX55	FALSE
PVP01_0947600	sporozoite asparagine-rich protein	OG0003753	5	PBANKA_0902100	PF3D7_1147000	PcyM_0952100	PCYB_095240	sporozoite and liver stage asparagine-rich protein	TRUE
PVP01_0010030	Plasmodium exported protein, unknown function	NA	NA	NA	NA	NA	NA	NA	FALSE
PVP01_0002920	PIR protein	NA	NA	NA	NA	NA	NA	NA	FALSE
PVP01_0703900	conserved protein, unknown function	OG0000994	5	PBANKA_0415900	PF3D7_0905500	PcyM_0703200	PCYB_071330	conserved protein, unknown function	FALSE
PVP01_1032800	protein Mpv17, putative	NA	NA	NA	NA	NA	NA	NA	FALSE
PVP01_0008960	Plasmodium exported protein, unknown function	NA	NA	NA	NA	NA	NA	NA	FALSE
PVP01_1420300	conserved protein, unknown function	OG0002960	5	PBANKA_1417900	PF3D7_1319400	PcyM_1421200	PCYB_142860	conserved protein, unknown function	TRUE
PVP01_1410700	vacuolar protein sorting-associated protein 18, putative	OG0002897	5	PBANKA_1408200	PF3D7_1309700	PcyM_1411300	PCYB_141920	vacuolar protein sorting-associated protein 18, putative	TRUE
PVP01_API01700	apicoplast ribosomal protein L16, putative	OG0004846	4	PBANKA_API00380	PF3D7_API01800	PcyM_API03000	NA	apicoplast ribosomal protein L16	FALSE
PVP01_1032100	Tim10/DDP family zinc finger protein, putative	OG0002015	5	PBANKA_1102600	PF3D7_0502900	PcyM_1032800	PCYB_104000	Tim10/DDP family zinc finger protein, putative	FALSE
PVP01_0004730	PIR protein	NA	NA	NA	NA	NA	NA	NA	FALSE
PVP01_1227000	conserved Plasmodium protein, unknown function	OG0004437	5	PBANKA_1342600	PF3D7_1327400	PcyM_1230900	PCYB_123520	conserved Plasmodium protein, unknown function	TRUE
PVP01_0207000	conserved Plasmodium protein, unknown function	OG0003285	5	PBANKA_0205500	PF3D7_0107900	PcyM_0209200	PCYB_021620	conserved Plasmodium protein, unknown function	FALSE
PVP01_1216200	conserved Plasmodium protein, unknown function	OG0004467	5	PBANKA_1352200	PF3D7_1338500	PcyM_1218600	PCYB_122440	conserved Plasmodium protein, unknown function	TRUE
PVP01_0920900	CorA-like Mg2 transporter protein, putative	OG0001710	5	PBANKA_0927900	PF3D7_1120300	PcyM_0923300	PCYB_092640	CorA-like Mg2 transporter protein, putative	TRUE
PVP01_1432300	integral membrane protein GPR180, putative	OG0004601	5	PBANKA_1429300	PF3D7_1213500	PcyM_1433800	PCYB_144010	integral membrane protein GPR180, putative	FALSE
PVP01_0945900	serine/threonine protein kinase, putative	OG0001577	5	PBANKA_0903800	PF3D7_1145200	PcyM_0950300	PCYB_095080	serine/threonine protein kinase, putative	TRUE
PVP01_0002800	PIR protein, fragment	NA	NA	NA	NA	NA	NA	NA	FALSE
PVP01_1246400	ubiquitin carboxyl-terminal hydrolase isozyme L3, putative	OG0002643	5	PBANKA_1324100	PF3D7_1460400	PcyM_1252900	PCYB_125460	ubiquitin carboxyl-terminal hydrolase isozyme L3	FALSE
PVP01_1343300	COBW domain-containing protein 1, putative	OG0001988	5	PBANKA_1036700	PF3D7_1405500	PcyM_1350500	PCYB_135100	COBW domain-containing protein 1, putative	FALSE
PVP01_0506900	ribosomal protein L21, apicoplast, putative	OG0001272	5	PBANKA_0703200	PF3D7_0827500	PcyM_0505900	PCYB_051380	ribosomal protein L21, apicoplast, putative	FALSE
PVP01_0826200	HSP20-like chaperone, putative	OG0000977	5	PBANKA_0411700	PF3D7_0314000	PcyM_0828300	PCYB_083580	HSP20-like chaperone, putative	TRUE
PVP01_0802200	transformer-2 protein homolog beta, putative	OG0002253	5	PBANKA_1200800	PF3D7_1002400	PcyM_0801800	PCYB_081180	transformer-2 protein homolog beta, putative	TRUE
PVP01_1414400	conserved Plasmodium protein, unknown function	NA	NA	NA	NA	NA	NA	NA	FALSE
PVP01_0943800	AP2 domain transcription factor AP2-O, putative	OG0001589	5	PBANKA_0905900	PF3D7_1143100	PcyM_0947900	PCYB_094870	AP2 domain transcription factor AP2-O, putative	FALSE
PVP01_0112400	conserved Plasmodium protein, unknown function	OG0004230	5	PBANKA_1222700	PF3D7_0808000	PcyM_0113500	PCYB_011920	conserved Plasmodium protein, unknown function	FALSE
PVP01_1272400	PIR protein	NA	NA	NA	NA	NA	NA	NA	FALSE
PVP01_0009880	PIR protein, pseudogene	NA	NA	NA	NA	NA	NA	NA	FALSE
PVP01_0713200	GINS complex subunit Psf3, putative	NA	NA	NA	NA	NA	NA	NA	TRUE
PVP01_API01200	50S ribosomal protein L4, putative	OG0004730	4	PBANKA_API00430	PF3D7_API01300	PcyM_API03500	NA	50S ribosomal protein L4, putative	FALSE
PVP01_0722500	patatin-like phospholipase, putative	OG0001512	5	PBANKA_0824900	PF3D7_0924000	PcyM_0723100	PCYB_073160	patatin-like phospholipase, putative	TRUE
PVP01_1308300	U6 snRNA-associated Sm-like protein LSm7, putative	OG0001169	5	PBANKA_0607600	PF3D7_1209200	PcyM_1309800	PCYB_131780	U6 snRNA-associated Sm-like protein LSm7, putative	FALSE
PVP01_1018000	NLI interacting factor-like phosphatase, putative	OG0002085	5	PBANKA_1115500	PF3D7_0515900	PcyM_1016700	PCYB_102580	NLI interacting factor-like phosphatase, putative	FALSE
PVP01_0319600	RNA-binding protein, putative	OG0001249	5	PBANKA_0621400	PF3D7_0723900	PcyM_0324400	PCYB_032770	RNA-binding protein, putative	FALSE
PVP01_0734900	Plasmodium exported protein (PHIST), unknown function	NA	NA	NA	NA	NA	NA	NA	FALSE
PVP01_0401100	Plasmodium exported protein, unknown function	NA	NA	NA	NA	NA	NA	NA	FALSE
PVP01_1124800	N-acetylglucosaminyl-phosphatidylinositol de-N-acetylase, putative	OG0004088	4	PBANKA_1123600	PF3D7_0624700	PcyM_1125500	NA	N-acetylglucosaminyl-phosphatidylinositol de-N-acetylase, putative	TRUE
PVP01_0715000	methyltransferase, putative	OG0001472	5	PBANKA_0817600	PF3D7_0916600	PcyM_0714700	PCYB_072420	methyltransferase, putative	TRUE
PVP01_1407100	conserved protein, unknown function	OG0000608	5	PBANKA_1404700	PF3D7_1306200	PcyM_1407700	PCYB_141570	conserved protein, unknown function	FALSE
PVP01_1271500	lysophospholipase, putative	NA	NA	NA	NA	NA	NA	NA	FALSE
PVP01_1271600	Plasmodium exported protein, unknown function	OG0005371	3	NA	NA	PcyM_1281100	PCYB_005840	NA	FALSE
PVP01_1343000	ribosome biogenesis protein BOP1, putative	OG0001986	5	PBANKA_1036400	PF3D7_1405800	PcyM_1350200	PCYB_135070	ribosome biogenesis protein BOP1, putative	TRUE
PVP01_0529900	ribosome-recycling factor, putative	OG0001119	5	PBANKA_0521800	PF3D7_0420400	PcyM_0530700	PCYB_053480	ribosome-recycling factor	FALSE
PVP01_1472300	PIR protein	NA	NA	NA	NA	NA	NA	NA	FALSE
PVP01_1336300	deoxyhypusine synthase, putative	OG0001954	5	PBANKA_1030000	PF3D7_1412600	PcyM_1342500	PCYB_134410	deoxyhypusine synthase	FALSE
PVP01_0731700	CSTF domain-containing protein, putative	OG0000450	5	PBANKA_0833800	PF3D7_0933000	PcyM_0734500	PCYB_074050	CSTF domain-containing protein, putative	FALSE
PVP01_1208300	conserved Plasmodium protein, unknown function	OG0004494	5	PBANKA_1359400	PF3D7_1346500	PcyM_1209900	PCYB_121720	conserved Plasmodium protein, unknown function	FALSE
PVP01_0800200	PIR protein, pseudogene	NA	NA	NA	NA	NA	NA	NA	FALSE
PVP01_0106200	importin-7, putative	OG0001394	5	PBANKA_0803600	PF3D7_0706000	PcyM_0106600	PCYB_011340	importin-7, putative	TRUE
PVP01_1444100	conserved Plasmodium protein, unknown function	OG0004638	5	PBANKA_1440800	PF3D7_1225900	PcyM_1446800	PCYB_145160	conserved Plasmodium protein, unknown function	FALSE
PVP01_0521600	conserved protein, unknown function	OG0003597	5	PBANKA_0717100	PF3D7_0415100	PcyM_0523100	PCYB_052820	conserved protein, unknown function	FALSE
PVP01_0301700	Plasmodium exported protein, unknown function	NA	NA	NA	NA	NA	NA	NA	FALSE
PVP01_0007290	PIR protein	NA	NA	NA	NA	NA	NA	NA	FALSE
PVP01_1407500	V-type proton ATPase subunit H, putative	OG0002881	5	PBANKA_1405100	PF3D7_1306600	PcyM_1408100	PCYB_141610	V-type proton ATPase subunit H, putative	FALSE
PVP01_0948500	peroxisome assembly protein 22, putative	OG0001567	5	PBANKA_0901200	PF3D7_1147900	PcyM_0953100	PCYB_095310	peroxisome assembly protein 22, putative	FALSE
PVP01_0415800	6-cysteine protein P230, putative	OG0003329	5	PBANKA_0306100	PF3D7_0209000	PcyM_0414300	PCYB_042090	6-cysteine protein P230	FALSE
PVP01_0006650	PIR protein, pseudogene	NA	NA	NA	NA	NA	NA	NA	FALSE
PVP01_1270200	cytochrome c oxidase assembly protein COX11, putative	OG0002516	5	PBANKA_1300900	PF3D7_1475300	PcyM_1279700	PCYB_127810	cytochrome c oxidase assembly protein COX11, putative	FALSE
PVP01_0518600	trafficking protein particle complex subunit 2-like protein, putative	OG0001337	5	PBANKA_0714100	PF3D7_0816700	PcyM_0519500	PCYB_052510	trafficking protein particle complex subunit 2-like protein, putative	FALSE
PVP01_1428200	proteasome activator complex subunit 4, putative	OG0003010	5	PBANKA_1425400	PF3D7_0812100	PcyM_1429500	PCYB_143610	proteasome activator complex subunit 4, putative	FALSE
PVP01_1128600	tRNA Leucine	NA	NA	NA	NA	NA	NA	NA	FALSE
PVP01_0816800	protein RIPR, putative	OG0004199	5	PBANKA_1215100	PF3D7_0323400	PcyM_0817800	PCYB_082640	Rh5 interacting protein	FALSE
PVP01_1339400	histidine phosphatase, putative	NA	NA	NA	NA	NA	NA	NA	TRUE
PVP01_0005720	PIR protein	NA	NA	NA	NA	NA	NA	NA	FALSE
PVP01_1344800	DNA-directed RNA polymerase II subunit RPB4, putative	OG0004008	5	PBANKA_1038100	PF3D7_1404000	PcyM_1352100	PCYB_135250	DNA-directed RNA polymerase II subunit RPB4, putative	FALSE
PVP01_0003460	Plasmodium exported protein, unknown function	NA	NA	NA	NA	NA	NA	NA	FALSE
PVP01_0901500	hypothetical protein	NA	NA	NA	NA	NA	NA	NA	FALSE
PVP01_0822100	conserved Plasmodium protein, unknown function	OG0003648	5	PBANKA_0807200	PF3D7_0318000	PcyM_0823900	PCYB_083170	conserved Plasmodium protein, unknown function	FALSE
PVP01_0824100	microneme associated antigen, putative	OG0000983	5	PBANKA_0413800	PF3D7_0316000	PcyM_0826000	PCYB_083370	microneme associated antigen	FALSE
PVP01_0510200	3'-5' exonuclease, putative	OG0000416	5	PBANKA_0706500	PF3D7_0824100	PcyM_0509400	PCYB_051710	3'-5' exonuclease, putative	FALSE
PVP01_0005230	PIR protein	NA	NA	NA	NA	NA	NA	NA	FALSE
PVP01_1247100	bax inhibitor 1, putative	OG0002637	5	PBANKA_1323400	PF3D7_1459800	PcyM_1253600	PCYB_125530	bax inhibitor 1, putative	TRUE
PVP01_0002880	PIR protein	NA	NA	NA	NA	NA	NA	NA	FALSE
PVP01_1006000	tRNA Leucine	NA	NA	NA	NA	NA	NA	NA	FALSE
PVP01_0602200	DNA polymerase delta catalytic subunit, putative	OG0001011	5	PBANKA_0501300	PF3D7_1017000	PcyM_0602300	PCYB_061130	DNA polymerase delta catalytic subunit	TRUE
PVP01_0803300	40S ribosomal protein S20e, putative	OG0002260	5	PBANKA_1201900	PF3D7_1003500	PcyM_0802900	PCYB_081290	40S ribosomal protein S20e, putative	FALSE
PVP01_0207600	CCR4 domain-containing protein 3, putative	OG0000775	5	PBANKA_0206100	PF3D7_0107200	PcyM_0209800	PCYB_021680	CCR4 domain-containing protein 3, putative	FALSE
PVP01_0401900	PIR protein	NA	NA	NA	NA	NA	NA	NA	FALSE
PVP01_1007200	conserved Plasmodium protein, unknown function, pseudogene	NA	NA	NA	NA	NA	NA	NA	FALSE
PVP01_1009100	ubiquitin fusion degradation protein 1, putative	OG0004271	5	PBANKA_1239600	PF3D7_0524800	PcyM_1006900	PCYB_101690	ubiquitin fusion degradation protein 1, putative	FALSE
PVP01_0006120	Plasmodium exported protein, unknown function	NA	NA	NA	NA	NA	NA	NA	FALSE
PVP01_1131300	conserved protein, unknown function	OG0002095	5	PBANKA_1117400	PF3D7_0618200	PcyM_1132500	PCYB_113930	conserved protein, unknown function	FALSE
PVP01_0622200	dynein intermediate chain, putative	OG0001116	5	PBANKA_0520700	PF3D7_1037800	PcyM_0627200	PCYB_063150	dynein intermediate chain, putative	FALSE
PVP01_1143400	cyclin dependent kinase binding protein, putative	OG0000697	5	PBANKA_0104300	PF3D7_0605500	PcyM_1146600	PCYB_115090	cyclin dependent kinase binding protein, putative	FALSE
PVP01_0414200	syntaxin, Qa-SNARE family, putative	OG0000862	5	PBANKA_0307600	PF3D7_0210700	PcyM_0412500	PCYB_041930	syntaxin, Qa-SNARE family	TRUE
PVP01_1221400	transmembrane emp24 domain-containing protein, putative	OG0002771	5	PBANKA_1348000	PF3D7_1333300	PcyM_1224200	PCYB_122950	transmembrane emp24 domain-containing protein, putative	TRUE
PVP01_0827500	tRNA Isoleucine	NA	NA	NA	NA	NA	NA	NA	FALSE
PVP01_0712800	protein KIC3, putative	OG0001462	5	PBANKA_0815400	PF3D7_0914400	PcyM_0712600	PCYB_072200	protein KIC3	FALSE
PVP01_1328400	protein GPR89, putative	OG0003959	5	PBANKA_1022700	PF3D7_1420500	PcyM_1333500	PCYB_133670	protein GPR89, putative	FALSE
PVP01_1410000	conserved protein, unknown function	OG0004541	5	PBANKA_1407500	PF3D7_1309000	PcyM_1410600	PCYB_141850	conserved protein, unknown function	FALSE
PVP01_0613500	ribosome biogenesis protein RPF2, putative	OG0001069	5	PBANKA_0512500	PF3D7_1028400	PcyM_0616800	PCYB_062250	ribosome biogenesis protein RPF2, putative	FALSE
PVP01_0719200	inosine-5'-monophosphate dehydrogenase, putative	OG0001494	5	PBANKA_0821700	PF3D7_0920800	PcyM_0719500	PCYB_072830	inosine-5'-monophosphate dehydrogenase	FALSE
PVP01_1432600	proline--tRNA ligase, putative	OG0003033	5	PBANKA_1429600	PF3D7_1213800	PcyM_1434100	PCYB_144040	proline--tRNA ligase	FALSE
PVP01_0906700	conserved Plasmodium protein, unknown function	OG0003872	5	PBANKA_0941000	PF3D7_1105900	PcyM_0907700	PCYB_091290	conserved Plasmodium membrane protein, unknown function	FALSE
PVP01_0004270	hypothetical protein, pseudogene	NA	NA	NA	NA	NA	NA	NA	FALSE
PVP01_0731200	palmitoyltransferase DHHC6, putative	OG0000449	5	PBANKA_0833300	PF3D7_0932500	PcyM_0733900	PCYB_074000	palmitoyltransferase DHHC6, putative	FALSE
PVP01_0729200	peptidyl-prolyl cis-trans isomerase, putative	OG0001546	5	PBANKA_0831300	PF3D7_0930600	PcyM_0731500	PCYB_073800	peptidyl-prolyl cis-trans isomerase	FALSE
PVP01_0007280	Plasmodium exported protein, unknown function	NA	NA	NA	NA	NA	NA	NA	FALSE
PVP01_0002340	Plasmodium exported protein, unknown function	NA	NA	NA	NA	NA	NA	NA	FALSE
PVP01_1443900	VAC14 domain-containing protein, putative	OG0003096	5	PBANKA_1440600	PF3D7_1225700	PcyM_1446600	PCYB_145140	VAC14 domain-containing protein, putative	FALSE
PVP01_1103000	glycosylphosphatidylinositol anchor attachment 1 protein, putative	OG0002251	5	PBANKA_1144900	PF3D7_1369000	PcyM_1102200	PCYB_111150	glycosylphosphatidylinositol anchor attachment 1 protein, putative	FALSE
PVP01_1209000	conserved Plasmodium protein, unknown function	OG0004491	5	PBANKA_1358700	PF3D7_1345800	PcyM_1210600	PCYB_121790	conserved Plasmodium protein, unknown function	FALSE
PVP01_0735700	PIR protein	NA	NA	NA	NA	NA	NA	NA	FALSE
PVP01_1211100	kelch protein K13, putative	OG0002815	5	PBANKA_1356700	PF3D7_1343700	PcyM_1212800	PCYB_122000	kelch protein K13	FALSE
PVP01_1402300	Plasmodium exported protein, unknown function	OG0005229	3	NA	NA	PcyM_1402900	PCYB_141080	NA	FALSE
PVP01_1223300	signal peptidase complex catalytic subunit SEC11, putative	OG0002757	5	PBANKA_1346200	PF3D7_1331300	PcyM_1226200	PCYB_123130	signal peptidase complex catalytic subunit SEC11	FALSE
PVP01_0307100	protein CINCH, putative	OG0003903	5	PBANKA_1005400	PF3D7_0407800	PcyM_0310200	PCYB_031550	protein CINCH	FALSE
PVP01_0731400	conserved Plasmodium protein, unknown function	OG0003739	5	PBANKA_0833500	PF3D7_0932700	PcyM_0734200	PCYB_074020	conserved Plasmodium protein, unknown function	FALSE
PVP01_0600800	PIR protein	NA	NA	NA	NA	NA	NA	NA	FALSE
PVP01_1034100	Plasmodium exported protein, unknown function	NA	NA	NA	NA	NA	NA	NA	FALSE
PVP01_0008920	PIR protein	NA	NA	NA	NA	NA	NA	NA	FALSE
PVP01_0623100	Plasmodium exported protein, unknown function	OG0005208	3	NA	NA	PcyM_0628100	PCYB_063210	NA	FALSE
PVP01_0010620	PIR protein	NA	NA	NA	NA	NA	NA	NA	FALSE
PVP01_0943200	60S ribosomal protein L28, putative	OG0003767	5	PBANKA_0906500	PF3D7_1142500	PcyM_0947150	PCYB_094800	60S ribosomal protein L28	FALSE
PVP01_1338200	conserved protein, unknown function	OG0003989	5	PBANKA_1031800	PF3D7_1410700	PcyM_1344800	PCYB_134600	conserved protein, unknown function	FALSE
PVP01_1274400	PIR protein	NA	NA	NA	NA	NA	NA	NA	FALSE
PVP01_0931500	structural maintenance of chromosomes protein 1, putative	OG0001642	5	PBANKA_0917500	PF3D7_1130700	PcyM_0935400	PCYB_093670	structural maintenance of chromosomes protein 1, putative	FALSE
PVP01_1021800	glutathione synthetase, putative	OG0002063	5	PBANKA_1111800	PF3D7_0512200	PcyM_1020900	PCYB_102950	glutathione synthetase	FALSE
PVP01_0119700	VIR protein, pseudogene	NA	NA	NA	NA	NA	NA	NA	FALSE
PVP01_0522600	conserved Plasmodium protein, unknown function	OG0005204	3	NA	NA	PcyM_0524400	PCYB_052920	NA	FALSE
PVP01_0610800	cytochrome c oxidase copper chaperone, putative	OG0001054	5	PBANKA_0509800	PF3D7_1025600	PcyM_0613700	PCYB_061990	cytochrome c oxidase copper chaperone, putative	FALSE
PVP01_1008600	structural maintenance of chromosomes protein 6, putative	OG0002480	5	PBANKA_1240000	PF3D7_0525200	PcyM_1006400	PCYB_101640	structural maintenance of chromosomes protein 6, putative	TRUE
PVP01_0609000	conserved Plasmodium protein, unknown function	OG0003437	5	PBANKA_0508000	PF3D7_1023800	PcyM_0611200	PCYB_061810	conserved Plasmodium protein, unknown function	TRUE
PVP01_1417600	conserved protein, unknown function	OG0002943	5	PBANKA_1415200	PF3D7_1316700	PcyM_1418400	PCYB_142600	conserved protein, unknown function	FALSE
PVP01_0830100	calcium-dependent protein kinase 3, putative	OG0000957	5	PBANKA_0408200	PF3D7_0310100	PcyM_0833600	PCYB_083940	calcium-dependent protein kinase 3	FALSE
PVP01_1243900	AAA ATPase, putative	OG0004377	5	PBANKA_1326500	PF3D7_1462900	PcyM_1249900	PCYB_125220	AAA ATPase, putative	FALSE
PVP01_1034600	PIR protein	OG0005527	2	NA	NA	NA	PCYB_104260	NA	FALSE
PVP01_1448400	vacuolar transporter chaperone, putative	OG0004651	4	PBANKA_1444900	NA	PcyM_1452600	PCYB_145580	NA	FALSE
PVP01_0415400	conserved protein, unknown function	OG0000856	5	PBANKA_0306500	PF3D7_0209400	PcyM_0413800	PCYB_042050	conserved protein, unknown function	FALSE
PVP01_1262800	calmodulin-like protein	OG0000560	5	PBANKA_1308100	PF3D7_1444200	PcyM_1271600	PCYB_127090	calmodulin-like protein	FALSE
PVP01_1220400	MSP7-like protein	NA	NA	NA	NA	NA	NA	NA	FALSE
PVP01_1242700	conserved Plasmodium protein, unknown function	OG0004380	5	PBANKA_1327500	PF3D7_1464100	PcyM_1248700	PCYB_125090	conserved Plasmodium protein, unknown function	FALSE
PVP01_1200500	PIR protein	NA	NA	NA	NA	NA	NA	NA	FALSE
PVP01_1468900	conserved Plasmodium protein, unknown function	OG0004715	5	PBANKA_1464800	PF3D7_1251800	PcyM_1475900	PCYB_147620	conserved Plasmodium protein, unknown function	TRUE
PVP01_1268100	thioredoxin peroxidase 1, putative	OG0002526	5	PBANKA_1302800	PF3D7_1438900	PcyM_1277200	PCYB_127620	thioredoxin peroxidase 1	TRUE
PVP01_1438600	conserved Plasmodium protein, unknown function	OG0004621	4	PBANKA_1435400	NA	PcyM_1440300	PCYB_144600	NA	FALSE
PVP01_0620400	conserved Plasmodium protein, unknown function	OG0004856	3	NA	NA	PcyM_0625300	PCYB_062960	NA	FALSE
PVP01_1310800	lysine-specific histone demethylase 1, putative	OG0001183	5	PBANKA_0610100	PF3D7_1211600	PcyM_1312500	PCYB_132030	lysine-specific histone demethylase 1, putative	FALSE
PVP01_1243300	fam-a protein	OG0004989	4	NA	PF3D7_1463500	PcyM_1249300	PCYB_125150	fam-a protein	FALSE
PVP01_1242100	vacuolar ATP synthase subunit d, putative	OG0002663	5	PBANKA_1328100	PF3D7_1464700	PcyM_1248100	PCYB_125030	ATP synthase (C/AC39) subunit, putative	TRUE
PVP01_0610200	Eps15-like protein, putative	OG0001051	5	PBANKA_0509200	PF3D7_1025000	PcyM_0612500	PCYB_061930	Eps15-like protein	TRUE
PVP01_1323400	conserved Plasmodium protein, unknown function	OG0004798	5	PBANKA_1018700	PF3D7_1425900	PcyM_1327200	PCYB_133250	conserved Plasmodium protein, unknown function	FALSE
PVP01_0403200	PIR protein	NA	NA	NA	NA	NA	NA	NA	FALSE
PVP01_1423100	histone H2B variant, putative	NA	NA	NA	NA	NA	NA	NA	TRUE
PVP01_1022200	inositol-3-phosphate synthase, putative	OG0004047	5	PBANKA_1111400	PF3D7_0511800	PcyM_1021300	PCYB_102990	inositol-3-phosphate synthase	TRUE
PVP01_1425000	cation diffusion facilitator family protein, putative	OG0002987	5	PBANKA_1422200	PF3D7_0715900	PcyM_1426100	PCYB_143290	cation diffusion facilitator family protein, putative	FALSE
PVP01_0620000	methionine--tRNA ligase, putative	OG0000399	5	PBANKA_0518700	PF3D7_1034900	PcyM_0624900	PCYB_062920	methionine--tRNA ligase	TRUE
PVP01_0522800	Plasmodium exported protein (PHIST), unknown function	OG0005511	3	NA	NA	PcyM_0524600	PCYB_052940	NA	FALSE
PVP01_0004540	PIR protein	NA	NA	NA	NA	NA	NA	NA	FALSE
PVP01_1421000	TBC domain protein, putative	OG0002964	5	PBANKA_1418500	PF3D7_1320200	PcyM_1422000	PCYB_142930	TBC domain protein, putative	FALSE
PVP01_0309400	tRNA Serine	NA	NA	NA	NA	NA	NA	NA	FALSE
PVP01_0009420	PIR protein	NA	NA	NA	NA	NA	NA	NA	FALSE
PVP01_API02700	apicoplast ribosomal protein S7, putative	OG0003230	4	PBANKA_API00290	PF3D7_API02800	PcyM_API02000	NA	apicoplast ribosomal protein S7	FALSE
PVP01_1107500	exosome complex component RRP45, putative	OG0002221	5	PBANKA_1140400	PF3D7_1364500	PcyM_1106800	PCYB_111610	exosome complex component RRP45, putative	FALSE
PVP01_0103100	centrin, putative	OG0001384	5	PBANKA_0800600	PF3D7_0702900	PcyM_0103200	PCYB_011030	centrin, putative	FALSE
PVP01_0301800	Plasmodium exported protein, unknown function	NA	NA	NA	NA	NA	NA	NA	FALSE
PVP01_1308900	ATP synthase mitochondrial F1 complex assembly factor 1, putative	OG0001173	5	PBANKA_0608200	PF3D7_1209800	PcyM_1310400	PCYB_131840	ATP synthase mitochondrial F1 complex assembly factor 1, putative	FALSE
PVP01_0732400	conserved Plasmodium protein, unknown function	OG0003743	5	PBANKA_0834500	PF3D7_0933700	PcyM_0735600	PCYB_074110	conserved Plasmodium protein, unknown function	FALSE
PVP01_0521400	armadillo-domain containing rhoptry protein, putative	OG0001353	5	PBANKA_0716900	PF3D7_0414900	PcyM_0522950	PCYB_052800	armadillo-domain containing rhoptry protein	TRUE
PVP01_0108200	cytoskeleton associated protein, putative	OG0001403	5	PBANKA_0805200	PF3D7_0708000	PcyM_0108900	PCYB_011500	cytoskeleton associated protein, putative	FALSE
PVP01_0009710	PIR protein	NA	NA	NA	NA	NA	NA	NA	FALSE
PVP01_1004500	conserved Plasmodium protein, unknown function	OG0002502	5	PBANKA_1243900	PF3D7_0529400	PcyM_1002200	PCYB_101240	conserved Plasmodium protein, unknown function	TRUE
PVP01_0423600	Plasmodium exported protein (PHIST), unknown function	OG0005201	3	NA	NA	PcyM_0423600	PCYB_042860	NA	FALSE
PVP01_0003610	PIR protein	NA	NA	NA	NA	NA	NA	NA	FALSE
PVP01_1217700	mitochondrial intermediate peptidase, putative	OG0002779	5	PBANKA_1350800	PF3D7_1337000	PcyM_1220400	PCYB_122580	mitochondrial intermediate peptidase, putative	FALSE
PVP01_1221700	20 kDa chaperonin, putative	OG0002770	5	PBANKA_1347800	PF3D7_1333000	PcyM_1224500	PCYB_122970	20 kDa chaperonin	FALSE
PVP01_1462600	conserved Plasmodium protein, unknown function	OG0004697	5	PBANKA_1458700	PF3D7_1245500	PcyM_1468900	PCYB_147000	conserved Plasmodium protein, unknown function	FALSE
PVP01_1132700	conserved Plasmodium protein, unknown function	OG0004063	5	PBANKA_1115900	PF3D7_0616400	PcyM_1134200	PCYB_114070	conserved Plasmodium protein, unknown function	TRUE
PVP01_1440700	diphthine--ammonia ligase, putative	OG0003077	5	PBANKA_1437400	PF3D7_1222500	PcyM_1442500	PCYB_144820	diphthine--ammonia ligase, putative	FALSE
PVP01_1121900	conserved Plasmodium protein, unknown function	OG0004099	5	PBANKA_1126300	PF3D7_0627600	PcyM_1122600	PCYB_113040	conserved Plasmodium protein, unknown function	FALSE
PVP01_1104000	conserved protein, unknown function	OG0002244	5	PBANKA_1143900	PF3D7_1368000	PcyM_1103200	PCYB_111250	conserved protein, unknown function	FALSE
PVP01_1028800	actin-like protein, putative	OG0004025	5	PBANKA_1104800	PF3D7_0505200	PcyM_1028900	PCYB_103640	actin-like protein, putative	FALSE
PVP01_0710500	conserved Plasmodium protein, unknown function	OG0003669	5	PBANKA_0813100	PF3D7_0912000	PcyM_0710300	PCYB_071980	conserved Plasmodium protein, unknown function	TRUE
PVP01_1425200	importin subunit beta, putative	OG0002989	5	PBANKA_1422400	PF3D7_0815200	PcyM_1426400	PCYB_143310	importin subunit beta, putative	FALSE
PVP01_0007650	PIR protein	NA	NA	NA	NA	NA	NA	NA	FALSE
PVP01_1273600	Plasmodium exported protein, unknown function	NA	NA	NA	NA	NA	NA	NA	FALSE
PVP01_0737300	PIR protein	NA	NA	NA	NA	NA	NA	NA	FALSE
PVP01_0008590	PIR protein	NA	NA	NA	NA	NA	NA	NA	FALSE
PVP01_0613200	protoporphyrinogen oxidase, putative	OG0001067	5	PBANKA_0512200	PF3D7_1028100	PcyM_0616500	PCYB_062220	protoporphyrinogen oxidase	FALSE
PVP01_1212800	40S ribosomal protein S6, putative	OG0002807	5	PBANKA_1355100	PF3D7_1342000	PcyM_1214800	PCYB_122160	40S ribosomal protein S6	TRUE
PVP01_0530700	erythrocyte membrane-associated antigen, putative	OG0001122	5	PBANKA_0522600	PF3D7_0422200	PcyM_0531800	PCYB_053560	erythrocyte membrane-associated antigen	FALSE
PVP01_0522400	60S ribosomal protein L15, putative	OG0001360	5	PBANKA_0717800	PF3D7_0415900	PcyM_0524100	PCYB_052900	60S ribosomal protein L15, putative	TRUE
PVP01_0718900	ADP-ribosylation factor, putative	OG0001493	5	PBANKA_0821400	PF3D7_0920500	PcyM_0719200	PCYB_072800	ADP-ribosylation factor, putative	FALSE
PVP01_0002090	PIR protein	NA	NA	NA	NA	NA	NA	NA	FALSE
PVP01_0007640	PIR protein	NA	NA	NA	NA	NA	NA	NA	FALSE
PVP01_0203700	UMP-CMP kinase, putative	OG0000750	5	PBANKA_0202300	PF3D7_0111500	PcyM_0205000	PCYB_021300	UMP-CMP kinase, putative	FALSE
PVP01_0005740	PIR protein	OG0005549	3	NA	NA	PcyM_1355400	PCYB_002910	NA	FALSE
PVP01_0716200	conserved Plasmodium protein, unknown function	OG0003688	5	PBANKA_0818800	PF3D7_0917800	PcyM_0716100	PCYB_072540	conserved Plasmodium protein, unknown function	FALSE
PVP01_1203000	conserved Plasmodium protein, unknown function	OG0002853	5	PBANKA_1364500	PF3D7_1351800	PcyM_1204300	PCYB_121200	conserved Plasmodium protein, unknown function	TRUE
PVP01_1211800	phosphoethanolamine N-methyltransferase	OG0004986	4	NA	PF3D7_1343000	PcyM_1213600	PCYB_122070	phosphoethanolamine N-methyltransferase	TRUE
PVP01_1022300	EKC/KEOPS complex subunit CGI121, putative	OG0002060	5	PBANKA_1111300	PF3D7_0511700	PcyM_1021400	PCYB_103000	EKC/KEOPS complex subunit CGI121	FALSE
PVP01_1316100	PHD finger protein PHD2, putative	OG0003922	5	PBANKA_1011500	PF3D7_1433400	PcyM_1318300	PCYB_132550	PHD finger protein PHD2, putative	TRUE
PVP01_1245700	conserved Plasmodium protein, unknown function	OG0002648	5	PBANKA_1324800	PF3D7_1461100	PcyM_1252000	PCYB_125390	conserved Plasmodium protein, unknown function	FALSE
PVP01_0518800	small heat shock protein HSP20, putative	OG0000421	5	PBANKA_0714300	PF3D7_0816500	PcyM_0519700	PCYB_052530	small heat shock protein HSP20, putative	FALSE
PVP01_0112800	conserved Plasmodium protein, unknown function	OG0004231	5	PBANKA_1223000	PF3D7_0807600	PcyM_0113900	PCYB_011960	conserved Plasmodium protein, unknown function	FALSE
PVP01_0000120	tryptophan-rich protein	OG0005240	3	NA	NA	PcyM_0013200	PCYB_001970	NA	FALSE
PVP01_0304000	conserved Plasmodium protein, unknown function	OG0003889	5	PBANKA_1002300	PF3D7_0404600	PcyM_0306700	PCYB_031240	conserved Plasmodium membrane protein, unknown function	FALSE
PVP01_1113100	40S ribosomal protein S15, putative	OG0002191	5	PBANKA_1135100	PF3D7_1358800	PcyM_1112800	PCYB_112180	40S ribosomal protein S15	FALSE
PVP01_0004020	PIR protein	NA	NA	NA	NA	NA	NA	NA	FALSE
PVP01_1260900	conserved Plasmodium protein, unknown function	OG0002560	5	PBANKA_1309800	PF3D7_1446100	PcyM_1269700	PCYB_126900	conserved Plasmodium protein, unknown function	FALSE
PVP01_0106900	DNA mismatch repair protein MSH2, putative	OG0001398	5	PBANKA_0804300	PF3D7_0706700	PcyM_0107600	PCYB_011410	DNA mismatch repair protein MSH2, putative	FALSE
PVP01_1258600	ubiquitin-protein ligase, putative	OG0002574	5	PBANKA_1312200	PF3D7_1448400	PcyM_1267000	PCYB_126660	ubiquitin-protein ligase, putative	FALSE
PVP01_1430600	RuvB-like helicase 1, putative	OG0000618	5	PBANKA_1427700	PF3D7_0809700	PcyM_1432000	PCYB_143850	RuvB-like helicase 1	FALSE
PVP01_1264700	tRNA import protein tRIP	OG0002544	5	PBANKA_1306200	PF3D7_1442300	PcyM_1273600	PCYB_127280	tRNA import protein tRIP	TRUE
PVP01_1267900	DEAD/DEAH box helicase, putative	OG0002528	5	PBANKA_1303000	PF3D7_1439100	PcyM_1277000	PCYB_127600	DEAD/DEAH box helicase, putative	FALSE
PVP01_0935000	conserved Plasmodium protein, unknown function	OG0003798	5	PBANKA_0914200	PF3D7_1134200	PcyM_0939000	PCYB_094010	conserved Plasmodium protein, unknown function	FALSE
PVP01_0535200	Plasmodium exported protein, unknown function	NA	NA	NA	NA	NA	NA	NA	FALSE
PVP01_0403400	PIR protein	NA	NA	NA	NA	NA	NA	NA	FALSE
PVP01_0524600	Plasmodium exported protein (PHIST), unknown function	NA	NA	NA	NA	NA	NA	NA	FALSE
PVP01_0418200	conserved Plasmodium protein, unknown function	OG0003323	5	PBANKA_0304500	PF3D7_0207100	PcyM_0417700	PCYB_042330	conserved Plasmodium protein, unknown function	TRUE
PVP01_0000030	STP1 protein	NA	NA	NA	NA	NA	NA	NA	TRUE
PVP01_1140700	heptatricopeptide repeat-containing protein, putative	OG0003263	5	PBANKA_0106900	PF3D7_0608300	PcyM_1143700	PCYB_114820	heptatricopeptide repeat-containing protein, putative	FALSE
PVP01_0002600	Plasmodium exported protein, unknown function	NA	NA	NA	NA	NA	NA	NA	FALSE
PVP01_1228900	conserved Plasmodium protein, unknown function	OG0004424	5	PBANKA_1340800	PF3D7_1325700	PcyM_1233300	PCYB_123710	conserved Plasmodium protein, unknown function	FALSE
PVP01_0415700	patatin-like phospholipase 1, putative	OG0000853	5	PBANKA_0306200	PF3D7_0209100	PcyM_0414100	PCYB_042080	patatin-like phospholipase 1	TRUE
PVP01_1033800	tryptophan-rich protein	NA	NA	NA	NA	NA	NA	NA	FALSE
PVP01_1333000	zinc finger protein, putative	OG0001934	5	PBANKA_1026800	PF3D7_1415900	PcyM_1338700	PCYB_134080	zinc finger protein, putative	FALSE
PVP01_0514500	conserved Plasmodium protein, unknown function	OG0003576	5	PBANKA_0711000	PF3D7_0819800	PcyM_0514300	PCYB_052140	conserved Plasmodium protein, unknown function	FALSE
PVP01_1231200	60S ribosomal protein L23, putative	OG0002726	5	PBANKA_1338600	PF3D7_1323400	PcyM_1235900	PCYB_123940	60S ribosomal protein L23	FALSE
PVP01_0105500	origin recognition complex subunit 2, putative	OG0001390	5	PBANKA_0803000	PF3D7_0705300	PcyM_0105900	PCYB_011270	origin recognition complex subunit 2	TRUE
PVP01_1237200	acetyl-CoA carboxylase, putative	OG0000326	5	PBANKA_1332800	PF3D7_1469600	PcyM_1242600	PCYB_124540	acetyl-CoA carboxylase	FALSE
PVP01_0708200	FHA domain protein, putative	OG0001432	5	PBANKA_0810900	PF3D7_0909700	PcyM_0708000	PCYB_071750	FHA domain protein, putative	FALSE
PVP01_0800500	PIR protein	NA	NA	NA	NA	NA	NA	NA	FALSE
PVP01_0110300	hydrolase, putative	OG0002364	5	PBANKA_1220500	PF3D7_0709900	PcyM_0111300	PCYB_011710	hydrolase, putative	TRUE
PVP01_1416300	zinc finger (CCCH type) protein, putative	OG0002935	5	PBANKA_1413900	PF3D7_1315400	PcyM_1417100	PCYB_142480	zinc finger (CCCH type) protein, putative	TRUE
PVP01_0716700	eukaryotic translation initiation factor 3 subunit F, putative	OG0001481	5	PBANKA_0819300	PF3D7_0918300	PcyM_0716600	PCYB_072590	eukaryotic translation initiation factor 3 subunit F, putative	FALSE
PVP01_1439700	inner membrane complex protein 1h, putative	OG0003071	5	PBANKA_1436600	PF3D7_1221400	PcyM_1441500	PCYB_144720	inner membrane complex protein 1h, putative	FALSE
PVP01_1423700	conserved protein, unknown function	OG0002980	5	PBANKA_1421200	PF3D7_0714600	PcyM_1424800	PCYB_143200	conserved protein, unknown function	FALSE
PVP01_1120500	glucosamine 6-phosphate N-acetyltransferase, putative	NA	NA	NA	NA	NA	NA	NA	FALSE
PVP01_0006250	Plasmodium exported protein, unknown function	NA	NA	NA	NA	NA	NA	NA	FALSE
PVP01_1108700	50S ribosomal protein L9, mitochondrial, putative	OG0004137	5	PBANKA_1139300	PF3D7_1363300	PcyM_1108100	PCYB_111730	50S ribosomal protein L9, mitochondrial, putative	FALSE
PVP01_0915600	filamin domain-containing protein, putative	OG0001741	5	PBANKA_0932800	PF3D7_1114900	PcyM_0917200	PCYB_092110	filamin domain-containing protein, putative	FALSE
PVP01_0511300	serine/threonine protein kinase VPS15, putative	OG0001301	5	PBANKA_0707600	PF3D7_0823000	PcyM_0510700	PCYB_051820	serine/threonine protein kinase VPS15, putative	TRUE
PVP01_1138600	peptidyl-tRNA hydrolase PTRHD1, putative	OG0000727	5	PBANKA_0108900	PF3D7_0610500	PcyM_1140900	PCYB_114620	peptidyl-tRNA hydrolase PTRHD1, putative	FALSE
PVP01_1222200	SAM-dependent RNA methyltransferase, putative	OG0002765	5	PBANKA_1347300	PF3D7_1332500	PcyM_1225100	PCYB_123020	SAM-dependent RNA methyltransferase, putative	FALSE
PVP01_0511600	thrombospondin-related protein 1, putative	OG0000254	5	PBANKA_0707900	PF3D7_0822700	PcyM_0511000	PCYB_051850	thrombospondin-related protein 1, putative	FALSE
PVP01_1412200	alternative splicing regulator, putative	OG0002905	5	PBANKA_1409700	PF3D7_1311200	PcyM_1412900	PCYB_142070	alternative splicing regulator, putative	FALSE
PVP01_1410100	60S ribosomal protein L24, putative	OG0002892	5	PBANKA_1407600	PF3D7_1309100	PcyM_1410700	PCYB_141860	60S ribosomal protein L24, putative	FALSE
PVP01_1217400	exonuclease, putative	OG0002782	5	PBANKA_1351100	PF3D7_1337300	PcyM_1220100	PCYB_122550	exoribonuclease, putative	FALSE
PVP01_1144500	conserved protein, unknown function	OG0003252	5	PBANKA_0103200	PF3D7_0604400	PcyM_1147600	PCYB_115200	conserved protein, unknown function	FALSE
PVP01_0110800	DNA repair protein RAD14, putative	OG0004223	5	PBANKA_1221000	PF3D7_0710400	PcyM_0111900	PCYB_011760	DNA repair protein RAD14, putative	FALSE
PVP01_1034000	Plasmodium exported protein (PHIST), unknown function	NA	NA	NA	NA	NA	NA	NA	FALSE
PVP01_1006900	transmembrane emp24 domain-containing protein, putative	OG0002488	5	PBANKA_1241700	PF3D7_0526900	PcyM_1004700	PCYB_101460	transmembrane emp24 domain-containing protein, putative	FALSE
PVP01_0703400	conserved Plasmodium protein, unknown function	OG0003409	5	PBANKA_0416400	PF3D7_0905000	PcyM_0702700	PCYB_071280	conserved Plasmodium protein, unknown function	FALSE
PVP01_0832700	spindle and kinetochore-associated protein 2, putative	OG0000943	5	PBANKA_0405800	PF3D7_0307500	PcyM_0836700	PCYB_084180	spindle and kinetochore-associated protein 2, putative	TRUE
PVP01_0721300	conserved Plasmodium protein, unknown function	OG0003705	5	PBANKA_0823700	PF3D7_0922800	PcyM_0721600	PCYB_073040	conserved Plasmodium protein, unknown function	FALSE
PVP01_0213800	anaphase-promoting complex subunit 1, putative	OG0000809	5	PBANKA_0212200	PF3D7_0728100	PcyM_0217300	PCYB_022300	anaphase-promoting complex subunit 1, putative	FALSE
PVP01_1124400	sphingomyelin synthase 2, putative	NA	NA	NA	NA	NA	NA	NA	TRUE
PVP01_1003900	conserved Plasmodium protein, unknown function	OG0004819	5	PBANKA_1244400	PF3D7_0530000	PcyM_1001600	PCYB_101190	conserved Plasmodium protein, unknown function	TRUE
PVP01_0103500	conserved Plasmodium protein, unknown function	OG0003619	5	PBANKA_0801000	PF3D7_0703300	PcyM_0103600	PCYB_011070	conserved Plasmodium protein, unknown function	TRUE
PVP01_0318400	conserved protein, unknown function	OG0001241	5	PBANKA_0620200	PF3D7_0722700	PcyM_0323000	PCYB_032650	conserved protein, unknown function	TRUE
PVP01_1341900	glideosome associated protein with multiple membrane spans 3, putative	OG0001980	5	PBANKA_1035400	PF3D7_1406800	PcyM_1349200	PCYB_134960	glideosome associated protein with multiple membrane spans 3	FALSE
PVP01_1245300	meiotic nuclear division protein 1, putative	OG0002651	5	PBANKA_1325200	PF3D7_1461500	PcyM_1251400	PCYB_125350	meiotic nuclear division protein 1, putative	TRUE
PVP01_1234500	conserved protein, unknown function	OG0002705	5	PBANKA_1335500	PF3D7_1472300	PcyM_1239600	PCYB_124270	conserved protein, unknown function	TRUE
PVP01_1214100	ras-related protein Rab-11B, putative	OG0002798	5	PBANKA_1354100	PF3D7_1340700	PcyM_1216100	PCYB_122260	ras-related protein Rab-11B	FALSE
PVP01_0713000	transcription elongation factor 1, putative	OG0001463	5	PBANKA_0815600	PF3D7_0914600	PcyM_0712800	PCYB_072220	transcription elongation factor 1, putative	TRUE
PVP01_0941900	ATP synthase-associated protein, putative	OG0001598	5	PBANKA_0907800	PF3D7_1141200	PcyM_0945900	PCYB_094670	ATP synthase-associated protein, putative	FALSE
PVP01_0935700	conserved Plasmodium protein, unknown function	OG0003796	5	PBANKA_0913600	PF3D7_1134900	PcyM_0939800	PCYB_094080	conserved Plasmodium protein, unknown function	FALSE
PVP01_1327600	conserved Plasmodium protein, unknown function	OG0005002	4	NA	PF3D7_1421300	PcyM_1332400	PCYB_133590	conserved Plasmodium protein, unknown function	FALSE
PVP01_0010130	PIR protein	NA	NA	NA	NA	NA	NA	NA	FALSE
PVP01_0730200	conserved Plasmodium protein, unknown function	OG0003736	5	PBANKA_0832300	PF3D7_0931500	PcyM_0732600	PCYB_073900	conserved Plasmodium protein, unknown function	TRUE
PVP01_0000670	PIR protein	NA	NA	NA	NA	NA	NA	NA	FALSE
PVP01_0311400	LITAF-like zinc finger protein, putative	OG0001198	5	PBANKA_0613300	PF3D7_0412000	PcyM_0314800	PCYB_031940	LITAF-like zinc finger protein, putative	FALSE
PVP01_0113700	protein tyrosine phosphatase, putative	OG0004815	4	PBANKA_1223900	NA	PcyM_0115200	PCYB_012050	NA	TRUE
PVP01_0619900	conserved protein, unknown function	OG0001106	5	PBANKA_0518600	PF3D7_1034800	PcyM_0624800	PCYB_062910	conserved protein, unknown function	TRUE
PVP01_0003660	PIR protein	NA	NA	NA	NA	NA	NA	NA	FALSE
PVP01_1422700	ribosomal protein S5, mitochondrial, putative	OG0002974	5	PBANKA_1420200	PF3D7_0713600	PcyM_1423700	PCYB_143100	ribosomal protein S5, mitochondrial, putative	TRUE
PVP01_1023900	KH domain-containing protein, putative	OG0004041	5	PBANKA_1109700	PF3D7_0510100	PcyM_1023200	PCYB_103150	KH domain-containing protein, putative	TRUE
PVP01_0214100	SDH5 domain-containing protein, putative	OG0003306	5	PBANKA_0212500	PF3D7_0728400	PcyM_0217600	PCYB_022330	SDH5 domain-containing protein, putative	FALSE
PVP01_0933200	conserved Plasmodium protein, unknown function	OG0001635	5	PBANKA_0916000	PF3D7_1132400	PcyM_0937300	PCYB_093840	conserved Plasmodium membrane protein, unknown function	TRUE
PVP01_0506000	mitochondrial inner membrane protein OXA1, putative	OG0001267	5	PBANKA_0702300	PF3D7_0828400	PcyM_0504800	PCYB_051290	mitochondrial inner membrane protein OXA1, putative	FALSE
PVP01_0007270	Plasmodium exported protein, unknown function, pseudogene	NA	NA	NA	NA	NA	NA	NA	FALSE
PVP01_1232000	conserved Plasmodium protein, unknown function	OG0005115	4	NA	PF3D7_1322600	PcyM_1236800	PCYB_124020	conserved Plasmodium protein, unknown function	FALSE
PVP01_0624900	PIR protein	NA	NA	NA	NA	NA	NA	NA	FALSE
PVP01_0002940	PIR protein	NA	NA	NA	NA	NA	NA	NA	FALSE
PVP01_1231600	beta-hydroxyacyl-ACP dehydratase, putative	OG0002722	5	PBANKA_1338200	PF3D7_1323000	PcyM_1236400	PCYB_123980	beta-hydroxyacyl-ACP dehydratase	FALSE
PVP01_0413600	oxoacyl-ACP synthase, putative	OG0000864	5	PBANKA_0308200	PF3D7_0211400	PcyM_0411700	PCYB_041870	beta-ketoacyl-ACP synthase III	FALSE
PVP01_0007060	Plasmodium exported protein, unknown function, pseudogene	NA	NA	NA	NA	NA	NA	NA	FALSE
PVP01_0001010	PIR protein	NA	NA	NA	NA	NA	NA	NA	FALSE
PVP01_0910500	small nucleolar RNA snoR11	NA	NA	NA	NA	NA	NA	NA	FALSE
PVP01_0002450	Plasmodium exported protein, unknown function	NA	NA	NA	NA	NA	NA	NA	FALSE
PVP01_0006530	Plasmodium exported protein, unknown function	NA	NA	NA	NA	NA	NA	NA	FALSE
PVP01_1429200	mitochondrial carrier protein, putative	OG0003015	5	PBANKA_1426400	PF3D7_0811100	PcyM_1430500	PCYB_143710	mitochondrial carrier protein, putative	FALSE
PVP01_0614400	conserved protein, unknown function	OG0001071	5	PBANKA_0513300	PF3D7_1029300	PcyM_0618000	PCYB_062350	conserved protein, unknown function	FALSE
PVP01_1137400	conserved Plasmodium protein, unknown function	OG0005341	3	NA	NA	PcyM_1139500	PCYB_114520	NA	TRUE
PVP01_1264500	geranylgeranyl transferase type-2 subunit alpha, putative	OG0002545	5	PBANKA_1306400	PF3D7_1442500	PcyM_1273400	PCYB_127260	geranylgeranyl transferase type-2 subunit alpha, putative	FALSE
PVP01_0917200	dolichyl-diphosphooligosaccharide--protein glycosyltransferase subunit STT3, putative	OG0001733	5	PBANKA_0931400	PF3D7_1116600	PcyM_0919100	PCYB_092270	dolichyl-diphosphooligosaccharide--protein glycosyltransferase subunit STT3, putative	FALSE
PVP01_0618600	WD repeat-containing protein 70, putative	OG0001095	5	PBANKA_0517300	PF3D7_1033500	PcyM_0623000	PCYB_062780	WD repeat-containing protein 70, putative	FALSE
PVP01_0002860	PIR protein	NA	NA	NA	NA	NA	NA	NA	FALSE
PVP01_0304500	protein transport protein Sec24B, putative	OG0001809	5	PBANKA_1002800	PF3D7_0405100	PcyM_0307200	PCYB_031290	protein transport protein Sec24B, putative	FALSE
PVP01_1219000	WD repeat-containing protein, putative	OG0004459	5	PBANKA_1349500	PF3D7_1335600	PcyM_1221700	PCYB_122710	WD repeat-containing protein, putative	FALSE
PVP01_0105800	RNA helicase, putative	OG0000426	5	PBANKA_0803300	PF3D7_0705600	PcyM_0106200	PCYB_011300	RNA helicase, putative	FALSE
PVP01_0001960	PIR protein	OG0005556	3	NA	NA	PcyM_0960500	PCYB_004720	NA	FALSE
PVP01_0834500	ubiquitin-conjugating enzyme E2, putative	OG0000931	5	PBANKA_0404200	PF3D7_0305700	PcyM_0838500	PCYB_084350	ubiquitin-conjugating enzyme E2, putative	FALSE
PVP01_0011160	PIR protein	NA	NA	NA	NA	NA	NA	NA	FALSE
PVP01_0819200	conserved protein, unknown function	OG0004213	5	PBANKA_1217500	PF3D7_0321000	PcyM_0820700	PCYB_082880	conserved protein, unknown function	FALSE
PVP01_0423200	Plasmodium exported protein (PHIST), unknown function	NA	NA	NA	NA	NA	NA	NA	FALSE
PVP01_0502600	PIR protein	OG0005508	3	NA	NA	PcyM_0501400	PCYB_051010	NA	FALSE
PVP01_0116300	cactin homolog, putative	OG0002394	5	PBANKA_1226400	PF3D7_0804000	PcyM_0118500	PCYB_012300	cactin homolog, putative	FALSE
PVP01_0709800	cysteine repeat modular protein 1, putative	OG0003664	5	PBANKA_0812400	PF3D7_0911300	PcyM_0709600	PCYB_071910	cysteine repeat modular protein 1	FALSE
PVP01_0602100	early transcribed membrane protein	OG0004964	4	NA	PF3D7_1016900	PcyM_0602100	PCYB_061120	early transcribed membrane protein 10.3	TRUE
PVP01_1013400	phosphomethylpyrimidine kinase, putative	OG0004975	4	NA	PF3D7_0520500	PcyM_1011300	PCYB_102130	phosphomethylpyrimidine kinase, putative	FALSE
PVP01_0726100	RNA-binding protein, putative	OG0001532	5	PBANKA_0828400	PF3D7_0927600	PcyM_0727600	PCYB_073520	RNA-binding protein, putative	TRUE
PVP01_1021100	conserved Plasmodium protein, unknown function	OG0004051	5	PBANKA_1112500	PF3D7_0512800	PcyM_1020100	PCYB_102880	conserved Plasmodium protein, unknown function	TRUE
PVP01_1238300	derlin-1, putative	OG0002686	5	PBANKA_1331800	PF3D7_1468500	PcyM_1243700	PCYB_124650	derlin-1	FALSE
PVP01_0505200	prohibitin 1, putative	OG0001260	5	PBANKA_0701500	PF3D7_0829200	PcyM_0504000	PCYB_051210	prohibitin 1, putative	FALSE
PVP01_1435800	conserved protein, unknown function	OG0004614	5	PBANKA_1432600	PF3D7_1217000	PcyM_1437300	PCYB_144330	conserved protein, unknown function	TRUE
PVP01_1319300	serine/threonine protein phosphatase 2A activator, putative	OG0001877	5	PBANKA_1014600	PF3D7_1430100	PcyM_1322300	PCYB_132860	serine/threonine protein phosphatase 2A activator	TRUE
PVP01_1143200	conserved Plasmodium protein, unknown function	OG0003256	5	PBANKA_0104500	PF3D7_0605700	PcyM_1146400	PCYB_115070	conserved Plasmodium protein, unknown function	FALSE
PVP01_1131600	histone H3 variant, putative	NA	NA	NA	NA	NA	NA	NA	TRUE
PVP01_1023400	tRNA Leucine	NA	NA	NA	NA	NA	NA	NA	FALSE
PVP01_1127400	conserved Plasmodium protein, unknown function	OG0004083	5	PBANKA_1121000	PF3D7_0622100	PcyM_1128400	PCYB_113570	conserved Plasmodium protein, unknown function	FALSE
PVP01_0926300	conserved protein, unknown function	OG0003826	4	PBANKA_0922700	PF3D7_1125600	PcyM_0929700	NA	conserved protein, unknown function	FALSE
PVP01_1300100	PIR protein, pseudogene	NA	NA	NA	NA	NA	NA	NA	FALSE
PVP01_0302800	conserved Plasmodium protein, unknown function	OG0004793	4	PBANKA_1001200	NA	PcyM_0305300	PCYB_031120	NA	FALSE
PVP01_0007050	Plasmodium exported protein, unknown function	NA	NA	NA	NA	NA	NA	NA	FALSE
PVP01_1265600	FACT complex subunit SSRP1, putative	OG0002538	5	PBANKA_1305300	PF3D7_1441400	PcyM_1274500	PCYB_127370	FACT complex subunit SSRP1, putative	FALSE
PVP01_0915000	GTPase-activating protein, putative	OG0000473	5	PBANKA_0933400	PF3D7_1114200	PcyM_0916600	PCYB_092050	GTPase-activating protein, putative	TRUE
PVP01_0009220	PIR protein	NA	NA	NA	NA	NA	NA	NA	FALSE
PVP01_1319800	conserved Plasmodium protein, unknown function	OG0003931	5	PBANKA_1015100	PF3D7_1429600	PcyM_1322800	PCYB_132910	conserved Plasmodium protein, unknown function	FALSE
PVP01_0007410	PIR protein	NA	NA	NA	NA	NA	NA	NA	FALSE
PVP01_1112900	conserved Plasmodium protein, unknown function	OG0002193	5	PBANKA_1135300	PF3D7_1359000	PcyM_1112600	PCYB_112160	conserved Plasmodium protein, unknown function	FALSE
PVP01_0218700	Plasmodium exported protein, unknown function	NA	NA	NA	NA	NA	NA	NA	FALSE
PVP01_0007320	PIR protein	NA	NA	NA	NA	NA	NA	NA	FALSE
PVP01_0715900	conserved protein, unknown function	OG0001477	5	PBANKA_0818500	PF3D7_0917500	PcyM_0715800	PCYB_072510	conserved protein, unknown function	FALSE
PVP01_0506500	protein disulfide-isomerase, putative	OG0000209	5	PBANKA_0702800	PF3D7_0827900	PcyM_0505300	PCYB_051340	protein disulfide-isomerase	FALSE
PVP01_0910000	conserved Plasmodium protein, unknown function	OG0003862	5	PBANKA_0937900	PF3D7_1109200	PcyM_0911200	PCYB_091600	conserved Plasmodium protein, unknown function	FALSE
PVP01_1264400	TRAP-like protein	OG0004315	5	PBANKA_1306500	PF3D7_1442600	PcyM_1273300	PCYB_127250	TRAP-like protein	TRUE
PVP01_0712600	phospholipid or glycerol acyltransferase, putative	OG0001460	5	PBANKA_0815200	PF3D7_0914200	PcyM_0712400	PCYB_072180	phospholipid or glycerol acyltransferase, putative	TRUE
PVP01_0417500	serine-repeat antigen (SERA), truncated	OG0005562	2	NA	NA	PcyM_0416800	NA	NA	FALSE
PVP01_0009200	PIR protein	NA	NA	NA	NA	NA	NA	NA	FALSE
PVP01_0202700	28S ribosomal RNA	NA	NA	NA	NA	NA	NA	NA	FALSE
PVP01_1266000	cytoplasmic tRNA 2-thiolation protein 2, putative	OG0002536	5	PBANKA_1304900	PF3D7_1441000	PcyM_1274900	PCYB_127410	cytoplasmic tRNA 2-thiolation protein 2, putative	FALSE
PVP01_0513200	protein kinase 1, putative	OG0003572	5	PBANKA_0709700	PF3D7_0821100	PcyM_0512900	PCYB_052010	protein kinase 1	TRUE
PVP01_1270500	bromodomain protein 4, putative	OG0002515	5	PBANKA_1300600	PF3D7_1475600	PcyM_1280000	PCYB_127840	bromodomain protein 4, putative	TRUE
PVP01_0002650	Plasmodium exported protein, unknown function	NA	NA	NA	NA	NA	NA	NA	FALSE
PVP01_0215600	dynein heavy chain, putative	OG0000821	5	PBANKA_0214000	PF3D7_0729900	PcyM_0219100	PCYB_022480	dynein heavy chain, putative	FALSE
PVP01_1127100	conserved protein, unknown function	OG0002114	5	PBANKA_1121300	PF3D7_0622400	PcyM_1128100	PCYB_113540	conserved protein, unknown function	FALSE
PVP01_1456700	sphingomyelin phosphodiesterase, putative	OG0003161	5	PBANKA_1453100	PF3D7_1238600	PcyM_1462800	PCYB_146430	sphingomyelin phosphodiesterase	FALSE
PVP01_1133700	ribonuclease, putative	OG0004817	5	PBANKA_1230100	PF3D7_0615400	PcyM_1135300	PCYB_114170	ribonuclease, putative	TRUE
PVP01_1257200	conserved protein, unknown function	OG0002584	5	PBANKA_1313500	PF3D7_1449800	PcyM_1265500	PCYB_126530	conserved protein, unknown function	FALSE
PVP01_1336000	ubiquitin-conjugating enzyme E2, putative	OG0000498	5	PBANKA_1029700	PF3D7_1412900	PcyM_1342200	PCYB_134380	ubiquitin-conjugating enzyme E2, putative	FALSE
PVP01_0831100	OMD protein, putative	OG0003378	5	PBANKA_0407300	PF3D7_0309100	PcyM_0834600	PCYB_084030	OMD protein, putative	TRUE
PVP01_0115800	conserved Plasmodium protein, unknown function	OG0005294	3	NA	NA	PcyM_0117900	PCYB_012250	NA	FALSE
PVP01_1111500	conserved Plasmodium protein, unknown function	OG0002200	5	PBANKA_1136600	PF3D7_1360400	PcyM_1111200	PCYB_112020	conserved Plasmodium protein, unknown function	FALSE
PVP01_0005620	Plasmodium exported protein, unknown function	NA	NA	NA	NA	NA	NA	NA	FALSE
PVP01_1102200	tRNA Arginine	NA	NA	NA	NA	NA	NA	NA	FALSE
PVP01_0826400	conserved Plasmodium protein, unknown function	OG0003391	5	PBANKA_0411500	PF3D7_0313800	PcyM_0828500	PCYB_083600	conserved Plasmodium protein, unknown function	FALSE
PVP01_1129400	ATP synthase-associated protein, putative	OG0002103	5	PBANKA_1119300	PF3D7_0620100	PcyM_1130500	PCYB_113740	ATP synthase-associated protein, putative	FALSE
PVP01_0313200	queuine tRNA-ribosyltransferase, putative	OG0001207	5	PBANKA_0615100	PF3D7_0717400	PcyM_0316700	PCYB_032110	queuine tRNA-ribosyltransferase, putative	FALSE
PVP01_0933000	T-complex protein 1 subunit alpha, putative	OG0001636	5	PBANKA_0916200	PF3D7_1132200	PcyM_0937100	PCYB_093820	T-complex protein 1 subunit alpha	FALSE
PVP01_0320100	mitochondrial import inner membrane translocase subunit TIM14, putative	OG0001253	5	PBANKA_0621900	PF3D7_0724400	PcyM_0325000	PCYB_032820	mitochondrial import inner membrane translocase subunit TIM14, putative	FALSE
PVP01_0003770	PIR protein	NA	NA	NA	NA	NA	NA	NA	FALSE
PVP01_1138800	RNA-binding protein 25, putative	OG0000726	5	PBANKA_0108700	PF3D7_0610200	PcyM_1141100	PCYB_114640	RNA-binding protein 25, putative	FALSE
PVP01_0531300	serpentine receptor 12, putative	OG0001126	5	PBANKA_0523200	PF3D7_0422800	PcyM_0532500	PCYB_053620	serpentine receptor 12, putative	FALSE
PVP01_0607600	serine/arginine-rich splicing factor 4, putative	OG0001037	5	PBANKA_0506600	PF3D7_1022400	PcyM_0609600	PCYB_061670	serine/arginine-rich splicing factor 4	TRUE
PVP01_1259100	multidrug resistance protein 2, putative	OG0002571	5	PBANKA_1311700	PF3D7_1447900	PcyM_1267900	PCYB_126720	multidrug resistance protein 2	TRUE
PVP01_1271300	40 kDa heat shock protein, putative	NA	NA	NA	NA	NA	NA	NA	FALSE
PVP01_1259700	ribosomal protein S14, mitochondrial, putative	OG0002567	5	PBANKA_1311100	PF3D7_1447300	PcyM_1268500	PCYB_126780	ribosomal protein S14, mitochondrial, putative	FALSE
PVP01_0809000	diphthine methyl ester synthase, putative	OG0002295	5	PBANKA_1207300	PF3D7_1009000	PcyM_0809000	PCYB_081860	diphthine methyl ester synthase, putative	FALSE
PVP01_1436200	conserved protein, unknown function	OG0003051	5	PBANKA_1433000	PF3D7_1217400	PcyM_1437700	PCYB_144370	conserved protein, unknown function	TRUE
PVP01_0009470	PIR protein	NA	NA	NA	NA	NA	NA	NA	FALSE
PVP01_1429900	aquaporin, putative	OG0004595	5	PBANKA_1427100	PF3D7_0810400	PcyM_1431300	PCYB_143780	aquaporin, putative	FALSE
PVP01_1239400	50S ribosomal protein L22, apicoplast, putative	OG0002679	5	PBANKA_1330700	PF3D7_1467400	PcyM_1245300	PCYB_124760	50S ribosomal protein L22, apicoplast, putative	FALSE
PVP01_0839300	PIR protein	NA	NA	NA	NA	NA	NA	NA	FALSE
PVP01_0003210	PIR protein	NA	NA	NA	NA	NA	NA	NA	FALSE
PVP01_1268700	tRNA Methionine	NA	NA	NA	NA	NA	NA	NA	FALSE
PVP01_1227500	conserved Plasmodium protein, unknown function	OG0004433	5	PBANKA_1342100	PF3D7_1326900	PcyM_1231400	PCYB_123570	conserved Plasmodium membrane protein, unknown function	FALSE
PVP01_0000050	PIR protein	OG0005538	3	NA	NA	PcyM_0013900	PCYB_001080	NA	FALSE
PVP01_0944900	conserved Plasmodium protein, unknown function	OG0003761	5	PBANKA_0904800	PF3D7_1144200	PcyM_0949000	PCYB_094980	conserved Plasmodium protein, unknown function	TRUE
PVP01_0840000	Plasmodium exported protein, unknown function	NA	NA	NA	NA	NA	NA	NA	FALSE
PVP01_0527900	trafficking protein particle complex subunit 3, putative	OG0001374	5	PBANKA_0720600	PF3D7_0418500	PcyM_0528600	PCYB_053280	trafficking protein particle complex subunit 3, putative	FALSE
PVP01_1455600	conserved Plasmodium protein, unknown function	OG0004677	5	PBANKA_1452100	PF3D7_1237500	PcyM_1461500	PCYB_146320	conserved Plasmodium protein, unknown function	TRUE
PVP01_1268900	translocation protein SEC62, putative	OG0002523	5	PBANKA_1302200	PF3D7_1438100	PcyM_1278000	PCYB_127680	translocation protein SEC62, putative	FALSE
PVP01_1000100	PIR protein	NA	NA	NA	NA	NA	NA	NA	FALSE
PVP01_0208300	conserved Plasmodium protein, unknown function	OG0003288	5	PBANKA_0206800	PF3D7_0106500	PcyM_0211100	PCYB_021750	conserved Plasmodium protein, unknown function	FALSE
PVP01_1002000	PIR protein	NA	NA	NA	NA	NA	NA	NA	FALSE
PVP01_0836500	lipoamide acyltransferase component of branched- chain alpha-keto acid dehydrogenase complex, putative	OG0000919	5	PBANKA_0402300	PF3D7_0303700	PcyM_0840600	PCYB_084550	lipoamide acyltransferase component of branched-chain alpha-keto acid dehydrogenase complex	FALSE
PVP01_0717300	gamma-glutamylcysteine synthetase, putative	OG0001483	5	PBANKA_0819800	PF3D7_0918900	PcyM_0717300	PCYB_072640	gamma-glutamylcysteine synthetase	TRUE
PVP01_0920600	conserved protein, unknown function	OG0001712	5	PBANKA_0928200	PF3D7_1120000	PcyM_0922900	PCYB_092610	conserved protein, unknown function	TRUE
PVP01_1135600	AP-3 complex subunit beta, putative	OG0000742	5	PBANKA_0111800	PF3D7_0613500	PcyM_1137500	PCYB_114360	AP-3 complex subunit beta, putative	FALSE
PVP01_0938300	CLPTM1 domain-containing protein, putative	OG0000459	5	PBANKA_0911400	PF3D7_1137300	PcyM_0942400	PCYB_094320	CLPTM1 domain-containing protein, putative	FALSE
PVP01_0010910	conserved Plasmodium protein, unknown function	NA	NA	NA	NA	NA	NA	NA	FALSE
PVP01_1446300	leucine-rich repeat protein	OG0000632	5	PBANKA_1442800	PF3D7_1228100	PcyM_1449500	PCYB_145380	leucine-rich repeat protein	FALSE
PVP01_0004590	PIR protein	NA	NA	NA	NA	NA	NA	NA	FALSE
PVP01_1253400	RAP protein, putative	OG0004346	5	PBANKA_1317300	PF3D7_1453600	PcyM_1261500	PCYB_126170	RAP protein, putative	FALSE
PVP01_0005280	PIR protein	NA	NA	NA	NA	NA	NA	NA	FALSE
PVP01_0106800	conserved Plasmodium protein, unknown function	OG0003636	5	PBANKA_0804200	PF3D7_0706600	PcyM_0107500	PCYB_011400	conserved Plasmodium protein, unknown function	TRUE
PVP01_1024900	structural maintenance of chromosomes protein 4, putative	OG0002050	5	PBANKA_1108700	PF3D7_0509100	PcyM_1024600	PCYB_103250	structural maintenance of chromosomes protein 4, putative	FALSE
PVP01_1411300	zinc finger protein, putative	OG0004546	5	PBANKA_1408800	PF3D7_1310300	PcyM_1411900	PCYB_141980	zinc finger protein, putative	FALSE
PVP01_0004250	hypothetical protein	NA	NA	NA	NA	NA	NA	NA	FALSE
PVP01_1310200	kinesin-X3, putative	OG0000289	5	PBANKA_0609500	PF3D7_1211000	PcyM_1311800	PCYB_131970	kinesin-X3, putative	FALSE
PVP01_0613400	rRNA-processing protein EBP2, putative	OG0001068	5	PBANKA_0512400	PF3D7_1028300	PcyM_0616700	PCYB_062240	rRNA-processing protein EBP2, putative	FALSE
PVP01_1462400	NEDD8-conjugating enzyme UBC12, putative	OG0003194	5	PBANKA_1458500	PF3D7_1245300	PcyM_1468700	PCYB_146980	NEDD8-conjugating enzyme UBC12, putative	FALSE
PVP01_0824000	ribosomal protein L27, mitochondrial, putative	OG0000984	5	PBANKA_0413900	PF3D7_0316100	PcyM_0825900	PCYB_083360	ribosomal protein L27, mitochondrial, putative	FALSE
PVP01_1250700	conserved Plasmodium protein, unknown function	OG0002619	5	PBANKA_1319900	PF3D7_1456200	PcyM_1257300	PCYB_125890	conserved Plasmodium protein, unknown function	FALSE
PVP01_0617800	conserved Plasmodium protein, unknown function	OG0001091	5	PBANKA_0516500	PF3D7_1032700	PcyM_0621900	PCYB_062700	conserved Plasmodium protein, unknown function	FALSE
PVP01_0927600	small nuclear ribonucleoprotein F, putative	OG0001663	5	PBANKA_0921500	PF3D7_1126900	PcyM_0931300	PCYB_093300	small nuclear ribonucleoprotein F, putative	FALSE
PVP01_1414200	peptidyl-prolyl cis-trans isomerase, putative	OG0002918	5	PBANKA_1411700	PF3D7_1313300	PcyM_1415000	PCYB_142270	peptidyl-prolyl cis-trans isomerase, putative	FALSE
PVP01_0008100	PIR protein	NA	NA	NA	NA	NA	NA	NA	FALSE
PVP01_1461900	translation machinery-associated protein 46, putative	OG0003191	5	PBANKA_1458000	PF3D7_1244800	PcyM_1468100	PCYB_146930	translation machinery-associated protein 46, putative	FALSE
PVP01_1443500	conserved protein, unknown function	OG0003094	5	PBANKA_1440200	PF3D7_1225300	PcyM_1446100	PCYB_145100	conserved protein, unknown function	FALSE
PVP01_1434800	serine--tRNA ligase, putative	OG0003047	5	PBANKA_1431700	PF3D7_1216000	PcyM_1436300	PCYB_144240	serine--tRNA ligase, putative	FALSE
PVP01_1036000	Plasmodium exported protein, unknown function	NA	NA	NA	NA	NA	NA	NA	FALSE
PVP01_1203600	conserved Plasmodium protein, unknown function	OG0004513	5	PBANKA_1364000	PF3D7_1351200	PcyM_1204900	PCYB_121250	conserved Plasmodium protein, unknown function	FALSE
PVP01_0523300	Plasmodium exported protein (PHIST), unknown function	OG0005513	3	NA	NA	PcyM_0524800	PCYB_052960	NA	FALSE
PVP01_0108600	EKC/KEOPS complex subunit BUD32, putative	OG0001405	5	PBANKA_0805600	PF3D7_0708300	PcyM_0109300	PCYB_011540	EKC/KEOPS complex subunit BUD32	TRUE
PVP01_0411700	conserved protein, unknown function	OG0000873	5	PBANKA_0310100	PF3D7_0213200	PcyM_0409700	PCYB_041690	conserved protein, unknown function	FALSE
PVP01_0944100	translation initiation factor eIF-1A, putative	OG0001587	5	PBANKA_0905600	PF3D7_1143400	PcyM_0948200	PCYB_094900	translation initiation factor eIF-1A, putative	TRUE
PVP01_0219100	Plasmodium exported protein, unknown function	NA	NA	NA	NA	NA	NA	NA	FALSE
PVP01_0939300	conserved protein, unknown function	OG0004788	5	PBANKA_0910400	PF3D7_1138300	PcyM_0943400	PCYB_094420	conserved protein, unknown function	FALSE
PVP01_0213700	eukaryotic translation initiation factor 2 subunit alpha, putative	OG0000808	5	PBANKA_0212100	PF3D7_0728000	PcyM_0217200	PCYB_022290	eukaryotic translation initiation factor 2 subunit alpha	FALSE
PVP01_1404000	methyltransferase, putative	OG0002864	5	PBANKA_1401600	PF3D7_1303100	PcyM_1404600	PCYB_141260	methyltransferase, putative	FALSE
PVP01_0503100	PIR protein	NA	NA	NA	NA	NA	NA	NA	FALSE
PVP01_0008790	Plasmodium exported protein, unknown function	NA	NA	NA	NA	NA	NA	NA	FALSE
PVP01_0607000	schizont egress antigen-1, putative	OG0003430	5	PBANKA_0506000	PF3D7_1021800	PcyM_0608900	PCYB_061610	schizont egress antigen-1	TRUE
PVP01_0922600	conserved protein, unknown function	OG0001699	5	PBANKA_0926300	PF3D7_1122000	PcyM_0925200	PCYB_092800	conserved protein, unknown function	FALSE
PVP01_0417600	serine-repeat antigen 5 (SERA)	NA	NA	NA	NA	NA	NA	NA	FALSE
PVP01_1264300	conserved Plasmodium protein, unknown function	OG0004994	4	NA	PF3D7_1442700	PcyM_1273200	PCYB_127240	conserved Plasmodium protein, unknown function	TRUE
PVP01_0011120	PIR protein	NA	NA	NA	NA	NA	NA	NA	FALSE
PVP01_0824500	zinc finger protein, putative	OG0000253	5	PBANKA_0413400	PF3D7_0315600	PcyM_0826500	PCYB_083410	zinc finger protein, putative	FALSE
PVP01_0004080	PIR protein	NA	NA	NA	NA	NA	NA	NA	FALSE
PVP01_1203300	60S ribosomal protein L17, putative	OG0002851	5	PBANKA_1364200	PF3D7_1351400	PcyM_1204700	PCYB_121230	60S ribosomal protein L17, putative	TRUE
PVP01_1321600	conserved Plasmodium protein, unknown function	OG0004796	4	PBANKA_1016900	PF3D7_1427700	PcyM_1325100	NA	conserved Plasmodium protein, unknown function	TRUE
PVP01_1206100	WD repeat-containing protein 16, putative	OG0000600	5	PBANKA_1361500	PF3D7_1348700	PcyM_1207600	PCYB_121500	WD repeat-containing protein 16, putative	FALSE
PVP01_0730300	conserved protein, unknown function	OG0001549	5	PBANKA_0832400	PF3D7_0931600	PcyM_0732800	PCYB_073910	conserved protein, unknown function	FALSE
PVP01_0000420	PIR protein	NA	NA	NA	NA	NA	NA	NA	FALSE
PVP01_0006490	Plasmodium exported protein (PHIST), unknown function	NA	NA	NA	NA	NA	NA	NA	FALSE
PVP01_0405100	Plasmodium exported protein, unknown function	OG0003364	5	PBANKA_0316100	PF3D7_0219900	PcyM_0402200	PCYB_041070	Plasmodium exported protein, unknown function	FALSE
PVP01_0004530	Plasmodium exported protein, unknown function, pseudogene	NA	NA	NA	NA	NA	NA	NA	FALSE
PVP01_1454300	conserved Plasmodium protein, unknown function	OG0003148	5	PBANKA_1450800	PF3D7_1236200	PcyM_1460100	PCYB_146190	conserved Plasmodium protein, unknown function	FALSE
PVP01_1228100	RNA-binding protein, putative	OG0000583	5	PBANKA_1341500	PF3D7_1326300	PcyM_1232400	PCYB_123630	RNA-binding protein, putative	FALSE
PVP01_1266800	porphobilinogen synthase, putative	OG0002534	5	PBANKA_1304100	PF3D7_1440300	PcyM_1275700	PCYB_127490	porphobilinogen synthase	FALSE
PVP01_0906200	40S ribosomal protein S4, putative	OG0001793	5	PBANKA_0941500	PF3D7_1105400	PcyM_0907200	PCYB_091240	40S ribosomal protein S4, putative	FALSE
PVP01_0604700	TMEM94 domain-containing protein, putative	OG0000390	5	PBANKA_0503700	PF3D7_1019500	PcyM_0605200	PCYB_061380	TMEM94 domain-containing protein, putative	FALSE
PVP01_1441700	conserved Plasmodium protein, unknown function	OG0004630	5	PBANKA_1438400	PF3D7_1223500	PcyM_1443900	PCYB_144920	conserved Plasmodium protein, unknown function	FALSE
PVP01_1011800	conserved Plasmodium protein, unknown function	OG0004260	5	PBANKA_1236800	PF3D7_0522100	PcyM_1009700	PCYB_101960	conserved Plasmodium protein, unknown function	TRUE
PVP01_0708300	small nuclear ribonucleoprotein Sm D3, putative	OG0001433	5	PBANKA_0811000	PF3D7_0909800	PcyM_0708100	PCYB_071760	small nuclear ribonucleoprotein Sm D3, putative	FALSE
PVP01_0804200	conserved Plasmodium protein, unknown function	OG0004163	5	PBANKA_1202800	PF3D7_1004500	PcyM_0803900	PCYB_081380	conserved Plasmodium protein, unknown function	TRUE
PVP01_0006970	PIR protein	NA	NA	NA	NA	NA	NA	NA	FALSE
PVP01_0007040	PIR protein	NA	NA	NA	NA	NA	NA	NA	FALSE
PVP01_1432900	GPI ethanolamine phosphate transferase 3, putative	OG0003035	5	PBANKA_1429900	PF3D7_1214100	PcyM_1434400	PCYB_144070	GPI ethanolamine phosphate transferase 3, putative	FALSE
PVP01_0934600	RNA (uracil-5-)methyltransferase, putative	OG0001628	5	PBANKA_0914600	PF3D7_1133800	PcyM_0938600	PCYB_093970	RNA (uracil-5-)methyltransferase, putative	FALSE
PVP01_0701400	conserved protein, unknown function	OG0001010	5	PBANKA_0418400	PF3D7_0903000	PcyM_0700700	PCYB_071080	conserved protein, unknown function	TRUE
PVP01_1019000	conserved Plasmodium protein, unknown function	OG0004058	5	PBANKA_1114500	PF3D7_0514900	PcyM_1017900	PCYB_102680	conserved Plasmodium protein, unknown function	FALSE
PVP01_0318100	Obg-like ATPase 1, putative	OG0000412	5	PBANKA_0619900	PF3D7_0722400	PcyM_0322700	PCYB_032620	Obg-like ATPase 1, putative	FALSE
PVP01_0606200	conserved protein, unknown function	OG0001032	5	PBANKA_0505200	PF3D7_1021000	PcyM_0607400	PCYB_061530	conserved protein, unknown function	FALSE
PVP01_0008020	PIR protein	NA	NA	NA	NA	NA	NA	NA	FALSE
PVP01_1449700	mitosis protein dim1, putative	OG0003126	5	PBANKA_1446200	PF3D7_1231500	PcyM_1454100	PCYB_145710	mitosis protein dim1, putative	FALSE
PVP01_0918600	conserved Plasmodium protein, unknown function	OG0004973	4	NA	PF3D7_1118000	PcyM_0920500	PCYB_092410	conserved Plasmodium protein, unknown function	FALSE
PVP01_1321400	leucine-rich repeat protein	OG0001889	5	PBANKA_1016700	PF3D7_1427900	PcyM_1324900	PCYB_133080	leucine-rich repeat protein	FALSE
PVP01_0726200	serine/threonine protein phosphatase 4, putative	OG0001533	5	PBANKA_0828500	PF3D7_0927700	PcyM_0727700	PCYB_073530	serine/threonine protein phosphatase 4, putative	FALSE
PVP01_1337400	conserved Plasmodium protein, unknown function	OG0003986	5	PBANKA_1031000	PF3D7_1411500	PcyM_1343900	PCYB_134520	conserved Plasmodium protein, unknown function	FALSE
PVP01_1457700	hydroxyethylthiazole kinase, putative	OG0005013	4	NA	PF3D7_1239600	PcyM_1463800	PCYB_146530	hydroxyethylthiazole kinase	FALSE
PVP01_1007900	NIMA related kinase 2, putative	OG0004275	5	PBANKA_1240700	PF3D7_0525900	PcyM_1005700	PCYB_101570	NIMA related kinase 2	FALSE
PVP01_0919400	actin-related protein 2/3 complex subunit 1, putative	OG0003837	5	PBANKA_0929300	PF3D7_1118800	PcyM_0921400	PCYB_092490	actin-related protein 2/3 complex subunit 1, putative	FALSE
PVP01_1408900	tripartite motif protein, putative	OG0004534	5	PBANKA_1406400	PF3D7_1307900	PcyM_1409500	PCYB_141740	tripartite motif protein, putative	TRUE
PVP01_1105700	conserved Plasmodium protein, unknown function	NA	NA	NA	NA	NA	NA	NA	TRUE
PVP01_0528900	conserved Plasmodium protein, unknown function	OG0003614	5	PBANKA_0721600	PF3D7_0419500	PcyM_0529600	PCYB_053380	conserved Plasmodium membrane protein, unknown function	FALSE
PVP01_0732500	tubulin delta chain, putative	OG0000451	5	PBANKA_0834600	PF3D7_0933800	PcyM_0735700	PCYB_074120	tubulin delta chain, putative	FALSE
PVP01_0001510	Plasmodium exported protein, unknown function, pseudogene	NA	NA	NA	NA	NA	NA	NA	FALSE
PVP01_1431900	U1 spliceosomal RNA	NA	NA	NA	NA	NA	NA	NA	TRUE
PVP01_1217000	phosphoinositide-binding protein PH2, putative	OG0002783	5	PBANKA_1351400	PF3D7_1337700	PcyM_1219700	PCYB_122520	phosphoinositide-binding protein PH2	FALSE
PVP01_0924400	structural maintenance of chromosomes protein 5, putative	OG0001685	5	PBANKA_0924500	PF3D7_1123800	PcyM_0927600	PCYB_092980	structural maintenance of chromosomes protein 5, putative	FALSE
PVP01_0801800	tryptophan-rich protein	OG0005215	2	NA	NA	NA	PCYB_081160	NA	FALSE
PVP01_0006780	Plasmodium exported protein, unknown function	NA	NA	NA	NA	NA	NA	NA	FALSE
PVP01_0006660	PIR protein	NA	NA	NA	NA	NA	NA	NA	FALSE
PVP01_1234900	conserved Plasmodium protein, unknown function	NA	NA	NA	NA	NA	NA	NA	TRUE
PVP01_0825000	eukaryotic translation initiation factor 4E, putative	OG0000385	5	PBANKA_0412800	PF3D7_0315100	PcyM_0827000	PCYB_083470	eukaryotic translation initiation factor 4E	FALSE
PVP01_0007330	PIR protein	NA	NA	NA	NA	NA	NA	NA	FALSE
PVP01_0303900	6-cysteine protein, putative, pseudogene	NA	NA	NA	NA	NA	NA	NA	TRUE
PVP01_0010580	PIR protein	NA	NA	NA	NA	NA	NA	NA	FALSE
PVP01_1254800	aminomethyltransferase, putative	OG0004340	5	PBANKA_1315900	PF3D7_1452200	PcyM_1263000	PCYB_126290	aminomethyltransferase, putative	FALSE
PVP01_0111600	conserved Plasmodium protein, unknown function	OG0004226	5	PBANKA_1221800	PF3D7_0711200	PcyM_0112700	PCYB_011840	conserved Plasmodium protein, unknown function	FALSE
PVP01_0002580	Plasmodium exported protein, unknown function	NA	NA	NA	NA	NA	NA	NA	FALSE
PVP01_0005450	Plasmodium exported protein, unknown function	NA	NA	NA	NA	NA	NA	NA	FALSE
PVP01_1418900	conserved protein, unknown function	OG0000615	5	PBANKA_1416500	PF3D7_1318000	PcyM_1419700	PCYB_142730	conserved protein, unknown function	FALSE
PVP01_0929900	26S proteasome regulatory subunit RPN7, putative	OG0001651	5	PBANKA_0919000	PF3D7_1129200	PcyM_0933700	PCYB_093540	26S proteasome regulatory subunit RPN7, putative	FALSE
PVP01_1007250	conserved Plasmodium protein, unknown function	OG0004818	4	PBANKA_1241400	NA	PcyM_1005090	PCYB_101500	NA	FALSE
PVP01_0009190	PIR protein	NA	NA	NA	NA	NA	NA	NA	FALSE
PVP01_1207100	ethanolamine-phosphate cytidylyltransferase, putative	OG0002832	5	PBANKA_1360500	PF3D7_1347700	PcyM_1208700	PCYB_121600	ethanolamine-phosphate cytidylyltransferase	FALSE
PVP01_1328800	conserved Plasmodium protein, unknown function	OG0000494	5	PBANKA_1023100	PF3D7_1420100	PcyM_1334100	PCYB_133710	conserved Plasmodium protein, unknown function	FALSE
PVP01_1315800	conserved Plasmodium protein, unknown function	OG0003921	5	PBANKA_1011200	PF3D7_1433700	PcyM_1317900	PCYB_132520	conserved Plasmodium protein, unknown function	FALSE
PVP01_0738800	Plasmodium exported protein, unknown function	NA	NA	NA	NA	NA	NA	NA	FALSE
PVP01_1253600	gamma-tubulin complex component, putative	OG0004345	5	PBANKA_1317100	PF3D7_1453400	PcyM_1261700	PCYB_126190	gamma-tubulin complex component, putative	FALSE
PVP01_0309300	erythrocyte vesicle protein 1, putative	OG0004795	5	PBANKA_1007600	PF3D7_0410000	PcyM_0312600	PCYB_031770	erythrocyte vesicle protein 1	FALSE
PVP01_0001790	PIR protein	NA	NA	NA	NA	NA	NA	NA	FALSE
PVP01_1251300	ferlin, putative	OG0002616	5	PBANKA_1319300	PF3D7_1455600	PcyM_1257900	PCYB_125950	ferlin, putative	FALSE
PVP01_MIT03100	ribosomal RNA fragment	NA	NA	NA	NA	NA	NA	NA	FALSE
PVP01_1341700	LCCL domain-containing protein, putative	OG0000501	5	PBANKA_1035200	PF3D7_1407000	PcyM_1349000	PCYB_134940	LCCL domain-containing protein	FALSE
PVP01_1214900	ABC transporter B family member 5, putative	OG0004472	5	PBANKA_1353300	PF3D7_1339900	PcyM_1217000	PCYB_122330	ABC transporter B family member 5, putative	FALSE
PVP01_1330100	signal recognition particle RNA	NA	NA	NA	NA	NA	NA	NA	TRUE
PVP01_1108300	protein AMR1, putative	OG0002216	5	PBANKA_1139700	PF3D7_1363700	PcyM_1107700	PCYB_111690	protein AMR1	FALSE
PVP01_0213600	conserved Plasmodium protein, unknown function	OG0003304	5	PBANKA_0212000	PF3D7_0727900	PcyM_0217100	PCYB_022280	conserved Plasmodium protein, unknown function	FALSE
PVP01_1330600	calmodulin, putative	OG0003966	5	PBANKA_1024400	PF3D7_1418300	PcyM_1336000	PCYB_133840	calmodulin, putative	FALSE
PVP01_0103300	cytosolic iron-sulfur assembly component 2, putative	OG0001385	5	PBANKA_0800800	PF3D7_0703100	PcyM_0103400	PCYB_011050	cytosolic iron-sulfur assembly component 2, putative	TRUE
PVP01_1466700	leucine-rich repeat protein	OG0004835	5	PBANKA_1462500	PF3D7_1249600	PcyM_1473600	PCYB_147400	leucine-rich repeat protein	TRUE
PVP01_0304700	liver specific protein 2	OG0004794	5	PBANKA_1003000	PF3D7_0405300	PcyM_0307500	PCYB_031310	liver specific protein 2, putative	TRUE
PVP01_1112100	ADP-ribosylation factor, putative	OG0002196	5	PBANKA_1136000	PF3D7_1359800	PcyM_1111800	PCYB_112080	ADP-ribosylation factor, putative	FALSE
PVP01_1258700	conserved protein, unknown function	OG0004333	5	PBANKA_1312100	PF3D7_1448300	PcyM_1267100	PCYB_126670	conserved protein, unknown function	TRUE
PVP01_0206200	mitochondrial carrier protein, putative	OG0000768	5	PBANKA_0204700	PF3D7_0108800	PcyM_0208400	PCYB_021540	mitochondrial carrier protein, putative	TRUE
PVP01_0003510	PIR protein	NA	NA	NA	NA	NA	NA	NA	FALSE
PVP01_0001620	Plasmodium exported protein, unknown function	NA	NA	NA	NA	NA	NA	NA	FALSE
PVP01_0837000	HAD superfamily protein, putative	OG0000914	5	PBANKA_0401800	PF3D7_0303200	PcyM_0841100	PCYB_084600	HAD superfamily protein, putative	FALSE
PVP01_0000040	STP1 protein	NA	NA	NA	NA	NA	NA	NA	FALSE
PVP01_1414000	conserved Plasmodium protein, unknown function	OG0004552	5	PBANKA_1411500	PF3D7_1313100	PcyM_1414800	PCYB_142250	conserved Plasmodium protein, unknown function	FALSE
PVP01_0207400	Niemann-Pick type C1-related protein, putative	OG0000226	5	PBANKA_0205900	PF3D7_0107500	PcyM_0209600	PCYB_021660	Niemann-Pick type C1-related protein	TRUE
PVP01_0008470	PIR protein	NA	NA	NA	NA	NA	NA	NA	FALSE
PVP01_0931100	small nucleolar RNA snoR13	NA	NA	NA	NA	NA	NA	NA	FALSE
PVP01_1104200	secreted ookinete protein, putative	OG0004147	5	PBANKA_1143700	PF3D7_1367800	PcyM_1103400	PCYB_111270	secreted ookinete protein, putative	FALSE
PVP01_0622100	enhancer of rudimentary homolog, putative	OG0001115	5	PBANKA_0520600	PF3D7_1037700	PcyM_0627100	PCYB_063140	enhancer of rudimentary homolog, putative	TRUE
PVP01_1421600	dihydrolipoyllysine-residue succinyltransferase component of 2-oxoglutarate dehydrogenase complex, putative	OG0002970	5	PBANKA_1419100	PF3D7_1320800	PcyM_1422600	PCYB_142990	dihydrolipoyllysine-residue succinyltransferase component of 2-oxoglutarate dehydrogenase complex	FALSE
PVP01_1263400	gamma-tubulin complex component, putative	OG0002550	5	PBANKA_1307500	PF3D7_1443600	PcyM_1272200	PCYB_127150	gamma-tubulin complex component, putative	FALSE
PVP01_0940300	conserved Plasmodium protein, unknown function	OG0005098	3	NA	NA	PcyM_0944400	PCYB_094520	NA	TRUE
PVP01_1309700	general transcription factor 3C polypeptide 5, putative	OG0001177	5	PBANKA_0608900	PF3D7_1210400	PcyM_1311300	PCYB_131920	general transcription factor 3C polypeptide 5, putative	FALSE
PVP01_1448300	thioredoxin-like associated protein 1, putative	OG0003119	5	PBANKA_1444800	PF3D7_1230100	PcyM_1452500	PCYB_145570	thioredoxin-like associated protein 1, putative	FALSE
PVP01_1257600	crossover junction endonuclease MUS81, putative	OG0002581	5	PBANKA_1313100	PF3D7_1449400	PcyM_1265900	PCYB_126570	crossover junction endonuclease MUS81, putative	FALSE
PVP01_1331200	conserved protein, unknown function	OG0001925	5	PBANKA_1025000	PF3D7_1417700	PcyM_1336600	PCYB_133900	conserved protein, unknown function	TRUE
PVP01_0000510	PIR protein	NA	NA	NA	NA	NA	NA	NA	FALSE
PVP01_0002680	Plasmodium exported protein, unknown function	NA	NA	NA	NA	NA	NA	NA	FALSE
PVP01_0005830	PIR protein	NA	NA	NA	NA	NA	NA	NA	FALSE
PVP01_1307500	amino acid transporter, putative	OG0000408	5	PBANKA_0606900	PF3D7_1208400	PcyM_1309000	PCYB_131700	amino acid transporter, putative	TRUE
PVP01_1446900	conserved Plasmodium protein, unknown function	OG0003112	5	PBANKA_1443400	PF3D7_1228700	PcyM_1450300	PCYB_145440	conserved Plasmodium protein, unknown function	FALSE
PVP01_1244500	GTP-binding protein, putative	OG0000574	5	PBANKA_1326000	PF3D7_1462300	PcyM_1250500	PCYB_125280	GTP-binding protein, putative	TRUE
PVP01_0417200	serine-repeat antigen 5 (SERA)	NA	NA	NA	NA	NA	NA	NA	FALSE
PVP01_0712400	pseudouridylate synthase, putative	OG0001459	5	PBANKA_0815000	PF3D7_0914000	PcyM_0712200	PCYB_072160	pseudouridylate synthase, putative	FALSE
PVP01_0936000	regulator of chromosome condensation, putative	OG0001620	4	PBANKA_0913300	NA	PcyM_0940000	PCYB_094100	NA	FALSE
PVP01_0817500	conserved Plasmodium protein, unknown function	OG0004203	5	PBANKA_1215800	PF3D7_0322700	PcyM_0818500	PCYB_082710	conserved Plasmodium protein, unknown function	TRUE
PVP01_1338300	eukaryotic translation initiation factor 2 subunit gamma, putative	OG0001962	5	PBANKA_1031900	PF3D7_1410600	PcyM_1344900	PCYB_134610	eukaryotic translation initiation factor 2 subunit gamma, putative	TRUE
PVP01_0727100	conserved Plasmodium protein, unknown function	OG0004942	3	PBANKA_0829400	PF3D7_0928600	NA	NA	conserved Plasmodium protein, unknown function	FALSE
PVP01_0922900	conserved Plasmodium protein, unknown function	OG0003831	5	PBANKA_0926000	PF3D7_1122300	PcyM_0925500	PCYB_092830	conserved Plasmodium protein, unknown function	FALSE
PVP01_0309000	peptide chain release factor 2, putative	OG0001833	5	PBANKA_1007300	PF3D7_0409700	PcyM_0312300	PCYB_031740	peptide chain release factor 2	FALSE
PVP01_1406400	mitogen-activated protein kinase phosphatase 1, putative	OG0004827	4	PBANKA_1404000	PF3D7_1305500	NA	PCYB_141500	mitogen-activated protein kinase phosphatase 1, putative	FALSE
PVP01_0404200	tryptophan-rich protein	NA	NA	NA	NA	NA	NA	NA	FALSE
PVP01_1405200	conserved Plasmodium protein, unknown function	OG0004523	5	PBANKA_1402800	PF3D7_1304300	PcyM_1405800	PCYB_141380	conserved Plasmodium protein, unknown function	TRUE
PVP01_0527100	conserved Plasmodium protein, unknown function	OG0001370	5	PBANKA_0719800	PF3D7_0417700	PcyM_0527400	PCYB_053200	conserved Plasmodium protein, unknown function	FALSE
PVP01_0620300	conserved Plasmodium protein, unknown function	OG0005319	3	NA	NA	PcyM_0625200	PCYB_062950	NA	FALSE
PVP01_1342200	WD repeat-containing protein 65, putative	OG0001982	5	PBANKA_1035700	PF3D7_1406500	PcyM_1349500	PCYB_134990	WD repeat-containing protein 65, putative	FALSE
PVP01_0010650	PIR protein	NA	NA	NA	NA	NA	NA	NA	FALSE
PVP01_1468100	HSP20-like chaperone, putative	OG0003224	5	PBANKA_1463900	PF3D7_1251000	PcyM_1475100	PCYB_147540	HSP20-like chaperone, putative	TRUE
PVP01_1462700	kinesin-15, putative	OG0003196	5	PBANKA_1458800	PF3D7_1245600	PcyM_1469000	PCYB_147010	kinesin-15, putative	FALSE
PVP01_0516000	Plasmodium exported protein (PHIST), unknown function	OG0005510	3	NA	NA	PcyM_0516000	PCYB_052280	NA	FALSE
PVP01_0912600	peptidyl-prolyl cis-trans isomerase, putative	OG0001756	5	PBANKA_0935800	PF3D7_1111800	PcyM_0913900	PCYB_091810	peptidyl-prolyl cis-trans isomerase, putative	TRUE
PVP01_0009970	PIR protein	NA	NA	NA	NA	NA	NA	NA	FALSE
PVP01_0010460	PIR protein	NA	NA	NA	NA	NA	NA	NA	FALSE
PVP01_1033900	tryptophan-rich protein	OG0005337	3	NA	NA	PcyM_1034600	PCYB_104180	NA	FALSE
PVP01_0117600	adenylyl cyclase beta, putative	OG0002401	5	PBANKA_1227600	PF3D7_0802600	PcyM_0119900	PCYB_012440	adenylyl cyclase beta	FALSE
PVP01_0300100	Plasmodium exported protein, unknown function	NA	NA	NA	NA	NA	NA	NA	FALSE
PVP01_0312200	transcription initiation factor IIA subunit 1, putative	OG0003532	4	PBANKA_0614100	PF3D7_0716400	PcyM_0315700	NA	transcription initiation factor IIA subunit 1, putative	FALSE
PVP01_0908600	AP2 domain transcription factor, putative	OG0001778	5	PBANKA_0939100	PF3D7_1107800	PcyM_0909700	PCYB_091480	AP2 domain transcription factor, putative	TRUE
PVP01_0220700	PIR protein	NA	NA	NA	NA	NA	NA	NA	FALSE
PVP01_0007920	PIR protein	NA	NA	NA	NA	NA	NA	NA	FALSE
PVP01_1137300	conserved Plasmodium protein, unknown function	OG0005568	2	NA	NA	PcyM_1139400	NA	NA	FALSE
PVP01_0942600	inner membrane complex protein 1b, putative	OG0003770	5	PBANKA_0907100	PF3D7_1141900	PcyM_0946600	PCYB_094740	inner membrane complex protein 1b, putative	FALSE
PVP01_1237000	conserved Plasmodium protein, unknown function	OG0002692	5	PBANKA_1333000	PF3D7_1469800	PcyM_1242200	PCYB_124520	conserved Plasmodium protein, unknown function	TRUE
PVP01_1033700	Plasmodium exported protein, unknown function	OG0005336	3	NA	NA	PcyM_1034400	PCYB_104160	NA	FALSE
PVP01_0732100	conserved Plasmodium protein, unknown function	OG0003742	5	PBANKA_0834200	PF3D7_0933400	PcyM_0735200	PCYB_074085	conserved Plasmodium protein, unknown function	FALSE
PVP01_0000060	Plasmodium exported protein, unknown function	NA	NA	NA	NA	NA	NA	NA	FALSE
PVP01_0109200	protein SCO1, putative	OG0002359	5	PBANKA_1219400	PF3D7_0708900	PcyM_0110000	PCYB_011600	protein SCO1, putative	FALSE
PVP01_0008360	PIR protein	NA	NA	NA	NA	NA	NA	NA	FALSE
PVP01_0302900	conserved Plasmodium protein, unknown function	OG0003882	5	PBANKA_1001300	PF3D7_0403600	PcyM_0305400	PCYB_031130	conserved Plasmodium protein, unknown function	TRUE
PVP01_1331000	ATP synthase-associated protein, putative	OG0001923	5	PBANKA_1024800	PF3D7_1417900	PcyM_1336400	PCYB_133880	ATP synthase-associated protein, putative	FALSE
PVP01_0724400	parasitophorous vacuolar protein 5, putative	OG0003715	5	PBANKA_0826700	PF3D7_0925900	PcyM_0725200	PCYB_073350	lipocalin	TRUE
PVP01_0736700	Plasmodium exported protein, unknown function, pseudogene	NA	NA	NA	NA	NA	NA	NA	FALSE
PVP01_0002460	Plasmodium exported protein, unknown function	NA	NA	NA	NA	NA	NA	NA	FALSE
PVP01_0919100	nucleolar protein 56, putative	OG0001722	5	PBANKA_0929600	PF3D7_1118500	PcyM_0921100	PCYB_092460	nucleolar protein 56, putative	TRUE
PVP01_0616400	SAE2 domain-containing protein, putative	OG0003461	5	PBANKA_0515300	PF3D7_1031300	PcyM_0620200	PCYB_062560	SAE2 domain-containing protein, putative	FALSE
PVP01_1143300	nucleoside diphosphate kinase, putative	OG0003255	5	PBANKA_0104400	PF3D7_0605600	PcyM_1146500	PCYB_115080	nucleoside diphosphate kinase, putative	FALSE
PVP01_0303400	AP2 domain transcription factor AP2-SP2, putative	OG0005303	3	NA	NA	PcyM_0305900	PCYB_031180	NA	FALSE
PVP01_1453500	tetQ family GTPase, putative	OG0004670	5	PBANKA_1450000	PF3D7_1235400	PcyM_1458700	PCYB_146110	tetQ family GTPase, putative	TRUE
PVP01_1004300	tRNA Arginine	NA	NA	NA	NA	NA	NA	NA	FALSE
PVP01_1273400	Plasmodium exported protein, unknown function	NA	NA	NA	NA	NA	NA	NA	FALSE
PVP01_0610700	conserved Plasmodium protein, unknown function	OG0003445	5	PBANKA_0509700	PF3D7_1025500	PcyM_0613600	PCYB_061980	conserved Plasmodium protein, unknown function	FALSE
PVP01_1008500	conserved protein, unknown function	OG0002481	5	PBANKA_1240100	PF3D7_0525300	PcyM_1006300	PCYB_101630	conserved protein, unknown function	FALSE
PVP01_0308000	perforin-like protein 1	OG0000483	5	PBANKA_1006300	PF3D7_0408700	PcyM_0311200	PCYB_031640	perforin-like protein 1	TRUE
PVP01_0534400	reticulocyte binding protein 2-P1	OG0005516	3	NA	NA	PcyM_0535200	PCYB_053850	NA	FALSE
PVP01_0005010	PIR protein	NA	NA	NA	NA	NA	NA	NA	FALSE
PVP01_1200700	PIR protein	NA	NA	NA	NA	NA	NA	NA	FALSE
PVP01_1266500	allantoicase, putative	OG0004305	5	PBANKA_1304400	PF3D7_1440500	PcyM_1275400	PCYB_127460	allantoicase, putative	FALSE
PVP01_0001880	Plasmodium exported protein, unknown function	NA	NA	NA	NA	NA	NA	NA	FALSE
PVP01_MIT01200	ribosomal RNA fragment	NA	NA	NA	NA	NA	NA	NA	FALSE
PVP01_0200100	PIR protein	NA	NA	NA	NA	NA	NA	NA	FALSE
PVP01_1255700	E3 SUMO-protein ligase NSE2, putative	OG0002594	5	PBANKA_1315000	PF3D7_1451300	PcyM_1264000	PCYB_126380	E3 SUMO-protein ligase NSE2, putative	TRUE
PVP01_1433000	histone-lysine N-methyltransferase, putative	OG0004602	5	PBANKA_1430000	PF3D7_1214200	PcyM_1434500	PCYB_144080	histone-lysine N-methyltransferase, putative	FALSE
PVP01_1025400	conserved protein, unknown function	OG0000508	5	PBANKA_1108200	PF3D7_0508600	PcyM_1025100	PCYB_103300	conserved protein, unknown function	FALSE
PVP01_1101800	tRNA Glycine	NA	NA	NA	NA	NA	NA	NA	FALSE
PVP01_0006520	Plasmodium exported protein, unknown function	NA	NA	NA	NA	NA	NA	NA	FALSE
PVP01_1274600	Plasmodium exported protein, unknown function	NA	NA	NA	NA	NA	NA	NA	FALSE
PVP01_0519700	eukaryotic translation initiation factor 3 subunit G, putative	OG0001344	5	PBANKA_0715200	PF3D7_0815600	PcyM_0520800	PCYB_052630	eukaryotic translation initiation factor 3 subunit G, putative	FALSE
PVP01_0001660	PIR protein	NA	NA	NA	NA	NA	NA	NA	FALSE
PVP01_0318300	U3 small nucleolar RNA-associated protein 7, putative	OG0001240	5	PBANKA_0620100	PF3D7_0722600	PcyM_0322900	PCYB_032640	U3 small nucleolar RNA-associated protein 7, putative	FALSE
PVP01_0309500	tRNA Isoleucine	NA	NA	NA	NA	NA	NA	NA	FALSE
PVP01_0809900	kinesin-4, putative	OG0004811	4	PBANKA_1208200	NA	PcyM_0810000	PCYB_081950	NA	TRUE
PVP01_0501200	PIR protein	NA	NA	NA	NA	NA	NA	NA	FALSE
PVP01_1016300	eukaryotic translation initiation factor 3 subunit B, putative	OG0002438	5	PBANKA_1232500	PF3D7_0517700	PcyM_1014600	PCYB_102410	eukaryotic translation initiation factor 3 subunit B, putative	FALSE
PVP01_0006820	PIR protein	NA	NA	NA	NA	NA	NA	NA	FALSE
PVP01_1426750	conserved Plasmodium protein, unknown function	OG0005534	2	NA	NA	NA	PCYB_143470	NA	FALSE
PVP01_1333900	uracil-DNA glycosylase, putative	OG0001939	5	PBANKA_1027700	PF3D7_1415000	PcyM_1339800	PCYB_134170	uracil-DNA glycosylase	TRUE
PVP01_0917400	heat shock protein 101, putative	OG0003844	5	PBANKA_0931200	PF3D7_1116800	PcyM_0919300	PCYB_092290	heat shock protein 101	TRUE
PVP01_0724600	protein kinase, putative	OG0001522	5	PBANKA_0826900	PF3D7_0926100	PcyM_0725500	PCYB_073370	protein kinase, putative	FALSE
PVP01_1412500	26S protease regulatory subunit 7, putative	OG0002907	5	PBANKA_1410000	PF3D7_1311500	PcyM_1413200	PCYB_142100	26S protease regulatory subunit 7, putative	TRUE
PVP01_1136000	conserved Plasmodium protein, unknown function	OG0003276	5	PBANKA_0111400	PF3D7_0613100	PcyM_1138100	PCYB_114390	conserved Plasmodium protein, unknown function	TRUE
PVP01_1433900	SUN domain-containing protein, putative	OG0003040	5	PBANKA_1430900	PF3D7_1215100	PcyM_1435400	PCYB_144160	SUN domain-containing protein, putative	FALSE
PVP01_0002280	Plasmodium exported protein, unknown function	NA	NA	NA	NA	NA	NA	NA	FALSE
PVP01_1011200	iron-sulfur cluster assembly protein SufA	OG0000550	5	PBANKA_1237400	PF3D7_0522700	PcyM_1009100	PCYB_101900	iron-sulfur cluster assembly protein SufA	FALSE
PVP01_1436600	diphthamide biosynthesis protein 3, putative	OG0003053	5	PBANKA_1433400	PF3D7_1217800	PcyM_1438100	PCYB_144410	diphthamide biosynthesis protein 3, putative	FALSE
PVP01_0313800	dynein heavy chain, putative	OG0003539	5	PBANKA_0615700	PF3D7_0718000	PcyM_0317300	PCYB_032170	dynein heavy chain, putative	FALSE
PVP01_0622500	GDP dissociation inhibitor, putative	OG0003472	5	PBANKA_0521000	PF3D7_1038100	PcyM_0627500	PCYB_063180	GDP dissociation inhibitor, putative	FALSE
PVP01_0305100	lysine decarboxylase, putative	OG0001812	5	PBANKA_1003400	PF3D7_0405700	PcyM_0308000	PCYB_031350	lysine decarboxylase, putative	TRUE
PVP01_0115700	peptidyl-prolyl cis-trans isomerase precursor, putative	OG0002391	5	PBANKA_1225800	PF3D7_0804800	PcyM_0117800	PCYB_012240	peptidyl-prolyl cis-trans isomerase	FALSE
PVP01_1403900	ATP synthase-associated protein, putative	OG0002863	5	PBANKA_1401500	PF3D7_1303000	PcyM_1404500	PCYB_141250	ATP synthase-associated protein, putative	FALSE
PVP01_0214800	conserved Plasmodium protein, unknown function	OG0003308	5	PBANKA_0213200	PF3D7_0729100	PcyM_0218300	PCYB_022400	conserved Plasmodium protein, unknown function	TRUE
PVP01_1017800	40S ribosomal protein S11, putative	OG0002426	5	PBANKA_1231000	PF3D7_0516200	PcyM_1016500	PCYB_102560	40S ribosomal protein S11	FALSE
PVP01_1010700	heptatricopeptide repeat-containing protein, putative	OG0004263	5	PBANKA_1238000	PF3D7_0523200	PcyM_1008600	PCYB_101850	heptatricopeptide repeat-containing protein, putative	FALSE
PVP01_0007030	Plasmodium exported protein, unknown function	NA	NA	NA	NA	NA	NA	NA	FALSE
PVP01_1337700	rhomboid protease ROM8, putative	OG0003987	5	PBANKA_1031300	PF3D7_1411200	PcyM_1344200	PCYB_134550	rhomboid protease ROM8	FALSE
PVP01_0114000	DnaJ protein, putative	OG0000541	5	PBANKA_1224200	PF3D7_0806500	PcyM_0115500	PCYB_012080	DnaJ protein, putative	FALSE
PVP01_0410800	protein transport protein SEC31, putative	OG0000877	5	PBANKA_0311000	PF3D7_0214100	PcyM_0408500	PCYB_041610	protein transport protein SEC31	FALSE
PVP01_1140200	T-complex protein 1 subunit zeta, putative	OG0000716	5	PBANKA_0107300	PF3D7_0608700	PcyM_1143200	PCYB_114780	T-complex protein 1 subunit zeta	FALSE
PVP01_0916450	conserved Plasmodium protein, unknown function	OG0005378	2	NA	NA	PcyM_0918200	NA	NA	TRUE
PVP01_0620100	U2 snRNA/tRNA pseudouridine synthase, putative	OG0001107	5	PBANKA_0518800	PF3D7_1035000	PcyM_0625000	PCYB_062930	U2 snRNA/tRNA pseudouridine synthase, putative	FALSE
PVP01_1148500	PIR protein	NA	NA	NA	NA	NA	NA	NA	FALSE
PVP01_1024800	leucine-rich repeat protein	OG0002051	5	PBANKA_1108800	PF3D7_0509200	PcyM_1024500	PCYB_103240	leucine-rich repeat protein	FALSE
PVP01_0109000	cloroquine resistance associated protein Cg8, putative	OG0002357	5	PBANKA_1219200	PF3D7_0708700	PcyM_0109800	PCYB_011580	Cg8 protein	TRUE
PVP01_0005520	PIR protein	NA	NA	NA	NA	NA	NA	NA	FALSE
PVP01_1320200	AP2 domain transcription factor AP2-O3, putative	OG0003932	5	PBANKA_1015500	PF3D7_1429200	PcyM_1323300	PCYB_132950	AP2 domain transcription factor AP2-O3, putative	FALSE
PVP01_0533500	PIR protein	NA	NA	NA	NA	NA	NA	NA	FALSE
PVP01_1435000	glycerol-3-phosphate dehydrogenase [NAD( )], putative	OG0004609	5	PBANKA_1431900	PF3D7_1216200	PcyM_1436500	PCYB_144260	glycerol-3-phosphate dehydrogenase [NAD( )], putative	TRUE
PVP01_1270600	tubulin epsilon chain, putative	OG0002514	5	PBANKA_1300500	PF3D7_1475700	PcyM_1280100	PCYB_127850	tubulin epsilon chain, putative	FALSE
PVP01_1102800	conserved Plasmodium protein, unknown function	OG0004153	5	PBANKA_1145100	PF3D7_1369200	PcyM_1101900	PCYB_111130	conserved Plasmodium protein, unknown function	FALSE
PVP01_0827900	26S proteasome regulatory subunit RPN12, putative	OG0000971	5	PBANKA_0410300	PF3D7_0312300	PcyM_0830500	PCYB_083720	26S proteasome regulatory subunit RPN12, putative	FALSE
PVP01_0730800	protein MAM3, putative	OG0000448	5	PBANKA_0832900	PF3D7_0932100	PcyM_0733300	PCYB_073960	protein MAM3, putative	TRUE
PVP01_1329200	eukaryotic translation initiation factor 3 subunit H, putative	OG0001920	5	PBANKA_1023500	PF3D7_1419700	PcyM_1334500	PCYB_133750	eukaryotic translation initiation factor 3 subunit H, putative	FALSE
PVP01_0412100	multidrug efflux pump, putative	OG0004884	5	PBANKA_0309700	PF3D7_0212800	PcyM_0410200	PCYB_041730	multidrug efflux pump, putative	FALSE
PVP01_0527700	conserved Plasmodium protein, unknown function	OG0003609	5	PBANKA_0720400	PF3D7_0418300	PcyM_0528300	PCYB_053260	conserved Plasmodium protein, unknown function	TRUE
PVP01_1117300	adenylosuccinate synthetase, putative	OG0002171	5	PBANKA_1131100	PF3D7_1354500	PcyM_1117400	PCYB_112580	adenylosuccinate synthetase	TRUE
PVP01_1457100	HD superfamily phosphohydrolase protein, putative	OG0003164	5	PBANKA_1453500	PF3D7_1239000	PcyM_1463200	PCYB_146470	HD superfamily phosphohydrolase protein, putative	TRUE
PVP01_1341800	radical SAM protein, putative	OG0001979	5	PBANKA_1035300	PF3D7_1406900	PcyM_1349100	PCYB_134950	radical SAM protein, putative	FALSE
PVP01_1313800	ataxin-2 like protein, putative	OG0000486	5	PBANKA_1009100	PF3D7_1435700	PcyM_1315800	PCYB_132320	ataxin-2 like protein, putative	FALSE
PVP01_0739250	Plasmodium exported protein, unknown function, pseudogene	NA	NA	NA	NA	NA	NA	NA	FALSE
PVP01_0103200	conserved Plasmodium protein, unknown function	OG0003617	5	PBANKA_0800700	PF3D7_0703000	PcyM_0103300	PCYB_011040	conserved Plasmodium protein, unknown function	FALSE
PVP01_0726300	cytochrome c oxidase subunit 5B, putative	OG0001534	5	PBANKA_0828600	PF3D7_0927800	PcyM_0727800	PCYB_073540	cytochrome c oxidase subunit 5B, putative	TRUE
PVP01_0735200	Plasmodium exported protein, unknown function	NA	NA	NA	NA	NA	NA	NA	FALSE
PVP01_0107500	rhoptry-associated membrane antigen, putative	OG0003638	5	PBANKA_0804500	PF3D7_0707300	PcyM_0108200	PCYB_011430	rhoptry-associated membrane antigen	FALSE
PVP01_0737800	PIR protein	NA	NA	NA	NA	NA	NA	NA	FALSE
PVP01_0924800	thioredoxin-like protein, putative	OG0001681	5	PBANKA_0924100	PF3D7_1124200	PcyM_0928000	PCYB_093020	thioredoxin-like protein, putative	FALSE
PVP01_0528300	conserved protein, unknown function	OG0000424	5	PBANKA_0721000	PF3D7_0418900	PcyM_0529000	PCYB_053320	conserved protein, unknown function	TRUE
PVP01_0003150	PIR protein	NA	NA	NA	NA	NA	NA	NA	FALSE
PVP01_MIT01000	ribosomal RNA fragment	NA	NA	NA	NA	NA	NA	NA	FALSE
PVP01_0605300	flagellar outer arm dynein-associated protein, putative	OG0001025	5	PBANKA_0504300	PF3D7_1020100	PcyM_0606200	PCYB_061440	flagellar outer arm dynein-associated protein, putative	FALSE
PVP01_1424400	calcium-dependent protein kinase 3, putative	OG0002982	5	PBANKA_1421600	PF3D7_0715300	PcyM_1425500	PCYB_143230	calcium/calmodulin-dependent protein kinase, putative	FALSE
PVP01_0010360	PIR protein	NA	NA	NA	NA	NA	NA	NA	FALSE
PVP01_0915400	cyclin-dependent-like kinase CLK3, putative	OG0001742	5	PBANKA_0933000	PF3D7_1114700	PcyM_0917000	PCYB_092090	cyclin-dependent-like kinase CLK3	TRUE
PVP01_0003020	PIR protein	NA	NA	NA	NA	NA	NA	NA	FALSE
PVP01_1225800	conserved Plasmodium protein, unknown function	OG0004440	5	PBANKA_1343700	PF3D7_1328600	PcyM_1229300	PCYB_123380	conserved Plasmodium protein, unknown function	FALSE
PVP01_1031200	merozoite surface protein 3	NA	NA	NA	NA	NA	NA	NA	FALSE
PVP01_0503000	PIR protein	OG0005698	2	NA	NA	PcyM_0033400	NA	NA	FALSE
PVP01_0418800	pentafunctional AROM polypeptide, putative	OG0004767	4	PBANKA_0304000	NA	PcyM_0418500	PCYB_042390	NA	FALSE
PVP01_0001520	Plasmodium exported protein, unknown function	NA	NA	NA	NA	NA	NA	NA	FALSE
PVP01_0008440	Plasmodium exported protein, unknown function	NA	NA	NA	NA	NA	NA	NA	FALSE
PVP01_1407400	MORN repeat protein, putative	OG0004529	5	PBANKA_1405000	PF3D7_1306500	PcyM_1408000	PCYB_141600	MORN repeat protein, putative	FALSE
PVP01_1332100	lysine--tRNA ligase, putative	OG0003972	5	PBANKA_1025900	PF3D7_1416800	PcyM_1337500	PCYB_133990	lysine--tRNA ligase, putative	FALSE
PVP01_0830200	50S ribosomal protein L9, apicoplast, putative	OG0003380	5	PBANKA_0408100	PF3D7_0310000	PcyM_0833700	PCYB_083950	50S ribosomal protein L9, apicoplast, putative	FALSE
PVP01_1214700	exosome complex component RRP42, putative	OG0002796	5	PBANKA_1353500	PF3D7_1340100	PcyM_1216800	PCYB_122310	exosome complex component RRP42, putative	FALSE
PVP01_0945100	conserved Plasmodium protein, unknown function	OG0001582	5	PBANKA_0904600	PF3D7_1144400	PcyM_0949300	PCYB_095000	conserved Plasmodium protein, unknown function	FALSE
PVP01_1102400	conserved Plasmodium protein, unknown function	OG0004156	5	PBANKA_1145600	PF3D7_1369600	PcyM_1101500	PCYB_111090	conserved Plasmodium protein, unknown function	FALSE
PVP01_0920700	phosphoglycerate mutase, putative	OG0001711	5	PBANKA_0928100	PF3D7_1120100	PcyM_0923000	PCYB_092620	phosphoglycerate mutase, putative	TRUE
PVP01_1468600	ATP-dependent RNA helicase DRS1, putative	OG0003227	5	PBANKA_1464500	PF3D7_1251500	PcyM_1475600	PCYB_147590	ATP-dependent RNA helicase DRS1, putative	FALSE
PVP01_1265000	ADP-ribosylation factor, putative	OG0002542	5	PBANKA_1305900	PF3D7_1442000	PcyM_1273900	PCYB_127310	ADP-ribosylation factor, putative	TRUE
PVP01_0714600	conserved Plasmodium protein, unknown function	OG0001470	5	PBANKA_0817200	PF3D7_0916200	PcyM_0714400	PCYB_072380	conserved Plasmodium protein, unknown function	FALSE
PVP01_0004220	Plasmodium exported protein (PHISTc), unknown function	NA	NA	NA	NA	NA	NA	NA	FALSE
PVP01_0006350	Plasmodium exported protein, unknown function	NA	NA	NA	NA	NA	NA	NA	FALSE
PVP01_0710300	conserved Plasmodium protein, unknown function	OG0003667	5	PBANKA_0812900	PF3D7_0911800	PcyM_0710100	PCYB_071960	conserved Plasmodium protein, unknown function	TRUE
PVP01_1411600	ras-related protein Rab-5B, putative	OG0002900	5	PBANKA_1409100	PF3D7_1310600	PcyM_1412200	PCYB_142010	ras-related protein Rab-5B	FALSE
PVP01_0733300	conserved Plasmodium protein, unknown function	OG0003746	5	PBANKA_0835400	PF3D7_0934600	PcyM_0736500	PCYB_074190	conserved Plasmodium protein, unknown function	TRUE
PVP01_0002910	PIR protein	NA	NA	NA	NA	NA	NA	NA	FALSE
PVP01_1264000	serine/threonine protein kinase, putative	OG0002547	5	PBANKA_1306900	PF3D7_1443000	PcyM_1272900	PCYB_127210	serine/threonine protein kinase	FALSE
PVP01_1201000	PIR protein	NA	NA	NA	NA	NA	NA	NA	FALSE
PVP01_0416600	KRR1 small subunit processome component, putative	OG0000849	5	PBANKA_0305300	PF3D7_0208200	PcyM_0415400	PCYB_042170	KRR1 small subunit processome component, putative	FALSE
PVP01_0501300	PIR protein	NA	NA	NA	NA	NA	NA	NA	FALSE
PVP01_1219400	MSP7-like protein	NA	NA	NA	NA	NA	NA	NA	FALSE
PVP01_1420900	ATP-dependent Clp protease adapter protein ClpS, putative	OG0002963	5	PBANKA_1418400	PF3D7_1320100	PcyM_1421900	PCYB_142920	ATP-dependent Clp protease adapter protein ClpS	FALSE
PVP01_1433400	adrenodoxin-type ferredoxin, putative	OG0003037	5	PBANKA_1430400	PF3D7_1214600	PcyM_1434900	PCYB_144110	adrenodoxin-type ferredoxin, putative	FALSE
PVP01_0311000	conserved Plasmodium protein, unknown function	OG0003528	5	PBANKA_0612900	PF3D7_0411700	PcyM_0314100	PCYB_031900	conserved Plasmodium protein, unknown function	FALSE
PVP01_0916500	palmitoyltransferase DHHC9, putative	OG0001736	5	PBANKA_0932100	PF3D7_1115900	PcyM_0918300	PCYB_092200	palmitoyltransferase DHHC9	TRUE
PVP01_1447100	conserved protein, unknown function	OG0004647	5	PBANKA_1443700	PF3D7_1228900	PcyM_1450800	PCYB_145460	conserved protein, unknown function	FALSE
PVP01_1453000	CHCH domain-containing protein, putative	OG0003141	5	PBANKA_1449500	PF3D7_1234900	PcyM_1458200	PCYB_146060	CHCH domain-containing protein, putative	TRUE
PVP01_0535100	Plasmodium exported protein, unknown function	NA	NA	NA	NA	NA	NA	NA	FALSE
PVP01_0833900	glutaredoxin 1, putative	OG0000378	5	PBANKA_0404700	PF3D7_0306300	PcyM_0837900	PCYB_084290	glutaredoxin 1	FALSE
PVP01_0602300	rhoptry neck protein 12, putative	OG0003413	5	PBANKA_0501400	PF3D7_1017100	PcyM_0602400	PCYB_061140	rhoptry neck protein 12	FALSE
PVP01_1405000	DNA ligase I, putative	OG0002869	5	PBANKA_1402600	PF3D7_1304100	PcyM_1405600	PCYB_141360	DNA ligase I	FALSE
PVP01_0604400	conserved Plasmodium protein, unknown function	OG0004885	5	PBANKA_0503400	PF3D7_1019200	PcyM_0604700	PCYB_061350	conserved Plasmodium protein, unknown function	FALSE
PVP01_0500500	PIR protein, pseudogene	NA	NA	NA	NA	NA	NA	NA	FALSE
PVP01_1008700	acyl-CoA synthetase, putative	OG0002479	5	PBANKA_1239900	PF3D7_0525100	PcyM_1006500	PCYB_101650	acyl-CoA synthetase	FALSE
PVP01_0006030	PIR protein	NA	NA	NA	NA	NA	NA	NA	FALSE
PVP01_1204400	ubiquitin-activating enzyme E1, putative	OG0004510	5	PBANKA_1363200	PF3D7_1350400	PcyM_1205800	PCYB_121330	ubiquitin-activating enzyme E1, putative	FALSE
PVP01_1134800	major facilitator superfamily-related transporter, putative	OG0000746	5	PBANKA_0112500	PF3D7_0614300	PcyM_1136400	PCYB_114280	major facilitator superfamily-related transporter, putative	FALSE
PVP01_1011400	50S ribosomal protein L17, apicoplast, putative	OG0002467	5	PBANKA_1237200	PF3D7_0522500	PcyM_1009300	PCYB_101920	50S ribosomal protein L17, apicoplast, putative	FALSE
PVP01_0914000	conserved Plasmodium protein, unknown function	OG0001749	5	PBANKA_0934400	PF3D7_1113200	PcyM_0915500	PCYB_091950	conserved Plasmodium protein, unknown function	TRUE
PVP01_0105100	peptide chain release factor 2, putative	OG0003631	5	PBANKA_0802600	PF3D7_0704900	PcyM_0105500	PCYB_011230	peptide chain release factor 2	FALSE
PVP01_0800100	PIR protein	OG0005668	2	NA	NA	NA	PCYB_081010	NA	FALSE
PVP01_0830500	SECIS-binding protein 2, putative	OG0000955	5	PBANKA_0407800	PF3D7_0309700	PcyM_0834000	PCYB_083980	SECIS-binding protein 2, putative	FALSE
PVP01_0921200	DDRGK domain-containing protein, putative	OG0001708	5	PBANKA_0927700	PF3D7_1120600	PcyM_0923600	PCYB_092670	DDRGK domain-containing protein, putative	FALSE
PVP01_1464600	serine/threonine protein kinase, putative	OG0003207	5	PBANKA_1460500	PF3D7_1247500	PcyM_1471100	PCYB_147200	serine/threonine protein kinase, putative	TRUE
PVP01_1327500	DNA-directed RNA polymerase III subunit RPC6, putative	OG0001911	5	PBANKA_1021900	PF3D7_1421400	PcyM_1332300	PCYB_133580	DNA-directed RNA polymerase III subunit RPC6, putative	FALSE
PVP01_0009070	PIR protein	NA	NA	NA	NA	NA	NA	NA	FALSE
PVP01_1141900	MYND-type zinc finger protein, putative	OG0000707	5	PBANKA_0105700	PF3D7_0607100	PcyM_1145100	PCYB_114940	MYND-type zinc finger protein, putative	FALSE
PVP01_0001800	PIR protein	NA	NA	NA	NA	NA	NA	NA	FALSE
PVP01_1227200	ribonuclease P protein subunit RPR2, putative	OG0004435	5	PBANKA_1342400	PF3D7_1327200	PcyM_1231100	PCYB_123540	ribonuclease P protein subunit RPR2, putative	FALSE
PVP01_1135000	filamin domain-containing protein, putative	OG0000744	5	PBANKA_0112300	PF3D7_0614100	PcyM_1136700	PCYB_114300	filamin domain-containing protein, putative	FALSE
PVP01_0815200	CWC16 domain-containing protein, putative	OG0002329	5	PBANKA_1213500	PF3D7_1015100	PcyM_0815800	PCYB_082490	CWC16 domain-containing protein, putative	TRUE
PVP01_1446100	RNA pseudouridylate synthase, putative	OG0003107	5	PBANKA_1442600	PF3D7_1227900	PcyM_1449300	PCYB_145360	RNA pseudouridylate synthase, putative	FALSE
PVP01_0000010	PIR protein	NA	NA	NA	NA	NA	NA	NA	FALSE
PVP01_1248500	aminodeoxychorismate lyase, putative	OG0002628	5	PBANKA_1322100	PF3D7_1458400	PcyM_1255000	PCYB_125670	aminodeoxychorismate lyase	FALSE
PVP01_1447200	conserved Plasmodium protein, unknown function	OG0003114	5	PBANKA_1443600	PF3D7_1229000	PcyM_1450900	PCYB_145470	conserved Plasmodium membrane protein, unknown function	FALSE
PVP01_1317900	mitogen-activated protein kinase 1, putative	OG0000488	5	PBANKA_1013300	PF3D7_1431500	PcyM_1320700	PCYB_132720	mitogen-activated protein kinase 1	FALSE
PVP01_1307000	conserved Plasmodium protein, unknown function	OG0003508	5	PBANKA_0606400	PF3D7_1207900	PcyM_1308500	PCYB_131650	conserved Plasmodium protein, unknown function	FALSE
PVP01_0000780	PIR protein	NA	NA	NA	NA	NA	NA	NA	FALSE
PVP01_1231100	plasmepsin V	OG0002727	5	PBANKA_1338700	PF3D7_1323500	PcyM_1235800	PCYB_123930	plasmepsin V	TRUE
PVP01_0814500	MO15-related protein kinase, putative	OG0002325	5	PBANKA_1212800	PF3D7_1014400	PcyM_0815100	PCYB_082420	MO15-related protein kinase	FALSE
PVP01_1320700	heme/steroid binding domain containing protein, putative	OG0001886	5	PBANKA_1016000	PF3D7_1428700	PcyM_1323900	PCYB_133000	heme/steroid binding domain containing protein, putative	FALSE
PVP01_0522200	conserved Plasmodium protein, unknown function	OG0003598	5	PBANKA_0717700	PF3D7_0415700	PcyM_0523900	PCYB_052880	conserved Plasmodium protein, unknown function	FALSE
PVP01_1446800	merozoite surface protein 9	OG0004646	5	PBANKA_1443300	PF3D7_1228600	PcyM_1450200	PCYB_145430	merozoite surface protein 9	FALSE
PVP01_0202000	hypothetical protein	OG0005498	3	NA	NA	PcyM_0203300	PCYB_021160	NA	FALSE
PVP01_0718100	pyridoxal phosphate homeostasis protein, putative	OG0001489	5	PBANKA_0820600	PF3D7_0919700	PcyM_0718100	PCYB_072720	pyridoxal phosphate homeostasis protein, putative	FALSE
PVP01_1243000	ribosomal protein S6, mitochondrial, putative	OG0000325	5	PBANKA_1327200	PF3D7_1463800	PcyM_1249000	PCYB_125120	ribosomal protein S6, mitochondrial, putative	FALSE
PVP01_0003250	PIR protein	NA	NA	NA	NA	NA	NA	NA	FALSE
PVP01_0811700	heptatricopeptide repeat-containing protein, putative	OG0000535	5	PBANKA_1210000	PF3D7_1011600	PcyM_0811900	PCYB_082140	heptatricopeptide repeat-containing protein, putative	FALSE
PVP01_1325400	calcium-dependent protein kinase, putative	OG0000212	5	PBANKA_1019800	PF3D7_1423600	PcyM_1329400	PCYB_133370	calcium-dependent protein kinase, putative	TRUE
PVP01_1333400	conserved Plasmodium protein, unknown function	OG0003975	5	PBANKA_1027200	PF3D7_1415500	PcyM_1339200	PCYB_134120	conserved Plasmodium membrane protein, unknown function	FALSE
PVP01_1137900	ATP synthase-associated protein, putative	OG0000733	5	PBANKA_0109600	PF3D7_0611300	PcyM_1140100	PCYB_114560	ATP synthase-associated protein, putative	FALSE
PVP01_1458700	S-adenosylmethionine mitochondrial carrier protein, putative	OG0003173	5	PBANKA_1455000	PF3D7_1241600	PcyM_1464800	PCYB_146630	S-adenosylmethionine mitochondrial carrier protein	FALSE
PVP01_1136100	conserved Plasmodium protein, unknown function	OG0000281	5	PBANKA_0111300	PF3D7_0613000	PcyM_1138200	PCYB_114400	conserved Plasmodium protein, unknown function	TRUE
PVP01_1231800	conserved protein, unknown function	OG0002720	5	PBANKA_1338000	PF3D7_1322800	PcyM_1236600	PCYB_124000	conserved protein, unknown function	FALSE
PVP01_0411600	conserved protein, unknown function	OG0003342	4	PBANKA_0310200	PF3D7_0213300	PcyM_0409600	NA	conserved protein, unknown function	FALSE
PVP01_1217300	zinc finger protein, putative	OG0004464	5	PBANKA_1351200	PF3D7_1337400	PcyM_1220000	PCYB_122540	zinc finger protein, putative	FALSE
PVP01_0002640	Plasmodium exported protein, unknown function	NA	NA	NA	NA	NA	NA	NA	FALSE
PVP01_1136600	conserved Plasmodium protein, unknown function	OG0003273	5	PBANKA_0110800	PF3D7_0612500	PcyM_1138700	PCYB_114450	conserved Plasmodium protein, unknown function	FALSE
PVP01_0947200	oocyst rupture protein 1, putative	OG0003755	5	PBANKA_0902500	PF3D7_1146600	PcyM_0951600	PCYB_095200	oocyst rupture protein 1, putative	TRUE
PVP01_0003690	PIR protein	NA	NA	NA	NA	NA	NA	NA	FALSE
PVP01_1453900	peptidase, putative	OG0004671	5	PBANKA_1450400	PF3D7_1235800	PcyM_1459100	PCYB_146150	peptidase, putative	FALSE
PVP01_0108300	conserved Plasmodium protein, unknown function	OG0003641	4	PBANKA_0805300	NA	PcyM_0109000	PCYB_011510	NA	FALSE
PVP01_1238600	telomere length and silencing protein 1, putative	OG0002684	5	PBANKA_1331500	PF3D7_1468200	PcyM_1244000	PCYB_124680	telomere length and silencing protein 1, putative	TRUE
PVP01_0001540	Plasmodium exported protein, unknown function	NA	NA	NA	NA	NA	NA	NA	FALSE
[truncated: 4,864 more rows]
