# Supplementary material for: Single-cell RNA sequencing of Plasmodium vivax sporozoites reveals stage- and species-specific transcriptomic signatures
Source: PLoS Negl Trop Dis. 2022 Aug 4;16(8):e0010633. doi: 10.1371/journal.pntd.0010633 (PMC9380936; doi:10.1371/journal.pntd.0010633)
Supplement: S9 Table — (XLSX) [file pntd.0010633.s009.xlsx]

## Sheet: Sheet1
Supplementary Table S9. Conserved markers across P. vivax and P. falciparum
		P. vivax						P. falciparum
Cluster	Orthogroup	Gene::Description	p_val	avg_log2FC	pct.1	pct.2	p_val_adj	Gene::Description	p_val	avg_log2FC	pct.1	pct.2	p_val_adj
ORTHO_C1	OG0003890	PVP01_0304200::sporozoite-specific protein S10, putative	3.38e-60	4.07419	0.375	0.014	1.04e-56	PF3D7_0404800::sporozoite-specific protein S10, putative	1.64e-150	5.27269	0.924	0.07	5.03e-147
	OG0003907	PVP01_0307900::sporozoite invasion-associated protein 1, putative	5.5e-06	1.24485	0.357	0.141	0.0168702	PF3D7_0408600::sporozoite invasion-associated protein 1	9.17e-44	2.04723	0.515	0.079	2.81e-40
	OG0003294	PVP01_0210700::thrombospondin-related sporozoite protein, putative	3.41e-07	0.992753	0.804	0.512	0.00104547	PF3D7_0104000::thrombospondin-related sporozoite protein	1.17e-19	1.29074	0.712	0.312	3.58e-16
	OG0003439	PVP01_0609300::conserved Plasmodium protein, unknown function	1.29e-05	1.08957	0.446	0.205	0.0396907	PF3D7_1024100::conserved Plasmodium protein, unknown function	1.02e-06	1.09282	0.273	0.118	0.00313427
ORTHO_C2	OG0003785	PVP01_0938800::sporozoite surface protein essential for liver stage development, putative	4.63e-78	1.48467	0.871	0.305	1.42e-74	PF3D7_1137800::sporozoite surface protein essential for liver stage development, putative	2.19e-50	2.96866	0.565	0.173	6.72e-47
	OG0004064	PVP01_1132600::TRAP-like protein, putative	2.81e-73	1.93719	0.683	0.145	8.62e-70	PF3D7_0616500::TRAP-like protein	3.75e-54	1.08912	0.983	0.725	1.15e-50
	OG0004790	PVP01_0927000::DnaJ protein, putative	9.49e-41	1.57927	0.468	0.102	2.91e-37	PF3D7_1126300::DnaJ protein, putative	1.94e-13	0.674821	0.448	0.239	5.96e-10
	OG0003549	PVP01_0319000::conserved protein, unknown function	3.12e-39	1.16032	0.671	0.252	9.57e-36	PF3D7_0723300::conserved protein, unknown function	3.44e-30	0.934763	0.944	0.755	1.06e-26
	OG0004044	PVP01_1022600::conserved Plasmodium protein, unknown function	1.4e-32	0.757656	0.872	0.445	4.29e-29	PF3D7_0511400::conserved Plasmodium protein, unknown function	1.48e-12	0.515042	0.448	0.243	4.54e-09
	OG0003506	PVP01_1306500::conserved Plasmodium protein, unknown function	3.47e-27	0.96032	0.417	0.114	1.07e-23	PF3D7_1207400::conserved Plasmodium protein, unknown function	7.19e-11	1.58434	0.325	0.173	2.21e-07
	OG0004416	PVP01_1232200::conserved Plasmodium protein, unknown function	2.6e-15	0.570741	0.384	0.152	7.97e-12	PF3D7_1322400::conserved Plasmodium protein, unknown function	3.59e-22	1.21472	0.516	0.251	1.1e-18
	OG0003501	PVP01_1305400::conserved Plasmodium protein, unknown function	6.07e-17	0.776328	0.294	0.093	1.86e-13	PF3D7_1206300::conserved Plasmodium protein, unknown function	2.59e-11	0.791337	0.407	0.229	7.94e-08
