# Supplementary material for: Single-cell RNA sequencing of Plasmodium vivax sporozoites reveals stage- and species-specific transcriptomic signatures
Source: PLoS Negl Trop Dis. 2022 Aug 4;16(8):e0010633. doi: 10.1371/journal.pntd.0010633 (PMC9380936; doi:10.1371/journal.pntd.0010633)
Supplement: S10 Table — (XLSX) [file pntd.0010633.s010.xlsx]

## Sheet: Sheet1
Supplementary Table S10. Overlapping and species-specific genes detected in ORTHO clusters.
ORTHO_C1								ORTHO_C2								ORTHO_C3								ORTHO_C4
P. vivax only		P. falciparum only		Both species				P. vivax only		P. falciparum only		Both species				P. vivax only		P. falciparum only		Both species				P. vivax only		P. falciparum only		Both species
Orthogroup	Gene	Orthogroup	Gene	Orthogroup	Gene vivax	Gene falciparum		Orthogroup	Gene	Orthogroup	Gene	Orthogroup	Gene vivax	Gene falciparum		Orthogroup	Gene	Orthogroup	Gene	Orthogroup	Gene vivax	Gene falciparum		Orthogroup	Gene	Orthogroup	Gene	Orthogroup	Gene vivax	Gene falciparum
OG0005066	PVP01_0010840	OG0002450	PF3D7_0519300	OG0004462	PVP01_1218600	PF3D7_1336000		OG0005066	PVP01_0010840	OG0001577	PF3D7_1145200	OG0003618	PVP01_0103400	PF3D7_0703200		OG0005066	PVP01_0010840	OG0001390	PF3D7_0705300	OG0003618	PVP01_0103400	PF3D7_0703200		OG0003618	PVP01_0103400	OG0001828	PF3D7_0409200	OG0000540	PVP01_0113600	PF3D7_0806800
OG0003619	PVP01_0103500	OG0002373	PF3D7_0808400	OG0001391	PVP01_0105600	PF3D7_0705400		OG0003619	PVP01_0103500	OG0004907	PF3D7_1031500	OG0003626	PVP01_0104300	PF3D7_0704100		OG0003619	PVP01_0103500	OG0000757	PF3D7_0110500	OG0003626	PVP01_0104300	PF3D7_0704100		OG0003619	PVP01_0103500	OG0000842	PF3D7_0205900	OG0002390	PVP01_0115600	PF3D7_0804900
OG0000425	PVP01_0104400	OG0001155	PF3D7_1206500	OG0003216	PVP01_1466900	PF3D7_1249800		OG0003621	PVP01_0103800	OG0004654	PF3D7_1231200	OG0003628	PVP01_0104700	PF3D7_0704500		OG0003621	PVP01_0103800	OG0003292	PF3D7_0104200	OG0003628	PVP01_0104700	PF3D7_0704500		OG0003621	PVP01_0103800	OG0003606	PF3D7_0417400	OG0002407	PVP01_0118300	PF3D7_0801900
OG0001396	PVP01_0106600	OG0000844	PF3D7_0206100	OG0000441	PVP01_0723900	PF3D7_0925400		OG0000425	PVP01_0104400	OG0003183	PF3D7_1243700	OG0001390	PVP01_0105500	PF3D7_0705300		OG0000425	PVP01_0104400	OG0001816	PF3D7_0406100	OG0001391	PVP01_0105600	PF3D7_0705400		OG0003626	PVP01_0104300	OG0001421	PF3D7_0907200	OG0000765	PVP01_0205700	PF3D7_0109400
OG0001402	PVP01_0108100	OG0001855	PF3D7_1433600	OG0001712	PVP01_0920600	PF3D7_1120000		OG0001396	PVP01_0106600	OG0002009	PF3D7_0501800	OG0001391	PVP01_0105600	PF3D7_0705400		OG0001396	PVP01_0106600	OG0001828	PF3D7_0409200	OG0001392	PVP01_0105700	PF3D7_0705500		OG0000425	PVP01_0104400	OG0001464	PF3D7_0914700	OG0000363	PVP01_0207300	PF3D7_0107600
OG0002357	PVP01_0109000	OG0001496	PF3D7_0921700	OG0001200	PVP01_0311800	PF3D7_0716000		OG0003636	PVP01_0106800	OG0003299	PF3D7_0102800	OG0001392	PVP01_0105700	PF3D7_0705500		OG0003636	PVP01_0106800	OG0004955	PF3D7_0218200	OG0001397	PVP01_0106700	PF3D7_0706500		OG0001391	PVP01_0105600	OG0001518	PF3D7_0925200	OG0003293	PVP01_0210600	PF3D7_0104100
OG0004219	PVP01_0109700	OG0002559	PF3D7_1445900	OG0003546	PVP01_0317600	PF3D7_0721900		OG0001402	PVP01_0108100	OG0000366	PF3D7_0103100	OG0001397	PVP01_0106700	PF3D7_0706500		OG0001402	PVP01_0108100	OG0000865	PF3D7_0211700	OG0001401	PVP01_0107900	PF3D7_0707700		OG0001392	PVP01_0105700	OG0003856	PF3D7_1112100	OG0003294	PVP01_0210700	PF3D7_0104000
OG0002363	PVP01_0109900	OG0003846	PF3D7_1116000	OG0004961	PVP01_0504400	PF3D7_0830300		OG0002357	PVP01_0109000	OG0003297	PF3D7_0103200	OG0001401	PVP01_0107900	PF3D7_0707700		OG0001405	PVP01_0108600	OG0004900	PF3D7_0203100	OG0001406	PVP01_0108700	PF3D7_0708400		OG0001396	PVP01_0106600	OG0002474	PF3D7_0523900	OG0001228	PVP01_0316300	PF3D7_0720600
OG0004222	PVP01_0110600	OG0004487	PF3D7_1345100	OG0004328	PVP01_1260300	PF3D7_1446700		OG0004219	PVP01_0109700	OG0000795	PF3D7_0103400	OG0001406	PVP01_0108700	PF3D7_0708400		OG0002357	PVP01_0109000	OG0003583	PF3D7_0818800	OG0002360	PVP01_0109300	PF3D7_0709000		OG0001397	PVP01_0106700	OG0004125	PF3D7_1359900	OG0001233	PVP01_0317000	PF3D7_0721300
OG0004224	PVP01_0111100	OG0000746	PF3D7_0614300	OG0002566	PVP01_1259800	PF3D7_1447200		OG0000749	PVP01_0203400	OG0003296	PF3D7_0103500	OG0002360	PVP01_0109300	PF3D7_0709000		OG0004219	PVP01_0109700	OG0001348	PF3D7_0413900	OG0004218	PVP01_0109500	PF3D7_0709200		OG0001401	PVP01_0107900	OG0002141	PF3D7_0627100	OG0004778	PVP01_0317700	PF3D7_0722000
OG0004243	PVP01_0117200	OG0004429	PF3D7_1326200	OG0002752	PVP01_1224900	PF3D7_1329600		OG0000762	PVP01_0205400	OG0003295	PF3D7_0103600	OG0004218	PVP01_0109500	PF3D7_0709200		OG0002363	PVP01_0109900	OG0000398	PF3D7_1033600	OG0004813	PVP01_0110400	PF3D7_0710000		OG0001402	PVP01_0108100	OG0002752	PF3D7_1329600	OG0003549	PVP01_0319000	PF3D7_0723300
OG0000749	PVP01_0203400	OG0001533	PF3D7_0927700	OG0002776	PVP01_1218400	PF3D7_1336200		OG0000789	PVP01_0209600	OG0000794	PF3D7_0103700	OG0002363	PVP01_0109900	PF3D7_0709600		OG0000749	PVP01_0203400	OG0001421	PF3D7_0907200	OG0004222	PVP01_0110600	PF3D7_0710200		OG0001406	PVP01_0108700	OG0002578	PF3D7_1448900	OG0000892	PVP01_0407500	PF3D7_0217500
OG0000789	PVP01_0209600	OG0004560	PF3D7_1317300	OG0003750	PVP01_0948200	PF3D7_1147600		OG0000800	PVP01_0212300	OG0000793	PF3D7_0103900	OG0004813	PVP01_0110400	PF3D7_0710000		OG0000762	PVP01_0205400	OG0001439	PF3D7_0910600	OG0004224	PVP01_0111100	PF3D7_0710700		OG0002357	PVP01_0109000	OG0004317	PF3D7_1443100	OG0003348	PVP01_0410300	PF3D7_0214600
OG0000800	PVP01_0212300	OG0005103	PF3D7_0112800	OG0000720	PVP01_1139500	PF3D7_0609400		OG0004949	PVP01_0216200	OG0000792	PF3D7_0104400	OG0004222	PVP01_0110600	PF3D7_0710200		OG0000789	PVP01_0209600	OG0003667	PF3D7_0911800	OG0002374	PVP01_0112100	PF3D7_0808300		OG0002360	PVP01_0109300	OG0004293	PF3D7_1475400	OG0005203	PVP01_0504900	PF3D7_0829500
OG0004949	PVP01_0216200	OG0003788	PF3D7_1137400	OG0000534	PVP01_0810500	PF3D7_1010400		OG0003892	PVP01_0304400	OG0000786	PF3D7_0105500	OG0004224	PVP01_0111100	PF3D7_0710700		OG0001813	PVP01_0305200	OG0003676	PF3D7_0914500	OG0004228	PVP01_0112200	PF3D7_0808200		OG0004218	PVP01_0109500	OG0004576	PF3D7_0714200	OG0001264	PVP01_0505700	PF3D7_0828700
OG0003887	PVP01_0303700	OG0000902	PF3D7_0218700	OG0001378	PVP01_0528600	PF3D7_0419200		OG0001813	PVP01_0305200	OG0000785	PF3D7_0105600	OG0002374	PVP01_0112100	PF3D7_0808300		OG0001231	PVP01_0316800	OG0001464	PF3D7_0914700	OG0004234	PVP01_0113300	PF3D7_0807100		OG0004219	PVP01_0109700	OG0004670	PF3D7_1235400	OG0001324	PVP01_0516600	PF3D7_0818700
OG0001813	PVP01_0305200	OG0004059	PF3D7_0515100	OG0001147	PVP01_1304100	PF3D7_1205000		OG0001816	PVP01_0305500	OG0003289	PF3D7_0105800	OG0004228	PVP01_0112200	PF3D7_0808200		OG0001237	PVP01_0317800	OG0003684	PF3D7_0916400	OG0000540	PVP01_0113600	PF3D7_0806800		OG0002363	PVP01_0109900	OG0003154	PF3D7_1237100	OG0001325	PVP01_0516800	PF3D7_0818500
OG0001834	PVP01_0309100	OG0002461	PF3D7_0521200	OG0003051	PVP01_1436200	PF3D7_1217400		OG0001231	PVP01_0316800	OG0000784	PF3D7_0105900	OG0004234	PVP01_0113300	PF3D7_0807100		OG0001241	PVP01_0318400	OG0001509	PF3D7_0923600	OG0002388	PVP01_0115300	PF3D7_0805200		OG0004813	PVP01_0110400	OG0001388	PF3D7_0704600	OG0000403	PVP01_0529800	PF3D7_0420300
OG0003536	PVP01_0313000	OG0001071	PF3D7_1029300	OG0001226	PVP01_0315800	PF3D7_0720100		OG0001237	PVP01_0317800	OG0000783	PF3D7_0106000	OG0000540	PVP01_0113600	PF3D7_0806800		OG0000903	PVP01_0405600	OG0004209	PF3D7_0321600	OG0002390	PVP01_0115600	PF3D7_0804900		OG0004222	PVP01_0110600	OG0003782	PF3D7_1138700	OG0003419	PVP01_0603900	PF3D7_1018700
OG0001231	PVP01_0316800	OG0002145	PF3D7_0627700	OG0003482	PVP01_0531400	PF3D7_0422900		OG0001241	PVP01_0318400	OG0000781	PF3D7_0106200	OG0002388	PVP01_0115300	PF3D7_0805200		OG0000876	PVP01_0410900	OG0003645	PF3D7_0318500	OG0002393	PVP01_0116000	PF3D7_0804500		OG0004224	PVP01_0111100	OG0002435	PF3D7_0517400	OG0003430	PVP01_0607000	PF3D7_1021800
OG0001237	PVP01_0317800	OG0001014	PF3D7_1017900	OG0004063	PVP01_1132700	PF3D7_0616400		OG0001251	PVP01_0319900	OG0000780	PF3D7_0106300	OG0002390	PVP01_0115600	PF3D7_0804900		OG0000870	PVP01_0412600	OG0003873	PF3D7_1105600	OG0004241	PVP01_0116200	PF3D7_0804300		OG0002374	PVP01_0112100	OG0000718	PF3D7_0609000	OG0003439	PVP01_0609300	PF3D7_1024100
OG0001251	PVP01_0319900	OG0004472	PF3D7_1339900	OG0001360	PVP01_0522400	PF3D7_0415900		OG0001252	PVP01_0320000	OG0000779	PF3D7_0106400	OG0002393	PVP01_0116000	PF3D7_0804500		OG0000858	PVP01_0415000	OG0001738	PF3D7_1115200	OG0004243	PVP01_0117200	PF3D7_0803000		OG0004228	PVP01_0112200	OG0001942	PF3D7_1414700	OG0004771	PVP01_0613700	PF3D7_1028600
OG0000903	PVP01_0405600	OG0001459	PF3D7_0914000	OG0001106	PVP01_0619900	PF3D7_1034800		OG0000903	PVP01_0405600	OG0003288	PF3D7_0106500	OG0004241	PVP01_0116200	PF3D7_0804300		OG0000848	PVP01_0416700	OG0003828	PF3D7_1123500	OG0002400	PVP01_0117400	PF3D7_0802800		OG0002388	PVP01_0115300	OG0000914	PF3D7_0303200	OG0001076	PVP01_0615300	PF3D7_1030200
OG0004955	PVP01_0406800	OG0002916	PF3D7_1313000	OG0001463	PVP01_0713000	PF3D7_0914600		OG0000900	PVP01_0406500	OG0000778	PF3D7_0106700	OG0004243	PVP01_0117200	PF3D7_0803000		OG0000831	PVP01_0421200	OG0003792	PF3D7_1136000	OG0002407	PVP01_0118300	PF3D7_0801900		OG0004241	PVP01_0116200	OG0000944	PF3D7_0307900	OG0001077	PVP01_0615400	PF3D7_1030300
OG0003356	PVP01_0408100	OG0001403	PF3D7_0708000	OG0002474	PVP01_1010000	PF3D7_0523900		OG0003351	PVP01_0409100	OG0003287	PF3D7_0106900	OG0002400	PVP01_0117400	PF3D7_0802800		OG0000830	PVP01_0421300	OG0003753	PF3D7_1147000	OG0002408	PVP01_0118400	PF3D7_0801800		OG0004243	PVP01_0117200	OG0000958	PF3D7_0310300	OG0003467	PVP01_0618200	PF3D7_1033100
OG0003350	PVP01_0409400	OG0004399	PF3D7_1469900	OG0001967	PVP01_1339600	PF3D7_1409400		OG0000870	PVP01_0412600	OG0000776	PF3D7_0107100	OG0002407	PVP01_0118300	PF3D7_0801900		OG0001261	PVP01_0505300	OG0004257	PF3D7_0521600	OG0000755	PVP01_0204300	PF3D7_0110800		OG0002400	PVP01_0117400	OG0003647	PF3D7_0318300	OG0003408	PVP01_0703500	PF3D7_0905100
OG0000876	PVP01_0410900	OG0000764	PF3D7_0109500	OG0002232	PVP01_1105900	PF3D7_1366100		OG0004956	PVP01_0413400	OG0000775	PF3D7_0107200	OG0002408	PVP01_0118400	PF3D7_0801800		OG0001264	PVP01_0505700	OG0002452	PF3D7_0519500	OG0000359	PVP01_0204500	PF3D7_0110600		OG0002408	PVP01_0118400	OG0001410	PF3D7_0319100	OG0003704	PVP01_0720600	PF3D7_0922100
OG0003333	PVP01_0414000	OG0001716	PF3D7_1119400	OG0001977	PVP01_1341500	PF3D7_1407200		OG0000858	PVP01_0415000	OG0003286	PF3D7_0107700	OG0000755	PVP01_0204300	PF3D7_0110800		OG0001279	PVP01_0508000	OG0002077	PF3D7_0514500	OG0000758	PVP01_0204700	PF3D7_0110400		OG0000749	PVP01_0203400	OG0004206	PF3D7_0322400	OG0003712	PVP01_0723600	PF3D7_0925100
OG0000848	PVP01_0416700	OG0004707	PF3D7_1249700	OG0004457	PVP01_1220800	PF3D7_1333900		OG0000848	PVP01_0416700	OG0000773	PF3D7_0107800	OG0000359	PVP01_0204500	PF3D7_0110600		OG0001304	PVP01_0511800	OG0002246	PF3D7_1368200	OG0000765	PVP01_0205700	PF3D7_0109400		OG0000755	PVP01_0204300	OG0002338	PF3D7_0322900	OG0000537	PVP01_0814700	PF3D7_1014600
OG0003322	PVP01_0418300	OG0003658	PF3D7_0908900	OG0003828	PVP01_0924100	PF3D7_1123500		OG0000835	PVP01_0420500	OG0003285	PF3D7_0107900	OG0000757	PVP01_0204600	PF3D7_0110500		OG0001308	PVP01_0512300	OG0002211	PF3D7_1362400	OG0000770	PVP01_0206700	PF3D7_0108300		OG0000359	PVP01_0204500	OG0003893	PF3D7_0405200	OG0003368	PVP01_0835600	PF3D7_0304600
OG0000831	PVP01_0421200	OG0000695	PF3D7_0605200	OG0000883	PVP01_0409600	PF3D7_0215400		OG0000831	PVP01_0421200	OG0000362	PF3D7_0108400	OG0000758	PVP01_0204700	PF3D7_0110400		OG0001309	PVP01_0512400	OG0004123	PF3D7_1359500	OG0000363	PVP01_0207300	PF3D7_0107600		OG0000758	PVP01_0204700	OG0003902	PF3D7_0407600	OG0001794	PVP01_0905700	PF3D7_1104900
OG0000830	PVP01_0421300	OG0003013	PF3D7_0811400	OG0003149	PVP01_1454400	PF3D7_1236300		OG0000830	PVP01_0421300	OG0000769	PF3D7_0108600	OG0000765	PVP01_0205700	PF3D7_0109400		OG0003570	PVP01_0512900	OG0002151	PF3D7_0629100	OG0000364	PVP01_0210400	PF3D7_0104300		OG0000762	PVP01_0205400	OG0001835	PF3D7_0410300	OG0001783	PVP01_0908100	PF3D7_1107300
OG0001279	PVP01_0508000	OG0003345	PF3D7_0213800	OG0001854	PVP01_1315600	PF3D7_1433900		OG0001261	PVP01_0505300	OG0003283	PF3D7_0108700	OG0000770	PVP01_0206700	PF3D7_0108300		OG0001314	PVP01_0513100	OG0000516	PF3D7_0628300	OG0003293	PVP01_0210600	PF3D7_0104100		OG0000770	PVP01_0206700	OG0001376	PF3D7_0418700	OG0001766	PVP01_0911200	PF3D7_1110400
OG0001291	PVP01_0509700	OG0001921	PF3D7_1419100	OG0004361	PVP01_1249300	PF3D7_1457600		OG0001279	PVP01_0508000	OG0000361	PF3D7_0109100	OG0000363	PVP01_0207300	PF3D7_0107600		OG0003589	PVP01_0519000	OG0002141	PF3D7_0627100	OG0003294	PVP01_0210700	PF3D7_0104000		OG0000789	PVP01_0209600	OG0003477	PF3D7_0420600	OG0001691	PVP01_0923700	PF3D7_1123100
OG0000417	PVP01_0511000	OG0002437	PF3D7_0517600	OG0004257	PVP01_1012300	PF3D7_0521600		OG0001304	PVP01_0511800	OG0004731	PF3D7_0109300	OG0000364	PVP01_0210400	PF3D7_0104300		OG0003596	PVP01_0521300	OG0002137	PF3D7_0626500	OG0000365	PVP01_0210900	PF3D7_0103800		OG0000364	PVP01_0210400	OG0002029	PF3D7_0505400	OG0003815	PVP01_0929800	PF3D7_1129100
OG0001304	PVP01_0511800	OG0002040	PF3D7_0507100	OG0002758	PVP01_1223200	PF3D7_1331400		OG0001308	PVP01_0512300	OG0000764	PF3D7_0109500	OG0003292	PVP01_0210500	PF3D7_0104200		OG0001381	PVP01_0529100	OG0002118	PF3D7_0622900	OG0000799	PVP01_0212200	PF3D7_0726500		OG0000799	PVP01_0212200	OG0002040	PF3D7_0507100	OG0001635	PVP01_0933200	PF3D7_1132400
OG0001308	PVP01_0512300	OG0002495	PF3D7_0528100	OG0001349	PVP01_0520500	PF3D7_0414000		OG0001309	PVP01_0512400	OG0000759	PF3D7_0110100	OG0003293	PVP01_0210600	PF3D7_0104100		OG0004773	PVP01_0532200	OG0004515	PF3D7_1352000	OG0000367	PVP01_0212900	PF3D7_0727200		OG0000800	PVP01_0212300	OG0002074	PF3D7_0513800	OG0003785	PVP01_0938800	PF3D7_1137800
OG0003570	PVP01_0512900	OG0000986	PF3D7_0316500	OG0002992	PVP01_1425800	PF3D7_0814500		OG0003570	PVP01_0512900	OG0000360	PF3D7_0110200	OG0003294	PVP01_0210700	PF3D7_0104000		OG0005207	PVP01_0602000	OG0004458	PF3D7_1334000	OG0003307	PVP01_0214200	PF3D7_0728500		OG0000367	PVP01_0212900	OG0000546	PF3D7_0519800	OG0003781	PVP01_0939800	PF3D7_1138800
OG0001314	PVP01_0513100	OG0004311	PF3D7_1441300	OG0001587	PVP01_0944100	PF3D7_1143400		OG0001314	PVP01_0513100	OG0000754	PF3D7_0110900	OG0000365	PVP01_0210900	PF3D7_0103800		OG0001012	PVP01_0602400	OG0004457	PF3D7_1333900	OG0000811	PVP01_0214300	PF3D7_0728600		OG0003307	PVP01_0214200	OG0000553	PF3D7_0526500	OG0003753	PVP01_0947600	PF3D7_1147000
OG0000424	PVP01_0528300	OG0000710	PF3D7_0607400	OG0002171	PVP01_1117300	PF3D7_1354500		OG0000419	PVP01_0514800	OG0000358	PF3D7_0111000	OG0000799	PVP01_0212200	PF3D7_0726500		OG0005317	PVP01_0602900	OG0004452	PF3D7_1331500	OG0000283	PVP01_0214400	PF3D7_0728700		OG0000811	PVP01_0214300	OG0000355	PF3D7_0602100	OG0002505	PVP01_1004000	PF3D7_0529900
OG0001381	PVP01_0529100	OG0001223	PF3D7_0719800	OG0003412	PVP01_0701900	PF3D7_0903500		OG0001327	PVP01_0517100	OG0000753	PF3D7_0111200	OG0000367	PVP01_0212900	PF3D7_0727200		OG0001037	PVP01_0607600	OG0004420	PF3D7_1324300	OG0000818	PVP01_0215200	PF3D7_0729500		OG0000283	PVP01_0214400	OG0003251	PF3D7_0604100	OG0004050	PVP01_1021400	PF3D7_0512500
OG0003483	PVP01_0531500	OG0003025	PF3D7_1212300	OG0001046	PVP01_0609400	PF3D7_1024200		OG0003589	PVP01_0519000	OG0000752	PF3D7_0111300	OG0003307	PVP01_0214200	PF3D7_0728500		OG0003433	PVP01_0607900	OG0002719	PF3D7_1322500	OG0000369	PVP01_0216000	PF3D7_0730300		OG0000818	PVP01_0215200	OG0004982	PF3D7_0604600	OG0004044	PVP01_1022600	PF3D7_0511400
OG0004773	PVP01_0532200	OG0004406	PF3D7_1471300	OG0001085	PVP01_0616800	PF3D7_1031700		OG0001348	PVP01_0520400	OG0000751	PF3D7_0111400	OG0000811	PVP01_0214300	PF3D7_0728600		OG0005078	PVP01_0614100	OG0002712	PF3D7_1473900	OG0004949	PVP01_0216200	PF3D7_0730500		OG0000369	PVP01_0216000	OG0000713	PF3D7_0607700	OG0002036	PVP01_1027500	PF3D7_0506500
OG0001012	PVP01_0602400	OG0002569	PF3D7_1447600	OG0004396	PVP01_1238800	PF3D7_1468000		OG0003596	PVP01_0521300	OG0005103	PF3D7_0112800	OG0000283	PVP01_0214400	PF3D7_0728700		OG0003464	PVP01_0617300	OG0004413	PF3D7_1473300	OG0003881	PVP01_0302600	PF3D7_0403400		OG0004949	PVP01_0216200	OG0000726	PF3D7_0610200	OG0002153	PVP01_1120200	PF3D7_0629300
OG0001039	PVP01_0607800	OG0001029	PF3D7_1020700	OG0004445	PVP01_1224700	PF3D7_1329800		OG0001353	PVP01_0521400	OG0004958	PF3D7_0202400	OG0000818	PVP01_0215200	PF3D7_0729500		OG0001090	PVP01_0617600	OG0002703	PF3D7_1472100	OG0001805	PVP01_0302700	PF3D7_0403500		OG0001805	PVP01_0302700	OG0000728	PF3D7_0610800	OG0002147	PVP01_1121400	PF3D7_0628100
OG0003433	PVP01_0607900	OG0003789	PF3D7_1136600	OG0002979	PVP01_1423600	PF3D7_0714500		OG0003602	PVP01_0526100	OG0004901	PF3D7_0202900	OG0000369	PVP01_0216000	PF3D7_0730300		OG0001094	PVP01_0618400	OG0004399	PF3D7_1469900	OG0003883	PVP01_0303100	PF3D7_0403800		OG0001807	PVP01_0303200	OG0004248	PF3D7_0614600	OG0002142	PVP01_1122200	PF3D7_0627300
OG0005078	PVP01_0614100	OG0004486	PF3D7_1345000	OG0003610	PVP01_0527800	PF3D7_0418400		OG0001381	PVP01_0529100	OG0000829	PF3D7_0203700	OG0003881	PVP01_0302600	PF3D7_0403400		OG0000141	PVP01_0618500	OG0002672	PF3D7_1466400	OG0001807	PVP01_0303200	PF3D7_0403900		OG0003884	PVP01_0303300	OG0004066	PF3D7_0616900	OG0002131	PVP01_1124900	PF3D7_0624600
OG0003464	PVP01_0617300	OG0003988	PF3D7_1411100	OG0004555	PVP01_1415900	PF3D7_1315000		OG0004773	PVP01_0532200	OG0003315	PF3D7_0204000	OG0001805	PVP01_0302700	PF3D7_0403500		OG0000399	PVP01_0620000	OG0002627	PF3D7_1458300	OG0003884	PVP01_0303300	PF3D7_0404000		OG0003887	PVP01_0303700	OG0002123	PF3D7_0623700	OG0002091	PVP01_1131900	PF3D7_0617200
OG0001094	PVP01_0618400	OG0001044	PF3D7_1023600	OG0004041	PVP01_1023900	PF3D7_0510100		OG0005207	PVP01_0602000	OG0000833	PF3D7_0204200	OG0003883	PVP01_0303100	PF3D7_0403800		OG0001008	PVP01_0701600	OG0004336	PF3D7_1450400	OG0003887	PVP01_0303700	PF3D7_0404400		OG0003888	PVP01_0303800	OG0004093	PF3D7_0625500	OG0004064	PVP01_1132600	PF3D7_0616500
OG0000399	PVP01_0620000	OG0002724	PF3D7_1323200	OG0003564	PVP01_0509500	PF3D7_0824800		OG0001012	PVP01_0602400	OG0000837	PF3D7_0204900	OG0001807	PVP01_0303200	PF3D7_0403900		OG0003653	PVP01_0705500	OG0000564	PF3D7_1449600	OG0003888	PVP01_0303800	PF3D7_0404500		OG0003890	PVP01_0304200	OG0002140	PF3D7_0626900	OG0000690	PVP01_1144400	PF3D7_0604500
OG0001010	PVP01_0701400	OG0002404	PF3D7_0802300	OG0000435	PVP01_0716500	PF3D7_0918100		OG0005317	PVP01_0602900	OG0000838	PF3D7_0205200	OG0003884	PVP01_0303300	PF3D7_0404000		OG0001426	PVP01_0706500	OG0004299	PF3D7_1438400	OG0003890	PVP01_0304200	PF3D7_0404800		OG0001812	PVP01_0305100	OG0002154	PF3D7_0629400	OG0004985	PVP01_1210400	PF3D7_1344400
OG0001008	PVP01_0701600	OG0003940	PF3D7_1427200	OG0002299	PVP01_0810100	PF3D7_1010000		OG0001037	PVP01_0607600	OG0003319	PF3D7_0205300	OG0003887	PVP01_0303700	PF3D7_0404400		OG0003660	PVP01_0707800	OG0003916	PF3D7_1435500	OG0003892	PVP01_0304400	PF3D7_0405000		OG0001813	PVP01_0305200	OG0002356	PF3D7_0708500	OG0002820	PVP01_1210500	PF3D7_1344300
OG0003406	PVP01_0704200	OG0002263	PF3D7_1004000	OG0004109	PVP01_1118400	PF3D7_1353300		OG0003433	PVP01_0607900	OG0000839	PF3D7_0205400	OG0003888	PVP01_0303800	PF3D7_0404500		OG0001445	PVP01_0710000	OG0001861	PF3D7_1432800	OG0001812	PVP01_0305100	PF3D7_0405700		OG0001815	PVP01_0305400	OG0004575	PF3D7_0713900	OG0002807	PVP01_1212800	PF3D7_1342000
OG0003402	PVP01_0705100	OG0004144	PF3D7_1366700	OG0001176	PVP01_1309300	PF3D7_1210100		OG0005078	PVP01_0614100	OG0003320	PF3D7_0205600	OG0003890	PVP01_0304200	PF3D7_0404800		OG0003677	PVP01_0713300	OG0003934	PF3D7_1428500	OG0001815	PVP01_0305400	PF3D7_0406000		OG0001826	PVP01_0307800	OG0003534	PF3D7_0716700	OG0002800	PVP01_1213900	PF3D7_1340900
OG0003653	PVP01_0705500	OG0000630	PF3D7_1225800	OG0003876	PVP01_0905800	PF3D7_1105000		OG0003464	PVP01_0617300	OG0000843	PF3D7_0206000	OG0001812	PVP01_0305100	PF3D7_0405700		OG0000433	PVP01_0713400	OG0003951	PF3D7_1422600	OG0001826	PVP01_0307800	PF3D7_0408500		OG0003907	PVP01_0307900	OG0001223	PF3D7_0719800	OG0004462	PVP01_1218600	PF3D7_1336000
OG0001426	PVP01_0706500	OG0001857	PF3D7_1433300	OG0003519	PVP01_1311000	PF3D7_1211800		OG0001090	PVP01_0617600	OG0000844	PF3D7_0206100	OG0001815	PVP01_0305400	PF3D7_0406000		OG0003682	PVP01_0714500	OG0001938	PF3D7_1415100	OG0003907	PVP01_0307900	PF3D7_0408600		OG0000483	PVP01_0308000	OG0001238	PF3D7_0722300	OG0000592	PVP01_1218700	PF3D7_1335900
OG0003660	PVP01_0707800	OG0001674	PF3D7_1124900	OG0001658	PVP01_0928500	PF3D7_1127800		OG0001094	PVP01_0618400	OG0004899	PF3D7_0206900	OG0001826	PVP01_0307800	PF3D7_0408500		OG0001472	PVP01_0715000	OG0001972	PF3D7_1408700	OG0000483	PVP01_0308000	PF3D7_0408700		OG0001834	PVP01_0309100	OG0001240	PF3D7_0722600	OG0004987	PVP01_1221600	PF3D7_1333100
OG0000433	PVP01_0713400	OG0004177	PF3D7_1009900	OG0001159	PVP01_1306600	PF3D7_1207500		OG0000141	PVP01_0618500	OG0003325	PF3D7_0208300	OG0003907	PVP01_0307900	PF3D7_0408600		OG0001485	PVP01_0717500	OG0002860	PF3D7_1302600	OG0000485	PVP01_0308400	PF3D7_0409100		OG0001200	PVP01_0311800	OG0003550	PF3D7_0723800	OG0002713	PVP01_1232900	PF3D7_1321700
OG0003682	PVP01_0714500	OG0003953	PF3D7_1421900	OG0003662	PVP01_0708700	PF3D7_0910200		OG0000399	PVP01_0620000	OG0000852	PF3D7_0208700	OG0000483	PVP01_0308000	PF3D7_0408700		OG0003692	PVP01_0717900	OG0004537	PF3D7_1308400	OG0001834	PVP01_0309100	PF3D7_0409800		OG0003536	PVP01_0313000	OG0001256	PF3D7_0724900	OG0002685	PVP01_1238400	PF3D7_1468400
OG0001472	PVP01_0715000	OG0003347	PF3D7_0214500	OG0003159	PVP01_1456400	PF3D7_1238300		OG0000401	PVP01_0622400	OG0003329	PF3D7_0209000	OG0000485	PVP01_0308400	PF3D7_0409100		OG0000438	PVP01_0719400	OG0002954	PF3D7_1318400	OG0001200	PVP01_0311800	PF3D7_0716000		OG0001208	PVP01_0313300	OG0004242	PF3D7_0803500	OG0002682	PVP01_1238900	PF3D7_1467900
OG0001484	PVP01_0717400	OG0000868	PF3D7_0212000	OG0000941	PVP01_0833000	PF3D7_0307200		OG0001008	PVP01_0701600	OG0003330	PF3D7_0209500	OG0001828	PVP01_0308500	PF3D7_0409200		OG0001498	PVP01_0720500	OG0004583	PF3D7_0814300	OG0003536	PVP01_0313000	PF3D7_0717200		OG0001220	PVP01_0315200	OG0004239	PF3D7_0805100	OG0002652	PVP01_1245200	PF3D7_1461600
OG0001485	PVP01_0717500	OG0001358	PF3D7_0415500	OG0000524	PVP01_1112500	PF3D7_1359400		OG0003406	PVP01_0704200	OG0000857	PF3D7_0209600	OG0001834	PVP01_0309100	PF3D7_0409800		OG0001514	PVP01_0722800	OG0003055	PF3D7_1218100	OG0001208	PVP01_0313300	PF3D7_0717500		OG0001226	PVP01_0315800	OG0004231	PF3D7_0807600	OG0002637	PVP01_1247100	PF3D7_1459800
OG0000438	PVP01_0719400	OG0001283	PF3D7_0825800	OG0002454	PVP01_1014200	PF3D7_0519700		OG0003653	PVP01_0705500	OG0000373	PF3D7_0210100	OG0001200	PVP01_0311800	PF3D7_0716000		OG0001519	PVP01_0724100	OG0004653	PF3D7_1231000	OG0001220	PVP01_0315200	PF3D7_0719500		OG0003542	PVP01_0316000	OG0004598	PF3D7_0809200	OG0002591	PVP01_1256300	PF3D7_1450700
OG0001498	PVP01_0720500	OG0005076	PF3D7_1016800	OG0003760	PVP01_0945000	PF3D7_1144300		OG0001426	PVP01_0706500	OG0000374	PF3D7_0210600	OG0003536	PVP01_0313000	PF3D7_0717200		OG0003715	PVP01_0724400	OG0003136	PF3D7_1234000	OG0001226	PVP01_0315800	PF3D7_0720100		OG0000411	PVP01_0316100	OG0001344	PF3D7_0815600	OG0002579	PVP01_1257900	PF3D7_1449100
OG0003704	PVP01_0720600	OG0002339	PF3D7_0322300	OG0003229	PVP01_API02800	PF3D7_API02900		OG0003660	PVP01_0707800	OG0000866	PF3D7_0211800	OG0001208	PVP01_0313300	PF3D7_0717500		OG0001534	PVP01_0726300	OG0004670	PF3D7_1235400	OG0001227	PVP01_0315900	PF3D7_0720200		OG0001231	PVP01_0316800	OG0003563	PF3D7_0824900	OG0000322	PVP01_1262200	PF3D7_1444800
OG0001499	PVP01_0720700	OG0003421	PF3D7_1018900	OG0000496	PVP01_1333200	PF3D7_1415700		OG0001445	PVP01_0710000	OG0000868	PF3D7_0212000	OG0001220	PVP01_0315200	PF3D7_0719500		OG0003721	PVP01_0726600	OG0003154	PF3D7_1237100	OG0003542	PVP01_0316000	PF3D7_0720300		OG0003546	PVP01_0317600	OG0004962	PF3D7_0829600	OG0004995	PVP01_1264600	PF3D7_1442400
OG0001509	PVP01_0722100	OG0001571	PF3D7_1146800	OG0001192	PVP01_1312500	PF3D7_1437000		OG0003667	PVP01_0710300	OG0003337	PF3D7_0212100	OG0001226	PVP01_0315800	PF3D7_0720100		OG0004889	PVP01_0726650	OG0003192	PF3D7_1245000	OG0000411	PVP01_0316100	PF3D7_0720400		OG0001237	PVP01_0317800	OG0003654	PF3D7_0907100	OG0003504	PVP01_1306100	PF3D7_1207000
OG0001514	PVP01_0722800	OG0000951	PF3D7_0308900	OG0004112	PVP01_1117200	PF3D7_1354600		OG0000433	PVP01_0713400	OG0003338	PF3D7_0212400	OG0001227	PVP01_0315900	PF3D7_0720200		OG0000444	PVP01_0727500	OG0003216	PF3D7_1249800	OG0001228	PVP01_0316300	PF3D7_0720600		OG0003551	PVP01_0319800	OG0001430	PF3D7_0909200	OG0003510	PVP01_1307900	PF3D7_1208800
OG0003715	PVP01_0724400	OG0003111	PF3D7_1228500	OG0000265	PVP01_1405400	PF3D7_1304500		OG0003682	PVP01_0714500	OG0003339	PF3D7_0212500	OG0003542	PVP01_0316000	PF3D7_0720300		OG0005088	PVP01_0728800	OG0004714	PF3D7_1251600	OG0001233	PVP01_0317000	PF3D7_0721300		OG0001251	PVP01_0319900	OG0001444	PF3D7_0911100	OG0003917	PVP01_1314200	PF3D7_1435300
OG0003721	PVP01_0726600	OG0001918	PF3D7_1420000	OG0000980	PVP01_0825500	PF3D7_0314600		OG0001472	PVP01_0715000	OG0003340	PF3D7_0212700	OG0000411	PVP01_0316100	PF3D7_0720400		OG0000446	PVP01_0729000	OG0001394	PF3D7_0706000	OG0003546	PVP01_0317600	PF3D7_0721900		OG0001252	PVP01_0320000	OG0003705	PF3D7_0922800	OG0001862	PVP01_1316800	PF3D7_1432700
OG0004889	PVP01_0726650	OG0004234	PF3D7_0807100	OG0002854	PVP01_1202900	PF3D7_1351900		OG0001485	PVP01_0717500	OG0004884	PF3D7_0212800	OG0001228	PVP01_0316300	PF3D7_0720600		OG0003736	PVP01_0730200	OG0002383	PF3D7_0806300	OG0004778	PVP01_0317700	PF3D7_0722000		OG0000903	PVP01_0405600	OG0002319	PF3D7_1013100	OG0003948	PVP01_1325300	PF3D7_1423700
OG0000444	PVP01_0727500	OG0003273	PF3D7_0612500	OG0001327	PVP01_0517100	PF3D7_0818200		OG0000438	PVP01_0719400	OG0003341	PF3D7_0213000	OG0001233	PVP01_0317000	PF3D7_0721300		OG0005211	PVP01_0734300	OG0000777	PF3D7_0106800	OG0003549	PVP01_0319000	PF3D7_0723300		OG0003360	PVP01_0407400	OG0005076	PF3D7_1016800	OG0001926	PVP01_1331300	PF3D7_1417600
OG0001547	PVP01_0729600	OG0000714	PF3D7_0608000	OG0001353	PVP01_0521400	PF3D7_0414900		OG0001498	PVP01_0720500	OG0000873	PF3D7_0213200	OG0003546	PVP01_0317600	PF3D7_0721900		OG0002253	PVP01_0802200	OG0004794	PF3D7_0405300	OG0003551	PVP01_0319800	PF3D7_0724100		OG0003356	PVP01_0408100	OG0003416	PF3D7_1017800	OG0002870	PVP01_1405300	PF3D7_1304400
OG0003736	PVP01_0730200	OG0003114	PF3D7_1229000	OG0000212	PVP01_1325400	PF3D7_1423600		OG0001514	PVP01_0722800	OG0000874	PF3D7_0213400	OG0004778	PVP01_0317700	PF3D7_0722000		OG0004160	PVP01_0802600	OG0003904	PF3D7_0408000	OG0001251	PVP01_0319900	PF3D7_0724200		OG0003350	PVP01_0409400	OG0003420	PF3D7_1018800	OG0000265	PVP01_1405400	PF3D7_1304500
OG0000448	PVP01_0730800	OG0004122	PF3D7_1358400	OG0003185	PVP01_1461000	PF3D7_1243900		OG0003711	PVP01_0723500	OG0003343	PF3D7_0213500	OG0003549	PVP01_0319000	PF3D7_0723300		OG0002259	PVP01_0803200	OG0003552	PF3D7_0724500	OG0000893	PVP01_0407300	PF3D7_0217700		OG0000883	PVP01_0409600	OG0001022	PF3D7_1019800	OG0002958	PVP01_1420000	PF3D7_1319100
OG0005211	PVP01_0734300	OG0000884	PF3D7_0215500	OG0002282	PVP01_0806800	PF3D7_1007100		OG0001519	PVP01_0724100	OG0003345	PF3D7_0213800	OG0003551	PVP01_0319800	PF3D7_0724100		OG0004163	PVP01_0804200	OG0003553	PF3D7_0724600	OG0003360	PVP01_0407400	PF3D7_0217600		OG0000881	PVP01_0410000	OG0001025	PF3D7_1020100	OG0003003	PVP01_1427300	PF3D7_0813000
OG0002253	PVP01_0802200	OG0000431	PF3D7_0909000	OG0003378	PVP01_0831100	PF3D7_0309100		OG0003715	PVP01_0724400	OG0003346	PF3D7_0213900	OG0004955	PVP01_0406800	PF3D7_0218200		OG0002279	PVP01_0806500	OG0003555	PF3D7_0725400	OG0000892	PVP01_0407500	PF3D7_0217500		OG0000871	PVP01_0412300	OG0003424	PF3D7_1020200	OG0003049	PVP01_1435700	PF3D7_1216900
OG0004160	PVP01_0802600	OG0004280	PF3D7_0527600	OG0000818	PVP01_0215200	PF3D7_0729500		OG0003721	PVP01_0726600	OG0000877	PF3D7_0214100	OG0000893	PVP01_0407300	PF3D7_0217700		OG0002286	PVP01_0807300	OG0003349	PF3D7_0214700	OG0003356	PVP01_0408100	PF3D7_0216900		OG0000865	PVP01_0413200	OG0001030	PF3D7_1020800	OG0003130	PVP01_1450600	PF3D7_1232400
OG0002279	PVP01_0806500	OG0001996	PF3D7_1403700	OG0004505	PVP01_1205800	PF3D7_1349000		OG0004889	PVP01_0726650	OG0000879	PF3D7_0214400	OG0003360	PVP01_0407400	PF3D7_0217600		OG0002309	PVP01_0811800	OG0003344	PF3D7_0213600	OG0003350	PVP01_0409400	PF3D7_0215600		OG0003333	PVP01_0414000	OG0003428	PF3D7_1021500	OG0003189	PVP01_1461700	PF3D7_1244600
OG0002286	PVP01_0807300	OG0001382	PF3D7_0419800	OG0001141	PVP01_1302800	PF3D7_1203500		OG0000444	PVP01_0727500	OG0003347	PF3D7_0214500	OG0000892	PVP01_0407500	PF3D7_0217500		OG0004185	PVP01_0812900	OG0000370	PF3D7_0204500	OG0000883	PVP01_0409600	PF3D7_0215400		OG0000862	PVP01_0414200	OG0001034	PF3D7_1021900	OG0003207	PVP01_1464600	PF3D7_1247500
OG0004175	PVP01_0809500	OG0001326	PF3D7_0818400	OG0004964	PVP01_0602100	PF3D7_1016900		OG0005088	PVP01_0728800	OG0000882	PF3D7_0215200	OG0003356	PVP01_0408100	PF3D7_0216900		OG0000315	PVP01_0813100	OG0001275	PF3D7_0826700	OG0000881	PVP01_0410000	PF3D7_0214900		OG0000858	PVP01_0415000	OG0001035	PF3D7_1022000	OG0002383	PVP01_0114200	PF3D7_0806300
OG0002309	PVP01_0811800	OG0003353	PF3D7_0216200	OG0003170	PVP01_1458000	PF3D7_1239900		OG0000446	PVP01_0729000	OG0000884	PF3D7_0215500	OG0003350	PVP01_0409400	PF3D7_0215600		OG0000536	PVP01_0814000	OG0003417	PF3D7_1018100	OG0003348	PVP01_0410300	PF3D7_0214600		OG0004855	PVP01_0415100	OG0001040	PF3D7_1022800	OG0003553	PVP01_0320300	PF3D7_0724600
OG0000315	PVP01_0813100	OG0003539	PF3D7_0718000	OG0002059	PVP01_1022700	PF3D7_0511300		OG0003736	PVP01_0730200	OG0000252	PF3D7_0216000	OG0000883	PVP01_0409600	PF3D7_0215400		OG0000539	PVP01_0820600	OG0004907	PF3D7_1031500	OG0000871	PVP01_0412300	PF3D7_0212600		OG0000853	PVP01_0415700	OG0003447	PF3D7_1026100	OG0003432	PVP01_0607500	PF3D7_1022300
OG0004186	PVP01_0813300	OG0002730	PF3D7_1324000	OG0002139	PVP01_1122700	PF3D7_0626800		OG0005211	PVP01_0734300	OG0003352	PF3D7_0216100	OG0000881	PVP01_0410000	PF3D7_0214900		OG0001418	PVP01_0823100	OG0002287	PF3D7_1007700	OG0003333	PVP01_0414000	PF3D7_0210900		OG0000851	PVP01_0416300	OG0003448	PF3D7_1026300	OG0001075	PVP01_0615200	PF3D7_1030100
OG0002343	PVP01_0818400	OG0003860	PF3D7_1110800	OG0002156	PVP01_1119700	PF3D7_0629800		OG0002253	PVP01_0802200	OG0003353	PF3D7_0216200	OG0003348	PVP01_0410300	PF3D7_0214600		OG0000979	PVP01_0825600	OG0004203	PF3D7_0322700	OG0000862	PVP01_0414200	PF3D7_0210700		OG0000848	PVP01_0416700	OG0001789	PF3D7_1106100	OG0004409	PVP01_1234300	PF3D7_1472500
OG0001418	PVP01_0823100	OG0002725	PF3D7_1323300	OG0000799	PVP01_0212200	PF3D7_0726500		OG0004160	PVP01_0802600	OG0003354	PF3D7_0216300	OG0000876	PVP01_0410900	PF3D7_0214000		OG0004769	PVP01_0825900	OG0001722	PF3D7_1118500	OG0004855	PVP01_0415100	PF3D7_0209700		OG0003324	PVP01_0418000	OG0001765	PF3D7_1110500	OG0001141	PVP01_1302800	PF3D7_1203500
OG0000979	PVP01_0825600	OG0003552	PF3D7_0724500	OG0004518	PVP01_1403100	PF3D7_1302200		OG0002279	PVP01_0806500	OG0000887	PF3D7_0216400	OG0000871	PVP01_0412300	PF3D7_0212600		OG0000977	PVP01_0826200	OG0000453	PF3D7_1147200	OG0000853	PVP01_0415700	PF3D7_0209100		OG0000847	PVP01_0418100	OG0001759	PF3D7_1111200	OG0003092	PVP01_1443100	PF3D7_1224900
OG0004769	PVP01_0825900	OG0003764	PF3D7_1143500	OG0001228	PVP01_0316300	PF3D7_0720600		OG0002286	PVP01_0807300	OG0003355	PF3D7_0216500	OG0000865	PVP01_0413200	PF3D7_0211700		OG0000915	PVP01_0836900	OG0000555	PF3D7_0528400	OG0000851	PVP01_0416300	PF3D7_0208500		OG0003323	PVP01_0418200	OG0000476	PF3D7_1111600	OG0000634	PVP01_1449300	PF3D7_1231100
OG0000927	PVP01_0834900	OG0003227	PF3D7_1251500	OG0003542	PVP01_0316000	PF3D7_0720300		OG0000534	PVP01_0810500	OG0000888	PF3D7_0216600	OG0003333	PVP01_0414000	PF3D7_0210900		OG0000906	PVP01_0837900	OG0002435	PF3D7_0517400	OG0000850	PVP01_0416400	PF3D7_0208400		OG0003322	PVP01_0418300	OG0003838	PF3D7_1118700
OG0000915	PVP01_0836900	OG0003713	PF3D7_0925300	OG0004819	PVP01_1003900	PF3D7_0530000		OG0002309	PVP01_0811800	OG0003357	PF3D7_0217000	OG0000862	PVP01_0414200	PF3D7_0210700		OG0001803	PVP01_0903900	OG0002156	PF3D7_0629800	OG0003324	PVP01_0418000	PF3D7_0207300		OG0003321	PVP01_0418700	OG0001703	PF3D7_1121400
OG0000908	PVP01_0837700	OG0003250	PF3D7_0604000	OG0003057	PVP01_1437200	PF3D7_1218400		OG0004185	PVP01_0812900	OG0000890	PF3D7_0217100	OG0004855	PVP01_0415100	PF3D7_0209700		OG0001791	PVP01_0906600	OG0004090	PF3D7_0624900	OG0000847	PVP01_0418100	PF3D7_0207200		OG0000372	PVP01_0418900	OG0001649	PF3D7_1129500
OG0001803	PVP01_0903900	OG0004901	PF3D7_0202900	OG0004353	PVP01_1251200	PF3D7_1455700		OG0000315	PVP01_0813100	OG0003358	PF3D7_0217200	OG0000853	PVP01_0415700	PF3D7_0209100		OG0001756	PVP01_0912600	OG0002093	PF3D7_0617800	OG0003323	PVP01_0418200	PF3D7_0207100		OG0000836	PVP01_0420400	OG0003814	PF3D7_1129600
OG0001756	PVP01_0912600	OG0004814	PF3D7_0808450	OG0001075	PVP01_0615200	PF3D7_1030100		OG0004190	PVP01_0813900	OG0000894	PF3D7_0217800	OG0000851	PVP01_0416300	PF3D7_0208500		OG0003852	PVP01_0913700	OG0004065	PF3D7_0616700	OG0003322	PVP01_0418300	PF3D7_0207000		OG0000832	PVP01_0421000	OG0001646	PF3D7_1130100
OG0003852	PVP01_0913700	OG0002821	PF3D7_1344500	OG0003583	PVP01_0515500	PF3D7_0818800		OG0000536	PVP01_0814000	OG0000899	PF3D7_0218400	OG0000850	PVP01_0416400	PF3D7_0208400		OG0000474	PVP01_0914900	OG0004062	PF3D7_0616300	OG0003321	PVP01_0418700	PF3D7_0206500		OG0000831	PVP01_0421200	OG0003784	PF3D7_1137900
OG0000474	PVP01_0914900	OG0002083	PF3D7_0515700	OG0002361	PVP01_0109400	PF3D7_0709100		OG0004192	PVP01_0814600	OG0000901	PF3D7_0218600	OG0003324	PVP01_0418000	PF3D7_0207300		OG0000473	PVP01_0915000	OG0002849	PF3D7_1351000	OG0000372	PVP01_0418900	PF3D7_0206200		OG0000830	PVP01_0421300	OG0001134	PF3D7_1202000
OG0000473	PVP01_0915000	OG0004620	PF3D7_1218900	OG0003056	PVP01_1437000	PF3D7_1218200		OG0004812	PVP01_0817200	OG0003363	PF3D7_0219500	OG0000847	PVP01_0418100	PF3D7_0207200		OG0001742	PVP01_0915400	OG0000580	PF3D7_1323700	OG0000842	PVP01_0419200	PF3D7_0205900		OG0003313	PVP01_0421700	OG0000404	PF3D7_1202500
OG0001742	PVP01_0915400	OG0004519	PF3D7_1302500	OG0001995	PVP01_1344700	PF3D7_1404100		OG0002346	PVP01_0819300	OG0004780	PF3D7_0301800	OG0003323	PVP01_0418200	PF3D7_0207100		OG0001723	PVP01_0918900	OG0002710	PF3D7_1473400	OG0000836	PVP01_0420400	PF3D7_0204700		OG0004900	PVP01_0422000	OG0004886	PF3D7_1203400
OG0001724	PVP01_0918800	OG0002824	PF3D7_1345200	OG0003842	PVP01_0917900	PF3D7_1117300		OG0000539	PVP01_0820600	OG0000912	PF3D7_0303000	OG0003322	PVP01_0418300	PF3D7_0207000		OG0003836	PVP01_0920300	OG0004405	PF3D7_1471100	OG0000832	PVP01_0421000	PF3D7_0204100		OG0004961	PVP01_0504400	OG0003494	PF3D7_1204100
OG0001723	PVP01_0918900	OG0001529	PF3D7_0927200	OG0004088	PVP01_1124800	PF3D7_0624700		OG0001418	PVP01_0823100	OG0000914	PF3D7_0303200	OG0003321	PVP01_0418700	PF3D7_0206500		OG0001711	PVP01_0920700	OG0004385	PF3D7_1464800	OG0003313	PVP01_0421700	PF3D7_0203400		OG0001263	PVP01_0505600	OG0001150	PF3D7_1205500
OG0003836	PVP01_0920300	OG0004456	PF3D7_1333600	OG0002148	PVP01_1121300	PF3D7_0628200		OG0000979	PVP01_0825600	OG0000917	PF3D7_0303500	OG0000372	PVP01_0418900	PF3D7_0206200		OG0003835	PVP01_0920800	OG0002594	PF3D7_1451300	OG0004961	PVP01_0504400	PF3D7_0830300		OG0001268	PVP01_0506100	OG0001179	PF3D7_1210900
OG0001711	PVP01_0920700	OG0003608	PF3D7_0418000	OG0004672	PVP01_1454200	PF3D7_1236100		OG0004769	PVP01_0825900	OG0000919	PF3D7_0303700	OG0000842	PVP01_0419200	PF3D7_0205900		OG0004858	PVP01_0921000	OG0004315	PF3D7_1442600	OG0005203	PVP01_0504900	PF3D7_0829500		OG0001274	PVP01_0507400	OG0003047	PF3D7_1216000
OG0003835	PVP01_0920800	OG0001439	PF3D7_0910600	OG0001450	PVP01_0710900	PF3D7_0912500		OG0000977	PVP01_0826200	OG0000922	PF3D7_0304000	OG0000836	PVP01_0420400	PF3D7_0204700		OG0003829	PVP01_0923300	OG0001927	PF3D7_1417500	OG0001263	PVP01_0505600	PF3D7_0828800		OG0001279	PVP01_0508000	OG0004611	PF3D7_1216500
OG0001710	PVP01_0920900	OG0002269	PF3D7_1004900	OG0000322	PVP01_1262200	PF3D7_1444800		OG0003383	PVP01_0829200	OG0000923	PF3D7_0304200	OG0000832	PVP01_0421000	PF3D7_0204100		OG0001680	PVP01_0924900	OG0004002	PF3D7_1405700	OG0001268	PVP01_0506100	PF3D7_0828300		OG0001280	PVP01_0508200	OG0004633	PF3D7_1224700
OG0004858	PVP01_0921000	OG0002571	PF3D7_1447900	OG0000862	PVP01_0414200	PF3D7_0210700		OG0003366	PVP01_0836100	OG0003367	PF3D7_0304300	OG0003313	PVP01_0421700	PF3D7_0203400		OG0005097	PVP01_0925500	OG0004010	PF3D7_1403600	OG0001274	PVP01_0507400	PF3D7_0827000		OG0001287	PVP01_0508900	OG0004634	PF3D7_1225000
OG0001709	PVP01_0921100	OG0001412	PF3D7_0318600	OG0003081	PVP01_1441600	PF3D7_1223400		OG0000915	PVP01_0836900	OG0003370	PF3D7_0304900	OG0004900	PVP01_0422000	PF3D7_0203100		OG0001670	PVP01_0926100	OG0004519	PF3D7_1302500	OG0001280	PVP01_0508200	PF3D7_0826100		OG0003562	PVP01_0509300	OG0004637	PF3D7_1225600
OG0003832	PVP01_0922200	OG0004216	PF3D7_0319700	OG0001661	PVP01_0927800	PF3D7_1127100		OG0000906	PVP01_0837900	OG0000926	PF3D7_0305000	OG0004961	PVP01_0504400	PF3D7_0830300		OG0000468	PVP01_0926700	OG0000329	PF3D7_1311800	OG0001286	PVP01_0508800	PF3D7_0825500		OG0003564	PVP01_0509500	OG0003097	PF3D7_1226000
OG0005097	PVP01_0925500	OG0004240	PF3D7_0804400	OG0001614	PVP01_0937800	PF3D7_1136900		OG0001803	PVP01_0903900	OG0003371	PF3D7_0305100	OG0005203	PVP01_0504900	PF3D7_0829500		OG0001665	PVP01_0926900	OG0000630	PF3D7_1225800	OG0001287	PVP01_0508900	PF3D7_0825400		OG0001304	PVP01_0511800	OG0000635	PF3D7_1231300
OG0000468	PVP01_0926700	OG0001203	PF3D7_0716600	OG0003182	PVP01_1460600	PF3D7_1243500		OG0000480	PVP01_0905500	OG0003372	PF3D7_0305200	OG0001263	PVP01_0505600	PF3D7_0828800		OG0001662	PVP01_0927700	OG0004654	PF3D7_1231200	OG0003562	PVP01_0509300	PF3D7_0825000		OG0001308	PVP01_0512300	OG0000638	PF3D7_1233600
OG0001665	PVP01_0926900	OG0000232	PF3D7_0816600	OG0002334	PVP01_0816500	PF3D7_0323700		OG0001791	PVP01_0906600	OG0000931	PF3D7_0305700	OG0001264	PVP01_0505700	PF3D7_0828700		OG0001661	PVP01_0927800	OG0003146	PF3D7_1235900	OG0003564	PVP01_0509500	PF3D7_0824800		OG0003570	PVP01_0512900	OG0003143	PF3D7_1235500
OG0004587	PVP01_0927100	OG0004267	PF3D7_0524100	OG0001149	PVP01_1304300	PF3D7_1205200		OG0001756	PVP01_0912600	OG0000932	PF3D7_0305800	OG0001268	PVP01_0506100	PF3D7_0828300		OG0001657	PVP01_0928700	OG0000768	PF3D7_0108800	OG0001291	PVP01_0509700	PF3D7_0824600		OG0001314	PVP01_0513100	OG0004689	PF3D7_1242400
OG0001657	PVP01_0928700	OG0004545	PF3D7_1310200	OG0000261	PVP01_1261600	PF3D7_1445400		OG0003852	PVP01_0913700	OG0003373	PF3D7_0306100	OG0001274	PVP01_0507400	PF3D7_0827000		OG0001648	PVP01_0930500	OG0001301	PF3D7_0823000	OG0000417	PVP01_0511000	PF3D7_0823300		OG0003572	PVP01_0513200	OG0005126	PF3D7_1243400
OG0001648	PVP01_0930500	OG0004583	PF3D7_0814300	OG0002712	PVP01_1233000	PF3D7_1473900		OG0000474	PVP01_0914900	OG0000934	PF3D7_0306200	OG0001280	PVP01_0508200	PF3D7_0826100		OG0000298	PVP01_0937400	OG0003437	PF3D7_1023800	OG0003572	PVP01_0513200	PF3D7_0821100		OG0001323	PVP01_0514700	OG0003212	PF3D7_1248600
OG0003801	PVP01_0933900	OG0002785	PF3D7_1338000	OG0003618	PVP01_0103400	PF3D7_0703200		OG0000473	PVP01_0915000	OG0000938	PF3D7_0306800	OG0001286	PVP01_0508800	PF3D7_0825500		OG0005098	PVP01_0940300	OG0002478	PF3D7_0524900	OG0001323	PVP01_0514700	PF3D7_0819600		OG0003583	PVP01_0515500	OG0002886	PF3D7_1307700
OG0000298	PVP01_0937400	OG0004411	PF3D7_1472800	OG0002092	PVP01_1131800	PF3D7_0617300		OG0001742	PVP01_0915400	OG0000939	PF3D7_0306900	OG0001287	PVP01_0508900	PF3D7_0825400		OG0001595	PVP01_0942400	OG0002009	PF3D7_0501800	OG0001324	PVP01_0516600	PF3D7_0818700		OG0000420	PVP01_0516700	OG0002749	PF3D7_1329100
OG0005098	PVP01_0940300	OG0004643	PF3D7_1227500	OG0001181	PVP01_1310600	PF3D7_1211400		OG0001723	PVP01_0918900	OG0003375	PF3D7_0307600	OG0003562	PVP01_0509300	PF3D7_0825000		OG0001594	PVP01_0942500	OG0004451	PF3D7_1331200	OG0000420	PVP01_0516700	PF3D7_0818600		OG0001327	PVP01_0517100	OG0004450	PF3D7_1331100
OG0001595	PVP01_0942400	OG0000850	PF3D7_0208400	OG0004677	PVP01_1455600	PF3D7_1237500		OG0003836	PVP01_0920300	OG0003376	PF3D7_0307700	OG0003564	PVP01_0509500	PF3D7_0824800		OG0001580	PVP01_0945300	OG0002753	PF3D7_1330500	OG0001325	PVP01_0516800	PF3D7_0818500		OG0003585	PVP01_0517200	OG0004465	PF3D7_1337500
OG0001594	PVP01_0942500	OG0003202	PF3D7_1246800	OG0003677	PVP01_0713300	PF3D7_0914900		OG0001711	PVP01_0920700	OG0000944	PF3D7_0307900	OG0001291	PVP01_0509700	PF3D7_0824600		OG0001578	PVP01_0945600	OG0001141	PF3D7_1203500	OG0001327	PVP01_0517100	PF3D7_0818200		OG0001349	PVP01_0520500	OG0004468	PF3D7_1338900
OG0005219	PVP01_0945500	OG0000678	PF3D7_0602800	OG0000768	PVP01_0206200	PF3D7_0108800		OG0004858	PVP01_0921000	OG0003377	PF3D7_0308300	OG0000417	PVP01_0511000	PF3D7_0823300		OG0000257	PVP01_0948400	OG0000496	PF3D7_1415700	OG0003585	PVP01_0517200	PF3D7_0818100		OG0003594	PVP01_0520900	OG0002809	PF3D7_1342400
OG0001578	PVP01_0945600	OG0000814	PF3D7_0729000	OG0001877	PVP01_1319300	PF3D7_1430100		OG0001706	PVP01_0921700	OG0000948	PF3D7_0308500	OG0003572	PVP01_0513200	PF3D7_0821100		OG0002512	PVP01_1002700	OG0001942	PF3D7_1414700	OG0001349	PVP01_0520500	PF3D7_0414000		OG0001351	PVP01_0521000	OG0002858	PF3D7_1352800
OG0003752	PVP01_0947700	OG0000769	PF3D7_0108600	OG0004331	PVP01_1259200	PF3D7_1447800		OG0003829	PVP01_0923300	OG0000949	PF3D7_0308700	OG0001323	PVP01_0514700	PF3D7_0819600		OG0002507	PVP01_1003300	OG0001945	PF3D7_1414300	OG0003594	PVP01_0520900	PF3D7_0414400		OG0001352	PVP01_0521100	OG0004132	PF3D7_1362600
OG0002512	PVP01_1002700	OG0003997	PF3D7_1408200	OG0004653	PVP01_1449200	PF3D7_1231000		OG0001680	PVP01_0924900	OG0000951	PF3D7_0308900	OG0003583	PVP01_0515500	PF3D7_0818800		OG0002497	PVP01_1005500	OG0003299	PF3D7_0102800	OG0001351	PVP01_0521000	PF3D7_0414500		OG0003595	PVP01_0521200	OG0002241	PF3D7_1367500
OG0002480	PVP01_1008600	OG0002704	PF3D7_1472200	OG0004427	PVP01_1228500	PF3D7_1326000		OG0005097	PVP01_0925500	OG0000952	PF3D7_0309000	OG0001324	PVP01_0516600	PF3D7_0818700		OG0002496	PVP01_1005600	OG0000366	PF3D7_0103100	OG0001352	PVP01_0521100	PF3D7_0414600		OG0001353	PVP01_0521400	OG0002248	PF3D7_1368700
OG0004268	PVP01_1009700	OG0003873	PF3D7_1105600	OG0004817	PVP01_1133700	PF3D7_0615400		OG0001670	PVP01_0926100	OG0000227	PF3D7_0309200	OG0000420	PVP01_0516700	PF3D7_0818600		OG0004268	PVP01_1009700	OG0003297	PF3D7_0103200	OG0003595	PVP01_0521200	PF3D7_0414700		OG0003599	PVP01_0522500	OG0003987	PF3D7_1411200
OG0002469	PVP01_1011100	OG0001398	PF3D7_0706700	OG0000257	PVP01_0948400	PF3D7_1147800		OG0000468	PVP01_0926700	OG0000953	PF3D7_0309500	OG0001325	PVP01_0516800	PF3D7_0818500		OG0002469	PVP01_1011100	OG0000795	PF3D7_0103400	OG0001353	PVP01_0521400	PF3D7_0414900		OG0003602	PVP01_0526100	OG0003971	PF3D7_1417100
OG0004261	PVP01_1011700	OG0002646	PF3D7_1460800	OG0004178	PVP01_0810200	PF3D7_1010100		OG0001665	PVP01_0926900	OG0000954	PF3D7_0309600	OG0003585	PVP01_0517200	PF3D7_0818100		OG0002465	PVP01_1011600	OG0003296	PF3D7_0103500	OG0003599	PVP01_0522500	PF3D7_0416000		OG0003604	PVP01_0526400	OG0003967	PF3D7_1418200
OG0004259	PVP01_1011900	OG0001174	PF3D7_1209900	OG0004302	PVP01_1267500	PF3D7_1439500		OG0001662	PVP01_0927700	OG0000955	PF3D7_0309700	OG0001349	PVP01_0520500	PF3D7_0414000		OG0000319	PVP01_1013800	OG0003295	PF3D7_0103600	OG0003604	PVP01_0526400	PF3D7_0417000		OG0003605	PVP01_0526500	OG0003964	PF3D7_1419000
OG0000319	PVP01_1013800	OG0004211	PF3D7_0321300	OG0001562	PVP01_0733200	PF3D7_0934500		OG0001657	PVP01_0928700	OG0000956	PF3D7_0309800	OG0003594	PVP01_0520900	PF3D7_0414400		OG0002448	PVP01_1014800	OG0000794	PF3D7_0103700	OG0003605	PVP01_0526500	PF3D7_0417100		OG0001366	PVP01_0526600	OG0001921	PF3D7_1419100
OG0002448	PVP01_1014800	OG0003901	PF3D7_0407400	OG0002927	PVP01_1415300	PF3D7_1314400		OG0000466	PVP01_0929600	OG0003379	PF3D7_0309900	OG0001351	PVP01_0521000	PF3D7_0414500		OG0002443	PVP01_1015600	OG0000793	PF3D7_0103900	OG0001366	PVP01_0526600	PF3D7_0417200		OG0001367	PVP01_0526700	OG0001917	PF3D7_1420200
OG0002443	PVP01_1015600	OG0001210	PF3D7_0717900	OG0003811	PVP01_0931900	PF3D7_1131100		OG0001648	PVP01_0930500	OG0000958	PF3D7_0310300	OG0001352	PVP01_0521100	PF3D7_0414600		OG0002428	PVP01_1017600	OG0000792	PF3D7_0104400	OG0001367	PVP01_0526700	PF3D7_0417300		OG0003609	PVP01_0527700	OG0003959	PF3D7_1420500
OG0002428	PVP01_1017600	OG0002420	PF3D7_0615500	OG0003028	PVP01_1431600	PF3D7_1212700		OG0000298	PVP01_0937400	OG0000959	PF3D7_0310400	OG0003595	PVP01_0521200	PF3D7_0414700		OG0002082	PVP01_1018300	OG0000786	PF3D7_0105500	OG0003606	PVP01_0526800	PF3D7_0417400		OG0003610	PVP01_0527800	OG0001915	PF3D7_1420600
OG0002070	PVP01_1020600	OG0001470	PF3D7_0916200	OG0001568	PVP01_0948300	PF3D7_1147700		OG0005098	PVP01_0940300	OG0004913	PF3D7_0310500	OG0003599	PVP01_0522500	PF3D7_0416000		OG0002072	PVP01_1020400	OG0000785	PF3D7_0105600	OG0001371	PVP01_0527200	PF3D7_0417800		OG0000424	PVP01_0528300	OG0003958	PF3D7_1420700
OG0004051	PVP01_1021100	OG0004544	PF3D7_1310100	OG0003729	PVP01_0728700	PF3D7_0930200		OG0001595	PVP01_0942400	OG0000962	PF3D7_0311100	OG0003604	PVP01_0526400	PF3D7_0417000		OG0002070	PVP01_1020600	OG0003289	PF3D7_0105800	OG0003609	PVP01_0527700	PF3D7_0418300		OG0001381	PVP01_0529100	OG0001904	PF3D7_1422900
OG0002064	PVP01_1021700	OG0002194	PF3D7_1359100	OG0004944	PVP01_0933800	PF3D7_1133000		OG0001594	PVP01_0942500	OG0003384	PF3D7_0311200	OG0003605	PVP01_0526500	PF3D7_0417100		OG0002064	PVP01_1021700	OG0000784	PF3D7_0105900	OG0003610	PVP01_0527800	PF3D7_0418400		OG0000402	PVP01_0529400	OG0000491	PF3D7_1423000
OG0004047	PVP01_1022200	OG0001215	PF3D7_0718600	OG0000437	PVP01_0719100	PF3D7_0920700		OG0001580	PVP01_0945300	OG0000964	PF3D7_0311400	OG0001366	PVP01_0526600	PF3D7_0417200		OG0004047	PVP01_1022200	OG0000783	PF3D7_0106000	OG0003611	PVP01_0528200	PF3D7_0418800		OG0003479	PVP01_0530300	OG0001880	PF3D7_1429700
OG0002056	PVP01_1023500	OG0003349	PF3D7_0214700	OG0001081	PVP01_0615900	PF3D7_1030800		OG0001578	PVP01_0945600	OG0000967	PF3D7_0311800	OG0001367	PVP01_0526700	PF3D7_0417300		OG0004035	PVP01_1024700	OG0000782	PF3D7_0106100	OG0000424	PVP01_0528300	PF3D7_0418900		OG0001124	PVP01_0531000	OG0001868	PF3D7_1431300
OG0004040	PVP01_1024000	OG0001340	PF3D7_0816100	OG0003888	PVP01_0303800	PF3D7_0404500		OG0002512	PVP01_1002700	OG0000968	PF3D7_0312000	OG0003606	PVP01_0526800	PF3D7_0417400		OG0002049	PVP01_1025000	OG0000781	PF3D7_0106200	OG0000402	PVP01_0529400	PF3D7_0420000		OG0003482	PVP01_0531400	OG0001867	PF3D7_1431600
OG0004035	PVP01_1024700	OG0002703	PF3D7_1472100	OG0001268	PVP01_0506100	PF3D7_0828300		OG0002507	PVP01_1003300	OG0000972	PF3D7_0312400	OG0001371	PVP01_0527200	PF3D7_0417800		OG0000507	PVP01_1025600	OG0000780	PF3D7_0106300	OG0000403	PVP01_0529800	PF3D7_0420300		OG0003484	PVP01_0531800	OG0001863	PF3D7_1432600
OG0002049	PVP01_1025000	OG0004405	PF3D7_1471100	OG0001984	PVP01_1342500	PF3D7_1406200		OG0002497	PVP01_1005500	OG0000973	PF3D7_0312800	OG0003609	PVP01_0527700	PF3D7_0418300		OG0004033	PVP01_1026100	OG0000779	PF3D7_0106400	OG0003479	PVP01_0530300	PF3D7_0421800		OG0001130	PVP01_0532100	OG0001855	PF3D7_1433600
OG0004034	PVP01_1026000	OG0002401	PF3D7_0802600	OG0003711	PVP01_0723500	PF3D7_0925000		OG0002496	PVP01_1005600	OG0000974	PF3D7_0313200	OG0003610	PVP01_0527800	PF3D7_0418400		OG0002032	PVP01_1028200	OG0000778	PF3D7_0106700	OG0001124	PVP01_0531000	PF3D7_0422500		OG0004773	PVP01_0532200	OG0003921	PF3D7_1433700
OG0004033	PVP01_1026100	OG0001031	PF3D7_1020900	OG0000580	PVP01_1230900	PF3D7_1323700		OG0004268	PVP01_1009700	OG0000975	PF3D7_0313300	OG0003611	PVP01_0528200	PF3D7_0418800		OG0002028	PVP01_1028700	OG0003287	PF3D7_0106900	OG0003482	PVP01_0531400	PF3D7_0422900		OG0004964	PVP01_0602100	OG0001853	PF3D7_1434000
OG0005523	PVP01_1030700	OG0001708	PF3D7_1120600	OG0003604	PVP01_0526400	PF3D7_0417000		OG0002474	PVP01_1010000	OG0003388	PF3D7_0313400	OG0000424	PVP01_0528300	PF3D7_0418900		OG0000504	PVP01_1029900	OG0000776	PF3D7_0107100	OG0003483	PVP01_0531500	PF3D7_0423000		OG0001011	PVP01_0602200	OG0004323	PF3D7_1444500
OG0002250	PVP01_1103100	OG0002558	PF3D7_1445700	OG0002742	PVP01_1226900	PF3D7_1327500		OG0002469	PVP01_1011100	OG0003390	PF3D7_0313600	OG0000402	PVP01_0529400	PF3D7_0420000		OG0004018	PVP01_1032600	OG0000775	PF3D7_0107200	OG0003484	PVP01_0531800	PF3D7_0423300		OG0001012	PVP01_0602400	OG0004992	PF3D7_1448500
OG0002247	PVP01_1103500	OG0004127	PF3D7_1360500	OG0001767	PVP01_0911100	PF3D7_1110300		OG0002465	PVP01_1011600	OG0000976	PF3D7_0313700	OG0000403	PVP01_0529800	PF3D7_0420300		OG0002250	PVP01_1103100	OG0003286	PF3D7_0107700	OG0001130	PVP01_0532100	PF3D7_0423600		OG0003414	PVP01_0602700	OG0002575	PF3D7_1448600
OG0002237	PVP01_1105100	OG0001350	PF3D7_0414300	OG0003135	PVP01_1451900	PF3D7_1233800		OG0000319	PVP01_1013800	OG0003391	PF3D7_0313800	OG0003479	PVP01_0530300	PF3D7_0421800		OG0002247	PVP01_1103500	OG0000773	PF3D7_0107800	OG0004964	PVP01_0602100	PF3D7_1016900		OG0005317	PVP01_0602900	OG0002593	PF3D7_1451100
OG0002234	PVP01_1105500	OG0000686	PF3D7_0603800	OG0004218	PVP01_0109500	PF3D7_0709200		OG0002448	PVP01_1014800	OG0003392	PF3D7_0313900	OG0001124	PVP01_0531000	PF3D7_0422500		OG0002234	PVP01_1105500	OG0003285	PF3D7_0107900	OG0001011	PVP01_0602200	PF3D7_1017000		OG0001018	PVP01_0603800	OG0004338	PF3D7_1451200
OG0002204	PVP01_1110300	OG0004083	PF3D7_0622100	OG0001096	PVP01_0618800	PF3D7_1033700		OG0002443	PVP01_1015600	OG0000384	PF3D7_0314100	OG0003482	PVP01_0531400	PF3D7_0422900		OG0002204	PVP01_1110300	OG0000362	PF3D7_0108400	OG0003414	PVP01_0602700	PF3D7_1017500		OG0001037	PVP01_0607600	OG0004354	PF3D7_1456000
OG0002175	PVP01_1116200	OG0003188	PF3D7_1244200	OG0002120	PVP01_1126400	PF3D7_0623100		OG0002428	PVP01_1017600	OG0000195	PF3D7_0314700	OG0003483	PVP01_0531500	PF3D7_0423000		OG0002195	PVP01_1112700	OG0000769	PF3D7_0108600	OG0001018	PVP01_0603800	PF3D7_1018600		OG0001038	PVP01_0607700	OG0004408	PF3D7_1472400
OG0002172	PVP01_1116800	OG0003307	PF3D7_0728500	OG0003866	PVP01_0907900	PF3D7_1107100		OG0002082	PVP01_1018300	OG0003396	PF3D7_0315000	OG0003484	PVP01_0531800	PF3D7_0423300		OG0002172	PVP01_1116800	OG0003283	PF3D7_0108700	OG0003419	PVP01_0603900	PF3D7_1018700		OG0001039	PVP01_0607800	OG0002711	PF3D7_1473700
OG0002165	PVP01_1118100	OG0002346	PF3D7_0320900	OG0002802	PVP01_1213400	PF3D7_1341300		OG0002072	PVP01_1020400	OG0000385	PF3D7_0315100	OG0001130	PVP01_0532100	PF3D7_0423600		OG0002165	PVP01_1118100	OG0000361	PF3D7_0109100	OG0003430	PVP01_0607000	PF3D7_1021800		OG0003433	PVP01_0607900
OG0004105	PVP01_1119900	OG0004566	PF3D7_1319200	OG0001419	PVP01_0823200	PF3D7_0316900		OG0002070	PVP01_1020600	OG0000228	PF3D7_0315200	OG0004964	PVP01_0602100	PF3D7_1016900		OG0004105	PVP01_1119900	OG0004731	PF3D7_0109300	OG0001038	PVP01_0607700	PF3D7_1022500		OG0001045	PVP01_0609100
OG0002152	PVP01_1120300	OG0004997	PF3D7_1201300	OG0000627	PVP01_1439300	PF3D7_1221000		OG0004051	PVP01_1021100	OG0003398	PF3D7_0315700	OG0001011	PVP01_0602200	PF3D7_1017000		OG0004100	PVP01_1121600	OG0000764	PF3D7_0109500	OG0001039	PVP01_0607800	PF3D7_1022600		OG0001046	PVP01_0609400
OG0002125	PVP01_1125500	OG0003772	PF3D7_1141400	OG0003313	PVP01_0421700	PF3D7_0203400		OG0002064	PVP01_1021700	OG0003399	PF3D7_0315800	OG0003414	PVP01_0602700	PF3D7_1017500		OG0002139	PVP01_1122700	OG0000763	PF3D7_0109600	OG0001045	PVP01_0609100	PF3D7_1023900		OG0004770	PVP01_0611700
OG0002122	PVP01_1125900	OG0002375	PF3D7_0807900	OG0003000	PVP01_1427000	PF3D7_0813300		OG0004047	PVP01_1022200	OG0003400	PF3D7_0315900	OG0001018	PVP01_0603800	PF3D7_1018600		OG0004088	PVP01_1124800	OG0000759	PF3D7_0110100	OG0003439	PVP01_0609300	PF3D7_1024100		OG0003450	PVP01_0612400
OG0004077	PVP01_1129100	OG0003889	PF3D7_0404600	OG0002390	PVP01_0115600	PF3D7_0804900		OG0004035	PVP01_1024700	OG0000983	PF3D7_0316000	OG0003419	PVP01_0603900	PF3D7_1018700		OG0002125	PVP01_1125500	OG0000360	PF3D7_0110200	OG0001046	PVP01_0609400	PF3D7_1024200		OG0001064	PVP01_0612900
OG0004075	PVP01_1129300	OG0001027	PF3D7_1020400	OG0000765	PVP01_0205700	PF3D7_0109400		OG0002049	PVP01_1025000	OG0000984	PF3D7_0316100	OG0003430	PVP01_0607000	PF3D7_1021800		OG0004077	PVP01_1129100	OG0000754	PF3D7_0110900	OG0003446	PVP01_0611200	PF3D7_1026000		OG0003452	PVP01_0613600
OG0004069	PVP01_1130400	OG0003300	PF3D7_0726400	OG0004679	PVP01_1456000	PF3D7_1237900		OG0000507	PVP01_1025600	OG0003401	PF3D7_0316200	OG0001038	PVP01_0607700	PF3D7_1022500		OG0004075	PVP01_1129300	OG0000358	PF3D7_0111000	OG0004770	PVP01_0611700	PF3D7_1026500		OG0005078	PVP01_0614100
OG0000514	PVP01_1130500	OG0001522	PF3D7_0926100	OG0002591	PVP01_1256300	PF3D7_1450700		OG0004033	PVP01_1026100	OG0000985	PF3D7_0316400	OG0001039	PVP01_0607800	PF3D7_1022600		OG0000514	PVP01_1130500	OG0000753	PF3D7_0111200	OG0003450	PVP01_0612400	PF3D7_1027300		OG0001072	PVP01_0614500
OG0005341	PVP01_1137400	OG0000414	PF3D7_0828900	OG0002360	PVP01_0109300	PF3D7_0709000		OG0002032	PVP01_1028200	OG0000986	PF3D7_0316500	OG0001045	PVP01_0609100	PF3D7_1023900		OG0002098	PVP01_1131000	OG0000752	PF3D7_0111300	OG0001064	PVP01_0612900	PF3D7_1027800		OG0003457	PVP01_0614800
OG0000734	PVP01_1137800	OG0002491	PF3D7_0527200	OG0003595	PVP01_0521200	PF3D7_0414700		OG0002028	PVP01_1028700	OG0000987	PF3D7_0316700	OG0003439	PVP01_0609300	PF3D7_1024100		OG0004061	PVP01_1133000	OG0000751	PF3D7_0111400	OG0003452	PVP01_0613600	PF3D7_1028500		OG0001084	PVP01_0616700
OG0000729	PVP01_1138300	OG0002193	PF3D7_1359000	OG0001925	PVP01_1331200	PF3D7_1417700		OG0000504	PVP01_1029900	OG0003650	PF3D7_0317300	OG0001046	PVP01_0609400	PF3D7_1024200		OG0005341	PVP01_1137400	OG0005103	PF3D7_0112800	OG0004771	PVP01_0613700	PF3D7_1028600		OG0001085	PVP01_0616800
OG0000280	PVP01_1139800	OG0003726	PF3D7_0929400	OG0004482	PVP01_1211700	PF3D7_1343100		OG0004022	PVP01_1030300	OG0003649	PF3D7_0317500	OG0003446	PVP01_0611200	PF3D7_1026000		OG0000280	PVP01_1139800	OG0004958	PF3D7_0202400	OG0001072	PVP01_0614500	PF3D7_1029400		OG0003464	PVP01_0617300
OG0000712	PVP01_1141400	OG0001258	PF3D7_0725300	OG0000645	PVP01_1460700	PF3D7_1243600		OG0005523	PVP01_1030700	OG0001415	PF3D7_0317800	OG0004770	PVP01_0611700	PF3D7_1026500		OG0003265	PVP01_1140500	OG0004901	PF3D7_0202900	OG0003457	PVP01_0614800	PF3D7_1029700		OG0001090	PVP01_0617600
OG0000708	PVP01_1141800	OG0001221	PF3D7_0719600	OG0001351	PVP01_0521000	PF3D7_0414500		OG0004018	PVP01_1032600	OG0003648	PF3D7_0318000	OG0003450	PVP01_0612400	PF3D7_1027300		OG0000708	PVP01_1141800	OG0000829	PF3D7_0203700	OG0001076	PVP01_0615300	PF3D7_1030200		OG0003465	PVP01_0617700
OG0000702	PVP01_1142400	OG0001356	PF3D7_0415300	OG0001488	PVP01_0718000	PF3D7_0919600		OG0002250	PVP01_1103100	OG0000428	PF3D7_0318200	OG0001064	PVP01_0612900	PF3D7_1027800		OG0000702	PVP01_1142400	OG0003315	PF3D7_0204000	OG0001077	PVP01_0615400	PF3D7_1030300		OG0004772	PVP01_0618300
OG0003257	PVP01_1142900	OG0001334	PF3D7_0817100	OG0001301	PVP01_0511300	PF3D7_0823000		OG0002247	PVP01_1103500	OG0003647	PF3D7_0318300	OG0003452	PVP01_0613600	PF3D7_1028500		OG0003253	PVP01_1143800	OG0000833	PF3D7_0204200	OG0001084	PVP01_0616700	PF3D7_1031600		OG0001094	PVP01_0618400
OG0000676	PVP01_1146700	OG0000445	PF3D7_0929200	OG0001946	PVP01_1334800	PF3D7_1414100		OG0002234	PVP01_1105500	OG0001412	PF3D7_0318600	OG0004771	PVP01_0613700	PF3D7_1028600		OG0000684	PVP01_1145300	OG0000837	PF3D7_0204900	OG0001085	PVP01_0616800	PF3D7_1031700		OG0001096	PVP01_0618800
OG0004517	PVP01_1202400	OG0001555	PF3D7_0932800	OG0001352	PVP01_0521100	PF3D7_0414600		OG0002223	PVP01_1107200	OG0000427	PF3D7_0319000	OG0001072	PVP01_0614500	PF3D7_1029400		OG0003247	PVP01_1146200	OG0000838	PF3D7_0205200	OG0003465	PVP01_0617700	PF3D7_1032600		OG0001098	PVP01_0619000
OG0002853	PVP01_1203000	OG0002702	PF3D7_1472000	OG0000258	PVP01_0939500	PF3D7_1138500		OG0002204	PVP01_1110300	OG0001410	PF3D7_0319100	OG0003457	PVP01_0614800	PF3D7_1029700		OG0000677	PVP01_1146300	OG0003319	PF3D7_0205300	OG0003467	PVP01_0618200	PF3D7_1033100		OG0001106	PVP01_0619900
OG0004504	PVP01_1205900	OG0004322	PF3D7_1444400	OG0004260	PVP01_1011800	PF3D7_0522100		OG0002202	PVP01_1111000	OG0001409	PF3D7_0319200	OG0001076	PVP01_0615300	PF3D7_1030200		OG0000676	PVP01_1146700	OG0000839	PF3D7_0205400	OG0004772	PVP01_0618300	PF3D7_1033200		OG0000399	PVP01_0620000
OG0004498	PVP01_1207300	OG0000609	PF3D7_1306800	OG0003562	PVP01_0509300	PF3D7_0825000		OG0002195	PVP01_1112700	OG0004216	PF3D7_0319700	OG0001077	PVP01_0615400	PF3D7_1030300		OG0002853	PVP01_1203000	OG0003320	PF3D7_0205600	OG0001096	PVP01_0618800	PF3D7_1033700		OG0001111	PVP01_0621300
OG0004493	PVP01_1208500	OG0002481	PF3D7_0525300	OG0003669	PVP01_0710500	PF3D7_0912000		OG0002172	PVP01_1116800	OG0004215	PF3D7_0319800	OG0001084	PVP01_0616700	PF3D7_1031600		OG0004504	PVP01_1205900	OG0000843	PF3D7_0206000	OG0001098	PVP01_0619000	PF3D7_1033900		OG0001010	PVP01_0701400
OG0002812	PVP01_1211400	OG0004245	PF3D7_0802700	OG0002203	PVP01_1110900	PF3D7_1361100		OG0002165	PVP01_1118100	OG0004214	PF3D7_0320400	OG0001085	PVP01_0616800	PF3D7_1031700		OG0004493	PVP01_1208500	OG0000844	PF3D7_0206100	OG0001106	PVP01_0619900	PF3D7_1034800		OG0001008	PVP01_0701600
OG0004483	PVP01_1211500	OG0003392	PF3D7_0313900	OG0003810	PVP01_0932000	PF3D7_1131200		OG0004105	PVP01_1119900	OG0002349	PF3D7_0320600	OG0003465	PVP01_0617700	PF3D7_1032600		OG0002826	PVP01_1208800	OG0004899	PF3D7_0206900	OG0001111	PVP01_0621300	PF3D7_1036900		OG0001007	PVP01_0701700
OG0004986	PVP01_1211800	OG0003027	PF3D7_1212500	OG0002807	PVP01_1212800	PF3D7_1342000		OG0004100	PVP01_1121600	OG0002348	PF3D7_0320700	OG0003467	PVP01_0618200	PF3D7_1033100		OG0002812	PVP01_1211400	OG0003325	PF3D7_0208300	OG0001010	PVP01_0701400	PF3D7_0903000		OG0003412	PVP01_0701900
OG0002799	PVP01_1214000	OG0001960	PF3D7_1411000	OG0002663	PVP01_1242100	PF3D7_1464700		OG0002139	PVP01_1122700	OG0002347	PF3D7_0320800	OG0004772	PVP01_0618300	PF3D7_1033200		OG0004986	PVP01_1211800	OG0000852	PF3D7_0208700	OG0001007	PVP01_0701700	PF3D7_0903300		OG0003406	PVP01_0704200
OG0004471	PVP01_1215100	OG0004221	PF3D7_0709800	OG0001815	PVP01_0305400	PF3D7_0406000		OG0002125	PVP01_1125500	OG0004213	PF3D7_0321000	OG0000398	PVP01_0618700	PF3D7_1033600		OG0002799	PVP01_1214000	OG0003329	PF3D7_0209000	OG0003412	PVP01_0701900	PF3D7_0903500		OG0003402	PVP01_0705100
OG0004470	PVP01_1215200	OG0003215	PF3D7_1249500	OG0002539	PVP01_1265400	PF3D7_1441600		OG0002122	PVP01_1125900	OG0004211	PF3D7_0321300	OG0001096	PVP01_0618800	PF3D7_1033700		OG0004470	PVP01_1215200	OG0000855	PF3D7_0209300	OG0003408	PVP01_0703500	PF3D7_0905100		OG0003653	PVP01_0705500
OG0004467	PVP01_1216200	OG0003648	PF3D7_0318000	OG0001274	PVP01_0507400	PF3D7_0827000		OG0004077	PVP01_1129100	OG0004207	PF3D7_0322200	OG0001098	PVP01_0619000	PF3D7_1033900		OG0000594	PVP01_1217800	OG0000856	PF3D7_0209400	OG0003406	PVP01_0704200	PF3D7_0905800		OG0000429	PVP01_0705900
OG0000594	PVP01_1217800	OG0002535	PF3D7_1440400	OG0004001	PVP01_1342900	PF3D7_1405900		OG0004075	PVP01_1129300	OG0002339	PF3D7_0322300	OG0001106	PVP01_0619900	PF3D7_1034800		OG0000593	PVP01_1217900	OG0003330	PF3D7_0209500	OG0003402	PVP01_0705100	PF3D7_0906600		OG0001424	PVP01_0706300
OG0000593	PVP01_1217900	OG0002034	PF3D7_0506200	OG0001017	PVP01_0603700	PF3D7_1018500		OG0004069	PVP01_1130400	OG0004206	PF3D7_0322400	OG0001111	PVP01_0621300	PF3D7_1036900		OG0005569	PVP01_1218000	OG0000857	PF3D7_0209600	OG0000429	PVP01_0705900	PF3D7_0907400		OG0001426	PVP01_0706500
OG0005569	PVP01_1218000	OG0003931	PF3D7_1429600	OG0003276	PVP01_1136000	PF3D7_0613100		OG0000514	PVP01_1130500	OG0004205	PF3D7_0322500	OG0001010	PVP01_0701400	PF3D7_0903000		OG0002775	PVP01_1218500	OG0000373	PF3D7_0210100	OG0001424	PVP01_0706300	PF3D7_0907800		OG0003660	PVP01_0707800
OG0002775	PVP01_1218500	OG0004669	PF3D7_1235200	OG0001755	PVP01_0912800	PF3D7_1112000		OG0002098	PVP01_1131000	OG0004202	PF3D7_0322800	OG0001007	PVP01_0701700	PF3D7_0903300		OG0002771	PVP01_1221400	OG0000374	PF3D7_0210600	OG0000432	PVP01_0707900	PF3D7_0909400		OG0003661	PVP01_0708100
OG0002751	PVP01_1225100	OG0001053	PF3D7_1025300	OG0000318	PVP01_1014900	PF3D7_0519000		OG0005341	PVP01_1137400	OG0002338	PF3D7_0322900	OG0003412	PVP01_0701900	PF3D7_0903500		OG0002747	PVP01_1225700	OG0000866	PF3D7_0211800	OG0003661	PVP01_0708100	PF3D7_0909600		OG0003662	PVP01_0708700
OG0002747	PVP01_1225700	OG0004251	PF3D7_0516600	OG0003766	PVP01_0943600	PF3D7_1142900		OG0003269	PVP01_1137600	OG0004201	PF3D7_0323200	OG0003408	PVP01_0703500	PF3D7_0905100		OG0004438	PVP01_1226200	OG0000868	PF3D7_0212000	OG0003662	PVP01_0708700	PF3D7_0910200		OG0001437	PVP01_0708800
OG0004439	PVP01_1226000	OG0002267	PF3D7_1004700	OG0004212	PVP01_0819100	PF3D7_0321100		OG0000734	PVP01_1137800	OG0004199	PF3D7_0323400	OG0003402	PVP01_0705100	PF3D7_0906600		OG0000585	PVP01_1226400	OG0003337	PF3D7_0212100	OG0001437	PVP01_0708800	PF3D7_0910300		OG0003668	PVP01_0710400
OG0000585	PVP01_1226400	OG0001675	PF3D7_1124800	OG0002388	PVP01_0115300	PF3D7_0805200		OG0000280	PVP01_1139800	OG0002336	PF3D7_0323500	OG0001421	PVP01_0705700	PF3D7_0907200		OG0005114	PVP01_1228600	OG0003338	PF3D7_0212400	OG0003668	PVP01_0710400	PF3D7_0911900		OG0003669	PVP01_0710500
OG0005114	PVP01_1228600	OG0002108	PF3D7_0621400	OG0004712	PVP01_1468200	PF3D7_1251100		OG0003265	PVP01_1140500	OG0004198	PF3D7_0323800	OG0000429	PVP01_0705900	PF3D7_0907400		OG0002714	PVP01_1232800	OG0003339	PF3D7_0212500	OG0003669	PVP01_0710500	PF3D7_0912000		OG0001450	PVP01_0710900
OG0002731	PVP01_1230400	OG0004794	PF3D7_0405300	OG0001805	PVP01_0302700	PF3D7_0403500		OG0003262	PVP01_1140800	OG0001804	PF3D7_0403100	OG0001424	PVP01_0706300	PF3D7_0907800		OG0002708	PVP01_1233700	OG0003340	PF3D7_0212700	OG0001450	PVP01_0710900	PF3D7_0912500		OG0004783	PVP01_0712200
OG0002727	PVP01_1231100	OG0000955	PF3D7_0309700	OG0001483	PVP01_0717300	PF3D7_0918900		OG0000712	PVP01_1141400	OG0003879	PF3D7_0403200	OG0000432	PVP01_0707900	PF3D7_0909400		OG0002705	PVP01_1234500	OG0004884	PF3D7_0212800	OG0004783	PVP01_0712200	PF3D7_0913800		OG0003675	PVP01_0712500
OG0002716	PVP01_1232600	OG0003935	PF3D7_1428200	OG0000641	PVP01_1454700	PF3D7_1236600		OG0000708	PVP01_1141800	OG0001806	PF3D7_0403700	OG0003661	PVP01_0708100	PF3D7_0909600		OG0004392	PVP01_1239900	OG0003341	PF3D7_0213000	OG0003675	PVP01_0712500	PF3D7_0914100		OG0003676	PVP01_0712900
OG0002715	PVP01_1232700	OG0001939	PF3D7_1415000	OG0003818	PVP01_0928600	PF3D7_1127900		OG0000702	PVP01_1142400	OG0003886	PF3D7_0404300	OG0003662	PVP01_0708700	PF3D7_0910200		OG0002670	PVP01_1240700	OG0000873	PF3D7_0213200	OG0001463	PVP01_0713000	PF3D7_0914600		OG0001463	PVP01_0713000
OG0002714	PVP01_1232800	OG0001521	PF3D7_0925800	OG0001424	PVP01_0706300	PF3D7_0907800		OG0000684	PVP01_1145300	OG0003889	PF3D7_0404600	OG0001437	PVP01_0708800	PF3D7_0910300		OG0004382	PVP01_1242500	OG0000874	PF3D7_0213400	OG0001469	PVP01_0714400	PF3D7_0916000		OG0003677	PVP01_0713300
OG0002709	PVP01_1233600	OG0003455	PF3D7_1029200	OG0002856	PVP01_1202300	PF3D7_1352500		OG0003247	PVP01_1146200	OG0001808	PF3D7_0404700	OG0001439	PVP01_0709100	PF3D7_0910600		OG0000573	PVP01_1245400	OG0003343	PF3D7_0213500	OG0003683	PVP01_0714700	PF3D7_0916300		OG0000433	PVP01_0713400
OG0002708	PVP01_1233700	OG0001021	PF3D7_1019600	OG0004855	PVP01_0415100	PF3D7_0209700		OG0000677	PVP01_1146300	OG0003891	PF3D7_0404900	OG0003668	PVP01_0710400	PF3D7_0911900		OG0002639	PVP01_1246800	OG0003345	PF3D7_0213800	OG0001473	PVP01_0715100	PF3D7_0916700		OG0001469	PVP01_0714400
OG0004401	PVP01_1236500	OG0003649	PF3D7_0317500	OG0002515	PVP01_1270500	PF3D7_1475600		OG0000676	PVP01_1146700	OG0003893	PF3D7_0405200	OG0003669	PVP01_0710500	PF3D7_0912000		OG0004369	PVP01_1247400	OG0003346	PF3D7_0213900	OG0000435	PVP01_0716500	PF3D7_0918100		OG0003682	PVP01_0714500
OG0004400	PVP01_1236600	OG0001151	PF3D7_1205600	OG0004190	PVP01_0813900	PF3D7_1013800		OG0002853	PVP01_1203000	OG0001810	PF3D7_0405400	OG0001450	PVP01_0710900	PF3D7_0912500		OG0002634	PVP01_1247500	OG0000877	PF3D7_0214100	OG0003690	PVP01_0717100	PF3D7_0918700		OG0003683	PVP01_0714700
OG0004392	PVP01_1239900	OG0000873	PF3D7_0213200	OG0002446	PVP01_1015300	PF3D7_0518600		OG0002850	PVP01_1203700	OG0001811	PF3D7_0405600	OG0004783	PVP01_0712200	PF3D7_0913800		OG0002632	PVP01_1247900	OG0000879	PF3D7_0214400	OG0001483	PVP01_0717300	PF3D7_0918900		OG0001472	PVP01_0715000
OG0002671	PVP01_1240500	OG0002488	PF3D7_0526900	OG0002100	PVP01_1129800	PF3D7_0619700		OG0004496	PVP01_1207900	OG0001814	PF3D7_0405900	OG0003675	PVP01_0712500	PF3D7_0914100		OG0004368	PVP01_1248300	OG0003347	PF3D7_0214500	OG0001484	PVP01_0717400	PF3D7_0919000		OG0001473	PVP01_0715100
OG0002670	PVP01_1240700	OG0002822	PF3D7_1344600	OG0004537	PVP01_1409400	PF3D7_1308400		OG0004493	PVP01_1208500	OG0004953	PF3D7_0406200	OG0003676	PVP01_0712900	PF3D7_0914500		OG0004367	PVP01_1248400	OG0000880	PF3D7_0214800	OG0003691	PVP01_0717800	PF3D7_0919400		OG0000435	PVP01_0716500
OG0000573	PVP01_1245400	OG0004227	PF3D7_0711300	OG0003278	PVP01_1135200	PF3D7_0613900		OG0002826	PVP01_1208800	OG0001817	PF3D7_0406400	OG0001463	PVP01_0713000	PF3D7_0914600		OG0004364	PVP01_1249000	OG0000882	PF3D7_0215200	OG0001488	PVP01_0718000	PF3D7_0919600		OG0003690	PVP01_0717100
OG0002650	PVP01_1245500	OG0000404	PF3D7_1202500	OG0001750	PVP01_0913900	PF3D7_1113100		OG0002812	PVP01_1211400	OG0003895	PF3D7_0406500	OG0001464	PVP01_0713100	PF3D7_0914700		OG0002624	PVP01_1249700	OG0000884	PF3D7_0215500	OG0001490	PVP01_0718200	PF3D7_0919800		OG0001483	PVP01_0717300
OG0002639	PVP01_1246800	OG0002851	PF3D7_1351400	OG0003479	PVP01_0530300	PF3D7_0421800		OG0004986	PVP01_1211800	OG0003897	PF3D7_0406700	OG0003677	PVP01_0713300	PF3D7_0914900		OG0002614	PVP01_1251500	OG0000885	PF3D7_0215700	OG0000437	PVP01_0719100	PF3D7_0920700		OG0001484	PVP01_0717400
OG0004369	PVP01_1247400	OG0002695	PF3D7_1470400	OG0002557	PVP01_1261400	PF3D7_1445600		OG0002799	PVP01_1214000	OG0001818	PF3D7_0406800	OG0001469	PVP01_0714400	PF3D7_0916000		OG0002611	PVP01_1252500	OG0000252	PF3D7_0216000	OG0003704	PVP01_0720600	PF3D7_0922100		OG0001485	PVP01_0717500
OG0002634	PVP01_1247500	OG0003642	PF3D7_0708200	OG0001090	PVP01_0617600	PF3D7_1032500		OG0004470	PVP01_1215200	OG0003898	PF3D7_0406900	OG0003683	PVP01_0714700	PF3D7_0916300		OG0004347	PVP01_1253100	OG0003352	PF3D7_0216100	OG0001499	PVP01_0720700	PF3D7_0922200		OG0003691	PVP01_0717800
OG0004368	PVP01_1248300	OG0002413	PF3D7_0614500	OG0001627	PVP01_0934800	PF3D7_1134000		OG0000594	PVP01_1217800	OG0003901	PF3D7_0407400	OG0003684	PVP01_0714800	PF3D7_0916400		OG0005570	PVP01_1257800	OG0003353	PF3D7_0216200	OG0001504	PVP01_0721200	PF3D7_0922700		OG0003692	PVP01_0717900
OG0004364	PVP01_1249000	OG0002902	PF3D7_1310800	OG0003905	PVP01_0307400	PF3D7_0408100		OG0005569	PVP01_1218000	OG0001821	PF3D7_0407500	OG0001473	PVP01_0715100	PF3D7_0916700		OG0000563	PVP01_1260400	OG0003354	PF3D7_0216300	OG0001512	PVP01_0722500	PF3D7_0924000		OG0001488	PVP01_0718000
OG0002624	PVP01_1249700	OG0001754	PF3D7_1112200	OG0001952	PVP01_1335700	PF3D7_1413200		OG0002776	PVP01_1218400	OG0003902	PF3D7_0407600	OG0000435	PVP01_0716500	PF3D7_0918100		OG0000323	PVP01_1260800	OG0000887	PF3D7_0216400	OG0003711	PVP01_0723500	PF3D7_0925000		OG0001490	PVP01_0718200
OG0002614	PVP01_1251500	OG0000893	PF3D7_0217700	OG0004715	PVP01_1468900	PF3D7_1251800		OG0002775	PVP01_1218500	OG0001822	PF3D7_0407700	OG0003690	PVP01_0717100	PF3D7_0918700		OG0002556	PVP01_1261500	OG0003355	PF3D7_0216500	OG0003712	PVP01_0723600	PF3D7_0925100		OG0000437	PVP01_0719100
OG0002611	PVP01_1252500	OG0002130	PF3D7_0624500	OG0003822	PVP01_0927900	PF3D7_1127200		OG0002771	PVP01_1221400	OG0003903	PF3D7_0407800	OG0001483	PVP01_0717300	PF3D7_0918900		OG0000321	PVP01_1262700	OG0000888	PF3D7_0216600	OG0001518	PVP01_0723700	PF3D7_0925200		OG0000438	PVP01_0719400
OG0004347	PVP01_1253100	OG0003226	PF3D7_1251300	OG0000629	PVP01_1441300	PF3D7_1223100		OG0002747	PVP01_1225700	OG0001823	PF3D7_0407900	OG0001484	PVP01_0717400	PF3D7_0919000		OG0004314	PVP01_1264900	OG0003357	PF3D7_0217000	OG0000441	PVP01_0723900	PF3D7_0925400		OG0001498	PVP01_0720500
OG0002598	PVP01_1255300	OG0001152	PF3D7_1205900	OG0004918	PVP01_1232500	PF3D7_1322100		OG0004438	PVP01_1226200	OG0003906	PF3D7_0408200	OG0003691	PVP01_0717800	PF3D7_0919400		OG0002542	PVP01_1265000	OG0000890	PF3D7_0217100	OG0001523	PVP01_0724700	PF3D7_0926200		OG0001499	PVP01_0720700
OG0005570	PVP01_1257800	OG0004236	PF3D7_0806000	OG0001158	PVP01_1306200	PF3D7_1207100		OG0000585	PVP01_1226400	OG0001825	PF3D7_0408400	OG0003692	PVP01_0717900	PF3D7_0919500		OG0002541	PVP01_1265100	OG0000894	PF3D7_0217800	OG0003729	PVP01_0728700	PF3D7_0930200		OG0001504	PVP01_0721200
OG0002579	PVP01_1257900	OG0004559	PF3D7_1316200	OG0003457	PVP01_0614800	PF3D7_1029700		OG0005114	PVP01_1228600	OG0001827	PF3D7_0409000	OG0001488	PVP01_0718000	PF3D7_0919600		OG0002526	PVP01_1268100	OG0000897	PF3D7_0218100	OG0003732	PVP01_0729400	PF3D7_0930800		OG0001509	PVP01_0722100
OG0004329	PVP01_1259900	OG0004002	PF3D7_1405700	OG0001706	PVP01_0921700	PF3D7_1121100		OG0002715	PVP01_1232700	OG0001829	PF3D7_0409300	OG0001490	PVP01_0718200	PF3D7_0919800		OG0002520	PVP01_1269500	OG0000899	PF3D7_0218400	OG0001547	PVP01_0729600	PF3D7_0930900		OG0001514	PVP01_0722800
OG0000563	PVP01_1260400	OG0001572	PF3D7_1146500	OG0002718	PVP01_1232300	PF3D7_1322300		OG0002714	PVP01_1232800	OG0001831	PF3D7_0409500	OG0000437	PVP01_0719100	PF3D7_0920700		OG0002518	PVP01_1269800	OG0000901	PF3D7_0218600	OG0003734	PVP01_0729800	PF3D7_0931100		OG0003711	PVP01_0723500
OG0000323	PVP01_1260800	OG0000306	PF3D7_0508500	OG0003683	PVP01_0714700	PF3D7_0916300		OG0002708	PVP01_1233700	OG0001832	PF3D7_0409600	OG0003704	PVP01_0720600	PF3D7_0922100		OG0004861	PVP01_1301400	OG0003363	PF3D7_0219500	OG0000448	PVP01_0730800	PF3D7_0932100		OG0000441	PVP01_0723900
OG0002556	PVP01_1261500	OG0002074	PF3D7_0513800	OG0000367	PVP01_0212900	PF3D7_0727200		OG0002705	PVP01_1234500	OG0001833	PF3D7_0409700	OG0001499	PVP01_0720700	PF3D7_0922200		OG0003495	PVP01_1303400	OG0004780	PF3D7_0301800	OG0001551	PVP01_0730900	PF3D7_0932200		OG0003715	PVP01_0724400
OG0000321	PVP01_1262700	OG0003444	PF3D7_1025400	OG0003292	PVP01_0210500	PF3D7_0104200		OG0004392	PVP01_1239900	OG0004795	PF3D7_0410000	OG0001504	PVP01_0721200	PF3D7_0922700		OG0003505	PVP01_1306400	OG0003365	PF3D7_0302600	OG0001562	PVP01_0733200	PF3D7_0934500		OG0001523	PVP01_0724700
OG0002551	PVP01_1263200	OG0004106	PF3D7_0629900	OG0002935	PVP01_1416300	PF3D7_1315400		OG0002671	PVP01_1240500	OG0001835	PF3D7_0410300	OG0001509	PVP01_0722100	PF3D7_0923600		OG0004999	PVP01_1308200	OG0000912	PF3D7_0303000	OG0003746	PVP01_0733300	PF3D7_0934600		OG0001534	PVP01_0726300
OG0004314	PVP01_1264900	OG0002262	PF3D7_1003700	OG0001807	PVP01_0303200	PF3D7_0403900		OG0002670	PVP01_1240700	OG0003910	PF3D7_0410500	OG0001512	PVP01_0722500	PF3D7_0924000		OG0001171	PVP01_1308600	OG0000914	PF3D7_0303200	OG0001563	PVP01_0733400	PF3D7_0934700		OG0003721	PVP01_0726600
OG0002542	PVP01_1265000	OG0004226	PF3D7_0711200	OG0001206	PVP01_0313100	PF3D7_0717300		OG0004382	PVP01_1242500	OG0001837	PF3D7_0410600	OG0003712	PVP01_0723600	PF3D7_0925100		OG0001178	PVP01_1310000	OG0000917	PF3D7_0303500	OG0002265	PVP01_0804000	PF3D7_1004300		OG0004889	PVP01_0726650
OG0004313	PVP01_1265200	OG0004450	PF3D7_1331100	OG0004732	PVP01_1210700	PF3D7_1344100		OG0004381	PVP01_1242600	OG0001838	PF3D7_0410700	OG0001518	PVP01_0723700	PF3D7_0925200		OG0003521	PVP01_1312000	OG0000919	PF3D7_0303700	OG0002280	PVP01_0806600	PF3D7_1006900		OG0000444	PVP01_0727500
OG0004312	PVP01_1265500	OG0004202	PF3D7_0322800	OG0002061	PVP01_1022000	PF3D7_0512000		OG0002651	PVP01_1245300	OG0001193	PF3D7_0410900	OG0000441	PVP01_0723900	PF3D7_0925400		OG0000291	PVP01_1312600	OG0000922	PF3D7_0304000	OG0002283	PVP01_0806900	PF3D7_1007200		OG0003729	PVP01_0728700
OG0002526	PVP01_1268100	OG0003553	PF3D7_0724600	OG0000777	PVP01_0208000	PF3D7_0106800		OG0000573	PVP01_1245400	OG0001196	PF3D7_0411400	OG0001523	PVP01_0724700	PF3D7_0926200		OG0001850	PVP01_1315200	OG0000923	PF3D7_0304200	OG0002289	PVP01_0807700	PF3D7_1008000		OG0005088	PVP01_0728800
OG0004297	PVP01_1269300	OG0004079	PF3D7_0620600	OG0004551	PVP01_1413500	PF3D7_1312500		OG0002639	PVP01_1246800	OG0003529	PF3D7_0411800	OG0001534	PVP01_0726300	PF3D7_0927800		OG0001851	PVP01_1315300	OG0003367	PF3D7_0304300	OG0002290	PVP01_0807800	PF3D7_1008100		OG0003732	PVP01_0729400
OG0002521	PVP01_1269400	OG0001788	PF3D7_1106300	OG0001124	PVP01_0531000	PF3D7_0422500		OG0004369	PVP01_1247400	OG0001197	PF3D7_0411900	OG0003729	PVP01_0728700	PF3D7_0930200		OG0004796	PVP01_1321600	OG0003370	PF3D7_0304900	OG0004809	PVP01_0808300	PF3D7_1008600		OG0001547	PVP01_0729600
OG0002518	PVP01_1269800	OG0003195	PF3D7_1245400	OG0000755	PVP01_0204300	PF3D7_0110800		OG0002634	PVP01_1247500	OG0001198	PF3D7_0412000	OG0003732	PVP01_0729400	PF3D7_0930800		OG0001892	PVP01_1321900	OG0000926	PF3D7_0305000	OG0004175	PVP01_0809500	PF3D7_1009500		OG0003734	PVP01_0729800
OG0001131	PVP01_1300800	OG0002287	PF3D7_1007700	OG0004003	PVP01_1343800	PF3D7_1405000		OG0002632	PVP01_1247900	OG0001347	PF3D7_0413600	OG0001547	PVP01_0729600	PF3D7_0930900		OG0001900	PVP01_1324800	OG0003371	PF3D7_0305100	OG0002299	PVP01_0810100	PF3D7_1010000		OG0003736	PVP01_0730200
OG0003493	PVP01_1303200	OG0001425	PF3D7_0907900	OG0003916	PVP01_1314000	PF3D7_1435500		OG0004368	PVP01_1248300	OG0001356	PF3D7_0415300	OG0003734	PVP01_0729800	PF3D7_0931100		OG0003956	PVP01_1327800	OG0003372	PF3D7_0305200	OG0004178	PVP01_0810200	PF3D7_1010100		OG0000448	PVP01_0730800
OG0003495	PVP01_1303400	OG0001565	PF3D7_0935200	OG0001187	PVP01_1311600	PF3D7_1437900		OG0004367	PVP01_1248400	OG0001357	PF3D7_0415400	OG0000448	PVP01_0730800	PF3D7_0932100		OG0000303	PVP01_1329100	OG0000931	PF3D7_0305700	OG0004179	PVP01_0810400	PF3D7_1010300		OG0001551	PVP01_0730900
OG0001157	PVP01_1305800	OG0004346	PF3D7_1453600	OG0000925	PVP01_0835700	PF3D7_0304500		OG0004364	PVP01_1249000	OG0001358	PF3D7_0415500	OG0001551	PVP01_0730900	PF3D7_0932200		OG0004799	PVP01_1329700	OG0000932	PF3D7_0305800	OG0000534	PVP01_0810500	PF3D7_1010400		OG0001562	PVP01_0733200
OG0003505	PVP01_1306400	OG0002502	PF3D7_0529400	OG0003366	PVP01_0836100	PF3D7_0304100		OG0002624	PVP01_1249700	OG0004904	PF3D7_0415800	OG0001562	PVP01_0733200	PF3D7_0934500		OG0003968	PVP01_1330800	OG0003373	PF3D7_0306100	OG0002308	PVP01_0811600	PF3D7_1011500		OG0003746	PVP01_0733300
OG0004999	PVP01_1308200	OG0001932	PF3D7_1416200	OG0004771	PVP01_0613700	PF3D7_1028600		OG0002614	PVP01_1251500	OG0003600	PF3D7_0416100	OG0003746	PVP01_0733300	PF3D7_0934600		OG0001922	PVP01_1330900	OG0000934	PF3D7_0306200	OG0002310	PVP01_0811900	PF3D7_1011800		OG0001563	PVP01_0733400
OG0001171	PVP01_1308600	OG0005074	PF3D7_0423800	OG0001191	PVP01_1312300	PF3D7_1437200		OG0002611	PVP01_1252500	OG0001361	PF3D7_0416200	OG0001563	PVP01_0733400	PF3D7_0934700		OG0001924	PVP01_1331100	OG0000938	PF3D7_0306800	OG0004186	PVP01_0813300	PF3D7_1013200		OG0005211	PVP01_0734300
OG0003521	PVP01_1312000	OG0000412	PF3D7_0722400	OG0000620	PVP01_1432200	PF3D7_1213400		OG0004347	PVP01_1253100	OG0001362	PF3D7_0416300	OG0002259	PVP01_0803200	PF3D7_1003400		OG0000495	PVP01_1331500	OG0000939	PF3D7_0306900	OG0002320	PVP01_0813500	PF3D7_1013400		OG0002253	PVP01_0802200
OG0000291	PVP01_1312600	OG0001690	PF3D7_1123200	OG0002217	PVP01_1108200	PF3D7_1363800		OG0005570	PVP01_1257800	OG0001363	PF3D7_0416400	OG0002265	PVP01_0804000	PF3D7_1004300		OG0003976	PVP01_1333500	OG0003375	PF3D7_0307600	OG0004190	PVP01_0813900	PF3D7_1013800		OG0004160	PVP01_0802600
OG0001850	PVP01_1315200	OG0000779	PF3D7_0106400	OG0002699	PVP01_1235600	PF3D7_1471200		OG0004331	PVP01_1259200	OG0001364	PF3D7_0416600	OG0004163	PVP01_0804200	PF3D7_1004500		OG0003978	PVP01_1335200	OG0003376	PF3D7_0307700	OG0004192	PVP01_0814600	PF3D7_1014500		OG0002259	PVP01_0803200
OG0001851	PVP01_1315300	OG0002552	PF3D7_1443900	OG0000526	PVP01_1106200	PF3D7_1365800		OG0000563	PVP01_1260400	OG0001365	PF3D7_0416800	OG0002280	PVP01_0806600	PF3D7_1006900		OG0000499	PVP01_1338100	OG0000944	PF3D7_0307900	OG0000537	PVP01_0814700	PF3D7_1014600		OG0002265	PVP01_0804000
OG0001862	PVP01_1316800	OG0003573	PF3D7_0820900	OG0004783	PVP01_0712200	PF3D7_0913800		OG0000323	PVP01_1260800	OG0003603	PF3D7_0416900	OG0002283	PVP01_0806900	PF3D7_1007200		OG0001962	PVP01_1338300	OG0003377	PF3D7_0308300	OG0004196	PVP01_0816100	PF3D7_1016000		OG0004163	PVP01_0804200
OG0003936	PVP01_1321200	OG0002349	PF3D7_0320600	OG0001504	PVP01_0721200	PF3D7_0922700		OG0002556	PVP01_1261500	OG0001368	PF3D7_0417500	OG0002289	PVP01_0807700	PF3D7_1008000		OG0003994	PVP01_1339100	OG0000948	PF3D7_0308500	OG0002334	PVP01_0816500	PF3D7_0323700		OG0002279	PVP01_0806500
OG0004796	PVP01_1321600	OG0004023	PF3D7_0504300	OG0000963	PVP01_0828900	PF3D7_0311300		OG0000321	PVP01_1262700	OG0001370	PF3D7_0417700	OG0002290	PVP01_0807800	PF3D7_1008100		OG0001986	PVP01_1343000	OG0000949	PF3D7_0308700	OG0004204	PVP01_0817600	PF3D7_0322600		OG0002280	PVP01_0806600
OG0001892	PVP01_1321900	OG0000705	PF3D7_0606900	OG0003002	PVP01_1427200	PF3D7_0813100		OG0004314	PVP01_1264900	OG0003607	PF3D7_0417900	OG0004809	PVP01_0808300	PF3D7_1008600		OG0004005	PVP01_1344100	OG0000951	PF3D7_0308900	OG0002343	PVP01_0818400	PF3D7_0321800		OG0002283	PVP01_0806900
OG0001900	PVP01_1324800	OG0002241	PF3D7_1367500	OG0003018	PVP01_1429700	PF3D7_0810600		OG0002542	PVP01_1265000	OG0003608	PF3D7_0418000	OG0004175	PVP01_0809500	PF3D7_1009500		OG0001993	PVP01_1344300	OG0000952	PF3D7_0309000	OG0004208	PVP01_0818500	PF3D7_0321700		OG0002286	PVP01_0807300
OG0001903	PVP01_1325800	OG0001646	PF3D7_1130100	OG0002608	PVP01_1253300	PF3D7_1453700		OG0002541	PVP01_1265100	OG0001375	PF3D7_0418600	OG0002299	PVP01_0810100	PF3D7_1010000		OG0004007	PVP01_1344600	OG0000227	PF3D7_0309200	OG0004212	PVP01_0819100	PF3D7_0321100		OG0002289	PVP01_0807700
OG0003956	PVP01_1327800	OG0002174	PF3D7_1355500	OG0001469	PVP01_0714400	PF3D7_0916000		OG0004303	PVP01_1267000	OG0001376	PF3D7_0418700	OG0004178	PVP01_0810200	PF3D7_1010100		OG0002000	PVP01_1346200	OG0000953	PF3D7_0309500	OG0002346	PVP01_0819300	PF3D7_0320900		OG0002290	PVP01_0807800
OG0000303	PVP01_1329100	OG0004092	PF3D7_0625400	OG0001563	PVP01_0733400	PF3D7_0934700		OG0002526	PVP01_1268100	OG0001377	PF3D7_0419000	OG0004179	PVP01_0810400	PF3D7_1010300		OG0002005	PVP01_1346800	OG0000954	PF3D7_0309600	OG0002350	PVP01_0819700	PF3D7_0320500		OG0004175	PVP01_0809500
OG0004799	PVP01_1329700	OG0001881	PF3D7_1429500	OG0002511	PVP01_1002800	PF3D7_0531000		OG0002518	PVP01_1269800	OG0003612	PF3D7_0419100	OG0002308	PVP01_0811600	PF3D7_1011500		OG0005231	PVP01_1403000	OG0000955	PF3D7_0309700	OG0002354	PVP01_0820200	PF3D7_0320000		OG0002299	PVP01_0810100
OG0001922	PVP01_1330900	OG0002051	PF3D7_0509200	OG0002350	PVP01_0819700	PF3D7_0320500		OG0004861	PVP01_1301400	OG0003613	PF3D7_0419400	OG0002310	PVP01_0811900	PF3D7_1011800		OG0004521	PVP01_1404200	OG0000956	PF3D7_0309800	OG0003651	PVP01_0822900	PF3D7_0317200		OG0004178	PVP01_0810200
OG0001924	PVP01_1331100	OG0001693	PF3D7_1122900	OG0000767	PVP01_0206100	PF3D7_0109000		OG0001136	PVP01_1301700	OG0001382	PF3D7_0419800	OG0004186	PVP01_0813300	PF3D7_1013200		OG0002868	PVP01_1404900	OG0003379	PF3D7_0309900	OG0003652	PVP01_0823000	PF3D7_0317100		OG0004179	PVP01_0810400
OG0000495	PVP01_1331500	OG0003203	PF3D7_1247100	OG0000405	PVP01_1303000	PF3D7_1203700		OG0003495	PVP01_1303400	OG0003615	PF3D7_0419900	OG0002320	PVP01_0813500	PF3D7_1013400		OG0000606	PVP01_1405700	OG0000958	PF3D7_0310300	OG0001419	PVP01_0823200	PF3D7_0316900		OG0000534	PVP01_0810500
OG0003976	PVP01_1333500	OG0001144	PF3D7_1204400	OG0004809	PVP01_0808300	PF3D7_1008600		OG0003505	PVP01_1306400	OG0001117	PF3D7_0420100	OG0000537	PVP01_0814700	PF3D7_1014600		OG0004530	PVP01_1407600	OG0000959	PF3D7_0310400	OG0000287	PVP01_0823500	PF3D7_0316600		OG0002308	PVP01_0811600
OG0001943	PVP01_1334300	OG0001667	PF3D7_1125900	OG0003734	PVP01_0729800	PF3D7_0931100		OG0004999	PVP01_1308200	OG0003476	PF3D7_0420500	OG0004196	PVP01_0816100	PF3D7_1016000		OG0002889	PVP01_1409300	OG0000962	PF3D7_0311100	OG0000980	PVP01_0825500	PF3D7_0314600		OG0002309	PVP01_0811800
OG0003978	PVP01_1335200	OG0002275	PF3D7_1006200	OG0004333	PVP01_1258700	PF3D7_1448300		OG0001171	PVP01_1308600	OG0003477	PF3D7_0420600	OG0002334	PVP01_0816500	PF3D7_0323700		OG0000611	PVP01_1412400	OG0003384	PF3D7_0311200	OG0000963	PVP01_0828900	PF3D7_0311300		OG0002310	PVP01_0811900
OG0001961	PVP01_1338000	OG0003466	PF3D7_1032900	OG0000690	PVP01_1144400	PF3D7_0604500		OG0001178	PVP01_1310000	OG0003478	PF3D7_0421700	OG0004204	PVP01_0817600	PF3D7_0322600		OG0004551	PVP01_1413500	OG0000964	PF3D7_0311400	OG0000285	PVP01_0830000	PF3D7_0310200		OG0000315	PVP01_0813100
OG0000499	PVP01_1338100	OG0001787	PF3D7_1106600	OG0001938	PVP01_1333800	PF3D7_1415100		OG0003521	PVP01_1312000	OG0003480	PF3D7_0421900	OG0002343	PVP01_0818400	PF3D7_0321800		OG0002928	PVP01_1415400	OG0000967	PF3D7_0311800	OG0000943	PVP01_0832700	PF3D7_0307500		OG0004186	PVP01_0813300
OG0003994	PVP01_1339100	OG0002368	PF3D7_0710600	OG0003105	PVP01_1445900	PF3D7_1227700		OG0000291	PVP01_1312600	OG0001122	PF3D7_0422200	OG0004208	PVP01_0818500	PF3D7_0321700		OG0002932	PVP01_1415800	OG0000968	PF3D7_0312000	OG0000941	PVP01_0833000	PF3D7_0307200		OG0002320	PVP01_0813500
OG0001973	PVP01_1340400	OG0001590	PF3D7_1142600	OG0004996	PVP01_1271000	PF3D7_1476100		OG0001850	PVP01_1315200	OG0001123	PF3D7_0422400	OG0004209	PVP01_0818600	PF3D7_0321600		OG0004829	PVP01_1417200	OG0000972	PF3D7_0312400	OG0000929	PVP01_0834700	PF3D7_0305500		OG0004190	PVP01_0813900
OG0001975	PVP01_1341200	OG0000597	PF3D7_1347100	OG0001878	PVP01_1319400	PF3D7_1430000		OG0001851	PVP01_1315300	OG0001126	PF3D7_0422800	OG0004212	PVP01_0819100	PF3D7_0321100		OG0002940	PVP01_1417300	OG0000973	PF3D7_0312800	OG0000927	PVP01_0834900	PF3D7_0305300		OG0000536	PVP01_0814000
OG0004005	PVP01_1344100	OG0004093	PF3D7_0625500	OG0002968	PVP01_1421400	PF3D7_1320600		OG0004796	PVP01_1321600	OG0001128	PF3D7_0423200	OG0002350	PVP01_0819700	PF3D7_0320500		OG0002941	PVP01_1417400	OG0000974	PF3D7_0313200	OG0003368	PVP01_0835600	PF3D7_0304600		OG0004192	PVP01_0814600
OG0002005	PVP01_1346800	OG0002264	PF3D7_1004200	OG0003049	PVP01_1435700	PF3D7_1216900		OG0001892	PVP01_1321900	OG0002017	PF3D7_0503200	OG0002354	PVP01_0820200	PF3D7_0320000		OG0004561	PVP01_1418300	OG0000975	PF3D7_0313300	OG0000925	PVP01_0835700	PF3D7_0304500		OG0004196	PVP01_0816100
OG0004521	PVP01_1404200	OG0003600	PF3D7_0416100	OG0003775	PVP01_0941400	PF3D7_1140700		OG0001900	PVP01_1324800	OG0002022	PF3D7_0504200	OG0003645	PVP01_0821600	PF3D7_0318500		OG0002948	PVP01_1418400	OG0003388	PF3D7_0313400	OG0000924	PVP01_0835800	PF3D7_0304400		OG0002334	PVP01_0816500
OG0002865	PVP01_1404300	OG0002772	PF3D7_1333800	OG0003652	PVP01_0823000	PF3D7_0317100		OG0003956	PVP01_1327800	OG0004023	PF3D7_0504300	OG0003651	PVP01_0822900	PF3D7_0317200		OG0002949	PVP01_1418500	OG0003390	PF3D7_0313600	OG0003366	PVP01_0836100	PF3D7_0304100		OG0004204	PVP01_0817600
OG0002868	PVP01_1404900	OG0001448	PF3D7_0912200	OG0000429	PVP01_0705900	PF3D7_0907400		OG0000303	PVP01_1329100	OG0004024	PF3D7_0504800	OG0003652	PVP01_0823000	PF3D7_0317100		OG0002973	PVP01_1422500	OG0000976	PF3D7_0313700	OG0000908	PVP01_0837700	PF3D7_0302100		OG0002343	PVP01_0818400
OG0004523	PVP01_1405200	OG0001493	PF3D7_0920500	OG0002975	PVP01_1422800	PF3D7_0713700		OG0004799	PVP01_1329700	OG0002027	PF3D7_0505100	OG0001419	PVP01_0823200	PF3D7_0316900		OG0002974	PVP01_1422700	OG0003391	PF3D7_0313800	OG0000481	PVP01_0905000	PF3D7_1104200		OG0004212	PVP01_0819100
OG0002870	PVP01_1405300	OG0003133	PF3D7_1233100	OG0005007	PVP01_1344000	PF3D7_1404800		OG0003968	PVP01_1330800	OG0004025	PF3D7_0505200	OG0000287	PVP01_0823500	PF3D7_0316600		OG0004577	PVP01_1423500	OG0003392	PF3D7_0313900	OG0001794	PVP01_0905700	PF3D7_1104900		OG0002346	PVP01_0819300
OG0000606	PVP01_1405700	OG0002766	PF3D7_1332600	OG0001325	PVP01_0516800	PF3D7_0818500		OG0001922	PVP01_1330900	OG0002029	PF3D7_0505400	OG0000980	PVP01_0825500	PF3D7_0314600		OG0000616	PVP01_1425500	OG0000384	PF3D7_0314100	OG0003876	PVP01_0905800	PF3D7_1105000		OG0002350	PVP01_0819700
OG0002873	PVP01_1405800	OG0002402	PF3D7_0802500	OG0004454	PVP01_1221500	PF3D7_1333200		OG0001924	PVP01_1331100	OG0002031	PF3D7_0505600	OG0000963	PVP01_0828900	PF3D7_0311300		OG0000617	PVP01_1429300	OG0000195	PF3D7_0314700	OG0003866	PVP01_0907900	PF3D7_1107100		OG0000539	PVP01_0820600
OG0002874	PVP01_1405900	OG0001616	PF3D7_1136300	OG0000924	PVP01_0835800	PF3D7_0304400		OG0000495	PVP01_1331500	OG0004026	PF3D7_0505700	OG0000285	PVP01_0830000	PF3D7_0310200		OG0004921	PVP01_1430400	OG0003396	PF3D7_0315000	OG0001783	PVP01_0908100	PF3D7_1107300		OG0003651	PVP01_0822900
OG0004530	PVP01_1407600	OG0003468	PF3D7_1034600	OG0001523	PVP01_0724700	PF3D7_0926200		OG0003976	PVP01_1333500	OG0004028	PF3D7_0506000	OG0000943	PVP01_0832700	PF3D7_0307500		OG0003031	PVP01_1432400	OG0000228	PF3D7_0315200	OG0001778	PVP01_0908600	PF3D7_1107800		OG0003652	PVP01_0823000
OG0002889	PVP01_1409300	OG0000874	PF3D7_0213400	OG0002960	PVP01_1420300	PF3D7_1319400		OG0003978	PVP01_1335200	OG0002034	PF3D7_0506200	OG0000941	PVP01_0833000	PF3D7_0307200		OG0004609	PVP01_1435000	OG0003398	PF3D7_0315700	OG0001777	PVP01_0908800	PF3D7_1108000		OG0001418	PVP01_0823100
OG0000611	PVP01_1412400	OG0001415	PF3D7_0317800	OG0001766	PVP01_0911200	PF3D7_1110400		OG0000499	PVP01_1338100	OG0002035	PF3D7_0506300	OG0000929	PVP01_0834700	PF3D7_0305500		OG0004618	PVP01_1437100	OG0003399	PF3D7_0315800	OG0001767	PVP01_0911100	PF3D7_1110300		OG0001419	PVP01_0823200
OG0002907	PVP01_1412500	OG0001480	PF3D7_0918200	OG0003211	PVP01_1465600	PF3D7_1248500		OG0001962	PVP01_1338300	OG0004029	PF3D7_0506400	OG0000927	PVP01_0834900	PF3D7_0305300		OG0000624	PVP01_1437400	OG0003400	PF3D7_0315900	OG0001766	PVP01_0911200	PF3D7_1110400		OG0000287	PVP01_0823500
OG0002908	PVP01_1412600	OG0003346	PF3D7_0213900	OG0002293	PVP01_0808500	PF3D7_1008800		OG0003994	PVP01_1339100	OG0002037	PF3D7_0506700	OG0003368	PVP01_0835600	PF3D7_0304600		OG0004625	PVP01_1440200	OG0000983	PF3D7_0316000	OG0001755	PVP01_0912800	PF3D7_1112000		OG0000980	PVP01_0825500
OG0002928	PVP01_1415400	OG0002688	PF3D7_1469100	OG0003062	PVP01_1438100	PF3D7_1219700		OG0004800	PVP01_1339500	OG0000506	PF3D7_0506900	OG0000925	PVP01_0835700	PF3D7_0304500		OG0005011	PVP01_1440300	OG0003401	PF3D7_0316200	OG0003856	PVP01_0912900	PF3D7_1112100		OG0000979	PVP01_0825600
OG0002939	PVP01_1417000	OG0000722	PF3D7_0609800	OG0002682	PVP01_1238900	PF3D7_1467900		OG0005228	PVP01_1341100	OG0002039	PF3D7_0507000	OG0000924	PVP01_0835800	PF3D7_0304400		OG0003076	PVP01_1440500	OG0000985	PF3D7_0316400	OG0001750	PVP01_0913900	PF3D7_1113100		OG0004769	PVP01_0825900
OG0004829	PVP01_1417200	OG0005125	PF3D7_1227400	OG0000287	PVP01_0823500	PF3D7_0316600		OG0001986	PVP01_1343000	OG0002040	PF3D7_0507100	OG0000908	PVP01_0837700	PF3D7_0302100		OG0003078	PVP01_1440800	OG0000986	PF3D7_0316500	OG0001736	PVP01_0916500	PF3D7_1115900		OG0000963	PVP01_0828900
OG0002940	PVP01_1417300	OG0003093	PF3D7_1225200	OG0002861	PVP01_1403600	PF3D7_1302700		OG0004005	PVP01_1344100	OG0004030	PF3D7_0507200	OG0000481	PVP01_0905000	PF3D7_1104200		OG0004629	PVP01_1441200	OG0000987	PF3D7_0316700	OG0001732	PVP01_0917300	PF3D7_1116700		OG0000941	PVP01_0833000
OG0004561	PVP01_1418300	OG0001843	PF3D7_1435400	OG0000881	PVP01_0410000	PF3D7_0214900		OG0001993	PVP01_1344300	OG0004031	PF3D7_0507300	OG0001794	PVP01_0905700	PF3D7_1104900		OG0004656	PVP01_1449800	OG0003650	PF3D7_0317300	OG0001731	PVP01_0917500	PF3D7_1116900		OG0000927	PVP01_0834900
OG0002948	PVP01_1418400	OG0004231	PF3D7_0807600	OG0003904	PVP01_0307300	PF3D7_0408000		OG0004007	PVP01_1344600	OG0004032	PF3D7_0507400	OG0003876	PVP01_0905800	PF3D7_1105000		OG0003155	PVP01_1455500	OG0003649	PF3D7_0317500	OG0003842	PVP01_0917900	PF3D7_1117300		OG0000925	PVP01_0835700
OG0002973	PVP01_1422500	OG0000944	PF3D7_0307900	OG0003690	PVP01_0717100	PF3D7_0918700		OG0002000	PVP01_1346200	OG0002041	PF3D7_0507500	OG0003873	PVP01_0906400	PF3D7_1105600		OG0003158	PVP01_1456200	OG0001417	PF3D7_0317600	OG0001724	PVP01_0918800	PF3D7_1118200		OG0000924	PVP01_0835800
OG0002974	PVP01_1422700	OG0003800	PF3D7_1133600	OG0002374	PVP01_0112100	PF3D7_0808300		OG0002005	PVP01_1346800	OG0002042	PF3D7_0507600	OG0003866	PVP01_0907900	PF3D7_1107100		OG0004680	PVP01_1456300	OG0001415	PF3D7_0317800	OG0001712	PVP01_0920600	PF3D7_1120000		OG0003366	PVP01_0836100
OG0004576	PVP01_1423300	OG0000389	PF3D7_1017300	OG0001635	PVP01_0933200	PF3D7_1132400		OG0005124	PVP01_1401300	OG0002043	PF3D7_0507700	OG0001783	PVP01_0908100	PF3D7_1107300		OG0003163	PVP01_1457000	OG0003648	PF3D7_0318000	OG0001710	PVP01_0920900	PF3D7_1120300		OG0000915	PVP01_0836900
OG0004577	PVP01_1423500	OG0004036	PF3D7_0509500	OG0002510	PVP01_1002900	PF3D7_0530900		OG0005231	PVP01_1403000	OG0002044	PF3D7_0507800	OG0001778	PVP01_0908600	PF3D7_1107800		OG0003164	PVP01_1457100	OG0000428	PF3D7_0318200	OG0001709	PVP01_0921100	PF3D7_1120500		OG0000908	PVP01_0837700
OG0000616	PVP01_1425500	OG0003869	PF3D7_1106500	OG0001406	PVP01_0108700	PF3D7_0708400		OG0004521	PVP01_1404200	OG0000306	PF3D7_0508500	OG0001777	PVP01_0908800	PF3D7_1108000		OG0004685	PVP01_1458600	OG0003647	PF3D7_0318300	OG0001707	PVP01_0921600	PF3D7_1121000		OG0000906	PVP01_0837900
OG0002994	PVP01_1426100	OG0004673	PF3D7_1236400	OG0000402	PVP01_0529400	PF3D7_0420000		OG0002868	PVP01_1404900	OG0000508	PF3D7_0508600	OG0001767	PVP01_0911100	PF3D7_1110300		OG0003174	PVP01_1458900	OG0001412	PF3D7_0318600	OG0001706	PVP01_0921700	PF3D7_1121100		OG0001803	PVP01_0903900
OG0003008	PVP01_1427800	OG0001715	PF3D7_1119500	OG0001777	PVP01_0908800	PF3D7_1108000		OG0000265	PVP01_1405400	OG0000509	PF3D7_0508700	OG0001766	PVP01_0911200	PF3D7_1110400		OG0003177	PVP01_1459600	OG0000427	PF3D7_0319000	OG0003832	PVP01_0922200	PF3D7_1121600		OG0000481	PVP01_0905000
OG0000617	PVP01_1429300	OG0000703	PF3D7_0606600	OG0001909	PVP01_1326900	PF3D7_1422100		OG0000606	PVP01_1405700	OG0005221	PF3D7_0508900	OG0001755	PVP01_0912800	PF3D7_1112000		OG0004862	PVP01_1464100	OG0001410	PF3D7_0319100	OG0001694	PVP01_0923400	PF3D7_1122800		OG0003876	PVP01_0905800
OG0004921	PVP01_1430400	OG0004461	PF3D7_1335800	OG0001906	PVP01_1326500	PF3D7_1422500		OG0004530	PVP01_1407600	OG0002050	PF3D7_0509100	OG0003856	PVP01_0912900	PF3D7_1112100		OG0003214	PVP01_1466400	OG0001409	PF3D7_0319200	OG0001693	PVP01_0923500	PF3D7_1122900		OG0001791	PVP01_0906600
OG0003031	PVP01_1432400	OG0002416	PF3D7_0614900	OG0002741	PVP01_1227700	PF3D7_1326700		OG0004534	PVP01_1408900	OG0002051	PF3D7_0509200	OG0001750	PVP01_0913900	PF3D7_1113100		OG0003221	PVP01_1467700	OG0004216	PF3D7_0319700	OG0001692	PVP01_0923600	PF3D7_1123000		OG0003866	PVP01_0907900
OG0003048	PVP01_1435100	OG0001596	PF3D7_1141600	OG0000836	PVP01_0420400	PF3D7_0204700		OG0002889	PVP01_1409300	OG0002052	PF3D7_0509400	OG0001738	PVP01_0915900	PF3D7_1115200		OG0004711	PVP01_1467800	OG0004215	PF3D7_0319800	OG0001691	PVP01_0923700	PF3D7_1123100		OG0001778	PVP01_0908600
OG0004618	PVP01_1437100	OG0004731	PF3D7_0109300	OG0003141	PVP01_1453000	PF3D7_1234900		OG0002893	PVP01_1410300	OG0004036	PF3D7_0509500	OG0001736	PVP01_0916500	PF3D7_1115900		OG0000650	PVP01_MIT02700	OG0002349	PF3D7_0320600	OG0001687	PVP01_0924200	PF3D7_1123600		OG0001777	PVP01_0908800
OG0000624	PVP01_1437400	OG0003219	PF3D7_1250300	OG0003892	PVP01_0304400	PF3D7_0405000		OG0000611	PVP01_1412400	OG0000235	PF3D7_0509800	OG0001732	PVP01_0917300	PF3D7_1116700		OG0004850	PVP01_MIT03300	OG0002348	PF3D7_0320700	OG0004790	PVP01_0927000	PF3D7_1126300		OG0001767	PVP01_0911100
OG0004625	PVP01_1440200	OG0003560	PF3D7_0826900	OG0002289	PVP01_0807700	PF3D7_1008000		OG0002927	PVP01_1415300	OG0002058	PF3D7_0511200	OG0001731	PVP01_0917500	PF3D7_1116900		OG0000904	PVP01_0405400	OG0002347	PF3D7_0320800	OG0004587	PVP01_0927100	PF3D7_1126400		OG0001756	PVP01_0912600
OG0005011	PVP01_1440300	OG0002642	PF3D7_1460300	OG0003675	PVP01_0712500	PF3D7_0914100		OG0002928	PVP01_1415400	OG0004046	PF3D7_0511600	OG0003842	PVP01_0917900	PF3D7_1117300		OG0003316	PVP01_0420800	OG0004211	PF3D7_0321300	OG0001664	PVP01_0927300	PF3D7_1126600		OG0001755	PVP01_0912800
OG0003076	PVP01_1440500	OG0000569	PF3D7_1454700	OG0003829	PVP01_0923300	PF3D7_1122700		OG0002932	PVP01_1415800	OG0002062	PF3D7_0512100	OG0001724	PVP01_0918800	PF3D7_1118200		OG0003568	PVP01_0511400	OG0004207	PF3D7_0322200	OG0003822	PVP01_0927900	PF3D7_1127200		OG0003852	PVP01_0913700
OG0003078	PVP01_1440800	OG0002764	PF3D7_1332300	OG0003432	PVP01_0607500	PF3D7_1022300		OG0004555	PVP01_1415900	OG0004049	PF3D7_0512400	OG0001712	PVP01_0920600	PF3D7_1120000		OG0001440	PVP01_0709200	OG0002339	PF3D7_0322300	OG0001659	PVP01_0928300	PF3D7_1127600		OG0001750	PVP01_0913900
OG0004629	PVP01_1441200	OG0004693	PF3D7_1244400	OG0003802	PVP01_0933600	PF3D7_1132800		OG0004829	PVP01_1417200	OG0002069	PF3D7_0513200	OG0003835	PVP01_0920800	PF3D7_1120200		OG0001530	PVP01_0725800	OG0004206	PF3D7_0322400	OG0001658	PVP01_0928500	PF3D7_1127800		OG0000474	PVP01_0914900
OG0004632	PVP01_1442400	OG0002995	PF3D7_0814000	OG0004128	PVP01_1110800	PF3D7_1361200		OG0002940	PVP01_1417300	OG0002073	PF3D7_0513600	OG0001710	PVP01_0920900	PF3D7_1120300		OG0001532	PVP01_0726100	OG0004205	PF3D7_0322500	OG0003818	PVP01_0928600	PF3D7_1127900		OG0000473	PVP01_0915000
OG0003115	PVP01_1447500	OG0003784	PF3D7_1137900	OG0004558	PVP01_1416800	PF3D7_1315900		OG0002941	PVP01_1417400	OG0002074	PF3D7_0513800	OG0001709	PVP01_0921100	PF3D7_1120500		OG0002258	PVP01_0803100	OG0002338	PF3D7_0322900	OG0001656	PVP01_0928900	PF3D7_1128100		OG0001742	PVP01_0915400
OG0004656	PVP01_1449800	OG0002834	PF3D7_1348100	OG0003755	PVP01_0947200	PF3D7_1146600		OG0004561	PVP01_1418300	OG0002075	PF3D7_0513900	OG0001707	PVP01_0921600	PF3D7_1121000		OG0000907	PVP01_0837800	OG0004201	PF3D7_0323200	OG0003815	PVP01_0929800	PF3D7_1129100		OG0001736	PVP01_0916500
OG0004668	PVP01_1453200	OG0001576	PF3D7_1145300	OG0000625	PVP01_1438000	PF3D7_1219600		OG0002948	PVP01_1418400	OG0000511	PF3D7_0514000	OG0003832	PVP01_0922200	PF3D7_1121600		OG0004892	PVP01_0913600	OG0004199	PF3D7_0323400	OG0003811	PVP01_0931900	PF3D7_1131100		OG0001732	PVP01_0917300
OG0003158	PVP01_1456200	OG0001821	PF3D7_0407500	OG0001736	PVP01_0916500	PF3D7_1115900		OG0002949	PVP01_1418500	OG0002076	PF3D7_0514100	OG0001694	PVP01_0923400	PF3D7_1122800		OG0001749	PVP01_0914000	OG0002336	PF3D7_0323500	OG0003810	PVP01_0932000	PF3D7_1131200		OG0001731	PVP01_0917500
OG0004680	PVP01_1456300	OG0001139	PF3D7_1203200	OG0003152	PVP01_1455000	PF3D7_1236900		OG0002973	PVP01_1422500	OG0004054	PF3D7_0514200	OG0001693	PVP01_0923500	PF3D7_1122900		OG0000475	PVP01_0914100	OG0004198	PF3D7_0323800	OG0003805	PVP01_0932700	PF3D7_1131900		OG0003842	PVP01_0917900
OG0003163	PVP01_1457000	OG0003092	PF3D7_1224900	OG0001264	PVP01_0505700	PF3D7_0828700		OG0002974	PVP01_1422700	OG0004058	PF3D7_0514900	OG0001692	PVP01_0923600	PF3D7_1123000		OG0005378	PVP01_0916450	OG0001804	PF3D7_0403100	OG0001638	PVP01_0932800	PF3D7_1132000		OG0001724	PVP01_0918800
OG0003164	PVP01_1457100	OG0003859	PF3D7_1111400	OG0003199	PVP01_1463400	PF3D7_1246300		OG0004577	PVP01_1423500	OG0002079	PF3D7_0515000	OG0001691	PVP01_0923700	PF3D7_1123100		OG0001669	PVP01_0926200	OG0003879	PF3D7_0403200	OG0001635	PVP01_0933200	PF3D7_1132400		OG0001723	PVP01_0918900
OG0004685	PVP01_1458600	OG0000738	PF3D7_0612100	OG0004437	PVP01_1227000	PF3D7_1327400		OG0000616	PVP01_1425500	OG0004059	PF3D7_0515100	OG0003828	PVP01_0924100	PF3D7_1123500		OG0004264	PVP01_1010400	OG0001806	PF3D7_0403700	OG0003802	PVP01_0933600	PF3D7_1132800		OG0003836	PVP01_0920300
OG0003174	PVP01_1458900	OG0002119	PF3D7_0623000	OG0002231	PVP01_1106300	PF3D7_1365700		OG0000617	PVP01_1429300	OG0000512	PF3D7_0515200	OG0001687	PVP01_0924200	PF3D7_1123600		OG0000281	PVP01_1136100	OG0003886	PF3D7_0404300	OG0004944	PVP01_0933800	PF3D7_1133000		OG0001712	PVP01_0920600
OG0003175	PVP01_1459000	OG0000602	PF3D7_1351300	OG0003844	PVP01_0917400	PF3D7_1116800		OG0004921	PVP01_1430400	OG0002080	PF3D7_0515300	OG0004790	PVP01_0927000	PF3D7_1126300		OG0000688	PVP01_1144700	OG0003889	PF3D7_0404600	OG0003801	PVP01_0933900	PF3D7_1133100		OG0001711	PVP01_0920700
OG0003177	PVP01_1459600	OG0003248	PF3D7_0602900	OG0003691	PVP01_0717800	PF3D7_0919400		OG0003031	PVP01_1432400	OG0002081	PF3D7_0515400	OG0004587	PVP01_0927100	PF3D7_1126400		OG0004516	PVP01_1202500	OG0001808	PF3D7_0404700	OG0001631	PVP01_0934200	PF3D7_1133400		OG0003835	PVP01_0920800
OG0003187	PVP01_1461200	OG0002635	PF3D7_1459600	OG0003572	PVP01_0513200	PF3D7_0821100		OG0004609	PVP01_1435000	OG0002083	PF3D7_0515700	OG0001664	PVP01_0927300	PF3D7_1126600		OG0002842	PVP01_1205100	OG0003891	PF3D7_0404900	OG0001627	PVP01_0934800	PF3D7_1134000		OG0001710	PVP01_0920900
OG0004862	PVP01_1464100	OG0004351	PF3D7_1454900	OG0003151	PVP01_1454900	PF3D7_1236800		OG0004614	PVP01_1435800	OG0002425	PF3D7_0516000	OG0001661	PVP01_0927800	PF3D7_1127100		OG0004478	PVP01_1212600	OG0003893	PF3D7_0405200	OG0003797	PVP01_0935100	PF3D7_1134300		OG0004858	PVP01_0921000
OG0003214	PVP01_1466400	OG0004046	PF3D7_0511600	OG0001490	PVP01_0718200	PF3D7_0919800		OG0004618	PVP01_1437100	OG0002429	PF3D7_0516500	OG0003822	PVP01_0927900	PF3D7_1127200		OG0004409	PVP01_1234300	OG0001810	PF3D7_0405400	OG0001614	PVP01_0937800	PF3D7_1136900		OG0001709	PVP01_0921100
OG0003221	PVP01_1467700	OG0000556	PF3D7_1474300	OG0003016	PVP01_1429400	PF3D7_0810900		OG0000624	PVP01_1437400	OG0004251	PF3D7_0516600	OG0001659	PVP01_0928300	PF3D7_1127600		OG0002681	PVP01_1239100	OG0001811	PF3D7_0405600	OG0001612	PVP01_0938100	PF3D7_1137200		OG0001707	PVP01_0921600
OG0004711	PVP01_1467800	OG0004689	PF3D7_1242400	OG0000758	PVP01_0204700	PF3D7_0110400		OG0004625	PVP01_1440200	OG0002430	PF3D7_0516800	OG0001658	PVP01_0928500	PF3D7_1127800		OG0004363	PVP01_1249100	OG0001814	PF3D7_0405900	OG0003785	PVP01_0938800	PF3D7_1137800		OG0001706	PVP01_0921700
OG0000650	PVP01_MIT02700	OG0004714	PF3D7_1251600	OG0003510	PVP01_1307900	PF3D7_1208800		OG0005011	PVP01_1440300	OG0002431	PF3D7_0516900	OG0003818	PVP01_0928600	PF3D7_1127900		OG0004310	PVP01_1265900	OG0004953	PF3D7_0406200	OG0000258	PVP01_0939500	PF3D7_1138500		OG0003832	PVP01_0922200
OG0004850	PVP01_MIT03300	OG0002058	PF3D7_0511200	OG0003446	PVP01_0611200	PF3D7_1026000		OG0003076	PVP01_1440500	OG0002432	PF3D7_0517000	OG0001656	PVP01_0928900	PF3D7_1128100		OG0003492	PVP01_1303100	OG0001817	PF3D7_0406400	OG0003781	PVP01_0939800	PF3D7_1138800		OG0003829	PVP01_0923300
OG0001205	PVP01_0312900	OG0002930	PF3D7_1314700	OG0004262	PVP01_1011000	PF3D7_0522900		OG0003078	PVP01_1440800	OG0002433	PF3D7_0517100	OG0003815	PVP01_0929800	PF3D7_1129100		OG0001859	PVP01_1316500	OG0003895	PF3D7_0406500	OG0003778	PVP01_0940900	PF3D7_1140200		OG0001694	PVP01_0923400
OG0000904	PVP01_0405400	OG0000697	PF3D7_0605500	OG0002259	PVP01_0803200	PF3D7_1003400		OG0004629	PVP01_1441200	OG0002434	PF3D7_0517300	OG0003811	PVP01_0931900	PF3D7_1131100		OG0001887	PVP01_1320800	OG0003897	PF3D7_0406700	OG0003775	PVP01_0941400	PF3D7_1140700		OG0001692	PVP01_0923600
OG0003316	PVP01_0420800	OG0004398	PF3D7_1469500	OG0000628	PVP01_1440900	PF3D7_1222700		OG0004656	PVP01_1449800	OG0002436	PF3D7_0517500	OG0003810	PVP01_0932000	PF3D7_1131200		OG0003963	PVP01_1329600	OG0001818	PF3D7_0406800	OG0001592	PVP01_0943000	PF3D7_1142300		OG0003828	PVP01_0924100
OG0003568	PVP01_0511400	OG0004132	PF3D7_1362600	OG0004563	PVP01_1419200	PF3D7_1318300		OG0003134	PVP01_1451500	OG0002437	PF3D7_0517600	OG0003805	PVP01_0932700	PF3D7_1131900		OG0005005	PVP01_1335600	OG0003898	PF3D7_0406900	OG0003766	PVP01_0943600	PF3D7_1142900		OG0001687	PVP01_0924200
OG0001129	PVP01_0532000	OG0002378	PF3D7_0807300	OG0003060	PVP01_1437800	PF3D7_1219000		OG0003155	PVP01_1455500	OG0004253	PF3D7_0518100	OG0001638	PVP01_0932800	PF3D7_1132000		OG0002967	PVP01_1421300	OG0003901	PF3D7_0407400	OG0003761	PVP01_0944900	PF3D7_1144200		OG0001680	PVP01_0924900
OG0001015	PVP01_0603200	OG0001116	PF3D7_1037800	OG0004090	PVP01_1124600	PF3D7_0624900		OG0003158	PVP01_1456200	OG0002445	PF3D7_0518500	OG0001635	PVP01_0933200	PF3D7_1132400		OG0003089	PVP01_1442700	OG0001821	PF3D7_0407500	OG0003760	PVP01_0945000	PF3D7_1144300		OG0005097	PVP01_0925500
OG0003417	PVP01_0603300	OG0002354	PF3D7_0320000	OG0004770	PVP01_0611700	PF3D7_1026500		OG0004680	PVP01_1456300	OG0004893	PF3D7_0518700	OG0003802	PVP01_0933600	PF3D7_1132800		OG0003171	PVP01_1458100	OG0003902	PF3D7_0407600	OG0005219	PVP01_0945500	PF3D7_1144800		OG0001670	PVP01_0926100
OG0001532	PVP01_0726100	OG0000795	PF3D7_0103400	OG0002292	PVP01_0808200	PF3D7_1008500		OG0003163	PVP01_1457000	OG0002447	PF3D7_0518900	OG0004944	PVP01_0933800	PF3D7_1133000		OG0003183	PVP01_1460800	OG0001822	PF3D7_0407700	OG0001577	PVP01_0945900	PF3D7_1145200		OG0000468	PVP01_0926700
OG0002258	PVP01_0803100	OG0003061	PF3D7_1219100	OG0000544	PVP01_1017300	PF3D7_0516700		OG0003164	PVP01_1457100	OG0002450	PF3D7_0519300	OG0003801	PVP01_0933900	PF3D7_1133100		OG0005127	PVP01_1463300	OG0003903	PF3D7_0407800	OG0001576	PVP01_0946000	PF3D7_1145300		OG0001665	PVP01_0926900
OG0004811	PVP01_0809900	OG0003654	PF3D7_0907100	OG0004050	PVP01_1021400	PF3D7_0512500		OG0004685	PVP01_1458600	OG0000546	PF3D7_0519800	OG0001631	PVP01_0934200	PF3D7_1133400		OG0003206	PVP01_1464500	OG0001823	PF3D7_0407900	OG0001573	PVP01_0946800	PF3D7_1146100		OG0004790	PVP01_0927000
OG0004892	PVP01_0913600	OG0003369	PF3D7_0304800	OG0002246	PVP01_1103800	PF3D7_1368200		OG0003174	PVP01_1458900	OG0004975	PF3D7_0520500	OG0001627	PVP01_0934800	PF3D7_1134000		OG0000268	PVP01_1465300	OG0001825	PF3D7_0408400	OG0003755	PVP01_0947200	PF3D7_1146600		OG0004587	PVP01_0927100
OG0001749	PVP01_0914000	OG0002578	PF3D7_1448900	OG0001154	PVP01_1305500	PF3D7_1206400		OG0003177	PVP01_1459600	OG0002458	PF3D7_0520600	OG0003797	PVP01_0935100	PF3D7_1134300		OG0004815	PVP01_0113700	OG0001827	PF3D7_0409000	OG0003752	PVP01_0947700	PF3D7_1147100		OG0001662	PVP01_0927700
OG0001677	PVP01_0925200	OG0000999	PF3D7_0904400	OG0002405	PVP01_0118000	PF3D7_0802200		OG0004862	PVP01_1464100	OG0002459	PF3D7_0520700	OG0003792	PVP01_0936900	PF3D7_1136000		OG0001243	PVP01_0318600	OG0001829	PF3D7_0409300	OG0000296	PVP01_0947900	PF3D7_1147300		OG0001661	PVP01_0927800
OG0002842	PVP01_1205100	OG0003986	PF3D7_1411500	OG0003453	PVP01_0613800	PF3D7_1028700		OG0003214	PVP01_1466400	OG0004256	PF3D7_0520800	OG0001614	PVP01_0937800	PF3D7_1136900		OG0000875	PVP01_0411200	OG0001831	PF3D7_0409500	OG0003750	PVP01_0948200	PF3D7_1147600		OG0003822	PVP01_0927900
OG0002684	PVP01_1238600	OG0003269	PF3D7_0611600	OG0003547	PVP01_0317900	PF3D7_0722200		OG0003221	PVP01_1467700	OG0004914	PF3D7_0521000	OG0001612	PVP01_0938100	PF3D7_1137200		OG0001299	PVP01_0510900	OG0001832	PF3D7_0409600	OG0001568	PVP01_0948300	PF3D7_1147700		OG0001658	PVP01_0928500
OG0004310	PVP01_1265900	OG0000952	PF3D7_0309000	OG0001324	PVP01_0516600	PF3D7_0818700		OG0004711	PVP01_1467800	OG0002461	PF3D7_0521200	OG0003785	PVP01_0938800	PF3D7_1137800		OG0001378	PVP01_0528600	OG0001833	PF3D7_0409700	OG0004291	PVP01_1002400	PF3D7_0531400		OG0003818	PVP01_0928600
OG0003492	PVP01_1303100	OG0000428	PF3D7_0318200	OG0000743	PVP01_1135400	PF3D7_0613700		OG0003224	PVP01_1468100	OG0000549	PF3D7_0521700	OG0000258	PVP01_0939500	PF3D7_1138500		OG0001379	PVP01_0528700	OG0004795	PF3D7_0410000	OG0002511	PVP01_1002800	PF3D7_0531000		OG0001656	PVP01_0928900
OG0001859	PVP01_1316500	OG0003745	PF3D7_0934400	OG0000574	PVP01_1244500	PF3D7_1462300		OG0000650	PVP01_MIT02700	OG0002467	PF3D7_0522500	OG0003781	PVP01_0939800	PF3D7_1138800		OG0002285	PVP01_0807100	OG0001835	PF3D7_0410300	OG0002510	PVP01_1002900	PF3D7_0530900		OG0001648	PVP01_0930500
OG0003963	PVP01_1329600	OG0000888	PF3D7_0216600	OG0002462	PVP01_1012600	PF3D7_0521300		OG0004850	PVP01_MIT03300	OG0002468	PF3D7_0522600	OG0003778	PVP01_0940900	PF3D7_1140200		OG0004187	PVP01_0813400	OG0003910	PF3D7_0410500	OG0004819	PVP01_1003900	PF3D7_0530000		OG0003811	PVP01_0931900
OG0004737	PVP01_1418100	OG0000545	PF3D7_0518800	OG0001551	PVP01_0730900	PF3D7_0932200		OG0002358	PVP01_0109100	OG0004263	PF3D7_0523200	OG0003775	PVP01_0941400	PF3D7_1140700		OG0002329	PVP01_0815200	OG0001837	PF3D7_0410600	OG0002505	PVP01_1004000	PF3D7_0529900		OG0003810	PVP01_0932000
OG0005127	PVP01_1463300	OG0004342	PF3D7_1452800	OG0002472	PVP01_1010500	PF3D7_0523400		OG0001217	PVP01_0314700	OG0004267	PF3D7_0524100	OG0001592	PVP01_0943000	PF3D7_1142300		OG0000947	PVP01_0832000	OG0001838	PF3D7_0410700	OG0002502	PVP01_1004500	PF3D7_0529400		OG0003805	PVP01_0932700
OG0001385	PVP01_0103300	OG0001611	PF3D7_1137500	OG0003732	PVP01_0729400	PF3D7_0930800		OG0000231	PVP01_0314900	OG0002479	PF3D7_0525100	OG0003766	PVP01_0943600	PF3D7_1142900		OG0003863	PVP01_0909900	OG0001193	PF3D7_0410900	OG0002493	PVP01_1006300	PF3D7_0527500		OG0001638	PVP01_0932800
OG0004815	PVP01_0113700	OG0003136	PF3D7_1234000	OG0002364	PVP01_0110300	PF3D7_0709900		OG0000904	PVP01_0405400	OG0002481	PF3D7_0525300	OG0003761	PVP01_0944900	PF3D7_1144200		OG0003786	PVP01_0938700	OG0003526	PF3D7_0411000	OG0004274	PVP01_1008000	PF3D7_0525800		OG0003802	PVP01_0933600
OG0000875	PVP01_0411200	OG0003465	PF3D7_1032600	OG0003344	PVP01_0411300	PF3D7_0213600		OG0003316	PVP01_0420800	OG0002482	PF3D7_0525400	OG0003760	PVP01_0945000	PF3D7_1144300		OG0001584	PVP01_0944700	OG0001196	PF3D7_0411400	OG0002480	PVP01_1008600	PF3D7_0525200		OG0004944	PVP01_0933800
OG0001299	PVP01_0510900	OG0001227	PF3D7_0720200	OG0002018	PVP01_1030500	PF3D7_0503400		OG0003568	PVP01_0511400	OG0002483	PF3D7_0525500	OG0005219	PVP01_0945500	PF3D7_1144800		OG0002475	PVP01_1009500	OG0003529	PF3D7_0411800	OG0002474	PVP01_1010000	PF3D7_0523900		OG0001631	PVP01_0934200
OG0001379	PVP01_0528700	OG0000813	PF3D7_0728900	OG0003912	PVP01_1313200	PF3D7_1436300		OG0000423	PVP01_0520700	OG0004273	PF3D7_0525700	OG0001576	PVP01_0946000	PF3D7_1145300		OG0004091	PVP01_1124300	OG0001197	PF3D7_0411900	OG0002472	PVP01_1010500	PF3D7_0523400		OG0001627	PVP01_0934800
OG0003460	PVP01_0616200	OG0001831	PF3D7_0409500	OG0004150	PVP01_1103600	PF3D7_1368400		OG0001017	PVP01_0603700	OG0004275	PF3D7_0525900	OG0001573	PVP01_0946800	PF3D7_1146100		OG0004393	PVP01_1239700	OG0001347	PF3D7_0413600	OG0004262	PVP01_1011000	PF3D7_0522900		OG0003797	PVP01_0935100
OG0003681	PVP01_0714300	OG0004553	PF3D7_1313800	OG0004192	PVP01_0814600	PF3D7_1014500		OG0001041	PVP01_0608100	OG0004276	PF3D7_0526000	OG0003755	PVP01_0947200	PF3D7_1146600		OG0002613	PVP01_1251700	OG0000422	PF3D7_0413700	OG0002466	PVP01_1011500	PF3D7_0522400		OG0003792	PVP01_0936900
OG0001503	PVP01_0721100	OG0004500	PF3D7_1348000	OG0002038	PVP01_1027200	PF3D7_0506800		OG0003456	PVP01_0614600	OG0002485	PF3D7_0526300	OG0003753	PVP01_0947600	PF3D7_1147000		OG0004337	PVP01_1256000	OG0001350	PF3D7_0414300	OG0004261	PVP01_1011700	PF3D7_0522200		OG0000298	PVP01_0937400
OG0002285	PVP01_0807100	OG0000843	PF3D7_0206000	OG0003746	PVP01_0733300	PF3D7_0934600		OG0001115	PVP01_0622100	OG0000553	PF3D7_0526500	OG0003752	PVP01_0947700	PF3D7_1147100		OG0002563	PVP01_1260200	OG0001356	PF3D7_0415300	OG0004260	PVP01_1011800	PF3D7_0522100		OG0001614	PVP01_0937800
OG0004187	PVP01_0813400	OG0000442	PF3D7_0926300	OG0000497	PVP01_1334500	PF3D7_1414400		OG0004967	PVP01_0706000	OG0002488	PF3D7_0526900	OG0000296	PVP01_0947900	PF3D7_1147300		OG0004919	PVP01_1305200	OG0001357	PF3D7_0415400	OG0004259	PVP01_1011900	PF3D7_0522000		OG0001612	PVP01_0938100
OG0002329	PVP01_0815200	OG0002732	PF3D7_1324400	OG0003781	PVP01_0939800	PF3D7_1138800		OG0001440	PVP01_0709200	OG0002489	PF3D7_0527000	OG0003750	PVP01_0948200	PF3D7_1147600		OG0003514	PVP01_1309500	OG0001358	PF3D7_0415500	OG0002462	PVP01_1012600	PF3D7_0521300		OG0000258	PVP01_0939500
OG0000947	PVP01_0832000	OG0002867	PF3D7_1303800	OG0001111	PVP01_0621300	PF3D7_1036900		OG0001530	PVP01_0725800	OG0002491	PF3D7_0527200	OG0001568	PVP01_0948300	PF3D7_1147700		OG0000290	PVP01_1311200	OG0004904	PF3D7_0415800	OG0002454	PVP01_1014200	PF3D7_0519700		OG0005098	PVP01_0940300
OG0003863	PVP01_0909900	OG0000324	PF3D7_1455100	OG0003003	PVP01_1427300	PF3D7_0813000		OG0001532	PVP01_0726100	OG0004279	PF3D7_0527400	OG0000257	PVP01_0948400	PF3D7_1147800		OG0002001	PVP01_1346400	OG0003600	PF3D7_0416100	OG0002449	PVP01_1014700	PF3D7_0519200		OG0003775	PVP01_0941400
OG0001584	PVP01_0944700	OG0003448	PF3D7_1026300	OG0003080	PVP01_1441500	PF3D7_1223300		OG0002258	PVP01_0803100	OG0004280	PF3D7_0527600	OG0004291	PVP01_1002400	PF3D7_0531400		OG0002961	PVP01_1420400	OG0001361	PF3D7_0416200	OG0000318	PVP01_1014900	PF3D7_0519000		OG0001595	PVP01_0942400
OG0002178	PVP01_1115600	OG0001410	PF3D7_0319100	OG0002617	PVP01_1251100	PF3D7_1455800		OG0004811	PVP01_0809900	OG0004281	PF3D7_0528500	OG0002511	PVP01_1002800	PF3D7_0531000		OG0004594	PVP01_1429600	OG0001362	PF3D7_0416300	OG0002446	PVP01_1015300	PF3D7_0518600		OG0001594	PVP01_0942500
OG0004091	PVP01_1124300	OG0003154	PF3D7_1237100	OG0000853	PVP01_0415700	PF3D7_0209100		OG0002332	PVP01_0815800	OG0004282	PF3D7_0528600	OG0002510	PVP01_1002900	PF3D7_0530900		OG0003038	PVP01_1433500	OG0001363	PF3D7_0416400	OG0002440	PVP01_1016000	PF3D7_0517900		OG0001592	PVP01_0943000
OG0004393	PVP01_1239700	OG0004176	PF3D7_1009800	OG0001011	PVP01_0602200	PF3D7_1017000		OG0000907	PVP01_0837800	OG0002499	PF3D7_0529000	OG0004819	PVP01_1003900	PF3D7_0530000		OG0003069	PVP01_1439200	OG0001364	PF3D7_0416600	OG0000544	PVP01_1017300	PF3D7_0516700		OG0003766	PVP01_0943600
OG0002613	PVP01_1251700	OG0003554	PF3D7_0725100	OG0002408	PVP01_0118400	PF3D7_0801800		OG0004892	PVP01_0913600	OG0002501	PF3D7_0529300	OG0002505	PVP01_1004000	PF3D7_0529900				OG0001365	PF3D7_0416800	OG0004050	PVP01_1021400	PF3D7_0512500		OG0003760	PVP01_0945000
OG0004337	PVP01_1256000	OG0004953	PF3D7_0406200	OG0001397	PVP01_0106700	PF3D7_0706500		OG0001749	PVP01_0914000	OG0004285	PF3D7_0529800	OG0002502	PVP01_1004500	PF3D7_0529400				OG0003603	PF3D7_0416900	OG0002061	PVP01_1022000	PF3D7_0512000		OG0005219	PVP01_0945500
OG0002563	PVP01_1260200	OG0003767	PF3D7_1142500	OG0004444	PVP01_1224800	PF3D7_1329700		OG0000475	PVP01_0914100	OG0002506	PF3D7_0530100	OG0002493	PVP01_1006300	PF3D7_0527500				OG0001368	PF3D7_0417500	OG0004045	PVP01_1022500	PF3D7_0511500		OG0001578	PVP01_0945600
OG0004919	PVP01_1305200	OG0004512	PF3D7_1350800	OG0001051	PVP01_0610200	PF3D7_1025000		OG0005378	PVP01_0916450	OG0000355	PF3D7_0602100	OG0004274	PVP01_1008000	PF3D7_0525800				OG0001370	PF3D7_0417700	OG0004044	PVP01_1022600	PF3D7_0511400		OG0001573	PVP01_0946800
OG0003514	PVP01_1309500	OG0002759	PF3D7_1331600	OG0000266	PVP01_1430000	PF3D7_0810300		OG0001718	PVP01_0919800	OG0000678	PF3D7_0602800	OG0002480	PVP01_1008600	PF3D7_0525200				OG0003607	PF3D7_0417900	OG0002059	PVP01_1022700	PF3D7_0511300		OG0003755	PVP01_0947200
OG0000290	PVP01_1311200	OG0001479	PF3D7_0918000	OG0004502	PVP01_1206200	PF3D7_1348600		OG0001702	PVP01_0922100	OG0003248	PF3D7_0602900	OG0002472	PVP01_1010500	PF3D7_0523400				OG0003608	PF3D7_0418000	OG0002056	PVP01_1023500	PF3D7_0510500		OG0003752	PVP01_0947700
OG0002001	PVP01_1346400	OG0000825	PF3D7_0730400	OG0002808	PVP01_1212700	PF3D7_1342100		OG0001669	PVP01_0926200	OG0000682	PF3D7_0603400	OG0004262	PVP01_1011000	PF3D7_0522900				OG0001372	PF3D7_0418100	OG0004041	PVP01_1023900	PF3D7_0510100		OG0003750	PVP01_0948200
OG0002961	PVP01_1420400	OG0003012	PF3D7_0811900	OG0000745	PVP01_1134900	PF3D7_0614200		OG0000552	PVP01_1007600	OG0000686	PF3D7_0603800	OG0002466	PVP01_1011500	PF3D7_0522400				OG0001375	PF3D7_0418600	OG0004040	PVP01_1024000	PF3D7_0510000		OG0001568	PVP01_0948300
OG0004594	PVP01_1429600	OG0003299	PF3D7_0102800	OG0003676	PVP01_0712900	PF3D7_0914500		OG0004264	PVP01_1010400	OG0003250	PF3D7_0604000	OG0004261	PVP01_1011700	PF3D7_0522200				OG0001376	PF3D7_0418700	OG0002045	PVP01_1025900	PF3D7_0508100		OG0000257	PVP01_0948400
OG0003038	PVP01_1433500	OG0002017	PF3D7_0503200	OG0003484	PVP01_0531800	PF3D7_0423300		OG0002053	PVP01_1023800	OG0003251	PF3D7_0604100	OG0004260	PVP01_1011800	PF3D7_0522100				OG0001377	PF3D7_0419000	OG0004034	PVP01_1026000	PF3D7_0508000		OG0002512	PVP01_1002700
OG0003058	PVP01_1437300	OG0003657	PF3D7_0908200	OG0003692	PVP01_0717900	PF3D7_0919500		OG0004806	PVP01_1109300	OG0004982	PF3D7_0604600	OG0004259	PVP01_1011900	PF3D7_0522000				OG0003612	PF3D7_0419100	OG0002038	PVP01_1027200	PF3D7_0506800		OG0002511	PVP01_1002800
OG0003069	PVP01_1439200	OG0004586	PF3D7_0813500	OG0001691	PVP01_0923700	PF3D7_1123100		OG0000281	PVP01_1136100	OG0000695	PF3D7_0605200	OG0004257	PVP01_1012300	PF3D7_0521600				OG0003613	PF3D7_0419400	OG0002036	PVP01_1027500	PF3D7_0506500		OG0002510	PVP01_1002900
OG0003086	PVP01_1442300	OG0001839	PF3D7_1436600	OG0003030	PVP01_1431800	PF3D7_1212900		OG0000688	PVP01_1144700	OG0000697	PF3D7_0605500	OG0002462	PVP01_1012600	PF3D7_0521300				OG0001382	PF3D7_0419800	OG0002030	PVP01_1028500	PF3D7_0505500		OG0002507	PVP01_1003300
OG0000634	PVP01_1449300	OG0004675	PF3D7_1237200	OG0002644	PVP01_1246200	PF3D7_1460600		OG0004516	PVP01_1202500	OG0003255	PF3D7_0605600	OG0002454	PVP01_1014200	PF3D7_0519700				OG0003615	PF3D7_0419900	OG0002020	PVP01_1030200	PF3D7_0503800		OG0004819	PVP01_1003900
		OG0004485	PF3D7_1344900	OG0003190	PVP01_1461800	PF3D7_1244700		OG0002842	PVP01_1205100	OG0003256	PF3D7_0605700	OG0002452	PVP01_1014400	PF3D7_0519500				OG0001117	PF3D7_0420100	OG0004022	PVP01_1030300	PF3D7_0503600		OG0002502	PVP01_1004500
		OG0001377	PF3D7_0419000	OG0002564	PVP01_1260100	PF3D7_1446900		OG0004505	PVP01_1205800	OG0000698	PF3D7_0605800	OG0002449	PVP01_1014700	PF3D7_0519200				OG0003476	PF3D7_0420500	OG0002018	PVP01_1030500	PF3D7_0503400		OG0002497	PVP01_1005500
		OG0000706	PF3D7_0607000	OG0003253	PVP01_1143800	PF3D7_0605100		OG0002828	PVP01_1208600	OG0000700	PF3D7_0606100	OG0000318	PVP01_1014900	PF3D7_0519000				OG0003477	PF3D7_0420600	OG0004017	PVP01_1032700	PF3D7_0502300		OG0002496	PVP01_1005600
		OG0003845	PF3D7_1116300	OG0001732	PVP01_0917300	PF3D7_1116700		OG0004478	PVP01_1212600	OG0000703	PF3D7_0606600	OG0002446	PVP01_1015300	PF3D7_0518600				OG0003478	PF3D7_0421700	OG0004150	PVP01_1103600	PF3D7_1368400		OG0002493	PVP01_1006300
		OG0003208	PF3D7_1247800	OG0003130	PVP01_1450600	PF3D7_1232400		OG0000591	PVP01_1221300	OG0000704	PF3D7_0606700	OG0002440	PVP01_1016000	PF3D7_0517900				OG0003480	PF3D7_0421900	OG0002237	PVP01_1105100	PF3D7_1366900		OG0004274	PVP01_1008000
		OG0002079	PF3D7_0515000	OG0001976	PVP01_1341400	PF3D7_1407300		OG0002681	PVP01_1239100	OG0000705	PF3D7_0606900	OG0000544	PVP01_1017300	PF3D7_0516700				OG0001122	PF3D7_0422200	OG0002232	PVP01_1105900	PF3D7_1366100		OG0004268	PVP01_1009700
		OG0002124	PF3D7_0623900	OG0002181	PVP01_1115100	PF3D7_1356800		OG0004385	PVP01_1242000	OG0000706	PF3D7_0607000	OG0002077	PVP01_1019400	PF3D7_0514500				OG0001123	PF3D7_0422400	OG0000526	PVP01_1106200	PF3D7_1365800		OG0002472	PVP01_1010500
		OG0004324	PF3D7_1444700	OG0002800	PVP01_1213900	PF3D7_1340900		OG0004363	PVP01_1249100	OG0000710	PF3D7_0607400	OG0004050	PVP01_1021400	PF3D7_0512500				OG0001126	PF3D7_0422800	OG0002231	PVP01_1106300	PF3D7_1365700		OG0004262	PVP01_1011000
		OG0003410	PF3D7_0904700	OG0002030	PVP01_1028500	PF3D7_0505500		OG0002544	PVP01_1264700	OG0000713	PF3D7_0607700	OG0002061	PVP01_1022000	PF3D7_0512000				OG0001128	PF3D7_0423200	OG0002217	PVP01_1108200	PF3D7_1363800		OG0002466	PVP01_1011500
		OG0001609	PF3D7_1138400	OG0004208	PVP01_0818500	PF3D7_0321700		OG0004310	PVP01_1265900	OG0000714	PF3D7_0608000	OG0004045	PVP01_1022500	PF3D7_0511500				OG0005074	PF3D7_0423800	OG0002205	PVP01_1110200	PF3D7_1361800		OG0004261	PVP01_1011700
		OG0001057	PF3D7_1025900	OG0002170	PVP01_1117400	PF3D7_1354400		OG0003488	PVP01_1301600	OG0003261	PF3D7_0608100	OG0004044	PVP01_1022600	PF3D7_0511400				OG0002016	PF3D7_0503000	OG0004128	PVP01_1110800	PF3D7_1361200		OG0004260	PVP01_1011800
		OG0004448	PF3D7_1330200	OG0001007	PVP01_0701700	PF3D7_0903300		OG0003492	PVP01_1303100	OG0000719	PF3D7_0609300	OG0002059	PVP01_1022700	PF3D7_0511300				OG0002017	PF3D7_0503200	OG0002203	PVP01_1110900	PF3D7_1361100		OG0004259	PVP01_1011900
		OG0003315	PF3D7_0204000	OG0000601	PVP01_1203900	PF3D7_1350900		OG0003513	PVP01_1309400	OG0000722	PF3D7_0609800	OG0002056	PVP01_1023500	PF3D7_0510500				OG0002022	PF3D7_0504200	OG0002201	PVP01_1111200	PF3D7_1360800		OG0004257	PVP01_1012300
		OG0002278	PF3D7_1006700	OG0001990	PVP01_1343500	PF3D7_1405300		OG0001859	PVP01_1316500	OG0000726	PF3D7_0610200	OG0004041	PVP01_1023900	PF3D7_0510100				OG0004023	PF3D7_0504300	OG0004125	PVP01_1112000	PF3D7_1359900		OG0002462	PVP01_1012600
		OG0003222	PF3D7_1250800	OG0004515	PVP01_1202800	PF3D7_1352000		OG0001887	PVP01_1320800	OG0004760	PF3D7_0610700	OG0004040	PVP01_1024000	PF3D7_0510000				OG0004024	PF3D7_0504800	OG0000524	PVP01_1112500	PF3D7_1359400		OG0000319	PVP01_1013800
		OG0004273	PF3D7_0525700	OG0003948	PVP01_1325300	PF3D7_1423700		OG0003963	PVP01_1329600	OG0000728	PF3D7_0610800	OG0002045	PVP01_1025900	PF3D7_0508100				OG0002027	PF3D7_0505100	OG0002181	PVP01_1115100	PF3D7_1356800		OG0002454	PVP01_1014200
		OG0004135	PF3D7_1363000	OG0003450	PVP01_0612400	PF3D7_1027300		OG0005005	PVP01_1335600	OG0003270	PF3D7_0611700	OG0004034	PVP01_1026000	PF3D7_0508000				OG0004025	PF3D7_0505200	OG0002175	PVP01_1116200	PF3D7_1355700		OG0002449	PVP01_1014700
		OG0000785	PF3D7_0105600	OG0002582	PVP01_1257500	PF3D7_1449500		OG0004737	PVP01_1418100	OG0000738	PF3D7_0612100	OG0002038	PVP01_1027200	PF3D7_0506800				OG0002029	PF3D7_0505400	OG0004805	PVP01_1117100	PF3D7_1354700		OG0002448	PVP01_1014800
		OG0004646	PF3D7_1228600	OG0005203	PVP01_0504900	PF3D7_0829500		OG0002967	PVP01_1421300	OG0003271	PF3D7_0612200	OG0002036	PVP01_1027500	PF3D7_0506500				OG0002031	PF3D7_0505600	OG0004112	PVP01_1117200	PF3D7_1354600		OG0000318	PVP01_1014900
		OG0001123	PF3D7_0422400	OG0002153	PVP01_1120200	PF3D7_0629300		OG0002995	PVP01_1426300	OG0003272	PF3D7_0612400	OG0002030	PVP01_1028500	PF3D7_0505500				OG0004026	PF3D7_0505700	OG0002171	PVP01_1117300	PF3D7_1354500		OG0002446	PVP01_1015300
		OG0001443	PF3D7_0911000	OG0000847	PVP01_0418100	PF3D7_0207200		OG0002999	PVP01_1426900	OG0003273	PF3D7_0612500	OG0002020	PVP01_1030200	PF3D7_0503800				OG0004028	PF3D7_0506000	OG0002170	PVP01_1117400	PF3D7_1354400		OG0002443	PVP01_1015600
		OG0004501	PF3D7_1348400	OG0001167	PVP01_1308000	PF3D7_1208900		OG0003089	PVP01_1442700	OG0000739	PF3D7_0612600	OG0002018	PVP01_1030500	PF3D7_0503400				OG0002033	PF3D7_0506100	OG0004109	PVP01_1118400	PF3D7_1353300		OG0000544	PVP01_1017300
		OG0004213	PF3D7_0321000	OG0000285	PVP01_0830000	PF3D7_0310200		OG0003171	PVP01_1458100	OG0003274	PF3D7_0612700	OG0004017	PVP01_1032700	PF3D7_0502300				OG0002034	PF3D7_0506200	OG0004107	PVP01_1119100	PF3D7_0630400		OG0002428	PVP01_1017600
		OG0000618	PF3D7_0809700	OG0004985	PVP01_1210400	PF3D7_1344400		OG0000333	PVP01_1458800	OG0003275	PF3D7_0612800	OG0004150	PVP01_1103600	PF3D7_1368400				OG0002035	PF3D7_0506300	OG0000310	PVP01_1119800	PF3D7_0629700		OG0002077	PVP01_1019400
		OG0001573	PF3D7_1146100	OG0002290	PVP01_0807800	PF3D7_1008100		OG0004698	PVP01_1462900	OG0000740	PF3D7_0612900	OG0002246	PVP01_1103800	PF3D7_1368200				OG0004029	PF3D7_0506400	OG0002153	PVP01_1120200	PF3D7_0629300		OG0002072	PVP01_1020400
		OG0004636	PF3D7_1225400	OG0002820	PVP01_1210500	PF3D7_1344300		OG0005127	PVP01_1463300	OG0000282	PF3D7_0613300	OG0002237	PVP01_1105100	PF3D7_1366900				OG0002037	PF3D7_0506700	OG0002152	PVP01_1120300	PF3D7_0629200		OG0002070	PVP01_1020600
		OG0003987	PF3D7_1411200	OG0001076	PVP01_0615300	PF3D7_1030200		OG0003206	PVP01_1464500	OG0000741	PF3D7_0613400	OG0002232	PVP01_1105900	PF3D7_1366100				OG0000506	PF3D7_0506900	OG0002148	PVP01_1121300	PF3D7_0628200		OG0002064	PVP01_1021700
		OG0001022	PF3D7_1019800	OG0002993	PVP01_1425900	PF3D7_0814400		OG0000268	PVP01_1465300	OG0003277	PF3D7_0613600	OG0000526	PVP01_1106200	PF3D7_1365800				OG0002039	PF3D7_0507000	OG0002147	PVP01_1121400	PF3D7_0628100		OG0002061	PVP01_1022000
		OG0004030	PF3D7_0507200	OG0002136	PVP01_1123100	PF3D7_0626400		OG0001385	PVP01_0103300	OG0000744	PF3D7_0614100	OG0002231	PVP01_1106300	PF3D7_1365700				OG0002040	PF3D7_0507100	OG0000309	PVP01_1121700	PF3D7_0627800		OG0004047	PVP01_1022200
		OG0001762	PF3D7_1110900	OG0003998	PVP01_1341300	PF3D7_1407400		OG0004815	PVP01_0113700	OG0000746	PF3D7_0614300	OG0002217	PVP01_1108200	PF3D7_1363800				OG0004030	PF3D7_0507200	OG0002145	PVP01_1121800	PF3D7_0627700		OG0004045	PVP01_1022500
		OG0001375	PF3D7_0418600	OG0001098	PVP01_0619000	PF3D7_1033900		OG0000767	PVP01_0206100	OG0002413	PF3D7_0614500	OG0002211	PVP01_1109600	PF3D7_1362400				OG0004031	PF3D7_0507300	OG0002142	PVP01_1122200	PF3D7_0627300		OG0002059	PVP01_1022700
		OG0002723	PF3D7_1323100	OG0001392	PVP01_0105700	PF3D7_0705500		OG0001243	PVP01_0318600	OG0004248	PF3D7_0614600	OG0002205	PVP01_1110200	PF3D7_1361800				OG0004032	PF3D7_0507400	OG0002136	PVP01_1123100	PF3D7_0626400		OG0002056	PVP01_1023500
		OG0004797	PF3D7_1426600	OG0002449	PVP01_1014700	PF3D7_0519200		OG0000875	PVP01_0411200	OG0002414	PF3D7_0614700	OG0004128	PVP01_1110800	PF3D7_1361200				OG0002041	PF3D7_0507500	OG0004089	PVP01_1124700	PF3D7_0624800		OG0004041	PVP01_1023900
		OG0000877	PF3D7_0214100	OG0001473	PVP01_0715100	PF3D7_0916700		OG0000859	PVP01_0414900	OG0002415	PF3D7_0614800	OG0002203	PVP01_1110900	PF3D7_1361100				OG0002042	PF3D7_0507600	OG0002131	PVP01_1124900	PF3D7_0624600		OG0004040	PVP01_1024000
		OG0002777	PF3D7_1336400	OG0003408	PVP01_0703500	PF3D7_0905100		OG0001299	PVP01_0510900	OG0002416	PF3D7_0614900	OG0002201	PVP01_1111200	PF3D7_1360800				OG0002043	PF3D7_0507700	OG0002120	PVP01_1126400	PF3D7_0623100		OG0004035	PVP01_1024700
		OG0004966	PF3D7_0906700	OG0001233	PVP01_0317000	PF3D7_0721300		OG0001301	PVP01_0511300	OG0002419	PF3D7_0615300	OG0004125	PVP01_1112000	PF3D7_1359900				OG0002044	PF3D7_0507800	OG0002100	PVP01_1129800	PF3D7_0619700		OG0002049	PVP01_1025000
		OG0001201	PF3D7_0716100	OG0002901	PVP01_1411700	PF3D7_1310700		OG0001379	PVP01_0528700	OG0002420	PF3D7_0615500	OG0004123	PVP01_1112400	PF3D7_1359500				OG0000306	PF3D7_0508500	OG0002092	PVP01_1131800	PF3D7_0617300		OG0002045	PVP01_1025900
		OG0002668	PF3D7_1465900	OG0000406	PVP01_1304900	PF3D7_1205800		OG0002285	PVP01_0807100	OG0002421	PF3D7_0615600	OG0000524	PVP01_1112500	PF3D7_1359400				OG0000508	PF3D7_0508600	OG0002091	PVP01_1131900	PF3D7_0617200		OG0004034	PVP01_1026000
		OG0002467	PF3D7_0522500	OG0000283	PVP01_0214400	PF3D7_0728700		OG0004187	PVP01_0813400	OG0002423	PF3D7_0615800	OG0002181	PVP01_1115100	PF3D7_1356800				OG0000509	PF3D7_0508700	OG0004064	PVP01_1132600	PF3D7_0616500		OG0004033	PVP01_1026100
		OG0002660	PF3D7_1463900	OG0002320	PVP01_0813500	PF3D7_1013400		OG0002329	PVP01_0815200	OG0004250	PF3D7_0615900	OG0002175	PVP01_1116200	PF3D7_1355700				OG0005221	PF3D7_0508900	OG0004063	PVP01_1132700	PF3D7_0616400		OG0002032	PVP01_1028200
		OG0000859	PF3D7_0210000	OG0002962	PVP01_1420800	PF3D7_1320000		OG0000947	PVP01_0832000	OG0002087	PF3D7_0616600	OG0004805	PVP01_1117100	PF3D7_1354700				OG0002050	PF3D7_0509100	OG0002086	PVP01_1132900	PF3D7_0616200		OG0002030	PVP01_1028500
		OG0001016	PF3D7_1018300	OG0004196	PVP01_0816100	PF3D7_1016000		OG0003863	PVP01_0909900	OG0002090	PF3D7_0617100	OG0004112	PVP01_1117200	PF3D7_1354600				OG0002051	PF3D7_0509200	OG0000745	PVP01_1134900	PF3D7_0614200		OG0000504	PVP01_1029900
		OG0001827	PF3D7_0409000	OG0002756	PVP01_1223600	PF3D7_1331000		OG0003786	PVP01_0938700	OG0002094	PF3D7_0618000	OG0002171	PVP01_1117300	PF3D7_1354500				OG0002052	PF3D7_0509400	OG0003278	PVP01_1135200	PF3D7_0613900		OG0004022	PVP01_1030300
		OG0004465	PF3D7_1337500	OG0001638	PVP01_0932800	PF3D7_1132000		OG0001584	PVP01_0944700	OG0002096	PF3D7_0618300	OG0002170	PVP01_1117400	PF3D7_1354400				OG0004036	PF3D7_0509500	OG0000743	PVP01_1135400	PF3D7_0613700		OG0002018	PVP01_1030500
		OG0001142	PF3D7_1203600	OG0003712	PVP01_0723600	PF3D7_0925100		OG0002492	PVP01_1006500	OG0002099	PF3D7_0618700	OG0004109	PVP01_1118400	PF3D7_1353300				OG0004037	PF3D7_0509600	OG0003276	PVP01_1136000	PF3D7_0613100		OG0004017	PVP01_1032700
		OG0001307	PF3D7_0822100	OG0004017	PVP01_1032700	PF3D7_0502300		OG0002475	PVP01_1009500	OG0004070	PF3D7_0619200	OG0004107	PVP01_1119100	PF3D7_0630400				OG0000235	PF3D7_0509800	OG0003269	PVP01_1137600	PF3D7_0611600		OG0002250	PVP01_1103100
		OG0000234	PF3D7_1404600	OG0003551	PVP01_0319800	PF3D7_0724100		OG0002057	PVP01_1023000	OG0004071	PF3D7_0619300	OG0000310	PVP01_1119800	PF3D7_0629700				OG0002054	PF3D7_0510300	OG0000729	PVP01_1138300	PF3D7_0610900		OG0002247	PVP01_1103500
		OG0001586	PF3D7_1143800	OG0000359	PVP01_0204500	PF3D7_0110600		OG0002178	PVP01_1115600	OG0004074	PF3D7_0619800	OG0002153	PVP01_1120200	PF3D7_0629300				OG0002058	PF3D7_0511200	OG0000720	PVP01_1139500	PF3D7_0609400		OG0004150	PVP01_1103600
		OG0004887	PF3D7_1204900	OG0002283	PVP01_0806900	PF3D7_1007200		OG0000577	PVP01_1238100	OG0004076	PF3D7_0620300	OG0002152	PVP01_1120300	PF3D7_0629200				OG0004046	PF3D7_0511600	OG0000712	PVP01_1141400	PF3D7_0607600		OG0002246	PVP01_1103800
		OG0003627	PF3D7_0704300	OG0002045	PVP01_1025900	PF3D7_0508100		OG0004393	PVP01_1239700	OG0004078	PF3D7_0620500	OG0002151	PVP01_1120400	PF3D7_0629100				OG0002062	PF3D7_0512100	OG0003257	PVP01_1142900	PF3D7_0606000		OG0002237	PVP01_1105100
		OG0000879	PF3D7_0214400	OG0003626	PVP01_0104300	PF3D7_0704100		OG0002617	PVP01_1251100	OG0004079	PF3D7_0620600	OG0000516	PVP01_1121200	PF3D7_0628300				OG0004049	PF3D7_0512400	OG0000690	PVP01_1144400	PF3D7_0604500		OG0002234	PVP01_1105500
		OG0000751	PF3D7_0111400	OG0000811	PVP01_0214300	PF3D7_0728600		OG0002613	PVP01_1251700	OG0004080	PF3D7_0621000	OG0002148	PVP01_1121300	PF3D7_0628200				OG0002065	PF3D7_0512600	OG0000679	PVP01_1145900	PF3D7_0603000		OG0002232	PVP01_1105900
		OG0004387	PF3D7_1465400	OG0001692	PVP01_0923600	PF3D7_1123000		OG0004337	PVP01_1256000	OG0002109	PF3D7_0621700	OG0002147	PVP01_1121400	PF3D7_0628100				OG0002069	PF3D7_0513200	OG0002856	PVP01_1202300	PF3D7_1352500		OG0000526	PVP01_1106200
		OG0003951	PF3D7_1422600	OG0001944	PVP01_1334400	PF3D7_1414500		OG0002563	PVP01_1260200	OG0002111	PF3D7_0621900	OG0000309	PVP01_1121700	PF3D7_0627800				OG0002073	PF3D7_0513600	OG0004517	PVP01_1202400	PF3D7_1352400		OG0002231	PVP01_1106300
		OG0002054	PF3D7_0510300	OG0003594	PVP01_0520900	PF3D7_0414400		OG0004919	PVP01_1305200	OG0004083	PF3D7_0622100	OG0002145	PVP01_1121800	PF3D7_0627700				OG0002074	PF3D7_0513800	OG0002854	PVP01_1202900	PF3D7_1351900		OG0002217	PVP01_1108200
		OG0003806	PF3D7_1131700	OG0000267	PVP01_1463500	PF3D7_1246400		OG0000408	PVP01_1307500	OG0002112	PF3D7_0622200	OG0002142	PVP01_1122200	PF3D7_0627300				OG0002075	PF3D7_0513900	OG0002851	PVP01_1203300	PF3D7_1351400		OG0002211	PVP01_1109600
		OG0003983	PF3D7_1412100	OG0000502	PVP01_1347000	PF3D7_1401800		OG0003514	PVP01_1309500	OG0002113	PF3D7_0622300	OG0002141	PVP01_1122400	PF3D7_0627100				OG0002076	PF3D7_0514100	OG0000601	PVP01_1203900	PF3D7_1350900		OG0002205	PVP01_1110200
		OG0004076	PF3D7_0620300	OG0004022	PVP01_1030300	PF3D7_0503600		OG0000290	PVP01_1311200	OG0004084	PF3D7_0622700	OG0002137	PVP01_1123000	PF3D7_0626500				OG0004054	PF3D7_0514200	OG0002841	PVP01_1205300	PF3D7_1349500		OG0002204	PVP01_1110300
		OG0001432	PF3D7_0909700	OG0004204	PVP01_0817600	PF3D7_0322600		OG0002001	PVP01_1346400	OG0002117	PF3D7_0622800	OG0002136	PVP01_1123100	PF3D7_0626400				OG0004058	PF3D7_0514900	OG0004502	PVP01_1206200	PF3D7_1348600		OG0004128	PVP01_1110800
		OG0001198	PF3D7_0412000	OG0000364	PVP01_0210400	PF3D7_0104300		OG0002961	PVP01_1420400	OG0002119	PF3D7_0623000	OG0004089	PVP01_1124700	PF3D7_0624800				OG0002079	PF3D7_0515000	OG0002835	PVP01_1206600	PF3D7_1348200		OG0002202	PVP01_1111000
		OG0003146	PF3D7_1235900	OG0003323	PVP01_0418200	PF3D7_0207100		OG0002996	PVP01_1426400	OG0000515	PF3D7_0623400	OG0004088	PVP01_1124800	PF3D7_0624700				OG0004059	PF3D7_0515100	OG0004498	PVP01_1207300	PF3D7_1347500		OG0002201	PVP01_1111200
		OG0001207	PF3D7_0717400	OG0002265	PVP01_0804000	PF3D7_1004300		OG0004594	PVP01_1429600	OG0002123	PF3D7_0623700	OG0002131	PVP01_1124900	PF3D7_0624600				OG0000512	PF3D7_0515200	OG0004985	PVP01_1210400	PF3D7_1344400		OG0004123	PVP01_1112400
		OG0001213	PF3D7_0718400	OG0001366	PVP01_0526600	PF3D7_0417200		OG0003038	PVP01_1433500	OG0004087	PF3D7_0623800	OG0002120	PVP01_1126400	PF3D7_0623100				OG0002080	PF3D7_0515300	OG0002820	PVP01_1210500	PF3D7_1344300		OG0000524	PVP01_1112500
		OG0001987	PF3D7_1405600	OG0001707	PVP01_0921600	PF3D7_1121000		OG0003058	PVP01_1437300	OG0002124	PF3D7_0623900	OG0002118	PVP01_1126600	PF3D7_0622900				OG0002081	PF3D7_0515400	OG0004732	PVP01_1210700	PF3D7_1344100		OG0002195	PVP01_1112700
		OG0002894	PF3D7_1309400	OG0000300	PVP01_1315100	PF3D7_1434400		OG0003069	PVP01_1439200	OG0002126	PF3D7_0624100	OG0002100	PVP01_1129800	PF3D7_0619700				OG0002083	PF3D7_0515700	OG0004483	PVP01_1211500	PF3D7_1343300		OG0002181	PVP01_1115100
		OG0003516	PF3D7_1210600	OG0004613	PVP01_1435500	PF3D7_1216700				OG0002127	PF3D7_0624200	OG0002092	PVP01_1131800	PF3D7_0617300				OG0002425	PF3D7_0516000	OG0004482	PVP01_1211700	PF3D7_1343100		OG0002175	PVP01_1116200
		OG0004325	PF3D7_1444900	OG0003661	PVP01_0708100	PF3D7_0909600				OG0002129	PF3D7_0624400	OG0002091	PVP01_1131900	PF3D7_0617200				OG0002429	PF3D7_0516500	OG0004481	PVP01_1211900	PF3D7_1342900		OG0002172	PVP01_1116800
		OG0004352	PF3D7_1455300	OG0002201	PVP01_1111200	PF3D7_1360800				OG0002130	PF3D7_0624500	OG0004064	PVP01_1132600	PF3D7_0616500				OG0004251	PF3D7_0516600	OG0000185	PVP01_1212200	PF3D7_1342600		OG0004805	PVP01_1117100
		OG0002020	PF3D7_0503800	OG0000372	PVP01_0418900	PF3D7_0206200				OG0002132	PF3D7_0625300	OG0004063	PVP01_1132700	PF3D7_0616400				OG0002430	PF3D7_0516800	OG0004480	PVP01_1212300	PF3D7_1342500		OG0002170	PVP01_1117400
		OG0003047	PF3D7_1216000	OG0002310	PVP01_0811900	PF3D7_1011800				OG0004092	PF3D7_0625400	OG0002086	PVP01_1132900	PF3D7_0616200				OG0002431	PF3D7_0516900	OG0002808	PVP01_1212700	PF3D7_1342100		OG0002165	PVP01_1118100
		OG0004134	PF3D7_1362900	OG0002131	PVP01_1124900	PF3D7_0624600				OG0004093	PF3D7_0625500	OG0004061	PVP01_1133000	PF3D7_0616100				OG0002432	PF3D7_0517000	OG0002807	PVP01_1212800	PF3D7_1342000		OG0004109	PVP01_1118400
		OG0002113	PF3D7_0622300	OG0003884	PVP01_0303300	PF3D7_0404000				OG0002133	PF3D7_0625600	OG0000745	PVP01_1134900	PF3D7_0614200				OG0002433	PF3D7_0517100	OG0002802	PVP01_1213400	PF3D7_1341300		OG0004107	PVP01_1119100
		OG0003563	PF3D7_0824900	OG0004481	PVP01_1211900	PF3D7_1342900				OG0004095	PF3D7_0626000	OG0003278	PVP01_1135200	PF3D7_0613900				OG0002434	PF3D7_0517300	OG0002800	PVP01_1213900	PF3D7_1340900		OG0000310	PVP01_1119800
		OG0003358	PF3D7_0217200	OG0003029	PVP01_1431700	PF3D7_1212800				OG0000308	PF3D7_0626100	OG0000743	PVP01_1135400	PF3D7_0613700				OG0002436	PF3D7_0517500	OG0004474	PVP01_1214500	PF3D7_1340300		OG0004105	PVP01_1119900
		OG0004009	PF3D7_1403800	OG0001038	PVP01_0607700	PF3D7_1022500				OG0002135	PF3D7_0626300	OG0003276	PVP01_1136000	PF3D7_0613100				OG0002437	PF3D7_0517600	OG0004471	PVP01_1215100	PF3D7_1339700		OG0002152	PVP01_1120300
		OG0003637	PF3D7_0707200	OG0001323	PVP01_0514700	PF3D7_0819600				OG0004097	PF3D7_0626600	OG0000729	PVP01_1138300	PF3D7_0610900				OG0004253	PF3D7_0518100	OG0004467	PVP01_1216200	PF3D7_1338500		OG0000516	PVP01_1121200
		OG0000461	PF3D7_1136200	OG0001072	PVP01_0614500	PF3D7_1029400				OG0004098	PF3D7_0627000	OG0000720	PVP01_1139500	PF3D7_0609400				OG0002445	PF3D7_0518500	OG0004463	PVP01_1218300	PF3D7_1336300		OG0002148	PVP01_1121300
		OG0001866	PF3D7_1431700	OG0002147	PVP01_1121400	PF3D7_0628100				OG0002154	PF3D7_0629400	OG0003257	PVP01_1142900	PF3D7_0606000				OG0004893	PF3D7_0518700	OG0002776	PVP01_1218400	PF3D7_1336200		OG0000309	PVP01_1121700
		OG0001630	PF3D7_1133500	OG0004987	PVP01_1221600	PF3D7_1333100				OG0004106	PF3D7_0629900	OG0003253	PVP01_1143800	PF3D7_0605100				OG0000545	PF3D7_0518800	OG0004462	PVP01_1218600	PF3D7_1336000		OG0002145	PVP01_1121800
		OG0001248	PF3D7_0723700	OG0003197	PVP01_1462800	PF3D7_1245800				OG0002158	PF3D7_0630100	OG0000690	PVP01_1144400	PF3D7_0604500				OG0002447	PF3D7_0518900	OG0000592	PVP01_1218700	PF3D7_1335900		OG0002139	PVP01_1122700
		OG0001150	PF3D7_1205500	OG0001826	PVP01_0307800	PF3D7_0408500				OG0002160	PF3D7_0630300	OG0000679	PVP01_1145900	PF3D7_0603000				OG0002450	PF3D7_0519300	OG0004460	PVP01_1218900	PF3D7_1335700		OG0002136	PVP01_1123100
		OG0001417	PF3D7_0317600	OG0004778	PVP01_0317700	PF3D7_0722000				OG0004108	PF3D7_0630700	OG0002856	PVP01_1202300	PF3D7_1352500				OG0000546	PF3D7_0519800	OG0004454	PVP01_1221500	PF3D7_1333200		OG0004089	PVP01_1124700
		OG0001028	PF3D7_1020500	OG0003504	PVP01_1306100	PF3D7_1207000				OG0000517	PF3D7_0630900	OG0004517	PVP01_1202400	PF3D7_1352400				OG0004975	PF3D7_0520500	OG0004987	PVP01_1221600	PF3D7_1333100		OG0004088	PVP01_1124800
		OG0000330	PF3D7_1321400	OG0004416	PVP01_1232200	PF3D7_1322400				OG0003620	PF3D7_0703400	OG0004515	PVP01_1202800	PF3D7_1352000				OG0002458	PF3D7_0520600	OG0002756	PVP01_1223600	PF3D7_1331000		OG0002125	PVP01_1125500
		OG0002052	PF3D7_0509400	OG0002835	PVP01_1206600	PF3D7_1348200				OG0001386	PF3D7_0703500	OG0002854	PVP01_1202900	PF3D7_1351900				OG0002459	PF3D7_0520700	OG0004444	PVP01_1224800	PF3D7_1329700		OG0002120	PVP01_1126400
		OG0003868	PF3D7_1106800	OG0004004	PVP01_1343900	PF3D7_1404900				OG0003624	PF3D7_0703900	OG0002851	PVP01_1203300	PF3D7_1351400				OG0004256	PF3D7_0520800	OG0002752	PVP01_1224900	PF3D7_1329600		OG0002118	PVP01_1126600
		OG0001487	PF3D7_0919300	OG0000369	PVP01_0216000	PF3D7_0730300				OG0003625	PF3D7_0704000	OG0000601	PVP01_1203900	PF3D7_1350900				OG0004914	PF3D7_0521000	OG0002751	PVP01_1225100	PF3D7_1329400		OG0004077	PVP01_1129100
		OG0005117	PF3D7_1467000	OG0003970	PVP01_1331700	PF3D7_1417200				OG0003627	PF3D7_0704300	OG0002841	PVP01_1205300	PF3D7_1349500				OG0002461	PF3D7_0521200	OG0004439	PVP01_1226000	PF3D7_1328400		OG0004075	PVP01_1129300
		OG0001330	PF3D7_0817700	OG0000481	PVP01_0905000	PF3D7_1104200				OG0003630	PF3D7_0704800	OG0004504	PVP01_1205900	PF3D7_1348900				OG0000549	PF3D7_0521700	OG0002742	PVP01_1226900	PF3D7_1327500		OG0002100	PVP01_1129800
		OG0001899	PF3D7_1424400	OG0003605	PVP01_0526500	PF3D7_0417100				OG0001389	PF3D7_0705000	OG0004502	PVP01_1206200	PF3D7_1348600				OG0004258	PF3D7_0521900	OG0004437	PVP01_1227000	PF3D7_1327400		OG0000514	PVP01_1130500
		OG0000562	PF3D7_1445200	OG0000403	PVP01_0529800	PF3D7_0420300				OG0003632	PF3D7_0705100	OG0002835	PVP01_1206600	PF3D7_1348200				OG0002468	PF3D7_0522600	OG0004436	PVP01_1227100	PF3D7_1327300		OG0002092	PVP01_1131800
		OG0001306	PF3D7_0822200	OG0002991	PVP01_1425700	PF3D7_0814600				OG0003634	PF3D7_0705700	OG0004498	PVP01_1207300	PF3D7_1347500				OG0004263	PF3D7_0523200	OG0002741	PVP01_1227700	PF3D7_1326700		OG0004063	PVP01_1132700
		OG0003738	PF3D7_0932000	OG0000770	PVP01_0206700	PF3D7_0108300				OG0001398	PF3D7_0706700	OG0004985	PVP01_1210400	PF3D7_1344400				OG0004266	PF3D7_0523700	OG0004427	PVP01_1228500	PF3D7_1326000		OG0002086	PVP01_1132900
		OG0001153	PF3D7_1206200	OG0003501	PVP01_1305400	PF3D7_1206300				OG0003637	PF3D7_0707200	OG0002820	PVP01_1210500	PF3D7_1344300				OG0000551	PF3D7_0524000	OG0002731	PVP01_1230400	PF3D7_1324200		OG0004061	PVP01_1133000
		OG0003503	PF3D7_1206900	OG0004922	PVP01_1456100	PF3D7_1238000				OG0003638	PF3D7_0707300	OG0004732	PVP01_1210700	PF3D7_1344100				OG0004267	PF3D7_0524100	OG0002727	PVP01_1231100	PF3D7_1323500		OG0000745	PVP01_1134900
		OG0004476	PF3D7_1340500	OG0000363	PVP01_0207300	PF3D7_0107600				OG0001399	PF3D7_0707400	OG0004483	PVP01_1211500	PF3D7_1343300				OG0002479	PF3D7_0525100	OG0004416	PVP01_1232200	PF3D7_1322400		OG0003278	PVP01_1135200
		OG0001908	PF3D7_1422200	OG0001694	PVP01_0923400	PF3D7_1122800				OG0003640	PF3D7_0707800	OG0004482	PVP01_1211700	PF3D7_1343100				OG0002481	PF3D7_0525300	OG0002718	PVP01_1232300	PF3D7_1322300		OG0003276	PVP01_1136000
		OG0000776	PF3D7_0107100	OG0003452	PVP01_0613600	PF3D7_1028500				OG0001403	PF3D7_0708000	OG0004481	PVP01_1211900	PF3D7_1342900				OG0002482	PF3D7_0525400	OG0004918	PVP01_1232500	PF3D7_1322100		OG0005341	PVP01_1137400
		OG0001421	PF3D7_0907200	OG0001220	PVP01_0315200	PF3D7_0719500				OG0003642	PF3D7_0708200	OG0000185	PVP01_1212200	PF3D7_1342600				OG0002483	PF3D7_0525500	OG0002716	PVP01_1232600	PF3D7_1322000		OG0003269	PVP01_1137600
		OG0001703	PF3D7_1121400	OG0003917	PVP01_1314200	PF3D7_1435300				OG0002359	PF3D7_0708900	OG0004480	PVP01_1212300	PF3D7_1342500				OG0004273	PF3D7_0525700	OG0002715	PVP01_1232700	PF3D7_1321900		OG0000729	PVP01_1138300
		OG0000293	PF3D7_0829400	OG0003360	PVP01_0407400	PF3D7_0217600				OG0002362	PF3D7_0709300	OG0002808	PVP01_1212700	PF3D7_1342100				OG0004275	PF3D7_0525900	OG0002713	PVP01_1232900	PF3D7_1321700		OG0000720	PVP01_1139500
		OG0000368	PF3D7_0727300	OG0003585	PVP01_0517200	PF3D7_0818100				OG0004221	PF3D7_0709800	OG0002807	PVP01_1212800	PF3D7_1342000				OG0004276	PF3D7_0526000	OG0002709	PVP01_1233600	PF3D7_1473200		OG0000280	PVP01_1139800
		OG0003138	PF3D7_1234300	OG0001367	PVP01_0526700	PF3D7_0417300				OG0002365	PF3D7_0710100	OG0002802	PVP01_1213400	PF3D7_1341300				OG0002485	PF3D7_0526300	OG0002699	PVP01_1235600	PF3D7_1471200		OG0000712	PVP01_1141400
		OG0001266	PF3D7_0828500	OG0004610	PVP01_1435200	PF3D7_1216400				OG0002368	PF3D7_0710600	OG0002800	PVP01_1213900	PF3D7_1340900				OG0000553	PF3D7_0526500	OG0004401	PVP01_1236500	PF3D7_1470300		OG0000708	PVP01_1141800
		OG0003079	PF3D7_1223200	OG0002958	PVP01_1420000	PF3D7_1319100				OG0004227	PF3D7_0711300	OG0004474	PVP01_1214500	PF3D7_1340300				OG0002488	PF3D7_0526900	OG0004400	PVP01_1236600	PF3D7_1470200		OG0000702	PVP01_1142400
		OG0000964	PF3D7_0311400	OG0002637	PVP01_1247100	PF3D7_1459800				OG0004574	PF3D7_0713500	OG0004471	PVP01_1215100	PF3D7_1339700				OG0002489	PF3D7_0527000	OG0002692	PVP01_1237000	PF3D7_1469800		OG0003257	PVP01_1142900
		OG0000531	PF3D7_1008700	OG0004588	PVP01_1427900	PF3D7_0812300				OG0004575	PF3D7_0713900	OG0004467	PVP01_1216200	PF3D7_1338500				OG0002491	PF3D7_0527200	OG0004398	PVP01_1237300	PF3D7_1469500		OG0003253	PVP01_1143800
		OG0000384	PF3D7_0314100	OG0004274	PVP01_1008000	PF3D7_0525800				OG0002978	PF3D7_0714300	OG0000593	PVP01_1217900	PF3D7_1336800				OG0004279	PF3D7_0527400	OG0002685	PVP01_1238400	PF3D7_1468400		OG0000684	PVP01_1145300
		OG0005115	PF3D7_1322600	OG0000543	PVP01_0118100	PF3D7_0802100				OG0002980	PF3D7_0714600	OG0004463	PVP01_1218300	PF3D7_1336300				OG0004280	PF3D7_0527600	OG0002683	PVP01_1238700	PF3D7_1468100		OG0000679	PVP01_1145900
		OG0001318	PF3D7_0820500	OG0004790	PVP01_0927000	PF3D7_1126300				OG0001203	PF3D7_0716600	OG0004462	PVP01_1218600	PF3D7_1336000				OG0004281	PF3D7_0528500	OG0004396	PVP01_1238800	PF3D7_1468000		OG0000676	PVP01_1146700
		OG0002720	PF3D7_1322800	OG0001077	PVP01_0615400	PF3D7_1030300				OG0003534	PF3D7_0716700	OG0000592	PVP01_1218700	PF3D7_1335900				OG0004282	PF3D7_0528600	OG0002682	PVP01_1238900	PF3D7_1467900		OG0002856	PVP01_1202300
		OG0001634	PF3D7_1132600	OG0000309	PVP01_1121700	PF3D7_0627800				OG0001204	PF3D7_0716800	OG0004460	PVP01_1218900	PF3D7_1335700				OG0002499	PF3D7_0529000	OG0004394	PVP01_1239200	PF3D7_1467600		OG0004517	PVP01_1202400
		OG0001184	PF3D7_1211700	OG0000420	PVP01_0516700	PF3D7_0818600				OG0003535	PF3D7_0717000	OG0004458	PVP01_1220700	PF3D7_1334000				OG0002501	PF3D7_0529300	OG0002671	PVP01_1240500	PF3D7_1466300		OG0002854	PVP01_1202900
		OG0004899	PF3D7_0206900	OG0003419	PVP01_0603900	PF3D7_1018700				OG0001207	PF3D7_0717400	OG0004457	PVP01_1220800	PF3D7_1333900				OG0004285	PF3D7_0529800	OG0002663	PVP01_1242100	PF3D7_1464700		OG0002853	PVP01_1203000
		OG0003477	PF3D7_0420600	OG0003922	PVP01_1316100	PF3D7_1433400				OG0003537	PF3D7_0717600	OG0004454	PVP01_1221500	PF3D7_1333200				OG0002506	PF3D7_0530100	OG0004384	PVP01_1242200	PF3D7_1464600		OG0002851	PVP01_1203300
		OG0004188	PF3D7_1013600	OG0002142	PVP01_1122200	PF3D7_0627300				OG0001209	PF3D7_0717700	OG0004987	PVP01_1221600	PF3D7_1333100				OG0000356	PF3D7_0602400	OG0002656	PVP01_1244000	PF3D7_1462800		OG0000601	PVP01_1203900
		OG0001347	PF3D7_0413600	OG0000613	PVP01_1413800	PF3D7_1312900				OG0003538	PF3D7_0717800	OG0004452	PVP01_1223100	PF3D7_1331500				OG0000678	PF3D7_0602800	OG0000574	PVP01_1244500	PF3D7_1462300		OG0004504	PVP01_1205900
		OG0000519	PF3D7_1354800	OG0001928	PVP01_1331900	PF3D7_1417000				OG0001210	PF3D7_0717900	OG0002756	PVP01_1223600	PF3D7_1331000				OG0003248	PF3D7_0602900	OG0002652	PVP01_1245200	PF3D7_1461600		OG0004502	PVP01_1206200
		OG0003824	PF3D7_1126500	OG0004228	PVP01_0112200	PF3D7_0808200				OG0003539	PF3D7_0718000	OG0004444	PVP01_1224800	PF3D7_1329700				OG0000682	PF3D7_0603400	OG0002650	PVP01_1245500	PF3D7_1461300		OG0002835	PVP01_1206600
		OG0000855	PF3D7_0209300	OG0001902	PVP01_1325700	PF3D7_1423300				OG0001211	PF3D7_0718100	OG0002752	PVP01_1224900	PF3D7_1329600				OG0000686	PF3D7_0603800	OG0002642	PVP01_1246500	PF3D7_1460300		OG0004498	PVP01_1207300
		OG0002722	PF3D7_1323000	OG0003668	PVP01_0710400	PF3D7_0911900				OG0001212	PF3D7_0718300	OG0002751	PVP01_1225100	PF3D7_1329400				OG0003250	PF3D7_0604000	OG0002637	PVP01_1247100	PF3D7_1459800		OG0004493	PVP01_1208500
		OG0002664	PF3D7_1465000	OG0000485	PVP01_0308400	PF3D7_0409100				OG0001213	PF3D7_0718400	OG0004439	PVP01_1226000	PF3D7_1328400				OG0003251	PF3D7_0604100	OG0004365	PVP01_1248900	PF3D7_1458000		OG0002812	PVP01_1211400
		OG0000590	PF3D7_1332400	OG0003414	PVP01_0602700	PF3D7_1017500				OG0001215	PF3D7_0718600	OG0002742	PVP01_1226900	PF3D7_1327500				OG0004982	PF3D7_0604600	OG0004361	PVP01_1249300	PF3D7_1457600		OG0004483	PVP01_1211500
		OG0004678	PF3D7_1237700	OG0002308	PVP01_0811600	PF3D7_1011500				OG0001218	PF3D7_0719100	OG0004437	PVP01_1227000	PF3D7_1327400				OG0000693	PF3D7_0604900	OG0004353	PVP01_1251200	PF3D7_1455700		OG0004482	PVP01_1211700
		OG0003620	PF3D7_0703400	OG0000537	PVP01_0814700	PF3D7_1014600				OG0001219	PF3D7_0719300	OG0004436	PVP01_1227100	PF3D7_1327300				OG0000695	PF3D7_0605200	OG0002608	PVP01_1253300	PF3D7_1453700		OG0004986	PVP01_1211800
		OG0002440	PF3D7_0517900	OG0003430	PVP01_0607000	PF3D7_1021800				OG0003541	PF3D7_0719400	OG0002741	PVP01_1227700	PF3D7_1326700				OG0003255	PF3D7_0605600	OG0002598	PVP01_1255300	PF3D7_1451700		OG0004481	PVP01_1211900
		OG0002860	PF3D7_1302600	OG0000832	PVP01_0421000	PF3D7_0204100				OG0001221	PF3D7_0719600	OG0004427	PVP01_1228500	PF3D7_1326000				OG0003256	PF3D7_0605700	OG0002591	PVP01_1256300	PF3D7_1450700		OG0000185	PVP01_1212200
		OG0004601	PF3D7_1213500	OG0000647	PVP01_1464000	PF3D7_1246900				OG0001223	PF3D7_0719800	OG0004420	PVP01_1230300	PF3D7_1324300				OG0000698	PF3D7_0605800	OG0002587	PVP01_1256900	PF3D7_1450100		OG0004480	PVP01_1212300
		OG0003740	PF3D7_0933100	OG0000310	PVP01_1119800	PF3D7_0629700				OG0001224	PF3D7_0719900	OG0002731	PVP01_1230400	PF3D7_1324200				OG0000700	PF3D7_0606100	OG0002579	PVP01_1257900	PF3D7_1449100		OG0002808	PVP01_1212700
		OG0001515	PF3D7_0924500	OG0003506	PVP01_1306500	PF3D7_1207400				OG0003543	PF3D7_0720700	OG0002727	PVP01_1231100	PF3D7_1323500				OG0000703	PF3D7_0606600	OG0004334	PVP01_1258000	PF3D7_1449000		OG0002802	PVP01_1213400
		OG0004533	PF3D7_1307500	OG0001926	PVP01_1331300	PF3D7_1417600				OG0001229	PF3D7_0720800	OG0002719	PVP01_1232100	PF3D7_1322500				OG0000704	PF3D7_0606700	OG0002578	PVP01_1258100	PF3D7_1448900		OG0002799	PVP01_1214000
		OG0001621	PF3D7_1135100	OG0004617	PVP01_1436800	PF3D7_1218000				OG0001230	PF3D7_0720900	OG0004416	PVP01_1232200	PF3D7_1322400				OG0000705	PF3D7_0606900	OG0004331	PVP01_1259200	PF3D7_1447800		OG0004474	PVP01_1214500
		OG0000741	PF3D7_0613400	OG0004089	PVP01_1124700	PF3D7_0624800				OG0003544	PF3D7_0721000	OG0002718	PVP01_1232300	PF3D7_1322300				OG0000706	PF3D7_0607000	OG0004329	PVP01_1259900	PF3D7_1447100		OG0004471	PVP01_1215100
		OG0002037	PF3D7_0506700	OG0003324	PVP01_0418000	PF3D7_0207300				OG0001232	PF3D7_0721200	OG0004918	PVP01_1232500	PF3D7_1322100				OG0000710	PF3D7_0607400	OG0002564	PVP01_1260100	PF3D7_1446900		OG0004470	PVP01_1215200
		OG0003665	PF3D7_0911400	OG0001812	PVP01_0305100	PF3D7_0405700				OG0001238	PF3D7_0722300	OG0002716	PVP01_1232600	PF3D7_1322000				OG0000713	PF3D7_0607700	OG0004328	PVP01_1260300	PF3D7_1446700		OG0004467	PVP01_1216200
		OG0003289	PF3D7_0105800	OG0002400	PVP01_0117400	PF3D7_0802800				OG0000412	PF3D7_0722400	OG0002713	PVP01_1232900	PF3D7_1321700				OG0000714	PF3D7_0608000	OG0002557	PVP01_1261400	PF3D7_1445600		OG0000594	PVP01_1217800
		OG0003611	PF3D7_0418800	OG0000411	PVP01_0316100	PF3D7_0720400				OG0001239	PF3D7_0722500	OG0002712	PVP01_1233000	PF3D7_1473900				OG0003261	PF3D7_0608100	OG0000261	PVP01_1261600	PF3D7_1445400		OG0000593	PVP01_1217900
		OG0001643	PF3D7_1130600	OG0003609	PVP01_0527700	PF3D7_0418300				OG0001240	PF3D7_0722600	OG0004413	PVP01_1233500	PF3D7_1473300				OG0000717	PF3D7_0608800	OG0000322	PVP01_1262200	PF3D7_1444800		OG0005569	PVP01_1218000
		OG0001043	PF3D7_1023300	OG0003439	PVP01_0609300	PF3D7_1024100				OG0001244	PF3D7_0723100	OG0002709	PVP01_1233600	PF3D7_1473200				OG0000719	PF3D7_0609300	OG0002551	PVP01_1263200	PF3D7_1443800		OG0004463	PVP01_1218300
		OG0000914	PF3D7_0303200	OG0004480	PVP01_1212300	PF3D7_1342500				OG0001248	PF3D7_0723700	OG0002703	PVP01_1234700	PF3D7_1472100				OG0000722	PF3D7_0609800	OG0004317	PVP01_1263900	PF3D7_1443100		OG0002776	PVP01_1218400
		OG0003491	PF3D7_1203100	OG0002036	PVP01_1027500	PF3D7_0506500				OG0003550	PF3D7_0723800	OG0002699	PVP01_1235600	PF3D7_1471200				OG0000726	PF3D7_0610200	OG0004995	PVP01_1264600	PF3D7_1442400		OG0002775	PVP01_1218500
		OG0003928	PF3D7_1431400	OG0002683	PVP01_1238700	PF3D7_1468100				OG0001250	PF3D7_0724000	OG0004401	PVP01_1236500	PF3D7_1470300				OG0004760	PF3D7_0610700	OG0004313	PVP01_1265200	PF3D7_1441800		OG0004457	PVP01_1220800
		OG0004062	PF3D7_0616300	OG0003055	PVP01_1436900	PF3D7_1218100				OG0001253	PF3D7_0724400	OG0004400	PVP01_1236600	PF3D7_1470200				OG0000728	PF3D7_0610800	OG0002539	PVP01_1265400	PF3D7_1441600		OG0002771	PVP01_1221400
		OG0001219	PF3D7_0719300	OG0001592	PVP01_0943000	PF3D7_1142300				OG0001254	PF3D7_0724700	OG0004399	PVP01_1236900	PF3D7_1469900				OG0003270	PF3D7_0611700	OG0004312	PVP01_1265500	PF3D7_1441500		OG0004454	PVP01_1221500
		OG0001664	PF3D7_1126600	OG0000483	PVP01_0308000	PF3D7_0408700				OG0001255	PF3D7_0724800	OG0002692	PVP01_1237000	PF3D7_1469800				OG0000738	PF3D7_0612100	OG0004302	PVP01_1267500	PF3D7_1439500		OG0002756	PVP01_1223600
		OG0001676	PF3D7_1124700	OG0004582	PVP01_1425600	PF3D7_0814700				OG0001256	PF3D7_0724900	OG0004398	PVP01_1237300	PF3D7_1469500				OG0003271	PF3D7_0612200	OG0004297	PVP01_1269300	PF3D7_1474400		OG0004444	PVP01_1224800
		OG0001773	PF3D7_1108700	OG0000540	PVP01_0113600	PF3D7_0806800				OG0000413	PF3D7_0725000	OG0002685	PVP01_1238400	PF3D7_1468400				OG0003272	PF3D7_0612400	OG0002521	PVP01_1269400	PF3D7_1474500		OG0002751	PVP01_1225100
		OG0000373	PF3D7_0210100	OG0001778	PVP01_0908600	PF3D7_1107800				OG0003554	PF3D7_0725100	OG0002683	PVP01_1238700	PF3D7_1468100				OG0003273	PF3D7_0612500	OG0004293	PVP01_1270300	PF3D7_1475400		OG0002747	PVP01_1225700
		OG0004124	PF3D7_1359700	OG0002505	PVP01_1004000	PF3D7_0529900				OG0001258	PF3D7_0725300	OG0004396	PVP01_1238800	PF3D7_1468000				OG0003274	PF3D7_0612700	OG0002515	PVP01_1270500	PF3D7_1475600		OG0004439	PVP01_1226000
		OG0001183	PF3D7_1211600	OG0004334	PVP01_1258000	PF3D7_1449000				OG0000798	PF3D7_0726300	OG0002682	PVP01_1238900	PF3D7_1467900				OG0003275	PF3D7_0612800	OG0004996	PVP01_1271000	PF3D7_1476100		OG0002742	PVP01_1226900
		OG0001088	PF3D7_1032300	OG0002956	PVP01_1419600	PF3D7_1318700				OG0003300	PF3D7_0726400	OG0004394	PVP01_1239200	PF3D7_1467600				OG0000740	PF3D7_0612900	OG0001131	PVP01_1300800	PF3D7_1201500		OG0004437	PVP01_1227000
		OG0004238	PF3D7_0805500	OG0001631	PVP01_0934200	PF3D7_1133400				OG0003301	PF3D7_0726700	OG0002672	PVP01_1240400	PF3D7_1466400				OG0000282	PF3D7_0613300	OG0001137	PVP01_1301900	PF3D7_1202600		OG0004436	PVP01_1227100
		OG0000939	PF3D7_0306900	OG0004655	PVP01_1449600	PF3D7_1231400				OG0000802	PF3D7_0726900	OG0002663	PVP01_1242100	PF3D7_1464700				OG0000741	PF3D7_0613400	OG0000405	PVP01_1303000	PF3D7_1203700		OG0002741	PVP01_1227700
		OG0000227	PF3D7_0309200	OG0004044	PVP01_1022600	PF3D7_0511400				OG0000803	PF3D7_0727000	OG0004384	PVP01_1242200	PF3D7_1464600				OG0003277	PF3D7_0613600	OG0003493	PVP01_1303200	PF3D7_1204000		OG0004427	PVP01_1228500
		OG0002162	PF3D7_0630600	OG0003189	PVP01_1461700	PF3D7_1244600				OG0000804	PF3D7_0727100	OG0002656	PVP01_1244000	PF3D7_1462800				OG0000744	PF3D7_0614100	OG0001147	PVP01_1304100	PF3D7_1205000		OG0005114	PVP01_1228600
		OG0004074	PF3D7_0619800	OG0001783	PVP01_0908100	PF3D7_1107300				OG0000368	PF3D7_0727300	OG0000574	PVP01_1244500	PF3D7_1462300				OG0000746	PF3D7_0614300	OG0001149	PVP01_1304300	PF3D7_1205200		OG0002731	PVP01_1230400
		OG0003160	PF3D7_1238400	OG0003753	PVP01_0947600	PF3D7_1147000				OG0000806	PF3D7_0727500	OG0002652	PVP01_1245200	PF3D7_1461600				OG0002412	PF3D7_0614400	OG0000406	PVP01_1304900	PF3D7_1205800		OG0002727	PVP01_1231100
		OG0000358	PF3D7_0111000	OG0004384	PVP01_1242200	PF3D7_1464600				OG0000807	PF3D7_0727800	OG0002650	PVP01_1245500	PF3D7_1461300				OG0004248	PF3D7_0614600	OG0001152	PVP01_1305000	PF3D7_1205900		OG0004416	PVP01_1232200
		OG0000782	PF3D7_0106100	OG0001208	PVP01_0313300	PF3D7_0717500				OG0003304	PF3D7_0727900	OG0002642	PVP01_1246500	PF3D7_1460300				OG0002414	PF3D7_0614700	OG0001153	PVP01_1305300	PF3D7_1206200		OG0002718	PVP01_1232300
		OG0003094	PF3D7_1225300	OG0000871	PVP01_0412300	PF3D7_0212600				OG0000809	PF3D7_0728100	OG0002637	PVP01_1247100	PF3D7_1459800				OG0002415	PF3D7_0614800	OG0003501	PVP01_1305400	PF3D7_1206300		OG0004918	PVP01_1232500
		OG0003807	PF3D7_1131500	OG0001263	PVP01_0505600	PF3D7_0828800				OG0003305	PF3D7_0728200	OG0002627	PVP01_1248600	PF3D7_1458300				OG0002416	PF3D7_0614900	OG0001154	PVP01_1305500	PF3D7_1206400		OG0002716	PVP01_1232600
		OG0000362	PF3D7_0108400	OG0000648	PVP01_1465800	PF3D7_1248700				OG0000812	PF3D7_0728800	OG0004365	PVP01_1248900	PF3D7_1458000				OG0002419	PF3D7_0615300	OG0001157	PVP01_1305800	PF3D7_1206700		OG0002715	PVP01_1232700
		OG0002903	PF3D7_1310900	OG0003805	PVP01_0932700	PF3D7_1131900				OG0000813	PF3D7_0728900	OG0004361	PVP01_1249300	PF3D7_1457600				OG0002420	PF3D7_0615500	OG0003502	PVP01_1305900	PF3D7_1206800		OG0002714	PVP01_1232800
		OG0001196	PF3D7_0411400	OG0003348	PVP01_0410300	PF3D7_0214600				OG0003308	PF3D7_0729100	OG0004353	PVP01_1251200	PF3D7_1455700				OG0002421	PF3D7_0615600	OG0003504	PVP01_1306100	PF3D7_1207000		OG0002709	PVP01_1233600
		OG0003716	PF3D7_0926000	OG0004045	PVP01_1022500	PF3D7_0511500				OG0000816	PF3D7_0729300	OG0002608	PVP01_1253300	PF3D7_1453700				OG0002423	PF3D7_0615800	OG0001158	PVP01_1306200	PF3D7_1207100		OG0002708	PVP01_1233700
		OG0001108	PF3D7_1036600	OG0000892	PVP01_0407500	PF3D7_0217500				OG0000817	PF3D7_0729400	OG0002598	PVP01_1255300	PF3D7_1451700				OG0004250	PF3D7_0615900	OG0003506	PVP01_1306500	PF3D7_1207400		OG0002699	PVP01_1235600
		OG0000241	PF3D7_1134600	OG0001794	PVP01_0905700	PF3D7_1104900				OG0000820	PF3D7_0729700	OG0002591	PVP01_1256300	PF3D7_1450700				OG0002087	PF3D7_0616600	OG0001159	PVP01_1306600	PF3D7_1207500		OG0004401	PVP01_1236500
		OG0003217	PF3D7_1249900	OG0001965	PVP01_1339000	PF3D7_1409900				OG0000821	PF3D7_0729900	OG0004336	PVP01_1256600	PF3D7_1450400				OG0004066	PF3D7_0616900	OG0001164	PVP01_1307300	PF3D7_1208200		OG0004400	PVP01_1236600
		OG0001651	PF3D7_1129200	OG0001164	PVP01_1307300	PF3D7_1208200				OG0000824	PF3D7_0730200	OG0002587	PVP01_1256900	PF3D7_1450100				OG0002090	PF3D7_0617100	OG0003510	PVP01_1307900	PF3D7_1208800		OG0002692	PVP01_1237000
		OG0004787	PF3D7_1145900	OG0003785	PVP01_0938800	PF3D7_1137800				OG0000825	PF3D7_0730400	OG0000564	PVP01_1257400	PF3D7_1449600				OG0002094	PF3D7_0618000	OG0001167	PVP01_1308000	PF3D7_1208900		OG0002683	PVP01_1238700
		OG0001577	PF3D7_1145200	OG0003293	PVP01_0210600	PF3D7_0104100				OG0004247	PF3D7_0801300	OG0002579	PVP01_1257900	PF3D7_1449100				OG0002096	PF3D7_0618300	OG0001176	PVP01_1309300	PF3D7_1210100		OG0004396	PVP01_1238800
		OG0003535	PF3D7_0717000	OG0002205	PVP01_1110200	PF3D7_1361800				OG0002409	PF3D7_0801700	OG0004334	PVP01_1258000	PF3D7_1449000				OG0004070	PF3D7_0619200	OG0001181	PVP01_1310600	PF3D7_1211400		OG0002672	PVP01_1240400
		OG0004614	PF3D7_1217000	OG0000185	PVP01_1212200	PF3D7_1342600				OG0002406	PF3D7_0802000	OG0002578	PVP01_1258100	PF3D7_1448900				OG0004071	PF3D7_0619300	OG0003519	PVP01_1311000	PF3D7_1211800		OG0002671	PVP01_1240500
		OG0001556	PF3D7_0933200	OG0002407	PVP01_0118300	PF3D7_0801900				OG0002403	PF3D7_0802400	OG0004329	PVP01_1259900	PF3D7_1447100				OG0004074	PF3D7_0619800	OG0001185	PVP01_1311100	PF3D7_1211900		OG0002670	PVP01_1240700
		OG0003186	PF3D7_1244000	OG0004436	PVP01_1227100	PF3D7_1327300				OG0002402	PF3D7_0802500	OG0002564	PVP01_1260100	PF3D7_1446900				OG0004078	PF3D7_0620500	OG0001187	PVP01_1311600	PF3D7_1437900		OG0002663	PVP01_1242100
		OG0002602	PF3D7_1452500	OG0001137	PVP01_1301900	PF3D7_1202600				OG0002401	PF3D7_0802600	OG0004328	PVP01_1260300	PF3D7_1446700				OG0004079	PF3D7_0620600	OG0001192	PVP01_1312500	PF3D7_1437000		OG0004384	PVP01_1242200
		OG0003550	PF3D7_0723800	OG0003907	PVP01_0307900	PF3D7_0408600				OG0004245	PF3D7_0802700	OG0002557	PVP01_1261400	PF3D7_1445600				OG0004080	PF3D7_0621000	OG0003917	PVP01_1314200	PF3D7_1435300		OG0002656	PVP01_1244000
		OG0001672	PF3D7_1125100	OG0003815	PVP01_0929800	PF3D7_1129100				OG0002399	PF3D7_0803100	OG0000261	PVP01_1261600	PF3D7_1445400				OG0002108	PF3D7_0621400	OG0000300	PVP01_1315100	PF3D7_1434400		OG0000574	PVP01_1244500
		OG0000639	PF3D7_1233900	OG0003294	PVP01_0210700	PF3D7_0104000				OG0002397	PF3D7_0803400	OG0000322	PVP01_1262200	PF3D7_1444800				OG0002109	PF3D7_0621700	OG0001854	PVP01_1315600	PF3D7_1433900		OG0000573	PVP01_1245400
		OG0000195	PF3D7_0314700	OG0004612	PVP01_1435400	PF3D7_1216600				OG0004242	PF3D7_0803500	OG0002551	PVP01_1263200	PF3D7_1443800				OG0002111	PF3D7_0621900	OG0003922	PVP01_1316100	PF3D7_1433400		OG0002650	PVP01_1245500
		OG0004149	PF3D7_1368300	OG0002685	PVP01_1238400	PF3D7_1468400				OG0002395	PF3D7_0803800	OG0004317	PVP01_1263900	PF3D7_1443100				OG0004083	PF3D7_0622100	OG0001862	PVP01_1316800	PF3D7_1432700		OG0002642	PVP01_1246500
		OG0002452	PF3D7_0519500	OG0003207	PVP01_1464600	PF3D7_1247500				OG0002394	PF3D7_0804000	OG0004995	PVP01_1264600	PF3D7_1442400				OG0002112	PF3D7_0622200	OG0003925	PVP01_1317200	PF3D7_1432300		OG0002639	PVP01_1246800
		OG0002129	PF3D7_0624400	OG0003467	PVP01_0618200	PF3D7_1033100				OG0004240	PF3D7_0804400	OG0004313	PVP01_1265200	PF3D7_1441800				OG0002113	PF3D7_0622300	OG0001876	PVP01_1319200	PF3D7_1430200		OG0004369	PVP01_1247400
		OG0002027	PF3D7_0505100	OG0004293	PVP01_1270300	PF3D7_1475400				OG0002392	PF3D7_0804600	OG0002539	PVP01_1265400	PF3D7_1441600				OG0004084	PF3D7_0622700	OG0001877	PVP01_1319300	PF3D7_1430100		OG0002634	PVP01_1247500
		OG0002567	PF3D7_1447300	OG0001045	PVP01_0609100	PF3D7_1023900				OG0002389	PF3D7_0805000	OG0004312	PVP01_1265500	PF3D7_1441500				OG0002117	PF3D7_0622800	OG0001878	PVP01_1319400	PF3D7_1430000		OG0004368	PVP01_1248300
		OG0003168	PF3D7_1239500	OG0001731	PVP01_0917500	PF3D7_1116900				OG0004239	PF3D7_0805100	OG0004302	PVP01_1267500	PF3D7_1439500				OG0002119	PF3D7_0623000	OG0003936	PVP01_1321200	PF3D7_1428100		OG0004364	PVP01_1249000
		OG0000535	PF3D7_1011600	OG0004805	PVP01_1117100	PF3D7_1354700				OG0002387	PF3D7_0805300	OG0004299	PVP01_1268600	PF3D7_1438400				OG0000515	PF3D7_0623400	OG0003948	PVP01_1325300	PF3D7_1423700		OG0004361	PVP01_1249300
		OG0003959	PF3D7_1420500	OG0003549	PVP01_0319000	PF3D7_0723300				OG0004238	PF3D7_0805500	OG0004297	PVP01_1269300	PF3D7_1474400				OG0002123	PF3D7_0623700	OG0000212	PVP01_1325400	PF3D7_1423600		OG0002624	PVP01_1249700
		OG0001897	PF3D7_1425700	OG0003890	PVP01_0304200	PF3D7_0404800				OG0004948	PF3D7_0805600	OG0002521	PVP01_1269400	PF3D7_1474500				OG0004087	PF3D7_0623800	OG0001902	PVP01_1325700	PF3D7_1423300		OG0004353	PVP01_1251200
		OG0003702	PF3D7_0921600	OG0004064	PVP01_1132600	PF3D7_0616500				OG0004236	PF3D7_0806000	OG0002520	PVP01_1269500	PF3D7_1474600				OG0002124	PF3D7_0623900	OG0001903	PVP01_1325800	PF3D7_1423200		OG0002614	PVP01_1251500
		OG0004733	PF3D7_0807700	OG0000592	PVP01_1218700	PF3D7_1335900				OG0002384	PF3D7_0806200	OG0004293	PVP01_1270300	PF3D7_1475400				OG0002126	PF3D7_0624100	OG0001906	PVP01_1326500	PF3D7_1422500		OG0002611	PVP01_1252500
		OG0002520	PF3D7_1474600	OG0003368	PVP01_0835600	PF3D7_0304600				OG0002382	PF3D7_0806400	OG0002515	PVP01_1270500	PF3D7_1475600				OG0002127	PF3D7_0624200	OG0001909	PVP01_1326900	PF3D7_1422100		OG0004347	PVP01_1253100
		OG0004534	PF3D7_1307900							OG0000541	PF3D7_0806500	OG0004996	PVP01_1271000	PF3D7_1476100				OG0002129	PF3D7_0624400	OG0001926	PVP01_1331300	PF3D7_1417600		OG0002608	PVP01_1253300
		OG0002890	PF3D7_1308800							OG0002381	PF3D7_0806600	OG0001131	PVP01_1300800	PF3D7_1201500				OG0002130	PF3D7_0624500	OG0003970	PVP01_1331700	PF3D7_1417200		OG0002598	PVP01_1255300
		OG0001868	PF3D7_1431300							OG0002379	PF3D7_0807000	OG0001137	PVP01_1301900	PF3D7_1202600				OG0002132	PF3D7_0625300	OG0001936	PVP01_1333600	PF3D7_1415300		OG0005570	PVP01_1257800
		OG0003415	PF3D7_1017600							OG0002378	PF3D7_0807300	OG0000405	PVP01_1303000	PF3D7_1203700				OG0004092	PF3D7_0625400	OG0001939	PVP01_1333900	PF3D7_1415000		OG0004334	PVP01_1258000
		OG0001818	PF3D7_0406800							OG0004232	PF3D7_0807400	OG0003493	PVP01_1303200	PF3D7_1204000				OG0004093	PF3D7_0625500	OG0001943	PVP01_1334300	PF3D7_1414600		OG0004331	PVP01_1259200
		OG0003447	PF3D7_1026100							OG0004231	PF3D7_0807600	OG0001147	PVP01_1304100	PF3D7_1205000				OG0002133	PF3D7_0625600	OG0001944	PVP01_1334400	PF3D7_1414500		OG0004329	PVP01_1259900
		OG0001659	PF3D7_1127600							OG0004733	PF3D7_0807700	OG0001149	PVP01_1304300	PF3D7_1205200				OG0004095	PF3D7_0626000	OG0000497	PVP01_1334500	PF3D7_1414400		OG0002564	PVP01_1260100
		OG0002840	PF3D7_1349400							OG0002376	PF3D7_0807800	OG0000406	PVP01_1304900	PF3D7_1205800				OG0002135	PF3D7_0626300	OG0001946	PVP01_1334800	PF3D7_1414100		OG0004328	PVP01_1260300
		OG0003933	PF3D7_1428900							OG0002375	PF3D7_0807900	OG0001152	PVP01_1305000	PF3D7_1205900				OG0004097	PF3D7_0626600	OG0001947	PVP01_1334900	PF3D7_1414000		OG0000563	PVP01_1260400
		OG0001320	PF3D7_0820200							OG0004230	PF3D7_0808000	OG0001153	PVP01_1305300	PF3D7_1206200				OG0002140	PF3D7_0626900	OG0001952	PVP01_1335700	PF3D7_1413200		OG0000323	PVP01_1260800
		OG0001864	PF3D7_1432500							OG0004229	PF3D7_0808100	OG0003501	PVP01_1305400	PF3D7_1206300				OG0004098	PF3D7_0627000	OG0001961	PVP01_1338000	PF3D7_1410900		OG0002557	PVP01_1261400
		OG0004282	PF3D7_0528600							OG0002373	PF3D7_0808400	OG0001154	PVP01_1305500	PF3D7_1206400				OG0002154	PF3D7_0629400	OG0003992	PVP01_1338600	PF3D7_1410300		OG0002556	PVP01_1261500
		OG0002536	PF3D7_1441000							OG0004814	PF3D7_0808450	OG0001157	PVP01_1305800	PF3D7_1206700				OG0004106	PF3D7_0629900	OG0001965	PVP01_1339000	PF3D7_1409900		OG0000261	PVP01_1261600
		OG0002753	PF3D7_1330500							OG0004598	PF3D7_0809200	OG0003502	PVP01_1305900	PF3D7_1206800				OG0002158	PF3D7_0630100	OG0001967	PVP01_1339600	PF3D7_1409400		OG0000321	PVP01_1262700
		OG0002605	PF3D7_1452900							OG0000618	PF3D7_0809700	OG0003504	PVP01_1306100	PF3D7_1207000				OG0002160	PF3D7_0630300	OG0001973	PVP01_1340400	PF3D7_1408600		OG0002551	PVP01_1263200
		OG0004695	PF3D7_1244900							OG0004596	PF3D7_0809800	OG0001158	PVP01_1306200	PF3D7_1207100				OG0004108	PF3D7_0630700	OG0001975	PVP01_1341200	PF3D7_1407500		OG0004314	PVP01_1264900
		OG0001063	PF3D7_1027600							OG0003020	PF3D7_0810200	OG0003506	PVP01_1306500	PF3D7_1207400				OG0000517	PF3D7_0630900	OG0003998	PVP01_1341300	PF3D7_1407400		OG0002542	PVP01_1265000
		OG0000842	PF3D7_0205900							OG0004595	PF3D7_0810400	OG0001159	PVP01_1306600	PF3D7_1207500				OG0003620	PF3D7_0703400	OG0001976	PVP01_1341400	PF3D7_1407300		OG0004313	PVP01_1265200
		OG0000509	PF3D7_0508700							OG0000331	PF3D7_0811600	OG0001164	PVP01_1307300	PF3D7_1208200				OG0001386	PF3D7_0703500	OG0001977	PVP01_1341500	PF3D7_1407200		OG0002539	PVP01_1265400
		OG0003352	PF3D7_0216100							OG0003012	PF3D7_0811900	OG0003510	PVP01_1307900	PF3D7_1208800				OG0003624	PF3D7_0703900	OG0001984	PVP01_1342500	PF3D7_1406200		OG0004312	PVP01_1265500
		OG0001980	PF3D7_1406800							OG0003011	PF3D7_0812000	OG0001167	PVP01_1308000	PF3D7_1208900				OG0003625	PF3D7_0704000	OG0004001	PVP01_1342900	PF3D7_1405900		OG0004302	PVP01_1267500
		OG0003960	PF3D7_1419600							OG0003010	PF3D7_0812100	OG0001176	PVP01_1309300	PF3D7_1210100				OG0003627	PF3D7_0704300	OG0001987	PVP01_1343200	PF3D7_1405600		OG0002526	PVP01_1268100
		OG0001768	PF3D7_1110200							OG0003007	PF3D7_0812500	OG0001181	PVP01_1310600	PF3D7_1211400				OG0003630	PF3D7_0704800	OG0001990	PVP01_1343500	PF3D7_1405300		OG0004297	PVP01_1269300
		OG0001447	PF3D7_0912100							OG0003001	PF3D7_0813200	OG0003519	PVP01_1311000	PF3D7_1211800				OG0001389	PF3D7_0705000	OG0004003	PVP01_1343800	PF3D7_1405000		OG0002521	PVP01_1269400
		OG0002249	PF3D7_1368800							OG0004586	PF3D7_0813500	OG0001185	PVP01_1311100	PF3D7_1211900				OG0003632	PF3D7_0705100	OG0004004	PVP01_1343900	PF3D7_1404900		OG0002520	PVP01_1269500
		OG0001564	PF3D7_0935000							OG0002990	PF3D7_0815100	OG0001187	PVP01_1311600	PF3D7_1437900				OG0003634	PF3D7_0705700	OG0005007	PVP01_1344000	PF3D7_1404800		OG0002518	PVP01_1269800
		OG0001232	PF3D7_0721200							OG0002988	PF3D7_0815300	OG0001191	PVP01_1312300	PF3D7_1437200				OG0001398	PF3D7_0706700	OG0001995	PVP01_1344700	PF3D7_1404100		OG0002515	PVP01_1270500
		OG0004662	PF3D7_1232800							OG0003591	PF3D7_0815500	OG0001192	PVP01_1312500	PF3D7_1437000				OG0003637	PF3D7_0707200	OG0000502	PVP01_1347000	PF3D7_1401800		OG0004996	PVP01_1271000
		OG0003599	PF3D7_0416000							OG0001344	PF3D7_0815600	OG0003916	PVP01_1314000	PF3D7_1435500				OG0003638	PF3D7_0707300	OG0004518	PVP01_1403100	PF3D7_1302200		OG0001131	PVP01_1300800
		OG0000523	PF3D7_1358600							OG0001343	PF3D7_0815800	OG0003917	PVP01_1314200	PF3D7_1435300				OG0001399	PF3D7_0707400	OG0002861	PVP01_1403600	PF3D7_1302700		OG0004861	PVP01_1301400
		OG0001642	PF3D7_1130700							OG0001340	PF3D7_0816100	OG0000300	PVP01_1315100	PF3D7_1434400				OG0003640	PF3D7_0707800	OG0002865	PVP01_1404300	PF3D7_1303400		OG0001137	PVP01_1301900
		OG0000515	PF3D7_0623400							OG0001339	PF3D7_0816200	OG0001854	PVP01_1315600	PF3D7_1433900				OG0001403	PF3D7_0708000	OG0002867	PVP01_1404700	PF3D7_1303800		OG0000405	PVP01_1303000
		OG0003249	PF3D7_0603100							OG0000421	PF3D7_0816500	OG0003922	PVP01_1316100	PF3D7_1433400				OG0001404	PF3D7_0708100	OG0004523	PVP01_1405200	PF3D7_1304300		OG0003493	PVP01_1303200
		OG0003934	PF3D7_1428500							OG0000232	PF3D7_0816600	OG0001861	PVP01_1316700	PF3D7_1432800				OG0003642	PF3D7_0708200	OG0002870	PVP01_1405300	PF3D7_1304400		OG0003495	PVP01_1303400
		OG0003897	PF3D7_0406700							OG0001334	PF3D7_0817100	OG0001862	PVP01_1316800	PF3D7_1432700				OG0002356	PF3D7_0708500	OG0000265	PVP01_1405400	PF3D7_1304500		OG0001147	PVP01_1304100
		OG0000857	PF3D7_0209600							OG0001333	PF3D7_0817200	OG0003925	PVP01_1317200	PF3D7_1432300				OG0002362	PF3D7_0709300	OG0002873	PVP01_1405800	PF3D7_1304900		OG0001149	PVP01_1304300
		OG0001789	PF3D7_1106100							OG0001331	PF3D7_0817600	OG0001876	PVP01_1319200	PF3D7_1430200				OG0004221	PF3D7_0709800	OG0002874	PVP01_1405900	PF3D7_1305000		OG0000406	PVP01_1304900
		OG0003577	PF3D7_0819700							OG0001330	PF3D7_0817700	OG0001877	PVP01_1319300	PF3D7_1430100				OG0002365	PF3D7_0710100	OG0000609	PVP01_1407700	PF3D7_1306800		OG0003501	PVP01_1305400
		OG0003261	PF3D7_0608100							OG0001328	PF3D7_0818000	OG0001878	PVP01_1319400	PF3D7_1430000				OG0002368	PF3D7_0710600	OG0004534	PVP01_1408900	PF3D7_1307900		OG0001154	PVP01_1305500
		OG0003615	PF3D7_0419900							OG0003584	PF3D7_0818300	OG0003934	PVP01_1320900	PF3D7_1428500				OG0004226	PF3D7_0711200	OG0002894	PVP01_1410400	PF3D7_1309400		OG0001157	PVP01_1305800
		OG0000427	PF3D7_0319000							OG0001326	PF3D7_0818400	OG0003936	PVP01_1321200	PF3D7_1428100				OG0004227	PF3D7_0711300	OG0002897	PVP01_1410700	PF3D7_1309700		OG0003502	PVP01_1305900
		OG0002073	PF3D7_0513600							OG0003582	PF3D7_0819000	OG0003948	PVP01_1325300	PF3D7_1423700				OG0004574	PF3D7_0713500	OG0002901	PVP01_1411700	PF3D7_1310700		OG0001158	PVP01_1306200
		OG0000726	PF3D7_0610200							OG0003577	PF3D7_0819700	OG0000212	PVP01_1325400	PF3D7_1423600				OG0004575	PF3D7_0713900	OG0002907	PVP01_1412500	PF3D7_1311500		OG0003505	PVP01_1306400
		OG0001795	PF3D7_1104600							OG0003576	PF3D7_0819800	OG0001902	PVP01_1325700	PF3D7_1423300				OG0002978	PF3D7_0714300	OG0002908	PVP01_1412600	PF3D7_1311600		OG0003506	PVP01_1306500
		OG0000490	PF3D7_1425400							OG0001317	PF3D7_0820600	OG0001903	PVP01_1325800	PF3D7_1423200				OG0002980	PF3D7_0714600	OG0002915	PVP01_1413700	PF3D7_1312800		OG0001159	PVP01_1306600
		OG0000355	PF3D7_0602100							OG0001316	PF3D7_0820700	OG0003951	PVP01_1326400	PF3D7_1422600				OG0001201	PF3D7_0716100	OG0000613	PVP01_1413800	PF3D7_1312900		OG0001167	PVP01_1308000
		OG0003684	PF3D7_0916400							OG0003573	PF3D7_0820900	OG0001906	PVP01_1326500	PF3D7_1422500				OG0001203	PF3D7_0716600	OG0002927	PVP01_1415300	PF3D7_1314400		OG0004999	PVP01_1308200
		OG0003925	PF3D7_1432300							OG0004781	PF3D7_0821000	OG0001909	PVP01_1326900	PF3D7_1422100				OG0003534	PF3D7_0716700	OG0004555	PVP01_1415900	PF3D7_1315000		OG0001171	PVP01_1308600
		OG0001893	PF3D7_1426900							OG0001312	PF3D7_0821600	OG0001926	PVP01_1331300	PF3D7_1417600				OG0001204	PF3D7_0716800	OG0002935	PVP01_1416300	PF3D7_1315400		OG0001176	PVP01_1309300
		OG0004214	PF3D7_0320400							OG0001310	PF3D7_0821800	OG0003970	PVP01_1331700	PF3D7_1417200				OG0003535	PF3D7_0717000	OG0004558	PVP01_1416800	PF3D7_1315900		OG0001181	PVP01_1310600
		OG0001399	PF3D7_0707400							OG0001307	PF3D7_0822100	OG0001936	PVP01_1333600	PF3D7_1415300				OG0001207	PF3D7_0717400	OG0002939	PVP01_1417000	PF3D7_1316100		OG0003519	PVP01_1311000
		OG0001189	PF3D7_1437600							OG0001306	PF3D7_0822200	OG0001938	PVP01_1333800	PF3D7_1415100				OG0003537	PF3D7_0717600	OG0004563	PVP01_1419200	PF3D7_1318300		OG0001185	PVP01_1311100
		OG0002606	PF3D7_1453100							OG0001303	PF3D7_0822600	OG0001939	PVP01_1333900	PF3D7_1415000				OG0001209	PF3D7_0717700	OG0002958	PVP01_1420000	PF3D7_1319100		OG0001187	PVP01_1311600
		OG0003709	PF3D7_0924400							OG0000254	PF3D7_0822700	OG0001943	PVP01_1334300	PF3D7_1414600				OG0003538	PF3D7_0717800	OG0002960	PVP01_1420300	PF3D7_1319400		OG0003521	PVP01_1312000
		OG0000455	PF3D7_1145400							OG0003565	PF3D7_0824000	OG0001944	PVP01_1334400	PF3D7_1414500				OG0001210	PF3D7_0717900	OG0002968	PVP01_1421400	PF3D7_1320600		OG0001192	PVP01_1312500
		OG0002947	PF3D7_1317100							OG0001294	PF3D7_0824300	OG0000497	PVP01_1334500	PF3D7_1414400				OG0003539	PF3D7_0718000	OG0004572	PVP01_1422100	PF3D7_1321300		OG0000291	PVP01_1312600
		OG0000586	PF3D7_1328300							OG0001293	PF3D7_0824400	OG0001946	PVP01_1334800	PF3D7_1414100				OG0001211	PF3D7_0718100	OG0002975	PVP01_1422800	PF3D7_0713700		OG0003916	PVP01_1314000
		OG0003971	PF3D7_1417100							OG0003563	PF3D7_0824900	OG0001947	PVP01_1334900	PF3D7_1414000				OG0001212	PF3D7_0718300	OG0004576	PVP01_1423300	PF3D7_0714200		OG0000300	PVP01_1315100
		OG0002706	PF3D7_1472700							OG0001288	PF3D7_0825300	OG0001952	PVP01_1335700	PF3D7_1413200				OG0001213	PF3D7_0718400	OG0002979	PVP01_1423600	PF3D7_0714500		OG0001850	PVP01_1315200
		OG0001025	PF3D7_1020100							OG0001283	PF3D7_0825800	OG0001961	PVP01_1338000	PF3D7_1410900				OG0001215	PF3D7_0718600	OG0004582	PVP01_1425600	PF3D7_0814700		OG0001851	PVP01_1315300
		OG0004639	PF3D7_1226100							OG0003560	PF3D7_0826900	OG0003992	PVP01_1338600	PF3D7_1410300				OG0001218	PF3D7_0719100	OG0002991	PVP01_1425700	PF3D7_0814600		OG0001854	PVP01_1315600
		OG0003761	PF3D7_1144200							OG0000415	PF3D7_0827100	OG0001965	PVP01_1339000	PF3D7_1409900				OG0001219	PF3D7_0719300	OG0002992	PVP01_1425800	PF3D7_0814500		OG0003922	PVP01_1316100
		OG0003865	PF3D7_1108100							OG0003559	PF3D7_0827300	OG0001967	PVP01_1339600	PF3D7_1409400				OG0003541	PF3D7_0719400	OG0002993	PVP01_1425900	PF3D7_0814400		OG0001877	PVP01_1319300
		OG0001861	PF3D7_1432800							OG0000209	PF3D7_0827900	OG0001972	PVP01_1340300	PF3D7_1408700				OG0001221	PF3D7_0719600	OG0002994	PVP01_1426100	PF3D7_0814200		OG0001878	PVP01_1319400
		OG0001013	PF3D7_1017400							OG0003557	PF3D7_0828100	OG0001973	PVP01_1340400	PF3D7_1408600				OG0001223	PF3D7_0719800	OG0003000	PVP01_1427000	PF3D7_0813300		OG0003934	PVP01_1320900
		OG0003803	PF3D7_1132500							OG0001269	PF3D7_0828200	OG0001975	PVP01_1341200	PF3D7_1407500				OG0001224	PF3D7_0719900	OG0003002	PVP01_1427200	PF3D7_0813100		OG0003936	PVP01_1321200
		OG0004573	PF3D7_1321600							OG0001266	PF3D7_0828500	OG0003998	PVP01_1341300	PF3D7_1407400				OG0003543	PF3D7_0720700	OG0003003	PVP01_1427300	PF3D7_0813000		OG0004796	PVP01_1321600
		OG0001070	PF3D7_1028800							OG0000414	PF3D7_0828900	OG0001976	PVP01_1341400	PF3D7_1407300				OG0001229	PF3D7_0720800	OG0003008	PVP01_1427800	PF3D7_0812400		OG0001892	PVP01_1321900
		OG0001992	PF3D7_1405100							OG0001262	PF3D7_0829000	OG0001977	PVP01_1341500	PF3D7_1407200				OG0001230	PF3D7_0720900	OG0004588	PVP01_1427900	PF3D7_0812300		OG0001900	PVP01_1324800
		OG0003565	PF3D7_0824000							OG0001259	PF3D7_0829300	OG0001984	PVP01_1342500	PF3D7_1406200				OG0003544	PF3D7_0721000	OG0003013	PVP01_1428900	PF3D7_0811400		OG0000212	PVP01_1325400
		OG0001876	PF3D7_1430200							OG0000293	PF3D7_0829400	OG0004001	PVP01_1342900	PF3D7_1405900				OG0001232	PF3D7_0721200	OG0004593	PVP01_1429000	PF3D7_0811300		OG0001902	PVP01_1325700
		OG0001446	PF3D7_0911700							OG0004962	PF3D7_0829600	OG0001987	PVP01_1343200	PF3D7_1405600				OG0001238	PF3D7_0722300	OG0003016	PVP01_1429400	PF3D7_0810900		OG0001903	PVP01_1325800
		OG0003882	PF3D7_0403600							OG0004965	PF3D7_0902900	OG0001990	PVP01_1343500	PF3D7_1405300				OG0000412	PF3D7_0722400	OG0003018	PVP01_1429700	PF3D7_0810600		OG0001906	PVP01_1326500
		OG0000558	PF3D7_1439900							OG0001006	PF3D7_0903400	OG0004003	PVP01_1343800	PF3D7_1405000				OG0001239	PF3D7_0722500	OG0000266	PVP01_1430000	PF3D7_0810300		OG0001909	PVP01_1326900
		OG0004686	PF3D7_1242000							OG0001005	PF3D7_0903600	OG0004004	PVP01_1343900	PF3D7_1404900				OG0001240	PF3D7_0722600	OG0003023	PVP01_1430900	PF3D7_0809400		OG0003956	PVP01_1327800
		OG0001166	PF3D7_1208700							OG0001004	PF3D7_0903900	OG0005007	PVP01_1344000	PF3D7_1404800				OG0001244	PF3D7_0723100	OG0003028	PVP01_1431600	PF3D7_1212700		OG0000303	PVP01_1329100
		OG0001030	PF3D7_1020800							OG0001002	PF3D7_0904100	OG0001995	PVP01_1344700	PF3D7_1404100				OG0001248	PF3D7_0723700	OG0003029	PVP01_1431700	PF3D7_1212800		OG0004799	PVP01_1329700
		OG0004107	PF3D7_0630400							OG0001000	PF3D7_0904300	OG0000502	PVP01_1347000	PF3D7_1401800				OG0003550	PF3D7_0723800	OG0003030	PVP01_1431800	PF3D7_1212900		OG0003968	PVP01_1330800
		OG0004907	PF3D7_1031500							OG0000997	PF3D7_0904600	OG0004518	PVP01_1403100	PF3D7_1302200				OG0001249	PF3D7_0723900	OG0000620	PVP01_1432200	PF3D7_1213400		OG0001922	PVP01_1330900
		OG0002112	PF3D7_0622200							OG0003410	PF3D7_0904700	OG0002860	PVP01_1403500	PF3D7_1302600				OG0001250	PF3D7_0724000	OG0003048	PVP01_1435100	PF3D7_1216300		OG0001924	PVP01_1331100
		OG0001516	PF3D7_0924700							OG0000388	PF3D7_0904900	OG0002861	PVP01_1403600	PF3D7_1302700				OG0001253	PF3D7_0724400	OG0004610	PVP01_1435200	PF3D7_1216400		OG0000495	PVP01_1331500
		OG0003881	PF3D7_0403400							OG0000387	PF3D7_0905200	OG0002865	PVP01_1404300	PF3D7_1303400				OG0001254	PF3D7_0724700	OG0004612	PVP01_1435400	PF3D7_1216600		OG0003970	PVP01_1331700
		OG0002311	PF3D7_1012000							OG0003407	PF3D7_0905400	OG0002867	PVP01_1404700	PF3D7_1303800				OG0001255	PF3D7_0724800	OG0004613	PVP01_1435500	PF3D7_1216700		OG0003976	PVP01_1333500
		OG0001942	PF3D7_1414700							OG0000992	PF3D7_0905900	OG0004523	PVP01_1405200	PF3D7_1304300				OG0001256	PF3D7_0724900	OG0003049	PVP01_1435700	PF3D7_1216900		OG0001944	PVP01_1334400
		OG0000781	PF3D7_0106200							OG0000989	PF3D7_0906400	OG0002870	PVP01_1405300	PF3D7_1304400				OG0000413	PF3D7_0725000	OG0004614	PVP01_1435800	PF3D7_1217000		OG0000497	PVP01_1334500
		OG0001751	PF3D7_1113000							OG0004966	PF3D7_0906700	OG0002873	PVP01_1405800	PF3D7_1304900				OG0003554	PF3D7_0725100	OG0003051	PVP01_1436200	PF3D7_1217400		OG0001946	PVP01_1334800
		OG0001170	PF3D7_1209400							OG0004782	PF3D7_0906890	OG0002874	PVP01_1405900	PF3D7_1305000				OG0001258	PF3D7_0725300	OG0004617	PVP01_1436800	PF3D7_1218000		OG0001947	PVP01_1334900
		OG0001255	PF3D7_0724800							OG0003654	PF3D7_0907100	OG0000609	PVP01_1407700	PF3D7_1306800				OG0000798	PF3D7_0726300	OG0003056	PVP01_1437000	PF3D7_1218200		OG0003978	PVP01_1335200
		OG0003502	PF3D7_1206800							OG0001422	PF3D7_0907600	OG0004537	PVP01_1409400	PF3D7_1308400				OG0003300	PF3D7_0726400	OG0003057	PVP01_1437200	PF3D7_1218400		OG0001952	PVP01_1335700
		OG0000929	PF3D7_0305500							OG0001423	PF3D7_0907700	OG0002894	PVP01_1410400	PF3D7_1309400				OG0003301	PF3D7_0726700	OG0004620	PVP01_1437700	PF3D7_1218900		OG0001961	PVP01_1338000
		OG0004615	PF3D7_1217500							OG0001425	PF3D7_0907900	OG0002897	PVP01_1410700	PF3D7_1309700				OG0000802	PF3D7_0726900	OG0003060	PVP01_1437800	PF3D7_1219000		OG0000499	PVP01_1338100
		OG0002479	PF3D7_0525100							OG0003656	PF3D7_0908100	OG0002901	PVP01_1411700	PF3D7_1310700				OG0000803	PF3D7_0727000	OG0000625	PVP01_1438000	PF3D7_1219600		OG0003992	PVP01_1338600
		OG0001863	PF3D7_1432600							OG0003657	PF3D7_0908200	OG0002907	PVP01_1412500	PF3D7_1311500				OG0000804	PF3D7_0727100	OG0000627	PVP01_1439300	PF3D7_1221000		OG0003994	PVP01_1339100
		OG0004975	PF3D7_0520500							OG0001429	PF3D7_0908800	OG0002908	PVP01_1412600	PF3D7_1311600				OG0000368	PF3D7_0727300	OG0000628	PVP01_1440900	PF3D7_1222700		OG0001967	PVP01_1339600
		OG0000370	PF3D7_0204500							OG0003658	PF3D7_0908900	OG0004551	PVP01_1413500	PF3D7_1312500				OG0000806	PF3D7_0727500	OG0000629	PVP01_1441300	PF3D7_1223100		OG0001975	PVP01_1341200
		OG0001084	PF3D7_1031600							OG0000431	PF3D7_0909000	OG0002915	PVP01_1413700	PF3D7_1312800				OG0000807	PF3D7_0727800	OG0003080	PVP01_1441500	PF3D7_1223300		OG0003998	PVP01_1341300
		OG0001793	PF3D7_1105400							OG0001430	PF3D7_0909200	OG0000613	PVP01_1413800	PF3D7_1312900				OG0003304	PF3D7_0727900	OG0003081	PVP01_1441600	PF3D7_1223400		OG0001976	PVP01_1341400
		OG0003212	PF3D7_1248600							OG0001432	PF3D7_0909700	OG0002935	PVP01_1416300	PF3D7_1315400				OG0000809	PF3D7_0728100	OG0004632	PVP01_1442400	PF3D7_1224200		OG0001977	PVP01_1341500
		OG0000880	PF3D7_0214800							OG0004910	PF3D7_0910500	OG0004558	PVP01_1416800	PF3D7_1315900				OG0003305	PF3D7_0728200	OG0003105	PVP01_1445900	PF3D7_1227700		OG0001984	PVP01_1342500
		OG0000698	PF3D7_0605800							OG0001443	PF3D7_0911000	OG0002939	PVP01_1417000	PF3D7_1316100				OG0000812	PF3D7_0728800	OG0003115	PVP01_1447500	PF3D7_1229400		OG0004001	PVP01_1342900
		OG0000478	PF3D7_1107900							OG0001444	PF3D7_0911100	OG0004560	PVP01_1418200	PF3D7_1317300				OG0000813	PF3D7_0728900	OG0004655	PVP01_1449600	PF3D7_1231400		OG0001990	PVP01_1343500
		OG0004365	PF3D7_1458000							OG0003663	PF3D7_0911200	OG0004563	PVP01_1419200	PF3D7_1318300				OG0000814	PF3D7_0729000	OG0003130	PVP01_1450600	PF3D7_1232400		OG0004003	PVP01_1343800
		OG0004420	PF3D7_1324300							OG0003664	PF3D7_0911300	OG0002954	PVP01_1419300	PF3D7_1318400				OG0003308	PF3D7_0729100	OG0003141	PVP01_1453000	PF3D7_1234900		OG0004004	PVP01_1343900
		OG0001790	PF3D7_1106000							OG0003665	PF3D7_0911400	OG0002958	PVP01_1420000	PF3D7_1319100				OG0000816	PF3D7_0729300	OG0004668	PVP01_1453200	PF3D7_1235100		OG0005007	PVP01_1344000
		OG0002839	PF3D7_1349300							OG0003666	PF3D7_0911600	OG0002960	PVP01_1420300	PF3D7_1319400				OG0000817	PF3D7_0729400	OG0000640	PVP01_1453400	PF3D7_1235300		OG0004005	PVP01_1344100
		OG0000959	PF3D7_0310400							OG0001446	PF3D7_0911700	OG0002968	PVP01_1421400	PF3D7_1320600				OG0000820	PF3D7_0729700	OG0004672	PVP01_1454200	PF3D7_1236100		OG0004007	PVP01_1344600
		OG0002970	PF3D7_1320800							OG0001447	PF3D7_0912100	OG0004572	PVP01_1422100	PF3D7_1321300				OG0000821	PF3D7_0729900	OG0003149	PVP01_1454400	PF3D7_1236300		OG0001995	PVP01_1344700
		OG0001185	PF3D7_1211900							OG0001448	PF3D7_0912200	OG0002975	PVP01_1422800	PF3D7_0713700				OG0000824	PF3D7_0730200	OG0000641	PVP01_1454700	PF3D7_1236600		OG0002000	PVP01_1346200
		OG0004410	PF3D7_1472600							OG0003670	PF3D7_0912600	OG0004576	PVP01_1423300	PF3D7_0714200				OG0000825	PF3D7_0730400	OG0003151	PVP01_1454900	PF3D7_1236800		OG0002005	PVP01_1346800
		OG0002230	PF3D7_1365600							OG0003672	PF3D7_0913200	OG0002979	PVP01_1423600	PF3D7_0714500				OG0004247	PF3D7_0801300	OG0003152	PVP01_1455000	PF3D7_1236900		OG0000502	PVP01_1347000
		OG0000744	PF3D7_0614100							OG0001457	PF3D7_0913500	OG0004582	PVP01_1425600	PF3D7_0814700				OG0002409	PF3D7_0801700	OG0004677	PVP01_1455600	PF3D7_1237500		OG0004518	PVP01_1403100
		OG0002784	PF3D7_1337800							OG0001458	PF3D7_0913700	OG0002991	PVP01_1425700	PF3D7_0814600				OG0002406	PF3D7_0802000	OG0004679	PVP01_1456000	PF3D7_1237900		OG0002861	PVP01_1403600
		OG0003007	PF3D7_0812500							OG0003674	PF3D7_0913900	OG0002992	PVP01_1425800	PF3D7_0814500				OG0002404	PF3D7_0802300	OG0004922	PVP01_1456100	PF3D7_1238000		OG0004521	PVP01_1404200
		OG0003156	PF3D7_1237600							OG0001459	PF3D7_0914000	OG0002993	PVP01_1425900	PF3D7_0814400				OG0002403	PF3D7_0802400	OG0003159	PVP01_1456400	PF3D7_1238300		OG0002865	PVP01_1404300
		OG0004256	PF3D7_0520800							OG0000295	PF3D7_0915400	OG0004583	PVP01_1426000	PF3D7_0814300				OG0002402	PF3D7_0802500	OG0003160	PVP01_1456500	PF3D7_1238400		OG0002867	PVP01_1404700
		OG0004309	PF3D7_1440900							OG0001470	PF3D7_0916200	OG0002994	PVP01_1426100	PF3D7_0814200				OG0002401	PF3D7_0802600	OG0004681	PVP01_1456600	PF3D7_1238500		OG0002868	PVP01_1404900
		OG0002485	PF3D7_0526300							OG0001474	PF3D7_0916900	OG0003000	PVP01_1427000	PF3D7_0813300				OG0004245	PF3D7_0802700	OG0004683	PVP01_1457900	PF3D7_1239800		OG0004523	PVP01_1405200
		OG0003396	PF3D7_0315000							OG0003687	PF3D7_0917400	OG0003002	PVP01_1427200	PF3D7_0813100				OG0002399	PF3D7_0803100	OG0003170	PVP01_1458000	PF3D7_1239900		OG0000606	PVP01_1405700
		OG0003274	PF3D7_0612700							OG0001480	PF3D7_0918200	OG0003003	PVP01_1427300	PF3D7_0813000				OG0002397	PF3D7_0803400	OG0003175	PVP01_1459000	PF3D7_1241900		OG0002873	PVP01_1405800
		OG0003425	PF3D7_1020600							OG0000256	PF3D7_0918600	OG0003008	PVP01_1427800	PF3D7_0812400				OG0004242	PF3D7_0803500	OG0003182	PVP01_1460600	PF3D7_1243500		OG0002874	PVP01_1405900
		OG0002233	PF3D7_1366200							OG0001482	PF3D7_0918800	OG0004588	PVP01_1427900	PF3D7_0812300				OG0002395	PF3D7_0803800	OG0000645	PVP01_1460700	PF3D7_1243600		OG0004530	PVP01_1407600
		OG0000612	PF3D7_1312600							OG0001486	PF3D7_0919200	OG0003013	PVP01_1428900	PF3D7_0811400				OG0002394	PF3D7_0804000	OG0003185	PVP01_1461000	PF3D7_1243900		OG0002889	PVP01_1409300
		OG0001837	PF3D7_0410600							OG0001487	PF3D7_0919300	OG0004593	PVP01_1429000	PF3D7_0811300				OG0004240	PF3D7_0804400	OG0003187	PVP01_1461200	PF3D7_1244100		OG0002897	PVP01_1410700
		OG0002336	PF3D7_0323500							OG0003693	PF3D7_0919900	OG0003016	PVP01_1429400	PF3D7_0810900				OG0002389	PF3D7_0805000	OG0004693	PVP01_1461500	PF3D7_1244400		OG0002901	PVP01_1411700
		OG0004700	PF3D7_1247900							OG0001491	PF3D7_0920000	OG0003018	PVP01_1429700	PF3D7_0810600				OG0004239	PF3D7_0805100	OG0003189	PVP01_1461700	PF3D7_1244600		OG0002907	PVP01_1412500
		OG0002886	PF3D7_1307700							OG0001493	PF3D7_0920500	OG0000266	PVP01_1430000	PF3D7_0810300				OG0002387	PF3D7_0805300	OG0003190	PVP01_1461800	PF3D7_1244700		OG0002908	PVP01_1412600
		OG0000568	PF3D7_1454300							OG0003696	PF3D7_0920600	OG0003023	PVP01_1430900	PF3D7_0809400				OG0002386	PF3D7_0805400	OG0003197	PVP01_1462800	PF3D7_1245800		OG0004551	PVP01_1413500
		OG0002966	PF3D7_1320400							OG0003699	PF3D7_0921200	OG0003028	PVP01_1431600	PF3D7_1212700				OG0004238	PF3D7_0805500	OG0003199	PVP01_1463400	PF3D7_1246300		OG0000613	PVP01_1413800
		OG0003872	PF3D7_1105900							OG0003702	PF3D7_0921600	OG0003029	PVP01_1431700	PF3D7_1212800				OG0004948	PF3D7_0805600	OG0000267	PVP01_1463500	PF3D7_1246400		OG0002927	PVP01_1415300
		OG0003663	PF3D7_0911200							OG0001496	PF3D7_0921700	OG0003030	PVP01_1431800	PF3D7_1212900				OG0004236	PF3D7_0806000	OG0000647	PVP01_1464000	PF3D7_1246900		OG0002928	PVP01_1415400
		OG0002806	PF3D7_1341900							OG0003705	PF3D7_0922800	OG0000620	PVP01_1432200	PF3D7_1213400				OG0002384	PF3D7_0806200	OG0003203	PVP01_1464200	PF3D7_1247100		OG0002932	PVP01_1415800
		OG0001968	PF3D7_1409300							OG0001505	PF3D7_0922900	OG0003048	PVP01_1435100	PF3D7_1216300				OG0002382	PF3D7_0806400	OG0003207	PVP01_1464600	PF3D7_1247500		OG0004555	PVP01_1415900
		OG0002381	PF3D7_0806600							OG0003707	PF3D7_0923400	OG0004610	PVP01_1435200	PF3D7_1216400				OG0000541	PF3D7_0806500	OG0003211	PVP01_1465600	PF3D7_1248500		OG0002935	PVP01_1416300
		OG0004535	PF3D7_1308000							OG0003708	PF3D7_0924100	OG0004612	PVP01_1435400	PF3D7_1216600				OG0002381	PF3D7_0806600	OG0000648	PVP01_1465800	PF3D7_1248700		OG0004558	PVP01_1416800
		OG0000463	PF3D7_1133200							OG0003709	PF3D7_0924400	OG0004613	PVP01_1435500	PF3D7_1216700				OG0004235	PF3D7_0806700	OG0004835	PVP01_1466700	PF3D7_1249600		OG0002939	PVP01_1417000
		OG0003041	PF3D7_1215200							OG0001515	PF3D7_0924500	OG0003049	PVP01_1435700	PF3D7_1216900				OG0002379	PF3D7_0807000	OG0003223	PVP01_1468000	PF3D7_1250900		OG0004829	PVP01_1417200
		OG0003895	PF3D7_0406500							OG0001516	PF3D7_0924700	OG0003051	PVP01_1436200	PF3D7_1217400				OG0002378	PF3D7_0807300	OG0004712	PVP01_1468200	PF3D7_1251100		OG0002940	PVP01_1417300
		OG0000491	PF3D7_1423000							OG0001517	PF3D7_0924800	OG0004617	PVP01_1436800	PF3D7_1218000				OG0004232	PF3D7_0807400	OG0004715	PVP01_1468900	PF3D7_1251800		OG0004561	PVP01_1418300
		OG0002594	PF3D7_1451300							OG0004911	PF3D7_0924900	OG0003055	PVP01_1436900	PF3D7_1218100				OG0004231	PF3D7_0807600	OG0001388	PVP01_0104800	PF3D7_0704600		OG0002948	PVP01_1418400
		OG0000308	PF3D7_0626100							OG0003713	PF3D7_0925300	OG0003056	PVP01_1437000	PF3D7_1218200				OG0004733	PF3D7_0807700	OG0002361	PVP01_0109400	PF3D7_0709100		OG0002949	PVP01_1418500
		OG0001087	PF3D7_1032000							OG0001520	PF3D7_0925700	OG0003057	PVP01_1437200	PF3D7_1218400				OG0002376	PF3D7_0807800	OG0000542	PVP01_0117000	PF3D7_0803200		OG0004563	PVP01_1419200
		OG0002838	PF3D7_1349200							OG0001521	PF3D7_0925800	OG0004620	PVP01_1437700	PF3D7_1218900				OG0002375	PF3D7_0807900	OG0002405	PVP01_0118000	PF3D7_0802200		OG0002960	PVP01_1420300
		OG0001024	PF3D7_1020000							OG0003716	PF3D7_0926000	OG0003060	PVP01_1437800	PF3D7_1219000				OG0004230	PF3D7_0808000	OG0000543	PVP01_0118100	PF3D7_0802100		OG0002968	PVP01_1421400
		OG0003526	PF3D7_0411000							OG0001522	PF3D7_0926100	OG0000625	PVP01_1438000	PF3D7_1219600				OG0004229	PF3D7_0808100	OG0000226	PVP01_0207400	PF3D7_0107500		OG0004572	PVP01_1422100
		OG0001884	PF3D7_1429100							OG0000442	PF3D7_0926300	OG0000627	PVP01_1439300	PF3D7_1221000				OG0002373	PF3D7_0808400	OG0003882	PVP01_0302900	PF3D7_0403600		OG0002973	PVP01_1422500
		OG0001689	PF3D7_1123300							OG0003717	PF3D7_0926400	OG0000628	PVP01_1440900	PF3D7_1222700				OG0004814	PF3D7_0808450	OG0003525	PVP01_0310100	PF3D7_0410800		OG0002974	PVP01_1422700
		OG0000541	PF3D7_0806500							OG0001524	PF3D7_0926500	OG0000629	PVP01_1441300	PF3D7_1223100				OG0004598	PF3D7_0809200	OG0001205	PVP01_0312900	PF3D7_0717100		OG0002975	PVP01_1422800
		OG0003355	PF3D7_0216500							OG0001525	PF3D7_0926700	OG0003080	PVP01_1441500	PF3D7_1223300				OG0000618	PF3D7_0809700	OG0003547	PVP01_0317900	PF3D7_0722200		OG0004577	PVP01_1423500
		OG0001348	PF3D7_0413900							OG0003719	PF3D7_0926800	OG0003081	PVP01_1441600	PF3D7_1223400				OG0004596	PF3D7_0809800	OG0000375	PVP01_0413500	PF3D7_0211500		OG0002979	PVP01_1423600
		OG0003640	PF3D7_0707800							OG0001529	PF3D7_0927200	OG0004632	PVP01_1442400	PF3D7_1224200				OG0003020	PF3D7_0810200	OG0003312	PVP01_0422100	PF3D7_0203000		OG0000616	PVP01_1425500
		OG0004071	PF3D7_0619300							OG0001533	PF3D7_0927700	OG0003105	PVP01_1445900	PF3D7_1227700				OG0000331	PF3D7_0811600	OG0001380	PVP01_0529000	PF3D7_0419600		OG0004582	PVP01_1425600
		OG0004370	PF3D7_1460500							OG0000443	PF3D7_0927900	OG0003115	PVP01_1447500	PF3D7_1229400				OG0003012	PF3D7_0811900	OG0001129	PVP01_0532000	PF3D7_0423500		OG0002991	PVP01_1425700
		OG0000700	PF3D7_0606100							OG0001538	PF3D7_0928400	OG0004653	PVP01_1449200	PF3D7_1231000				OG0003011	PF3D7_0812000	OG0001015	PVP01_0603200	PF3D7_1018000		OG0002992	PVP01_1425800
		OG0003098	PF3D7_1226400							OG0003722	PF3D7_0928500	OG0004655	PVP01_1449600	PF3D7_1231400				OG0003010	PF3D7_0812100	OG0001017	PVP01_0603700	PF3D7_1018500		OG0002993	PVP01_1425900
		OG0003054	PF3D7_1217900							OG0003723	PF3D7_0928700	OG0003130	PVP01_1450600	PF3D7_1232400				OG0003007	PF3D7_0812500	OG0001031	PVP01_0606100	PF3D7_1020900		OG0004583	PVP01_1426000
		OG0002436	PF3D7_0517500							OG0003724	PF3D7_0928800	OG0003136	PVP01_1452100	PF3D7_1234000				OG0003001	PF3D7_0813200	OG0003432	PVP01_0607500	PF3D7_1022300		OG0002994	PVP01_1426100
		OG0002081	PF3D7_0515400							OG0001540	PF3D7_0929100	OG0003141	PVP01_1453000	PF3D7_1234900				OG0004586	PF3D7_0813500	OG0001051	PVP01_0610200	PF3D7_1025000		OG0003000	PVP01_1427000
		OG0001491	PF3D7_0920000							OG0000445	PF3D7_0929200	OG0004668	PVP01_1453200	PF3D7_1235100				OG0002990	PF3D7_0815100	OG0003453	PVP01_0613800	PF3D7_1028700		OG0003002	PVP01_1427200
		OG0003913	PF3D7_1436100							OG0003725	PF3D7_0929300	OG0000640	PVP01_1453400	PF3D7_1235300				OG0002988	PF3D7_0815300	OG0001075	PVP01_0615200	PF3D7_1030100		OG0003008	PVP01_1427800
		OG0001955	PF3D7_1412400							OG0003726	PF3D7_0929400	OG0004670	PVP01_1453500	PF3D7_1235400				OG0003591	PF3D7_0815500	OG0001081	PVP01_0615900	PF3D7_1030800		OG0004588	PVP01_1427900
		OG0003827	PF3D7_1125200							OG0001542	PF3D7_0929600	OG0004672	PVP01_1454200	PF3D7_1236100				OG0001344	PF3D7_0815600	OG0002282	PVP01_0806800	PF3D7_1007100		OG0004593	PVP01_1429000
		OG0003277	PF3D7_0613600							OG0003728	PF3D7_0930100	OG0003149	PVP01_1454400	PF3D7_1236300				OG0001343	PF3D7_0815800	OG0002342	PVP01_0818300	PF3D7_0321900		OG0000617	PVP01_1429300
		OG0003812	PF3D7_1130900							OG0003730	PF3D7_0930300	OG0000641	PVP01_1454700	PF3D7_1236600				OG0001340	PF3D7_0816100	OG0000379	PVP01_0832800	PF3D7_0307400		OG0003016	PVP01_1429400
		OG0002394	PF3D7_0804000							OG0001545	PF3D7_0930500	OG0003151	PVP01_1454900	PF3D7_1236800				OG0001339	PF3D7_0816200	OG0003369	PVP01_0835400	PF3D7_0304800		OG0003018	PVP01_1429700
		OG0002412	PF3D7_0614400							OG0001546	PF3D7_0930600	OG0003152	PVP01_1455000	PF3D7_1236900				OG0000421	PF3D7_0816500	OG0001773	PVP01_0909500	PF3D7_1108700		OG0000266	PVP01_1430000
		OG0001265	PF3D7_0828600							OG0003733	PF3D7_0931000	OG0003154	PVP01_1455200	PF3D7_1237100				OG0000232	PF3D7_0816600	OG0003844	PVP01_0917400	PF3D7_1116800		OG0004921	PVP01_1430400
		OG0002661	PF3D7_1464000							OG0001549	PF3D7_0931600	OG0004677	PVP01_1455600	PF3D7_1237500				OG0001334	PF3D7_0817100	OG0001718	PVP01_0919800	PF3D7_1119200		OG0003028	PVP01_1431600
		OG0001363	PF3D7_0416400							OG0003737	PF3D7_0931700	OG0004679	PVP01_1456000	PF3D7_1237900				OG0001333	PF3D7_0817200	OG0001702	PVP01_0922100	PF3D7_1121500		OG0003029	PVP01_1431700
		OG0004982	PF3D7_0604600							OG0000447	PF3D7_0931900	OG0004922	PVP01_1456100	PF3D7_1238000				OG0001331	PF3D7_0817600	OG0001677	PVP01_0925200	PF3D7_1124600		OG0003030	PVP01_1431800
		OG0001328	PF3D7_0818000							OG0003738	PF3D7_0932000	OG0003159	PVP01_1456400	PF3D7_1238300				OG0001330	PF3D7_0817700	OG0001632	PVP01_0933700	PF3D7_1132900		OG0000620	PVP01_1432200
		OG0004205	PF3D7_0322500							OG0001552	PF3D7_0932300	OG0003160	PVP01_1456500	PF3D7_1238400				OG0001328	PF3D7_0818000	OG0003782	PVP01_0939700	PF3D7_1138700		OG0003031	PVP01_1432400
		OG0000469	PF3D7_1118600							OG0001553	PF3D7_0932400	OG0004681	PVP01_1456600	PF3D7_1238500				OG0003584	PF3D7_0818300	OG0001587	PVP01_0944100	PF3D7_1143400		OG0003048	PVP01_1435100
		OG0003946	PF3D7_1425300							OG0000449	PF3D7_0932500	OG0004683	PVP01_1457900	PF3D7_1239800				OG0001326	PF3D7_0818400	OG0002233	PVP01_1105800	PF3D7_1366200		OG0004610	PVP01_1435200
		OG0002965	PF3D7_1320300							OG0001554	PF3D7_0932600	OG0003170	PVP01_1458000	PF3D7_1239900				OG0003582	PF3D7_0819000	OG0002220	PVP01_1107700	PF3D7_1364300		OG0004612	PVP01_1435400
		OG0001376	PF3D7_0418700							OG0003739	PF3D7_0932700	OG0003175	PVP01_1459000	PF3D7_1241900				OG0003577	PF3D7_0819700	OG0002162	PVP01_1118900	PF3D7_0630600		OG0004613	PVP01_1435500
		OG0001005	PF3D7_0903600							OG0001555	PF3D7_0932800	OG0003182	PVP01_1460600	PF3D7_1243500				OG0003576	PF3D7_0819800	OG0002161	PVP01_1119000	PF3D7_0630500		OG0004614	PVP01_1435800
		OG0001000	PF3D7_0904300							OG0000450	PF3D7_0933000	OG0000645	PVP01_1460700	PF3D7_1243600				OG0001320	PF3D7_0820200	OG0004817	PVP01_1133700	PF3D7_0615400		OG0003051	PVP01_1436200
		OG0003921	PF3D7_1433700							OG0003740	PF3D7_0933100	OG0003185	PVP01_1461000	PF3D7_1243900				OG0003574	PF3D7_0820300	OG0004505	PVP01_1205800	PF3D7_1349000		OG0004617	PVP01_1436800
		OG0003774	PF3D7_1140800							OG0001556	PF3D7_0933200	OG0003187	PVP01_1461200	PF3D7_1244100				OG0001318	PF3D7_0820500	OG0000586	PVP01_1226100	PF3D7_1328300		OG0003055	PVP01_1436900
		OG0002291	PF3D7_1008400							OG0003745	PF3D7_0934400	OG0004693	PVP01_1461500	PF3D7_1244400				OG0001317	PF3D7_0820600	OG0002684	PVP01_1238600	PF3D7_1468200		OG0003056	PVP01_1437000
		OG0003373	PF3D7_0306100							OG0003747	PF3D7_0934900	OG0003189	PVP01_1461700	PF3D7_1244600				OG0001316	PF3D7_0820700	OG0002644	PVP01_1246200	PF3D7_1460600		OG0004618	PVP01_1437100
		OG0001230	PF3D7_0720900							OG0001564	PF3D7_0935000	OG0003190	PVP01_1461800	PF3D7_1244700				OG0001315	PF3D7_0820800	OG0002582	PVP01_1257500	PF3D7_1449500		OG0003057	PVP01_1437200
		OG0003499	PF3D7_1205700							OG0001565	PF3D7_0935200	OG0003192	PVP01_1462100	PF3D7_1245000				OG0003573	PF3D7_0820900	OG0004333	PVP01_1258700	PF3D7_1448300		OG0000624	PVP01_1437400
		OG0003725	PF3D7_0929300							OG0002261	PF3D7_1003600	OG0003197	PVP01_1462800	PF3D7_1245800				OG0004781	PF3D7_0821000	OG0002571	PVP01_1259100	PF3D7_1447900		OG0004620	PVP01_1437700
		OG0003754	PF3D7_1146700							OG0002262	PF3D7_1003700	OG0003199	PVP01_1463400	PF3D7_1246300				OG0001312	PF3D7_0821600	OG0002566	PVP01_1259800	PF3D7_1447200		OG0003060	PVP01_1437800
		OG0001239	PF3D7_0722500							OG0002263	PF3D7_1004000	OG0000267	PVP01_1463500	PF3D7_1246400				OG0001310	PF3D7_0821800	OG0002559	PVP01_1261100	PF3D7_1445900		OG0000625	PVP01_1438000
		OG0000521	PF3D7_1357500							OG0002264	PF3D7_1004200	OG0000647	PVP01_1464000	PF3D7_1246900				OG0001307	PF3D7_0822100	OG0003513	PVP01_1309400	PF3D7_1210200		OG0000627	PVP01_1439300
		OG0001833	PF3D7_0409700							OG0002266	PF3D7_1004400	OG0003203	PVP01_1464200	PF3D7_1247100				OG0001306	PF3D7_0822200	OG0003950	PVP01_1325900	PF3D7_1423100		OG0004625	PVP01_1440200
		OG0001730	PF3D7_1117100							OG0004164	PF3D7_1004600	OG0003207	PVP01_1464600	PF3D7_1247500				OG0001303	PF3D7_0822600	OG0003997	PVP01_1340800	PF3D7_1408200		OG0005011	PVP01_1440300
		OG0001372	PF3D7_0418100							OG0002267	PF3D7_1004700	OG0003211	PVP01_1465600	PF3D7_1248500				OG0000254	PF3D7_0822700	OG0002956	PVP01_1419600	PF3D7_1318700		OG0003076	PVP01_1440500
		OG0002797	PF3D7_1340600							OG0002268	PF3D7_1004800	OG0000648	PVP01_1465800	PF3D7_1248700				OG0003565	PF3D7_0824000	OG0002962	PVP01_1420800	PF3D7_1320000		OG0003078	PVP01_1440800
		OG0003288	PF3D7_0106500							OG0002269	PF3D7_1004900	OG0004835	PVP01_1466700	PF3D7_1249600				OG0001294	PF3D7_0824300	OG0004579	PVP01_1424300	PF3D7_0715200		OG0000628	PVP01_1440900
		OG0004529	PF3D7_1306500							OG0002270	PF3D7_1005100	OG0003216	PVP01_1466900	PF3D7_1249800				OG0001293	PF3D7_0824400	OG0002995	PVP01_1426300	PF3D7_0814000		OG0004629	PVP01_1441200
		OG0003667	PF3D7_0911800							OG0000530	PF3D7_1005500	OG0003223	PVP01_1468000	PF3D7_1250900				OG0003563	PF3D7_0824900	OG0003087	PVP01_1442500	PF3D7_1224300		OG0000629	PVP01_1441300
		OG0001554	PF3D7_0932600							OG0002271	PF3D7_1005600	OG0004712	PVP01_1468200	PF3D7_1251100				OG0001288	PF3D7_0825300	OG0004660	PVP01_1450700	PF3D7_1232500		OG0003080	PVP01_1441500
		OG0002076	PF3D7_0514100							OG0002272	PF3D7_1005900	OG0004714	PVP01_1468700	PF3D7_1251600				OG0001283	PF3D7_0825800	OG0004661	PVP01_1450800	PF3D7_1232600		OG0003081	PVP01_1441600
		OG0004263	PF3D7_0523200							OG0002273	PF3D7_1006000	OG0004715	PVP01_1468900	PF3D7_1251800				OG0003560	PF3D7_0826900	OG0003135	PVP01_1451900	PF3D7_1233800		OG0004632	PVP01_1442400
		OG0002645	PF3D7_1460700							OG0002276	PF3D7_1006400	OG0001388	PVP01_0104800	PF3D7_0704600				OG0000415	PF3D7_0827100	OG0004669	PVP01_1453300	PF3D7_1235200		OG0003105	PVP01_1445900
		OG0003814	PF3D7_1129600							OG0004170	PF3D7_1006500	OG0001394	PVP01_0106200	PF3D7_0706000				OG0003559	PF3D7_0827300	OG0003229	PVP01_API02800	PF3D7_API02900		OG0003115	PVP01_1447500
		OG0001269	PF3D7_0828200							OG0002277	PF3D7_1006600	OG0002361	PVP01_0109400	PF3D7_0709100				OG0000209	PF3D7_0827900	OG0002364	PVP01_0110300	PF3D7_0709900		OG0004655	PVP01_1449600
		OG0003993	PF3D7_1410100							OG0002278	PF3D7_1006700	OG0002383	PVP01_0114200	PF3D7_0806300				OG0003557	PF3D7_0828100	OG0000767	PVP01_0206100	PF3D7_0109000		OG0004656	PVP01_1449800
		OG0002384	PF3D7_0806200							OG0002281	PF3D7_1007000	OG0000542	PVP01_0117000	PF3D7_0803200				OG0001269	PF3D7_0828200	OG0003905	PVP01_0307400	PF3D7_0408100		OG0003134	PVP01_1451500
		OG0002760	PF3D7_1331700							OG0004172	PF3D7_1007800	OG0002405	PVP01_0118000	PF3D7_0802200				OG0001266	PF3D7_0828500	OG0001206	PVP01_0313100	PF3D7_0717300		OG0003141	PVP01_1453000
		OG0002161	PF3D7_0630500							OG0004173	PF3D7_1008200	OG0000543	PVP01_0118100	PF3D7_0802100				OG0001265	PF3D7_0828600	OG0000902	PVP01_0406300	PF3D7_0218700		OG0004668	PVP01_1453200
		OG0004670	PF3D7_1235400							OG0002291	PF3D7_1008400	OG0000226	PVP01_0207400	PF3D7_0107500				OG0000414	PF3D7_0828900	OG0000859	PVP01_0414900	PF3D7_0210000		OG0004672	PVP01_1454200
		OG0000956	PF3D7_0309800							OG0000531	PF3D7_1008700	OG0000777	PVP01_0208000	PF3D7_0106800				OG0001262	PF3D7_0829000	OG0001360	PVP01_0522400	PF3D7_0415900		OG0003149	PVP01_1454400
		OG0004095	PF3D7_0626000							OG0000533	PF3D7_1009700	OG0003882	PVP01_0302900	PF3D7_0403600				OG0001259	PF3D7_0829300	OG0003460	PVP01_0616200	PF3D7_1031100		OG0000641	PVP01_1454700
		OG0002823	PF3D7_1344800							OG0004176	PF3D7_1009800	OG0004794	PVP01_0304700	PF3D7_0405300				OG0000293	PF3D7_0829400	OG0001503	PVP01_0721100	PF3D7_0922600		OG0003152	PVP01_1455000
		OG0004455	PF3D7_1333500							OG0004177	PF3D7_1009900	OG0003904	PVP01_0307300	PF3D7_0408000				OG0004962	PF3D7_0829600	OG0002275	PVP01_0805900	PF3D7_1006200		OG0003155	PVP01_1455500
		OG0001315	PF3D7_0820800							OG0002302	PF3D7_1010700	OG0003525	PVP01_0310100	PF3D7_0410800				OG0004965	PF3D7_0902900	OG0002292	PVP01_0808200	PF3D7_1008500		OG0004677	PVP01_1455600
		OG0004650	PF3D7_1229800							OG0004181	PF3D7_1010900	OG0001205	PVP01_0312900	PF3D7_0717100				OG0001006	PF3D7_0903400	OG0002293	PVP01_0808500	PF3D7_1008800		OG0004679	PVP01_1456000
		OG0003042	PF3D7_1215300							OG0002306	PF3D7_1011300	OG0003547	PVP01_0317900	PF3D7_0722200				OG0001005	PF3D7_0903600	OG0003378	PVP01_0831100	PF3D7_0309100		OG0004922	PVP01_1456100
		OG0002080	PF3D7_0515300							OG0000535	PF3D7_1011600	OG0003552	PVP01_0320200	PF3D7_0724500				OG0001004	PF3D7_0903900	OG0001624	PVP01_0935300	PF3D7_1134500		OG0003158	PVP01_1456200
		OG0002362	PF3D7_0709300							OG0004183	PF3D7_1011900	OG0003553	PVP01_0320300	PF3D7_0724600				OG0001003	PF3D7_0904000	OG0002495	PVP01_1005700	PF3D7_0528100		OG0004680	PVP01_1456300
		OG0000976	PF3D7_0313700							OG0002311	PF3D7_1012000	OG0003555	PVP01_0321100	PF3D7_0725400				OG0001002	PF3D7_0904100	OG0000718	PVP01_1139900	PF3D7_0609000		OG0003159	PVP01_1456400
		OG0001143	PF3D7_1204300							OG0004184	PF3D7_1012200	OG0003349	PVP01_0410200	PF3D7_0214700				OG0001000	PF3D7_0904300	OG0003249	PVP01_1145800	PF3D7_0603100		OG0003163	PVP01_1457000
		OG0003624	PF3D7_0703900							OG0002313	PF3D7_1012300	OG0003344	PVP01_0411300	PF3D7_0213600				OG0000997	PF3D7_0904600	OG0002758	PVP01_1223200	PF3D7_1331400		OG0003164	PVP01_1457100
		OG0002568	PF3D7_1447500							OG0002319	PF3D7_1013100	OG0000375	PVP01_0413500	PF3D7_0211500				OG0003410	PF3D7_0904700	OG0004445	PVP01_1224700	PF3D7_1329800		OG0004683	PVP01_1457900
		OG0002483	PF3D7_0525500							OG0002321	PF3D7_1013500	OG0000370	PVP01_0420600	PF3D7_0204500				OG0000388	PF3D7_0904900	OG0004990	PVP01_1244400	PF3D7_1462400		OG0003170	PVP01_1458000
		OG0004572	PF3D7_1321300							OG0002324	PF3D7_1014300	OG0003312	PVP01_0422100	PF3D7_0203000				OG0000387	PF3D7_0905200	OG0002617	PVP01_1251100	PF3D7_1455800		OG0004685	PVP01_1458600
		OG0004323	PF3D7_1444500							OG0004193	PF3D7_1014900	OG0001275	PVP01_0507600	PF3D7_0826700				OG0003407	PF3D7_0905400	OG0004994	PVP01_1264300	PF3D7_1442700		OG0003174	PVP01_1458900
		OG0002276	PF3D7_1006400							OG0005076	PF3D7_1016800	OG0001380	PVP01_0529000	PF3D7_0419600				OG0000992	PF3D7_0905900	OG0004997	PVP01_1300600	PF3D7_1201300		OG0003175	PVP01_1459000
		OG0004574	PF3D7_0713500							OG0000389	PF3D7_1017300	OG0001129	PVP01_0532000	PF3D7_0423500				OG0000989	PF3D7_0906400	OG0001175	PVP01_1309100	PF3D7_1210000		OG0003177	PVP01_1459600
		OG0002280	PF3D7_1006900							OG0001013	PF3D7_1017400	OG0001015	PVP01_0603200	PF3D7_1018000				OG0004966	PF3D7_0906700	OG0003912	PVP01_1313200	PF3D7_1436300		OG0003182	PVP01_1460600
		OG0001148	PF3D7_1205100							OG0003415	PF3D7_1017600	OG0003417	PVP01_0603300	PF3D7_1018100				OG0004782	PF3D7_0906890	OG0001925	PVP01_1331200	PF3D7_1417700		OG0000645	PVP01_1460700
		OG0001004	PF3D7_0903900							OG0003416	PF3D7_1017800	OG0001031	PVP01_0606100	PF3D7_1020900				OG0001420	PF3D7_0906910	OG0001928	PVP01_1331900	PF3D7_1417000		OG0003185	PVP01_1461000
		OG0004336	PF3D7_1450400							OG0001014	PF3D7_1017900	OG0003432	PVP01_0607500	PF3D7_1022300				OG0003654	PF3D7_0907100	OG0003062	PVP01_1438100	PF3D7_1219700		OG0003187	PVP01_1461200
		OG0002954	PF3D7_1318400							OG0003418	PF3D7_1018200	OG0001051	PVP01_0610200	PF3D7_1025000				OG0001422	PF3D7_0907600	OG0003086	PVP01_1442300	PF3D7_1224100		OG0003190	PVP01_1461800
		OG0003898	PF3D7_0406900							OG0001016	PF3D7_1018300	OG0003453	PVP01_0613800	PF3D7_1028700				OG0001423	PF3D7_0907700	OG0003092	PVP01_1443100	PF3D7_1224900		OG0003197	PVP01_1462800
		OG0002031	PF3D7_0505600							OG0003420	PF3D7_1018800	OG0001075	PVP01_0615200	PF3D7_1030100				OG0001425	PF3D7_0907900	OG0000634	PVP01_1449300	PF3D7_1231100		OG0003199	PVP01_1463400
		OG0002514	PF3D7_1475700							OG0003421	PF3D7_1018900	OG0001081	PVP01_0615900	PF3D7_1030800				OG0003656	PF3D7_0908100					OG0000267	PVP01_1463500
		OG0001867	PF3D7_1431600							OG0001019	PF3D7_1019000	OG0002282	PVP01_0806800	PF3D7_1007100				OG0003657	PF3D7_0908200					OG0000647	PVP01_1464000
		OG0002414	PF3D7_0614700							OG0003422	PF3D7_1019100	OG0002287	PVP01_0807400	PF3D7_1007700				OG0004909	PF3D7_0908500					OG0004862	PVP01_1464100
		OG0003271	PF3D7_0612200							OG0000229	PF3D7_1019300	OG0004203	PVP01_0817500	PF3D7_0322700				OG0001429	PF3D7_0908800					OG0003203	PVP01_1464200
		OG0003192	PF3D7_1245000							OG0001021	PF3D7_1019600	OG0002342	PVP01_0818300	PF3D7_0321900				OG0003658	PF3D7_0908900					OG0003211	PVP01_1465600
		OG0005126	PF3D7_1243400							OG0003423	PF3D7_1019700	OG0000379	PVP01_0832800	PF3D7_0307400				OG0000431	PF3D7_0909000					OG0000648	PVP01_1465800
		OG0001695	PF3D7_1122600							OG0001022	PF3D7_1019800	OG0003369	PVP01_0835400	PF3D7_0304800				OG0001430	PF3D7_0909200					OG0003214	PVP01_1466400
		OG0003011	PF3D7_0812000							OG0001024	PF3D7_1020000	OG0001773	PVP01_0909500	PF3D7_1108700				OG0001432	PF3D7_0909700					OG0003216	PVP01_1466900
		OG0004378	PF3D7_1463000							OG0003424	PF3D7_1020200	OG0003844	PVP01_0917400	PF3D7_1116800				OG0004910	PF3D7_0910500					OG0003221	PVP01_1467700
		OG0003401	PF3D7_0316200							OG0001026	PF3D7_1020300	OG0001722	PVP01_0919100	PF3D7_1118500				OG0001443	PF3D7_0911000					OG0004711	PVP01_1467800
		OG0004037	PF3D7_0509600							OG0001027	PF3D7_1020400	OG0001677	PVP01_0925200	PF3D7_1124600				OG0001444	PF3D7_0911100					OG0003223	PVP01_1468000
		OG0004025	PF3D7_0505200							OG0001028	PF3D7_1020500	OG0001632	PVP01_0933700	PF3D7_1132900				OG0003663	PF3D7_0911200					OG0004712	PVP01_1468200
		OG0003783	PF3D7_1138000							OG0003425	PF3D7_1020600	OG0003782	PVP01_0939700	PF3D7_1138700				OG0003664	PF3D7_0911300					OG0004715	PVP01_1468900
		OG0001632	PF3D7_1132900							OG0001029	PF3D7_1020700	OG0001587	PVP01_0944100	PF3D7_1143400				OG0003665	PF3D7_0911400					OG0000650	PVP01_MIT02700
		OG0002266	PF3D7_1004400							OG0001030	PF3D7_1020800	OG0000453	PVP01_0947800	PF3D7_1147200				OG0003666	PF3D7_0911600					OG0004850	PVP01_MIT03300
		OG0003763	PF3D7_1143600							OG0001032	PF3D7_1021000	OG0000555	PVP01_1005400	PF3D7_0528400				OG0001446	PF3D7_0911700					OG0002358	PVP01_0109100
		OG0001927	PF3D7_1417500							OG0003428	PF3D7_1021500	OG0002435	PVP01_1016600	PF3D7_0517400				OG0001447	PF3D7_0912100					OG0002361	PVP01_0109400
		OG0000600	PF3D7_1348700							OG0003429	PF3D7_1021700	OG0002233	PVP01_1105800	PF3D7_1366200				OG0001448	PF3D7_0912200					OG0000542	PVP01_0117000
		OG0004663	PF3D7_1233400							OG0001034	PF3D7_1021900	OG0002220	PVP01_1107700	PF3D7_1364300				OG0001449	PF3D7_0912400					OG0002405	PVP01_0118000
		OG0002696	PF3D7_1470600							OG0001035	PF3D7_1022000	OG0002162	PVP01_1118900	PF3D7_0630600				OG0001457	PF3D7_0913500					OG0000543	PVP01_0118100
		OG0001628	PF3D7_1133800							OG0003431	PF3D7_1022200	OG0002161	PVP01_1119000	PF3D7_0630500				OG0001458	PF3D7_0913700					OG0000226	PVP01_0207400
		OG0002792	PF3D7_1338800							OG0001040	PF3D7_1022800	OG0002156	PVP01_1119700	PF3D7_0629800				OG0003674	PF3D7_0913900					OG0000777	PVP01_0208000
		OG0002740	PF3D7_1326400							OG0000393	PF3D7_1023000	OG0004090	PVP01_1124600	PF3D7_0624900				OG0001459	PF3D7_0914000					OG0003882	PVP01_0302900
		OG0001606	PF3D7_1139300							OG0000154	PF3D7_1023100	OG0002093	PVP01_1131700	PF3D7_0617800				OG0000295	PF3D7_0915400					OG0004794	PVP01_0304700
		OG0004031	PF3D7_0507300							OG0001043	PF3D7_1023300	OG0004065	PVP01_1132400	PF3D7_0616700				OG0001470	PF3D7_0916200					OG0003904	PVP01_0307300
		OG0002135	PF3D7_0626300							OG0001044	PF3D7_1023600	OG0004062	PVP01_1132800	PF3D7_0616300				OG0001474	PF3D7_0916900					OG0003525	PVP01_0310100
		OG0004547	PF3D7_1310400							OG0003438	PF3D7_1024000	OG0004817	PVP01_1133700	PF3D7_0615400				OG0003687	PF3D7_0917400					OG0001205	PVP01_0312900
		OG0003977	PF3D7_1414200							OG0001049	PF3D7_1024700	OG0002849	PVP01_1203800	PF3D7_1351000				OG0001479	PF3D7_0918000					OG0001217	PVP01_0314700
		OG0000989	PF3D7_0906400							OG0003442	PF3D7_1024800	OG0000586	PVP01_1226100	PF3D7_1328300				OG0000256	PF3D7_0918600					OG0000231	PVP01_0314900
		OG0002560	PF3D7_1446100							OG0001053	PF3D7_1025300	OG0000580	PVP01_1230900	PF3D7_1323700				OG0001482	PF3D7_0918800					OG0003547	PVP01_0317900
		OG0000555	PF3D7_0528400							OG0003444	PF3D7_1025400	OG0002710	PVP01_1233400	PF3D7_1473400				OG0001486	PF3D7_0919200					OG0003552	PVP01_0320200
		OG0004886	PF3D7_1203400							OG0003445	PF3D7_1025500	OG0004409	PVP01_1234300	PF3D7_1472500				OG0001487	PF3D7_0919300					OG0003555	PVP01_0321100
		OG0000866	PF3D7_0211800							OG0001054	PF3D7_1025600	OG0004405	PVP01_1235700	PF3D7_1471100				OG0003693	PF3D7_0919900					OG0000904	PVP01_0405400
		OG0004232	PF3D7_0807400							OG0001057	PF3D7_1025900	OG0002684	PVP01_1238600	PF3D7_1468200				OG0001491	PF3D7_0920000					OG0000370	PVP01_0420600
		OG0004440	PF3D7_1328600							OG0003447	PF3D7_1026100	OG0002644	PVP01_1246200	PF3D7_1460600				OG0001493	PF3D7_0920500					OG0003316	PVP01_0420800
		OG0001763	PF3D7_1110700							OG0003448	PF3D7_1026300	OG0002594	PVP01_1255700	PF3D7_1451300				OG0003696	PF3D7_0920600					OG0001275	PVP01_0507600
		OG0003906	PF3D7_0408200							OG0001059	PF3D7_1026800	OG0002582	PVP01_1257500	PF3D7_1449500				OG0003699	PF3D7_0921200					OG0003568	PVP01_0511400
		OG0001683	PF3D7_1124000							OG0003449	PF3D7_1027000	OG0004333	PVP01_1258700	PF3D7_1448300				OG0003702	PF3D7_0921600					OG0000423	PVP01_0520700
		OG0003534	PF3D7_0716700							OG0001060	PF3D7_1027100	OG0002571	PVP01_1259100	PF3D7_1447900				OG0001496	PF3D7_0921700					OG0001380	PVP01_0529000
		OG0003915	PF3D7_1435600							OG0001063	PF3D7_1027600	OG0002566	PVP01_1259800	PF3D7_1447200				OG0003705	PF3D7_0922800					OG0001129	PVP01_0532000
		OG0003400	PF3D7_0315900							OG0001067	PF3D7_1028100	OG0002559	PVP01_1261100	PF3D7_1445900				OG0001505	PF3D7_0922900					OG0003417	PVP01_0603300
		OG0003183	PF3D7_1243700							OG0001068	PF3D7_1028300	OG0004315	PVP01_1264400	PF3D7_1442600				OG0003707	PF3D7_0923400					OG0001017	PVP01_0603700
		OG0002468	PF3D7_0522600							OG0001069	PF3D7_1028400	OG0003950	PVP01_1325900	PF3D7_1423100				OG0003708	PF3D7_0924100					OG0001031	PVP01_0606100
		OG0001240	PF3D7_0722600							OG0001070	PF3D7_1028800	OG0001927	PVP01_1331400	PF3D7_1417500				OG0003709	PF3D7_0924400					OG0001041	PVP01_0608100
		OG0003341	PF3D7_0213000							OG0003454	PF3D7_1028900	OG0003997	PVP01_1340800	PF3D7_1408200				OG0001515	PF3D7_0924500					OG0003453	PVP01_0613800
		OG0002347	PF3D7_0320800							OG0003455	PF3D7_1029200	OG0004002	PVP01_1343100	PF3D7_1405700				OG0003710	PF3D7_0924600					OG0003456	PVP01_0614600
		OG0004642	PF3D7_1227300							OG0001071	PF3D7_1029300	OG0004010	PVP01_1345200	PF3D7_1403600				OG0001516	PF3D7_0924700					OG0001081	PVP01_0615900
		OG0002809	PF3D7_1342400							OG0001073	PF3D7_1029800	OG0004519	PVP01_1403400	PF3D7_1302500				OG0001517	PF3D7_0924800					OG0001115	PVP01_0622100
		OG0000784	PF3D7_0105900							OG0003458	PF3D7_1029900	OG0000329	PVP01_1412800	PF3D7_1311800				OG0004911	PF3D7_0924900					OG0004967	PVP01_0706000
		OG0002789	PF3D7_1338400							OG0001080	PF3D7_1030600	OG0002956	PVP01_1419600	PF3D7_1318700				OG0003713	PF3D7_0925300					OG0001440	PVP01_0709200
		OG0002710	PF3D7_1473400							OG0003461	PF3D7_1031300	OG0002962	PVP01_1420800	PF3D7_1320000				OG0001520	PF3D7_0925700					OG0001530	PVP01_0725800
		OG0003040	PF3D7_1215100							OG0001086	PF3D7_1031800	OG0004579	PVP01_1424300	PF3D7_0715200				OG0001521	PF3D7_0925800					OG0001532	PVP01_0726100
		OG0004230	PF3D7_0808000							OG0003462	PF3D7_1031900	OG0003087	PVP01_1442500	PF3D7_1224300				OG0003716	PF3D7_0926000					OG0002258	PVP01_0803100
		OG0003850	PF3D7_1113800							OG0003463	PF3D7_1032100	OG0000630	PVP01_1444000	PF3D7_1225800				OG0001522	PF3D7_0926100					OG0002282	PVP01_0806800
		OG0002043	PF3D7_0507700							OG0001088	PF3D7_1032300	OG0004660	PVP01_1450700	PF3D7_1232500				OG0000442	PF3D7_0926300					OG0004811	PVP01_0809900
		OG0000856	PF3D7_0209400							OG0001091	PF3D7_1032700	OG0004661	PVP01_1450800	PF3D7_1232600				OG0003717	PF3D7_0926400					OG0004203	PVP01_0817500
		OG0004408	PF3D7_1472400							OG0003466	PF3D7_1032900	OG0003135	PVP01_1451900	PF3D7_1233800				OG0001524	PF3D7_0926500					OG0002342	PVP01_0818300
		OG0001229	PF3D7_0720800							OG0001095	PF3D7_1033500	OG0004669	PVP01_1453300	PF3D7_1235200				OG0001525	PF3D7_0926700					OG0000379	PVP01_0832800
		OG0001254	PF3D7_0724700							OG0001099	PF3D7_1034000	OG0003146	PVP01_1454000	PF3D7_1235900				OG0003719	PF3D7_0926800					OG0000936	PVP01_0833700
		OG0002395	PF3D7_0803800							OG0003468	PF3D7_1034600	OG0003229	PVP01_API02800	PF3D7_API02900				OG0001529	PF3D7_0927200					OG0003369	PVP01_0835400
		OG0002945	PF3D7_1316900							OG0001108	PF3D7_1036600	OG0002364	PVP01_0110300	PF3D7_0709900				OG0001533	PF3D7_0927700					OG0000907	PVP01_0837800
		OG0000450	PF3D7_0933000							OG0004908	PF3D7_1037000	OG0000768	PVP01_0206200	PF3D7_0108800				OG0000443	PF3D7_0927900					OG0004892	PVP01_0913600
		OG0004242	PF3D7_0803500							OG0003470	PF3D7_1037400	OG0003905	PVP01_0307400	PF3D7_0408100				OG0001538	PF3D7_0928400					OG0001749	PVP01_0914000
		OG0004207	PF3D7_0322200							OG0001116	PF3D7_1037800	OG0001206	PVP01_0313100	PF3D7_0717300				OG0003722	PF3D7_0928500					OG0000475	PVP01_0914100
		OG0002220	PF3D7_1364300							OG0003471	PF3D7_1037900	OG0000902	PVP01_0406300	PF3D7_0218700				OG0003723	PF3D7_0928700					OG0005378	PVP01_0916450
		OG0002383	PF3D7_0806300							OG0001802	PF3D7_1103400	OG0001360	PVP01_0522400	PF3D7_0415900				OG0003724	PF3D7_0928800					OG0003844	PVP01_0917400
		OG0003797	PF3D7_1134300							OG0001799	PF3D7_1103800	OG0001378	PVP01_0528600	PF3D7_0419200				OG0001540	PF3D7_0929100					OG0001722	PVP01_0919100
		OG0002915	PF3D7_1312800							OG0003878	PF3D7_1104100	OG0003437	PVP01_0609000	PF3D7_1023800				OG0000445	PF3D7_0929200					OG0001718	PVP01_0919800
		OG0003418	PF3D7_1018200							OG0001795	PF3D7_1104600	OG0003460	PVP01_0616200	PF3D7_1031100				OG0003725	PF3D7_0929300					OG0001702	PVP01_0922100
		OG0001049	PF3D7_1024700							OG0004791	PF3D7_1105200	OG0001503	PVP01_0721100	PF3D7_0922600				OG0003726	PF3D7_0929400					OG0001677	PVP01_0925200
		OG0000591	PF3D7_1333400							OG0003874	PF3D7_1105500	OG0002275	PVP01_0805900	PF3D7_1006200				OG0001542	PF3D7_0929600					OG0001669	PVP01_0926200
		OG0004299	PF3D7_1438400							OG0003872	PF3D7_1105900	OG0002292	PVP01_0808200	PF3D7_1008500				OG0003728	PF3D7_0930100					OG0001632	PVP01_0933700
		OG0002313	PF3D7_1012300							OG0001790	PF3D7_1106000	OG0002293	PVP01_0808500	PF3D7_1008800				OG0003730	PF3D7_0930300					OG0001587	PVP01_0944100
		OG0000804	PF3D7_0727100							OG0001789	PF3D7_1106100	OG0003378	PVP01_0831100	PF3D7_0309100				OG0001545	PF3D7_0930500					OG0000552	PVP01_1007600
		OG0004702	PF3D7_1248400							OG0003871	PF3D7_1106200	OG0001624	PVP01_0935300	PF3D7_1134500				OG0001546	PF3D7_0930600					OG0004264	PVP01_1010400
		OG0001936	PF3D7_1415300							OG0001788	PF3D7_1106300	OG0002495	PVP01_1005700	PF3D7_0528100				OG0001549	PF3D7_0931600					OG0002053	PVP01_1023800
		OG0001823	PF3D7_0407900							OG0001787	PF3D7_1106600	OG0002478	PVP01_1008900	PF3D7_0524900				OG0003737	PF3D7_0931700					OG0002233	PVP01_1105800
		OG0001808	PF3D7_0404700							OG0001786	PF3D7_1106700	OG0004091	PVP01_1124300	PF3D7_0625200				OG0003738	PF3D7_0932000					OG0002162	PVP01_1118900
		OG0002525	PF3D7_1438700							OG0003868	PF3D7_1106800	OG0000718	PVP01_1139900	PF3D7_0609000				OG0001552	PF3D7_0932300					OG0002161	PVP01_1119000
		OG0000718	PF3D7_0609000							OG0001784	PF3D7_1107200	OG0003249	PVP01_1145800	PF3D7_0603100				OG0001554	PF3D7_0932600					OG0002156	PVP01_1119700
		OG0004084	PF3D7_0622700							OG0001779	PF3D7_1107700	OG0002758	PVP01_1223200	PF3D7_1331400				OG0003739	PF3D7_0932700					OG0002093	PVP01_1131700
		OG0001947	PF3D7_1414000							OG0000478	PF3D7_1107900	OG0004451	PVP01_1223400	PF3D7_1331200				OG0001555	PF3D7_0932800					OG0004065	PVP01_1132400
		OG0001920	PF3D7_1419700							OG0003865	PF3D7_1108100	OG0002753	PVP01_1224000	PF3D7_1330500				OG0000450	PF3D7_0933000					OG0004062	PVP01_1132800
		OG0002431	PF3D7_0516900							OG0001776	PF3D7_1108200	OG0004445	PVP01_1224700	PF3D7_1329800				OG0003740	PF3D7_0933100					OG0004817	PVP01_1133700
		OG0001368	PF3D7_0417500							OG0005025	PF3D7_1108300	OG0004990	PVP01_1244400	PF3D7_1462400				OG0001556	PF3D7_0933200					OG0000281	PVP01_1136100
		OG0000997	PF3D7_0904600							OG0001774	PF3D7_1108600	OG0004994	PVP01_1264300	PF3D7_1442700				OG0003745	PF3D7_0934400					OG0000688	PVP01_1144700
		OG0001759	PF3D7_1111200							OG0001771	PF3D7_1109400	OG0004997	PVP01_1300600	PF3D7_1201300				OG0003747	PF3D7_0934900					OG0004516	PVP01_1202500
		OG0004209	PF3D7_0321600							OG0001769	PF3D7_1110100	OG0001141	PVP01_1302800	PF3D7_1203500				OG0001564	PF3D7_0935000					OG0002849	PVP01_1203800
		OG0004344	PF3D7_1453200							OG0001768	PF3D7_1110200	OG0001175	PVP01_1309100	PF3D7_1210000				OG0001565	PF3D7_0935200					OG0002842	PVP01_1205100
		OG0002711	PF3D7_1473700							OG0001765	PF3D7_1110500	OG0003912	PVP01_1313200	PF3D7_1436300				OG0002261	PF3D7_1003600					OG0004505	PVP01_1205800
		OG0001593	PF3D7_1142100							OG0001764	PF3D7_1110600	OG0001925	PVP01_1331200	PF3D7_1417700				OG0002262	PF3D7_1003700					OG0002828	PVP01_1208600
		OG0002035	PF3D7_0506300							OG0001763	PF3D7_1110700	OG0001928	PVP01_1331900	PF3D7_1417000				OG0002263	PF3D7_1004000					OG0004478	PVP01_1212600
		OG0002572	PF3D7_1448000							OG0003860	PF3D7_1110800	OG0000496	PVP01_1333200	PF3D7_1415700				OG0002264	PF3D7_1004200					OG0000591	PVP01_1221300
		OG0003125	PF3D7_1230900							OG0001762	PF3D7_1110900	OG0001942	PVP01_1334200	PF3D7_1414700				OG0002266	PF3D7_1004400					OG0000586	PVP01_1226100
		OG0004198	PF3D7_0323800							OG0001759	PF3D7_1111200	OG0001945	PVP01_1334600	PF3D7_1414300				OG0004164	PF3D7_1004600					OG0000580	PVP01_1230900
		OG0002304	PF3D7_1011000							OG0003859	PF3D7_1111400	OG0003062	PVP01_1438100	PF3D7_1219700				OG0002267	PF3D7_1004700					OG0002710	PVP01_1233400
		OG0003343	PF3D7_0213500							OG0000476	PF3D7_1111600	OG0003086	PVP01_1442300	PF3D7_1224100				OG0002268	PF3D7_1004800					OG0004405	PVP01_1235700
		OG0002158	PF3D7_0630100							OG0001754	PF3D7_1112200	OG0003092	PVP01_1443100	PF3D7_1224900				OG0002269	PF3D7_1004900					OG0002684	PVP01_1238600
		OG0001685	PF3D7_1123800							OG0003855	PF3D7_1112300	OG0000634	PVP01_1449300	PF3D7_1231100				OG0002270	PF3D7_1005100					OG0002681	PVP01_1239100
		OG0002561	PF3D7_1446300							OG0001751	PF3D7_1113000							OG0002271	PF3D7_1005600					OG0004385	PVP01_1242000
		OG0003874	PF3D7_1105500							OG0001747	PF3D7_1113500							OG0002272	PF3D7_1005900					OG0002644	PVP01_1246200
		OG0000604	PF3D7_1303500							OG0001745	PF3D7_1113900							OG0002273	PF3D7_1006000					OG0004363	PVP01_1249100
		OG0002869	PF3D7_1304100							OG0001741	PF3D7_1114900							OG0004170	PF3D7_1006500					OG0002594	PVP01_1255700
		OG0003097	PF3D7_1226000							OG0001737	PF3D7_1115500							OG0002277	PF3D7_1006600					OG0004333	PVP01_1258700
		OG0002778	PF3D7_1336600							OG0003846	PF3D7_1116000							OG0002278	PF3D7_1006700					OG0002571	PVP01_1259100
		OG0003117	PF3D7_1229600							OG0000472	PF3D7_1116100							OG0004172	PF3D7_1007800					OG0002566	PVP01_1259800
		OG0002187	PF3D7_1358000							OG0000471	PF3D7_1116200							OG0004173	PF3D7_1008200					OG0002559	PVP01_1261100
		OG0001180	PF3D7_1211300							OG0003845	PF3D7_1116300							OG0002291	PF3D7_1008400					OG0004315	PVP01_1264400
		OG0000958	PF3D7_0310300							OG0001735	PF3D7_1116400							OG0000531	PF3D7_1008700					OG0002544	PVP01_1264700
		OG0003886	PF3D7_0404300							OG0001734	PF3D7_1116500							OG0000533	PF3D7_1009700					OG0004310	PVP01_1265900
		OG0002022	PF3D7_0504200							OG0001730	PF3D7_1117100							OG0004176	PF3D7_1009800					OG0003492	PVP01_1303100
		OG0004156	PF3D7_1369600							OG0001728	PF3D7_1117500							OG0004177	PF3D7_1009900					OG0003513	PVP01_1309400
		OG0000923	PF3D7_0304200							OG0001727	PF3D7_1117700							OG0002302	PF3D7_1010700					OG0001859	PVP01_1316500
		OG0002342	PF3D7_0321900							OG0001726	PF3D7_1117800							OG0004181	PF3D7_1010900					OG0001887	PVP01_1320800
		OG0003376	PF3D7_0307700							OG0003839	PF3D7_1118400							OG0002304	PF3D7_1011000					OG0003963	PVP01_1329600
		OG0003218	PF3D7_1250200							OG0000469	PF3D7_1118600							OG0000535	PF3D7_1011600					OG0001927	PVP01_1331400
		OG0003666	PF3D7_0911600							OG0003838	PF3D7_1118700							OG0004183	PF3D7_1011900					OG0005005	PVP01_1335600
		OG0000794	PF3D7_0103700							OG0001717	PF3D7_1119300							OG0002311	PF3D7_1012000					OG0004002	PVP01_1343100
		OG0002271	PF3D7_1005600							OG0001716	PF3D7_1119400							OG0004184	PF3D7_1012200					OG0004010	PVP01_1345200
		OG0005000	PF3D7_1436200							OG0001715	PF3D7_1119500							OG0002313	PF3D7_1012300					OG0000329	PVP01_1412800
		OG0002689	PF3D7_1469200							OG0001708	PF3D7_1120600							OG0002321	PF3D7_1013500					OG0004737	PVP01_1418100
		OG0003893	PF3D7_0405200							OG0001704	PF3D7_1121300							OG0004188	PF3D7_1013600					OG0002956	PVP01_1419600
		OG0004285	PF3D7_0529800							OG0001703	PF3D7_1121400							OG0004189	PF3D7_1013700					OG0002962	PVP01_1420800
		OG0003838	PF3D7_1118700							OG0000259	PF3D7_1121700							OG0002324	PF3D7_1014300					OG0002967	PVP01_1421300
		OG0002648	PF3D7_1461100							OG0001697	PF3D7_1122200							OG0004193	PF3D7_1014900					OG0004579	PVP01_1424300
		OG0003969	PF3D7_1417300							OG0003830	PF3D7_1122400							OG0005076	PF3D7_1016800					OG0002995	PVP01_1426300
		OG0002811	PF3D7_1343200							OG0001695	PF3D7_1122600							OG0000389	PF3D7_1017300					OG0002999	PVP01_1426900
		OG0000938	PF3D7_0306800							OG0001690	PF3D7_1123200							OG0001013	PF3D7_1017400					OG0003087	PVP01_1442500
		OG0001343	PF3D7_0815800							OG0001689	PF3D7_1123300							OG0003415	PF3D7_1017600					OG0003089	PVP01_1442700
		OG0001972	PF3D7_1408700							OG0001688	PF3D7_1123400							OG0003416	PF3D7_1017800					OG0000630	PVP01_1444000
		OG0001534	PF3D7_0927800							OG0001685	PF3D7_1123800							OG0001014	PF3D7_1017900					OG0004660	PVP01_1450700
		OG0002817	PF3D7_1343900							OG0001683	PF3D7_1124000							OG0003418	PF3D7_1018200					OG0004661	PVP01_1450800
		OG0004965	PF3D7_0902900							OG0001682	PF3D7_1124100							OG0001016	PF3D7_1018300					OG0003135	PVP01_1451900
		OG0004958	PF3D7_0202400							OG0001676	PF3D7_1124700							OG0003420	PF3D7_1018800					OG0004669	PVP01_1453300
		OG0004013	PF3D7_1403000							OG0001675	PF3D7_1124800							OG0003421	PF3D7_1018900					OG0003146	PVP01_1454000
		OG0004443	PF3D7_1329500							OG0001674	PF3D7_1124900							OG0001019	PF3D7_1019000					OG0003171	PVP01_1458100
		OG0002862	PF3D7_1302800							OG0001673	PF3D7_1125000							OG0003422	PF3D7_1019100					OG0000333	PVP01_1458800
		OG0004139	PF3D7_1364200							OG0001672	PF3D7_1125100							OG0000229	PF3D7_1019300					OG0004698	PVP01_1462900
		OG0003954	PF3D7_1421800							OG0003827	PF3D7_1125200							OG0001021	PF3D7_1019600					OG0005127	PVP01_1463300
		OG0003204	PF3D7_1247200							OG0001671	PF3D7_1125300							OG0003423	PF3D7_1019700					OG0003206	PVP01_1464500
		OG0000973	PF3D7_0312800							OG0003825	PF3D7_1125700							OG0001022	PF3D7_1019800					OG0000268	PVP01_1465300
		OG0004962	PF3D7_0829600							OG0001668	PF3D7_1125800							OG0001024	PF3D7_1020000					OG0001385	PVP01_0103300
		OG0003932	PF3D7_1429200							OG0003824	PF3D7_1126500							OG0001025	PF3D7_1020100					OG0004815	PVP01_0113700
		OG0002399	PF3D7_0803100							OG0003823	PF3D7_1126700							OG0003424	PF3D7_1020200					OG0000767	PVP01_0206100
		OG0000542	PF3D7_0803200							OG0003820	PF3D7_1127500							OG0001027	PF3D7_1020400					OG0000768	PVP01_0206200
		OG0001317	PF3D7_0820600							OG0000467	PF3D7_1128500							OG0001028	PF3D7_1020500					OG0001206	PVP01_0313100
		OG0000500	PF3D7_1408400							OG0001651	PF3D7_1129200							OG0003425	PF3D7_1020600					OG0001243	PVP01_0318600
		OG0000682	PF3D7_0603400							OG0000465	PF3D7_1129300							OG0001029	PF3D7_1020700					OG0000902	PVP01_0406300
		OG0004893	PF3D7_0518700							OG0001649	PF3D7_1129500							OG0001030	PF3D7_1020800					OG0000859	PVP01_0414900
		OG0003338	PF3D7_0212400							OG0003814	PF3D7_1129600							OG0001032	PF3D7_1021000					OG0001299	PVP01_0510900
		OG0002016	PF3D7_0503000							OG0003813	PF3D7_1129800							OG0003428	PF3D7_1021500					OG0001378	PVP01_0528600
		OG0004458	PF3D7_1334000							OG0001647	PF3D7_1130000							OG0003429	PF3D7_1021700					OG0001379	PVP01_0528700
		OG0004136	PF3D7_1363100							OG0001646	PF3D7_1130100							OG0001034	PF3D7_1021900					OG0001503	PVP01_0721100
		OG0001193	PF3D7_0410900							OG0001645	PF3D7_1130200							OG0001035	PF3D7_1022000					OG0002275	PVP01_0805900
		OG0003603	PF3D7_0416900							OG0001644	PF3D7_1130500							OG0003431	PF3D7_1022200					OG0002285	PVP01_0807100
		OG0000809	PF3D7_0728100							OG0001643	PF3D7_1130600							OG0001040	PF3D7_1022800					OG0004187	PVP01_0813400
		OG0003930	PF3D7_1429900							OG0001642	PF3D7_1130700							OG0000393	PF3D7_1023000					OG0002329	PVP01_0815200
		OG0001799	PF3D7_1103800							OG0003812	PF3D7_1130900							OG0000154	PF3D7_1023100					OG0003378	PVP01_0831100
		OG0000972	PF3D7_0312400							OG0003808	PF3D7_1131400							OG0001043	PF3D7_1023300					OG0000947	PVP01_0832000
		OG0003543	PF3D7_0720700							OG0003807	PF3D7_1131500							OG0003438	PF3D7_1024000					OG0003786	PVP01_0938700
		OG0000984	PF3D7_0316100							OG0004974	PF3D7_1131600							OG0001049	PF3D7_1024700					OG0001584	PVP01_0944700
		OG0001357	PF3D7_0415400							OG0003806	PF3D7_1131700							OG0003442	PF3D7_1024800					OG0002492	PVP01_1006500
		OG0002827	PF3D7_1346100							OG0001637	PF3D7_1132100							OG0001053	PF3D7_1025300					OG0002478	PVP01_1008900
		OG0000282	PF3D7_0613300							OG0001636	PF3D7_1132200							OG0003444	PF3D7_1025400					OG0002475	PVP01_1009500
		OG0003209	PF3D7_1248100							OG0003803	PF3D7_1132500							OG0003445	PF3D7_1025500					OG0002057	PVP01_1023000
		OG0001951	PF3D7_1413400							OG0001634	PF3D7_1132600							OG0001054	PF3D7_1025600					OG0002178	PVP01_1115600
		OG0003808	PF3D7_1131400							OG0000463	PF3D7_1133200							OG0001057	PF3D7_1025900					OG0004091	PVP01_1124300
		OG0001945	PF3D7_1414300							OG0001630	PF3D7_1133500							OG0003447	PF3D7_1026100					OG0003249	PVP01_1145800
		OG0004637	PF3D7_1225600							OG0003800	PF3D7_1133600							OG0003448	PF3D7_1026300					OG0002758	PVP01_1223200
		OG0000817	PF3D7_0729400							OG0001629	PF3D7_1133700							OG0001059	PF3D7_1026800					OG0004451	PVP01_1223400
		OG0003023	PF3D7_0809400							OG0001628	PF3D7_1133800							OG0003449	PF3D7_1027000					OG0002753	PVP01_1224000
		OG0004425	PF3D7_1325800							OG0003799	PF3D7_1133900							OG0001060	PF3D7_1027100					OG0004445	PVP01_1224700
		OG0004206	PF3D7_0322400							OG0003798	PF3D7_1134200							OG0001063	PF3D7_1027600					OG0000577	PVP01_1238100
		OG0003429	PF3D7_1021700							OG0000241	PF3D7_1134600							OG0001067	PF3D7_1028100					OG0004393	PVP01_1239700
		OG0003176	PF3D7_1242200							OG0001617	PF3D7_1135900							OG0001068	PF3D7_1028300					OG0002617	PVP01_1251100
		OG0004032	PF3D7_0507400							OG0000461	PF3D7_1136200							OG0001069	PF3D7_1028400					OG0002613	PVP01_1251700
		OG0001086	PF3D7_1031800							OG0001616	PF3D7_1136300							OG0001070	PF3D7_1028800					OG0004337	PVP01_1256000
		OG0000954	PF3D7_0309600							OG0000460	PF3D7_1136700							OG0003454	PF3D7_1028900					OG0004997	PVP01_1300600
		OG0004911	PF3D7_0924900							OG0001615	PF3D7_1136800							OG0003455	PF3D7_1029200					OG0004919	PVP01_1305200
		OG0000713	PF3D7_0607700							OG0000459	PF3D7_1137300							OG0001071	PF3D7_1029300					OG0000408	PVP01_1307500
		OG0003625	PF3D7_0704000							OG0003788	PF3D7_1137400							OG0001073	PF3D7_1029800					OG0001175	PVP01_1309100
		OG0004654	PF3D7_1231200							OG0001611	PF3D7_1137500							OG0003458	PF3D7_1029900					OG0003514	PVP01_1309500
		OG0001390	PF3D7_0705300							OG0003784	PF3D7_1137900							OG0001080	PF3D7_1030600					OG0000290	PVP01_1311200
		OG0000361	PF3D7_0109100							OG0003783	PF3D7_1138000							OG0003461	PF3D7_1031300					OG0003912	PVP01_1313200
		OG0003747	PF3D7_0934900							OG0004788	PF3D7_1138300							OG0001086	PF3D7_1031800					OG0001928	PVP01_1331900
		OG0003638	PF3D7_0707300							OG0001607	PF3D7_1139100							OG0003462	PF3D7_1031900					OG0002001	PVP01_1346400
		OG0003693	PF3D7_0919900							OG0001606	PF3D7_1139300							OG0003463	PF3D7_1032100					OG0002961	PVP01_1420400
		OG0001915	PF3D7_1420600							OG0001605	PF3D7_1139500							OG0001088	PF3D7_1032300					OG0004594	PVP01_1429600
		OG0003651	PF3D7_0317200							OG0001604	PF3D7_1139700							OG0001091	PF3D7_1032700					OG0003038	PVP01_1433500
		OG0001437	PF3D7_0910300							OG0003779	PF3D7_1139800							OG0003466	PF3D7_1032900					OG0003058	PVP01_1437300
		OG0002248	PF3D7_1368700							OG0001603	PF3D7_1139900							OG0001095	PF3D7_1033500					OG0003062	PVP01_1438100
		OG0004123	PF3D7_1359500							OG0003776	PF3D7_1140600							OG0001099	PF3D7_1034000					OG0003086	PVP01_1442300
		OG0003470	PF3D7_1037400							OG0003774	PF3D7_1140800							OG0001108	PF3D7_1036600
		OG0000449	PF3D7_0932500							OG0003772	PF3D7_1141400							OG0004908	PF3D7_1037000
		OG0000235	PF3D7_0509800							OG0003770	PF3D7_1141900							OG0001116	PF3D7_1037800
		OG0004011	PF3D7_1403500							OG0001593	PF3D7_1142100							OG0003471	PF3D7_1037900
		OG0003498	PF3D7_1205400							OG0003767	PF3D7_1142500							OG0001802	PF3D7_1103400
		OG0002415	PF3D7_0614800							OG0001590	PF3D7_1142600							OG0001799	PF3D7_1103800
		OG0004258	PF3D7_0521900							OG0000457	PF3D7_1143000							OG0003878	PF3D7_1104100
		OG0004434	PF3D7_1327000							OG0001589	PF3D7_1143100							OG0001795	PF3D7_1104600
		OG0000388	PF3D7_0904900							OG0001588	PF3D7_1143300							OG0004791	PF3D7_1105200
		OG0004611	PF3D7_1216500							OG0003764	PF3D7_1143500							OG0001793	PF3D7_1105400
		OG0000778	PF3D7_0106700							OG0003763	PF3D7_1143600							OG0003874	PF3D7_1105500
		OG0002849	PF3D7_1351000							OG0003762	PF3D7_1143700							OG0003872	PF3D7_1105900
		OG0000759	PF3D7_0110100							OG0001586	PF3D7_1143800							OG0001789	PF3D7_1106100
		OG0000413	PF3D7_0725000							OG0001585	PF3D7_1143900							OG0003871	PF3D7_1106200
		OG0002816	PF3D7_1343800							OG0001583	PF3D7_1144100							OG0001788	PF3D7_1106300
		OG0003150	PF3D7_1236700							OG0001579	PF3D7_1144700							OG0003869	PF3D7_1106500
		OG0004813	PF3D7_0710000							OG0000455	PF3D7_1145400							OG0001787	PF3D7_1106600
		OG0002618	PF3D7_1455900							OG0004787	PF3D7_1145900							OG0001786	PF3D7_1106700
		OG0004452	PF3D7_1331500							OG0003756	PF3D7_1146200							OG0003868	PF3D7_1106800
		OG0004133	PF3D7_1362800							OG0001572	PF3D7_1146500							OG0001784	PF3D7_1107200
		OG0003101	PF3D7_1226800							OG0003754	PF3D7_1146700							OG0001779	PF3D7_1107700
		OG0000553	PF3D7_0526500							OG0001571	PF3D7_1146800							OG0000478	PF3D7_1107900
		OG0001117	PF3D7_0420100							OG0004998	PF3D7_1201400							OG0003865	PF3D7_1108100
		OG0002805	PF3D7_1341800							OG0003486	PF3D7_1201600							OG0005025	PF3D7_1108300
		OG0004163	PF3D7_1004500							OG0003487	PF3D7_1201700							OG0001774	PF3D7_1108600
		OG0002586	PF3D7_1450000							OG0001134	PF3D7_1202000							OG0001771	PF3D7_1109400
		OG0003454	PF3D7_1028900							OG0000404	PF3D7_1202500							OG0001769	PF3D7_1110100
		OG0004722	PF3D7_API03600							OG0003489	PF3D7_1202700							OG0001768	PF3D7_1110200
		OG0001883	PF3D7_1429300							OG0001138	PF3D7_1203000							OG0001765	PF3D7_1110500
		OG0000704	PF3D7_0606700							OG0003491	PF3D7_1203100							OG0001764	PF3D7_1110600
		OG0004449	PF3D7_1330800							OG0001140	PF3D7_1203300							OG0001763	PF3D7_1110700
		OG0003337	PF3D7_0212100							OG0004886	PF3D7_1203400							OG0003860	PF3D7_1110800
		OG0001998	PF3D7_1403100							OG0001142	PF3D7_1203600							OG0001762	PF3D7_1110900
		OG0001588	PF3D7_1143300							OG0003494	PF3D7_1204100							OG0001759	PF3D7_1111200
		OG0001361	PF3D7_0416200							OG0001143	PF3D7_1204300							OG0000476	PF3D7_1111600
		OG0002590	PF3D7_1450600							OG0004887	PF3D7_1204900							OG0001754	PF3D7_1112200
		OG0004433	PF3D7_1326900							OG0001148	PF3D7_1205100							OG0003855	PF3D7_1112300
		OG0003103	PF3D7_1227100							OG0003498	PF3D7_1205400							OG0001751	PF3D7_1113000
		OG0003275	PF3D7_0612800							OG0001150	PF3D7_1205500							OG0001748	PF3D7_1113400
		OG0000295	PF3D7_0915400							OG0001151	PF3D7_1205600							OG0001747	PF3D7_1113500
		OG0003070	PF3D7_1221300							OG0001155	PF3D7_1206500							OG0003850	PF3D7_1113800
		OG0001673	PF3D7_1125000							OG0001156	PF3D7_1206600							OG0001745	PF3D7_1113900
		OG0000374	PF3D7_0210600							OG0003503	PF3D7_1206900							OG0001741	PF3D7_1114900
		OG0002852	PF3D7_1351700							OG0001163	PF3D7_1208100							OG0001737	PF3D7_1115500
		OG0004250	PF3D7_0615900							OG0001166	PF3D7_1208700							OG0003846	PF3D7_1116000
		OG0001525	PF3D7_0926700							OG0001168	PF3D7_1209000							OG0000472	PF3D7_1116100
		OG0003113	PF3D7_1228800							OG0003511	PF3D7_1209300							OG0003845	PF3D7_1116300
		OG0004593	PF3D7_0811300							OG0001170	PF3D7_1209400							OG0001735	PF3D7_1116400
		OG0002302	PF3D7_1010700							OG0003512	PF3D7_1209700							OG0001734	PF3D7_1116500
		OG0000757	PF3D7_0110500							OG0001173	PF3D7_1209800							OG0001730	PF3D7_1117100
		OG0002393	PF3D7_0804500							OG0001174	PF3D7_1209900							OG0001728	PF3D7_1117500
		OG0000549	PF3D7_0521700							OG0003516	PF3D7_1210600							OG0001727	PF3D7_1117700
		OG0003340	PF3D7_0212700							OG0001179	PF3D7_1210900							OG0001726	PF3D7_1117800
		OG0003087	PF3D7_1224300							OG0000289	PF3D7_1211000							OG0003839	PF3D7_1118400
		OG0003251	PF3D7_0604100							OG0003517	PF3D7_1211100							OG0000469	PF3D7_1118600
		OG0001822	PF3D7_0407700							OG0003518	PF3D7_1211200							OG0003838	PF3D7_1118700
		OG0001197	PF3D7_0411900							OG0001180	PF3D7_1211300							OG0001717	PF3D7_1119300
		OG0002545	PF3D7_1442500							OG0001183	PF3D7_1211600							OG0001716	PF3D7_1119400
		OG0003020	PF3D7_0810200							OG0003025	PF3D7_1212300							OG0001715	PF3D7_1119500
		OG0000296	PF3D7_1147300							OG0004601	PF3D7_1213500							OG0001708	PF3D7_1120600
		OG0001722	PF3D7_1118500							OG0000621	PF3D7_1213900							OG0001704	PF3D7_1121300
		OG0004193	PF3D7_1014900							OG0004604	PF3D7_1214500							OG0001703	PF3D7_1121400
		OG0000252	PF3D7_0216000							OG0003040	PF3D7_1215100							OG0000259	PF3D7_1121700
		OG0000326	PF3D7_1469600							OG0003041	PF3D7_1215200							OG0001697	PF3D7_1122200
		OG0003399	PF3D7_0315800							OG0003043	PF3D7_1215400							OG0003830	PF3D7_1122400
		OG0003071	PF3D7_1221400							OG0003044	PF3D7_1215600							OG0001695	PF3D7_1122600
		OG0004833	PF3D7_1219800							OG0004607	PF3D7_1215700							OG0001690	PF3D7_1123200
		OG0002593	PF3D7_1451100							OG0003047	PF3D7_1216000							OG0001689	PF3D7_1123300
		OG0004296	PF3D7_1474700							OG0004611	PF3D7_1216500							OG0001688	PF3D7_1123400
		OG0001849	PF3D7_1434500							OG0003050	PF3D7_1217200							OG0001685	PF3D7_1123800
		OG0001933	PF3D7_1416100							OG0000623	PF3D7_1217300							OG0001683	PF3D7_1124000
		OG0003782	PF3D7_1138700							OG0004615	PF3D7_1217500							OG0001682	PF3D7_1124100
		OG0000740	PF3D7_0612900							OG0003054	PF3D7_1217900							OG0001676	PF3D7_1124700
		OG0000301	PF3D7_1427100							OG0003061	PF3D7_1219100							OG0001675	PF3D7_1124800
		OG0003779	PF3D7_1139800							OG0004833	PF3D7_1219800							OG0001674	PF3D7_1124900
		OG0002721	PF3D7_1322900							OG0003064	PF3D7_1220100							OG0001673	PF3D7_1125000
		OG0002735	PF3D7_1324800							OG0003065	PF3D7_1220300							OG0003827	PF3D7_1125200
		OG0004681	PF3D7_1238500							OG0003066	PF3D7_1220400							OG0001671	PF3D7_1125300
		OG0004266	PF3D7_0523700							OG0003067	PF3D7_1220500							OG0003825	PF3D7_1125700
		OG0001738	PF3D7_1115200							OG0003070	PF3D7_1221300							OG0001668	PF3D7_1125800
		OG0003825	PF3D7_1125700							OG0003071	PF3D7_1221400							OG0001667	PF3D7_1125900
		OG0001612	PF3D7_1137200							OG0000215	PF3D7_1222400							OG0003824	PF3D7_1126500
		OG0003494	PF3D7_1204100							OG0003077	PF3D7_1222500							OG0003823	PF3D7_1126700
		OG0004596	PF3D7_0809800							OG0003079	PF3D7_1223200							OG0001663	PF3D7_1126900
		OG0002435	PF3D7_0517400							OG0004630	PF3D7_1223500							OG0003820	PF3D7_1127500
		OG0000492	PF3D7_1422800							OG0003088	PF3D7_1224400							OG0000467	PF3D7_1128500
		OG0004990	PF3D7_1462400							OG0004633	PF3D7_1224700							OG0003816	PF3D7_1129000
		OG0000679	PF3D7_0603000							OG0004634	PF3D7_1225000							OG0001651	PF3D7_1129200
		OG0001734	PF3D7_1116500							OG0004635	PF3D7_1225100							OG0000465	PF3D7_1129300
		OG0003705	PF3D7_0922800							OG0003093	PF3D7_1225200							OG0001649	PF3D7_1129500
		OG0003555	PF3D7_0725400							OG0003094	PF3D7_1225300							OG0003814	PF3D7_1129600
		OG0001825	PF3D7_0408400							OG0004636	PF3D7_1225400							OG0001647	PF3D7_1130000
		OG0000229	PF3D7_1019300							OG0003095	PF3D7_1225500							OG0001646	PF3D7_1130100
		OG0003050	PF3D7_1217200							OG0004637	PF3D7_1225600							OG0001645	PF3D7_1130200
		OG0004716	PF3D7_1252100							OG0004638	PF3D7_1225900							OG0001644	PF3D7_1130500
		OG0001238	PF3D7_0722300							OG0003097	PF3D7_1226000							OG0001642	PF3D7_1130700
		OG0001668	PF3D7_1125800							OG0004639	PF3D7_1226100							OG0003812	PF3D7_1130900
		OG0001333	PF3D7_0817200							OG0003098	PF3D7_1226400							OG0003808	PF3D7_1131400
		OG0000922	PF3D7_0304000							OG0000631	PF3D7_1226500							OG0003807	PF3D7_1131500
		OG0001605	PF3D7_1139500							OG0003100	PF3D7_1226700							OG0004974	PF3D7_1131600
		OG0003910	PF3D7_0410500							OG0003101	PF3D7_1226800							OG0003806	PF3D7_1131700
		OG0001880	PF3D7_1429700							OG0003102	PF3D7_1226900							OG0001637	PF3D7_1132100
		OG0001671	PF3D7_1125300							OG0004641	PF3D7_1227000							OG0001636	PF3D7_1132200
		OG0001814	PF3D7_0405900							OG0003103	PF3D7_1227100							OG0003803	PF3D7_1132500
		OG0002196	PF3D7_1359800							OG0003104	PF3D7_1227200							OG0001634	PF3D7_1132600
		OG0002885	PF3D7_1307600							OG0004642	PF3D7_1227300							OG0000463	PF3D7_1133200
		OG0004522	PF3D7_1303700							OG0005125	PF3D7_1227400							OG0001630	PF3D7_1133500
		OG0003009	PF3D7_0812220							OG0004643	PF3D7_1227500							OG0003800	PF3D7_1133600
		OG0003480	PF3D7_0421900							OG0004644	PF3D7_1227600							OG0001629	PF3D7_1133700
		OG0001636	PF3D7_1132200							OG0003107	PF3D7_1227900							OG0001628	PF3D7_1133800
		OG0002430	PF3D7_0516800							OG0003110	PF3D7_1228400							OG0003799	PF3D7_1133900
		OG0003584	PF3D7_0818300							OG0003111	PF3D7_1228500							OG0003798	PF3D7_1134200
		OG0003541	PF3D7_0719400							OG0004646	PF3D7_1228600							OG0000241	PF3D7_1134600
		OG0002397	PF3D7_0803400							OG0003112	PF3D7_1228700							OG0001621	PF3D7_1135100
		OG0003823	PF3D7_1126700							OG0003113	PF3D7_1228800							OG0001617	PF3D7_1135900
		OG0003728	PF3D7_0930100							OG0004647	PF3D7_1228900							OG0000461	PF3D7_1136200
		OG0000793	PF3D7_0103900							OG0003114	PF3D7_1229000							OG0001616	PF3D7_1136300
		OG0002499	PF3D7_0529000							OG0004648	PF3D7_1229300							OG0003789	PF3D7_1136600
		OG0002348	PF3D7_0320700							OG0003116	PF3D7_1229500							OG0000460	PF3D7_1136700
		OG0004598	PF3D7_0809200							OG0003117	PF3D7_1229600							OG0001615	PF3D7_1136800
		OG0002546	PF3D7_1442900							OG0004649	PF3D7_1229700							OG0000459	PF3D7_1137300
		OG0002235	PF3D7_1366600							OG0004650	PF3D7_1229800							OG0003788	PF3D7_1137400
		OG0003856	PF3D7_1112100							OG0003118	PF3D7_1230000							OG0001611	PF3D7_1137500
		OG0001505	PF3D7_0922900							OG0003119	PF3D7_1230100							OG0003784	PF3D7_1137900
		OG0003420	PF3D7_1018800							OG0003122	PF3D7_1230600							OG0003783	PF3D7_1138000
		OG0003118	PF3D7_1230000							OG0003125	PF3D7_1230900							OG0004788	PF3D7_1138300
		OG0001735	PF3D7_1116400							OG0000635	PF3D7_1231300							OG0001609	PF3D7_1138400
		OG0002466	PF3D7_0522400							OG0004657	PF3D7_1231800							OG0001607	PF3D7_1139100
		OG0003398	PF3D7_0315700							OG0004662	PF3D7_1232800							OG0001606	PF3D7_1139300
		OG0003537	PF3D7_0717600							OG0003132	PF3D7_1233000							OG0001605	PF3D7_1139500
		OG0003903	PF3D7_0407800							OG0003133	PF3D7_1233100							OG0001604	PF3D7_1139700
		OG0004706	PF3D7_1249400							OG0004663	PF3D7_1233400							OG0003779	PF3D7_1139800
		OG0004181	PF3D7_1010900							OG0000638	PF3D7_1233600							OG0001603	PF3D7_1139900
		OG0004697	PF3D7_1245500							OG0004664	PF3D7_1233700							OG0003776	PF3D7_1140600
		OG0003283	PF3D7_0108700							OG0000639	PF3D7_1233900							OG0003774	PF3D7_1140800
		OG0000901	PF3D7_0218600							OG0003137	PF3D7_1234100							OG0001597	PF3D7_1141300
		OG0003256	PF3D7_0605700							OG0003138	PF3D7_1234300							OG0003772	PF3D7_1141400
		OG0000421	PF3D7_0816500							OG0003140	PF3D7_1234800							OG0001596	PF3D7_1141600
		OG0004164	PF3D7_1004600							OG0003143	PF3D7_1235500							OG0003770	PF3D7_1141900
		OG0000983	PF3D7_0316000							OG0004671	PF3D7_1235800							OG0001593	PF3D7_1142100
		OG0002790	PF3D7_1338600							OG0003148	PF3D7_1236200							OG0003767	PF3D7_1142500
		OG0003442	PF3D7_1024800							OG0004673	PF3D7_1236400							OG0001590	PF3D7_1142600
		OG0004330	PF3D7_1447400							OG0004674	PF3D7_1236500							OG0000457	PF3D7_1143000
		OG0001019	PF3D7_1019000							OG0003150	PF3D7_1236700							OG0001589	PF3D7_1143100
		OG0001835	PF3D7_0410300							OG0004675	PF3D7_1237200							OG0001588	PF3D7_1143300
		OG0003148	PF3D7_1236200							OG0003156	PF3D7_1237600							OG0003764	PF3D7_1143500
		OG0000561	PF3D7_1445000							OG0004678	PF3D7_1237700							OG0003763	PF3D7_1143600
		OG0003438	PF3D7_1024000							OG0000642	PF3D7_1238700							OG0003762	PF3D7_1143700
		OG0004426	PF3D7_1325900							OG0003162	PF3D7_1238800							OG0001586	PF3D7_1143800
		OG0004910	PF3D7_0910500							OG0004682	PF3D7_1239200							OG0001585	PF3D7_1143900
		OG0000812	PF3D7_0728800							OG0003168	PF3D7_1239500							OG0001583	PF3D7_1144100
		OG0003511	PF3D7_1209300							OG0005013	PF3D7_1239600							OG0000455	PF3D7_1145400
		OG0004542	PF3D7_1309200							OG0003169	PF3D7_1239700							OG0004787	PF3D7_1145900
		OG0003628	PF3D7_0704500							OG0000644	PF3D7_1241400							OG0003756	PF3D7_1146200
		OG0001035	PF3D7_1022000							OG0004686	PF3D7_1242000							OG0001572	PF3D7_1146500
		OG0003463	PF3D7_1032100							OG0003176	PF3D7_1242200							OG0003754	PF3D7_1146700
		OG0001006	PF3D7_0903400							OG0003179	PF3D7_1242800							OG0001571	PF3D7_1146800
		OG0000511	PF3D7_0514000							OG0004692	PF3D7_1243300							OG0004998	PF3D7_1201400
		OG0004201	PF3D7_0323200							OG0005126	PF3D7_1243400							OG0003486	PF3D7_1201600
		OG0000882	PF3D7_0215200							OG0003186	PF3D7_1244000							OG0003487	PF3D7_1201700
		OG0001542	PF3D7_0929600							OG0003188	PF3D7_1244200							OG0001134	PF3D7_1202000
		OG0004674	PF3D7_1236500							OG0004694	PF3D7_1244500							OG0000404	PF3D7_1202500
		OG0001512	PF3D7_0924000							OG0004695	PF3D7_1244900							OG0003489	PF3D7_1202700
		OG0003390	PF3D7_0313600							OG0003193	PF3D7_1245100							OG0001138	PF3D7_1203000
		OG0001917	PF3D7_1420200							OG0003195	PF3D7_1245400							OG0003491	PF3D7_1203100
		OG0000865	PF3D7_0211700							OG0004697	PF3D7_1245500							OG0001139	PF3D7_1203200
		OG0004795	PF3D7_0410000							OG0003196	PF3D7_1245600							OG0001140	PF3D7_1203300
		OG0000320	PF3D7_1475500							OG0004699	PF3D7_1246700							OG0004886	PF3D7_1203400
		OG0000829	PF3D7_0203700							OG0003202	PF3D7_1246800							OG0001142	PF3D7_1203600
		OG0004552	PF3D7_1313100							OG0003204	PF3D7_1247200							OG0003494	PF3D7_1204100
		OG0003799	PF3D7_1133900							OG0003208	PF3D7_1247800							OG0001143	PF3D7_1204300
		OG0004978	PF3D7_1359600							OG0003209	PF3D7_1248100							OG0001144	PF3D7_1204400
		OG0001224	PF3D7_0719900							OG0004702	PF3D7_1248400							OG0004887	PF3D7_1204900
		OG0002788	PF3D7_1338300							OG0003212	PF3D7_1248600							OG0001148	PF3D7_1205100
		OG0001059	PF3D7_1026800							OG0004706	PF3D7_1249400							OG0003498	PF3D7_1205400
		OG0002610	PF3D7_1454400							OG0003215	PF3D7_1249500							OG0001150	PF3D7_1205500
		OG0001704	PF3D7_1121300							OG0004707	PF3D7_1249700							OG0001151	PF3D7_1205600
		OG0001604	PF3D7_1139700							OG0003217	PF3D7_1249900							OG0003499	PF3D7_1205700
		OG0005013	PF3D7_1239600							OG0004709	PF3D7_1250100							OG0001155	PF3D7_1206500
		OG0001018	PF3D7_1018600							OG0003218	PF3D7_1250200							OG0001156	PF3D7_1206600
		OG0000962	PF3D7_0311100							OG0003219	PF3D7_1250300							OG0003503	PF3D7_1206900
		OG0004579	PF3D7_0715200							OG0003222	PF3D7_1250800							OG0001163	PF3D7_1208100
		OG0003719	PF3D7_0926800							OG0003225	PF3D7_1251200							OG0001166	PF3D7_1208700
		OG0003941	PF3D7_1427000							OG0003226	PF3D7_1251300							OG0001168	PF3D7_1209000
		OG0003487	PF3D7_1201700							OG0003227	PF3D7_1251500							OG0003511	PF3D7_1209300
		OG0003320	PF3D7_0205600							OG0003228	PF3D7_1251700							OG0001170	PF3D7_1209400
		OG0002090	PF3D7_0617100							OG0004716	PF3D7_1252100							OG0003512	PF3D7_1209700
		OG0001810	PF3D7_0405400							OG0005010	PF3D7_1302300							OG0001173	PF3D7_1209800
		OG0002324	PF3D7_1014300							OG0002862	PF3D7_1302800							OG0001174	PF3D7_1209900
		OG0004239	PF3D7_0805100							OG0004520	PF3D7_1302900							OG0003516	PF3D7_1210600
		OG0001262	PF3D7_0829000							OG0000604	PF3D7_1303500							OG0001179	PF3D7_1210900
		OG0003525	PF3D7_0410800							OG0004522	PF3D7_1303700							OG0000289	PF3D7_1211000
		OG0001629	PF3D7_1133700							OG0002869	PF3D7_1304100							OG0003517	PF3D7_1211100
		OG0003538	PF3D7_0717800							OG0000605	PF3D7_1304200							OG0003518	PF3D7_1211200
		OG0001444	PF3D7_0911100							OG0002875	PF3D7_1305200							OG0001180	PF3D7_1211300
		OG0003169	PF3D7_1239700							OG0000607	PF3D7_1305300							OG0001183	PF3D7_1211600
		OG0000821	PF3D7_0729900							OG0004529	PF3D7_1306500							OG0001184	PF3D7_1211700
		OG0001644	PF3D7_1130500							OG0002882	PF3D7_1306900							OG0001186	PF3D7_1212100
		OG0004884	PF3D7_0212800							OG0002884	PF3D7_1307300							OG0003025	PF3D7_1212300
		OG0004484	PF3D7_1344700							OG0004532	PF3D7_1307400							OG0003027	PF3D7_1212500
		OG0000890	PF3D7_0217100							OG0004533	PF3D7_1307500							OG0004601	PF3D7_1213500
		OG0003478	PF3D7_0421700							OG0002885	PF3D7_1307600							OG0000621	PF3D7_1213900
		OG0001828	PF3D7_0409200							OG0002886	PF3D7_1307700							OG0004604	PF3D7_1214500
		OG0003119	PF3D7_1230100							OG0004535	PF3D7_1308000							OG0003040	PF3D7_1215100
		OG0001486	PF3D7_0919200							OG0002888	PF3D7_1308200							OG0003041	PF3D7_1215200
		OG0003544	PF3D7_0721000							OG0004538	PF3D7_1308500							OG0003042	PF3D7_1215300
		OG0004015	PF3D7_1402800							OG0004540	PF3D7_1308700							OG0003043	PF3D7_1215400
		OG0000717	PF3D7_0608800							OG0002890	PF3D7_1308800							OG0003044	PF3D7_1215600
		OG0004468	PF3D7_1338900							OG0002891	PF3D7_1308900							OG0004607	PF3D7_1215700
		OG0001394	PF3D7_0706000							OG0004541	PF3D7_1309000							OG0003045	PF3D7_1215800
		OG0002093	PF3D7_0617800							OG0002892	PF3D7_1309100							OG0003047	PF3D7_1216000
		OG0003664	PF3D7_0911300							OG0004542	PF3D7_1309200							OG0004611	PF3D7_1216500
		OG0005122	PF3D7_1416600							OG0002895	PF3D7_1309500							OG0003050	PF3D7_1217200
		OG0004417	PF3D7_1322700							OG0002898	PF3D7_1309800							OG0000623	PF3D7_1217300
		OG0002044	PF3D7_0507800							OG0004544	PF3D7_1310100							OG0004615	PF3D7_1217500
		OG0003696	PF3D7_0920600							OG0004545	PF3D7_1310200							OG0003054	PF3D7_1217900
		OG0003458	PF3D7_1029900							OG0004547	PF3D7_1310400							OG0004833	PF3D7_1219800
		OG0001401	PF3D7_0707700							OG0002905	PF3D7_1311200							OG0003064	PF3D7_1220100
		OG0003321	PF3D7_0206500							OG0002914	PF3D7_1312400							OG0003065	PF3D7_1220300
		OG0003630	PF3D7_0704800							OG0000612	PF3D7_1312600							OG0003066	PF3D7_1220400
		OG0000453	PF3D7_1147200							OG0002916	PF3D7_1313000							OG0003067	PF3D7_1220500
		OG0001844	PF3D7_1435200							OG0004552	PF3D7_1313100							OG0003070	PF3D7_1221300
		OG0001179	PF3D7_1210900							OG0002918	PF3D7_1313300							OG0003071	PF3D7_1221400
		OG0003104	PF3D7_1227200							OG0002919	PF3D7_1313400							OG0003077	PF3D7_1222500
		OG0001250	PF3D7_0724000							OG0004553	PF3D7_1313800							OG0003079	PF3D7_1223200
		OG0000780	PF3D7_0106300							OG0002930	PF3D7_1314700							OG0004630	PF3D7_1223500
		OG0000226	PF3D7_0107500							OG0004559	PF3D7_1316200							OG0003088	PF3D7_1224400
		OG0002387	PF3D7_0805300							OG0002942	PF3D7_1316600							OG0004633	PF3D7_1224700
		OG0002086	PF3D7_0616200							OG0002945	PF3D7_1316900							OG0004634	PF3D7_1225000
		OG0003920	PF3D7_1433800							OG0000615	PF3D7_1318000							OG0004635	PF3D7_1225100
		OG0001879	PF3D7_1429800							OG0002952	PF3D7_1318100							OG0003093	PF3D7_1225200
		OG0003384	PF3D7_0311200							OG0004566	PF3D7_1319200							OG0003094	PF3D7_1225300
		OG0004275	PF3D7_0525900							OG0004567	PF3D7_1319600							OG0004636	PF3D7_1225400
		OG0001482	PF3D7_0918800							OG0002964	PF3D7_1320200							OG0003095	PF3D7_1225500
		OG0000329	PF3D7_1311800							OG0002965	PF3D7_1320300							OG0004637	PF3D7_1225600
		OG0001064	PF3D7_1027800							OG0002966	PF3D7_1320400							OG0003097	PF3D7_1226000
		OG0003339	PF3D7_0212500							OG0002969	PF3D7_1320700							OG0004639	PF3D7_1226100
		OG0004538	PF3D7_1308500							OG0002970	PF3D7_1320800							OG0003098	PF3D7_1226400
		OG0003255	PF3D7_0605600							OG0004571	PF3D7_1321200							OG0000631	PF3D7_1226500
		OG0001458	PF3D7_0913700							OG0000330	PF3D7_1321400							OG0003100	PF3D7_1226700
		OG0003462	PF3D7_1031900							OG0004573	PF3D7_1321600							OG0003102	PF3D7_1226900
		OG0004199	PF3D7_0323400							OG0002717	PF3D7_1322200							OG0003103	PF3D7_1227100
		OG0003312	PF3D7_0203000							OG0005115	PF3D7_1322600							OG0003104	PF3D7_1227200
		OG0001095	PF3D7_1033500							OG0004417	PF3D7_1322700							OG0004642	PF3D7_1227300
		OG0001607	PF3D7_1139100							OG0002720	PF3D7_1322800							OG0005125	PF3D7_1227400
		OG0002627	PF3D7_1458300							OG0002721	PF3D7_1322900							OG0004643	PF3D7_1227500
		OG0000393	PF3D7_1023000							OG0002722	PF3D7_1323000							OG0004644	PF3D7_1227600
		OG0000640	PF3D7_1235300							OG0002723	PF3D7_1323100							OG0003107	PF3D7_1227900
		OG0001549	PF3D7_0931600							OG0002724	PF3D7_1323200							OG0003110	PF3D7_1228400
		OG0003137	PF3D7_1234100							OG0002725	PF3D7_1323300							OG0003111	PF3D7_1228500
		OG0004630	PF3D7_1223500							OG0004418	PF3D7_1323600							OG0004646	PF3D7_1228600
		OG0003992	PF3D7_1410300							OG0002728	PF3D7_1323800							OG0003112	PF3D7_1228700
		OG0000209	PF3D7_0827900							OG0002729	PF3D7_1323900							OG0003113	PF3D7_1228800
		OG0004567	PF3D7_1319600							OG0002730	PF3D7_1324000							OG0004647	PF3D7_1228900
		OG0001386	PF3D7_0703500							OG0002732	PF3D7_1324400							OG0003114	PF3D7_1229000
		OG0002791	PF3D7_1338700							OG0002733	PF3D7_1324500							OG0004648	PF3D7_1229300
		OG0002672	PF3D7_1466400							OG0002735	PF3D7_1324800							OG0003116	PF3D7_1229500
		OG0002891	PF3D7_1308900							OG0002737	PF3D7_1325100							OG0003117	PF3D7_1229600
		OG0002898	PF3D7_1309800							OG0004423	PF3D7_1325400							OG0004650	PF3D7_1229800
		OG0004327	PF3D7_1446500							OG0004425	PF3D7_1325800							OG0003118	PF3D7_1230000
		OG0002141	PF3D7_0627100							OG0004426	PF3D7_1325900							OG0003119	PF3D7_1230100
		OG0004994	PF3D7_1442700							OG0004429	PF3D7_1326200							OG0003122	PF3D7_1230600
		OG0001589	PF3D7_1143100							OG0000583	PF3D7_1326300							OG0003124	PF3D7_1230800
		OG0000254	PF3D7_0822700							OG0002740	PF3D7_1326400							OG0003125	PF3D7_1230900
		OG0003286	PF3D7_0107700							OG0004430	PF3D7_1326500							OG0000635	PF3D7_1231300
		OG0003416	PF3D7_1017800							OG0004433	PF3D7_1326900							OG0004657	PF3D7_1231800
		OG0002749	PF3D7_1329100							OG0004434	PF3D7_1327000							OG0004658	PF3D7_1231900
		OG0002029	PF3D7_0505400							OG0000584	PF3D7_1327100							OG0003128	PF3D7_1232100
		OG0002376	PF3D7_0807800							OG0004435	PF3D7_1327200							OG0004662	PF3D7_1232800
		OG0000833	PF3D7_0204200							OG0002746	PF3D7_1328100							OG0003132	PF3D7_1233000
		OG0001163	PF3D7_1208100							OG0004440	PF3D7_1328600							OG0003133	PF3D7_1233100
		OG0003112	PF3D7_1228700							OG0002748	PF3D7_1329000							OG0004663	PF3D7_1233400
		OG0001974	PF3D7_1407700							OG0002749	PF3D7_1329100							OG0000638	PF3D7_1233600
		OG0001637	PF3D7_1132100							OG0004443	PF3D7_1329500							OG0004664	PF3D7_1233700
		OG0004995	PF3D7_1442400							OG0000587	PF3D7_1330000							OG0000639	PF3D7_1233900
		OG0003650	PF3D7_0317300							OG0004447	PF3D7_1330100							OG0003137	PF3D7_1234100
		OG0003820	PF3D7_1127500							OG0004448	PF3D7_1330200							OG0003138	PF3D7_1234300
		OG0001122	PF3D7_0422200							OG0000589	PF3D7_1330400							OG0003140	PF3D7_1234800
		OG0004648	PF3D7_1229300							OG0002754	PF3D7_1330600							OG0003143	PF3D7_1235500
		OG0001970	PF3D7_1409100							OG0002755	PF3D7_1330700							OG0004671	PF3D7_1235800
		OG0000926	PF3D7_0305000							OG0004449	PF3D7_1330800							OG0003148	PF3D7_1236200
		OG0002118	PF3D7_0622900							OG0004450	PF3D7_1331100							OG0004673	PF3D7_1236400
		OG0002719	PF3D7_1322500							OG0002759	PF3D7_1331600							OG0004674	PF3D7_1236500
		OG0002261	PF3D7_1003600							OG0002760	PF3D7_1331700							OG0003150	PF3D7_1236700
		OG0001280	PF3D7_0826100							OG0002763	PF3D7_1332200							OG0004675	PF3D7_1237200
		OG0003902	PF3D7_0407600							OG0002764	PF3D7_1332300							OG0003156	PF3D7_1237600
		OG0004781	PF3D7_0821000							OG0000590	PF3D7_1332400							OG0004678	PF3D7_1237700
		OG0004692	PF3D7_1243300							OG0002766	PF3D7_1332600							OG0000642	PF3D7_1238700
		OG0000792	PF3D7_0104400							OG0004455	PF3D7_1333500							OG0003162	PF3D7_1238800
		OG0001316	PF3D7_0820700							OG0004456	PF3D7_1333600							OG0004682	PF3D7_1239200
		OG0003143	PF3D7_1235500							OG0004825	PF3D7_1333700							OG0003168	PF3D7_1239500
		OG0003737	PF3D7_0931700							OG0002773	PF3D7_1334100							OG0005013	PF3D7_1239600
		OG0000506	PF3D7_0506900							OG0004461	PF3D7_1335800							OG0003169	PF3D7_1239700
		OG0004682	PF3D7_1239200							OG0002777	PF3D7_1336400							OG0000644	PF3D7_1241400
		OG0002272	PF3D7_1005900							OG0002778	PF3D7_1336600							OG0004686	PF3D7_1242000
		OG0001904	PF3D7_1422900							OG0004464	PF3D7_1337400							OG0003176	PF3D7_1242200
		OG0003225	PF3D7_1251200							OG0004465	PF3D7_1337500							OG0004689	PF3D7_1242400
		OG0001838	PF3D7_0410700							OG0002784	PF3D7_1337800							OG0004692	PF3D7_1243300
		OG0002892	PF3D7_1309100							OG0002785	PF3D7_1338000							OG0005126	PF3D7_1243400
		OG0004026	PF3D7_0505700							OG0002787	PF3D7_1338200							OG0003186	PF3D7_1244000
		OG0001806	PF3D7_0403700							OG0002788	PF3D7_1338300							OG0003188	PF3D7_1244200
		OG0002321	PF3D7_1013500							OG0002789	PF3D7_1338400							OG0004694	PF3D7_1244500
		OG0004683	PF3D7_1239800							OG0002790	PF3D7_1338600							OG0003193	PF3D7_1245100
		OG0002273	PF3D7_1006000							OG0002791	PF3D7_1338700							OG0003195	PF3D7_1245400
		OG0000472	PF3D7_1116100							OG0002792	PF3D7_1338800							OG0004697	PF3D7_1245500
		OG0002208	PF3D7_1362100							OG0004468	PF3D7_1338900							OG0003196	PF3D7_1245600
		OG0003645	PF3D7_0318500							OG0004469	PF3D7_1339300							OG0004699	PF3D7_1246700
		OG0000564	PF3D7_1449600							OG0002793	PF3D7_1339400							OG0003202	PF3D7_1246800
		OG0003606	PF3D7_0417400							OG0002794	PF3D7_1339500							OG0003204	PF3D7_1247200
		OG0002717	PF3D7_1322200							OG0004472	PF3D7_1339900							OG0003208	PF3D7_1247800
		OG0004900	PF3D7_0203100							OG0004473	PF3D7_1340000							OG0003209	PF3D7_1248100
		OG0002841	PF3D7_1349500							OG0004476	PF3D7_1340500							OG0004702	PF3D7_1248400
		OG0002421	PF3D7_0615600							OG0002805	PF3D7_1341800							OG0003212	PF3D7_1248600
		OG0001034	PF3D7_1021900							OG0002806	PF3D7_1341900							OG0004706	PF3D7_1249400
		OG0003958	PF3D7_1420700							OG0002809	PF3D7_1342400							OG0004707	PF3D7_1249700
		OG0003792	PF3D7_1136000							OG0002811	PF3D7_1343200							OG0003217	PF3D7_1249900
		OG0004125	PF3D7_1359900							OG0002814	PF3D7_1343600							OG0003218	PF3D7_1250200
		OG0005006	PF3D7_1408300							OG0002816	PF3D7_1343800							OG0003220	PF3D7_1250500
		OG0000488	PF3D7_1431500							OG0002817	PF3D7_1343900							OG0003222	PF3D7_1250800
		OG0001388	PF3D7_0704600							OG0002821	PF3D7_1344500							OG0003225	PF3D7_1251200
		OG0001256	PF3D7_0724900							OG0002822	PF3D7_1344600							OG0003226	PF3D7_1251300
		OG0004660	PF3D7_1232500							OG0004484	PF3D7_1344700							OG0003227	PF3D7_1251500
		OG0004338	PF3D7_1451200							OG0002823	PF3D7_1344800							OG0003228	PF3D7_1251700
		OG0001212	PF3D7_0718300							OG0004485	PF3D7_1344900							OG0004716	PF3D7_1252100
		OG0001091	PF3D7_1032700							OG0004486	PF3D7_1345000							OG0005010	PF3D7_1302300
		OG0000949	PF3D7_0308700							OG0004487	PF3D7_1345100							OG0002862	PF3D7_1302800
		OG0002763	PF3D7_1332200							OG0002824	PF3D7_1345200							OG0004520	PF3D7_1302900
		OG0003730	PF3D7_0930300							OG0004491	PF3D7_1345800							OG0000604	PF3D7_1303500
		OG0001518	PF3D7_0925200							OG0002827	PF3D7_1346100							OG0004522	PF3D7_1303700
		OG0000476	PF3D7_1111600							OG0004494	PF3D7_1346500							OG0002869	PF3D7_1304100
		OG0004049	PF3D7_0512400							OG0000597	PF3D7_1347100							OG0000605	PF3D7_1304200
		OG0002447	PF3D7_0518900							OG0000598	PF3D7_1347200							OG0002875	PF3D7_1305200
		OG0002406	PF3D7_0802000							OG0002832	PF3D7_1347700							OG0000607	PF3D7_1305300
		OG0004514	PF3D7_1351600							OG0004500	PF3D7_1348000							OG0004529	PF3D7_1306500
		OG0003330	PF3D7_0209500							OG0002834	PF3D7_1348100							OG0002884	PF3D7_1307300
		OG0000638	PF3D7_1233600							OG0002836	PF3D7_1348300							OG0004532	PF3D7_1307400
		OG0003891	PF3D7_0404900							OG0004501	PF3D7_1348400							OG0004533	PF3D7_1307500
		OG0000546	PF3D7_0519800							OG0000600	PF3D7_1348700							OG0002885	PF3D7_1307600
		OG0004354	PF3D7_1456000							OG0002838	PF3D7_1349200							OG0002886	PF3D7_1307700
		OG0003437	PF3D7_1023800							OG0002839	PF3D7_1349300							OG0004535	PF3D7_1308000
		OG0002117	PF3D7_0622800							OG0002840	PF3D7_1349400							OG0002888	PF3D7_1308200
		OG0000154	PF3D7_1023100							OG0004507	PF3D7_1349600							OG0004538	PF3D7_1308500
		OG0000289	PF3D7_1211000							OG0002843	PF3D7_1349800							OG0004540	PF3D7_1308700
		OG0004315	PF3D7_1442600							OG0002844	PF3D7_1350100							OG0002890	PF3D7_1308800
										OG0004512	PF3D7_1350800							OG0002891	PF3D7_1308900
										OG0000602	PF3D7_1351300							OG0004541	PF3D7_1309000
										OG0004514	PF3D7_1351600							OG0002892	PF3D7_1309100
										OG0002852	PF3D7_1351700							OG0004542	PF3D7_1309200
										OG0000603	PF3D7_1352100							OG0002895	PF3D7_1309500
										OG0002857	PF3D7_1352700							OG0004544	PF3D7_1310100
										OG0002858	PF3D7_1352800							OG0004545	PF3D7_1310200
										OG0004983	PF3D7_1352900							OG0004547	PF3D7_1310400
										OG0004110	PF3D7_1353400							OG0002900	PF3D7_1310600
										OG0002169	PF3D7_1354300							OG0002902	PF3D7_1310800
										OG0000519	PF3D7_1354800							OG0002903	PF3D7_1310900
										OG0004113	PF3D7_1354900							OG0004549	PF3D7_1311100
										OG0002173	PF3D7_1355200							OG0002905	PF3D7_1311200
										OG0002174	PF3D7_1355500							OG0002914	PF3D7_1312400
										OG0004979	PF3D7_1355600							OG0002916	PF3D7_1313000
										OG0004116	PF3D7_1356100							OG0004552	PF3D7_1313100
										OG0002179	PF3D7_1356400							OG0002918	PF3D7_1313300
										OG0002180	PF3D7_1356700							OG0002919	PF3D7_1313400
										OG0002183	PF3D7_1357200							OG0004553	PF3D7_1313800
										OG0004119	PF3D7_1357400							OG0002930	PF3D7_1314700
										OG0000521	PF3D7_1357500							OG0004559	PF3D7_1316200
										OG0002185	PF3D7_1357700							OG0002942	PF3D7_1316600
										OG0002186	PF3D7_1357800							OG0002945	PF3D7_1316900
										OG0000522	PF3D7_1357900							OG0002947	PF3D7_1317100
										OG0002187	PF3D7_1358000							OG0002950	PF3D7_1317800
										OG0002188	PF3D7_1358100							OG0000615	PF3D7_1318000
										OG0004120	PF3D7_1358200							OG0002952	PF3D7_1318100
										OG0004121	PF3D7_1358300							OG0004566	PF3D7_1319200
										OG0004122	PF3D7_1358400							OG0004567	PF3D7_1319600
										OG0000523	PF3D7_1358600							OG0002964	PF3D7_1320200
										OG0002190	PF3D7_1358700							OG0002965	PF3D7_1320300
										OG0002193	PF3D7_1359000							OG0002966	PF3D7_1320400
										OG0002194	PF3D7_1359100							OG0002969	PF3D7_1320700
										OG0000313	PF3D7_1359300							OG0002970	PF3D7_1320800
										OG0004978	PF3D7_1359600							OG0004571	PF3D7_1321200
										OG0004124	PF3D7_1359700							OG0000330	PF3D7_1321400
										OG0002196	PF3D7_1359800							OG0004573	PF3D7_1321600
										OG0004127	PF3D7_1360500							OG0002717	PF3D7_1322200
										OG0002208	PF3D7_1362100							OG0005115	PF3D7_1322600
										OG0002212	PF3D7_1362500							OG0004417	PF3D7_1322700
										OG0004132	PF3D7_1362600							OG0002720	PF3D7_1322800
										OG0004133	PF3D7_1362800							OG0002721	PF3D7_1322900
										OG0004134	PF3D7_1362900							OG0002722	PF3D7_1323000
										OG0004135	PF3D7_1363000							OG0002723	PF3D7_1323100
										OG0004136	PF3D7_1363100							OG0002724	PF3D7_1323200
										OG0002215	PF3D7_1363500							OG0002725	PF3D7_1323300
										OG0002219	PF3D7_1364000							OG0002726	PF3D7_1323400
										OG0005106	PF3D7_1364100							OG0004418	PF3D7_1323600
										OG0004139	PF3D7_1364200							OG0002728	PF3D7_1323800
										OG0004140	PF3D7_1364400							OG0002729	PF3D7_1323900
										OG0002225	PF3D7_1365000							OG0002730	PF3D7_1324000
										OG0002230	PF3D7_1365600							OG0002732	PF3D7_1324400
										OG0002235	PF3D7_1366600							OG0002733	PF3D7_1324500
										OG0004144	PF3D7_1366700							OG0002735	PF3D7_1324800
										OG0002236	PF3D7_1366800							OG0002737	PF3D7_1325100
										OG0004145	PF3D7_1367300							OG0004423	PF3D7_1325400
										OG0004146	PF3D7_1367400							OG0004425	PF3D7_1325800
										OG0004149	PF3D7_1368300							OG0004426	PF3D7_1325900
										OG0002248	PF3D7_1368700							OG0004428	PF3D7_1326100
										OG0002249	PF3D7_1368800							OG0004429	PF3D7_1326200
										OG0002252	PF3D7_1369400							OG0000583	PF3D7_1326300
										OG0004156	PF3D7_1369600							OG0002740	PF3D7_1326400
										OG0001999	PF3D7_1402700							OG0004430	PF3D7_1326500
										OG0004015	PF3D7_1402800							OG0004433	PF3D7_1326900
										OG0004014	PF3D7_1402900							OG0004434	PF3D7_1327000
										OG0004013	PF3D7_1403000							OG0000584	PF3D7_1327100
										OG0001998	PF3D7_1403100							OG0004435	PF3D7_1327200
										OG0004011	PF3D7_1403500							OG0002746	PF3D7_1328100
										OG0004009	PF3D7_1403800							OG0004440	PF3D7_1328600
										OG0004008	PF3D7_1404000							OG0002748	PF3D7_1329000
										OG0000234	PF3D7_1404600							OG0002749	PF3D7_1329100
										OG0001992	PF3D7_1405100							OG0004443	PF3D7_1329500
										OG0001985	PF3D7_1406100							OG0000587	PF3D7_1330000
										OG0003999	PF3D7_1406600							OG0004447	PF3D7_1330100
										OG0001978	PF3D7_1407100							OG0004448	PF3D7_1330200
										OG0001974	PF3D7_1407700							OG0000589	PF3D7_1330400
										OG0005006	PF3D7_1408300							OG0002754	PF3D7_1330600
										OG0000500	PF3D7_1408400							OG0002755	PF3D7_1330700
										OG0001970	PF3D7_1409100							OG0004449	PF3D7_1330800
										OG0001968	PF3D7_1409300							OG0004450	PF3D7_1331100
										OG0001964	PF3D7_1410000							OG0002759	PF3D7_1331600
										OG0003993	PF3D7_1410100							OG0002760	PF3D7_1331700
										OG0001963	PF3D7_1410200							OG0002762	PF3D7_1332000
										OG0001960	PF3D7_1411000							OG0002763	PF3D7_1332200
										OG0003988	PF3D7_1411100							OG0000590	PF3D7_1332400
										OG0003987	PF3D7_1411200							OG0002766	PF3D7_1332600
										OG0003986	PF3D7_1411500							OG0004455	PF3D7_1333500
										OG0003982	PF3D7_1412200							OG0004456	PF3D7_1333600
										OG0001955	PF3D7_1412400							OG0004825	PF3D7_1333700
										OG0000498	PF3D7_1412900							OG0002772	PF3D7_1333800
										OG0003979	PF3D7_1413100							OG0002773	PF3D7_1334100
										OG0001951	PF3D7_1413400							OG0004461	PF3D7_1335800
										OG0003977	PF3D7_1414200							OG0002777	PF3D7_1336400
										OG0001940	PF3D7_1414900							OG0002778	PF3D7_1336600
										OG0005003	PF3D7_1415600							OG0004465	PF3D7_1337500
										OG0001933	PF3D7_1416100							OG0002784	PF3D7_1337800
										OG0001932	PF3D7_1416200							OG0002785	PF3D7_1338000
										OG0003973	PF3D7_1416400							OG0002787	PF3D7_1338200
										OG0005122	PF3D7_1416600							OG0002788	PF3D7_1338300
										OG0003971	PF3D7_1417100							OG0002789	PF3D7_1338400
										OG0003969	PF3D7_1417300							OG0002790	PF3D7_1338600
										OG0003967	PF3D7_1418200							OG0002791	PF3D7_1338700
										OG0001921	PF3D7_1419100							OG0002792	PF3D7_1338800
										OG0003962	PF3D7_1419400							OG0004468	PF3D7_1338900
										OG0003960	PF3D7_1419600							OG0004469	PF3D7_1339300
										OG0001918	PF3D7_1420000							OG0002794	PF3D7_1339500
										OG0001917	PF3D7_1420200							OG0004472	PF3D7_1339900
										OG0003959	PF3D7_1420500							OG0004473	PF3D7_1340000
										OG0001915	PF3D7_1420600							OG0004476	PF3D7_1340500
										OG0003958	PF3D7_1420700							OG0002797	PF3D7_1340600
										OG0001914	PF3D7_1420900							OG0002805	PF3D7_1341800
										OG0003954	PF3D7_1421800							OG0002806	PF3D7_1341900
										OG0003953	PF3D7_1421900							OG0002809	PF3D7_1342400
										OG0001908	PF3D7_1422200							OG0002811	PF3D7_1343200
										OG0003952	PF3D7_1422300							OG0002814	PF3D7_1343600
										OG0001907	PF3D7_1422400							OG0002815	PF3D7_1343700
										OG0001905	PF3D7_1422700							OG0002816	PF3D7_1343800
										OG0000492	PF3D7_1422800							OG0002817	PF3D7_1343900
										OG0001904	PF3D7_1422900							OG0002821	PF3D7_1344500
										OG0000491	PF3D7_1423000							OG0002822	PF3D7_1344600
										OG0003949	PF3D7_1423400							OG0004484	PF3D7_1344700
										OG0001899	PF3D7_1424400							OG0002823	PF3D7_1344800
										OG0003946	PF3D7_1425300							OG0004485	PF3D7_1344900
										OG0000490	PF3D7_1425400							OG0004486	PF3D7_1345000
										OG0001898	PF3D7_1425500							OG0004487	PF3D7_1345100
										OG0004798	PF3D7_1425900							OG0002824	PF3D7_1345200
										OG0003944	PF3D7_1426500							OG0004491	PF3D7_1345800
										OG0004797	PF3D7_1426600							OG0002827	PF3D7_1346100
										OG0003943	PF3D7_1426700							OG0004494	PF3D7_1346500
										OG0001893	PF3D7_1426900							OG0000597	PF3D7_1347100
										OG0003941	PF3D7_1427000							OG0000598	PF3D7_1347200
										OG0000301	PF3D7_1427100							OG0004500	PF3D7_1348000
										OG0003940	PF3D7_1427200							OG0002834	PF3D7_1348100
										OG0003939	PF3D7_1427300							OG0002836	PF3D7_1348300
										OG0001889	PF3D7_1427900							OG0004501	PF3D7_1348400
										OG0003935	PF3D7_1428200							OG0000600	PF3D7_1348700
										OG0003933	PF3D7_1428900							OG0004503	PF3D7_1348800
										OG0001884	PF3D7_1429100							OG0002838	PF3D7_1349200
										OG0003932	PF3D7_1429200							OG0002839	PF3D7_1349300
										OG0001882	PF3D7_1429400							OG0002840	PF3D7_1349400
										OG0001881	PF3D7_1429500							OG0004507	PF3D7_1349600
										OG0001880	PF3D7_1429700							OG0002843	PF3D7_1349800
										OG0001879	PF3D7_1429800							OG0002844	PF3D7_1350100
										OG0003930	PF3D7_1429900							OG0004512	PF3D7_1350800
										OG0001875	PF3D7_1430300							OG0000602	PF3D7_1351300
										OG0001869	PF3D7_1431100							OG0004514	PF3D7_1351600
										OG0005121	PF3D7_1431200							OG0002852	PF3D7_1351700
										OG0001868	PF3D7_1431300							OG0000603	PF3D7_1352100
										OG0003928	PF3D7_1431400							OG0002855	PF3D7_1352200
										OG0000488	PF3D7_1431500							OG0002857	PF3D7_1352700
										OG0001867	PF3D7_1431600							OG0002858	PF3D7_1352800
										OG0001866	PF3D7_1431700							OG0004983	PF3D7_1352900
										OG0003924	PF3D7_1432400							OG0002169	PF3D7_1354300
										OG0001864	PF3D7_1432500							OG0000519	PF3D7_1354800
										OG0001863	PF3D7_1432600							OG0004113	PF3D7_1354900
										OG0001858	PF3D7_1433100							OG0002173	PF3D7_1355200
										OG0001857	PF3D7_1433300							OG0002174	PF3D7_1355500
										OG0001856	PF3D7_1433500							OG0004979	PF3D7_1355600
										OG0001855	PF3D7_1433600							OG0004114	PF3D7_1355900
										OG0003921	PF3D7_1433700							OG0004115	PF3D7_1356000
										OG0003920	PF3D7_1433800							OG0002179	PF3D7_1356400
										OG0001849	PF3D7_1434500							OG0002180	PF3D7_1356700
										OG0003918	PF3D7_1435100							OG0002183	PF3D7_1357200
										OG0001844	PF3D7_1435200							OG0004119	PF3D7_1357400
										OG0001843	PF3D7_1435400							OG0000521	PF3D7_1357500
										OG0003915	PF3D7_1435600							OG0002185	PF3D7_1357700
										OG0000486	PF3D7_1435700							OG0002186	PF3D7_1357800
										OG0003913	PF3D7_1436100							OG0000522	PF3D7_1357900
										OG0005000	PF3D7_1436200							OG0002187	PF3D7_1358000
										OG0003911	PF3D7_1436400							OG0002188	PF3D7_1358100
										OG0001839	PF3D7_1436600							OG0004120	PF3D7_1358200
										OG0001189	PF3D7_1437600							OG0004121	PF3D7_1358300
										OG0003520	PF3D7_1437700							OG0004122	PF3D7_1358400
										OG0002525	PF3D7_1438700							OG0000523	PF3D7_1358600
										OG0002529	PF3D7_1439300							OG0002190	PF3D7_1358700
										OG0002533	PF3D7_1439800							OG0002193	PF3D7_1359000
										OG0000558	PF3D7_1439900							OG0002194	PF3D7_1359100
										OG0000559	PF3D7_1440200							OG0000313	PF3D7_1359300
										OG0002535	PF3D7_1440400							OG0004978	PF3D7_1359600
										OG0004305	PF3D7_1440500							OG0004124	PF3D7_1359700
										OG0004309	PF3D7_1440900							OG0002196	PF3D7_1359800
										OG0002537	PF3D7_1441200							OG0004127	PF3D7_1360500
										OG0004311	PF3D7_1441300							OG0004130	PF3D7_1361400
										OG0002545	PF3D7_1442500							OG0002208	PF3D7_1362100
										OG0002546	PF3D7_1442900							OG0002212	PF3D7_1362500
										OG0002547	PF3D7_1443000							OG0004132	PF3D7_1362600
										OG0002550	PF3D7_1443600							OG0004133	PF3D7_1362800
										OG0002552	PF3D7_1443900							OG0004134	PF3D7_1362900
										OG0002553	PF3D7_1444100							OG0004135	PF3D7_1363000
										OG0004322	PF3D7_1444400							OG0004136	PF3D7_1363100
										OG0004323	PF3D7_1444500							OG0002215	PF3D7_1363500
										OG0004324	PF3D7_1444700							OG0005106	PF3D7_1364100
										OG0004325	PF3D7_1444900							OG0004139	PF3D7_1364200
										OG0000561	PF3D7_1445000							OG0004140	PF3D7_1364400
										OG0000562	PF3D7_1445200							OG0002225	PF3D7_1365000
										OG0002558	PF3D7_1445700							OG0002230	PF3D7_1365600
										OG0002560	PF3D7_1446100							OG0002235	PF3D7_1366600
										OG0002561	PF3D7_1446300							OG0004144	PF3D7_1366700
										OG0004327	PF3D7_1446500							OG0002236	PF3D7_1366800
										OG0002565	PF3D7_1447000							OG0004145	PF3D7_1367300
										OG0002567	PF3D7_1447300							OG0004146	PF3D7_1367400
										OG0004330	PF3D7_1447400							OG0002241	PF3D7_1367500
										OG0002568	PF3D7_1447500							OG0004149	PF3D7_1368300
										OG0002569	PF3D7_1447600							OG0002248	PF3D7_1368700
										OG0002570	PF3D7_1447700							OG0002249	PF3D7_1368800
										OG0002572	PF3D7_1448000							OG0002252	PF3D7_1369400
										OG0002574	PF3D7_1448400							OG0004156	PF3D7_1369600
										OG0004992	PF3D7_1448500							OG0001999	PF3D7_1402700
										OG0002575	PF3D7_1448600							OG0004015	PF3D7_1402800
										OG0002577	PF3D7_1448800							OG0004014	PF3D7_1402900
										OG0002586	PF3D7_1450000							OG0004013	PF3D7_1403000
										OG0002588	PF3D7_1450300							OG0001998	PF3D7_1403100
										OG0002590	PF3D7_1450600							OG0004011	PF3D7_1403500
										OG0002593	PF3D7_1451100							OG0001996	PF3D7_1403700
										OG0004338	PF3D7_1451200							OG0004009	PF3D7_1403800
										OG0002597	PF3D7_1451600							OG0004008	PF3D7_1404000
										OG0002599	PF3D7_1451800							OG0000234	PF3D7_1404600
										OG0000566	PF3D7_1452000							OG0001992	PF3D7_1405100
										OG0004339	PF3D7_1452100							OG0001985	PF3D7_1406100
										OG0004341	PF3D7_1452400							OG0001978	PF3D7_1407100
										OG0002602	PF3D7_1452500							OG0001974	PF3D7_1407700
										OG0004342	PF3D7_1452800							OG0005006	PF3D7_1408300
										OG0002605	PF3D7_1452900							OG0000500	PF3D7_1408400
										OG0002606	PF3D7_1453100							OG0001968	PF3D7_1409300
										OG0004344	PF3D7_1453200							OG0001964	PF3D7_1410000
										OG0004345	PF3D7_1453400							OG0003993	PF3D7_1410100
										OG0004346	PF3D7_1453600							OG0001963	PF3D7_1410200
										OG0004349	PF3D7_1454200							OG0003988	PF3D7_1411100
										OG0000568	PF3D7_1454300							OG0003987	PF3D7_1411200
										OG0002610	PF3D7_1454400							OG0003986	PF3D7_1411500
										OG0000569	PF3D7_1454700							OG0003983	PF3D7_1412100
										OG0004351	PF3D7_1454900							OG0003982	PF3D7_1412200
										OG0000324	PF3D7_1455100							OG0001955	PF3D7_1412400
										OG0004352	PF3D7_1455300							OG0000498	PF3D7_1412900
										OG0002618	PF3D7_1455900							OG0003979	PF3D7_1413100
										OG0004354	PF3D7_1456000							OG0001951	PF3D7_1413400
										OG0004358	PF3D7_1456500							OG0003977	PF3D7_1414200
										OG0002620	PF3D7_1456700							OG0001940	PF3D7_1414900
										OG0002623	PF3D7_1457000							OG0005003	PF3D7_1415600
										OG0004360	PF3D7_1457400							OG0001933	PF3D7_1416100
										OG0000571	PF3D7_1457500							OG0001932	PF3D7_1416200
										OG0004362	PF3D7_1457700							OG0003973	PF3D7_1416400
										OG0004991	PF3D7_1459200							OG0005122	PF3D7_1416600
										OG0002635	PF3D7_1459600							OG0003971	PF3D7_1417100
										OG0002645	PF3D7_1460700							OG0003969	PF3D7_1417300
										OG0002646	PF3D7_1460800							OG0003967	PF3D7_1418200
										OG0002648	PF3D7_1461100							OG0003964	PF3D7_1419000
										OG0002649	PF3D7_1461200							OG0001921	PF3D7_1419100
										OG0002653	PF3D7_1461900							OG0003962	PF3D7_1419400
										OG0002655	PF3D7_1462700							OG0003960	PF3D7_1419600
										OG0004378	PF3D7_1463000							OG0001920	PF3D7_1419700
										OG0002660	PF3D7_1463900							OG0001918	PF3D7_1420000
										OG0002661	PF3D7_1464000							OG0001917	PF3D7_1420200
										OG0004383	PF3D7_1464500							OG0003959	PF3D7_1420500
										OG0000575	PF3D7_1464900							OG0001915	PF3D7_1420600
										OG0004387	PF3D7_1465400							OG0003958	PF3D7_1420700
										OG0004388	PF3D7_1465600							OG0001914	PF3D7_1420900
										OG0004389	PF3D7_1465700							OG0003954	PF3D7_1421800
										OG0004390	PF3D7_1465800							OG0003953	PF3D7_1421900
										OG0002668	PF3D7_1465900							OG0001908	PF3D7_1422200
										OG0002675	PF3D7_1466700							OG0003952	PF3D7_1422300
										OG0002676	PF3D7_1466800							OG0001907	PF3D7_1422400
										OG0002680	PF3D7_1467500							OG0001905	PF3D7_1422700
										OG0000576	PF3D7_1468300							OG0000492	PF3D7_1422800
										OG0004988	PF3D7_1468600							OG0001904	PF3D7_1422900
										OG0002688	PF3D7_1469100							OG0000491	PF3D7_1423000
										OG0002689	PF3D7_1469200							OG0003949	PF3D7_1423400
										OG0000326	PF3D7_1469600							OG0001901	PF3D7_1423800
										OG0002693	PF3D7_1470000							OG0001899	PF3D7_1424400
										OG0002695	PF3D7_1470400							OG0003946	PF3D7_1425300
										OG0004402	PF3D7_1470500							OG0000490	PF3D7_1425400
										OG0002696	PF3D7_1470600							OG0001897	PF3D7_1425700
										OG0004403	PF3D7_1470700							OG0004798	PF3D7_1425900
										OG0004404	PF3D7_1470800							OG0003944	PF3D7_1426500
										OG0004406	PF3D7_1471300							OG0004797	PF3D7_1426600
										OG0002700	PF3D7_1471400							OG0003943	PF3D7_1426700
										OG0002701	PF3D7_1471500							OG0003942	PF3D7_1426800
										OG0002702	PF3D7_1472000							OG0001893	PF3D7_1426900
										OG0002704	PF3D7_1472200							OG0003941	PF3D7_1427000
										OG0004408	PF3D7_1472400							OG0000301	PF3D7_1427100
										OG0004410	PF3D7_1472600							OG0003940	PF3D7_1427200
										OG0002706	PF3D7_1472700							OG0003939	PF3D7_1427300
										OG0004411	PF3D7_1472800							OG0001889	PF3D7_1427900
										OG0002711	PF3D7_1473700							OG0003935	PF3D7_1428200
										OG0000556	PF3D7_1474300							OG0003933	PF3D7_1428900
										OG0004296	PF3D7_1474700							OG0001884	PF3D7_1429100
										OG0000320	PF3D7_1475500							OG0003932	PF3D7_1429200
										OG0002514	PF3D7_1475700							OG0001883	PF3D7_1429300
										OG0004722	PF3D7_API03600							OG0001882	PF3D7_1429400
																		OG0001881	PF3D7_1429500
																		OG0003931	PF3D7_1429600
																		OG0001880	PF3D7_1429700
																		OG0001879	PF3D7_1429800
																		OG0003930	PF3D7_1429900
																		OG0001875	PF3D7_1430300
																		OG0001869	PF3D7_1431100
																		OG0005121	PF3D7_1431200
																		OG0001868	PF3D7_1431300
																		OG0003928	PF3D7_1431400
																		OG0000488	PF3D7_1431500
																		OG0001867	PF3D7_1431600
																		OG0001866	PF3D7_1431700
																		OG0003924	PF3D7_1432400
																		OG0001864	PF3D7_1432500
																		OG0001863	PF3D7_1432600
																		OG0001858	PF3D7_1433100
																		OG0003923	PF3D7_1433200
																		OG0001857	PF3D7_1433300
																		OG0001856	PF3D7_1433500
																		OG0001855	PF3D7_1433600
																		OG0003921	PF3D7_1433700
																		OG0003920	PF3D7_1433800
																		OG0001853	PF3D7_1434000
																		OG0001849	PF3D7_1434500
																		OG0003918	PF3D7_1435100
																		OG0001844	PF3D7_1435200
																		OG0001843	PF3D7_1435400
																		OG0003915	PF3D7_1435600
																		OG0000486	PF3D7_1435700
																		OG0003913	PF3D7_1436100
																		OG0005000	PF3D7_1436200
																		OG0003911	PF3D7_1436400
																		OG0001839	PF3D7_1436600
																		OG0003520	PF3D7_1437700
																		OG0002525	PF3D7_1438700
																		OG0002529	PF3D7_1439300
																		OG0002533	PF3D7_1439800
																		OG0000558	PF3D7_1439900
																		OG0004304	PF3D7_1440100
																		OG0002535	PF3D7_1440400
																		OG0004305	PF3D7_1440500
																		OG0004309	PF3D7_1440900
																		OG0002536	PF3D7_1441000
																		OG0004311	PF3D7_1441300
																		OG0002545	PF3D7_1442500
																		OG0002546	PF3D7_1442900
																		OG0002547	PF3D7_1443000
																		OG0002550	PF3D7_1443600
																		OG0002552	PF3D7_1443900
																		OG0002553	PF3D7_1444100
																		OG0004322	PF3D7_1444400
																		OG0004323	PF3D7_1444500
																		OG0004324	PF3D7_1444700
																		OG0004325	PF3D7_1444900
																		OG0000561	PF3D7_1445000
																		OG0000562	PF3D7_1445200
																		OG0002558	PF3D7_1445700
																		OG0002560	PF3D7_1446100
																		OG0002561	PF3D7_1446300
																		OG0004327	PF3D7_1446500
																		OG0002565	PF3D7_1447000
																		OG0002567	PF3D7_1447300
																		OG0004330	PF3D7_1447400
																		OG0002568	PF3D7_1447500
																		OG0002569	PF3D7_1447600
																		OG0002570	PF3D7_1447700
																		OG0002572	PF3D7_1448000
																		OG0002574	PF3D7_1448400
																		OG0004992	PF3D7_1448500
																		OG0002575	PF3D7_1448600
																		OG0002577	PF3D7_1448800
																		OG0002586	PF3D7_1450000
																		OG0002588	PF3D7_1450300
																		OG0002590	PF3D7_1450600
																		OG0002593	PF3D7_1451100
																		OG0004338	PF3D7_1451200
																		OG0002597	PF3D7_1451600
																		OG0002599	PF3D7_1451800
																		OG0000566	PF3D7_1452000
																		OG0004339	PF3D7_1452100
																		OG0004341	PF3D7_1452400
																		OG0002602	PF3D7_1452500
																		OG0002604	PF3D7_1452700
																		OG0002605	PF3D7_1452900
																		OG0004344	PF3D7_1453200
																		OG0004345	PF3D7_1453400
																		OG0004346	PF3D7_1453600
																		OG0004349	PF3D7_1454200
																		OG0000568	PF3D7_1454300
																		OG0002610	PF3D7_1454400
																		OG0004350	PF3D7_1454800
																		OG0004351	PF3D7_1454900
																		OG0000324	PF3D7_1455100
																		OG0004352	PF3D7_1455300
																		OG0002618	PF3D7_1455900
																		OG0004354	PF3D7_1456000
																		OG0004357	PF3D7_1456400
																		OG0004358	PF3D7_1456500
																		OG0002620	PF3D7_1456700
																		OG0004360	PF3D7_1457400
																		OG0000571	PF3D7_1457500
																		OG0004362	PF3D7_1457700
																		OG0004991	PF3D7_1459200
																		OG0002635	PF3D7_1459600
																		OG0004370	PF3D7_1460500
																		OG0002645	PF3D7_1460700
																		OG0002646	PF3D7_1460800
																		OG0002648	PF3D7_1461100
																		OG0002649	PF3D7_1461200
																		OG0002653	PF3D7_1461900
																		OG0002655	PF3D7_1462700
																		OG0004378	PF3D7_1463000
																		OG0002660	PF3D7_1463900
																		OG0002661	PF3D7_1464000
																		OG0004383	PF3D7_1464500
																		OG0000575	PF3D7_1464900
																		OG0002664	PF3D7_1465000
																		OG0004387	PF3D7_1465400
																		OG0004388	PF3D7_1465600
																		OG0004389	PF3D7_1465700
																		OG0004390	PF3D7_1465800
																		OG0002668	PF3D7_1465900
																		OG0004391	PF3D7_1466200
																		OG0002675	PF3D7_1466700
																		OG0002676	PF3D7_1466800
																		OG0002680	PF3D7_1467500
																		OG0000576	PF3D7_1468300
																		OG0004988	PF3D7_1468600
																		OG0002688	PF3D7_1469100
																		OG0002689	PF3D7_1469200
																		OG0000326	PF3D7_1469600
																		OG0002694	PF3D7_1470100
																		OG0002695	PF3D7_1470400
																		OG0004402	PF3D7_1470500
																		OG0002696	PF3D7_1470600
																		OG0004403	PF3D7_1470700
																		OG0004404	PF3D7_1470800
																		OG0004406	PF3D7_1471300
																		OG0002700	PF3D7_1471400
																		OG0002701	PF3D7_1471500
																		OG0004407	PF3D7_1471800
																		OG0002702	PF3D7_1472000
																		OG0002704	PF3D7_1472200
																		OG0004408	PF3D7_1472400
																		OG0004410	PF3D7_1472600
																		OG0002706	PF3D7_1472700
																		OG0004411	PF3D7_1472800
																		OG0004414	PF3D7_1473500
																		OG0002711	PF3D7_1473700
																		OG0000556	PF3D7_1474300
																		OG0004296	PF3D7_1474700
																		OG0000320	PF3D7_1475500
																		OG0002514	PF3D7_1475700
																		OG0004722	PF3D7_API03600
