# Supplementary material for: Single-cell RNA sequencing of Plasmodium vivax sporozoites reveals stage- and species-specific transcriptomic signatures
Source: PLoS Negl Trop Dis. 2022 Aug 4;16(8):e0010633. doi: 10.1371/journal.pntd.0010633 (PMC9380936; doi:10.1371/journal.pntd.0010633)
Supplement: S11 Table — (XLSX) [file pntd.0010633.s011.xlsx]

## Sheet: Sheet1
Supplementary Table S11. Genes diffentially expressed between P. vivax and P. falciparum sporozoites in each cluster.
Cluster	Orthogroup	P. vivax gene	P. falciparum gene	Proportion of sporozoites gene detected (P .vivax)	Proportion of sporozoites gene detected (P. falciparum)	Avg_log2FC	p_value	p_val_adj	Gene Description
ORTHO_C1	OG0004551	PVP01_1413500	PF3D7_1312500	0.875	0.023	5.85	6.3e-33	1.93e-29	conserved Plasmodium protein, unknown function
ORTHO_C1	OG0000925	PVP01_0835700	PF3D7_0304500	0.839	0.045	5.9	9.05e-30	2.78e-26	1-cys-glutaredoxin-like protein-1
ORTHO_C1	OG0000645	PVP01_1460700	PF3D7_1243600	0.893	0.114	6.68	2.56e-29	7.85e-26	translation initiation factor SUI1, putative
ORTHO_C1	OG0003546	PVP01_0317600	PF3D7_0721900	0.714	0.008	5.98	1.33e-26	4.09e-23	V-type ATPase V0 subunit e, putative
ORTHO_C1	OG0004334	PVP01_1258000	PF3D7_1449000	0.929	0.152	3.65	8.42e-26	2.58e-22	gamete egress and sporozoite traversal protein, putative
ORTHO_C1	OG0002092	PVP01_1131800	PF3D7_0617300	0.696	0.015	5.42	3.37e-25	1.03e-21	conserved Plasmodium protein, unknown function
ORTHO_C1	OG0000441	PVP01_0723900	PF3D7_0925400	0.679	0.008	5.59	4.99e-25	1.53e-21	protein phosphatase-beta
ORTHO_C1	OG0004480	PVP01_1212300	PF3D7_1342500	0.964	0.447	3.69	3.42e-24	1.05e-20	sporozoite protein essential for cell traversal
ORTHO_C1	OG0003668	PVP01_0710400	PF3D7_0911900	0.929	0.318	3.71	1.19e-23	3.66e-20	falstatin
ORTHO_C1	OG0002975	PVP01_1422800	PF3D7_0713700	0.643	0.008	4.96	4.79e-23	1.47e-19	conserved Plasmodium protein, unknown function
ORTHO_C1	OG0003822	PVP01_0927900	PF3D7_1127200	0.732	0.076	5.59	7.11e-23	2.18e-19	conserved Plasmodium protein, unknown function
ORTHO_C1	OG0002454	PVP01_1014200	PF3D7_0519700	0.643	0.023	5.65	3e-22	9.22e-19	FoP domain-containing protein, putative
ORTHO_C1	OG0004770	PVP01_0611700	PF3D7_1026500	0.929	0.652	6.21	6.2e-22	1.9e-18	conserved Plasmodium protein, unknown function
ORTHO_C1	OG0003368	PVP01_0835600	PF3D7_0304600	0.964	0.992	-2.45	1.03e-20	3.16e-17	circumsporozoite (CS) protein
ORTHO_C1	OG0004260	PVP01_1011800	PF3D7_0522100	0.571	0.015	5.15	7.76e-20	2.38e-16	conserved Plasmodium protein, unknown function
ORTHO_C1	OG0001551	PVP01_0730900	PF3D7_0932200	0.732	0.167	4.62	1.12e-18	3.44e-15	profilin
ORTHO_C1	OG0002663	PVP01_1242100	PF3D7_1464700	0.536	0.015	4.93	2.24e-18	6.87e-15	ATP synthase (C/AC39) subunit, putative
ORTHO_C1	OG0004944	PVP01_0933800	PF3D7_1133000	0.536	0.015	5.28	2.24e-18	6.87e-15	conserved Plasmodium protein, unknown function
ORTHO_C1	OG0000300	PVP01_1315100	PF3D7_1434400	0.714	0.136	3.85	6.67e-18	2.05e-14	conserved protein, unknown function
ORTHO_C1	OG0004964	PVP01_0602100	PF3D7_1016900	0.5	0.008	5.69	1.24e-17	3.8e-14	early transcribed membrane protein 10.3
ORTHO_C1	OG0000620	PVP01_1432200	PF3D7_1213400	0.625	0.091	5.3	5.58e-17	1.71e-13	kelch domain-containing protein, putative
ORTHO_C1	OG0002800	PVP01_1213900	PF3D7_1340900	0.607	0.076	4.52	1.5e-16	4.6e-13	sodium-dependent phosphate transporter
ORTHO_C1	OG0001406	PVP01_0108700	PF3D7_0708400	0.518	0.038	4.78	1.59e-15	4.86e-12	heat shock protein 90
ORTHO_C1	OG0004044	PVP01_1022600	PF3D7_0511400	0.875	0.402	2.22	2.04e-15	6.25e-12	conserved Plasmodium protein, unknown function
ORTHO_C1	OG0004805	PVP01_1117100	PF3D7_1354700	0.268	0.909	-2.59	1.19e-14	3.65e-11	conserved Plasmodium protein, unknown function
ORTHO_C1	OG0002201	PVP01_1111200	PF3D7_1360800	0.625	0.114	2.98	2.5e-14	7.67e-11	falcilysin
ORTHO_C1	OG0002153	PVP01_1120200	PF3D7_0629300	0.518	0.053	2.85	5.82e-14	1.79e-10	phospholipase, putative
ORTHO_C1	OG0002170	PVP01_1117400	PF3D7_1354400	0.518	0.061	3.27	1.46e-13	4.48e-10	V-type proton ATPase 21 kDa proteolipid subunit, putative
ORTHO_C1	OG0000592	PVP01_1218700	PF3D7_1335900	0.357	0.909	-2.87	3.47e-13	1.06e-09	thrombospondin-related anonymous protein
ORTHO_C1	OG0001076	PVP01_0615300	PF3D7_1030200	0.536	0.076	3.08	6.51e-13	2e-09	claudin-like apicomplexan microneme protein, putative
ORTHO_C1	OG0000690	PVP01_1144400	PF3D7_0604500	0.5	0.076	4.29	1.01e-12	3.09e-09	GYF domain-containing protein, putative
ORTHO_C1	OG0002283	PVP01_0806900	PF3D7_1007200	0.518	0.068	3	1.61e-12	4.93e-09	rho GTPase-activating protein, putative
ORTHO_C1	OG0003917	PVP01_1314200	PF3D7_1435300	0.607	0.136	2.49	9.09e-12	2.79e-08	glutamate synthase [NADH], putative
ORTHO_C1	OG0001045	PVP01_0609100	PF3D7_1023900	0.161	0.727	-3.55	9.95e-12	3.05e-08	chromodomain-helicase-DNA-binding protein 1 homolog, putative
ORTHO_C1	OG0003890	PVP01_0304200	PF3D7_0404800	0.375	0.924	-1.63	1.73e-11	5.32e-08	sporozoite-specific protein S10, putative
ORTHO_C1	OG0002901	PVP01_1411700	PF3D7_1310700	0.643	0.265	3.09	2.57e-11	7.89e-08	RNA-binding protein, putative
ORTHO_C1	OG0000871	PVP01_0412300	PF3D7_0212600	0.804	0.515	2.28	3.08e-11	9.44e-08	secreted protein with altered thrombospondin repeat domain
ORTHO_C1	OG0004922	PVP01_1456100	PF3D7_1238000	0.696	0.303	2.86	3.17e-11	9.71e-08	COPI associated protein, putative
ORTHO_C1	OG0004017	PVP01_1032700	PF3D7_0502300	0.518	0.114	3.09	1.04e-10	3.18e-07	conserved Plasmodium protein, unknown function
ORTHO_C1	OG0001707	PVP01_0921600	PF3D7_1121000	0.554	0.129	2.34	1.18e-10	3.63e-07	palmitoyltransferase DHHC3
ORTHO_C1	OG0004228	PVP01_0112200	PF3D7_0808200	0.536	0.129	1.51	3.28e-10	1.01e-06	plasmepsin X
ORTHO_C1	OG0002685	PVP01_1238400	PF3D7_1468400	0.161	0.652	-3.24	3.93e-10	1.21e-06	zinc finger protein, putative
ORTHO_C1	OG0003785	PVP01_0938800	PF3D7_1137800	0.804	0.424	2.03	8.1e-10	2.48e-06	sporozoite surface protein essential for liver stage development, putative
ORTHO_C1	OG0004293	PVP01_1270300	PF3D7_1475400	0.214	0.705	-2.8	9.15e-10	2.81e-06	cysteine repeat modular protein 4
ORTHO_C1	OG0001137	PVP01_1301900	PF3D7_1202600	0.214	0.727	-2.38	1.47e-09	4.5e-06	nuclear export mediator factor NEMF, putative
ORTHO_C1	OG0003003	PVP01_1427300	PF3D7_0813000	0.589	0.265	3.93	2.34e-09	7.17e-06	protein KIC7
ORTHO_C1	OG0001631	PVP01_0934200	PF3D7_1133400	0.696	0.273	1.35	2.36e-09	7.26e-06	apical membrane antigen 1
ORTHO_C1	OG0002449	PVP01_1014700	PF3D7_0519200	0.679	0.447	3.6	2.49e-09	7.64e-06	V-type proton ATPase 16 kDa proteolipid subunit
ORTHO_C1	OG0001812	PVP01_0305100	PF3D7_0405700	0.643	0.227	1.54	3.46e-09	1.06e-05	lysine decarboxylase, putative
ORTHO_C1	OG0003467	PVP01_0618200	PF3D7_1033100	0.161	0.598	-3.35	1.66e-08	5.1e-05	S-adenosylmethionine decarboxylase/ornithine decarboxylase
ORTHO_C1	OG0000420	PVP01_0516700	PF3D7_0818600	0.625	0.25	1.89	2.44e-08	7.49e-05	BEM46-like protein, putative
ORTHO_C1	OG0001164	PVP01_1307300	PF3D7_1208200	0.107	0.583	-2.12	4.47e-08	0.000137	cysteine repeat modular protein 3
ORTHO_C1	OG0001263	PVP01_0505600	PF3D7_0828800	0.714	0.318	1.14	1.2e-07	0.00036711	GPI-anchored micronemal antigen
ORTHO_C1	OG0003189	PVP01_1461700	PF3D7_1244600	0.607	0.189	0.72	3.29e-07	0.00100822	ADP-ribosylation factor GTPase-activating protein 1
ORTHO_C1	OG0002400	PVP01_0117400	PF3D7_0802800	0.5	0.136	1.34	4.54e-07	0.00139416	serine/threonine protein phosphatase 2B catalytic subunit A
ORTHO_C1	OG0003549	PVP01_0319000	PF3D7_0723300	0.482	0.826	-1.97	4.61e-07	0.00141525	conserved protein, unknown function
ORTHO_C1	OG0002308	PVP01_0811600	PF3D7_1011500	0.589	0.311	2.34	1.21e-06	0.00371024	conserved protein, unknown function
ORTHO_C1	OG0004064	PVP01_1132600	PF3D7_0616500	0.375	0.659	-2.73	1.46e-06	0.00447262	TRAP-like protein
ORTHO_C1	OG0002407	PVP01_0118300	PF3D7_0801900	0.196	0.606	-2.04	2.48e-06	0.0076189	lysine-specific histone demethylase, putative
ORTHO_C1	OG0004436	PVP01_1227100	PF3D7_1327300	0.214	0.621	-1.95	5.51e-06	0.0168911	conserved Plasmodium protein, unknown function
ORTHO_C1	OG0001694	PVP01_0923400	PF3D7_1122800	0.518	0.258	2.24	5.64e-06	0.0173078	calcium-dependent protein kinase 6
ORTHO_C2	OG0004805	PVP01_1117100	PF3D7_1354700	0.042	0.927	-5.31	4.56e-250	1.4e-246	conserved Plasmodium protein, unknown function
ORTHO_C2	OG0003437	PVP01_0609000	PF3D7_1023800	0.003	0.728	-7.45	2.35e-197	7.21e-194	conserved Plasmodium protein, unknown function
ORTHO_C2	OG0003753	PVP01_0947600	PF3D7_1147000	0.084	0.854	-4.59	3.29e-194	1.01e-190	sporozoite and liver stage asparagine-rich protein
ORTHO_C2	OG0003368	PVP01_0835600	PF3D7_0304600	0.996	0.998	-1.84	7.41e-187	2.27e-183	circumsporozoite (CS) protein
ORTHO_C2	OG0004551	PVP01_1413500	PF3D7_1312500	0.874	0.002	5.98	3.07e-186	9.41e-183	conserved Plasmodium protein, unknown function
ORTHO_C2	OG0004064	PVP01_1132600	PF3D7_0616500	0.683	0.983	-3.32	1.67e-182	5.13e-179	TRAP-like protein
ORTHO_C2	OG0004612	PVP01_1435400	PF3D7_1216600	0.425	0.934	-4	1.83e-182	5.61e-179	cell traversal protein for ookinetes and sporozoites
ORTHO_C2	OG0000645	PVP01_1460700	PF3D7_1243600	0.876	0.058	6.08	2.82e-182	8.66e-179	translation initiation factor SUI1, putative
ORTHO_C2	OG0003668	PVP01_0710400	PF3D7_0911900	0.943	0.152	3.5	7.21e-177	2.21e-173	falstatin
ORTHO_C2	OG0001518	PVP01_0723700	PF3D7_0925200	0.027	0.741	-3.31	1.59e-175	4.88e-172	ribosomal RNA-processing protein 8, putative
ORTHO_C2	OG0004480	PVP01_1212300	PF3D7_1342500	0.966	0.437	3.09	4.73e-172	1.45e-168	sporozoite protein essential for cell traversal
ORTHO_C2	OG0000925	PVP01_0835700	PF3D7_0304500	0.815	0.036	5.61	7.2e-162	2.21e-158	1-cys-glutaredoxin-like protein-1
ORTHO_C2	OG0000300	PVP01_1315100	PF3D7_1434400	0.837	0.107	4.26	2.55e-154	7.82e-151	conserved protein, unknown function
ORTHO_C2	OG0003856	PVP01_0912900	PF3D7_1112100	0.013	0.614	-4.5	7.65e-149	2.35e-145	conserved Plasmodium protein, unknown function
ORTHO_C2	OG0002751	PVP01_1225100	PF3D7_1329400	0.749	0.006	5.15	1.73e-144	5.31e-141	AMP deaminase
ORTHO_C2	OG0003546	PVP01_0317600	PF3D7_0721900	0.729	0.004	5.66	7.16e-141	2.2e-137	V-type ATPase V0 subunit e, putative
ORTHO_C2	OG0001421	PVP01_0705700	PF3D7_0907200	0.001	0.546	-0.41	9.79e-139	3e-135	GTPase-activating protein, putative
ORTHO_C2	OG0003822	PVP01_0927900	PF3D7_1127200	0.718	0.002	5.7	8.53e-138	2.62e-134	conserved Plasmodium protein, unknown function
ORTHO_C2	OG0002956	PVP01_1419600	PF3D7_1318700	0.02	0.559	-5.52	1.64e-130	5.02e-127	protein AAP4, putative
ORTHO_C2	OG0004770	PVP01_0611700	PF3D7_1026500	0.819	0.462	5.47	4.33e-125	1.33e-121	conserved Plasmodium protein, unknown function
ORTHO_C2	OG0004259	PVP01_1011900	PF3D7_0522000	0.674	0.006	5.65	5.51e-125	1.69e-121	conserved Plasmodium protein, unknown function
ORTHO_C2	OG0002308	PVP01_0811600	PF3D7_1011500	0.691	0.043	4.88	6.37e-121	1.96e-117	conserved protein, unknown function
ORTHO_C2	OG0004964	PVP01_0602100	PF3D7_1016900	0.667	0.034	5.87	3.43e-118	1.05e-114	early transcribed membrane protein 10.3
ORTHO_C2	OG0002092	PVP01_1131800	PF3D7_0617300	0.644	0.009	5.41	4.68e-116	1.44e-112	conserved Plasmodium protein, unknown function
ORTHO_C2	OG0004771	PVP01_0613700	PF3D7_1028600	0.634	0.004	5.26	2.52e-114	7.74e-111	conserved Plasmodium protein, unknown function
ORTHO_C2	OG0004260	PVP01_1011800	PF3D7_0522100	0.629	0.002	5.53	1.49e-113	4.56e-110	conserved Plasmodium protein, unknown function
ORTHO_C2	OG0002201	PVP01_1111200	PF3D7_1360800	0.695	0.09	3.66	5.46e-112	1.68e-108	falcilysin
ORTHO_C2	OG0004334	PVP01_1258000	PF3D7_1449000	0.985	0.574	1.52	4.73e-111	1.45e-107	gamete egress and sporozoite traversal protein, putative
ORTHO_C2	OG0002454	PVP01_1014200	PF3D7_0519700	0.654	0.111	5.03	6.19e-102	1.9e-98	FoP domain-containing protein, putative
ORTHO_C2	OG0002975	PVP01_1422800	PF3D7_0713700	0.588	0.004	4.72	1.45e-101	4.46e-98	conserved Plasmodium protein, unknown function
ORTHO_C2	OG0002901	PVP01_1411700	PF3D7_1310700	0.622	0.077	4.49	1.3e-97	3.98e-94	RNA-binding protein, putative
ORTHO_C2	OG0004668	PVP01_1453200	PF3D7_1235100	0.612	0.071	4.84	1.49e-95	4.57e-92	conserved protein, unknown function
ORTHO_C2	OG0001263	PVP01_0505600	PF3D7_0828800	0.706	0.109	2.24	5.59e-95	1.72e-91	GPI-anchored micronemal antigen
ORTHO_C2	OG0004044	PVP01_1022600	PF3D7_0511400	0.872	0.448	1.86	5.16e-93	1.58e-89	conserved Plasmodium protein, unknown function
ORTHO_C2	OG0000620	PVP01_1432200	PF3D7_1213400	0.611	0.073	4.15	9.18e-93	2.82e-89	kelch domain-containing protein, putative
ORTHO_C2	OG0003414	PVP01_0602700	PF3D7_1017500	0.607	0.101	3.83	2.82e-87	8.64e-84	myosin essential light chain ELC
ORTHO_C2	OG0002663	PVP01_1242100	PF3D7_1464700	0.537	0.015	4.5	3.22e-87	9.89e-84	ATP synthase (C/AC39) subunit, putative
ORTHO_C2	OG0000592	PVP01_1218700	PF3D7_1335900	0.398	0.976	-2.54	3.55e-86	1.09e-82	thrombospondin-related anonymous protein
ORTHO_C2	OG0004922	PVP01_1456100	PF3D7_1238000	0.799	0.388	2.19	1.63e-84	5e-81	COPI associated protein, putative
ORTHO_C2	OG0000441	PVP01_0723900	PF3D7_0925400	0.502	0.002	4.81	4.85e-83	1.49e-79	protein phosphatase-beta
ORTHO_C2	OG0000871	PVP01_0412300	PF3D7_0212600	0.771	0.306	2.07	9.05e-83	2.78e-79	secreted protein with altered thrombospondin repeat domain
ORTHO_C2	OG0002800	PVP01_1213900	PF3D7_1340900	0.554	0.056	2.99	1.7e-79	5.21e-76	sodium-dependent phosphate transporter
ORTHO_C2	OG0002289	PVP01_0807700	PF3D7_1008000	0.509	0.017	4.06	3.06e-79	9.37e-76	histone deacetylase 2
ORTHO_C2	OG0003348	PVP01_0410300	PF3D7_0214600	0.114	0.546	-3.3	8.96e-73	2.75e-69	serine/threonine protein kinase STK2, putative
ORTHO_C2	OG0003467	PVP01_0618200	PF3D7_1033100	0.156	0.55	-4	4e-72	1.23e-68	S-adenosylmethionine decarboxylase/ornithine decarboxylase
ORTHO_C2	OG0002153	PVP01_1120200	PF3D7_0629300	0.642	0.197	2.56	9.77e-72	3e-68	phospholipase, putative
ORTHO_C2	OG0004004	PVP01_1343900	PF3D7_1404900	0.587	0.111	2.57	1.4e-71	4.29e-68	conserved Plasmodium protein, unknown function
ORTHO_C2	OG0003003	PVP01_1427300	PF3D7_0813000	0.584	0.188	4.61	1.18e-69	3.63e-66	protein KIC7
ORTHO_C2	OG0002400	PVP01_0117400	PF3D7_0802800	0.626	0.131	1.53	1.84e-68	5.64e-65	serine/threonine protein phosphatase 2B catalytic subunit A
ORTHO_C2	OG0003605	PVP01_0526500	PF3D7_0417100	0.547	0.092	2.61	1.66e-67	5.1e-64	mRNA-binding protein PUF2
ORTHO_C2	OG0001631	PVP01_0934200	PF3D7_1133400	0.661	0.171	1.27	9.26e-65	2.84e-61	apical membrane antigen 1
ORTHO_C2	OG0000420	PVP01_0516700	PF3D7_0818600	0.548	0.098	2.35	3.49e-64	1.07e-60	BEM46-like protein, putative
ORTHO_C2	OG0001694	PVP01_0923400	PF3D7_1122800	0.68	0.199	1.21	5.89e-64	1.81e-60	calcium-dependent protein kinase 6
ORTHO_C2	OG0002449	PVP01_1014700	PF3D7_0519200	0.586	0.221	3.36	5.19e-62	1.59e-58	V-type proton ATPase 16 kDa proteolipid subunit
ORTHO_C2	OG0001045	PVP01_0609100	PF3D7_1023900	0.176	0.58	-2.93	4.03e-61	1.24e-57	chromodomain-helicase-DNA-binding protein 1 homolog, putative
ORTHO_C2	OG0003549	PVP01_0319000	PF3D7_0723300	0.671	0.944	-1.67	1.63e-59	5.01e-56	conserved protein, unknown function
ORTHO_C2	OG0001551	PVP01_0730900	PF3D7_0932200	0.641	0.328	2.46	5.34e-58	1.64e-54	profilin
ORTHO_C2	OG0002142	PVP01_1122200	PF3D7_0627300	0.18	0.694	-0.68	4.51e-57	1.38e-53	E3 ubiquitin-protein ligase RNF5, putative
ORTHO_C2	OG0003675	PVP01_0712500	PF3D7_0914100	0.594	0.171	1.64	2.93e-54	8.99e-51	conserved Plasmodium protein, unknown function
ORTHO_C2	OG0004384	PVP01_1242200	PF3D7_1464600	0.672	0.25	0.81	4.8e-48	1.47e-44	serine/threonine protein phosphatase UIS2, putative
ORTHO_C2	OG0001137	PVP01_1301900	PF3D7_1202600	0.237	0.617	-1.92	8.48e-47	2.6e-43	nuclear export mediator factor NEMF, putative
ORTHO_C2	OG0001592	PVP01_0943000	PF3D7_1142300	0.237	0.6	-2.28	6.4e-45	1.96e-41	conserved Plasmodium membrane protein, unknown function
ORTHO_C2	OG0003130	PVP01_1450600	PF3D7_1232400	0.204	0.743	2.49	8.54e-45	2.62e-41	CWC16 domain-containing protein, putative
ORTHO_C2	OG0004436	PVP01_1227100	PF3D7_1327300	0.202	0.559	-2.28	1.55e-41	4.76e-38	conserved Plasmodium protein, unknown function
ORTHO_C2	OG0003785	PVP01_0938800	PF3D7_1137800	0.871	0.565	0.75	6.09e-37	1.87e-33	sporozoite surface protein essential for liver stage development, putative
ORTHO_C2	OG0004985	PVP01_1210400	PF3D7_1344400	0.53	0.319	1.85	6.25e-30	1.92e-26	conserved Plasmodium protein, unknown function
ORTHO_C2	OG0003189	PVP01_1461700	PF3D7_1244600	0.639	0.608	-1.17	1.58e-11	4.84e-08	ADP-ribosylation factor GTPase-activating protein 1
ORTHO_C3	OG0000925	PVP01_0835700	PF3D7_0304500	0.644	0.012	5.78	3.79e-77	1.16e-73	1-cys-glutaredoxin-like protein-1
ORTHO_C3	OG0003546	PVP01_0317600	PF3D7_0721900	0.525	0.002	5.87	2.13e-66	6.53e-63	V-type ATPase V0 subunit e, putative
ORTHO_C3	OG0003822	PVP01_0927900	PF3D7_1127200	0.517	0.006	5.75	5.25e-63	1.61e-59	conserved Plasmodium protein, unknown function
ORTHO_C3	OG0000645	PVP01_1460700	PF3D7_1243600	0.695	0.075	6.48	1.56e-62	4.79e-59	translation initiation factor SUI1, putative
ORTHO_C3	OG0000300	PVP01_1315100	PF3D7_1434400	0.61	0.038	5.48	4.73e-61	1.45e-57	conserved protein, unknown function
ORTHO_C3	OG0004771	PVP01_0613700	PF3D7_1028600	0.534	0.021	5.33	1.83e-57	5.62e-54	conserved Plasmodium protein, unknown function
ORTHO_C3	OG0004668	PVP01_1453200	PF3D7_1235100	0.508	0.027	5.31	2.09e-51	6.43e-48	conserved protein, unknown function
ORTHO_C3	OG0004480	PVP01_1212300	PF3D7_1342500	0.763	0.173	4.17	8.36e-51	2.57e-47	sporozoite protein essential for cell traversal
ORTHO_C3	OG0003668	PVP01_0710400	PF3D7_0911900	0.686	0.132	3.48	2.36e-44	7.23e-41	falstatin
ORTHO_C3	OG0003368	PVP01_0835600	PF3D7_0304600	0.873	0.967	-2.06	1.96e-38	6.01e-35	circumsporozoite (CS) protein
ORTHO_C3	OG0004334	PVP01_1258000	PF3D7_1449000	0.788	0.25	2.46	3.27e-36	1e-32	gamete egress and sporozoite traversal protein, putative
ORTHO_C3	OG0004770	PVP01_0611700	PF3D7_1026500	0.686	0.25	5.77	8.2e-35	2.52e-31	conserved Plasmodium protein, unknown function
ORTHO_C3	OG0004805	PVP01_1117100	PF3D7_1354700	0.017	0.697	-5.1	2.45e-33	7.51e-30	conserved Plasmodium protein, unknown function
ORTHO_C3	OG0004612	PVP01_1435400	PF3D7_1216600	0.28	0.793	-3.59	5.6e-31	1.72e-27	cell traversal protein for ookinetes and sporozoites
ORTHO_C3	OG0000871	PVP01_0412300	PF3D7_0212600	0.602	0.155	2.59	8.12e-29	2.49e-25	secreted protein with altered thrombospondin repeat domain
ORTHO_C3	OG0004064	PVP01_1132600	PF3D7_0616500	0.195	0.745	-3.65	1.76e-28	5.4e-25	TRAP-like protein
ORTHO_C3	OG0004922	PVP01_1456100	PF3D7_1238000	0.636	0.228	3.19	8.53e-27	2.62e-23	COPI associated protein, putative
ORTHO_C3	OG0003815	PVP01_0929800	PF3D7_1129100	0.144	0.672	-5.16	1.13e-26	3.47e-23	parasitophorous vacuolar protein 1
ORTHO_C3	OG0001518	PVP01_0723700	PF3D7_0925200	0.017	0.599	-3.39	1.05e-25	3.21e-22	ribosomal RNA-processing protein 8, putative
ORTHO_C3	OG0000592	PVP01_1218700	PF3D7_1335900	0.212	0.862	-2.48	6.1e-25	1.87e-21	thrombospondin-related anonymous protein
ORTHO_C3	OG0004044	PVP01_1022600	PF3D7_0511400	0.619	0.203	2.18	2.88e-24	8.85e-21	conserved Plasmodium protein, unknown function
ORTHO_C3	OG0003130	PVP01_1450600	PF3D7_1232400	0.051	0.585	0.6	2.63e-20	8.06e-17	CWC16 domain-containing protein, putative
ORTHO_C3	OG0002142	PVP01_1122200	PF3D7_0627300	0.076	0.601	-0.95	1.67e-18	5.12e-15	E3 ubiquitin-protein ligase RNF5, putative
ORTHO_C3	OG0003467	PVP01_0618200	PF3D7_1033100	0.11	0.551	-4.23	1.96e-18	6.01e-15	S-adenosylmethionine decarboxylase/ornithine decarboxylase
ORTHO_C3	OG0004436	PVP01_1227100	PF3D7_1327300	0.127	0.585	-2.79	1.51e-16	4.63e-13	conserved Plasmodium protein, unknown function
ORTHO_C3	OG0003549	PVP01_0319000	PF3D7_0723300	0.314	0.743	-1.42	5.8e-12	1.78e-08	conserved protein, unknown function
ORTHO_C3	OG0001137	PVP01_1301900	PF3D7_1202600	0.161	0.501	-1.85	3.32e-10	1.02e-06	nuclear export mediator factor NEMF, putative
