# Supplementary material for: Single-cell RNA sequencing of Plasmodium vivax sporozoites reveals stage- and species-specific transcriptomic signatures
Source: PLoS Negl Trop Dis. 2022 Aug 4;16(8):e0010633. doi: 10.1371/journal.pntd.0010633 (PMC9380936; doi:10.1371/journal.pntd.0010633)
Supplement: S12 Table — Positive avg_log2FC: greater expression in ORTHO_C4 (P. vivax specific). (XLSX) [file pntd.0010633.s012.xlsx]

## Sheet: Sheet1
Supplementary Table S12. Genes differentially expressed between sporozoites in clusters ORTHO_C3 and ORTHO_C4. Positive avg_log 2FC: greater expression in ORTHO_C4 (P. vivax specific).
Orthogroup	avg log2FC	proportion of cells gene detected in ORTHO_C4	proportion of cells gene detected in ORTHO_C3	p value	adj p val	Detection difference (ORTHO_C4-ORTHO_C3)	P. vivax Gene::Description	P. falciparum Gene::Description	Classification in Gural et al. 2018	Classification in VSC 2019	Classification in Roth et al. 2018
OG0000265	2.7813	0.401	0.072	1.43227e-39	4.39421e-36	0.329	PVP01_1405400::small heat shock protein, putative	PF3D7_1304500::small heat shock protein, putative	hypnozoite	sporozoite	LiverStageEarly
OG0000289	-6.21657	0	0.288	1.28924e-30	3.95538e-27	-0.288	PVP01_1310200::kinesin-X3, putative	PF3D7_1211000::kinesin-X3, putative	NA	sporozoite	NA
OG0000300	2.11891	0.424	0.144	2.06023e-27	6.32077e-24	0.28	PVP01_1315100::conserved protein, unknown function	PF3D7_1434400::conserved protein, unknown function	mixedLS	sporozoite	InsectStageFinal
OG0000301	-3.69451	0	0.263	1.15412e-27	3.54084e-24	-0.263	PVP01_1322200::lipase, putative	PF3D7_1427100::lipase, putative	NA	sporozoite	LiverStageEarly
OG0000474	2.99756	0.461	0.07	1.41674e-50	4.34656e-47	0.391	PVP01_0914900::rhomboid protease ROM1, putative	PF3D7_1114100::rhomboid protease ROM1	NA	sporozoite	NA
OG0000563	2.8786	0.288	0.042	9.19447e-30	2.82086e-26	0.246	PVP01_1260400::centrin-2, putative	PF3D7_1446600::centrin-2	NA	sporozoite	InsectStageFinal
OG0000592	-2.29856	0.141	0.742	1.18076e-57	3.62258e-54	-0.601	PVP01_1218700::thrombospondin-related anonymous protein, putative	PF3D7_1335900::thrombospondin-related anonymous protein	NA	sporozoite	InsectStageFinal
OG0000616	2.83336	0.251	0.041	1.22847e-24	3.76894e-21	0.21	PVP01_1425500::superoxide dismutase [Fe], putative	PF3D7_0814900::superoxide dismutase [Fe]	hypnozoite	sporozoite	LiverStageEarly
OG0000620	3.00767	0.537	0.113	2.51804e-55	7.72533e-52	0.424	PVP01_1432200::kelch domain-containing protein, putative	PF3D7_1213400::kelch domain-containing protein, putative	hypnozoite	sporozoite	InsectStageFinal
OG0000645	1.94213	0.547	0.189	2.44135e-35	7.49007e-32	0.358	PVP01_1460700::translation initiation factor SUI1, putative	PF3D7_1243600::translation initiation factor SUI1, putative	mixedLS	sporozoite	NA
OG0000847	2.3937	0.301	0.077	4.9147e-23	1.50783e-19	0.224	PVP01_0418100::iron-sulfur assembly protein, putative	PF3D7_0207200::iron-sulfur assembly protein, putative	NA	sporozoite	NA
OG0000871	2.34381	0.652	0.238	1.06908e-51	3.27994e-48	0.414	PVP01_0412300::secreted protein with altered thrombospondin repeat domain, putative	PF3D7_0212600::secreted protein with altered thrombospondin repeat domain	NA	sporozoite	InsectStageFinal
OG0000925	2.7856	0.668	0.128	5.39868e-73	1.65631e-69	0.54	PVP01_0835700::1-cys-glutaredoxin-like protein-1, putative	PF3D7_0304500::1-cys-glutaredoxin-like protein-1	NA	sporozoite	NA
OG0001034	-3.33557	0.005	0.299	1.84421e-30	5.65804e-27	-0.294	PVP01_0607100::PHAX domain-containing protein, putative	PF3D7_1021900::PHAX domain-containing protein, putative	mixedLS	blood-stage	NA
OG0001045	-2.95648	0.039	0.377	1.01293e-31	3.10768e-28	-0.338	PVP01_0609100::chromodomain-helicase-DNA-binding protein 1 homolog, putative	PF3D7_1023900::chromodomain-helicase-DNA-binding protein 1 homolog, putative	mixedLS	sporozoite	NA
OG0001076	2.56595	0.335	0.067	9.74917e-31	2.99104e-27	0.268	PVP01_0615300::claudin-like apicomplexan microneme protein, putative	PF3D7_1030200::claudin-like apicomplexan microneme protein, putative	mixedLS	sporozoite	InsectStageFinal
OG0001077	-2.56064	0.026	0.291	1.73923e-24	5.33595e-21	-0.265	PVP01_0615400::conserved Plasmodium protein, unknown function	PF3D7_1030300::conserved Plasmodium protein, unknown function	NA	sporozoite	NA
OG0001094	2.92253	0.309	0.049	1.72995e-31	5.30748e-28	0.26	PVP01_0618400::conserved protein, unknown function	PF3D7_1033300::conserved protein, unknown function	NA	sporozoite	NA
OG0001137	-3.06409	0.034	0.438	1.25395e-40	3.8471e-37	-0.404	PVP01_1301900::nuclear export mediator factor NEMF, putative	PF3D7_1202600::nuclear export mediator factor NEMF, putative	mixedLS	sporozoite	NA
OG0001263	1.42989	0.416	0.189	3.89737e-18	1.19571e-14	0.227	PVP01_0505600::GPI-anchored micronemal antigen	PF3D7_0828800::GPI-anchored micronemal antigen	mixedLS	sporozoite	InsectStageFinal
OG0001421	-0.26136	0.005	0.443	2.79662e-49	8.58003e-46	-0.438	PVP01_0705700::GTPase-activating protein, putative	PF3D7_0907200::GTPase-activating protein, putative	NA	sporozoite	NA
OG0001444	-3.86214	0.003	0.476	2.00493e-55	6.15114e-52	-0.473	PVP01_0709600::conserved protein, unknown function	PF3D7_0911100::conserved protein, unknown function	mixedLS	sporozoite	NA
OG0001518	-4.1446	0.003	0.491	8.22797e-58	2.52434e-54	-0.488	PVP01_0723700::ribosomal RNA-processing protein 8, putative	PF3D7_0925200::ribosomal RNA-processing protein 8, putative	NA	sporozoite	LiverStageEarly
OG0001551	2.63561	0.5	0.18	4.51941e-36	1.38656e-32	0.32	PVP01_0730900::profilin, putative	PF3D7_0932200::profilin	mixedLS	sporozoite	InsectStageFinal
OG0001592	-2.74973	0.052	0.405	1.37712e-32	4.22501e-29	-0.353	PVP01_0943000::conserved Plasmodium protein, unknown function	PF3D7_1142300::conserved Plasmodium membrane protein, unknown function	NA	sporozoite	NA
OG0001638	-0.27789	0.039	0.369	3.97389e-29	1.21919e-25	-0.33	PVP01_0932800::ubiquitin-like protein, putative	PF3D7_1132000::ubiquitin-like protein, putative	mixedLS	sporozoite	NA
OG0001707	2.33755	0.34	0.127	1.21589e-20	3.73035e-17	0.213	PVP01_0921600::palmitoyltransferase DHHC3, putative	PF3D7_1121000::palmitoyltransferase DHHC3	mixedLS	sporozoite	InsectStageFinal
OG0001755	3.18069	0.395	0.077	1.54428e-39	4.73784e-36	0.318	PVP01_0912800::conserved protein, unknown function	PF3D7_1112000::conserved protein, unknown function	NA	sporozoite	NA
OG0001756	2.82665	0.458	0.078	7.59339e-48	2.32965e-44	0.38	PVP01_0912600::peptidyl-prolyl cis-trans isomerase, putative	PF3D7_1111800::peptidyl-prolyl cis-trans isomerase, putative	NA	sporozoite	NA
OG0001815	2.1929	0.251	0.088	2.943e-14	9.02913e-11	0.163	PVP01_0305400::conserved protein, unknown function	PF3D7_0406000::conserved protein, unknown function	NA	sporozoite	NA
OG0001851	2.96032	0.301	0.047	9.33009e-31	2.86247e-27	0.254	PVP01_1315300::calmodulin, putative	PF3D7_1434200::calmodulin	mixedLS	sporozoite	NA
OG0002018	2.41183	0.267	0.097	3.47739e-15	1.06686e-11	0.17	PVP01_1030500::actin-depolymerizing factor 1, putative	PF3D7_0503400::actin-depolymerizing factor 1	mixedLS	sporozoite	NA
OG0002038	-4.87502	0	0.252	2.11707e-26	6.49516e-23	-0.252	PVP01_1027200::transcription factor 25, putative	PF3D7_0506800::transcription factor 25, putative	NA	sporozoite	NA
OG0002092	3.25341	0.594	0.097	3.17357e-71	9.7365e-68	0.497	PVP01_1131800::conserved Plasmodium protein, unknown function	PF3D7_0617300::conserved Plasmodium protein, unknown function	NA	sporozoite	InsectStageFinal
OG0002142	-1.90634	0.029	0.504	2.3443e-50	7.1923e-47	-0.475	PVP01_1122200::E3 ubiquitin-protein ligase RNF5, putative	PF3D7_0627300::E3 ubiquitin-protein ligase RNF5, putative	mixedLS	sporozoite	LiverStageEarly
OG0002153	2.37918	0.424	0.13	4.01102e-31	1.23058e-27	0.294	PVP01_1120200::phosphatidylcholine-sterol acyltransferase, putative	PF3D7_0629300::phospholipase, putative	NA	sporozoite	InsectStageFinal
OG0002201	1.87981	0.251	0.095	1.10426e-12	3.38788e-09	0.156	PVP01_1111200::falcilysin, putative	PF3D7_1360800::falcilysin	NA	sporozoite	NA
OG0002253	2.48002	0.283	0.055	4.10981e-25	1.26089e-21	0.228	PVP01_0802200::transformer-2 protein homolog beta, putative	PF3D7_1002400::transformer-2 protein homolog beta, putative	NA	sporozoite	NA
OG0002286	2.62203	0.301	0.056	1.79742e-27	5.51448e-24	0.245	PVP01_0807300::conserved protein, unknown function	PF3D7_1007600::conserved protein, unknown function	NA	sporozoite	NA
OG0002289	2.09191	0.293	0.078	6.38868e-21	1.96005e-17	0.215	PVP01_0807700::histone deacetylase 2, putative	PF3D7_1008000::histone deacetylase 2	mixedLS	sporozoite	NA
OG0002308	2.51668	0.414	0.108	1.14086e-33	3.50016e-30	0.306	PVP01_0811600::conserved protein, unknown function	PF3D7_1011500::conserved protein, unknown function	NA	sporozoite	NA
OG0002449	3.05869	0.56	0.194	5.25157e-46	1.61118e-42	0.366	PVP01_1014700::V-type proton ATPase 16 kDa proteolipid subunit, putative	PF3D7_0519200::V-type proton ATPase 16 kDa proteolipid subunit	mixedLS	sporozoite	NA
OG0002454	2.20382	0.346	0.16	1.83168e-15	5.6196e-12	0.186	PVP01_1014200::FoP domain-containing protein, putative	PF3D7_0519700::FoP domain-containing protein, putative	mixedLS	sporozoite	NA
OG0002505	-2.30059	0.105	0.376	1.11661e-21	3.42576e-18	-0.271	PVP01_1004000::RING zinc finger protein, putative	PF3D7_0529900::RING zinc finger protein, putative	NA	sporozoite	NA
OG0002611	2.61128	0.33	0.059	1.25513e-31	3.85074e-28	0.271	PVP01_1252500::iron-sulfur cluster assembly protein ISU, putative	PF3D7_1454500::iron-sulfur cluster assembly protein ISU, putative	NA	sporozoite	NA
OG0002624	3.06043	0.521	0.089	4.45893e-58	1.368e-54	0.432	PVP01_1249700::thioredoxin 1, putative	PF3D7_1457200::thioredoxin 1	NA	sporozoite	InsectStageFinal
OG0002650	3.14254	0.327	0.055	1.13804e-33	3.49152e-30	0.272	PVP01_1245500::40S ribosomal protein S28e, putative	PF3D7_1461300::40S ribosomal protein S28e, putative	NA	sporozoite	NA
OG0002751	1.98814	0.259	0.081	6.58979e-16	2.02175e-12	0.178	PVP01_1225100::AMP deaminase, putative	PF3D7_1329400::AMP deaminase	NA	sporozoite	NA
OG0002763	-6.66009	0	0.327	2.05834e-35	6.31498e-32	-0.327	PVP01_1222500::conserved protein, unknown function	PF3D7_1332200::conserved protein, unknown function	NA	sporozoite	NA
OG0002853	2.76916	0.382	0.07	5.9671e-37	1.83071e-33	0.312	PVP01_1203000::conserved Plasmodium protein, unknown function	PF3D7_1351800::conserved Plasmodium protein, unknown function	mixedLS	sporozoite	NA
OG0002901	2.87833	0.5	0.147	3.48102e-42	1.06798e-38	0.353	PVP01_1411700::RNA-binding protein, putative	PF3D7_1310700::RNA-binding protein, putative	mixedLS	sporozoite	NA
OG0002975	2.81699	0.343	0.075	2.21289e-30	6.78913e-27	0.268	PVP01_1422800::conserved Plasmodium protein, unknown function	PF3D7_0713700::conserved Plasmodium protein, unknown function	NA	sporozoite	NA
OG0002991	2.93421	0.272	0.044	2.85266e-27	8.75197e-24	0.228	PVP01_1425700::conserved protein, unknown function	PF3D7_0814600::conserved protein, unknown function	NA	sporozoite	InsectStageFinal
OG0003130	-0.838104	0.01	0.487	7.56514e-54	2.32099e-50	-0.477	PVP01_1450600::CWC16 domain-containing protein, putative	PF3D7_1232400::CWC16 domain-containing protein, putative	NA	sporozoite	NA
OG0003141	2.27231	0.335	0.078	2.2393e-27	6.87017e-24	0.257	PVP01_1453000::CHCH domain-containing protein, putative	PF3D7_1234900::CHCH domain-containing protein, putative	NA	sporozoite	NA
OG0003143	-2.0958	0.008	0.739	1.59599e-99	4.89649e-96	-0.731	PVP01_1453600::N6-adenosine-methyltransferase, putative	PF3D7_1235500::N6-adenosine-methyltransferase, putative	mixedLS	sporozoite	NA
OG0003190	1.9528	0.264	0.094	7.47242e-15	2.29254e-11	0.17	PVP01_1461800::conserved protein, unknown function	PF3D7_1244700::conserved protein, unknown function	NA	sporozoite	MotilityActivation
OG0003276	3.10758	0.359	0.055	3.22371e-38	9.89035e-35	0.304	PVP01_1136000::conserved Plasmodium protein, unknown function	PF3D7_0613100::conserved Plasmodium protein, unknown function	NA	sporozoite	NA
OG0003294	2.01703	0.482	0.225	8.27352e-25	2.53832e-21	0.257	PVP01_0210700::thrombospondin-related sporozoite protein, putative	PF3D7_0104000::thrombospondin-related sporozoite protein	NA	sporozoite	InsectStageFinal
OG0003348	-1.90075	0.065	0.349	8.28154e-23	2.54078e-19	-0.284	PVP01_0410300::serine/threonine protein kinase STK2, putative	PF3D7_0214600::serine/threonine protein kinase STK2, putative	NA	sporozoite	InsectStageFinal
OG0003368	-4.68788	0.382	0.95	4.55116e-129	1.3963e-125	-0.568	PVP01_0835600::circumsporozoite (CS) protein	PF3D7_0304600::circumsporozoite (CS) protein	hypnozoite	sporozoite	InsectStageFinal
OG0003414	2.65659	0.469	0.146	9.07948e-37	2.78559e-33	0.323	PVP01_0602700::myosin essential light chain ELC, putative	PF3D7_1017500::myosin essential light chain ELC	NA	sporozoite	NA
OG0003430	-3.9255	0.018	0.255	1.42928e-22	4.38503e-19	-0.237	PVP01_0607000::schizont egress antigen-1, putative	PF3D7_1021800::schizont egress antigen-1	mixedLS	sporozoite	NA
OG0003433	3.10492	0.312	0.049	2.14875e-32	6.59238e-29	0.263	PVP01_0607900::phospholipid scramblase, putative	PF3D7_1022700::phospholipid scramblase, putative	NA	sporozoite	InsectStageFinal
OG0003437	-6.90379	0	0.429	5.1097e-49	1.56766e-45	-0.429	PVP01_0609000::conserved Plasmodium protein, unknown function	PF3D7_1023800::conserved Plasmodium protein, unknown function	NA	sporozoite	NA
OG0003467	-3.50177	0.058	0.469	2.74317e-42	8.41605e-39	-0.411	PVP01_0618200::S-adenosylmethionine decarboxylase/ornithine decarboxylase, putative	PF3D7_1033100::S-adenosylmethionine decarboxylase/ornithine decarboxylase	NA	sporozoite	LiverStageEarly
OG0003546	2.95614	0.571	0.099	9.45095e-64	2.89955e-60	0.472	PVP01_0317600::V-type ATPase V0 subunit e, putative	PF3D7_0721900::V-type ATPase V0 subunit e, putative	NA	sporozoite	NA
OG0003549	-1.80127	0.199	0.664	2.90053e-36	8.89883e-33	-0.465	PVP01_0319000::conserved protein, unknown function	PF3D7_0723300::conserved protein, unknown function	NA	sporozoite	InsectStageFinal
OG0003605	1.65462	0.317	0.13	4.73375e-15	1.45231e-11	0.187	PVP01_0526500::mRNA-binding protein PUF2, putative	PF3D7_0417100::mRNA-binding protein PUF2	NA	sporozoite	NA
OG0003606	-3.76211	0.003	0.272	4.42528e-28	1.35767e-24	-0.269	PVP01_0526800::conserved Plasmodium protein, unknown function	PF3D7_0417400::conserved Plasmodium protein, unknown function	NA	sporozoite	NA
OG0003675	1.48729	0.332	0.146	3.94737e-14	1.21105e-10	0.186	PVP01_0712500::conserved Plasmodium protein, unknown function	PF3D7_0914100::conserved Plasmodium protein, unknown function	NA	sporozoite	InsectStageFinal
OG0003682	2.56979	0.262	0.053	9.43793e-23	2.89556e-19	0.209	PVP01_0714500::thioredoxin 3, putative	PF3D7_0916100::thioredoxin 3	NA	sporozoite	NA
OG0003753	-5.29024	0.021	0.628	8.39704e-76	2.57621e-72	-0.607	PVP01_0947600::sporozoite asparagine-rich protein	PF3D7_1147000::sporozoite and liver stage asparagine-rich protein	NA	sporozoite	NA
OG0003815	-6.54262	0.031	0.574	4.95022e-66	1.51873e-62	-0.543	PVP01_0929800::parasitophorous vacuolar protein 1, putative	PF3D7_1129100::parasitophorous vacuolar protein 1	hypnozoite	blood-stage	LiverStageEarly
OG0003822	2.79286	0.542	0.1	1.55044e-56	4.75676e-53	0.442	PVP01_0927900::conserved Plasmodium protein, unknown function	PF3D7_1127200::conserved Plasmodium protein, unknown function	NA	sporozoite	NA
OG0003856	-5.11216	0.003	0.405	4.2037e-45	1.2897e-41	-0.402	PVP01_0912900::conserved Plasmodium protein, unknown function	PF3D7_1112100::conserved Plasmodium protein, unknown function	NA	sporozoite	NA
OG0003902	-3.73144	0.003	0.282	2.8362e-29	8.70148e-26	-0.279	PVP01_0306900::conserved Plasmodium protein, unknown function	PF3D7_0407600::conserved Plasmodium protein, unknown function	NA	sporozoite	NA
OG0003912	-4.54481	0.003	0.26	1.41828e-26	4.3513e-23	-0.257	PVP01_1313200::translocon component PTEX150, putative	PF3D7_1436300::translocon component PTEX150	mixedLS	blood-stage	NA
OG0004033	2.77622	0.275	0.045	6.13516e-27	1.88227e-23	0.23	PVP01_1026100::conserved Plasmodium protein, unknown function	PF3D7_0507900::conserved Plasmodium protein, unknown function	NA	sporozoite	InsectStageFinal
OG0004045	-3.72001	0.018	0.296	4.6955e-27	1.44058e-23	-0.278	PVP01_1022500::RNA pseudouridylate synthase, putative	PF3D7_0511500::RNA pseudouridylate synthase, putative	NA	sporozoite	LiverStageEarly
OG0004064	-4.03409	0.099	0.643	3.34707e-65	1.02688e-61	-0.544	PVP01_1132600::TRAP-like protein, putative	PF3D7_0616500::TRAP-like protein	NA	sporozoite	InsectStageFinal
OG0004125	-3.54201	0.003	0.296	9.3861e-31	2.87966e-27	-0.293	PVP01_1112000::conserved Plasmodium protein, unknown function	PF3D7_1359900::conserved Plasmodium membrane protein, unknown function	NA	sporozoite	LiverStageEarly
OG0004259	3.516	0.599	0.091	1.06495e-74	3.26727e-71	0.508	PVP01_1011900::conserved Plasmodium protein, unknown function	PF3D7_0522000::conserved Plasmodium protein, unknown function	NA	sporozoite	InsectStageFinal
OG0004260	3.19674	0.539	0.086	1.46294e-61	4.48831e-58	0.453	PVP01_1011800::conserved Plasmodium protein, unknown function	PF3D7_0522100::conserved Plasmodium protein, unknown function	mixedLS	blood-stage	NA
OG0004334	2.5628	0.969	0.349	9.88287e-122	3.03206e-118	0.62	PVP01_1258000::gamete egress and sporozoite traversal protein, putative	PF3D7_1449000::gamete egress and sporozoite traversal protein, putative	NA	sporozoite	InsectStageFinal
OG0004436	-4.33729	0.024	0.501	3.73419e-53	1.14565e-49	-0.477	PVP01_1227100::conserved Plasmodium protein, unknown function	PF3D7_1327300::conserved Plasmodium protein, unknown function	NA	sporozoite	NA
OG0004480	2.65652	0.843	0.282	5.75852e-90	1.76671e-86	0.561	PVP01_1212300::sporozoite protein essential for cell traversal, putative	PF3D7_1342500::sporozoite protein essential for cell traversal	NA	sporozoite	InsectStageFinal
OG0004481	-1.60134	0.045	0.302	3.95434e-21	1.21319e-17	-0.257	PVP01_1211900::AP2 domain transcription factor, putative	PF3D7_1342900::AP2 domain transcription factor, putative	NA	sporozoite	NA
OG0004551	3.34402	0.843	0.133	5.42926e-118	1.6657e-114	0.71	PVP01_1413500::conserved Plasmodium protein, unknown function	PF3D7_1312500::conserved Plasmodium protein, unknown function	NA	sporozoite	NA
OG0004612	-2.54393	0.304	0.698	2.51553e-44	7.71764e-41	-0.394	PVP01_1435400::cell traversal protein for ookinetes and sporozoites	PF3D7_1216600::cell traversal protein for ookinetes and sporozoites	NA	sporozoite	InsectStageFinal
OG0004668	3.16947	0.641	0.116	1.73989e-75	5.33797e-72	0.525	PVP01_1453200::conserved protein, unknown function	PF3D7_1235100::conserved protein, unknown function	mixedLS	sporozoite	NA
OG0004770	3.07426	0.764	0.33	8.97124e-73	2.75238e-69	0.434	PVP01_0611700::conserved Plasmodium protein, unknown function	PF3D7_1026500::conserved Plasmodium protein, unknown function	NA	sporozoite	NA
OG0004771	3.04403	0.605	0.116	1.0304e-68	3.16127e-65	0.489	PVP01_0613700::conserved Plasmodium protein, unknown function	PF3D7_1028600::conserved Plasmodium protein, unknown function	NA	sporozoite	InsectStageFinal
OG0004805	-4.57452	0.016	0.571	2.44012e-66	7.48629e-63	-0.555	PVP01_1117100::conserved Plasmodium protein, unknown function	PF3D7_1354700::conserved Plasmodium protein, unknown function	NA	sporozoite	NA
OG0004819	1.95813	0.275	0.083	8.15193e-18	2.50101e-14	0.192	PVP01_1003900::conserved Plasmodium protein, unknown function	PF3D7_0530000::conserved Plasmodium protein, unknown function	hypnozoite	sporozoite	NA
OG0004922	2.56518	0.673	0.304	7.29256e-51	2.23736e-47	0.369	PVP01_1456100::COPI associated protein, putative	PF3D7_1238000::COPI associated protein, putative	NA	sporozoite	InsectStageFinal
OG0004962	-4.67444	0.003	0.318	1.68758e-33	5.1775e-30	-0.315	PVP01_0504800::early transcribed membrane protein	PF3D7_0829600::early transcribed membrane protein 8	hypnozoite	sporozoite	LiverStageEarly
OG0004965	-4.74233	0	0.33	8.31296e-36	2.55042e-32	-0.33	PVP01_0701300::conserved Plasmodium protein, unknown function	PF3D7_0902900::conserved Plasmodium protein, unknown function	hypnozoite	sporozoite	LiverStageEarly
