# Supplementary material for: Single-cell RNA sequencing of Plasmodium vivax sporozoites reveals stage- and species-specific transcriptomic signatures
Source: PLoS Negl Trop Dis. 2022 Aug 4;16(8):e0010633. doi: 10.1371/journal.pntd.0010633 (PMC9380936; doi:10.1371/journal.pntd.0010633)
Supplement: S13 Table — (XLSX) [file pntd.0010633.s013.xlsx]

## Sheet: Sheet1
Supplementary Table S13. Alignment statistics for P. vivax bloodstage scRNA-seq data downloaded from SRA (PRJNA603327) and remapped using STARsolo.
	Sample 69				Sample 70				Sample 71				Sample 72				Sample 73				Sample 74				Sample 75				Sample 76				Sample 77				Sample 78
Host	Saimiri boliviensis				Aotus nancymaae				Aotus nancymaae				Saimiri boliviensis				Saimiri boliviensis				Aotus nancymaae				Aotus nancymaae				Saimiri boliviensis				Aotus nancymaae				Aotus nancymaae
P. vivax strain	NIH-1993				Indonesia-I				Indonesia-I				NIH-1993				Chesson				Chesson				Chesson				AMRU-I				AMRU-I				AMRU-I
Drug Treatment	NoTreatment				CQ (16h; 5mg/kg)				NoTreatment				NoTreatment				NoTreatment				CQ (16h; 10mg/kg)				NoTreatment				NoTreatment				CQ (16h; 10mg/kg)				NoTreatment
Collection Day (day post infection; DPI)	15DPI				16DPI				12DPI				21DPI				24DPI				16DPI				12DPI				24DPI				16DPI				12DPI
Animal ID	3879				86574				86754				5541				4215				86436				86436				5107				86416				86416
RunID	SRR11008269				SRR11008270				SRR11008271				SRR11008272				SRR11008273				SRR11008274				SRR11008275				SRR11008276				SRR11008277				SRR11008278
	- UTRs	+ UTRs	% change		- UTRs	+ UTRs	% change		- UTRs	+ UTRs	% change		- UTRs	+ UTRs	% change		- UTRs	+ UTRs	% change		- UTRs	+ UTRs	% change		- UTRs	+ UTRs	% change		- UTRs	+ UTRs	% change		- UTRs	+ UTRs	% change		- UTRs	+ UTRs	% change
Number of Reads	176000000	176000000	1		92100000	92100000	1		148000000	148000000	1		107000000	107000000	1		166000000	166000000	1		87100000	87100000	1		152000000	152000000	1		128000000	128000000	1		111000000	111000000	1		140000000	140000000	1
Reads With Valid Barcodes	0.97	0.97	1		0.97	0.97	1		0.97	0.97	1		0.98	0.98	1		0.97	0.97	1		0.97	0.97	1		0.96	0.96	1		0.97	0.97	1		0.97	0.97	1		0.96	0.96	1
Sequencing Saturation	0.94	0.94	1		0.96	0.96	1		0.92	0.92	1		0.97	0.97	1		0.99	0.99	1		0.94	0.94	1		0.96	0.96	1		0.99	0.99	1		0.91	0.91	1		0.92	0.92	1
Q30 Bases in CB+UMI	0.98	0.98	1		0.99	0.99	1		0.99	0.99	1		0.98	0.98	1		0.99	0.99	1		0.99	0.99	1		0.99	0.99	1		0.99	0.99	1		0.99	0.99	1		0.99	0.99	1
Q30 Bases in RNA read	0.82	0.82	1		0.82	0.82	1		0.81	0.81	1		0.74	0.74	1		0.81	0.81	1		0.81	0.81	1		0.81	0.81	1		0.81	0.81	1		0.81	0.81	1		0.8	0.8	1
Reads Mapped to Genome: Unique+Multiple	0.77	0.77	1		0.73	0.73	1		0.81	0.81	1		0.81	0.81	1		0.57	0.57	1		0.78	0.78	1		0.88	0.88	1		0.46	0.46	1		0.86	0.86	1		0.83	0.83	1
Reads Mapped to Genome: Unique	0.75	0.75	1		0.72	0.72	1		0.8	0.8	1		0.8	0.8	1		0.56	0.56	1		0.77	0.77	1		0.87	0.87	1		0.45	0.45	1		0.85	0.85	1		0.82	0.82	1
Reads Mapped to Transcriptome: Unique+Multipe Genes	0.36	0.52	1.48		0.33	0.47	1.43		0.39	0.56	1.45		0.37	0.54	1.46		0.27	0.39	1.44		0.35	0.52	1.49		0.43	0.61	1.42		0.21	0.31	1.42		0.42	0.6	1.43		0.41	0.58	1.42
Reads Mapped to Transcriptome: Unique Genes	0.35	0.52	1.48		0.33	0.47	1.43		0.38	0.56	1.45		0.37	0.54	1.46		0.27	0.38	1.44		0.35	0.52	1.49		0.43	0.61	1.42		0.21	0.3	1.42		0.42	0.6	1.43		0.41	0.58	1.42
