# Supplementary material for: Single-cell RNA sequencing of Plasmodium vivax sporozoites reveals stage- and species-specific transcriptomic signatures
Source: PLoS Negl Trop Dis. 2022 Aug 4;16(8):e0010633. doi: 10.1371/journal.pntd.0010633 (PMC9380936; doi:10.1371/journal.pntd.0010633)
Supplement: S14 Table — (XLSX) [file pntd.0010633.s014.xlsx]

## Sheet: Sheet1
Supplementary Table S14. Differential gene expression between P. vivax sporozoites and erythrocytic-stage parasites.
gene_id	description	Stage	average log2 fold-change	proportion of sporozoites with gene detected	proportion of erythrocytic-stages with gene detected	adjusted p value	p value	absolute difference in proportion cell with gene detected	Proportion sum of expression across sporozoites and erythryctic stages
PVP01_0835600	circumsporozoite (CS) protein	Sporozoite	8.64554	0.825	0	0	0	0.825	0.825
PVP01_0611700	conserved Plasmodium protein, unknown function	Sporozoite	6.66896	0.77	0.024	0	0	0.746	0.794
PVP01_1258000	gamete egress and sporozoite traversal protein, putative	Sporozoite	6.56875	0.963	0.128	0	0	0.835	1.091
PVP01_1212300	sporozoite protein essential for cell traversal, putative	Sporozoite	6.46869	0.91	0.092	0	0	0.818	1.002
PVP01_0938800	sporozoite surface protein essential for liver stage development, putative	Sporozoite	6.42514	0.659	0	0	0	0.659	0.659
PVP01_0835700	1-cys-glutaredoxin-like protein-1, putative	Sporozoite	5.62163	0.756	0.102	0	0	0.654	0.858
PVP01_1413500	conserved Plasmodium protein, unknown function	Sporozoite	5.60192	0.851	0.151	0	0	0.7	1.002
PVP01_0927900	conserved Plasmodium protein, unknown function	Sporozoite	5.58907	0.649	0.035	0	0	0.614	0.684
PVP01_0412300	secreted protein with altered thrombospondin repeat domain, putative	Sporozoite	5.22632	0.723	0.095	0	0	0.628	0.818
PVP01_1022600	conserved Plasmodium protein, unknown function	Sporozoite	5.15919	0.705	0.156	0	0	0.549	0.861
PVP01_0210700	thrombospondin-related sporozoite protein, putative	Sporozoite	5.09301	0.501	0.043	0	0	0.458	0.544
PVP01_1120200	phosphatidylcholine-sterol acyltransferase, putative	Sporozoite	4.94611	0.563	0.067	0	0	0.496	0.63
PVP01_0505600	GPI-anchored micronemal antigen	Sporozoite	4.85118	0.608	0.063	0	0	0.545	0.671
PVP01_1456100	COPI associated protein, putative	Sporozoite	4.65565	0.737	0.146	0	0	0.591	0.883
PVP01_1432200	kelch domain-containing protein, putative	Sporozoite	4.56778	0.568	0.091	0	0	0.477	0.659
PVP01_0923400	calcium-dependent protein kinase 6, putative	Sporozoite	4.54819	0.527	0.104	0	0	0.423	0.631
PVP01_1315100	conserved protein, unknown function	Sporozoite	4.49847	0.707	0.23	0	0	0.477	0.937
PVP01_0712500	conserved Plasmodium protein, unknown function	Sporozoite	4.44047	0.505	0.098	0	0	0.407	0.603
PVP01_0934200	apical membrane antigen 1	Sporozoite	4.34196	0.505	0.041	0	0	0.464	0.546
PVP01_1011900	conserved Plasmodium protein, unknown function	Sporozoite	4.2964	0.617	0.247	0	0	0.37	0.864
PVP01_0613700	conserved Plasmodium protein, unknown function	Sporozoite	4.19705	0.612	0.2	0	0	0.412	0.812
PVP01_0811600	conserved protein, unknown function	Sporozoite	4.19554	0.608	0.148	0	0	0.46	0.756
PVP01_1461700	ADP-ribosylation factor GTPase-activating protein 1, putative	Sporozoite	4.00659	0.569	0.225	0	0	0.344	0.794
PVP01_1011800	conserved Plasmodium protein, unknown function	Sporozoite	3.98196	0.598	0.272	0	0	0.326	0.87
PVP01_1225100	AMP deaminase, putative	Sporozoite	3.97226	0.596	0.206	0	0	0.39	0.802
PVP01_0914900	rhomboid protease ROM1, putative	Sporozoite	3.77582	0.53	0.207	0	0	0.323	0.737
PVP01_0912600	peptidyl-prolyl cis-trans isomerase, putative	Sporozoite	3.71244	0.552	0.267	0	0	0.285	0.819
PVP01_0917500	conserved protein, unknown function	Sporozoite	3.53429	0.708	0.303	0	0	0.405	1.011
PVP01_1131800	conserved Plasmodium protein, unknown function	Sporozoite	3.50694	0.603	0.358	0	0	0.245	0.961
PVP01_0317600	V-type ATPase V0 subunit e, putative	Sporozoite	3.37675	0.673	0.427	0	0	0.246	1.1
PVP01_0710400	inhibitor of cysteine proteases, putative	Sporozoite	3.28903	0.728	0.586	0	0	0.142	1.314
PVP01_1249700	thioredoxin 1, putative	Sporozoite	3.11312	0.629	0.43	0	0	0.199	1.059
PVP01_1422800	conserved Plasmodium protein, unknown function	Sporozoite	3.08954	0.527	0.383	0	0	0.144	0.91
PVP01_1453200	conserved protein, unknown function	Sporozoite	3.07293	0.616	0.451	0	0	0.165	1.067
PVP01_1014200	FoP domain-containing protein, putative	Sporozoite	2.99461	0.538	0.406	0	0	0.132	0.944
PVP01_0602700	myosin essential light chain ELC, putative	Sporozoite	2.83733	0.561	0.273	0	0	0.288	0.834
PVP01_1111200	falcilysin, putative	Sporozoite	2.74462	0.552	0.434	0	0	0.118	0.986
PVP01_0515400	heat shock protein 70, putative	Sporozoite	2.70824	0.603	0.474	0	0	0.129	1.077
PVP01_1014700	V-type proton ATPase 16 kDa proteolipid subunit, putative	Sporozoite	2.57943	0.564	0.527	0	0	0.037	1.091
PVP01_1411700	RNA-binding protein, putative	Sporozoite	1.66756	0.558	0.293	0	0	0.265	0.851
PVP01_1460700	translation initiation factor SUI1, putative	Sporozoite	0.911518	0.788	0.847	0	0	0.059	1.635
PVP01_1465600	bax inhibitor 1, putative	Sporozoite	0.497405	0.175	0.541	0	0	0.366	0.716
PVP01_0906600	conserved Apicomplexan protein, unknown function	Sporozoite	0.250354	0.164	0.536	0	0	0.372	0.7
PVP01_1311000	polyubiquitin, putative	Sporozoite	0.0178842	0.263	0.717	0	0	0.454	0.98
PVP01_1119800	SET domain protein, putative	Sporozoite	0.459985	0.178	0.503	2.46586e-256	5.79657e-260	0.325	0.681
PVP01_1412600	conserved Plasmodium protein, unknown function	Sporozoite	0.249406	0.184	0.504	7.86322e-239	1.84843e-242	0.32	0.688
PVP01_0619000	ubiquitin-conjugating enzyme E2, putative	Sporozoite	0.292374	0.231	0.59	1.60353e-223	3.76947e-227	0.359	0.821
PVP01_1030500	actin-depolymerizing factor 1, putative	Sporozoite	0.14301	0.292	0.6	5.65994e-139	1.3305e-142	0.308	0.892
PVP01_1262200	fructose 1,6-bisphosphate aldolase, putative	Sporozoite	0.0274505	0.284	0.577	3.44662e-135	8.10207e-139	0.293	0.861
PVP01_1240500	26S proteasome regulatory subunit RPN2, putative	Sporozoite	0.673659	0.239	0.53	1.04232e-122	2.45021e-126	0.291	0.769
PVP01_0106700	conserved Plasmodium protein, unknown function	Sporozoite	0.0897919	0.365	0.741	2.78568e-117	6.54838e-121	0.376	1.106
PVP01_0517100	14-3-3 protein, putative	Sporozoite	1.97202	0.451	0.5	8.66865e-86	2.03776e-89	0.049	0.951
PVP01_0730900	profilin, putative	Sporozoite	1.07352	0.587	0.743	2.49498e-76	5.86502e-80	0.156	1.33
PVP01_1440500	endoplasmin, putative	Sporozoite	0.909072	0.286	0.567	2.22517e-68	5.23078e-72	0.281	0.853
PVP01_1213900	sodium-dependent phosphate transporter, putative	Sporozoite	1.61296	0.439	0.509	8.82181e-48	2.07377e-51	0.07	0.948
PVP01_0516800	zinc finger protein, putative	Sporozoite	1.06501	0.302	0.535	5.51537e-30	1.29651e-33	0.233	0.837
PVP01_1453000	CHCH domain-containing protein, putative	Sporozoite	1.16843	0.313	0.542	2.63974e-20	6.20532e-24	0.229	0.855
PVP01_1144400	GYF domain-containing protein, putative	Sporozoite	1.91066	0.391	0.515	8.6773e-14	2.0398e-17	0.124	0.906
PVP01_1413800	eukaryotic translation initation factor 4 gamma, putative	Sporozoite	1.31156	0.31	0.507	1.0763e-08	2.53009e-12	0.197	0.817
PVP01_0905900	histone 2B, putative	BloodStage	6.77695	0.906	0.013	0	0	0.893	0.919
PVP01_0422600	early transcribed membrane protein	BloodStage	6.0065	0.868	0.003	0	0	0.865	0.871
PVP01_0300700	Plasmodium exported protein, unknown function	BloodStage	6.00427	0.819	0	0	0	0.819	0.819
PVP01_0622400	antigen UB05, putative	BloodStage	5.47142	0.769	0.003	0	0	0.766	0.772
PVP01_1201600	Plasmodium exported protein, unknown function	BloodStage	5.40192	0.754	0	0	0	0.754	0.754
PVP01_1131700	histone H2A, putative	BloodStage	5.21572	0.834	0.016	0	0	0.818	0.85
PVP01_1402800	Plasmodium exported protein, unknown function	BloodStage	5.20678	0.794	0	0	0	0.794	0.794
PVP01_1244000	glyceraldehyde-3-phosphate dehydrogenase, putative	BloodStage	5.1973	0.605	0.006	0	0	0.599	0.611
PVP01_0905800	histone H4, putative	BloodStage	5.08256	0.856	0.037	0	0	0.819	0.893
PVP01_0817300	40S ribosomal protein S3A, putative	BloodStage	5.05495	0.71	0	0	0	0.71	0.71
PVP01_0623100	Plasmodium exported protein, unknown function	BloodStage	4.95855	0.583	0	0	0	0.583	0.583
PVP01_1201700	membrane associated histidine-rich protein 2	BloodStage	4.75248	0.689	0	0	0	0.689	0.689
PVP01_1229700	L-lactate dehydrogenase	BloodStage	4.66252	0.609	0	0	0	0.609	0.609
PVP01_0532300	early transcribed membrane protein	BloodStage	4.638	0.951	0.131	0	0	0.82	1.082
PVP01_0816000	enolase, putative	BloodStage	4.50326	0.586	0	0	0	0.586	0.586
PVP01_1430300	acyl-CoA binding protein, putative	BloodStage	4.49707	0.605	0	0	0	0.605	0.605
PVP01_0522400	60S ribosomal protein L15, putative	BloodStage	4.44731	0.693	0.002	0	0	0.691	0.695
PVP01_1131200	60S ribosomal protein L27a, putative	BloodStage	4.43581	0.669	0	0	0	0.669	0.669
PVP01_0944700	40S ribosomal protein S21, putative	BloodStage	4.42597	0.733	0.004	0	0	0.729	0.737
PVP01_0925600	60S ribosomal protein L35, putative	BloodStage	4.4259	0.654	0	0	0	0.654	0.654
PVP01_1138700	histone H3, putative	BloodStage	4.41804	0.634	0	0	0	0.634	0.634
PVP01_1459800	40S ribosomal protein S17, putative	BloodStage	4.41203	0.651	0	0	0	0.651	0.651
PVP01_1426300	60S ribosomal protein L13-2, putative	BloodStage	4.37354	0.67	0.003	0	0	0.667	0.673
PVP01_0930700	60S ribosomal protein L38, putative	BloodStage	4.25743	0.654	0	0	0	0.654	0.654
PVP01_0910700	60S ribosomal protein L36, putative	BloodStage	4.23278	0.623	0	0	0	0.623	0.623
PVP01_1418700	40S ribosomal protein S19, putative	BloodStage	4.19006	0.635	0	0	0	0.635	0.635
PVP01_0702300	60S ribosomal protein L32, putative	BloodStage	4.16281	0.617	0	0	0	0.617	0.617
PVP01_0004210	early transcribed membrane protein	BloodStage	4.13972	0.618	0	0	0	0.618	0.618
PVP01_0827400	60S ribosomal protein L26, putative	BloodStage	4.09722	0.648	0	0	0	0.648	0.648
PVP01_1340400	40S ribosomal protein S8e, putative	BloodStage	4.0958	0.642	0.005	0	0	0.637	0.647
PVP01_0530900	40S ribosomal protein S19, putative	BloodStage	4.03487	0.614	0	0	0	0.614	0.614
PVP01_0315400	40S ribosomal protein S10, putative	BloodStage	4.02855	0.612	0	0	0	0.612	0.612
PVP01_1023000	translationally-controlled tumor protein homolog, putative	BloodStage	4.02639	0.694	0.006	0	0	0.688	0.7
PVP01_1231200	60S ribosomal protein L23, putative	BloodStage	4.02167	0.654	0	0	0	0.654	0.654
PVP01_1108100	reticulon-like protein, putative	BloodStage	4.01411	0.609	0	0	0	0.609	0.609
PVP01_0803800	60S ribosomal protein L13, putative	BloodStage	4.00921	0.638	0	0	0	0.638	0.638
PVP01_0111000	60S ribosomal protein L34, putative	BloodStage	4.00424	0.595	0	0	0	0.595	0.595
PVP01_0833200	40S ribosomal protein S23, putative	BloodStage	3.99419	0.623	0	0	0	0.623	0.623
PVP01_0716300	endoplasmic reticulum chaperone BiP, putative	BloodStage	3.99326	0.638	0	0	0	0.638	0.638
PVP01_0414800	60S ribosomal protein L37ae, putative	BloodStage	3.936	0.634	0	0	0	0.634	0.634
PVP01_1030200	60S ribosomal protein L31, putative	BloodStage	3.92713	0.657	0.003	0	0	0.654	0.66
PVP01_1303500	eukaryotic translation initiation factor 5A, putative	BloodStage	3.92528	0.649	0	0	0	0.649	0.649
PVP01_0405800	40S ribosomal protein S30, putative	BloodStage	3.91188	0.583	0	0	0	0.583	0.583
PVP01_1241400	conserved protein, unknown function	BloodStage	3.87681	0.643	0	0	0	0.643	0.643
PVP01_0317300	40S ribosomal protein S5, putative	BloodStage	3.86949	0.598	0	0	0	0.598	0.598
PVP01_1401600	Plasmodium exported protein, unknown function	BloodStage	3.8259	0.559	0	0	0	0.559	0.559
PVP01_0823300	40S ribosomal protein S15A, putative	BloodStage	3.80827	0.577	0	0	0	0.577	0.577
PVP01_1017800	40S ribosomal protein S11, putative	BloodStage	3.79541	0.567	0	0	0	0.567	0.567
PVP01_0216700	Plasmodium exported protein, unknown function	BloodStage	3.79516	0.625	0	0	0	0.625	0.625
PVP01_1113100	40S ribosomal protein S15, putative	BloodStage	3.74496	0.581	0	0	0	0.581	0.581
PVP01_1403700	40S ribosomal protein S7, putative	BloodStage	3.73471	0.561	0	0	0	0.561	0.561
PVP01_0833900	glutaredoxin 1, putative	BloodStage	3.73429	0.578	0	0	0	0.578	0.578
PVP01_1034400	Plasmodium exported protein, unknown function	BloodStage	3.72723	0.64	0	0	0	0.64	0.64
PVP01_0119400	Plasmodium exported protein, unknown function	BloodStage	3.72134	0.676	0.001	0	0	0.675	0.677
PVP01_1017000	60S ribosomal protein L12, putative	BloodStage	3.71435	0.571	0	0	0	0.571	0.571
PVP01_1260000	40S ribosomal protein S5, putative	BloodStage	3.67098	0.534	0	0	0	0.534	0.534
PVP01_1334600	60S ribosomal protein L10, putative	BloodStage	3.6672	0.633	0.002	0	0	0.631	0.635
PVP01_1246100	60S ribosomal protein L27, putative	BloodStage	3.66127	0.556	0	0	0	0.556	0.556
PVP01_1147600	Plasmodium exported protein, unknown function	BloodStage	3.6183	0.632	0	0	0	0.632	0.632
PVP01_0943300	60S ribosomal protein L35ae, putative	BloodStage	3.59805	0.581	0	0	0	0.581	0.581
PVP01_1327700	40S ribosomal protein S25, putative	BloodStage	3.59005	0.602	0	0	0	0.602	0.602
PVP01_0711600	elongation factor 1-beta, putative	BloodStage	3.58885	0.593	0	0	0	0.593	0.593
PVP01_1013900	40S ribosomal protein S9, putative	BloodStage	3.55439	0.558	0	0	0	0.558	0.558
PVP01_1231500	60S ribosomal protein L6, putative	BloodStage	3.53585	0.556	0	0	0	0.556	0.556
PVP01_1114800	elongation factor 1-alpha, putative	BloodStage	3.50173	0.692	0.012	0	0	0.68	0.704
PVP01_1336600	nuclear transport factor 2, putative	BloodStage	3.48673	0.543	0	0	0	0.543	0.543
PVP01_1401300	Plasmodium exported protein, unknown function	BloodStage	3.47448	0.625	0.001	0	0	0.624	0.626
PVP01_0943200	60S ribosomal protein L28, putative	BloodStage	3.47421	0.521	0	0	0	0.521	0.521
PVP01_0201200	Plasmodium exported protein, unknown function	BloodStage	3.45626	0.603	0	0	0	0.603	0.603
PVP01_1471900	Plasmodium exported protein (PHIST), unknown function	BloodStage	3.44928	0.51	0	0	0	0.51	0.51
PVP01_1321000	proliferation-associated protein 2g4, putative	BloodStage	3.3936	0.509	0	0	0	0.509	0.509
PVP01_1265900	KS1 protein precursor, putative	BloodStage	3.37979	0.685	0.008	0	0	0.677	0.693
PVP01_0105900	40S ribosomal protein S29, putative	BloodStage	3.37423	0.544	0	0	0	0.544	0.544
PVP01_0601200	Plasmodium exported protein, unknown function	BloodStage	3.35179	0.524	0	0	0	0.524	0.524
PVP01_1014500	40S ribosomal protein S24, putative	BloodStage	3.34777	0.514	0	0	0	0.514	0.514
PVP01_1222800	60S ribosomal protein L23, putative	BloodStage	3.34227	0.523	0	0	0	0.523	0.523
PVP01_1240900	40S ribosomal protein S3, putative	BloodStage	3.31688	0.521	0	0	0	0.521	0.521
PVP01_1106100	ubiquitin-60S ribosomal protein L40, putative	BloodStage	3.31659	0.674	0.01	0	0	0.664	0.684
PVP01_0618300	early transcribed membrane protein	BloodStage	3.26036	0.54	0.016	0	0	0.524	0.556
PVP01_0803300	40S ribosomal protein S20e, putative	BloodStage	3.25895	0.505	0	0	0	0.505	0.505
PVP01_1134600	60S ribosomal protein L19, putative	BloodStage	3.22303	0.551	0	0	0	0.551	0.551
PVP01_1265800	60S ribosomal protein L1, putative	BloodStage	3.21451	0.53	0	0	0	0.53	0.53
PVP01_0612900	60S ribosomal protein L3, putative	BloodStage	3.20837	0.557	0.006	0	0	0.551	0.563
PVP01_0512600	60S ribosomal protein L22, putative	BloodStage	3.20833	0.511	0	0	0	0.511	0.511
PVP01_1416400	conserved protein, unknown function	BloodStage	3.19773	0.534	0	0	0	0.534	0.534
PVP01_1456800	BTB/POZ domain-containing protein, putative	BloodStage	3.19128	0.537	0	0	0	0.537	0.537
PVP01_0201700	PIR protein	BloodStage	3.18619	0.538	0	0	0	0.538	0.538
PVP01_1426400	40S ribosomal protein S16, putative	BloodStage	3.17971	0.528	0.002	0	0	0.526	0.53
PVP01_1213600	60S ribosomal protein L18a, putative	BloodStage	3.13911	0.504	0	0	0	0.504	0.504
PVP01_0833100	40S ribosomal protein S12, putative	BloodStage	3.13544	0.504	0	0	0	0.504	0.504
PVP01_1323200	transcription factor BTF3, putative	BloodStage	3.12788	0.529	0	0	0	0.529	0.529
PVP01_1017100	60S ribosomal protein L2, putative	BloodStage	3.12773	0.508	0	0	0	0.508	0.508
PVP01_0819300	histone H2A.Z, putative	BloodStage	3.11589	0.775	0.049	0	0	0.726	0.824
PVP01_0312600	eukaryotic translation initiation factor 3 subunit I, putative	BloodStage	3.09267	0.504	0	0	0	0.504	0.504
PVP01_0817200	translation machinery-associated protein 7, putative	BloodStage	3.06262	0.558	0.003	0	0	0.555	0.561
PVP01_1469500	hypothetical protein	BloodStage	3.05423	0.514	0.001	0	0	0.513	0.515
PVP01_1436300	conserved Plasmodium protein, unknown function	BloodStage	2.98938	0.526	0	0	0	0.526	0.526
PVP01_1416500	phosphatidylinositol synthase, putative	BloodStage	2.95179	0.503	0	0	0	0.503	0.503
PVP01_1211800	phosphoethanolamine N-methyltransferase	BloodStage	2.92565	0.624	0.039	0	0	0.585	0.663
PVP01_0520100	26S protease regulatory subunit 6B, putative	BloodStage	2.89255	0.516	0	0	0	0.516	0.516
PVP01_1466000	26S protease regulatory subunit 8, putative	BloodStage	2.75786	0.509	0	0	0	0.509	0.509
PVP01_1246500	60S ribosomal protein L29, putative	BloodStage	2.7507	0.603	0.023	0	0	0.58	0.626
PVP01_1203300	60S ribosomal protein L17, putative	BloodStage	2.73106	0.643	0.032	0	0	0.611	0.675
PVP01_0820600	elongation factor 1-delta, putative	BloodStage	2.68511	0.517	0.012	0	0	0.505	0.529
PVP01_1346200	ribosomal protein S27a, putative	BloodStage	2.6847	0.57	0.027	0	0	0.543	0.597
PVP01_1302200	high mobility group protein B1, putative	BloodStage	2.66234	0.648	0.036	0	0	0.612	0.684
PVP01_1423100	histone H2B variant, putative	BloodStage	2.6031	0.75	0.071	0	0	0.679	0.821
PVP01_0507600	receptor for activated c kinase, putative	BloodStage	2.59858	0.57	0.008	0	0	0.562	0.578
PVP01_1015600	proteasome subunit beta type-1, putative	BloodStage	2.51585	0.529	0.008	0	0	0.521	0.537
PVP01_1022200	inositol-3-phosphate synthase, putative	BloodStage	2.48003	0.692	0.055	0	0	0.637	0.747
PVP01_1305300	eukaryotic translation initiation factor 3 subunit C, putative	BloodStage	2.39613	0.538	0.026	0	0	0.512	0.564
PVP01_1256900	signal recognition particle subunit SRP54, putative	BloodStage	2.25025	0.532	0.016	0	0	0.516	0.548
PVP01_0316800	conserved protein, unknown function	BloodStage	2.19652	0.589	0.05	0	0	0.539	0.639
PVP01_0944100	translation initiation factor eIF-1A, putative	BloodStage	2.0273	0.522	0.018	0	0	0.504	0.54
PVP01_0833000	60S ribosomal protein L7, putative	BloodStage	1.80905	0.685	0.085	0	0	0.6	0.77
PVP01_0922200	exported protein 1, putative	BloodStage	1.75883	0.725	0.115	0	0	0.61	0.84
PVP01_0316300	conserved protein, unknown function	BloodStage	1.75239	0.71	0.087	0	0	0.623	0.797
PVP01_0106600	60S ribosomal protein L37, putative	BloodStage	1.74763	0.623	0.064	0	0	0.559	0.687
PVP01_0612400	merozoite capping protein 1, putative	BloodStage	1.69393	0.701	0.185	0	0	0.516	0.886
PVP01_1426100	DNA/RNA-binding protein Alba 1, putative	BloodStage	1.60451	0.738	0.143	0	0	0.595	0.881
PVP01_1409300	40S ribosomal protein S27, putative	BloodStage	1.60382	0.664	0.094	0	0	0.57	0.758
PVP01_0835800	60S ribosomal protein L44, putative	BloodStage	1.51571	0.625	0.081	0	0	0.544	0.706
PVP01_0811900	PRE-binding protein, putative	BloodStage	1.47024	0.744	0.115	0	0	0.629	0.859
PVP01_0926900	40S ribosomal protein S18, putative	BloodStage	1.40745	0.572	0.081	0	0	0.491	0.653
PVP01_1213400	60S ribosomal protein L18-2, putative	BloodStage	1.3008	0.603	0.068	0	0	0.535	0.671
PVP01_0915000	GTPase-activating protein, putative	BloodStage	1.29413	0.546	0.059	0	0	0.487	0.605
PVP01_1316100	PHD finger protein PHD2, putative	BloodStage	1.29202	0.506	0.04	0	0	0.466	0.546
PVP01_1324800	60S ribosomal protein L5, putative	BloodStage	1.24561	0.543	0.068	0	0	0.475	0.611
PVP01_0937400	casein kinase 1, putative	BloodStage	1.19092	0.68	0.115	0	0	0.565	0.795
PVP01_0945000	60S ribosomal protein L41, putative	BloodStage	1.13264	0.501	0.071	0	0	0.43	0.572
PVP01_0903900	60S acidic ribosomal protein P1, putative	BloodStage	1.06885	0.598	0.151	0	0	0.447	0.749
PVP01_0720700	S-adenosylmethionine synthetase, putative	BloodStage	1.03917	0.733	0.181	0	0	0.552	0.914
PVP01_1463200	actin, putative	BloodStage	1.02926	0.769	0.418	0	0	0.351	1.187
PVP01_0806500	G-strand-binding protein 2, putative	BloodStage	0.970179	0.676	0.161	0	0	0.515	0.837
PVP01_0915400	cyclin-dependent-like kinase CLK3, putative	BloodStage	0.961913	0.517	0.048	0	0	0.469	0.565
PVP01_1253300	HSP90 co-chaperone p23, putative	BloodStage	0.83343	0.599	0.171	0	0	0.428	0.77
PVP01_1303000	nucleosome assembly protein, putative	BloodStage	0.804355	0.517	0.079	0	0	0.438	0.596
PVP01_0720600	ubiquitin-like protein, putative	BloodStage	0.789898	0.551	0.069	0	0	0.482	0.62
PVP01_0701600	ras-related protein RAB7, putative	BloodStage	0.776562	0.536	0.076	0	0	0.46	0.612
PVP01_0108700	heat shock protein 90, putative	BloodStage	0.659485	0.66	0.205	0	0	0.455	0.865
PVP01_1207300	DNA/RNA-binding protein Alba 4, putative	BloodStage	0.652459	0.68	0.176	0	0	0.504	0.856
PVP01_1212800	40S ribosomal protein S6, putative	BloodStage	0.461437	0.586	0.16	0	0	0.426	0.746
PVP01_0512900	conserved Plasmodium protein, unknown function	BloodStage	0.366031	0.515	0.1	0	0	0.415	0.615
PVP01_0405600	ribosome associated membrane protein RAMP4, putative	BloodStage	0.341347	0.534	0.149	0	0	0.385	0.683
PVP01_0917900	conserved protein, unknown function	BloodStage	0.270288	0.607	0.185	0	0	0.422	0.792
PVP01_1225700	transcriptional regulatory protein sir2a, putative	BloodStage	0.240709	0.521	0.091	0	0	0.43	0.612
PVP01_0939500	protein phosphatase PPM2, putative	BloodStage	0.184162	0.536	0.144	0	0	0.392	0.68
PVP01_1245500	40S ribosomal protein S28e, putative	BloodStage	0.15716	0.787	0.332	5.06331e-284	1.19025e-287	0.455	1.119
PVP01_1131600	histone H3 variant, putative	BloodStage	0.334439	0.889	0.626	8.38304e-109	1.97063e-112	0.263	1.515
